# Supplementary material for: lncRNA Expression Reveals the Potential Regulatory Roles in Hepatocyte Proliferation during Rat Liver Regeneration
Source: Biomed Res Int. 2019 Nov 11;2019:8597953. doi: 10.1155/2019/8597953 (PMC6885160; doi:10.1155/2019/8597953)
Supplement: Supplementary Materials — Table S1: results of analyzing differentially expressed lncRNAs at 2, 6, 12, 24, 30, 36, 72,120, and 168 h after PH was compared with CG. Table S2: results of analyzing differentially expressed mRNAs at 2, 6, 12, 24, 30, 36, 72,120, and 168 h after PH was compared with CG. Table S3: results of GO enrichment analysis of differentially expressed mRNAs. Table S4: screened coexpression pairs between DE lncRNAs and proliferation-related DE mRNAs based on the Pearson correlation coefficient. [file 8597953.f1.zip]

Archive with 4 entries (4 files):
- 8597953.f1/Table S1.xlsx
- 8597953.f1/Table S2.xlsx
- 8597953.f1/Table S3.xlsx
- 8597953.f1/Table S4.xlsx
