# Supplementary material for: lncRNA Expression Reveals the Potential Regulatory Roles in Hepatocyte Proliferation during Rat Liver Regeneration
Source: Biomed Res Int. 2019 Nov 11;2019:8597953. doi: 10.1155/2019/8597953 (PMC6885160; doi:10.1155/2019/8597953)
Supplement: Supplementary Materials — Table S1: results of analyzing differentially expressed lncRNAs at 2, 6, 12, 24, 30, 36, 72,120, and 168 h after PH was compared with CG. Table S2: results of analyzing differentially expressed mRNAs at 2, 6, 12, 24, 30, 36, 72,120, and 168 h after PH was compared with CG. Table S3: results of GO enrichment analysis of differentially expressed mRNAs. Table S4: screened coexpression pairs between DE lncRNAs and proliferation-related DE mRNAs based on the Pearson correlation coefficient. [file 8597953.f1.zip › 8597953.f1/Table S1.xlsx]

## Sheet: 2h vs 0h
id	baseMean	baseMean_control_0h	baseMean_case_2h	foldChange	log2FoldChange	pval	padj	up_down	expression_0h	expression_2h	locus	length	exon_count	gene_id	nearest_ref	class_code
NONRATT000007.2	44.2105	7.95352	80.4675	10.1172	3.33874	0.0488277	1	Up	0.149072	1.40757	1:1901580:1928246:+	21479469	10
NONRATT000054.2	17.0993	0	34.1987	Inf	Inf	0.0286913	0.923289	Up	3.62604e-26	1.24276	1:15819455:15826248:+	21509713	4
NONRATT000056.2	100.07	1.98838	198.151	99.6546	6.63886	3.54586e-05	0.00837424	Up	0.0496364	5.26972	1:15820516:15826630:+	21511020	3
NONRATT000330.2	238.299	100.413	376.186	3.74638	1.9055	0.0474578	1	Up	5.7888	20.5281	1:74021762:74022123:-	22884958	1
NONRATT000369.2	14.5847	0	29.1695	Inf	Inf	0.0423347	1	Up	0.000250244	1.91401	1:75605255:75610055:+	21691194	4
NONRATT000460.2	81.9763	0	163.953	Inf	Inf	1.50062e-05	0.00475219	Up	4.8167e-31	11.2549	1:81328169:81332405:+	21739316	3
NONRATT000603.2	213.254	426.508	0	0	#NAME?	1.94411e-09	3.86988e-06	Down	9.17138	0.000309767	1:91365197:91366164:+	21816710	1
NONRATT000780.2	58.7836	9.9419	107.625	10.8254	3.43635	0.0254606	0.882508	Up	0.333479	3.4654	1:126964855:126974450:+	21920972	6
NONRATT000892.2	37.7967	72.5759	3.01753	0.0415776	-4.58805	0.0188778	0.771387	Down	1.22383	0.0439073	X:156324474:156326495:+	41153129	4
NONRATT000919.2	24.8548	49.7095	0	0	#NAME?	0.00957364	0.5379	Down	1.68299	9.19735e-10	X:157125774:157126391:+	41168509	1
NONRATT000947.2	128.707	6.95933	250.455	35.9884	5.16946	9.78561e-05	0.0189379	Up	0.295789	10.6153	1:156288258:156289272:+	22002203	2
NONRATT000956.2	45.7659	0	91.5318	Inf	Inf	0.000738716	0.0989738	Up	6.73047e-29	4.41888	1:157573427:157654870:+	22010776	4
NONRATT001129.2	16.0935	0	32.187	Inf	Inf	0.0334745	1	Up	6.43697e-06	1.2157	1:185329164:185331332:+	22124983	4
NONRATT001137.2	24.6432	0	49.2863	Inf	Inf	0.00967836	0.539433	Up	1.82742e-22	0.438694	1:188436786:188444995:+	22132435	6
NONRATT001226.2	15.4099	30.8199	0	0	#NAME?	0.0377142	1	Down	1.59931	9.9413e-13	1:198958714:198962513:+	22186842	3
NONRATT001383.2	13.5789	0	27.1578	Inf	Inf	0.0494932	1	Up	5.14881e-19	1.30191	1:216698269:216700632:+	22275728	3
NONRATT001405.2	14.4158	28.8315	0	0	#NAME?	0.0440169	1	Down	0.712243	1.9052e-10	1:219346506:219347703:+	22286483	2
NONRATT001430.2	28.6665	0	57.3331	Inf	Inf	0.00576308	0.416076	Up	6.98388e-08	3.11299	1:220749976:220750341:+	22301185	1
NONRATT001499.2	88.9006	19.8838	157.917	7.94201	2.9895	0.0211895	0.806708	Up	0.343807	2.56922	1:224921323:224923782:+	22343963	6
NONRATT001513.2	18.1052	0	36.2104	Inf	Inf	0.0246773	0.86613	Up	2.52911e-21	1.03029	1:225071081:225071943:+	22356140	2
NONRATT001673.2	15.4099	30.8199	0	0	#NAME?	0.0377142	1	Down	0.414324	0.0038825	1:250512249:250513791:+	22463959	1
NONRATT001718.2	77.5468	155.094	0	0	#NAME?	2.4091e-05	0.00658203	Down	13.0969	7.7931e-06	1:258271484:258271730:+	22492457	1
NONRATT001742.2	14.5847	0	29.1695	Inf	Inf	0.0423347	1	Up	9.11994e-09	0.325844	1:261434057:261435821:+	22508836	1
NONRATT001805.2	37.7851	74.5643	1.00584	0.0134896	-6.21201	0.00573132	0.416076	Down	1.18444	0.0221206	1:266119048:266122364:+	22555317	2
NONRATT001824.2	16.4041	32.8083	0	0	#NAME?	0.0323439	0.984017	Down	2.90991	1.46613e-29	1:266483363:266484337:+	22566602	2
NONRATT001842.2	50.2922	0	100.584	Inf	Inf	0.000441594	0.0661632	Up	6.80191e-12	2.30737	1:267412624:267413932:+	22583016	2
NONRATT001847.2	23.6373	0	47.2747	Inf	Inf	0.0110854	0.582884	Up	0.000429964	1.53969	1:267507055:267508803:+	22586361	2
NONRATT001943.2	43.2513	0	86.5026	Inf	Inf	0.000986069	0.121344	Up	2.69201e-06	6.29797	1:4414411:4414683:-	22645871	1
NONRATT001976.2	21.3751	42.7502	0	0	#NAME?	0.0154849	0.69441	Down	1.46818	9.61777e-07	1:13384155:13384758:-	22664590	1
NONRATT002073.2	16.5964	0	33.1928	Inf	Inf	0.0309787	0.959811	Up	3.88015e-16	1.89163	1:37811143:37863769:-	22735893	4
NONRATT002289.2	43.2764	81.5236	5.02922	0.0616903	-4.01881	0.0243307	0.862657	Down	2.29723	0.147775	1:72924136:72925588:+	21684798	8
NONRATT002372.2	58.8419	0	117.684	Inf	Inf	0.000168871	0.0301673	Up	4.07208e-06	3.75639	1:80730796:80733423:-	22914594	2
NONRATT002504.2	18.1052	0	36.2104	Inf	Inf	0.0246773	0.86613	Up	0.00293761	1.63804	1:88879425:88881469:-	22986475	4
NONRATT002687.2	4609.49	392.705	8826.28	22.4756	4.49029	2.50884e-07	0.000166468	Up	20.6608	440.58	1:102786004:102788504:-	23084912	3
NONRATT002857.2	56.6688	113.338	0	0	#NAME?	0.000221195	0.0353841	Down	2.14125	0.00635947	1:146746269:146812587:-	23194947	7
NONRATT002862.2	35.7967	70.5875	1.00584	0.0142496	-6.13293	0.00713463	0.46025	Down	2.0757	0.0273484	1:146748695:146823762:-	23198362	6
NONRATT002900.2	32.6666	3.97676	61.3565	15.4288	3.94755	0.0443476	1	Up	0.11118	1.58712	X:157319039:157323878:-	41468697	3
NONRATT002909.2	34.2996	68.5991	0	0	#NAME?	0.00291885	0.262395	Down	1.90616	0	1:148089555:148090308:-	23203420	1
NONRATT003008.2	20.6198	0	41.2396	Inf	Inf	0.0170074	0.729172	Up	2.20124e-10	1.4185	1:167283470:167285873:-	23264485	3
NONRATT003031.2	1177.7	195.855	2159.55	11.0262	3.46287	3.91471e-05	0.00909126	Up	4.635	48.5546	1:170424034:170424992:-	23274910	2
NONRATT003071.2	33.8199	64.6224	3.01753	0.0466948	-4.42059	0.0277958	0.916176	Down	3.56721	0.162457	1:180644622:180644998:-	23296267	1
NONRATT003101.2	176.859	286.327	67.3915	0.235366	-2.08702	0.0433811	1	Down	5.73917	1.28708	1:189347199:189359732:-	23326593	3
NONRATT003231.2	13.9187	27.8373	0	0	#NAME?	0.0475431	1	Down	0.870866	8.39414e-06	1:199379374:199380046:-	23418174	1
NONRATT003232.2	16.0935	0	32.187	Inf	Inf	0.0334745	1	Up	0.000583372	0.985785	1:199379374:199380335:-	23418813	3
NONRATT003266.2	21.6256	0	43.2513	Inf	Inf	0.0147022	0.672483	Up	0	3.10061	1:202707731:202709488:-	23437309	2
NONRATT003452.2	26.346	52.6921	0	0	#NAME?	0.00788238	0.476869	Down	2.12761	6.01281e-28	1:220862473:220863476:-	23540528	3
NONRATT003465.2	20.6198	0	41.2396	Inf	Inf	0.0170074	0.729172	Up	5.36636e-09	2.09409	1:221115992:221116479:-	23545760	2
NONRATT003484.2	39.2705	78.541	0	0	#NAME?	0.0016072	0.168381	Down	1.63714	2.98438e-09	1:221346080:221348944:-	23559104	4
NONRATT003515.2	15.0877	0	30.1753	Inf	Inf	0.0391408	1	Up	6.16117e-18	1.48537	1:222232350:222233696:-	23572623	4
NONRATT003569.2	92.4597	184.919	0	0	#NAME?	5.79063e-06	0.00212613	Down	3.86166	4.25552e-10	1:226601488:226605762:-	23603410	4
NONRATT003581.2	629.149	258.489	999.809	3.86789	1.95155	0.0185775	0.763595	Up	7.78702	28.5614	1:227093976:227108467:-	23608919	3
NONRATT003583.2	46.2688	0	92.5376	Inf	Inf	0.000697609	0.0952989	Up	0.0041371	1.91127	1:227110935:227112482:-	23610751	3
NONRATT003698.2	31.3228	61.6398	1.00584	0.0163181	-5.93738	0.0117818	0.610852	Down	1.78703	0.0364878	1:247502378:247510760:-	23682208	4
NONRATT003712.2	26.1519	0	52.3039	Inf	Inf	0.00793984	0.476869	Up	1.3858e-12	2.64752	1:250692800:250702725:-	23692895	4
NONRATT003723.2	127.742	0	255.484	Inf	Inf	3.26082e-07	0.000181745	Up	2.36284e-07	3.16379	1:253119110:253122079:-	23701227	2
NONRATT003807.2	58.6572	117.314	0	0	#NAME?	0.000177367	0.0307527	Down	3.2241	4.00963e-18	1:263778533:263779291:-	23751018	1
NONRATT003847.2	21.6256	0	43.2513	Inf	Inf	0.0147022	0.672483	Up	8.22122e-26	1.34148	1:265511411:265515672:-	23776069	3
NONRATT003860.2	18.3925	36.785	0	0	#NAME?	0.0239874	0.854836	Down	1.18809	1.00629e-16	1:266048832:266051081:-	23783138	2
NONRATT003894.2	17.3983	34.7967	0	0	#NAME?	0.0278127	0.916176	Down	2.72965	0	1:267043734:267043996:-	23806754	1
NONRATT003913.2	17.8954	35.7908	0	0	#NAME?	0.0258273	0.886399	Down	1.59626	1.52938e-12	1:273814076:273814546:-	23817565	1
NONRATT003957.2	21.1227	0	42.2454	Inf	Inf	0.0158079	0.697289	Up	2.63186e-22	0.876156	1:281347512:281348468:-	23846665	1
NONRATT004019.2	14.9129	29.8257	0	0	#NAME?	0.0407436	1	Down	1.15994	2.45653e-07	10:11152331:11153914:+	23899471	4
NONRATT004035.2	31.317	62.634	0	0	#NAME?	0.00421436	0.343409	Down	1.4916	3.9358e-13	10:730264:750635:+	23854693	4
NONRATT004044.2	14.0818	0	28.1636	Inf	Inf	0.0457828	1	Up	1.6792e-05	0.746477	10:852981:859183:+	23863928	3
NONRATT004072.2	137.024	46.7269	227.321	4.86487	2.2824	0.0394758	1	Up	0.967733	4.49644	10:13786482:13791773:+	23922411	4
NONRATT004096.2	112.152	0	224.303	Inf	Inf	1.04996e-06	0.00047194	Up	1.23985e-08	8.83081	10:14257631:14258132:+	23932623	1
NONRATT004248.2	22.6315	0	45.263	Inf	Inf	0.0127447	0.633112	Up	9.01576e-17	1.14839	10:37594824:37607949:+	24029661	5
NONRATT004310.2	25.649	0	51.298	Inf	Inf	0.00847617	0.49595	Up	1.34794e-20	2.15046	10:43496099:43496665:+	24067494	2
NONRATT004383.2	26.8431	53.6863	0	0	#NAME?	0.00739573	0.463947	Down	0.957028	0.00285463	10:49307129:49310400:+	24118026	2
NONRATT004545.2	165.533	331.065	0	0	#NAME?	2.79093e-08	2.99145e-05	Down	16.6495	0.00101242	10:61449931:61451163:+	24222987	4
NONRATT004553.2	43.2221	4.97095	81.4733	16.3899	4.03473	0.0238832	0.854836	Up	0.114891	1.91892	10:61755041:61756125:+	24228141	2
NONRATT004676.2	80.3451	20.878	139.812	6.69663	2.74344	0.0385012	1	Up	0.776473	4.97061	10:71336123:71357902:+	24326550	5
NONRATT004718.2	121.53	201.821	41.2396	0.204338	-2.29097	0.0453614	1	Down	5.54722	1.07543	10:74907576:74912833:-	25069652	2
NONRATT004732.2	221.286	0	442.571	Inf	Inf	1.22414e-09	2.84286e-06	Up	6.75682e-08	7.62982	10:73902836:73920810:-	25056512	3
NONRATT004831.2	110.134	0.99419	219.274	220.555	7.785	5.79827e-06	0.00212613	Up	0.00488	1.59961	10:85782432:85785130:+	24442657	1
NONRATT004834.2	15.907	31.8141	0	0	#NAME?	0.0349181	1	Down	1.72623	0.0128832	10:86158571:86165793:+	24444415	2
NONRATT004837.2	29.1695	0	58.3389	Inf	Inf	0.00540958	0.400942	Up	2.10772e-19	1.54116	10:86223342:86235814:+	24446775	2
NONRATT005000.2	57.7603	12.9245	102.596	7.93812	2.9888	0.0477454	1	Up	0.37457	2.79172	10:95242861:95244482:+	24540467	3
NONRATT005222.2	19.614	0	39.2279	Inf	Inf	0.0197172	0.78497	Up	0.000353756	1.96148	10:11990579:11994459:-	24682936	5
NONRATT005234.2	18.8896	37.7792	0	0	#NAME?	0.0222799	0.831067	Down	1.72654	6.33884e-28	10:12887367:12888596:-	24687591	4
NONRATT005270.2	15.0877	0	30.1753	Inf	Inf	0.0391408	1	Up	4.96212e-08	0.757226	10:14442192:14445439:-	24714416	2
NONRATT005328.2	22.3693	44.7386	0	0	#NAME?	0.0134411	0.648512	Down	1.11303	0.00954676	10:16769853:16774901:-	24752314	2
NONRATT005378.2	57.836	0	115.672	Inf	Inf	0.000188833	0.0313237	Up	1.53423e-06	1.4729	10:34155517:34157064:-	24784364	1
NONRATT005389.2	119.495	205.797	33.1928	0.161289	-2.63228	0.02411	0.857011	Down	14.6731	2.26744	10:35737593:35737885:-	24791365	1
NONRATT005390.2	43.2473	86.4945	0	0	#NAME?	0.00101018	0.121344	Down	3.30177	0.0180179	10:35737594:35739606:-	24791909	4
NONRATT005487.2	48.7368	7.95352	89.5201	11.2554	3.49255	0.0345369	1	Up	0.215532	2.41151	10:46193292:46203118:-	24850423	6
NONRATT005489.2	28.3519	53.6863	3.01753	0.0562068	-4.15311	0.0478188	1	Down	1.12825	0.0522367	10:46572434:46573505:-	24851853	2
NONRATT005580.2	49.2689	2.98257	95.5552	32.0379	5.00171	0.00623151	0.427733	Up	0.0324701	1.00884	10:56277182:56279145:-	24911295	2
NONRATT005600.2	43.2513	0	86.5026	Inf	Inf	0.000986069	0.121344	Up	3.77854e-06	2.31716	10:56527322:56531443:-	24924507	5
NONRATT005634.2	13.5789	0	27.1578	Inf	Inf	0.0494932	1	Up	2.39762e-14	0.784049	10:57613879:57617820:-	24944162	4
NONRATT005673.2	391.112	113.338	668.886	5.90171	2.56113	0.00450469	0.362823	Up	6.04627	33.7995	10:59887816:59888206:-	24966882	1
NONRATT005772.2	47.7776	0	95.5552	Inf	Inf	0.000587654	0.0818837	Up	2.65626e-16	3.3821	10:67753080:67753637:-	25026477	1
NONRATT005843.2	93.5588	169.012	18.1052	0.107123	-3.22265	0.0126249	0.63279	Down	2.87055	0.295633	10:75029050:75030275:+	24352767	1
NONRATT005847.2	22.8664	45.7328	0	0	#NAME?	0.0125368	0.63279	Down	1.84061	6.14743e-13	10:74883461:74884200:+	24349780	2
NONRATT005949.2	129.251	0	258.502	Inf	Inf	2.92555e-07	0.000181499	Up	0.0106296	7.45286	10:85096508:85099341:-	25136346	3
NONRATT005957.2	260.428	100.413	420.443	4.18713	2.06596	0.0295998	0.948148	Up	0.896177	3.57334	10:85572571:85574889:-	25142904	1
NONRATT006021.2	28.3344	56.6688	0	0	#NAME?	0.00612213	0.425696	Down	3.02283	4.71131e-17	10:88433865:88434704:-	25181287	2
NONRATT006212.2	147.585	46.7269	248.443	5.31692	2.41059	0.0274711	0.916176	Up	0.538396	2.74684	10:97733700:97735485:-	25296103	1
NONRATT006258.2	32.3112	64.6224	0	0	#NAME?	0.00372568	0.316547	Down	2.19762	3.17263e-10	10:104512808:104513681:+	24591568	2
NONRATT006315.2	1488.4	128.251	2848.55	22.2108	4.47319	3.12616e-07	0.000181499	Up	4.80575	101.371	10:106973848:106974402:-	25364301	1
NONRATT006362.2	62.3099	8.94771	115.672	12.9276	3.69238	0.0157242	0.697289	Up	0.192962	2.35487	10:109756091:109757061:-	25393431	1
NONRATT006419.2	2891.93	922.609	4861.24	5.26902	2.39753	0.00228298	0.224899	Up	8.69035	43.4707	11:27608800:27611005:+	25436489	1
NONRATT006443.2	110.852	221.704	0	0	#NAME?	1.2132e-06	0.000528271	Down	11.0929	7.55892e-05	11:31806635:31812815:+	25450850	3
NONRATT006530.2	384.007	124.274	643.74	5.18001	2.37296	0.00817853	0.489097	Up	2.93001	14.3942	11:46205838:46206720:+	25515557	1
NONRATT006698.2	932.459	336.036	1528.88	4.54975	2.18579	0.00691719	0.452007	Up	8.51437	36.7276	11:81514488:81515535:+	25619069	2
NONRATT006699.2	2558.58	1078.7	4038.46	3.74384	1.90452	0.013653	0.648512	Up	18.1541	64.536	11:81515844:81517078:+	25620303	1
NONRATT006707.2	18.8896	37.7792	0	0	#NAME?	0.0222799	0.831067	Down	2.01126	1.24743e-27	11:82384280:82385297:+	25625276	2
NONRATT006789.2	44.76	0	89.5201	Inf	Inf	0.000828758	0.107924	Up	4.09715e-07	0.959413	11:2665263:2672597:-	25674323	3
NONRATT006821.2	593.267	288.315	898.218	3.1154	1.63942	0.0471408	1	Up	2.74445	8.09772	11:17072668:17074854:-	25697067	1
NONRATT006873.2	20.878	41.756	0	0	#NAME?	0.0166371	0.719941	Down	3.19803	1.46371e-30	11:31788282:31788553:-	25728041	1
NONRATT006895.2	16.5964	0	33.1928	Inf	Inf	0.0309787	0.959811	Up	3.03887e-23	1.03885	11:33789445:33807157:-	25741685	4
NONRATT006961.2	14.0818	0	28.1636	Inf	Inf	0.0457828	1	Up	4.24441e-21	1.41384	11:53515281:53528286:-	25782489	4
NONRATT007038.2	50.7543	6.95933	94.5493	13.586	3.76405	0.0230217	0.841955	Up	0.334374	4.52353	11:69064597:69091299:-	25836783	5
NONRATT007057.2	24.8548	49.7095	0	0	#NAME?	0.00957364	0.5379	Down	2.99528	5.75158e-18	11:70570446:70570791:-	25848595	1
NONRATT007130.2	50.2532	92.4597	8.04675	0.0870298	-3.52235	0.0315299	0.971986	Down	2.74872	0.221487	11:81623410:81624106:-	25908171	1
NONRATT007133.2	2748.16	996.179	4500.14	4.51741	2.1755	0.00524802	0.399595	Up	29.0132	124.458	11:81651988:81657056:-	25909896	4
NONRATT007183.2	18.6081	0	37.2162	Inf	Inf	0.0228945	0.839506	Up	1.75727e-24	0.971376	11:87557982:87577305:-	25940831	5
NONRATT007215.2	123.28	246.559	0	0	#NAME?	4.71985e-07	0.000252948	Down	16.0008	0.000910705	12:2170726:2172383:+	25961148	4
NONRATT007333.2	14.0818	0	28.1636	Inf	Inf	0.0457828	1	Up	4.98588e-18	0.724156	12:18164265:18165107:+	26031345	2
NONRATT007381.2	31.8316	60.6456	3.01753	0.0497568	-4.32896	0.0338144	1	Down	2.17233	0.114025	12:23350320:23390805:+	26063713	6
NONRATT007391.2	1017.03	1953.58	80.4675	0.0411897	-4.60157	3.09923e-07	0.000181499	Down	11.7105	0.459308	12:23814418:23817884:+	26073550	1
NONRATT007487.2	107.105	2.98257	211.227	70.8205	6.1461	4.57192e-05	0.0099962	Up	0.0722563	5.60773	12:38161647:38162391:+	26128460	1
NONRATT007489.2	64.1544	123.28	5.02922	0.0407952	-4.61546	0.00413309	0.342801	Down	3.4479	0.12199	12:38274347:38286216:+	26130463	6
NONRATT007498.2	84.9938	0	169.988	Inf	Inf	1.12041e-05	0.0037171	Up	2.67584e-05	1.195	12:38411658:38452648:+	26139452	11
NONRATT007502.2	62.634	125.268	0	0	#NAME?	0.000114663	0.0215907	Down	8.39249	8.77083e-14	12:38459826:38461972:+	26141659	3
NONRATT007530.2	623.576	7.95352	1239.2	155.805	7.2836	3.48746e-11	2.42971e-07	Up	0.279535	39.2227	12:39599116:39599823:+	26155270	2
NONRATT007550.2	14.0818	0	28.1636	Inf	Inf	0.0457828	1	Up	8.05883e-15	1.33445	12:40527760:40529332:+	26164958	3
NONRATT007552.2	422.558	754.59	90.5259	0.119967	-3.05929	0.000787358	0.104486	Down	66.672	7.60871	12:40619344:40619778:+	26165925	2
NONRATT007553.2	14.4158	28.8315	0	0	#NAME?	0.0440169	1	Down	1.58538	8.08038e-07	12:40619351:40619727:+	26166301	1
NONRATT007595.2	469.61	191.879	747.342	3.89487	1.96157	0.0222781	0.831067	Up	7.53972	27.8522	12:45905236:45912668:+	26192286	3
NONRATT007640.2	158.42	0	316.841	Inf	Inf	4.12558e-08	4.10613e-05	Up	0.00391783	5.89649	12:49552070:49557535:+	26219186	5
NONRATT007728.2	17.3983	34.7967	0	0	#NAME?	0.0278127	0.916176	Down	1.09568	3.09766e-16	12:9216797:9222172:-	26278108	4
NONRATT007757.2	195.11	3.97676	386.244	97.1253	6.60177	5.36335e-07	0.000276789	Up	0.0466141	4.0538	12:12409870:12411750:-	26300214	1
NONRATT007794.2	13.5789	0	27.1578	Inf	Inf	0.0494932	1	Up	1.23795e-33	0.464559	12:16287516:16288675:-	26321856	1
NONRATT007812.2	43.7444	87.4887	0	0	#NAME?	0.000953952	0.119751	Down	0.681681	0.00056935	12:18463900:18466576:-	26334582	1
NONRATT007949.2	22.8664	45.7328	0	0	#NAME?	0.0125368	0.63279	Down	1.77889	4.70447e-11	12:37904376:37905419:-	26420810	3
NONRATT007954.2	17.0993	0	34.1987	Inf	Inf	0.0286913	0.923289	Up	2.41802e-17	0.490503	12:38024517:38025879:-	26424474	1
NONRATT007974.2	27.1578	0	54.3156	Inf	Inf	0.00697732	0.452195	Up	3.16421e-13	1.43221	12:38793941:38804657:-	26436929	3
NONRATT008082.2	23.6373	0	47.2747	Inf	Inf	0.0110854	0.582884	Up	9.55303e-31	2.44429	12:48625474:48627242:-	26494830	3
NONRATT008097.2	15.5906	0	31.1812	Inf	Inf	0.0361912	1	Up	1.5352e-08	2.43243	12:51335029:51341712:-	26506296	3
NONRATT008120.2	15.4099	30.8199	0	0	#NAME?	0.0377142	1	Down	2.52609	1.41716e-26	13:1460600:1524703:+	26520608	2
NONRATT008127.2	119.532	27.8373	211.227	7.58791	2.9237	0.0134551	0.648512	Up	2.13192	15.1748	13:12298542:12298816:+	26524583	1
NONRATT008180.2	191.382	382.763	0	0	#NAME?	6.21785e-09	8.66396e-06	Down	10.7419	0.000215176	13:44974929:44986951:+	26559858	5
NONRATT008219.2	27.3402	54.6805	0	0	#NAME?	0.00694198	0.452007	Down	3.72165	1.26642e-13	13:50252755:50258945:+	26583468	3
NONRATT008383.2	49.7328	95.4423	4.02337	0.0421551	-4.56815	0.00963053	0.538923	Down	1.21887	0.0498856	13:78886162:78901025:+	26698389	5
NONRATT008386.2	29.8374	57.663	2.01169	0.034887	-4.84117	0.0261229	0.892149	Down	2.48968	0.082056	13:78973627:78979300:+	26700026	4
NONRATT008391.2	831.1	210.768	1451.43	6.88639	2.78375	0.00086717	0.111881	Up	5.36753	35.0645	13:79204474:79205290:+	26703534	1
NONRATT008451.2	68.8304	11.9303	125.73	10.5388	3.39763	0.0190272	0.772401	Up	0.550036	5.65232	13:89742337:89742777:+	26741642	1
NONRATT008544.2	17.3983	34.7967	0	0	#NAME?	0.0278127	0.916176	Down	0.359814	3.4972e-07	13:103408353:103410345:+	26797561	1
NONRATT008595.2	17.3983	34.7967	0	0	#NAME?	0.0278127	0.916176	Down	2.57933	7.44238e-20	13:1291952:1729534:-	26835422	3
NONRATT008653.2	13.9187	27.8373	0	0	#NAME?	0.0475431	1	Down	1.53259	1.51347e-30	13:35858096:35858476:-	26869685	1
NONRATT008709.2	26.8431	53.6863	0	0	#NAME?	0.00739573	0.463947	Down	3.41187	6.89723e-25	13:50557668:50558087:-	26909440	2
NONRATT008761.2	27.8373	55.6747	0	0	#NAME?	0.00651829	0.433327	Down	0.532705	4.12903e-10	13:53750469:53752636:-	26943374	1
NONRATT009123.2	64.8769	0	129.754	Inf	Inf	8.72608e-05	0.0173699	Up	1.0077e-31	7.36332	13:109820614:109849623:-	27179753	3
NONRATT009156.2	61.6398	123.28	0	0	#NAME?	0.000127783	0.0237405	Down	6.93884	0.0253842	14:570243:612045:+	27201194	3
NONRATT009184.2	18.6081	0	37.2162	Inf	Inf	0.0228945	0.839506	Up	1.99372e-19	0.951247	14:3204877:3219465:+	27212927	6
NONRATT009189.2	45.2357	90.4713	0	0	#NAME?	0.000804161	0.105709	Down	0.994057	0.000332692	14:3680661:3682553:+	27216814	1
NONRATT009200.2	24.8548	49.7095	0	0	#NAME?	0.00957364	0.5379	Down	1.42453	1.88673e-05	14:7125988:7128215:+	27223892	2
NONRATT009228.2	40.7192	2.98257	78.4558	26.3048	4.71725	0.013946	0.652871	Up	0.154979	3.97467	14:11200385:11200861:+	27245527	2
NONRATT009260.2	285.333	570.665	0	0	#NAME?	7.28845e-11	3.38524e-07	Down	10.513	0	14:17621404:17631613:+	27268767	8
NONRATT009266.2	13.5789	0	27.1578	Inf	Inf	0.0494932	1	Up	6.45186e-26	1.47826	14:19395738:19405311:+	27271937	3
NONRATT009268.2	15.0877	0	30.1753	Inf	Inf	0.0391408	1	Up	1.27371e-32	0.748029	14:19441391:19442174:+	27273143	1
NONRATT009281.2	410.095	135.21	684.98	5.06605	2.34086	0.00832716	0.493748	Up	10.8733	52.1242	14:22445342:22445601:+	27280459	1
NONRATT009350.2	34.7967	69.5933	0	0	#NAME?	0.00274743	0.25186	Down	5.90322	0	14:43204885:43205130:+	27327004	1
NONRATT009403.2	15.4099	30.8199	0	0	#NAME?	0.0377142	1	Down	0.977813	3.59818e-28	14:64686861:64695277:+	27355289	2
NONRATT009419.2	79.5352	159.07	0	0	#NAME?	1.9761e-05	0.00572505	Down	5.45078	3.77392e-07	14:71437009:71452244:+	27364096	6
NONRATT009611.2	140.076	40.7618	239.391	5.87292	2.55408	0.0219666	0.829493	Up	2.05096	11.4962	14:106039131:106056654:+	27485488	4
NONRATT009625.2	27.3519	52.6921	2.01169	0.0381782	-4.71111	0.0340334	1	Down	2.33092	0.100274	14:107617198:107617910:+	27492678	2
NONRATT009626.2	60.7836	11.9303	109.637	9.1898	3.20003	0.0327717	0.99486	Up	0.636274	5.42827	14:107617513:107617910:+	27493075	1
NONRATT009709.2	77.6401	139.187	16.0935	0.115625	-3.11247	0.0228226	0.839506	Down	11.4183	1.23883	14:5451201:5451455:-	27558216	1
NONRATT009743.2	328.349	524.932	131.766	0.251014	-1.99416	0.0280296	0.916819	Down	22.8607	5.44322	14:10652177:10652654:-	27582561	1
NONRATT009876.2	13.9187	27.8373	0	0	#NAME?	0.0475431	1	Down	1.09215	3.50837e-13	14:42478792:42491067:-	27677063	6
NONRATT009898.2	43.2473	86.4945	0	0	#NAME?	0.00101018	0.121344	Down	5.35692	0.000713851	14:44296113:44316725:-	27691670	3
NONRATT009925.2	17.8954	35.7908	0	0	#NAME?	0.0258273	0.886399	Down	1.28291	4.69908e-06	14:56912271:56912858:-	27707774	2
NONRATT009945.2	815.531	378.786	1252.28	3.30602	1.7251	0.0320472	0.984017	Up	14.0343	44.0892	14:66535907:66536467:-	27720180	1
NONRATT009984.2	32.8199	63.6282	2.01169	0.0316163	-4.98319	0.0190689	0.772401	Down	1.42301	0.0380274	14:77272522:77279769:-	27740932	4
NONRATT009988.2	17.0993	0	34.1987	Inf	Inf	0.0286913	0.923289	Up	5.28003e-14	1.0015	14:77402954:77404467:-	27743448	2
NONRATT010015.2	35.69	2.98257	68.3974	22.9324	4.51931	0.022674	0.839506	Up	0.126297	2.36176	14:86800341:86800912:-	27837706	1
NONRATT010196.2	35.2938	70.5875	0	0	#NAME?	0.00258659	0.24189	Down	6.02836	1.99297e-80	14:110728075:110728318:-	27879362	1
NONRATT010343.2	20.1169	0	40.2337	Inf	Inf	0.0183079	0.756981	Up	8.02108e-30	1.31755	15:24544018:24552726:+	27973007	4
NONRATT010348.2	15.907	31.8141	0	0	#NAME?	0.0349181	1	Down	1.09287	2.59712e-25	15:25322341:25335205:+	27975921	5
NONRATT010352.2	33.6958	0	67.3915	Inf	Inf	0.00307868	0.273238	Up	0.000745183	0.499464	15:25358945:25361623:+	27980181	1
NONRATT010401.2	16.4041	32.8083	0	0	#NAME?	0.0323439	0.984017	Down	1.94596	1.08426e-28	15:33079283:33079628:+	28007974	1
NONRATT010591.2	14.9129	29.8257	0	0	#NAME?	0.0407436	1	Down	1.11346	4.16635e-13	15:56771837:56776348:+	28122804	2
NONRATT010761.2	14.9129	29.8257	0	0	#NAME?	0.0407436	1	Down	1.06287	9.07331e-10	15:12872409:12887889:-	28225071	5
NONRATT010833.2	37.3113	69.5933	5.02922	0.0722658	-3.79054	0.0408172	1	Down	3.5013	0.245214	15:28308828:28309632:-	28262356	3
NONRATT010946.2	16.4041	32.8083	0	0	#NAME?	0.0323439	0.984017	Down	0.570326	0.00240479	15:38109631:38137880:-	28337765	11
NONRATT010948.2	57.3331	0	114.666	Inf	Inf	0.000199715	0.0327391	Up	6.47988e-10	4.03092	15:38113401:38130925:-	28339905	5
NONRATT010985.2	27.6607	0	55.3214	Inf	Inf	0.00654467	0.433327	Up	4.35874e-32	3.43782	15:41669506:41672032:-	28360298	2
NONRATT011008.2	31.6724	1.98838	61.3565	30.8575	4.94755	0.0210949	0.806708	Up	0.0756173	2.47137	15:42653152:42656834:+	28073399	3
NONRATT011168.2	42.7618	83.512	2.01169	0.0240886	-5.37551	0.00689574	0.452007	Down	1.64222	0.0450676	15:89267695:89268751:-	28487058	1
NONRATT011385.2	31.6841	0	63.3682	Inf	Inf	0.00394774	0.333381	Up	0.00390414	4.195	16:20000923:20008795:+	28626610	2
NONRATT011388.2	58.6572	117.314	0	0	#NAME?	0.000177367	0.0307527	Down	7.36693	3.7543e-19	16:20025594:20025925:+	28627342	1
NONRATT011444.2	43.2589	84.5062	2.01169	0.0238052	-5.39258	0.0065618	0.433327	Down	3.10495	0.0726536	16:21606999:21607563:+	28667776	1
NONRATT011472.2	26.1519	0	52.3039	Inf	Inf	0.00793984	0.476869	Up	2.329e-11	2.3589	16:32473602:32495734:+	28683194	4
NONRATT011473.2	14.4158	28.8315	0	0	#NAME?	0.0440169	1	Down	0.900823	8.14685e-23	16:32517666:32518327:+	28683855	1
NONRATT011638.2	1600.18	19.8838	3180.48	159.953	7.32151	4.74803e-13	6.61591e-09	Up	0.242592	36.658	16:74552812:74554523:+	28788840	1
NONRATT011739.2	379.551	112.343	646.758	5.75696	2.52531	0.00524108	0.399595	Up	0.818133	4.47763	16:7097579:7103524:-	28842032	10
NONRATT011758.2	86.4967	0.99419	171.999	173.004	7.43466	4.12658e-05	0.00942619	Up	0.0200391	2.43323	16:7626261:7627681:-	28853857	2
NONRATT011760.2	90.4094	19.8838	160.935	8.09377	3.01681	0.019533	0.784359	Up	0.761984	5.93619	16:7728622:7734927:-	28855415	5
NONRATT011771.2	39.2705	78.541	0	0	#NAME?	0.0016072	0.168381	Down	3.20521	6.2661e-06	16:8339237:8350047:-	28865406	4
NONRATT011819.2	16.5964	0	33.1928	Inf	Inf	0.0309787	0.959811	Up	1.71403e-29	1.17817	16:19046025:19052027:-	28897313	2
NONRATT011827.2	2146.61	834.126	3459.1	4.14697	2.05206	0.00829799	0.493748	Up	12.5631	49.4673	16:19384861:19390410:-	28904130	5
NONRATT012045.2	206.709	84.5062	328.911	3.89215	1.96057	0.0482498	1	Up	5.9339	22.009	16:62222519:62240030:-	29033096	5
NONRATT012050.2	44.7502	87.4887	2.01169	0.0229937	-5.44262	0.00565768	0.416076	Down	4.17773	0.0920106	16:68390462:68390897:-	29033949	1
NONRATT012137.2	15.907	31.8141	0	0	#NAME?	0.0349181	1	Down	1.89873	0.0272155	16:81658065:81664920:-	29085754	2
NONRATT012139.2	77.0497	154.099	0	0	#NAME?	2.53239e-05	0.00678582	Down	9.84759	0.0220289	16:81784347:81784673:-	29087049	1
NONRATT012167.2	70.9062	0.99419	140.818	141.641	7.1461	0.000178769	0.0307527	Up	0.0295902	3.6872	16:88344424:88345177:-	29099916	1
NONRATT012181.2	21.6256	0	43.2513	Inf	Inf	0.0147022	0.672483	Up	8.75465e-09	1.35471	17:823958:825066:+	29108082	2
NONRATT012412.2	24.6373	0.99419	48.2805	48.5626	5.60177	0.0251001	0.874363	Up	0.0186601	1.24436	17:30571948:30573328:+	29250782	2
NONRATT012480.2	209.252	337.03	81.4733	0.241739	-2.04848	0.0391613	1	Down	9.04239	2.08438	17:43633688:43634462:+	29290507	1
NONRATT012570.2	41.7425	0	83.485	Inf	Inf	0.00117508	0.134932	Up	1.10728e-06	5.28138	17:62464422:62464735:+	29350458	1
NONRATT012579.2	15.0877	0	30.1753	Inf	Inf	0.0391408	1	Up	0.000603894	0.892532	17:69377547:69379938:+	29354403	3
NONRATT012586.2	27.6607	0	55.3214	Inf	Inf	0.00654467	0.433327	Up	7.46503e-10	0.79286	17:70297312:70298695:+	29360335	1
NONRATT012597.2	34.7016	0	69.4032	Inf	Inf	0.00272212	0.251192	Up	2.66353e-17	3.57984	17:70705306:70711516:+	29366264	2
NONRATT012600.2	56.3272	0	112.654	Inf	Inf	0.000223468	0.0353841	Up	1.94486e-14	1.63619	17:70712375:70713734:+	29368907	1
NONRATT012636.2	66.3857	0	132.771	Inf	Inf	7.42002e-05	0.0152045	Up	2.70561e-05	3.13353	17:80887573:80891202:+	29389167	5
NONRATT012645.2	719.044	280.362	1157.73	4.1294	2.04593	0.0127677	0.633112	Up	3.59286	14.0751	17:82091069:82092691:+	29395259	1
NONRATT012668.2	528.013	180.943	875.084	4.83625	2.27389	0.00783909	0.476869	Up	3.49867	16.0293	17:86409600:86410677:+	29410448	1
NONRATT012705.2	38.2763	76.5526	0	0	#NAME?	0.00180823	0.185264	Down	0.862189	1.54799e-13	17:1029241:1031079:-	29434582	2
NONRATT012724.2	22.3693	44.7386	0	0	#NAME?	0.0134411	0.648512	Down	1.34429	2.91886e-14	17:3718225:3718933:-	29447850	2
NONRATT012768.2	53.7154	102.402	5.02922	0.0491127	-4.34776	0.00998825	0.554441	Down	8.02757	0.400237	17:8570459:8576202:-	29471950	2
NONRATT012872.2	416.469	678.038	154.9	0.228453	-2.13003	0.0152842	0.693714	Down	28.8812	6.23906	17:21981946:21982434:-	29540850	1
NONRATT012952.2	15.907	31.8141	0	0	#NAME?	0.0349181	1	Down	0.838705	0.000129264	17:42085029:42088445:-	29593140	2
NONRATT012992.2	62.3623	0	124.725	Inf	Inf	0.00011464	0.0215907	Up	5.39162e-05	2.07958	17:55230297:55231561:-	29628148	2
NONRATT013044.2	89.1024	157.082	21.1227	0.134469	-2.89465	0.0248906	0.869237	Down	5.39833	0.676258	17:44520536:44521139:+	29297920	1
NONRATT013086.2	21.8722	43.7444	0	0	#NAME?	0.0144217	0.672081	Down	1.45677	0	17:69667521:69668145:-	29673282	1
NONRATT013309.2	28.6665	0	57.3331	Inf	Inf	0.00576308	0.416076	Up	5.37939e-30	2.21165	18:26569183:26569697:+	29824717	1
NONRATT013333.2	26.1519	0	52.3039	Inf	Inf	0.00793984	0.476869	Up	2.92134e-10	1.34883	18:28383053:28386632:+	29839090	2
NONRATT013355.2	100.41	29.8257	170.993	5.73309	2.51931	0.0389734	1	Up	1.16386	6.42666	18:29171008:29222047:+	29860920	3
NONRATT013362.2	42.2163	4.97095	79.4617	15.9852	3.99866	0.0260499	0.891841	Up	0.163082	2.43103	18:29491967:29492725:+	29868104	2
NONRATT013366.2	188.415	30.8199	346.01	11.2268	3.48888	0.00131038	0.144911	Up	1.43006	15.0299	18:29539326:29539780:+	29869426	1
NONRATT013369.2	67.8362	9.9419	125.73	12.6465	3.66067	0.0133364	0.648512	Up	0.914169	10.5787	18:29587890:29588951:+	29871482	2
NONRATT013396.2	70.912	0	141.824	Inf	Inf	4.59677e-05	0.0099962	Up	7.73445e-22	8.8443	18:33471201:33707854:+	29883408	2
NONRATT013635.2	974.396	1504.21	444.583	0.295559	-1.75848	0.0270329	0.914264	Down	69.7363	19.567	18:81715528:81726821:+	30051352	4
NONRATT013834.2	459.942	125.268	794.617	6.34333	2.66524	0.00258413	0.24189	Up	1.5701	9.45782	18:55863079:55864736:-	30179785	1
NONRATT014008.2	13.5789	0	27.1578	Inf	Inf	0.0494932	1	Up	2.16345e-32	0.884175	19:9756739:9758201:+	30292053	2
NONRATT014268.2	1291.17	400.659	2181.68	5.44522	2.44499	0.00229192	0.224899	Up	7.47151	38.5904	19:42097996:42099111:+	30452055	1
NONRATT014385.2	18.1052	0	36.2104	Inf	Inf	0.0246773	0.86613	Up	0	1.5713	19:56209744:56212885:+	30526334	3
NONRATT014467.2	14657.5	1563.86	27751.2	17.7453	4.14937	9.564e-06	0.00333162	Up	33.0915	557.235	19:11301985:11303133:-	30574556	2
NONRATT014550.2	13.9187	27.8373	0	0	#NAME?	0.0475431	1	Down	1.23101	0	19:25123985:25127069:-	30630170	2
NONRATT014579.2	17.0993	0	34.1987	Inf	Inf	0.0286913	0.923289	Up	1.02617e-07	2.61191	19:26074976:26075232:-	30649769	1
NONRATT014662.2	41.7425	0	83.485	Inf	Inf	0.00117508	0.134932	Up	2.81881e-15	3.54344	19:39249614:39252131:-	30707618	2
NONRATT014728.2	17.6023	0	35.2045	Inf	Inf	0.0265994	0.90179	Up	1.74684e-14	1.90379	19:43989579:43991986:-	30750777	2
NONRATT014736.2	31.8257	61.6398	2.01169	0.0326362	-4.93738	0.0211676	0.806708	Down	1.83824	0.0525941	19:44282487:44283188:-	30756401	1
NONRATT014777.2	15.907	31.8141	0	0	#NAME?	0.0349181	1	Down	1.57132	1.59348e-30	19:53654618:53656989:-	30775145	3
NONRATT014799.2	23.8606	47.7211	0	0	#NAME?	0.0109361	0.582884	Down	1.3967	2.60182e-07	19:55720364:55862204:-	30792370	7
NONRATT014946.2	82.0207	164.041	0	0	#NAME?	1.54791e-05	0.00479301	Down	6.636	9.07831e-11	2:27236102:27236615:+	30877877	1
NONRATT015112.2	1420.43	141.175	2699.68	19.123	4.25723	9.04623e-07	0.000420167	Up	4.49867	81.8883	2:78214960:78253049:+	30992401	6
NONRATT015117.2	102.936	27.8373	178.034	6.39553	2.67706	0.0282	0.917357	Up	1.04838	6.32329	2:80131546:80205294:+	30995004	2
NONRATT015230.2	15.4099	30.8199	0	0	#NAME?	0.0377142	1	Down	2.6736	0	2:122855093:122865228:+	31069053	2
NONRATT015280.2	23.8606	47.7211	0	0	#NAME?	0.0109361	0.582884	Down	2.56136	1.94614e-20	2:141451227:141451615:+	31098824	1
NONRATT015328.2	78.6576	137.198	20.1169	0.146626	-2.76978	0.0383747	1	Down	10.4679	1.44741	2:154753178:154753450:+	31138511	1
NONRATT015416.2	23.8606	47.7211	0	0	#NAME?	0.0109361	0.582884	Down	3.44201	6.87353e-33	2:187690133:187690421:+	31191165	1
NONRATT015444.2	18.8896	37.7792	0	0	#NAME?	0.0222799	0.831067	Down	1.72681	2.23623e-09	2:188561915:188565333:+	31213318	4
NONRATT015468.2	15.907	31.8141	0	0	#NAME?	0.0349181	1	Down	1.14322	2.27332e-08	2:189430047:189438081:+	31231221	4
NONRATT015699.2	20.3809	40.7618	0	0	#NAME?	0.0178852	0.756981	Down	0.854897	5.43413e-08	2:211113163:211114163:+	31377410	1
NONRATT015713.2	20.3809	40.7618	0	0	#NAME?	0.0178852	0.756981	Down	2.45126	1.91597e-06	2:217207522:217207866:+	31387377	1
NONRATT015739.2	76.6692	133.221	20.1169	0.151003	-2.72735	0.04284	1	Down	4.9388	0.72045	2:221966646:221967208:+	31399290	1
NONRATT015837.2	226.818	0	453.636	Inf	Inf	9.31519e-10	2.59596e-06	Up	0.00199634	22.7792	2:250601084:250621284:+	31469407	3
NONRATT015855.2	42.7502	85.5004	0	0	#NAME?	0.00106991	0.12634	Down	0.767248	1.67946e-06	2:251763185:251766013:+	31481674	2
NONRATT015858.2	35.7075	0	71.4149	Inf	Inf	0.00240877	0.229889	Up	0.0128469	1.90363	2:251818419:251824227:+	31482733	3
NONRATT015859.2	19.614	0	39.2279	Inf	Inf	0.0197172	0.78497	Up	7.95712e-11	0.74615	2:251823735:251824784:+	31483782	1
NONRATT015905.2	80.9704	0	161.941	Inf	Inf	1.65623e-05	0.00501693	Up	0.000161388	1.34162	2:264825240:264833283:+	31525367	4
NONRATT015907.2	990.088	1572.81	407.367	0.259006	-1.94894	0.0147682	0.672483	Down	132.299	32.5591	2:265513597:265513844:+	31525614	1
NONRATT015915.2	137.135	27.8373	246.432	8.85256	3.1461	0.00636956	0.432943	Up	0.821523	6.83987	2:1501616:1560715:-	31532340	9
NONRATT015979.2	299.743	85.5004	513.986	6.01151	2.58773	0.00612788	0.425696	Up	3.26156	18.5799	2:24858061:24858606:-	31573434	1
NONRATT016006.2	79.0381	158.076	0	0	#NAME?	2.07597e-05	0.00578532	Down	1.26772	1.71775e-08	2:28926093:28933592:-	31588426	4
NONRATT016191.2	15.4099	30.8199	0	0	#NAME?	0.0377142	1	Down	1.18629	0	2:60314021:60314560:+	30979996	1
NONRATT016452.2	236.884	84.5062	389.262	4.60631	2.20361	0.0235205	0.850756	Up	2.00821	8.79027	2:157751280:157752154:-	31873310	1
NONRATT016618.2	74.5643	149.129	0	0	#NAME?	3.25751e-05	0.00810538	Down	3.64652	9.41035e-09	2:189889361:189892175:-	31971670	2
NONRATT016675.2	16.5964	0	33.1928	Inf	Inf	0.0309787	0.959811	Up	7.88438e-11	0.972395	2:198010143:198017086:-	32010765	3
NONRATT016697.2	23.6373	0	47.2747	Inf	Inf	0.0110854	0.582884	Up	4.59734e-32	2.6645	2:199867965:199889207:-	32022011	2
NONRATT016708.2	15.4099	30.8199	0	0	#NAME?	0.0377142	1	Down	2.2275	5.46784e-27	2:201528882:201529167:-	32027209	1
NONRATT016762.2	73.9295	0	147.859	Inf	Inf	3.36255e-05	0.00821997	Up	1.28726e-09	4.48555	2:210761304:210763655:-	32064063	2
NONRATT016763.2	283.591	95.4423	471.741	4.94268	2.30529	0.0144808	0.672483	Up	2.58172	12.1686	2:210761304:210766509:-	32064828	4
NONRATT016789.2	47.259	88.4829	6.03506	0.068206	-3.87396	0.0236898	0.850756	Down	2.50087	0.174839	2:211480119:211482147:-	32076543	2
NONRATT016824.2	22.1286	0	44.2571	Inf	Inf	0.0136833	0.648512	Up	9.19037e-08	1.55474	2:224772894:224773460:-	32108927	1
NONRATT016865.2	26.6549	0	53.3097	Inf	Inf	0.00744136	0.463947	Up	8.14119e-07	3.99033	2:231870913:231871306:-	32131369	2
NONRATT016884.2	20.1169	0	40.2337	Inf	Inf	0.0183079	0.756981	Up	9.27904e-24	0.442573	2:238110405:238112185:-	32146505	1
NONRATT016979.2	15.5906	0	31.1812	Inf	Inf	0.0361912	1	Up	1.40246e-09	0.757783	2:260861827:260874267:-	32208186	2
NONRATT017035.2	35.7075	0	71.4149	Inf	Inf	0.00240877	0.229889	Up	3.79032e-05	1.75063	20:3226312:3233693:+	32237385	4
NONRATT017147.2	31.6724	1.98838	61.3565	30.8575	4.94755	0.0210949	0.806708	Up	0.0663317	2.13062	20:5456012:5456580:+	32288871	1
NONRATT017172.2	679.954	171.001	1188.91	6.95264	2.79756	0.00100467	0.121344	Up	3.82442	25.2269	20:6357940:6358869:+	32303718	1
NONRATT017247.2	19.3867	38.7734	0	0	#NAME?	0.0206988	0.798939	Down	1.12077	7.65084e-33	20:10265912:10268015:+	32354684	2
NONRATT017411.2	33.8199	64.6224	3.01753	0.0466948	-4.42059	0.0277958	0.916176	Down	2.43406	0.0918493	20:38945267:38947081:+	32462112	3
NONRATT017478.2	19.3867	38.7734	0	0	#NAME?	0.0206988	0.798939	Down	2.85987	3.01814e-48	20:55253731:55265362:+	32496474	3
NONRATT017554.2	148.882	254.513	43.2513	0.169938	-2.55692	0.0198849	0.787149	Down	9.21355	1.50439	20:4771447:4772698:-	32532472	4
NONRATT017649.2	191.11	0	382.221	Inf	Inf	5.97901e-09	8.66396e-06	Up	3.67836e-07	9.71105	20:10668735:10669511:-	32577515	1
NONRATT017766.2	46.7717	0	93.5435	Inf	Inf	0.00065885	0.0908952	Up	6.03258e-12	5.54003	20:33487635:33488954:-	32655459	2
NONRATT017871.2	21.1227	0	42.2454	Inf	Inf	0.0158079	0.697289	Up	9.0511e-10	0.859978	3:2495086:2501498:+	32708175	6
NONRATT017993.2	39.7075	3.97676	75.4383	18.9698	4.24563	0.0231135	0.843099	Up	0.225457	4.11724	3:8633304:8635344:+	32786087	4
NONRATT018220.2	29.8257	59.6514	0	0	#NAME?	0.00507745	0.39088	Down	1.66424	6.68966e-17	3:55960321:55971381:+	32912894	7
NONRATT018259.2	25.1461	0	50.2922	Inf	Inf	0.00905422	0.514945	Up	2.72572e-32	1.90103	3:58802586:58864635:+	32938251	7
NONRATT018272.2	26.1519	0	52.3039	Inf	Inf	0.00793984	0.476869	Up	0.000417154	0.786851	3:62483766:62487699:+	32951706	9
NONRATT018326.2	14.5847	0	29.1695	Inf	Inf	0.0423347	1	Up	1.01572e-22	0.771457	3:72262553:72263293:+	32993487	1
NONRATT018538.2	208.229	340.013	76.4441	0.224827	-2.15311	0.0309972	0.959811	Down	12.6276	2.70779	3:114366647:114646999:+	33129556	4
NONRATT018642.2	25.3519	50.7037	0	0	#NAME?	0.00896751	0.514945	Down	1.42754	7.13417e-09	3:126345136:126345878:+	33199387	1
NONRATT018677.2	24.3577	48.7153	0	0	#NAME?	0.0102281	0.561096	Down	0.812308	7.6032e-20	3:140062418:140083019:+	33221020	4
NONRATT018700.2	1674.91	827.166	2522.66	3.04976	1.60869	0.0369381	1	Up	40.9017	118.428	3:145345844:145346264:+	33230627	1
NONRATT018703.2	2315.56	1097.59	3533.53	3.21936	1.68678	0.0279745	0.916819	Up	20.672	63.1607	3:145553866:145554969:+	33233647	1
NONRATT018705.2	17.8954	35.7908	0	0	#NAME?	0.0258273	0.886399	Down	1.69928	7.46603e-23	3:145648284:145648719:+	33234471	1
NONRATT018730.2	1295.65	665.113	1926.19	2.89603	1.53408	0.0484316	1	Up	4.3612	11.983	3:147607480:147614406:+	33251734	3
NONRATT018750.2	26.1519	0	52.3039	Inf	Inf	0.00793984	0.476869	Up	1.47086e-10	1.12528	3:148215581:148216710:+	33267054	2
NONRATT018895.2	53.7719	6.95933	100.584	14.4532	3.85331	0.0181161	0.756981	Up	0.275914	3.55357	3:163814944:163817911:+	33364893	5
NONRATT018977.2	122.992	209.774	36.2104	0.172616	-2.53436	0.0279372	0.916819	Down	7.2519	1.19536	3:176691435:176692268:+	33421679	4
NONRATT019058.2	30.1753	0	60.3506	Inf	Inf	0.00476756	0.3714	Up	1.33855e-14	2.76503	3:2850005:2850433:-	33466601	1
NONRATT019141.2	21.1227	0	42.2454	Inf	Inf	0.0158079	0.697289	Up	3.25293e-26	1.2982	3:8970416:8972564:-	33519343	4
NONRATT019160.2	17.3983	34.7967	0	0	#NAME?	0.0278127	0.916176	Down	0.767093	2.89859e-05	3:10222271:10226930:-	33528685	7
NONRATT019364.2	30.3228	60.6456	0	0	#NAME?	0.00477111	0.3714	Down	1.95853	3.41294e-09	3:57257393:57258033:-	33660778	1
NONRATT019380.2	30.3228	60.6456	0	0	#NAME?	0.00477111	0.3714	Down	1.95366	0	3:60057890:60061449:-	33669234	4
NONRATT019458.2	17.3983	34.7967	0	0	#NAME?	0.0278127	0.916176	Down	2.94069	5.45512e-07	3:80539238:80539566:-	33717516	2
NONRATT019549.2	24.8664	47.7211	2.01169	0.0421551	-4.56815	0.0445981	1	Down	1.61092	0.0667818	3:96025395:96040772:-	33783169	4
NONRATT019591.2	424.972	685.991	163.953	0.239001	-2.06491	0.0180805	0.756981	Down	9.68108	2.19045	3:110303514:110304986:-	33811049	1
NONRATT019609.2	16.4041	32.8083	0	0	#NAME?	0.0323439	0.984017	Down	1.268	0.00074522	3:112155495:112173768:-	33823343	7
NONRATT019675.2	83.485	0	166.97	Inf	Inf	1.29572e-05	0.00419875	Up	2.17774e-14	2.04199	3:121736865:121739165:+	33164968	2
NONRATT019677.2	473.989	131.233	816.745	6.22362	2.63775	0.00271838	0.251192	Up	6.53212	38.7269	3:121725191:121726060:+	33163351	2
NONRATT019786.2	390.906	62.634	719.178	11.4822	3.52133	0.000188112	0.0313237	Up	1.59783	17.3266	3:145807914:145834134:-	33950800	6
NONRATT019804.2	25.1461	0	50.2922	Inf	Inf	0.00905422	0.514945	Up	2.47765e-16	1.69593	3:147813469:147814053:-	33963577	1
NONRATT019845.2	26.1519	0	52.3039	Inf	Inf	0.00793984	0.476869	Up	3.90281e-09	1.93206	3:150803096:150803634:-	33992129	1
NONRATT019853.2	136.204	272.408	0	0	#NAME?	1.87706e-07	0.000145305	Down	13.6027	2.85594e-12	3:151248289:151258581:-	33997401	4
NONRATT019887.2	60.3506	0	120.701	Inf	Inf	0.000142937	0.0262064	Up	9.78439e-11	2.95993	3:154807033:154812902:+	33321586	4
NONRATT019964.2	15.4099	30.8199	0	0	#NAME?	0.0377142	1	Down	0.939056	2.75577e-11	3:161814384:161816991:-	34053185	2
NONRATT020234.2	17.6023	0	35.2045	Inf	Inf	0.0265994	0.90179	Up	4.16686e-14	1.733	4:34238834:34244557:+	34228483	3
NONRATT020242.2	24.1402	0	48.2805	Inf	Inf	0.0103536	0.56575	Up	3.78451e-25	1.3106	4:35984487:35985217:+	34231807	1
NONRATT020245.2	45.7735	84.5062	7.04091	0.0833182	-3.58522	0.0349815	1	Down	3.50746	0.28733	4:38338269:38420192:+	34233431	4
NONRATT020296.2	504.153	133.221	875.084	6.56864	2.71559	0.00192921	0.194794	Up	3.06552	19.0354	4:56547733:56550582:+	34266014	2
NONRATT020362.2	93.0092	176.966	9.05259	0.0511545	-4.289	0.00187923	0.191133	Down	6.71192	0.331098	4:62789127:62790328:+	34307507	2
NONRATT020414.2	32.6783	1.98838	63.3682	31.8692	4.99409	0.0189719	0.772401	Up	0.0470556	1.69273	4:71741570:71746773:+	34350694	3
NONRATT020773.2	22.3693	44.7386	0	0	#NAME?	0.0134411	0.648512	Down	2.13175	1.27358e-23	4:145017611:145049739:+	34584906	3
NONRATT020829.2	20.111	0.99419	39.2279	39.4571	5.30221	0.0445423	1	Up	0.0235385	0.599993	4:148782479:148784562:+	34609647	2
NONRATT020851.2	33925.1	14153.3	53697	3.79396	1.9237	0.0482283	1	Up	106.45	383.347	4:140915892:140918654:+	34581374	1
NONRATT020860.2	118.69	0	237.379	Inf	Inf	6.35783e-07	0.000316393	Up	2.73635e-05	2.77693	4:152966561:152968248:+	34630566	1
NONRATT021049.2	14.9129	29.8257	0	0	#NAME?	0.0407436	1	Down	1.13845	0	4:181096138:181106588:+	34764402	4
NONRATT021115.2	160.216	36.785	283.648	7.71096	2.94691	0.00726151	0.463947	Up	0.543826	4.02736	4:7818642:7822858:-	34806638	4
NONRATT021122.2	16.4041	32.8083	0	0	#NAME?	0.0323439	0.984017	Down	0.501897	4.73728e-05	4:8212206:8255519:-	34814084	8
NONRATT021175.2	59.7894	9.9419	109.637	11.0278	3.46307	0.0236844	0.850756	Up	0.0640591	0.699783	4:23132262:23135354:-	34853132	1
NONRATT021179.2	29.1695	0	58.3389	Inf	Inf	0.00540958	0.400942	Up	1.78029e-08	2.04387	4:25392054:25392618:-	34855678	2
NONRATT021208.2	36.7967	71.5817	2.01169	0.0281034	-5.15311	0.0126223	0.63279	Down	3.88909	0.0872487	4:28343193:28343573:-	34874516	1
NONRATT021220.2	4176.91	491.13	7862.68	16.0094	4.00084	2.37971e-06	0.000947395	Up	8.31602	126.454	4:30544834:30546060:-	34882143	1
NONRATT021258.2	25.8489	51.6979	0	0	#NAME?	0.0084051	0.494163	Down	1.78604	4.56749e-12	4:48879767:48927622:-	34913388	6
NONRATT021346.2	667.247	193.867	1140.63	5.88355	2.55669	0.00243404	0.230721	Up	8.13049	45.3648	4:66336480:66336976:-	34968269	1
NONRATT021420.2	19.8838	39.7676	0	0	#NAME?	0.0192366	0.774689	Down	1.02649	2.02426e-09	4:81235167:81236469:-	35017675	2
NONRATT021483.2	23.6373	0	47.2747	Inf	Inf	0.0110854	0.582884	Up	2.09836e-15	1.31492	4:99739878:99746525:-	35073514	4
NONRATT021532.2	28.3344	56.6688	0	0	#NAME?	0.00612213	0.425696	Down	1.2914	0.00226855	4:113953034:113954266:-	35106409	2
NONRATT021559.2	15.907	31.8141	0	0	#NAME?	0.0349181	1	Down	2.73945	3.52655e-31	4:117068076:117111508:-	35126165	4
NONRATT021735.2	35.7075	0	71.4149	Inf	Inf	0.00240877	0.229889	Up	5.99782e-07	2.71694	4:162829441:162829961:-	35343388	1
NONRATT021906.2	647.565	291.298	1003.83	3.44607	1.78495	0.029938	0.953732	Up	4.03822	13.2224	4:168470140:168471637:-	35370175	1
NONRATT021989.2	23.1344	0	46.2688	Inf	Inf	0.0118804	0.610852	Up	2.19711e-18	1.18308	4:182569441:182583792:-	35422389	8
NONRATT022001.2	83.6518	143.163	24.1402	0.16862	-2.56815	0.0477594	1	Down	9.64442	1.56164	5:189386:189694:+	35433200	1
NONRATT022095.2	178.31	38.7734	317.847	8.19754	3.03519	0.00472962	0.3714	Up	1.64508	12.9237	5:24411619:24414688:+	35489351	2
NONRATT022097.2	4745.53	1980.43	7510.64	3.79243	1.92312	0.0137934	0.651518	Up	18.9927	68.3726	5:24416432:24418598:+	35492238	1
NONRATT022098.2	3459.29	1425.67	5492.91	3.85287	1.94593	0.0120163	0.613316	Up	21.1159	77.1999	5:24418893:24420296:+	35493641	1
NONRATT022384.2	528.671	841.085	216.256	0.257116	-1.95951	0.0204593	0.798939	Down	24.6712	6.02498	5:112836483:112837191:+	35694325	1
NONRATT022634.2	16.0935	0	32.187	Inf	Inf	0.0334745	1	Up	0.01299	1.71698	5:145081871:145095206:+	35850362	6
NONRATT022730.2	16.5964	0	33.1928	Inf	Inf	0.0309787	0.959811	Up	8.87658e-24	0.868731	5:153269652:153273815:+	35918020	4
NONRATT022803.2	52.8068	0	105.614	Inf	Inf	0.000332111	0.0514182	Up	2.97175e-06	1.42298	5:158114263:158115726:+	35956911	1
NONRATT022820.2	31.8316	60.6456	3.01753	0.0497568	-4.32896	0.0338144	1	Down	3.28805	0.175543	5:159755594:159762335:+	35970661	3
NONRATT022881.2	97.9277	195.855	0	0	#NAME?	3.5571e-06	0.00137679	Down	1.61945	1.45356e-06	5:167661991:167664505:+	36000325	1
NONRATT022970.2	21.3751	42.7502	0	0	#NAME?	0.0154849	0.69441	Down	2.93743	9.29444e-18	5:1260964:1261265:-	36058643	1
NONRATT023017.2	19.8838	39.7676	0	0	#NAME?	0.0192366	0.774689	Down	2.66376	4.16112e-30	5:13065143:13065457:-	36083896	1
NONRATT023136.2	20.878	41.756	0	0	#NAME?	0.0166371	0.719941	Down	2.28508	0.00110727	5:50556927:50638147:-	36165635	2
NONRATT023164.2	14.4158	28.8315	0	0	#NAME?	0.0440169	1	Down	1.05435	1.12546e-06	5:58159062:58160917:-	36181551	3
NONRATT023213.2	69.4032	0	138.806	Inf	Inf	5.3853e-05	0.0113695	Up	2.50734e-06	3.94117	5:60992102:61037335:-	36211923	4
NONRATT023249.2	38.2763	76.5526	0	0	#NAME?	0.00180823	0.185264	Down	3.39061	4.78932e-24	5:73986136:73986607:-	36238821	1
NONRATT023284.2	18.3925	36.785	0	0	#NAME?	0.0239874	0.854836	Down	1.03288	1.23104e-33	5:76681887:76682624:-	36256049	1
NONRATT023285.2	16.5964	0	33.1928	Inf	Inf	0.0309787	0.959811	Up	0.000194497	1.79882	5:76717797:76756125:-	36256417	3
NONRATT023325.2	30.6782	0	61.3565	Inf	Inf	0.00447601	0.362609	Up	1.83519e-17	3.59859	5:87552696:87585939:-	36279914	2
NONRATT023335.2	79.1605	137.198	21.1227	0.153958	-2.69939	0.0424066	1	Down	7.71623	1.14702	5:92868535:92871528:-	36288759	2
NONRATT023367.2	69.3333	11.9303	126.736	10.6231	3.40913	0.0183964	0.758387	Up	0.39285	4.08585	5:105003830:105004441:-	36314382	1
NONRATT023483.2	8740.29	4031.44	13449.1	3.33606	1.73815	0.0309628	0.959811	Up	58.8472	186.358	5:134468660:134470083:-	36399850	1
NONRATT023517.2	31.3286	60.6456	2.01169	0.0331712	-4.91392	0.0223065	0.831067	Down	2.00581	0.0610308	5:136533787:136534745:-	36422976	3
NONRATT023570.2	40.2337	0	80.4675	Inf	Inf	0.00140255	0.151497	Up	1.91826e-12	1.50698	5:140107144:140108199:-	36451252	1
NONRATT023610.2	19.614	0	39.2279	Inf	Inf	0.0197172	0.78497	Up	8.38762e-18	0.971583	5:144405766:144424177:-	36478403	5
NONRATT023752.2	141.094	38.7734	243.414	6.27786	2.65027	0.0177202	0.755086	Up	2.05431	12.2733	5:156100838:156115834:-	36563807	3
NONRATT023801.2	25.8489	51.6979	0	0	#NAME?	0.0084051	0.494163	Down	0.437971	0.000171131	5:160230952:160233411:-	36603084	1
NONRATT023802.2	37.2162	0	74.4324	Inf	Inf	0.00200801	0.201292	Up	1.20431e-06	1.52697	5:160233599:160234563:-	36604048	1
NONRATT023866.2	528.997	1042.91	15.0877	0.0144669	-6.1111	4.85106e-09	8.44934e-06	Down	6.29334	0.084112	5:165991075:165994517:-	36648595	1
NONRATT023878.2	619.681	243.577	995.785	4.08818	2.03146	0.0146955	0.672483	Up	3.45152	13.3778	5:166994677:166996145:-	36658842	1
NONRATT024155.2	45.2473	88.4829	2.01169	0.0227353	-5.45892	0.00538608	0.400942	Down	4.52025	0.0885761	6:39609731:39610136:+	36835660	1
NONRATT024156.2	23.1344	0	46.2688	Inf	Inf	0.0118804	0.610852	Up	5.8262e-10	0.348642	6:37662695:37665299:+	36832864	1
NONRATT024163.2	95.4328	20.878	169.988	8.14195	3.02537	0.0172288	0.736397	Up	1.0698	8.27805	6:42852680:42855281:+	36838698	4
NONRATT024248.2	39.7676	79.5352	0	0	#NAME?	0.00151564	0.162453	Down	6.00295	8.3613e-09	6:59406538:59406814:+	36894232	1
NONRATT024282.2	20.878	41.756	0	0	#NAME?	0.0166371	0.719941	Down	1.93554	5.44616e-27	6:75533322:75533770:+	36914486	1
NONRATT024451.2	722.448	300.245	1144.65	3.81238	1.93069	0.0182651	0.756981	Up	16.2569	58.7894	6:104611042:104612771:+	37022083	4
NONRATT024452.2	24.1286	1.98838	46.2688	23.2696	4.54037	0.0476149	1	Up	0.0446883	1.00396	6:104611047:104613331:+	37022995	4
NONRATT024455.2	154.397	0	308.794	Inf	Inf	5.32753e-08	4.94892e-05	Up	0.00115113	8.12693	6:104611082:104614941:+	37024501	7
NONRATT024504.2	45.7309	5.96514	85.4967	14.3327	3.84124	0.0262058	0.892791	Up	0.077683	1.09218	6:107635329:107636868:-	37506612	1
NONRATT024745.2	91.0289	0	182.058	Inf	Inf	6.35514e-06	0.00227058	Up	0.00523168	2.6199	6:963901:988572:-	37226574	5
NONRATT024766.2	22.1286	0	44.2571	Inf	Inf	0.0136833	0.648512	Up	1.93214e-31	2.57879	6:2883318:2883740:-	37242215	2
NONRATT024928.2	204.959	39.7676	370.15	9.30784	3.21845	0.00218033	0.217006	Up	1.08795	9.65074	6:41827610:41839107:-	37336535	5
NONRATT024996.2	15.5906	0	31.1812	Inf	Inf	0.0361912	1	Up	4.13837e-07	0.584622	6:72377376:72378501:-	37382829	2
NONRATT025052.2	54.7038	105.384	4.02337	0.0381782	-4.71111	0.00618683	0.426769	Down	3.8874	0.153999	6:81209175:81209737:-	37417878	1
NONRATT025095.2	40.2337	0	80.4675	Inf	Inf	0.00140255	0.151497	Up	1.46348e-13	3.37562	6:93549489:93551800:-	37443813	2
NONRATT025149.2	33.3054	66.6107	0	0	#NAME?	0.00329636	0.288878	Down	3.80861	9.60305e-20	6:102266119:102268284:-	37477172	2
NONRATT025167.2	29.6666	0.99419	58.3389	58.6799	5.87479	0.0139626	0.652871	Up	0.0200911	1.32133	6:105263124:105263997:-	37494075	1
NONRATT025222.2	35.7075	0	71.4149	Inf	Inf	0.00240877	0.229889	Up	4.64879e-75	3.64929	6:107467941:107468329:+	37042728	1
NONRATT025239.2	23.3693	45.7328	1.00584	0.0219939	-5.50675	0.0298063	0.952572	Down	2.0768	0.0586377	6:110166093:110166555:-	37521167	1
NONRATT025410.2	51.7445	95.4423	8.04675	0.0843101	-3.56815	0.0281337	0.917357	Down	2.61516	0.209464	6:141344473:141345232:-	37622561	1
NONRATT025450.2	56.8302	0	113.66	Inf	Inf	0.000211247	0.0342269	Up	1.77899e-19	7.73992	7:2616788:2619195:+	37642339	3
NONRATT025573.2	80.1139	146.146	14.0818	0.0963544	-3.37551	0.0138969	0.652871	Down	7.24425	0.667261	7:12314912:12315331:+	37717615	1
NONRATT025662.2	18.6081	0	37.2162	Inf	Inf	0.0228945	0.839506	Up	7.03637e-44	2.15864	7:24584401:24584742:+	37771220	1
NONRATT025664.2	36.1929	2.98257	69.4032	23.2696	4.54037	0.0215882	0.817418	Up	0.0687935	1.59871	7:24633245:24634097:+	37772663	1
NONRATT025675.2	15.4099	30.8199	0	0	#NAME?	0.0377142	1	Down	0.359665	2.88872e-21	7:26302586:26306072:+	37781476	3
NONRATT025726.2	22.6315	0	45.263	Inf	Inf	0.0127447	0.633112	Up	5.25541e-30	1.59402	7:34077655:34078219:+	37814175	1
NONRATT025882.2	79.6634	137.198	22.1286	0.161289	-2.63228	0.04663	1	Down	1.86424	0.2812	7:70790910:70805241:+	37913839	7
NONRATT025884.2	99.5763	171.995	27.1578	0.157899	-2.66293	0.030633	0.959811	Down	8.7185	1.31376	7:70814414:70815270:+	37914249	4
NONRATT025888.2	19.3867	38.7734	0	0	#NAME?	0.0206988	0.798939	Down	2.58163	2.41986e-26	7:71789891:71790207:+	37915938	1
NONRATT025981.2	1441.43	590.549	2292.32	3.88167	1.95668	0.0125359	0.63279	Up	12.5157	46.124	7:99961633:99962613:+	37968178	1
NONRATT026053.2	15.4099	30.8199	0	0	#NAME?	0.0377142	1	Down	1.1051	5.1152e-11	7:117417693:117419039:+	38016246	2
NONRATT026075.2	76.6109	143.163	10.0584	0.0702584	-3.83118	0.00745831	0.463947	Down	4.4461	0.300253	7:117764319:117765902:+	38027008	4
NONRATT026117.2	18.1052	0	36.2104	Inf	Inf	0.0246773	0.86613	Up	0.00628818	1.65516	7:120893990:120897681:+	38054082	4
NONRATT026216.2	224.765	6.95933	442.571	63.5939	5.99082	8.50239e-07	0.000408525	Up	0.112116	6.53127	7:129862033:129863445:+	38123375	2
NONRATT026358.2	28.1636	0	56.3272	Inf	Inf	0.00614073	0.425696	Up	2.75101e-14	2.52203	7:144868590:144871591:+	38292609	4
NONRATT026407.2	230.978	405.63	56.3272	0.138864	-2.84826	0.00461467	0.369545	Down	19.8188	2.61379	7:3340847:3341953:-	38318871	2
NONRATT026594.2	72.8829	6.95933	138.806	19.9454	4.31798	0.00407328	0.339862	Up	0.572483	10.3205	7:18333247:18333512:-	38438099	1
NONRATT026609.2	1473.87	719.794	2227.94	3.09525	1.63006	0.035446	1	Up	3.73387	10.9649	7:23543123:23548539:-	38450201	3
NONRATT026658.2	41.756	83.512	0	0	#NAME?	0.00120077	0.134932	Down	6.64542	9.90078e-12	7:30073927:30076161:-	38481147	3
NONRATT026800.2	21.3751	42.7502	0	0	#NAME?	0.0154849	0.69441	Down	1.14489	5.52884e-05	7:64332750:64341149:-	38570986	4
NONRATT026808.2	19.3867	38.7734	0	0	#NAME?	0.0206988	0.798939	Down	0.356397	0.000733307	7:66017082:66056905:-	38578800	2
NONRATT026818.2	21.878	42.7502	1.00584	0.0235284	-5.40945	0.0359685	1	Down	0.383578	0.00939851	7:70351819:70355576:-	38586783	6
NONRATT026844.2	14.4158	28.8315	0	0	#NAME?	0.0440169	1	Down	1.56786	5.42638e-12	7:70916400:70926613:-	38602684	3
NONRATT026872.2	33.1812	1.98838	64.374	32.3751	5.01681	0.0179955	0.756981	Up	0.0365911	1.43554	7:75413876:75419012:-	38618466	6
NONRATT026884.2	17.8954	35.7908	0	0	#NAME?	0.0258273	0.886399	Down	2.29955	6.49717e-08	7:76793088:76794841:-	38630164	2
NONRATT026974.2	14.4158	28.8315	0	0	#NAME?	0.0440169	1	Down	0.791554	1.70365e-37	7:99627905:99628654:-	38679672	1
NONRATT027046.2	74.9354	0	149.871	Inf	Inf	3.0334e-05	0.00768499	Up	0.00364935	4.23704	7:117181980:117185484:-	38720824	5
NONRATT027106.2	27.8373	55.6747	0	0	#NAME?	0.00651829	0.433327	Down	1.41622	5.13653e-18	7:120375555:120376366:-	38756169	1
NONRATT027150.2	14.5847	0	29.1695	Inf	Inf	0.0423347	1	Up	1.74763e-30	1.6756	7:122957488:122967180:-	38776655	3
NONRATT027229.2	15.5906	0	31.1812	Inf	Inf	0.0361912	1	Up	1.8848e-26	1.42362	7:130145594:130146350:-	38834894	2
NONRATT027246.2	34.8083	67.6049	2.01169	0.0297565	-5.07065	0.0154989	0.69441	Down	2.01269	0.0524076	7:130449049:130450243:-	38843508	4
NONRATT027247.2	23.8606	47.7211	0	0	#NAME?	0.0109361	0.582884	Down	2.47487	1.20922e-23	7:130450538:130450939:-	38843909	1
NONRATT027470.2	17.3983	34.7967	0	0	#NAME?	0.0278127	0.916176	Down	1.18927	4.48443e-30	8:21637561:21638169:+	39019666	1
NONRATT027621.2	147.853	258.489	37.2162	0.143976	-2.7961	0.0119284	0.611065	Down	5.63914	0.763174	8:48658100:48663015:+	39114639	5
NONRATT027677.2	32.6899	0	65.3798	Inf	Inf	0.00348479	0.301396	Up	1.46747e-24	2.64682	8:55179863:55182545:+	39146526	3
NONRATT027849.2	40.7367	0	81.4733	Inf	Inf	0.00132197	0.145042	Up	3.76241e-07	0.725878	8:76864339:76875889:-	39841003	6
NONRATT027878.2	178.537	0	357.075	Inf	Inf	1.22097e-08	1.54664e-05	Up	0.00100469	15.221	8:81963660:81968607:+	39292212	2
NONRATT027949.2	862.792	1668.25	57.3331	0.0343672	-4.86282	1.37448e-07	0.0001197	Down	41.6946	1.36644	8:103338860:103339691:+	39336058	1
NONRATT027989.2	13.9187	27.8373	0	0	#NAME?	0.0475431	1	Down	0.856826	3.33928e-14	8:111870099:111870781:+	39362343	1
NONRATT028102.2	44.2415	88.4829	0	0	#NAME?	0.000901003	0.114133	Down	1.23476	1.3871e-16	8:119529894:119531389:+	39423773	1
NONRATT028302.2	73.4266	0	146.853	Inf	Inf	3.54109e-05	0.00837424	Up	2.00537e-06	0.972897	8:21511832:21514800:-	39552064	1
NONRATT028317.2	58.1601	116.32	0	0	#NAME?	0.000187404	0.0313237	Down	6.21092	2.246e-05	8:22125468:22125932:-	39560029	2
NONRATT028406.2	41.756	83.512	0	0	#NAME?	0.00120077	0.134932	Down	6.64231	0	8:36770452:36772193:-	39609061	2
NONRATT028410.2	2077.49	3188.37	966.616	0.303169	-1.7218	0.0252542	0.877536	Down	82.3906	23.6989	8:37704340:38154319:-	39611342	2
NONRATT028472.2	32.8083	65.6166	0	0	#NAME?	0.0035041	0.301396	Down	2.32887	2.57276e-08	8:48729690:48731318:-	39661494	4
NONRATT028553.2	23.3635	46.7269	0	0	#NAME?	0.0117034	0.610852	Down	0.589304	1.10533e-06	8:55308760:55310390:-	39712250	1
NONRATT028569.2	20.1169	0	40.2337	Inf	Inf	0.0183079	0.756981	Up	2.86277e-23	1.64415	8:58110942:58117132:-	39724755	4
NONRATT028572.2	28.6665	0	57.3331	Inf	Inf	0.00576308	0.416076	Up	0.000173866	1.39631	8:58167406:58168982:-	39727533	2
NONRATT028574.2	15.907	31.8141	0	0	#NAME?	0.0349181	1	Down	2.80489	0	8:58213280:58213516:-	39729337	1
NONRATT028578.2	50.7037	101.407	0	0	#NAME?	0.000432585	0.0655178	Down	1.27767	4.261e-07	8:58932576:58935355:-	39733733	2
NONRATT028589.2	300.51	126.262	474.758	3.7601	1.91077	0.0376683	1	Up	3.29102	11.6894	8:59782719:59819366:-	39738146	4
NONRATT028740.2	26.8431	53.6863	0	0	#NAME?	0.00739573	0.463947	Down	1.21397	0	8:77016901:77020339:+	39260365	4
NONRATT028833.2	169.509	339.019	0	0	#NAME?	2.19333e-08	2.54682e-05	Down	4.81491	0.000297691	8:93323802:93349109:-	39900917	7
NONRATT028893.2	44.2571	0	88.5142	Inf	Inf	0.000878037	0.112244	Up	2.53184e-29	3.20393	8:104841901:104912539:-	39943625	2
NONRATT028895.2	16.9012	33.8025	0	0	#NAME?	0.0299795	0.953732	Down	0.541628	3.4617e-17	8:104965496:104974122:-	39949413	5
NONRATT028908.2	31.317	62.634	0	0	#NAME?	0.00421436	0.343409	Down	0.896952	6.4514e-16	8:109482587:109484035:-	39957635	1
NONRATT029036.2	25.1461	0	50.2922	Inf	Inf	0.00905422	0.514945	Up	0	2.8051	8:119515858:119523739:-	40031834	4
NONRATT029116.2	71.0846	142.169	0	0	#NAME?	4.66308e-05	0.0099962	Down	6.66169	3.99155e-06	8:132896956:132911196:-	40084035	4
NONRATT029305.2	24.8606	48.7153	1.00584	0.0206474	-5.5979	0.0248582	0.869237	Down	1.76801	0.0182666	9:40922306:40922881:+	40199369	1
NONRATT029312.2	22.1286	0	44.2571	Inf	Inf	0.0136833	0.648512	Up	0	1.31871	9:42886069:42886725:+	40202639	1
NONRATT029392.2	41.756	83.512	0	0	#NAME?	0.00120077	0.134932	Down	2.54457	1.90068e-09	9:61739631:61742965:+	40246844	3
NONRATT029454.2	19.3867	38.7734	0	0	#NAME?	0.0206988	0.798939	Down	0.84396	1.43799e-08	9:69611126:69612091:+	40292839	1
NONRATT029487.2	32.6899	0	65.3798	Inf	Inf	0.00348479	0.301396	Up	3.12523e-27	3.79982	9:80002930:80003613:+	40327403	2
NONRATT029589.2	59.772	12.9245	106.619	8.24942	3.04429	0.0417778	1	Up	0.848362	6.69318	9:91177875:91284595:+	40378985	2
NONRATT029606.2	3052.22	4721.41	1383.04	0.292928	-1.77138	0.0212965	0.808569	Down	40.9371	11.3805	9:93068061:93070457:+	40389854	1
NONRATT029686.2	186.772	53.6863	319.858	5.95792	2.57481	0.0133306	0.648512	Up	2.61776	14.7788	9:100624877:100645746:+	40439739	5
NONRATT029727.2	23.1344	0	46.2688	Inf	Inf	0.0118804	0.610852	Up	4.92889e-44	3.46678	9:114615614:114615875:+	40458905	1
NONRATT029889.2	855.683	392.705	1318.66	3.35789	1.74756	0.0293945	0.943738	Up	14.0418	44.7511	9:37227907:37231141:-	40556547	2
NONRATT029895.2	169.211	46.7269	291.695	6.24254	2.64213	0.0133609	0.648512	Up	1.126	6.72768	9:37903250:37904724:-	40560175	2
NONRATT030022.2	16.5964	0	33.1928	Inf	Inf	0.0309787	0.959811	Up	0.00134843	0.919107	9:61610772:61612696:-	40641692	4
NONRATT030110.2	20.6198	0	41.2396	Inf	Inf	0.0170074	0.729172	Up	0.00674553	1.63326	9:74506437:74506935:+	40322601	1
NONRATT030154.2	45.7659	0	91.5318	Inf	Inf	0.000738716	0.0989738	Up	8.27357e-23	5.97316	9:81233469:81258826:-	40739971	2
NONRATT030212.2	135.21	270.42	0	0	#NAME?	2.01111e-07	0.000147489	Down	7.60757	8.74071e-07	9:86046205:86048955:-	40774341	2
NONRATT030247.2	137.801	0	275.601	Inf	Inf	1.60452e-07	0.000131514	Up	0	6.60954	9:93371671:93374520:-	40796378	6
NONRATT030253.2	16.5964	0	33.1928	Inf	Inf	0.0309787	0.959811	Up	3.11215e-10	0.36335	9:94569286:94579807:-	40801624	9
NONRATT030291.2	22.3693	44.7386	0	0	#NAME?	0.0134411	0.648512	Down	1.1652	0.0066949	9:98550638:98551429:-	40821802	1
NONRATT030354.2	102.899	205.797	0	0	#NAME?	2.32236e-06	0.000947395	Down	5.42348	0	9:113300831:113301619:-	40871052	1
NONRATT030406.2	85.4967	0	170.993	Inf	Inf	1.06776e-05	0.00362881	Up	1.28446e-05	6.97719	X:1314696:1316683:+	40904136	2
NONRATT030453.2	39.2279	0	78.4558	Inf	Inf	0.00157959	0.168016	Up	6.10855e-26	1.42917	X:15616599:15617677:+	40932823	1
NONRATT030513.2	41.2396	0	82.4792	Inf	Inf	0.00124625	0.138922	Up	0	6.97046	X:33786688:33786921:+	40978614	1
NONRATT030526.2	196.328	53.6863	338.969	6.31389	2.65853	0.0100272	0.554441	Up	0.979994	5.83284	X:43626608:43629765:+	40988746	7
NONRATT030592.2	79.4034	9.9419	148.865	14.9735	3.90434	0.00595708	0.425672	Up	0.567971	7.93507	X:71540963:71544044:+	41020571	2
NONRATT030722.2	15.0877	0	30.1753	Inf	Inf	0.0391408	1	Up	6.99802e-20	0.797617	7:140980652:140981580:+	38244013	2
NONRATT030768.2	62.304	9.9419	114.666	11.5336	3.52777	0.0197758	0.78506	Up	0.20966	2.34361	X:123406343:123407643:+	41116164	2
NONRATT030782.2	34.1987	0	68.3974	Inf	Inf	0.00289463	0.262395	Up	9.1842e-10	2.06263	X:124895772:124906125:+	41121155	5
NONRATT030877.2	39.288	75.5585	3.01753	0.0399364	-4.64615	0.0163557	0.71893	Down	0.699418	0.0240939	X:14633341:14636186:-	41199852	2
NONRATT030931.2	49.7095	99.419	0	0	#NAME?	0.000484118	0.0710074	Down	3.92673	1.17361e-07	X:21559029:21560395:+	40949602	3
NONRATT031007.2	23.8606	47.7211	0	0	#NAME?	0.0109361	0.582884	Down	2.75959	8.98418e-23	X:77298902:77299261:-	41333136	1
NONRATT031119.2	29.1695	0	58.3389	Inf	Inf	0.00540958	0.400942	Up	0.000673519	2.93433	X:84766915:84821762:-	41346587	4
NONRATT031359.1	243.897	432.473	55.3214	0.127919	-2.9667	0.00300242	0.268178	Down	13.0703	1.58439	1:41594111:41594799:+	41496610	1
NONRATT031468.1	24.3577	48.7153	0	0	#NAME?	0.0102281	0.561096	Down	0.275622	3.17998e-05	1:11982256:11995787:-	41592615	6
NONRATT031710.1	63.1952	115.326	11.0643	0.0959391	-3.38174	0.0235825	0.850756	Down	0.64476	0.0572793	10:67107926:67128049:-	41811234	2
NONRATT032021.1	143.332	257.495	29.1695	0.113282	-3.14201	0.00585607	0.420611	Down	23.068	2.4732	14:60060071:60069864:-	42076464	2
NONRATT032802.1	31.317	62.634	0	0	#NAME?	0.00421436	0.343409	Down	3.428	5.7999e-08	20:45681158:45684630:+	42679864	3
NONRATT033272.1	14.5847	0	29.1695	Inf	Inf	0.0423347	1	Up	0	0.395484	5:142405309:142407701:-	43037978	2
NONRATT033657.1	337.396	525.927	148.865	0.283053	-1.82086	0.0426461	1	Down	2.91142	0.781595	8:38418273:38422399:-	43339433	2
TCONS_00000036	48.2805	0	96.561	Inf	Inf	0.000554995	0.0781142	Up	0.0176211	4.61552	1:11962868:12009248:+	412	2	XLOC_000022	ENSRNOT00000074325	o
TCONS_00000040	499.362	92.4597	906.265	9.80173	3.29304	0.000254221	0.0398013	Up	4.76996	44.3203	1:11962889:12009248:+	403	2	XLOC_000022	ENSRNOT00000074325	o
TCONS_00000041	4011.78	1807.44	6216.11	3.43919	1.78207	0.0211751	0.806708	Up	95.805	312.671	1:11962890:12009251:+	392	2	XLOC_000022	ENSRNOT00000074325	o
TCONS_00000309	49.7893	0	99.5785	Inf	Inf	0.000467546	0.0693063	Up	7.65845e-10	3.37019	1:72717405:72784058:+	580	2	XLOC_000155	ENSRNOT00000024400	o
TCONS_00000408	230.885	421.537	40.2337	0.0954454	-3.38918	0.00103005	0.122673	Down	30.6176	2.74769	1:83162988:83360156:+	286	2	XLOC_000225	ENSRNOT00000034845	o
TCONS_00001349	11820.2	4621.99	19018.5	4.11478	2.04082	0.0147572	0.672483	Up	459.431	1794.28	1:243193462:243283679:+	209	2	XLOC_000732	ENSRNOT00000021496	o
TCONS_00001352	11707.6	19470.2	3944.92	0.202613	-2.3032	0.00635093	0.432943	Down	1935.32	372.219	1:243234488:243283679:+	209	3	XLOC_000732	ENSRNOT00000021496	o
TCONS_00001421	32.187	0	64.374	Inf	Inf	0.00370866	0.316547	Up	4.66198e-05	1.10339	1:252880956:252900728:+	1148	2	XLOC_000755	ENSRNOT00000054757	o
TCONS_00002161	80.1197	145.152	15.0877	0.103944	-3.26612	0.0166279	0.719941	Down	2.9829	0.294796	1:90200795:90279664:-	1011	2	XLOC_001123	ENSRNOT00000030186	o
TCONS_00002163	106.619	0	213.239	Inf	Inf	1.63666e-06	0.000691067	Up	3.38964e-10	4.63262	1:90200872:90251548:-	909	2	XLOC_001123	ENSRNOT00000030186	o
TCONS_00003530	42.2647	82.5178	2.01169	0.0243788	-5.35823	0.00724748	0.463947	Down	1.2117	0.03353	10:10717042:10761280:+	1413	2	XLOC_001762	ENSRNOT00000004159	o
TCONS_00004549	79.541	158.076	1.00584	0.00636303	-7.29607	8.08553e-05	0.0163281	Down	2.69193	0.0163337	10:7091233:7092494:-	1218	2	XLOC_002301		u
TCONS_00004552	99.5064	183.925	15.0877	0.0820315	-3.60768	0.00532943	0.400942	Down	3.13453	0.247816	10:7091240:7092594:-	1219	3	XLOC_002301		u
TCONS_00004724	313.351	595.52	31.1812	0.0523595	-4.2554	2.9423e-05	0.00759222	Down	28.1809	1.39183	10:29301060:29393173:-	439	2	XLOC_002391	ENSRNOT00000005304	o
TCONS_00006154	469.08	24.8548	913.306	36.7457	5.1995	2.32825e-07	0.000162209	Up	0.231903	8.10552	11:61458195:61511259:-	2221	3	XLOC_003144	ENSRNOT00000046208	o
TCONS_00006158	51.298	0	102.596	Inf	Inf	0.000393973	0.0603255	Up	8.86671e-06	0.655412	11:61463098:61511254:-	3093	2	XLOC_003144	ENSRNOT00000046208	o
TCONS_00006378	47.259	88.4829	6.03506	0.068206	-3.87396	0.0236898	0.850756	Down	1.96561	0.12087	11:81721911:81732910:-	938	3	XLOC_003212	ENSRNOT00000078203	i
TCONS_00006538	510.424	779.445	241.402	0.309711	-1.69101	0.0445359	1	Down	71.9863	21.1599	12:10291879:10328676:+	225	3	XLOC_003282	ENSRNOT00000092627	x
TCONS_00006540	1788.7	3121.76	455.647	0.145959	-2.77637	0.000541083	0.0770417	Down	279.503	38.7632	12:10291879:10364808:+	232	3	XLOC_003282	ENSRNOT00000092627	x
TCONS_00006544	1843.93	3395.16	292.701	0.0862111	-3.53598	2.01326e-05	0.00572505	Down	304.052	24.8635	12:10298687:10382311:+	232	3	XLOC_003282	ENSRNOT00000092627	x
TCONS_00006690	93.4269	19.8838	166.97	8.39729	3.06992	0.0166178	0.719941	Up	0.605415	4.88776	12:24733463:24745885:+	673	2	XLOC_003368		u
TCONS_00006977	21542.1	33640.4	9443.87	0.28073	-1.83275	0.0414565	1	Down	3191.11	850.336	12:10267506:10342095:-	219	3	XLOC_003512	ENSRNOT00000071567	o
TCONS_00007462	188.176	71.5817	304.771	4.25766	2.09006	0.0401438	1	Up	1.38343	5.60353	13:48697355:48709662:+	1074	2	XLOC_003749	ENSRNOT00000075674	o
TCONS_00008546	2004.79	576.63	3432.94	5.95346	2.57373	0.00118365	0.134932	Up	20.2112	114.144	14:46633705:46656265:+	593	3	XLOC_004267	ENSRNOT00000085875	o
TCONS_00008696	415.464	163.047	667.88	4.09624	2.0343	0.0201274	0.79449	Up	5.62298	21.9027	14:84212629:84292381:+	601	3	XLOC_004338	ENSRNOT00000005996	o
TCONS_00009795	14.4158	28.8315	0	0	#NAME?	0.0440169	1	Down	0.935606	0	15:32404980:32426061:-	646	3	XLOC_004891	ENSRNOT00000066351	o
TCONS_00010017	224.147	369.839	78.4558	0.212135	-2.23694	0.0232363	0.845366	Down	2.9561	0.598101	15:59640453:59666893:-	2597	5	XLOC_004994		u
TCONS_00010486	91.023	0.99419	181.052	182.11	7.50867	2.76426e-05	0.00726739	Up	0.0105191	1.49826	16:83954301:83957286:+	2389	2	XLOC_005234		u
TCONS_00010622	1127.13	330.071	1924.18	5.82959	2.54339	0.00170597	0.177395	Up	19.6419	108.702	16:20457849:20492314:-	349	3	XLOC_005314	ENSRNOT00000026457	o
TCONS_00011444	887.309	402.647	1371.97	3.40738	1.76866	0.0271832	0.916176	Up	6.63925	21.4486	17:13078359:13083584:-	1261	3	XLOC_005706		u
TCONS_00011532	261.519	0	523.039	Inf	Inf	1.87039e-10	6.51549e-07	Up	0	2.82273	17:29531527:29539533:-	3654	3	XLOC_005756	ENSRNOT00000072056	i
TCONS_00011730	1416.31	672.073	2160.55	3.21476	1.68471	0.0302578	0.959811	Up	8.98654	27.4342	17:57976274:57982387:-	1553	2	XLOC_005834	ENSRNOT00000022389	o
TCONS_00011960	45.7542	1.98838	89.5201	45.0216	5.49255	0.005	0.387056	Up	0.0101616	0.482672	18:14994057:15036574:+	3661	2	XLOC_005921		u
TCONS_00011962	222.936	61.6398	384.232	6.23351	2.64004	0.00850667	0.49595	Up	1.85371	10.977	18:15032556:15068159:+	690	2	XLOC_005923	ENSRNOT00000074116	x
TCONS_00012555	25.3519	50.7037	0	0	#NAME?	0.00896751	0.514945	Down	1.22735	7.62609e-19	18:55362063:55389802:-	856	3	XLOC_006209		u
TCONS_00012566	36.3171	67.6049	5.02922	0.0743913	-3.74872	0.0445398	1	Down	1.42163	0.109658	18:56363296:56370696:-	987	3	XLOC_006214	ENSRNOT00000068535	x
TCONS_00012596	28.1636	0	56.3272	Inf	Inf	0.00614073	0.425696	Up	5.15589e-05	0.832862	18:60619920:60626958:-	1327	4	XLOC_006231	ENSRNOT00000023890	i
TCONS_00013256	71.1603	129.245	13.076	0.101172	-3.30512	0.0203627	0.798939	Down	1.40211	0.134217	19:31100988:31110449:-	1913	2	XLOC_006558		u
TCONS_00013452	134.567	36.785	232.35	6.31642	2.65911	0.0188043	0.770643	Up	0.491326	2.91695	19:59752952:59776193:-	1573	2	XLOC_006669		u
TCONS_00014061	119.419	218.722	20.1169	0.0919747	-3.44262	0.00464633	0.369954	Down	7.95019	0.682286	2:194993483:194994154:+	572	2	XLOC_006986		u
TCONS_00014063	57.7213	105.384	10.0584	0.0954454	-3.38918	0.0282436	0.917357	Down	1.67131	0.151244	2:195005166:195007038:+	1311	2	XLOC_006987		u
TCONS_00014086	126.425	224.687	28.1636	0.125346	-2.99601	0.0104261	0.567488	Down	3.25648	0.393368	2:196574679:196585713:+	1435	5	XLOC_007002	ENSRNOT00000081672	x
TCONS_00014281	22.1227	0.99419	43.2513	43.504	5.44308	0.0343062	1	Up	0.00761708	0.295966	2:220519611:220529935:+	2878	3	XLOC_007089	ENSRNOT00000089082	x
TCONS_00014484	26.8431	53.6863	0	0	#NAME?	0.00739573	0.463947	Down	2.06101	0	2:22812845:22819710:-	545	4	XLOC_007197		u
TCONS_00015519	23.1344	0	46.2688	Inf	Inf	0.0118804	0.610852	Up	2.96344e-27	3.06937	20:3665677:3677847:+	300	3	XLOC_007674	ENSRNOT00000047663	o
TCONS_00015851	37.288	73.5701	1.00584	0.0136719	-6.19264	0.00605256	0.425696	Down	1.38365	0.0207337	20:46300151:46306002:+	1108	3	XLOC_007849	ENSRNOT00000000340	x
TCONS_00016563	78.5993	147.14	10.0584	0.0683596	-3.87071	0.00650788	0.433327	Down	5.04632	0.315504	3:35904196:36035489:+	607	3	XLOC_008169		u
TCONS_00016564	240.054	401.653	78.4558	0.195332	-2.356	0.0158134	0.697289	Down	1.98482	0.365826	3:35904319:36057243:+	4202	3	XLOC_008169		u
TCONS_00016942	258.231	475.223	41.2396	0.0867795	-3.5265	0.000520082	0.0754877	Down	26.3252	2.18809	3:114276792:114379582:+	375	3	XLOC_008343	ENSRNOT00000046843	o
TCONS_00017724	71.0846	142.169	0	0	#NAME?	4.66308e-05	0.0099962	Down	11.6514	7.96826e-10	3:61869589:61936760:-	254	2	XLOC_008742		u
TCONS_00018512	48.7153	97.4306	0	0	#NAME?	0.000541847	0.0770417	Down	1.01512	1.46878e-16	4:30535097:30544832:+	1994	4	XLOC_009132		u
TCONS_00018513	68.5991	137.198	0	0	#NAME?	6.05092e-05	0.0125841	Down	1.28754	0.000343413	4:30535097:30544832:+	2207	4	XLOC_009132		u
TCONS_00018515	33.3054	66.6107	0	0	#NAME?	0.00329636	0.288878	Down	0.650757	2.15346e-17	4:30535109:30544832:+	2142	5	XLOC_009132		u
TCONS_00018888	106.407	207.786	5.02922	0.0242039	-5.36862	0.00016399	0.0296759	Down	1.50376	0.0334607	4:122916870:122931408:+	2870	5	XLOC_009326		u
TCONS_00019500	1064.61	355.92	1773.3	4.9823	2.31681	0.00406061	0.339862	Up	7.66585	36.2696	4:66322526:66342157:-	964	4	XLOC_009596	ENSRNOT00000035326	o
TCONS_00020104	197.211	332.06	62.3623	0.187805	-2.4127	0.0180941	0.756981	Down	2.7544	0.493871	4:179888877:179893930:-	2506	2	XLOC_009867	ENSRNOT00000085386	i
TCONS_00021170	34.2996	68.5991	0	0	#NAME?	0.00291885	0.262395	Down	2.39229	2.55923e-07	5:50119899:50139403:-	595	2	XLOC_010395	ENSRNOT00000081150	o
TCONS_00022568	43.7793	81.5236	6.03506	0.0740284	-3.75578	0.0315011	0.971986	Down	2.66556	0.186677	6:123486347:123490716:+	634	2	XLOC_011034	ENSRNOT00000006604	i
TCONS_00023087	1552.48	692.951	2412.01	3.48079	1.79941	0.020642	0.798939	Up	30.8187	101.832	6:95384146:95465919:-	467	2	XLOC_011289	ENSRNOT00000074990	o
TCONS_00023284	22.1286	0	44.2571	Inf	Inf	0.0136833	0.648512	Up	0	3.59172	6:128062668:128080900:-	245	2	XLOC_011392	ENSRNOT00000084685	x
TCONS_00023956	64.1253	128.251	0	0	#NAME?	9.75556e-05	0.0189379	Down	2.37916	1.06745e-08	7:123436281:123438607:+	1124	2	XLOC_011747	ENSRNOT00000082603	o
TCONS_00025251	158.883	6.95933	310.806	44.6603	5.48092	1.86151e-05	0.0055188	Up	0.544119	24.6209	8:27779298:27824923:+	249	2	XLOC_012346	ENSRNOT00000009825	o
TCONS_00026280	72.1604	130.239	14.0818	0.108123	-3.20926	0.0228688	0.839506	Down	1.33942	0.132895	8:66310490:66313373:-	2019	2	XLOC_012858	ENSRNOT00000018467	i
TCONS_00026497	251.352	104.39	398.314	3.81564	1.93192	0.0423927	1	Up	8.6035	31.0488	8:112926856:112958930:-	253	2	XLOC_012970		u
TCONS_00027887	25.1461	0	50.2922	Inf	Inf	0.00905422	0.514945	Up	2.65076e-12	0.722119	X:14570702:14612577:+	1381	3	XLOC_013684	ENSRNOT00000038994	o

## Sheet: 6h vs 0h
id	baseMean	baseMean_control_0h	baseMean_case_6h	foldChange	log2FoldChange	pval	padj	up_down	expression_0h	expression_6h	locus	length	exon_count	gene_id	nearest_ref	class_code
NONRATT000007.2	83	8	158	19.75	4.30378	0.0120065	0.654357	Up	0.149072	2.82192	1:1901580:1928246:+	21479469	10
NONRATT000056.2	66	2	130	65	6.02237	0.00348686	0.336115	Up	0.0496364	3.55065	1:15820516:15826630:+	21511020	3
NONRATT000094.2	180	41	319	7.78049	2.95986	0.0281537	0.999721	Up	0.542064	4.17429	1:22758414:22760365:+	21537523	2
NONRATT000168.2	133.5	267	0	0	#NAME?	1.56593e-05	0.00737311	Down	8.85222	0.0047973	1:46983328:46983952:+	21584455	1
NONRATT000240.2	27	0	54	Inf	Inf	0.01345	0.693043	Up	6.24415e-27	2.45637	1:56997310:57001664:+	21623565	4
NONRATT000247.2	23.5	0	47	Inf	Inf	0.019621	0.822402	Up	7.37609e-22	2.60964	1:59145190:59146455:+	21627744	2
NONRATT000274.2	893	1494	292	0.195448	-2.35514	0.0276278	0.993366	Down	91.0202	17.4124	1:64534652:64534991:+	21648650	1
NONRATT000341.2	28	56	0	0	#NAME?	0.0121066	0.654771	Down	2.30374	3.65975e-18	1:73656038:73659710:-	22879485	3
NONRATT000460.2	46	0	92	Inf	Inf	0.00242416	0.279271	Up	4.8167e-31	6.45734	1:81328169:81332405:+	21739316	3
NONRATT000461.2	19.5	39	0	0	#NAME?	0.0309673	1	Down	2.62873	0	1:81370323:81370630:+	21739623	1
NONRATT000501.2	213	426	0	0	#NAME?	9.19956e-07	0.00108199	Down	17.3943	6.36872e-08	1:83946289:83947804:+	21762157	2
NONRATT000555.2	47.5	1	94	94	6.55459	0.00599625	0.435727	Up	0.0181473	1.93787	1:86877724:86878707:+	21789613	1
NONRATT000603.2	231	429	33	0.0769231	-3.70044	0.00563642	0.424312	Down	9.17138	0.682241	1:91365197:91366164:+	21816710	1
NONRATT000891.2	36.5	73	0	0	#NAME?	0.00529615	0.41009	Down	2.52787	7.57061e-15	X:156319780:156321939:+	41151899	2
NONRATT000919.2	25	50	0	0	#NAME?	0.0166539	0.774096	Down	1.68299	2.01364e-18	X:157125774:157126391:+	41168509	1
NONRATT000927.2	18	36	0	0	#NAME?	0.0367726	1	Down	1.18685	3.83145e-18	1:147830592:147900194:+	21987498	2
NONRATT001063.2	637.5	1073	202	0.188257	-2.40922	0.0287133	0.999721	Down	3.76566	0.695878	1:169752034:169757918:+	22083873	1
NONRATT001137.2	17.5	0	35	Inf	Inf	0.0389081	1	Up	1.82742e-22	0.31891	1:188436786:188444995:+	22132435	6
NONRATT001403.2	406.5	699	114	0.16309	-2.61626	0.0251145	0.964424	Down	25.7059	4.08817	1:219330187:219335054:+	22285224	3
NONRATT001406.2	179.5	324	35	0.108025	-3.21057	0.0186674	0.793288	Down	16.7521	1.74842	1:219346591:219347703:+	22286883	3
NONRATT001448.2	25.5	0	51	Inf	Inf	0.0157824	0.752984	Up	0.000421914	0.657508	1:220950797:220952357:+	22313501	1
NONRATT001499.2	106	20	192	9.6	3.26303	0.0321965	1	Up	0.343807	3.19544	1:224921323:224923782:+	22343963	6
NONRATT001624.2	34.5	67	2	0.0298507	-5.06609	0.0288839	0.999721	Down	1.89484	0.0452883	1:242946970:242949066:+	22427385	2
NONRATT001672.2	178	342	14	0.0409357	-4.6105	0.00174331	0.22457	Down	18.1838	0.75041	1:250426188:250438681:+	22462417	2
NONRATT001695.2	21.5	43	0	0	#NAME?	0.0246002	0.949821	Down	3.14566	0	1:255422190:255422595:+	22481087	2
NONRATT001733.2	18	0	36	Inf	Inf	0.0367726	1	Up	1.51463e-49	2.80664	1:261308687:261308943:+	22501216	1
NONRATT001738.2	43	2	84	42	5.39232	0.0153753	0.746125	Up	0.041878	2.18313	1:261391307:261392082:+	22505085	1
NONRATT001742.2	343.5	0	687	Inf	Inf	3.62411e-08	0.000128384	Up	9.11994e-09	7.87919	1:261434057:261435821:+	22508836	1
NONRATT001930.2	34	0	68	Inf	Inf	0.00665521	0.472943	Up	2.97525e-06	1.79949	1:2000374:2001227:-	22637129	2
NONRATT002017.2	22	0	44	Inf	Inf	0.0232343	0.911993	Up	7.04278e-14	1.50617	1:24327314:24327902:-	22694298	1
NONRATT002038.2	428	707	149	0.21075	-2.2464	0.0495592	1	Down	4.73556	0.974629	1:31866754:31869837:-	22712979	1
NONRATT002071.2	67.5	1	134	134	7.06609	0.00157392	0.212405	Up	0.00698332	1.79271	1:37802591:37819294:-	22734490	4
NONRATT002087.2	27.5	0	55	Inf	Inf	0.0127587	0.679662	Up	6.87549e-29	3.16254	1:37988340:38009451:-	22744677	4
NONRATT002358.2	28.5	0	57	Inf	Inf	0.0114916	0.636077	Up	1.49367e-20	0.998849	1:80335469:80336633:-	22906562	1
NONRATT002372.2	30	0	60	Inf	Inf	0.00984941	0.586413	Up	4.07208e-06	1.95514	1:80730796:80733423:-	22914594	2
NONRATT002402.2	25.5	51	0	0	#NAME?	0.0157824	0.752984	Down	1.42264	3.28754e-08	1:82115088:82115825:-	22932978	1
NONRATT002537.2	29	57	1	0.0175439	-5.83289	0.0266408	0.986818	Down	1.18239	0.0282499	1:89563981:89585622:-	23006101	8
NONRATT002687.2	49969	395	99543	252.008	7.97732	4.07725e-06	0.00262612	Up	20.6608	5095.91	1:102786004:102788504:-	23084912	3
NONRATT002761.2	62	3	121	40.3333	5.3339	0.00736866	0.494853	Up	0.101611	4.39276	1:134873405:134885529:-	23132742	4
NONRATT002816.2	17.5	35	0	0	#NAME?	0.0389081	1	Down	1.64299	8.84791e-15	1:142194049:142201199:-	23167256	2
NONRATT002857.2	57	114	0	0	#NAME?	0.00106564	0.164132	Down	2.14125	3.9982e-06	1:146746269:146812587:-	23194947	7
NONRATT002859.2	52	4	100	25	4.64386	0.019675	0.822402	Up	0.102238	2.69093	1:146748652:146823762:-	23196268	7
NONRATT002862.2	37.5	71	4	0.056338	-4.14975	0.0491879	1	Down	2.0757	0.126236	1:146748695:146823762:-	23198362	6
NONRATT002896.2	20	40	0	0	#NAME?	0.0292333	0.999721	Down	0.549946	1.54911e-19	X:157073859:157081220:-	41465138	4
NONRATT002950.2	19	0	38	Inf	Inf	0.0328011	1	Up	1.32728e-20	0.83909	1:163544840:163545765:-	23231706	1
NONRATT003019.2	117	234	0	0	#NAME?	3.25223e-05	0.0124552	Down	11.1286	3.18058e-11	1:168971268:168971702:-	23270396	1
NONRATT003031.2	1016.5	197	1836	9.3198	3.2203	0.00338282	0.330583	Up	4.635	42.3238	1:170424034:170424992:-	23274910	2
NONRATT003035.2	165.5	11	320	29.0909	4.8625	0.00134153	0.193975	Up	0.221775	6.38198	1:170464989:170466002:-	23276961	1
NONRATT003037.2	52.5	5	100	20	4.32193	0.0260779	0.972431	Up	0.147715	3.16314	1:170468870:170469510:-	23277601	1
NONRATT003071.2	34	65	3	0.0461538	-4.43741	0.045486	1	Down	3.56721	0.166005	1:180644622:180644998:-	23296267	1
NONRATT003172.2	54.5	0	109	Inf	Inf	0.00127762	0.188582	Up	9.31338e-09	3.84606	1:198116275:198117585:-	23375028	5
NONRATT003272.2	18	0	36	Inf	Inf	0.0367726	1	Up	1.56471e-23	1.03022	1:204714467:204715182:-	23440395	1
NONRATT003438.2	232	451	13	0.0288248	-5.11654	0.000393293	0.0862817	Down	24.2313	0.701252	1:219967306:219973958:-	23535887	2
NONRATT003452.2	26.5	53	0	0	#NAME?	0.0141829	0.720327	Down	2.12761	1.09796e-20	1:220862473:220863476:-	23540528	3
NONRATT003484.2	39.5	79	0	0	#NAME?	0.00408701	0.359708	Down	1.63714	1.04754e-17	1:221346080:221348944:-	23559104	4
NONRATT003648.2	740	255	1225	4.80392	2.26421	0.0362215	1	Up	9.66745	45.5406	1:240561951:240562495:-	23652223	1
NONRATT003682.2	310	63	557	8.84127	3.14425	0.011312	0.636077	Up	2.32055	20.2161	1:245476402:245482170:-	23670435	3
NONRATT003683.2	168	30	306	10.2	3.3505	0.0160509	0.763227	Up	0.828625	8.26075	1:245476402:245514262:-	23671184	5
NONRATT003723.2	32	0	64	Inf	Inf	0.00806573	0.514826	Up	2.36284e-07	0.80767	1:253119110:253122079:-	23701227	2
NONRATT003737.2	20	0	40	Inf	Inf	0.0292333	0.999721	Up	9.93328e-20	1.66558	1:255811762:255812249:-	23708221	1
NONRATT003860.2	18.5	37	0	0	#NAME?	0.0347368	1	Down	1.18809	1.54144e-18	1:266048832:266051081:-	23783138	2
NONRATT003894.2	17.5	35	0	0	#NAME?	0.0389081	1	Down	2.72965	0	1:267043734:267043996:-	23806754	1
NONRATT003957.2	16.5	0	33	Inf	Inf	0.0435293	1	Up	2.63186e-22	0.7053	1:281347512:281348468:-	23846665	1
NONRATT004035.2	31.5	63	0	0	#NAME?	0.00847311	0.526596	Down	1.4916	7.29937e-24	10:730264:750635:+	23854693	4
NONRATT004054.2	27	0	54	Inf	Inf	0.01345	0.693043	Up	0.0123401	2.67023	10:12994635:12995679:+	23910975	2
NONRATT004096.2	183.5	0	367	Inf	Inf	2.36519e-06	0.00197145	Up	1.23985e-08	14.7938	10:14257631:14258132:+	23932623	1
NONRATT004246.2	59.5	119	0	0	#NAME?	0.000891663	0.146917	Down	9.41528	7.38587e-16	10:37594594:37605642:+	24028053	3
NONRATT004279.2	127.5	0	255	Inf	Inf	2.02759e-05	0.00897844	Up	1.95705e-09	5.45613	10:39868992:39869938:+	24049038	1
NONRATT004298.2	58.5	8	109	13.625	3.76818	0.0385024	1	Up	0.734351	9.39425	10:42948557:42948791:+	24062031	1
NONRATT004309.2	41	0	82	Inf	Inf	0.00360803	0.338582	Up	9.06984e-10	2.23624	10:43487477:43489060:+	24067022	3
NONRATT004310.2	18	0	36	Inf	Inf	0.0367726	1	Up	1.34794e-20	1.54442	10:43496099:43496665:+	24067494	2
NONRATT004383.2	27	54	0	0	#NAME?	0.01345	0.693043	Down	0.957028	1.22447e-05	10:49307129:49310400:+	24118026	2
NONRATT004553.2	47	5	89	17.8	4.15381	0.0359831	1	Up	0.114891	2.16048	10:61755041:61756125:+	24228141	2
NONRATT004602.2	214	44	384	8.72727	3.12553	0.017642	0.792387	Up	1.31471	11.2261	10:66590031:66595678:-	25023551	5
NONRATT004603.2	156.5	32	281	8.78125	3.13443	0.0247486	0.952954	Up	0.908661	7.93004	10:66589768:66591085:-	25022860	3
NONRATT004628.2	1660.5	2905	416	0.143201	-2.80388	0.00792698	0.514826	Down	133.618	18.7225	10:64950847:64953915:-	25000093	2
NONRATT004640.2	24	0	48	Inf	Inf	0.0185655	0.792387	Up	1.60894e-27	3.68143	10:67525060:67525322:+	24292400	1
NONRATT004667.2	162	31	293	9.45161	3.24056	0.0200705	0.831577	Up	0.317733	2.97121	10:70689910:70721891:+	24322242	17
NONRATT004689.2	19	0	38	Inf	Inf	0.0328011	1	Up	4.22312e-15	2.04943	10:72282870:72283245:+	24334108	1
NONRATT004718.2	101.5	203	0	0	#NAME?	6.93928e-05	0.021851	Down	5.54722	0	10:74907576:74912833:-	25069652	2
NONRATT005081.2	1287.5	2122	453	0.213478	-2.22784	0.0325601	1	Down	41.6229	8.69027	10:103831798:103832851:-	25319469	1
NONRATT005096.2	22	44	0	0	#NAME?	0.0232343	0.911993	Down	1.60433	2.76454e-11	10:105787897:105792465:+	24600391	4
NONRATT005117.2	17.5	0	35	Inf	Inf	0.0389081	1	Up	1.55737e-26	1.31715	10:107025777:107030208:+	24614272	2
NONRATT005222.2	47	0	94	Inf	Inf	0.00224438	0.265023	Up	0.000353756	4.8034	10:11990579:11994459:-	24682936	5
NONRATT005378.2	112.5	0	225	Inf	Inf	4.01711e-05	0.0145955	Up	1.53423e-06	2.94437	10:34155517:34157064:-	24784364	1
NONRATT005389.2	104	207	1	0.00483092	-7.69349	0.000210756	0.0514899	Down	14.6731	0.0707873	10:35737593:35737885:-	24791365	1
NONRATT005391.2	47.5	1	94	94	6.55459	0.00599625	0.435727	Up	0.00411624	0.540626	10:35765708:35775683:-	24795427	4
NONRATT005424.2	23478.5	7242	39715	5.48398	2.45522	0.0415202	1	Up	374.853	2012.73	10:38773402:38774447:-	24812194	3
NONRATT005557.2	32.5	65	0	0	#NAME?	0.00768157	0.508634	Down	1.71499	1.15192e-12	10:55430432:55482483:-	24898035	5
NONRATT005600.2	40.5	0	81	Inf	Inf	0.0037599	0.34822	Up	3.77854e-06	2.23544	10:56527322:56531443:-	24924507	5
NONRATT005634.2	24.5	0	49	Inf	Inf	0.0175781	0.792387	Up	2.39762e-14	1.43842	10:57613879:57617820:-	24944162	4
NONRATT005673.2	377.5	114	641	5.62281	2.49129	0.0337928	1	Up	6.04627	33.2174	10:59887816:59888206:-	24966882	1
NONRATT005772.2	24.5	0	49	Inf	Inf	0.0175781	0.792387	Up	2.65626e-16	1.77763	10:67753080:67753637:-	25026477	1
NONRATT005784.2	17.5	0	35	Inf	Inf	0.0389081	1	Up	1.03668e-12	0.37789	10:70157529:70159381:-	25035976	1
NONRATT005842.2	19	0	38	Inf	Inf	0.0328011	1	Up	0.000117651	1.69424	10:75032377:75037887:+	24354485	6
NONRATT005847.2	23	46	0	0	#NAME?	0.0207484	0.849727	Down	1.84061	1.15619e-31	10:74883461:74884200:+	24349780	2
NONRATT005866.2	457.5	779	136	0.174583	-2.51802	0.0280656	0.999219	Down	14.1612	2.41395	10:77838375:77839511:-	25086426	1
NONRATT005949.2	56.5	0	113	Inf	Inf	0.00110474	0.168324	Up	0.0106296	3.3429	10:85096508:85099341:-	25136346	3
NONRATT006017.2	26	0	52	Inf	Inf	0.0149595	0.736029	Up	1.68886e-30	2.50909	10:88346990:88355711:-	25175579	6
NONRATT006021.2	28.5	57	0	0	#NAME?	0.0114916	0.636077	Down	3.02283	3.40859e-21	10:88433865:88434704:-	25181287	2
NONRATT006032.2	268.5	80	457	5.7125	2.51412	0.0417788	1	Up	2.45312	13.7281	10:88791855:88796598:-	25187495	4
NONRATT006034.2	223	40	406	10.15	3.34341	0.0113945	0.636077	Up	2.16955	21.4705	10:88793063:88797162:-	25188789	4
NONRATT006082.2	36.5	0	73	Inf	Inf	0.00529615	0.41009	Up	7.33969e-05	4.33532	10:90260896:90263205:-	25215115	3
NONRATT006212.2	222.5	47	398	8.46809	3.08204	0.0182449	0.792387	Up	0.538396	4.50651	10:97733700:97735485:-	25296103	1
NONRATT006242.2	150.5	301	0	0	#NAME?	7.84329e-06	0.00444558	Down	14.2177	2.02189e-05	10:102244679:102245116:-	25314134	1
NONRATT006307.2	52.5	7	98	14	3.80735	0.0428255	1	Up	0.215114	3.13523	10:105781752:105784691:-	25358078	4
NONRATT006315.2	1098.5	129	2068	16.031	4.00279	0.000416732	0.0881358	Up	4.80575	75.4745	10:106973848:106974402:-	25364301	1
NONRATT006389.2	66.5	124	9	0.0725806	-3.78427	0.0315947	1	Down	8.5914	0.627208	10:112502526:112503023:-	25411586	3
NONRATT006443.2	113	223	3	0.0134529	-6.21594	0.000576143	0.114985	Down	11.0929	0.12288	11:31806635:31812815:+	25450850	3
NONRATT006490.2	337	577	97	0.168111	-2.57251	0.0315202	1	Down	4.77065	0.789199	11:35586020:35588517:+	25490564	1
NONRATT006530.2	463	125	801	6.408	2.67987	0.020039	0.831577	Up	2.93001	18.3622	11:46205838:46206720:+	25515557	1
NONRATT006603.2	32	0	64	Inf	Inf	0.00806573	0.514826	Up	6.54628e-22	1.85119	11:64733756:64752504:-	25811753	4
NONRATT006699.2	4755.5	1085	8426	7.7659	2.95715	0.00565949	0.424312	Up	18.1541	138.076	11:81515844:81517078:+	25620303	1
NONRATT006873.2	21	42	0	0	#NAME?	0.026053	0.972431	Down	3.19803	1.10862e-26	11:31788282:31788553:-	25728041	1
NONRATT006926.2	25	49	1	0.0204082	-5.61471	0.0390976	1	Down	1.91458	0.0477408	11:38936920:38937451:-	25761079	1
NONRATT006955.2	18.5	0	37	Inf	Inf	0.0347368	1	Up	0	1.03189	11:49707733:49708735:-	25776847	2
NONRATT007057.2	25	50	0	0	#NAME?	0.0166539	0.774096	Down	2.99528	2.75916e-20	11:70570446:70570791:-	25848595	1
NONRATT007126.2	6149.5	2272	10027	4.41329	2.14186	0.0409961	1	Up	113.603	490.92	11:81421672:81423274:-	25905719	2
NONRATT007183.2	19	0	38	Inf	Inf	0.0328011	1	Up	1.75727e-24	1.00971	11:87557982:87577305:-	25940831	5
NONRATT007317.2	17	0	34	Inf	Inf	0.0411552	1	Up	2.56824e-22	1.516	12:16899040:16899943:+	26022611	2
NONRATT007340.2	22	44	0	0	#NAME?	0.0232343	0.911993	Down	2.06407	1.76334e-06	12:18534212:18534765:+	26036159	2
NONRATT007381.2	31.5	61	2	0.0327869	-4.93074	0.0369446	1	Down	2.17233	0.0798239	12:23350320:23390805:+	26063713	6
NONRATT007391.2	1211	1965	457	0.23257	-2.10426	0.0431816	1	Down	11.7105	2.66444	12:23814418:23817884:+	26073550	1
NONRATT007458.2	22.5	45	0	0	#NAME?	0.0219516	0.883677	Down	1.83921	6.51896e-11	12:36642113:36642735:+	26115054	2
NONRATT007487.2	284.5	3	566	188.667	7.5597	3.38306e-06	0.0023969	Up	0.0722563	15.3784	12:38161647:38162391:+	26128460	1
NONRATT007489.2	62	124	0	0	#NAME?	0.000748445	0.135968	Down	3.4479	0.000403064	12:38274347:38286216:+	26130463	6
NONRATT007498.2	30	0	60	Inf	Inf	0.00984941	0.586413	Up	2.67584e-05	0.431461	12:38411658:38452648:+	26139452	11
NONRATT007530.2	623.5	8	1239	154.875	7.27496	2.67228e-07	0.000473328	Up	0.279535	40.2138	12:39599116:39599823:+	26155270	2
NONRATT007651.2	18.5	0	37	Inf	Inf	0.0347368	1	Up	2.68462e-09	0.850382	12:51932068:51933597:+	26234822	2
NONRATT007710.2	23	0	46	Inf	Inf	0.0207484	0.849727	Up	9.16056e-10	2.48195	12:6324687:6326466:-	26268842	4
NONRATT007757.2	262.5	4	521	130.25	7.02514	1.02301e-05	0.00557538	Up	0.0466141	5.60597	12:12409870:12411750:-	26300214	1
NONRATT007949.2	23	46	0	0	#NAME?	0.0207484	0.849727	Down	1.77889	7.40411e-28	12:37904376:37905419:-	26420810	3
NONRATT008097.2	227.5	0	455	Inf	Inf	5.99593e-07	0.000849623	Up	1.5352e-08	36.5145	12:51335029:51341712:-	26506296	3
NONRATT008127.2	531.5	28	1035	36.9643	5.20806	4.88969e-05	0.0164969	Up	2.13192	76.3825	13:12298542:12298816:+	26524583	1
NONRATT008180.2	203	385	21	0.0545455	-4.1964	0.00279472	0.299021	Down	10.7419	0.570822	13:44974929:44986951:+	26559858	5
NONRATT008302.2	15.5	0	31	Inf	Inf	0.0487343	1	Up	1.30156e-25	1.04544	13:68785986:68800508:+	26638260	5
NONRATT008371.2	680	217	1143	5.26728	2.39706	0.0285	0.999721	Up	1.75904	9.06991	13:78852518:78855844:+	26688637	4
NONRATT008373.2	37.5	0	75	Inf	Inf	0.00484995	0.392707	Up	4.18328e-09	2.12509	13:78853131:78854210:+	26689776	3
NONRATT008391.2	834	212	1456	6.86792	2.77987	0.0109666	0.629135	Up	5.36753	36.0918	13:79204474:79205290:+	26703534	1
NONRATT008595.2	17.5	35	0	0	#NAME?	0.0389081	1	Down	2.57933	2.04524e-17	13:1291952:1729534:-	26835422	3
NONRATT008709.2	27	54	0	0	#NAME?	0.01345	0.693043	Down	3.41187	3.25351e-28	13:50557668:50558087:-	26909440	2
NONRATT008895.2	21.5	43	0	0	#NAME?	0.0246002	0.949821	Down	0.788291	5.2288e-09	13:80712880:80713998:-	27041156	1
NONRATT008956.2	16	32	0	0	#NAME?	0.0460487	1	Down	1.06445	3.87951e-31	13:89543430:89565820:-	27086788	4
NONRATT008957.2	18.5	37	0	0	#NAME?	0.0347368	1	Down	1.33015	2.14401e-11	13:89601895:89606688:-	27087364	5
NONRATT009029.2	198.5	40	357	8.925	3.15785	0.0181607	0.792387	Up	0.293382	2.56723	13:85373680:85376493:-	27062704	1
NONRATT009030.2	62.5	4	121	30.25	4.91886	0.0106887	0.620734	Up	0.0375377	1.2717	13:96768644:96770573:-	27131162	1
NONRATT009108.2	38.5	76	1	0.0131579	-6.24793	0.0117132	0.645822	Down	2.83874	0.0530083	13:107610018:107614883:-	27169673	3
NONRATT009189.2	48.5	91	6	0.0659341	-3.92283	0.0426025	1	Down	0.994057	0.0631769	14:3680661:3682553:+	27216814	1
NONRATT009200.2	25	50	0	0	#NAME?	0.0166539	0.774096	Down	1.42453	5.33339e-11	14:7125988:7128215:+	27223892	2
NONRATT009402.2	133	27	239	8.85185	3.14598	0.0292396	0.999721	Up	0.867433	7.409	14:63190036:63190687:+	27354644	1
NONRATT009403.2	15.5	31	0	0	#NAME?	0.0487343	1	Down	0.977813	1.06522e-21	14:64686861:64695277:+	27355289	2
NONRATT009471.2	17.5	35	0	0	#NAME?	0.0389081	1	Down	2.15898	0.0110799	14:81428174:81428511:+	27397483	1
NONRATT009709.2	73.5	140	7	0.05	-4.32193	0.014668	0.736029	Down	11.4183	0.585139	14:5451201:5451455:-	27558216	1
NONRATT009793.2	295	590	0	0	#NAME?	1.04531e-07	0.0002116	Down	28.3946	0.0203681	14:19028809:19029238:-	27622718	1
NONRATT009795.2	1688	3009	367	0.121967	-3.03543	0.00440119	0.36865	Down	39.9164	4.76547	14:19176790:19178347:-	27625455	1
NONRATT009875.2	30.5	0	61	Inf	Inf	0.00936339	0.571893	Up	2.22575e-10	2.67982	14:42476229:42491422:-	27676536	7
NONRATT009921.2	48.5	97	0	0	#NAME?	0.00200064	0.246513	Down	4.50253	0.000590305	14:47201337:47201780:-	27705504	1
NONRATT009925.2	18	36	0	0	#NAME?	0.0367726	1	Down	1.28291	0.000232552	14:56912271:56912858:-	27707774	2
NONRATT009947.2	19	0	38	Inf	Inf	0.0328011	1	Up	1.08032e-07	0.705384	14:66749800:66765729:-	27721282	5
NONRATT009965.2	119.5	226	13	0.0575221	-4.11974	0.00801994	0.514826	Down	14.8705	0.860618	14:71261399:71261713:-	27731757	1
NONRATT009987.2	85.5	9	162	18	4.16993	0.0134181	0.693043	Up	0.189492	3.30956	14:77401366:77402356:-	27742765	1
NONRATT009988.2	407	0	814	Inf	Inf	1.0886e-08	7.22991e-05	Up	5.28003e-14	24.0983	14:77402954:77404467:-	27743448	2
NONRATT010196.2	35.5	71	0	0	#NAME?	0.005794	0.427609	Down	6.02836	4.73581e-80	14:110728075:110728318:-	27879362	1
NONRATT010217.2	24	48	0	0	#NAME?	0.0185655	0.792387	Down	2.1133	4.92058e-21	14:115006910:115052456:-	27892246	4
NONRATT010241.2	174	45	303	6.73333	2.75132	0.0406977	1	Up	2.50801	16.5788	15:4130600:4130969:+	27907921	1
NONRATT010309.2	327.5	602	53	0.0880399	-3.5057	0.00512462	0.405676	Down	50.1216	4.31729	15:19139713:19139961:+	27944296	1
NONRATT010322.2	95	171	19	0.111111	-3.16993	0.0415294	1	Down	7.82571	0.83046	15:23619178:23628036:+	27952740	2
NONRATT010343.2	36	0	72	Inf	Inf	0.00553816	0.421912	Up	8.02108e-30	2.42879	15:24544018:24552726:+	27973007	4
NONRATT010352.2	27.5	0	55	Inf	Inf	0.0127587	0.679662	Up	0.000745183	0.415686	15:25358945:25361623:+	27980181	1
NONRATT010360.2	480	960	0	0	#NAME?	3.33601e-09	4.72713e-05	Down	75.088	3.41157e-08	15:27875918:27879677:+	27985416	2
NONRATT010401.2	16.5	33	0	0	#NAME?	0.0435293	1	Down	1.94596	1.57109e-24	15:33079283:33079628:+	28007974	1
NONRATT010643.2	50	96	4	0.0416667	-4.58496	0.0221965	0.891005	Down	6.32369	0.260604	15:83638190:83638505:+	28153034	1
NONRATT010697.2	16	32	0	0	#NAME?	0.0460487	1	Down	0.967428	0.0024899	15:107789378:107790070:+	28186608	1
NONRATT010833.2	35	70	0	0	#NAME?	0.00606469	0.438452	Down	3.5013	9.99697e-33	15:28308828:28309632:-	28262356	3
NONRATT010897.2	150.5	0	301	Inf	Inf	7.84329e-06	0.00444558	Up	1.3303e-30	17.6716	15:34378132:34382581:-	28310658	3
NONRATT010914.2	74.5	136	13	0.0955882	-3.38702	0.0426693	1	Down	4.18928	0.39997	15:34546010:34546681:-	28319065	1
NONRATT010946.2	16.5	33	0	0	#NAME?	0.0435293	1	Down	0.570326	0.00425181	15:38109631:38137880:-	28337765	11
NONRATT010948.2	66.5	0	133	Inf	Inf	0.000550427	0.111422	Up	6.47988e-10	4.77746	15:38113401:38130925:-	28339905	5
NONRATT010985.2	15.5	0	31	Inf	Inf	0.0487343	1	Up	4.35874e-32	1.9431	15:41669506:41672032:-	28360298	2
NONRATT011168.2	42	84	0	0	#NAME?	0.00332544	0.327232	Down	1.64222	5.93163e-17	15:89267695:89268751:-	28487058	1
NONRATT011233.2	32	0	64	Inf	Inf	0.00806573	0.514826	Up	6.22668e-06	0.300404	16:1950294:1954629:+	28526482	1
NONRATT011251.2	76	147	5	0.0340136	-4.87774	0.00736257	0.494853	Down	5.29593	0.171464	16:3100204:3101927:+	28536536	3
NONRATT011430.2	95	0	190	Inf	Inf	9.79645e-05	0.0272188	Up	1.0315e-08	0.981749	16:21153726:21160176:+	28658131	6
NONRATT011433.2	39.5	79	0	0	#NAME?	0.00408701	0.359708	Down	1.9335	8.38028e-11	16:21263999:21266056:+	28661317	2
NONRATT011444.2	43.5	85	2	0.0235294	-5.40939	0.0148492	0.736029	Down	3.10495	0.0780087	16:21606999:21607563:+	28667776	1
NONRATT011510.2	156	301	11	0.0365449	-4.77419	0.00176179	0.224906	Down	7.92907	0.281897	16:49103477:49107629:+	28707312	2
NONRATT011511.2	360	656	64	0.097561	-3.35755	0.00620721	0.446478	Down	18.0251	1.72909	16:49163593:49169307:+	28708064	3
NONRATT011565.2	26.5	1	52	52	5.70044	0.0338016	1	Up	0.0323268	1.2176	16:64064196:64065065:+	28742509	1
NONRATT011638.2	1338	20	2656	132.8	7.05311	6.9627e-08	0.000189591	Up	0.242592	31.3845	16:74552812:74554523:+	28788840	1
NONRATT011758.2	29.5	1	58	58	5.85798	0.0254238	0.971038	Up	0.0200391	0.841412	16:7626261:7627681:-	28853857	2
NONRATT011803.2	19	38	0	0	#NAME?	0.0328011	1	Down	1.54202	7.71004e-24	16:9862178:9862691:-	28874958	1
NONRATT011827.2	2456	839	4073	4.85459	2.27935	0.0266726	0.986818	Up	12.5631	59.718	16:19384861:19390410:-	28904130	5
NONRATT011965.2	385	48	722	15.0417	3.91089	0.00173685	0.22457	Up	3.88253	57.2399	16:39608977:39609232:-	28982438	1
NONRATT011977.2	24	0	48	Inf	Inf	0.0185655	0.792387	Up	2.81354e-08	0.693426	16:47857346:47861174:-	28989936	2
NONRATT012050.2	44	88	0	0	#NAME?	0.00283402	0.299021	Down	4.17773	4.89689e-23	16:68390462:68390897:-	29033949	1
NONRATT012064.2	129	22	236	10.7273	3.42321	0.0200616	0.831577	Up	0.257522	2.68466	16:71121607:71125272:-	29044395	5
NONRATT012137.2	16	32	0	0	#NAME?	0.0460487	1	Down	1.89873	0	16:81658065:81664920:-	29085754	2
NONRATT012318.2	20	0	40	Inf	Inf	0.0292333	0.999721	Up	1.47966e-30	1.68854	17:14159708:14160187:+	29186104	1
NONRATT012380.2	55	110	0	0	#NAME?	0.00123178	0.184542	Down	5.68607	0	17:24017267:24019643:+	29225650	5
NONRATT012436.2	116	208	24	0.115385	-3.11548	0.0356227	1	Down	3.38118	0.388425	17:35727809:35729079:+	29266251	1
NONRATT012520.2	1410.5	395	2426	6.14177	2.61865	0.0129612	0.687867	Up	11.6906	70.2806	17:57074539:57088632:+	29336531	3
NONRATT012539.2	26	52	0	0	#NAME?	0.0149595	0.736029	Down	2.54966	3.10489e-09	17:44791462:44793762:-	29610680	2
NONRATT012570.2	38	0	76	Inf	Inf	0.0046441	0.378201	Up	1.10728e-06	4.89545	17:62464422:62464735:+	29350458	1
NONRATT012626.2	17	0	34	Inf	Inf	0.0411552	1	Up	2.47548e-08	1.46606	17:77601852:77605886:+	29382902	3
NONRATT012705.2	38.5	77	0	0	#NAME?	0.00444877	0.36865	Down	0.862189	4.07495e-14	17:1029241:1031079:-	29434582	2
NONRATT012724.2	22.5	45	0	0	#NAME?	0.0219516	0.883677	Down	1.34429	1.15922e-07	17:3718225:3718933:-	29447850	2
NONRATT012768.2	51.5	103	0	0	#NAME?	0.00159508	0.21323	Down	8.02757	0	17:8570459:8576202:-	29471950	2
NONRATT012952.2	16	32	0	0	#NAME?	0.0460487	1	Down	0.838705	8.47825e-10	17:42085029:42088445:-	29593140	2
NONRATT013083.2	1389	2250	528	0.234667	-2.09132	0.0431117	1	Down	40.8654	9.38881	17:69639276:69642741:-	29671319	3
NONRATT013085.2	654.5	1078	231	0.214286	-2.22239	0.0416598	1	Down	31.0488	6.51658	17:69640079:69683675:-	29672658	6
NONRATT013086.2	22	44	0	0	#NAME?	0.0232343	0.911993	Down	1.45677	0	17:69667521:69668145:-	29673282	1
NONRATT013215.2	19.5	0	39	Inf	Inf	0.0309673	1	Up	1.14727e-17	2.22408	18:3566111:3574005:+	29755463	3
NONRATT013223.2	170	310	30	0.0967742	-3.36923	0.0153319	0.746125	Down	10.3983	0.973489	18:3930972:3937735:+	29761045	5
NONRATT013260.2	18.5	0	37	Inf	Inf	0.0347368	1	Up	4.92114e-16	1.74673	18:16631205:16636079:+	29784189	4
NONRATT013309.2	34	0	68	Inf	Inf	0.00665521	0.472943	Up	5.37939e-30	2.68691	18:26569183:26569697:+	29824717	1
NONRATT013333.2	20.5	0	41	Inf	Inf	0.0275962	0.993366	Up	2.92134e-10	1.09877	18:28383053:28386632:+	29839090	2
NONRATT013472.2	432	754	110	0.145889	-2.77706	0.0173195	0.792387	Down	45.5581	6.52094	18:55498331:55506250:+	29933716	2
NONRATT013635.2	844	1513	175	0.115664	-3.11199	0.00495458	0.3989	Down	69.7363	7.89844	18:81715528:81726821:+	30051352	4
NONRATT013676.2	85.5	0	171	Inf	Inf	0.000167293	0.0431008	Up	3.50581e-11	4.73704	18:12283264:12284143:-	30075312	2
NONRATT013760.2	15.5	31	0	0	#NAME?	0.0487343	1	Down	0.882497	2.28772e-21	18:29496943:29497678:-	30133133	1
NONRATT013797.2	28	0	56	Inf	Inf	0.0121066	0.654771	Up	9.03955e-24	1.71911	18:36524014:36524667:-	30155320	1
NONRATT013972.2	29	0	58	Inf	Inf	0.0109117	0.628531	Up	9.48063e-06	1.38587	18:81428125:81428978:-	30272246	1
NONRATT014288.2	639.5	230	1049	4.56087	2.18931	0.045002	1	Up	7.41275	33.1484	19:43801292:43834334:+	30467801	5
NONRATT014397.2	30	0	60	Inf	Inf	0.00984941	0.586413	Up	1.14047e-18	2.24341	19:57287084:57296595:+	30535434	5
NONRATT014432.2	20.5	0	41	Inf	Inf	0.0275962	0.993366	Up	1.10772e-25	1.81803	19:906410:914825:-	30556012	3
NONRATT014467.2	25039.5	1573	48506	30.8366	4.94657	0.000261723	0.0623907	Up	33.0915	998.829	19:11301985:11303133:-	30574556	2
NONRATT014503.2	26.5	53	0	0	#NAME?	0.0141829	0.720327	Down	1.28237	2.08092e-27	19:17864558:17865409:-	30597985	1
NONRATT014572.2	1917.5	3080	755	0.24513	-2.02838	0.0472049	1	Down	38.4553	9.23278	19:25956768:25961106:-	30645859	8
NONRATT014697.2	135	34	236	6.94118	2.79518	0.0482671	1	Up	2.25705	15.2218	19:42106859:42110157:-	30731812	3
NONRATT014844.2	75	6	144	24	4.58496	0.0104818	0.613751	Up	0.382533	8.44459	19:59861552:59861898:-	30815329	1
NONRATT014901.2	299.5	540	59	0.109259	-3.19417	0.0106525	0.620734	Down	19.5178	2.07865	2:14158503:14161887:+	30849648	2
NONRATT014910.2	304.5	595	14	0.0235294	-5.40939	0.000113921	0.0308871	Down	14.0548	0.316099	2:18928847:18944116:+	30859280	4
NONRATT014946.2	82.5	165	0	0	#NAME?	0.000199696	0.0496436	Down	6.636	9.06322e-16	2:27236102:27236615:+	30877877	1
NONRATT015112.2	1884.5	142	3627	25.5423	4.67481	4.57965e-05	0.015886	Up	4.49867	112.845	2:78214960:78253049:+	30992401	6
NONRATT015129.2	30	58	2	0.0344828	-4.85798	0.0419785	1	Down	2.45681	0.0946673	2:84658212:84658696:+	31002569	1
NONRATT015171.2	29.5	0	59	Inf	Inf	0.0103649	0.609423	Up	0.00164831	1.04038	2:100677047:100697063:+	31027795	4
NONRATT015173.2	28.5	55	2	0.0363636	-4.78136	0.0478254	1	Down	2.59871	0.103153	2:100696612:100697049:+	31029001	1
NONRATT015273.2	52.5	0	105	Inf	Inf	0.00148059	0.203689	Up	3.16368e-06	2.59105	2:140525774:140531190:+	31095316	5
NONRATT015280.2	24	48	0	0	#NAME?	0.0185655	0.792387	Down	2.56136	7.22419e-23	2:141451227:141451615:+	31098824	1
NONRATT015370.2	2652.5	486	4819	9.91564	3.30971	0.00202818	0.247752	Up	14.7504	143.315	2:182012483:182013163:+	31166465	1
NONRATT015416.2	24	48	0	0	#NAME?	0.0185655	0.792387	Down	3.44201	1.41633e-31	2:187690133:187690421:+	31191165	1
NONRATT015437.2	46	0	92	Inf	Inf	0.00242416	0.279271	Up	8.20885e-16	1.71865	2:188388180:188389263:+	31208699	1
NONRATT015468.2	16	32	0	0	#NAME?	0.0460487	1	Down	1.14322	4.14485e-12	2:189430047:189438081:+	31231221	4
NONRATT015679.2	23	46	0	0	#NAME?	0.0207484	0.849727	Down	1.58219	2.53999e-16	2:209163302:209181190:+	31363831	5
NONRATT015689.2	288.5	496	81	0.163306	-2.61435	0.033008	1	Down	14.5397	2.31277	2:210045293:210053595:+	31372073	5
NONRATT015697.2	28.5	57	0	0	#NAME?	0.0114916	0.636077	Down	4.09276	4.38038e-30	2:211078317:211078606:+	31375882	1
NONRATT015713.2	20.5	41	0	0	#NAME?	0.0275962	0.993366	Down	2.45126	1.86967e-16	2:217207522:217207866:+	31387377	1
NONRATT015794.2	21	0	42	Inf	Inf	0.026053	0.972431	Up	6.62393e-09	1.44297	2:240648107:240654800:+	31441615	3
NONRATT015825.2	557.5	1046	69	0.0659656	-3.92214	0.00102079	0.161863	Down	20.7507	1.34645	2:243709438:243710479:+	31462290	1
NONRATT015855.2	43	86	0	0	#NAME?	0.00306837	0.315063	Down	0.767248	0.00279889	2:251763185:251766013:+	31481674	2
NONRATT015950.2	234.5	71	398	5.60563	2.48688	0.0486169	1	Up	1.29011	7.12556	2:14699896:14701026:-	31550037	1
NONRATT016002.2	163	35	291	8.31429	3.05559	0.0268053	0.989144	Up	0.781075	6.33261	2:28352487:28370216:-	31584523	5
NONRATT016080.2	33	66	0	0	#NAME?	0.00731926	0.494853	Down	5.1787	3.17507e-07	2:37619765:37854758:-	31642625	2
NONRATT016094.2	27	53	1	0.0188679	-5.72792	0.0322136	1	Down	1.38704	0.0372536	2:40962785:40970607:-	31651961	3
NONRATT016429.2	44.5	5	84	16.8	4.07039	0.0417881	1	Up	0.110543	1.8297	2:152785959:152788350:-	31863416	2
NONRATT016587.2	129	21	237	11.2857	3.49643	0.0179808	0.792387	Up	1.04968	11.4216	2:188399054:188399934:-	31951943	5
NONRATT016618.2	75	150	0	0	#NAME?	0.000316438	0.0723214	Down	3.64652	4.38868e-10	2:189889361:189892175:-	31971670	2
NONRATT016695.2	24	48	0	0	#NAME?	0.0185655	0.792387	Down	1.7348	0.000308371	2:199683772:199684352:-	32020826	2
NONRATT016723.2	65	128	2	0.015625	-6	0.00370276	0.345185	Down	7.50801	0.139487	2:204699083:204699434:-	32036588	1
NONRATT016724.2	15.5	31	0	0	#NAME?	0.0487343	1	Down	0.919648	4.32225e-17	2:204699167:204699867:-	32037288	1
NONRATT016756.2	21.5	43	0	0	#NAME?	0.0246002	0.949821	Down	1.52145	3.27913e-22	2:209317002:209317580:-	32057974	1
NONRATT016761.2	58	108	8	0.0740741	-3.75489	0.0394963	1	Down	1.29923	0.0990735	2:210744909:210746622:-	32063411	1
NONRATT016762.2	25	0	50	Inf	Inf	0.0166539	0.774096	Up	1.28726e-09	1.53589	2:210761304:210763655:-	32064063	2
NONRATT016806.2	34	65	3	0.0461538	-4.43741	0.045486	1	Down	1.57926	0.0713896	2:218778611:218779811:-	32092081	3
NONRATT016849.2	25	0	50	Inf	Inf	0.0166539	0.774096	Up	9.78338e-13	1.91742	2:227718790:227719470:-	32123525	2
NONRATT016869.2	38.5	0	77	Inf	Inf	0.00444877	0.36865	Up	4.962e-21	4.21757	2:232148092:232155852:-	32133065	5
NONRATT017032.2	52.5	0	105	Inf	Inf	0.00148059	0.203689	Up	0	7.76102	20:3162887:3163445:+	32234975	2
NONRATT017161.2	25	0	50	Inf	Inf	0.0166539	0.774096	Up	0	1.98842	20:26787502:26796535:+	32429731	4
NONRATT017172.2	920	172	1668	9.69767	3.27764	0.00311686	0.31774	Up	3.82442	36.2972	20:6357940:6358869:+	32303718	1
NONRATT017223.2	26.5	1	52	52	5.70044	0.0338016	1	Up	0.0296804	1.0481	20:8303987:8309870:+	32340319	2
NONRATT017258.2	59	9	109	12.1111	3.59826	0.0454524	1	Up	0.786539	9.26591	20:11060578:11124470:+	32366702	3
NONRATT017371.2	17	0	34	Inf	Inf	0.0411552	1	Up	0	2.27884	20:28077049:28077353:+	32437523	1
NONRATT017385.2	28	1	55	55	5.78136	0.0292791	0.999721	Up	0.0234244	1.50913	20:29854976:29856460:+	32446621	2
NONRATT017450.2	85.5	0	171	Inf	Inf	0.000167293	0.0431008	Up	4.24498e-05	2.46572	20:47543781:47560344:+	32482660	7
NONRATT017477.2	142.5	285	0	0	#NAME?	1.07825e-05	0.00565882	Down	10.1857	0	20:55253673:55275398:+	32496192	3
NONRATT017506.2	20.5	41	0	0	#NAME?	0.0275962	0.993366	Down	1.58421	3.35838e-08	20:3187451:3188794:-	32507854	2
NONRATT017649.2	181.5	0	363	Inf	Inf	2.53163e-06	0.00199296	Up	3.67836e-07	9.46029	20:10668735:10669511:-	32577515	1
NONRATT017723.2	210.5	390	31	0.0794872	-3.65313	0.00703081	0.483624	Down	3.62645	0.279473	20:20638565:20640785:-	32624510	1
NONRATT017766.2	27	0	54	Inf	Inf	0.01345	0.693043	Up	6.03258e-12	3.29745	20:33487635:33488954:-	32655459	2
NONRATT017811.2	317	98	536	5.46939	2.45138	0.0412546	1	Up	2.43937	13.1142	20:45140110:45141067:-	32680495	2
NONRATT017864.2	80.5	152	9	0.0592105	-4.078	0.0166619	0.774096	Down	8.06685	0.452892	3:2299330:2299720:+	32703333	1
NONRATT017993.2	60.5	4	117	29.25	4.87036	0.0119707	0.654357	Up	0.225457	6.5998	3:8633304:8635344:+	32786087	4
NONRATT018152.2	17.5	0	35	Inf	Inf	0.0389081	1	Up	2.46096e-17	1.52962	3:43352634:43355914:+	32879453	2
NONRATT018220.2	30	60	0	0	#NAME?	0.00984941	0.586413	Down	1.66424	1.04662e-16	3:55960321:55971381:+	32912894	7
NONRATT018272.2	113.5	0	227	Inf	Inf	3.83081e-05	0.0142849	Up	0.000417154	3.47468	3:62483766:62487699:+	32951706	9
NONRATT018273.2	113.5	214	13	0.0607477	-4.04103	0.00979477	0.586413	Down	2.9413	0.172519	3:62484022:62488055:+	32953208	8
NONRATT018379.2	21	0	42	Inf	Inf	0.026053	0.972431	Up	2.18054e-16	2.02071	3:82081900:82092856:+	33022370	4
NONRATT018407.2	50	100	0	0	#NAME?	0.00178536	0.22588	Down	2.73195	1.9519e-13	3:93969670:93985238:+	33042129	5
NONRATT018425.2	17.5	0	35	Inf	Inf	0.0389081	1	Up	0	1.47518	3:95996122:96023182:+	33055685	4
NONRATT018538.2	184	342	26	0.0760234	-3.71741	0.00763696	0.508634	Down	12.6276	0.925236	3:114366647:114646999:+	33129556	4
NONRATT018556.2	31.5	63	0	0	#NAME?	0.00847311	0.526596	Down	1.03511	5.43874e-07	3:117938795:117940221:+	33140612	2
NONRATT018642.2	25.5	51	0	0	#NAME?	0.0157824	0.752984	Down	1.42754	2.23793e-12	3:126345136:126345878:+	33199387	1
NONRATT018677.2	24.5	49	0	0	#NAME?	0.0175781	0.792387	Down	0.812308	4.6758e-28	3:140062418:140083019:+	33221020	4
NONRATT018730.2	1969	669	3269	4.8864	2.28877	0.0264287	0.982926	Up	4.3612	20.8617	3:147607480:147614406:+	33251734	3
NONRATT018732.2	65	10	120	12	3.58496	0.0406366	1	Up	0.598177	7.25185	3:147713900:147743513:+	33252386	4
NONRATT018750.2	26	0	52	Inf	Inf	0.0149595	0.736029	Up	1.47086e-10	1.15323	3:148215581:148216710:+	33267054	2
NONRATT018854.2	115.5	213	18	0.084507	-3.56478	0.0188802	0.798606	Down	5.90606	0.497252	3:159381346:159385319:+	33341040	2
NONRATT019015.2	244	23	465	20.2174	4.33752	0.00153722	0.209446	Up	1.70254	33.6987	3:1260420:1260699:-	33442659	1
NONRATT019080.2	19.5	0	39	Inf	Inf	0.0309673	1	Up	5.90759e-22	1.0391	3:3797149:3798138:-	33480824	2
NONRATT019141.2	16.5	0	33	Inf	Inf	0.0435293	1	Up	3.25293e-26	1.04713	3:8970416:8972564:-	33519343	4
NONRATT019299.2	86.5	4	169	42.25	5.40088	0.00304726	0.315063	Up	0.0317973	1.28267	3:37950723:37953382:-	33627850	1
NONRATT019387.2	30	60	0	0	#NAME?	0.00984941	0.586413	Down	0.789263	1.13085e-06	3:60726712:60795951:-	33675993	13
NONRATT019398.2	29	58	0	0	#NAME?	0.0109117	0.628531	Down	1.07051	4.93166e-10	3:63488778:63489903:-	33682095	1
NONRATT019458.2	17.5	35	0	0	#NAME?	0.0389081	1	Down	2.94069	0.00067613	3:80539238:80539566:-	33717516	2
NONRATT019484.2	84.5	169	0	0	#NAME?	0.000177385	0.0448847	Down	6.54741	0	3:82324818:82325645:-	33733393	2
NONRATT019518.2	17.5	0	35	Inf	Inf	0.0389081	1	Up	1.85311e-05	0.919403	3:93705117:93708820:-	33757342	3
NONRATT019591.2	371	690	52	0.0753623	-3.73001	0.00271156	0.294715	Down	9.68108	0.717621	3:110303514:110304986:-	33811049	1
NONRATT019675.2	26.5	0	53	Inf	Inf	0.0141829	0.720327	Up	2.17774e-14	0.659459	3:121736865:121739165:+	33164968	2
NONRATT019709.2	40.5	79	2	0.0253165	-5.30378	0.0183566	0.792387	Down	3.31182	0.0838532	3:124246782:124247275:-	33896342	1
NONRATT019757.2	95	170	20	0.117647	-3.08746	0.046229	1	Down	2.99188	0.341179	3:142249150:142250321:-	33934151	1
NONRATT019786.2	1541.5	63	3020	47.9365	5.58305	3.689e-06	0.00248919	Up	1.59783	74.573	3:145807914:145834134:-	33950800	6
NONRATT019853.2	137	274	0	0	#NAME?	1.35172e-05	0.0066048	Down	13.6027	5.45218e-14	3:151248289:151258581:-	33997401	4
NONRATT019897.2	54	4	104	26	4.70044	0.0174644	0.792387	Up	0.185684	4.48876	3:156557262:156618004:-	34021869	4
NONRATT019964.2	15.5	31	0	0	#NAME?	0.0487343	1	Down	0.939056	1.77592e-10	3:161814384:161816991:-	34053185	2
NONRATT020051.2	50	93	7	0.0752688	-3.7318	0.0490729	1	Down	2.90373	0.211625	3:176695151:176695816:-	34122781	1
NONRATT020211.2	24	0	48	Inf	Inf	0.0185655	0.792387	Up	2.08505e-18	1.20067	4:27698368:27702622:+	34212341	3
NONRATT020232.2	227.5	0	455	Inf	Inf	5.99593e-07	0.000849623	Up	3.37458e-08	8.23316	4:33942099:33943217:+	34226510	1
NONRATT020233.2	123.5	0	247	Inf	Inf	2.41978e-05	0.0100848	Up	3.75488e-10	3.16555	4:34238472:34245602:+	34228085	3
NONRATT020259.2	17.5	0	35	Inf	Inf	0.0389081	1	Up	5.41416e-09	1.02896	4:45555171:45560943:+	34249563	4
NONRATT020296.2	429	134	724	5.40299	2.43376	0.0345918	1	Up	3.06552	16.1535	4:56547733:56550582:+	34266014	2
NONRATT020324.2	118.5	0	237	Inf	Inf	3.03485e-05	0.0119455	Up	4.29229e-05	1.70521	4:57771002:57773808:+	34285597	1
NONRATT020359.2	1323.5	2186	461	0.210887	-2.24545	0.0311152	1	Down	52.876	10.9045	4:62780604:62790777:+	34306159	4
NONRATT020375.2	29	56	2	0.0357143	-4.80735	0.0457787	1	Down	1.88519	0.0636511	4:66308491:66331714:+	34319430	4
NONRATT020397.2	137	274	0	0	#NAME?	1.35172e-05	0.0066048	Down	15.5198	7.8267e-09	4:68941931:68944009:+	34341677	4
NONRATT020414.2	28.5	2	55	27.5	4.78136	0.0478254	1	Up	0.0470556	1.4956	4:71741570:71746773:+	34350694	3
NONRATT020463.2	27	0	54	Inf	Inf	0.01345	0.693043	Up	1.98998e-09	1.04925	4:81244481:81257211:+	34381326	7
NONRATT020541.2	21	0	42	Inf	Inf	0.026053	0.972431	Up	4.53447e-26	2.35839	4:98684435:98687804:+	34436068	3
NONRATT020546.2	26.5	53	0	0	#NAME?	0.0141829	0.720327	Down	1.99279	9.08772e-14	4:99397991:99398771:+	34438933	2
NONRATT020666.2	17	34	0	0	#NAME?	0.0411552	1	Down	1.13491	0	4:118328978:118351326:+	34513294	4
NONRATT020673.2	32.5	0	65	Inf	Inf	0.00768157	0.508634	Up	3.27297e-14	1.13348	4:118748702:118767246:+	34518364	8
NONRATT020706.2	17.5	0	35	Inf	Inf	0.0389081	1	Up	1.19063e-17	0.950189	4:120843498:120852126:+	34541335	7
NONRATT020745.2	40.5	2	79	39.5	5.30378	0.0183566	0.792387	Up	0.0501762	1.89058	4:127176695:127177537:+	34567466	1
NONRATT020794.2	16	0	32	Inf	Inf	0.0460487	1	Up	5.8752e-31	1.97514	4:145581056:145585608:+	34597624	3
NONRATT020850.2	51	102	0	0	#NAME?	0.00165593	0.217264	Down	8.00654	0.000231124	4:140895582:140901178:+	34578612	3
NONRATT020853.2	21	42	0	0	#NAME?	0.026053	0.972431	Down	1.67526	0	4:152380339:152381917:+	34626220	2
NONRATT020860.2	36	0	72	Inf	Inf	0.00553816	0.421912	Up	2.73635e-05	0.860612	4:152966561:152968248:+	34630566	1
NONRATT020877.2	81.5	151	12	0.0794702	-3.65344	0.0274477	0.993366	Down	2.339	0.185953	4:154560601:154563402:+	34642642	3
NONRATT020910.2	201	35	367	10.4857	3.39035	0.0119469	0.654357	Up	1.47165	15.0445	4:157646801:157649056:+	34661061	5
NONRATT021040.2	103.5	0	207	Inf	Inf	6.26157e-05	0.0201651	Up	4.20336e-05	1.11447	4:180132181:180135931:+	34759723	1
NONRATT021057.2	18	0	36	Inf	Inf	0.0367726	1	Up	0.000157936	0.433415	4:181971822:182043593:+	34771306	7
NONRATT021115.2	369.5	37	702	18.973	4.24587	0.000888427	0.146917	Up	0.543826	10.2384	4:7818642:7822858:-	34806638	4
NONRATT021179.2	15.5	0	31	Inf	Inf	0.0487343	1	Up	1.78029e-08	1.12513	4:25392054:25392618:-	34855678	2
NONRATT021210.2	59.5	4	115	28.75	4.84549	0.0126749	0.679662	Up	0.130788	4.00903	4:28761511:28762089:-	34875094	1
NONRATT021240.2	31.5	0	63	Inf	Inf	0.00847311	0.526596	Up	3.14711e-25	1.76395	4:34740520:34779792:-	34901330	6
NONRATT021272.2	22.5	0	45	Inf	Inf	0.0219516	0.883677	Up	1.26064e-18	1.09812	4:51697073:51726245:-	34921563	4
NONRATT021420.2	20	40	0	0	#NAME?	0.0292333	0.999721	Down	1.02649	0.000225526	4:81235167:81236469:-	35017675	2
NONRATT021493.2	239.5	426	53	0.124413	-3.00679	0.0192895	0.813488	Down	15.4465	1.86585	4:100222884:100224722:-	35079900	5
NONRATT021559.2	16	32	0	0	#NAME?	0.0460487	1	Down	2.73945	0	4:117068076:117111508:-	35126165	4
NONRATT021584.2	39	0	78	Inf	Inf	0.00426328	0.366125	Up	3.18825e-34	4.96777	4:119429377:119429694:-	35144064	1
NONRATT021731.2	60.5	118	3	0.0254237	-5.29768	0.00805069	0.514826	Down	7.2356	0.183225	4:147949124:147975608:-	35249030	2
NONRATT021884.2	19	38	0	0	#NAME?	0.0328011	1	Down	0.221594	0.000189713	4:165424758:165460050:-	35360670	9
NONRATT021953.2	371	683	59	0.0863836	-3.5331	0.00413443	0.361635	Down	5.70661	0.478613	4:176805444:176807916:-	35397840	1
NONRATT022018.2	77	3	151	50.3333	5.65344	0.00318004	0.319582	Up	0.102659	4.42584	5:3956401:3957093:+	35441715	1
NONRATT022322.2	68	131	5	0.0381679	-4.71149	0.0111022	0.634349	Down	4.81673	0.179191	5:78563867:78565306:+	35654905	3
NONRATT022346.2	18.5	37	0	0	#NAME?	0.0347368	1	Down	0.557995	0.000158695	5:100650511:100688184:+	35672335	2
NONRATT022384.2	459.5	846	73	0.0862884	-3.53469	0.00317992	0.319582	Down	24.6712	2.07628	5:112836483:112837191:+	35694325	1
NONRATT022451.2	16	0	32	Inf	Inf	0.0460487	1	Up	0	1.98894	5:126856699:126876092:+	35735888	4
NONRATT022568.2	24.5	1	48	48	5.58496	0.0410574	1	Up	0.0252167	1.44625	5:138188803:138189470:+	35807935	1
NONRATT022650.2	23.5	0	47	Inf	Inf	0.019621	0.822402	Up	2.45557e-12	1.20703	5:146924587:146930417:+	35864866	4
NONRATT022820.2	30.5	61	0	0	#NAME?	0.00936339	0.571893	Down	3.28805	4.35537e-28	5:159755594:159762335:+	35970661	3
NONRATT022880.2	61.5	0	123	Inf	Inf	0.000774924	0.137258	Up	2.18534e-42	10.4031	5:167651195:167651435:+	35997811	1
NONRATT022976.2	19.5	0	39	Inf	Inf	0.0309673	1	Up	1.22134e-30	2.19823	5:2870202:2882416:-	36061115	4
NONRATT023004.2	28.5	55	2	0.0363636	-4.78136	0.0478254	1	Down	1.25797	0.0364584	5:9423651:9429717:-	36078118	4
NONRATT023007.2	39	0	78	Inf	Inf	0.00426328	0.366125	Up	6.28264e-19	5.4213	5:9674826:9675116:-	36079418	1
NONRATT023016.2	30.5	0	61	Inf	Inf	0.00936339	0.571893	Up	2.69003e-07	2.89829	5:13035710:13038797:-	36083582	3
NONRATT023017.2	20	40	0	0	#NAME?	0.0292333	0.999721	Down	2.66376	8.73323e-27	5:13065143:13065457:-	36083896	1
NONRATT023026.2	21.5	0	43	Inf	Inf	0.0246002	0.949821	Up	1.88247e-22	1.00506	5:16383564:16392558:-	36088689	5
NONRATT023029.2	70.5	10	131	13.1	3.71149	0.0315351	1	Up	0.247237	3.2778	5:16704733:16705540:-	36090130	1
NONRATT023136.2	21	42	0	0	#NAME?	0.026053	0.972431	Down	2.28508	5.35819e-29	5:50556927:50638147:-	36165635	2
NONRATT023144.2	18.5	0	37	Inf	Inf	0.0347368	1	Up	3.80313e-22	1.78892	5:57055063:57059725:-	36170268	3
NONRATT023213.2	61.5	0	123	Inf	Inf	0.000774924	0.137258	Up	2.50734e-06	3.57667	5:60992102:61037335:-	36211923	4
NONRATT023249.2	38.5	77	0	0	#NAME?	0.00444877	0.36865	Down	3.39061	1.3475e-09	5:73986136:73986607:-	36238821	1
NONRATT023325.2	62.5	0	125	Inf	Inf	0.000722962	0.134794	Up	1.83519e-17	7.58132	5:87552696:87585939:-	36279914	2
NONRATT023335.2	69	138	0	0	#NAME?	0.00046604	0.0957072	Down	7.71623	8.19519e-21	5:92868535:92871528:-	36288759	2
NONRATT023360.2	438.5	136	741	5.44853	2.44587	0.0333018	1	Up	4.80336	25.5703	5:101613419:101614005:-	36310515	1
NONRATT023452.2	71	0	142	Inf	Inf	0.000408837	0.087776	Up	2.58507e-06	4.06226	5:127505642:127506349:-	36376868	1
NONRATT023504.2	39	78	0	0	#NAME?	0.00426328	0.366125	Down	1.93761	0.00150066	5:135988950:135989895:-	36416827	2
NONRATT023544.2	28.5	0	57	Inf	Inf	0.0114916	0.636077	Up	6.53087e-14	3.00173	5:138324457:138325180:-	36435824	2
NONRATT023579.2	48.5	0	97	Inf	Inf	0.00200064	0.246513	Up	1.43692e-12	2.97618	5:141040646:141041995:-	36459059	2
NONRATT023651.2	28.5	0	57	Inf	Inf	0.0114916	0.636077	Up	0.0272327	3.06371	5:148386618:148392697:-	36499219	4
NONRATT023752.2	358	39	677	17.359	4.11761	0.00123722	0.184542	Up	2.05431	35.0033	5:156100838:156115834:-	36563807	3
NONRATT023980.2	89	176	2	0.0113636	-6.45943	0.000973057	0.156684	Down	5.38204	0.0480426	6:2262819:2280619:+	36722744	8
NONRATT024059.2	19	0	38	Inf	Inf	0.0328011	1	Up	5.78014e-26	2.29734	6:24080523:24084757:+	36773557	2
NONRATT024110.2	16.5	33	0	0	#NAME?	0.0435293	1	Down	2.28014	2.11775e-31	6:28168941:28177073:+	36807661	4
NONRATT024111.2	72	144	0	0	#NAME?	0.0003832	0.0861896	Down	7.19856	0.000553119	6:28175338:28177234:+	36808075	2
NONRATT024155.2	44.5	89	0	0	#NAME?	0.00272461	0.294715	Down	4.52025	0.00210033	6:39609731:39610136:+	36835660	1
NONRATT024163.2	108.5	21	196	9.33333	3.22239	0.0331151	1	Up	1.0698	9.77976	6:42852680:42855281:+	36838698	4
NONRATT024218.2	39.5	0	79	Inf	Inf	0.00408701	0.359708	Up	0	1.93568	6:43797382:43798205:+	36851021	1
NONRATT024248.2	40	80	0	0	#NAME?	0.00391939	0.356011	Down	6.00295	1.51848e-13	6:59406538:59406814:+	36894232	1
NONRATT024282.2	21	42	0	0	#NAME?	0.026053	0.972431	Down	1.93554	6.4484e-35	6:75533322:75533770:+	36914486	1
NONRATT024336.2	15.5	31	0	0	#NAME?	0.0487343	1	Down	0.317544	1.01583e-20	6:86859020:86876500:+	36953687	9
NONRATT024420.2	84	162	6	0.037037	-4.75489	0.00682847	0.48139	Down	12.9374	0.504479	6:99817459:99831463:+	36996876	3
NONRATT024455.2	24	0	48	Inf	Inf	0.0185655	0.792387	Up	0.00115113	1.28745	6:104611082:104614941:+	37024501	7
NONRATT024588.2	24.5	49	0	0	#NAME?	0.0175781	0.792387	Down	1.41838	1.96187e-12	6:127328965:127332246:+	37108974	3
NONRATT024745.2	47	0	94	Inf	Inf	0.00224438	0.265023	Up	0.00523168	1.38674	6:963901:988572:-	37226574	5
NONRATT024763.2	166.5	25	308	12.32	3.62293	0.0103591	0.609423	Up	0.612341	7.29125	6:2880651:2886435:-	37240427	8
NONRATT024811.2	37	0	74	Inf	Inf	0.00506703	0.40337	Up	0.00325272	1.4895	6:11067701:11080366:-	37269908	3
NONRATT024849.2	24.5	0	49	Inf	Inf	0.0175781	0.792387	Up	1.89945e-24	2.12357	6:25954861:26051242:-	37292759	5
NONRATT024864.2	130	234	26	0.111111	-3.16993	0.0289622	0.999721	Down	3.75637	0.405711	6:26816479:26820718:-	37300799	2
NONRATT024928.2	310.5	40	581	14.525	3.86047	0.0026575	0.294715	Up	1.08795	15.528	6:41827610:41839107:-	37336535	5
NONRATT024952.2	17.5	0	35	Inf	Inf	0.0389081	1	Up	7.15598e-10	1.13626	6:50598257:50598968:-	37357321	2
NONRATT024996.2	44.5	0	89	Inf	Inf	0.00272461	0.294715	Up	4.13837e-07	1.72522	6:72377376:72378501:-	37382829	2
NONRATT025013.2	38.5	0	77	Inf	Inf	0.00444877	0.36865	Up	7.26062e-05	2.10022	6:75760972:75761798:-	37394593	2
NONRATT025109.2	19.5	0	39	Inf	Inf	0.0309673	1	Up	2.69373e-19	0.900714	6:96167213:96171613:-	37451167	4
NONRATT025145.2	17.5	0	35	Inf	Inf	0.0389081	1	Up	3.35461e-05	1.09122	6:102076811:102078091:-	37475339	2
NONRATT025149.2	33.5	67	0	0	#NAME?	0.00697753	0.4823	Down	3.80861	2.99175e-08	6:102266119:102268284:-	37477172	2
NONRATT025352.2	40	0	80	Inf	Inf	0.00391939	0.356011	Up	1.17979e-09	3.79265	6:136005315:136007618:+	37192685	4
NONRATT025519.2	53	6	100	16.6667	4.05889	0.0330668	1	Up	0.174397	3.05218	7:11242479:11243310:+	37687446	3
NONRATT025521.2	65.5	131	0	0	#NAME?	0.000588818	0.115883	Down	4.63322	8.53869e-08	7:11242643:11243312:+	37688032	2
NONRATT025534.2	201.5	403	0	0	#NAME?	1.3129e-06	0.00124025	Down	5.41744	0.00194713	7:11544998:11551068:+	37696218	5
NONRATT025573.2	75	147	3	0.0204082	-5.61471	0.00354062	0.338582	Down	7.24425	0.122834	7:12314912:12315331:+	37717615	1
NONRATT025771.2	487	165	809	4.90303	2.29367	0.0420483	1	Up	3.743	17.9834	7:41308752:41309662:+	37836505	1
NONRATT025792.2	389	55	723	13.1455	3.71649	0.00261912	0.294715	Up	0.88205	11.3104	7:54213331:54236613:+	37856157	14
NONRATT025884.2	90	173	7	0.0404624	-4.62727	0.00689512	0.4823	Down	8.7185	0.327448	7:70814414:70815270:+	37914249	4
NONRATT025888.2	19.5	39	0	0	#NAME?	0.0309673	1	Down	2.58163	2.57836e-18	7:71789891:71790207:+	37915938	1
NONRATT026049.2	35.5	0	71	Inf	Inf	0.005794	0.427609	Up	0	2.5665	7:117409599:117410868:+	38012477	4
NONRATT026053.2	15.5	31	0	0	#NAME?	0.0487343	1	Down	1.1051	1.93031e-16	7:117417693:117419039:+	38016246	2
NONRATT026054.2	18.5	0	37	Inf	Inf	0.0347368	1	Up	1.78284e-30	2.20505	7:117417872:117419284:+	38016581	3
NONRATT026058.2	53	0	106	Inf	Inf	0.00142673	0.202168	Up	8.96551e-17	3.62038	7:117435978:117436571:+	38018631	1
NONRATT026198.2	816.5	1330	303	0.22782	-2.13404	0.0456285	1	Down	14.7943	3.29451	7:126685425:126687282:+	38110524	1
NONRATT026216.2	479	7	951	135.857	7.08595	9.68163e-07	0.00108199	Up	0.112116	14.3761	7:129862033:129863445:+	38123375	2
NONRATT026230.2	18.5	0	37	Inf	Inf	0.0347368	1	Up	2.69563e-10	0.970635	7:130309302:130310218:+	38133885	2
NONRATT026298.2	15.5	31	0	0	#NAME?	0.0487343	1	Down	0.878783	2.28363e-05	7:142238798:142243185:+	38259397	4
NONRATT026300.2	96.5	193	0	0	#NAME?	9.03358e-05	0.0261236	Down	5.36984	0.000209262	7:142239122:142243459:+	38261218	3
NONRATT026305.2	54.5	7	102	14.5714	3.86507	0.0384572	1	Up	0.146955	2.06373	7:142459169:142465000:+	38264996	4
NONRATT026333.2	30	1	59	59	5.88264	0.0242702	0.947408	Up	0.0228106	2.03729	7:143810035:143814409:+	38279358	4
NONRATT026369.2	20	40	0	0	#NAME?	0.0292333	0.999721	Down	0.839419	0.00162411	7:4607:5603:-	38298141	1
NONRATT026407.2	204	408	0	0	#NAME?	1.21365e-06	0.00122839	Down	19.8188	6.37716e-05	7:3340847:3341953:-	38318871	2
NONRATT026494.2	23.5	1	46	46	5.52356	0.0453486	1	Up	0.0312096	1.00002	7:11973955:11976731:-	38365741	4
NONRATT026579.2	23	45	1	0.0222222	-5.49185	0.0476947	1	Down	0.902313	0.0227146	7:15158830:15172490:-	38429807	5
NONRATT026581.2	20	40	0	0	#NAME?	0.0292333	0.999721	Down	0.918172	1.91511e-17	7:15180014:15183548:-	38430705	6
NONRATT026609.2	2465.5	724	4207	5.81077	2.53873	0.0145048	0.734046	Up	3.73387	21.2325	7:23543123:23548539:-	38450201	3
NONRATT026658.2	42	84	0	0	#NAME?	0.00332544	0.327232	Down	6.64542	5.44929e-12	7:30073927:30076161:-	38481147	3
NONRATT026697.2	161	3	319	106.333	6.73245	9.59644e-05	0.0271963	Up	0.0808678	10.0853	7:36646009:36648580:-	38502980	4
NONRATT026699.2	484	158	810	5.12658	2.358	0.0372053	1	Up	12.55	63.0054	7:36646315:36648129:-	38504203	3
NONRATT026808.2	19.5	39	0	0	#NAME?	0.0309673	1	Down	0.356397	2.12764e-24	7:66017082:66056905:-	38578800	2
NONRATT026884.2	18	36	0	0	#NAME?	0.0367726	1	Down	2.29955	3.95293e-31	7:76793088:76794841:-	38630164	2
NONRATT026945.2	388	776	0	0	#NAME?	1.53068e-08	7.22991e-05	Down	30.6021	0.00038209	7:97738957:97743202:-	38662393	2
NONRATT026971.2	21	42	0	0	#NAME?	0.026053	0.972431	Down	3.57976	0	7:98798472:98802196:-	38678014	3
NONRATT027060.2	36.5	0	73	Inf	Inf	0.00529615	0.41009	Up	8.82422e-06	2.23924	7:117566367:117567410:-	38726347	5
NONRATT027131.2	111.5	10	213	21.3	4.41278	0.00597778	0.435727	Up	0.271616	5.48777	7:121301178:121301964:-	38769190	1
NONRATT027166.2	108	199	17	0.0854271	-3.54916	0.0211542	0.863848	Down	5.96791	0.512999	7:123599263:123600050:-	38788469	2
NONRATT027247.2	24	48	0	0	#NAME?	0.0185655	0.792387	Down	2.47487	7.35363e-23	7:130450538:130450939:-	38843909	1
NONRATT027271.2	24	0	48	Inf	Inf	0.0185655	0.792387	Up	1.63714e-12	0.627163	7:135838651:135843924:-	38860197	4
NONRATT027286.2	60	0	120	Inf	Inf	0.000860762	0.146917	Up	0.00122313	3.73712	7:137816789:137856337:-	38869574	8
NONRATT027438.2	443.5	136	751	5.52206	2.46521	0.0318222	1	Up	2.15752	11.6754	8:13861288:13871354:+	38997801	13
NONRATT027470.2	17.5	35	0	0	#NAME?	0.0389081	1	Down	1.18927	1.23358e-23	8:21637561:21638169:+	39019666	1
NONRATT027576.2	488.5	870	107	0.122989	-3.0234	0.00926933	0.571893	Down	14.4518	1.74444	8:39687384:39703080:+	39081269	5
NONRATT027654.2	213	6	420	70	6.12928	8.65895e-05	0.0255619	Up	0.16079	11.1094	8:50568497:50571565:+	39135712	4
NONRATT027849.2	125	0	250	Inf	Inf	2.26353e-05	0.00971944	Up	3.76241e-07	2.29068	8:76864339:76875889:-	39841003	6
NONRATT027854.2	22	0	44	Inf	Inf	0.0232343	0.911993	Up	1.33356e-19	1.86651	8:72744057:72746086:+	39247696	2
NONRATT027869.2	137	30	244	8.13333	3.02385	0.0339539	1	Up	1.01066	7.99549	8:81752146:81754485:+	39281185	3
NONRATT027870.2	1594	311	2877	9.2508	3.20958	0.00284882	0.299021	Up	2.88573	26.1156	8:81794851:81797079:+	39283413	1
NONRATT027878.2	210.5	0	421	Inf	Inf	9.92652e-07	0.00108199	Up	0.00100469	18.4276	8:81963660:81968607:+	39292212	2
NONRATT027957.2	26	0	52	Inf	Inf	0.0149595	0.736029	Up	1.34362e-13	1.5677	8:103877710:103878935:+	39340282	2
NONRATT028009.2	17.5	35	0	0	#NAME?	0.0389081	1	Down	0.507726	2.13086e-24	8:115164192:115165716:+	39374643	2
NONRATT028095.2	19	38	0	0	#NAME?	0.0328011	1	Down	1.65744	7.92092e-32	8:119159855:119162080:+	39416544	4
NONRATT028102.2	44.5	89	0	0	#NAME?	0.00272461	0.294715	Down	1.23476	1.07884e-13	8:119529894:119531389:+	39423773	1
NONRATT028317.2	58.5	117	0	0	#NAME?	0.000957194	0.155902	Down	6.21092	9.46741e-23	8:22125468:22125932:-	39560029	2
NONRATT028520.2	557	76	1038	13.6579	3.77166	0.0014645	0.203689	Up	3.07088	40.844	8:52924220:52925477:-	39694895	2
NONRATT028578.2	51	102	0	0	#NAME?	0.00165593	0.217264	Down	1.27767	4.40997e-12	8:58932576:58935355:-	39733733	2
NONRATT028589.2	433.5	127	740	5.82677	2.5427	0.0277296	0.993366	Up	3.29102	18.7124	8:59782719:59819366:-	39738146	4
NONRATT028618.2	18.5	0	37	Inf	Inf	0.0347368	1	Up	3.42496e-26	1.75432	8:61917977:61918398:-	39751185	1
NONRATT028800.2	40	80	0	0	#NAME?	0.00391939	0.356011	Down	1.90213	4.38576e-13	8:85388352:85391416:-	39870718	2
NONRATT028908.2	31.5	63	0	0	#NAME?	0.00847311	0.526596	Down	0.896952	1.12753e-10	8:109482587:109484035:-	39957635	1
NONRATT029060.2	68	8	128	16	4	0.0240381	0.940937	Up	0.0596846	0.881567	8:122954546:122957477:-	40050408	1
NONRATT029225.2	28.5	57	0	0	#NAME?	0.0114916	0.636077	Down	1.92099	8.84279e-07	9:17790089:17793685:+	40148824	4
NONRATT029305.2	24.5	49	0	0	#NAME?	0.0175781	0.792387	Down	1.76801	2.72835e-12	9:40922306:40922881:+	40199369	1
NONRATT029312.2	17.5	0	35	Inf	Inf	0.0389081	1	Up	0	1.08766	9:42886069:42886725:+	40202639	1
NONRATT029391.2	32	0	64	Inf	Inf	0.00806573	0.514826	Up	1.35283e-05	1.43414	9:61720588:61742991:+	40246159	7
NONRATT029392.2	42	84	0	0	#NAME?	0.00332544	0.327232	Down	2.54457	0.000777403	9:61739631:61742965:+	40246844	3
NONRATT029424.2	19	0	38	Inf	Inf	0.0328011	1	Up	0	2.24779	9:66499407:66501761:+	40268111	2
NONRATT029497.2	41	82	0	0	#NAME?	0.00360803	0.338582	Down	3.23489	1.87422e-11	9:81518251:81533017:+	40333074	4
NONRATT029528.2	42.5	5	80	16	4	0.0472131	1	Up	0.184375	2.80321	9:82393869:82400559:+	40347418	2
NONRATT029562.2	57	114	0	0	#NAME?	0.00106564	0.164132	Down	5.00601	5.51064e-14	9:85547416:85547886:+	40365445	1
NONRATT029606.2	2591	4749	433	0.0911771	-3.45518	0.00136946	0.196013	Down	40.9371	3.65501	9:93068061:93070457:+	40389854	1
NONRATT029665.2	58	107	9	0.0841121	-3.57154	0.0477644	1	Down	5.88194	0.509236	9:98448517:98449659:+	40422297	2
NONRATT029874.2	38	0	76	Inf	Inf	0.0046441	0.378201	Up	8.35213e-32	2.88317	9:29643082:29647909:-	40547452	3
NONRATT029906.2	77.5	13	142	10.9231	3.44931	0.0376736	1	Up	0.19526	2.10482	9:41307747:41311197:-	40569107	3
NONRATT030053.2	92	0	184	Inf	Inf	0.000115527	0.0308871	Up	0	11.9917	9:65413110:65413420:-	40664527	1
NONRATT030154.2	57.5	0	115	Inf	Inf	0.00102806	0.161863	Up	8.27357e-23	7.65999	9:81233469:81258826:-	40739971	2
NONRATT030212.2	141	272	10	0.0367647	-4.76553	0.0022227	0.265023	Down	7.60757	0.260371	9:86046205:86048955:-	40774341	2
NONRATT030247.2	306.5	0	613	Inf	Inf	8.02786e-08	0.000189591	Up	0	15.1064	9:93371671:93374520:-	40796378	6
NONRATT030253.2	33.5	0	67	Inf	Inf	0.00697753	0.4823	Up	3.11215e-10	0.741922	9:94569286:94579807:-	40801624	9
NONRATT030284.2	19	0	38	Inf	Inf	0.0328011	1	Up	2.82133e-24	1.05665	9:98520178:98525142:-	40817526	4
NONRATT030291.2	22.5	45	0	0	#NAME?	0.0219516	0.883677	Down	1.1652	3.36395e-14	9:98550638:98551429:-	40821802	1
NONRATT030354.2	103.5	207	0	0	#NAME?	6.26157e-05	0.0201651	Down	5.42348	0	9:113300831:113301619:-	40871052	1
NONRATT030361.2	35.5	71	0	0	#NAME?	0.005794	0.427609	Down	3.3732	0.00632316	9:113875713:113877524:-	40874574	2
NONRATT030406.2	38	0	76	Inf	Inf	0.0046441	0.378201	Up	1.28446e-05	3.17334	X:1314696:1316683:+	40904136	2
NONRATT030518.2	20.5	0	41	Inf	Inf	0.0275962	0.993366	Up	2.60697e-13	0.548873	X:37221786:37223310:+	40984950	1
NONRATT030586.2	18	0	36	Inf	Inf	0.0367726	1	Up	7.03523e-21	1.84243	X:71336633:71338109:+	41016534	3
NONRATT030722.2	16	0	32	Inf	Inf	0.0460487	1	Up	6.99802e-20	0.878247	7:140980652:140981580:+	38244013	2
NONRATT030735.2	38.5	0	77	Inf	Inf	0.00444877	0.36865	Up	1.27208e-09	4.10489	7:141790231:141822027:+	38250825	3
NONRATT030864.2	85.5	154	17	0.11039	-3.17932	0.0464063	1	Down	8.01676	0.864279	X:10569879:10582322:-	41190730	3
NONRATT030872.2	58.5	116	1	0.00862069	-6.85798	0.00281084	0.299021	Down	6.85886	0.0406583	X:13115938:13116773:-	41195340	2
NONRATT030878.2	128	30	226	7.53333	2.91329	0.0428431	1	Up	0.498017	3.7336	X:14888400:14889626:-	41201078	1
NONRATT031065.2	33.5	2	65	32.5	5.02237	0.0313064	1	Up	0.048159	1.81119	X:72076566:72077591:-	41299690	2
NONRATT031104.2	16.5	33	0	0	#NAME?	0.0435293	1	Down	1.63245	1.00395e-16	X:79840446:79845352:-	41340710	4
NONRATT031119.2	41.5	0	83	Inf	Inf	0.00346335	0.336115	Up	0.000673519	4.27122	X:84766915:84821762:-	41346587	4
NONRATT031359.1	253	435	71	0.163218	-2.61512	0.0367284	1	Down	13.0703	2.08702	1:41594111:41594799:+	41496610	1
NONRATT031567.1	98.5	20	177	8.85	3.14568	0.0411137	1	Up	0.167352	1.41959	1:198162428:198168448:-	41694791	2
NONRATT031710.1	59	116	2	0.0172414	-5.85798	0.00535414	0.412327	Down	0.64476	0.0113218	10:67107926:67128049:-	41811234	2
NONRATT031959.1	22	0	44	Inf	Inf	0.0232343	0.911993	Up	0.00554428	2.29527	14:24182754:24188263:+	42026969	2
NONRATT032185.1	83.5	151	16	0.10596	-3.2384	0.0443547	1	Down	1.529	0.153998	16:49163528:49167325:+	42215773	2
NONRATT032296.1	43.5	87	0	0	#NAME?	0.00294851	0.307209	Down	1.17402	0.00223775	17:21002668:21012515:+	42320135	3
NONRATT032802.1	31.5	63	0	0	#NAME?	0.00847311	0.526596	Down	3.428	0	20:45681158:45684630:+	42679864	3
NONRATT033104.1	590.5	1017	164	0.161259	-2.63255	0.0186985	0.793288	Down	40.7853	6.45091	4:10519977:10582747:-	42891880	3
NONRATT033510.1	392.5	710	75	0.105634	-3.24286	0.00717049	0.489186	Down	3.04079	0.313445	7:2679227:2688967:-	43219299	3
NONRATT033783.1	35	2	68	34	5.08746	0.027761	0.993366	Up	0.149969	4.03626	9:27210508:27213172:-	43442932	2
TCONS_00000036	32	0	64	Inf	Inf	0.00806573	0.514826	Up	0.0176211	3.12744	1:11962868:12009248:+	412	2	XLOC_000022	ENSRNOT00000074325	o
TCONS_00000040	392.5	93	692	7.44086	2.89547	0.0147515	0.736029	Up	4.76996	34.7202	1:11962889:12009248:+	403	2	XLOC_000022	ENSRNOT00000074325	o
TCONS_00000106	300	508	92	0.181102	-2.46512	0.0418984	1	Down	28.6447	5.07109	1:22659784:22662853:+	366	2	XLOC_000044	ENSRNOT00000021896	x
TCONS_00000408	215	424	6	0.0141509	-6.14296	8.22277e-05	0.0247908	Down	30.6176	0.454321	1:83162988:83360156:+	286	2	XLOC_000225	ENSRNOT00000034845	o
TCONS_00001352	11639	19584	3694	0.188623	-2.40642	0.0300378	1	Down	1935.32	357.421	1:243234488:243283679:+	209	3	XLOC_000732	ENSRNOT00000021496	o
TCONS_00001355	9687.5	17992	1383	0.0768675	-3.70148	0.00131544	0.192162	Down	1761.1	132.542	1:243240134:243283685:+	211	2	XLOC_000732	ENSRNOT00000021496	o
TCONS_00001361	5011.5	8706	1317	0.151275	-2.72475	0.010215	0.605633	Down	848.182	125.595	1:243279943:243283685:+	212	2	XLOC_000732	ENSRNOT00000021496	i
TCONS_00002160	68	125	11	0.088	-3.50635	0.0418053	1	Down	2.62796	0.235432	1:90200795:90251546:-	986	2	XLOC_001123	ENSRNOT00000030186	o
TCONS_00002163	157	0	314	Inf	Inf	6.10838e-06	0.0037633	Up	3.38964e-10	6.97893	1:90200872:90251548:-	909	2	XLOC_001123	ENSRNOT00000030186	o
TCONS_00002984	177	354	0	0	#NAME?	2.9562e-06	0.00220471	Down	25.448	0.000112394	1:220166127:220178930:-	287	2	XLOC_001509	ENSRNOT00000026968	o
TCONS_00004724	309	599	19	0.0317195	-4.97848	0.000264181	0.0623907	Down	28.1809	0.865706	10:29301060:29393173:-	439	2	XLOC_002391	ENSRNOT00000005304	o
TCONS_00006154	550.5	25	1076	43.04	5.42761	2.67571e-05	0.0108328	Up	0.231903	9.79198	11:61458195:61511259:-	2221	3	XLOC_003144	ENSRNOT00000046208	o
TCONS_00006156	95	19	171	9	3.16993	0.0415294	1	Up	0.110267	0.963997	11:61462619:61511252:-	3577	2	XLOC_003144	ENSRNOT00000046208	o
TCONS_00006331	133.5	262	5	0.019084	-5.71149	0.000651835	0.124818	Down	3.14491	0.0552945	11:80112639:80122617:-	1722	6	XLOC_003202		u
TCONS_00006378	44.5	89	0	0	#NAME?	0.00272461	0.294715	Down	1.96561	0	11:81721911:81732910:-	938	3	XLOC_003212	ENSRNOT00000078203	i
TCONS_00006538	431.5	784	79	0.100765	-3.31093	0.00559692	0.424109	Down	71.9863	7.05744	12:10291879:10328676:+	225	3	XLOC_003282	ENSRNOT00000092627	x
TCONS_00006539	301	532	70	0.131579	-2.926	0.017796	0.792387	Down	50.377	6.48447	12:10291879:10335041:+	218	3	XLOC_003282	ENSRNOT00000092627	x
TCONS_00006981	34134.5	58985	9284	0.157396	-2.66753	0.0377392	1	Down	5971.69	920.239	12:10323925:10327010:-	204	2	XLOC_003512	ENSRNOT00000071567	i
TCONS_00007462	245.5	72	419	5.81944	2.54088	0.0427964	1	Up	1.38343	7.88182	13:48697355:48709662:+	1074	2	XLOC_003749	ENSRNOT00000075674	o
TCONS_00007545	27.5	1	54	54	5.75489	0.0307074	1	Up	0.0163525	1.13197	13:69006254:69104571:+	967	3	XLOC_003788	ENSRNOT00000003320	o
TCONS_00007719	20.5	41	0	0	#NAME?	0.0275962	0.993366	Down	0.406803	2.97365e-08	13:90533718:90579524:+	2098	2	XLOC_003859	ENSRNOT00000008944	o
TCONS_00008544	46.5	93	0	0	#NAME?	0.00233244	0.273146	Down	4.25896	0	14:46630371:46658598:+	450	3	XLOC_004270	ENSRNOT00000085875	o
TCONS_00008579	273.5	82	465	5.67073	2.50353	0.0419602	1	Up	6.06443	33.8021	14:47732178:48171185:+	278	2	XLOC_004272		u
TCONS_00008661	17	0	34	Inf	Inf	0.0411552	1	Up	0	1.49478	14:81088429:81091258:+	462	3	XLOC_004317	ENSRNOT00000014692	x
TCONS_00008662	46	1	91	91	6.50779	0.00667528	0.472943	Up	0.0402679	2.84002	14:81088429:81091258:+	648	4	XLOC_004317	ENSRNOT00000014692	x
TCONS_00008783	96	172	20	0.116279	-3.10434	0.0446965	1	Down	1.69799	0.192289	14:104708848:104715753:+	2098	2	XLOC_004372		u
TCONS_00009973	1394	476	2312	4.85714	2.28011	0.0284679	0.999721	Up	6.25028	29.734	15:51982865:52010388:-	1572	2	XLOC_004972	ENSRNOT00000013067	o
TCONS_00009974	1394	476	2312	4.85714	2.28011	0.0284679	0.999721	Up	6.25028	29.734	15:51982865:52033052:-	1572	2	XLOC_004972	ENSRNOT00000013067	o
TCONS_00010486	234	1	467	467	8.86728	2.09899e-06	0.00185892	Up	0.0105191	3.95154	16:83954301:83957286:+	2389	2	XLOC_005234		u
TCONS_00010713	53	105	1	0.00952381	-6.71425	0.00407768	0.359708	Down	1.81642	0.0238858	16:49066876:49073429:-	1193	3	XLOC_005371		u
TCONS_00011532	101	0	202	Inf	Inf	7.12159e-05	0.0219376	Up	0	1.1188	17:29531527:29539533:-	3654	3	XLOC_005756	ENSRNOT00000072056	i
TCONS_00012554	91.5	166	17	0.10241	-3.28758	0.0372987	1	Down	2.53963	0.255019	18:55362057:55388798:-	1349	4	XLOC_006209		u
TCONS_00012555	25.5	51	0	0	#NAME?	0.0157824	0.752984	Down	1.22735	1.80784e-05	18:55362063:55389802:-	856	3	XLOC_006209		u
TCONS_00012596	62	0	124	Inf	Inf	0.000748445	0.135968	Up	5.15589e-05	1.89013	18:60619920:60626958:-	1327	4	XLOC_006231	ENSRNOT00000023890	i
TCONS_00012875	2224.5	3603	846	0.234804	-2.09047	0.0408488	1	Down	359.508	82.6309	19:29188469:29254804:+	207	2	XLOC_006350	ENSRNOT00000078023	x
TCONS_00013256	68	130	6	0.0461538	-4.43741	0.0148699	0.736029	Down	1.40211	0.0602811	19:31100988:31110449:-	1913	2	XLOC_006558		u
TCONS_00013774	184	3	365	121.667	6.92679	4.59653e-05	0.015886	Up	0.0187129	1.96962	2:112717824:112729447:+	3746	4	XLOC_006837		u
TCONS_00014061	118.5	220	17	0.0772727	-3.6939	0.0151138	0.738492	Down	7.95019	0.617569	2:194993483:194994154:+	572	2	XLOC_006986		u
TCONS_00014063	56	106	6	0.0566038	-4.14296	0.0280265	0.999219	Down	1.67131	0.0887494	2:195005166:195007038:+	1311	2	XLOC_006987		u
TCONS_00014086	115	226	4	0.0176991	-5.82018	0.000865425	0.146917	Down	3.25648	0.0518327	2:196574679:196585713:+	1435	5	XLOC_007002	ENSRNOT00000081672	x
TCONS_00014281	26.5	1	52	52	5.70044	0.0338016	1	Up	0.00761708	0.365148	2:220519611:220529935:+	2878	3	XLOC_007089	ENSRNOT00000089082	x
TCONS_00014341	75	150	0	0	#NAME?	0.000316438	0.0723214	Down	2.48856	0.000285517	2:241060601:241092582:+	1244	2	XLOC_007124	ENSRNOT00000033413	o
TCONS_00014484	27	54	0	0	#NAME?	0.01345	0.693043	Down	2.06101	0	2:22812845:22819710:-	545	4	XLOC_007197		u
TCONS_00015208	274.5	462	87	0.188312	-2.40881	0.0493636	1	Down	20.5663	3.80581	2:210749471:210750199:-	464	2	XLOC_007544	ENSRNOT00000051261	o
TCONS_00015519	62.5	0	125	Inf	Inf	0.000722962	0.134794	Up	2.96344e-27	8.4038	20:3665677:3677847:+	300	3	XLOC_007674	ENSRNOT00000047663	o
TCONS_00015622	15.5	31	0	0	#NAME?	0.0487343	1	Down	0.435562	0	20:6306144:6310216:+	1484	2	XLOC_007720		u
TCONS_00015851	37	74	0	0	#NAME?	0.00506703	0.40337	Down	1.38365	0	20:46300151:46306002:+	1108	3	XLOC_007849	ENSRNOT00000000340	x
TCONS_00016563	76.5	148	5	0.0337838	-4.88753	0.00718072	0.489186	Down	5.04632	0.161708	3:35904196:36035489:+	607	3	XLOC_008169		u
TCONS_00016564	230.5	404	57	0.141089	-2.82532	0.0276431	0.993366	Down	1.98482	0.272778	3:35904319:36057243:+	4202	3	XLOC_008169		u
TCONS_00016942	252	478	26	0.0543933	-4.20043	0.00188985	0.236984	Down	26.3252	1.4086	3:114276792:114379582:+	375	3	XLOC_008343	ENSRNOT00000046843	o
TCONS_00017051	557.5	963	152	0.15784	-2.66346	0.018176	0.792387	Down	51.3789	7.96769	3:128444679:128485338:+	387	2	XLOC_008401		u
TCONS_00017276	170.5	28	313	11.1786	3.48266	0.0126553	0.679662	Up	2.22501	24.5504	3:164383632:164426007:+	258	2	XLOC_008523	ENSRNOT00000083876	o
TCONS_00017724	71.5	143	0	0	#NAME?	0.000395787	0.0862817	Down	11.6514	0.0206158	3:61869589:61936760:-	254	2	XLOC_008742		u
TCONS_00017777	97.5	175	20	0.114286	-3.12928	0.0425057	1	Down	1.1463	0.127365	3:72147812:72151573:-	3152	2	XLOC_008763		u
TCONS_00018116	59.5	110	9	0.0818182	-3.61143	0.0443431	1	Down	0.997111	0.0777128	3:142197124:142254755:-	2286	2	XLOC_008927		u
TCONS_00018463	127	234	20	0.0854701	-3.54844	0.0169904	0.786777	Down	3.16807	0.268752	4:22008791:22020945:+	1526	4	XLOC_009108		u
TCONS_00018478	99	182	16	0.0879121	-3.50779	0.0252085	0.965417	Down	18.2191	1.61371	4:23548442:23671353:+	206	3	XLOC_009113		u
TCONS_00018509	85.5	168	3	0.0178571	-5.80735	0.00204581	0.24777	Down	1.49466	0.0263652	4:30535032:30544833:+	2317	4	XLOC_009132		u
TCONS_00018513	69	138	0	0	#NAME?	0.00046604	0.0957072	Down	1.28754	2.37625e-12	4:30535097:30544832:+	2207	4	XLOC_009132		u
TCONS_00018515	33.5	67	0	0	#NAME?	0.00697753	0.4823	Down	0.650757	3.15815e-10	4:30535109:30544832:+	2142	5	XLOC_009132		u
TCONS_00018516	31.5	63	0	0	#NAME?	0.00847311	0.526596	Down	0.547732	6.70971e-21	4:30535110:30544832:+	2358	5	XLOC_009132		u
TCONS_00018888	107.5	209	6	0.0287081	-5.1224	0.00247947	0.283339	Down	1.50376	0.0422799	4:122916870:122931408:+	2870	5	XLOC_009326		u
TCONS_00018995	17.5	0	35	Inf	Inf	0.0389081	1	Up	0	2.88849	4:150153639:150185597:+	242	2	XLOC_009381	ENSRNOT00000019778	x
TCONS_00019172	59.5	119	0	0	#NAME?	0.000891663	0.146917	Down	1.29126	4.95184e-05	4:169179877:169181966:+	1908	2	XLOC_009438	ENSRNOT00000011580	o
TCONS_00019388	44.5	86	3	0.0348837	-4.8413	0.0218024	0.883677	Down	3.09722	0.105599	4:39954324:39999613:-	572	4	XLOC_009542		u
TCONS_00019474	464.5	799	130	0.162703	-2.61968	0.0226145	0.905218	Down	10.1858	1.62095	4:63009592:63029378:-	1620	2	XLOC_009589	ENSRNOT00000015808	o
TCONS_00020104	167.5	334	1	0.00299401	-8.3837	1.61303e-05	0.00737311	Down	2.7544	0.00950798	4:179888877:179893930:-	2506	2	XLOC_009867	ENSRNOT00000085386	i
TCONS_00021535	16	0	32	Inf	Inf	0.0460487	1	Up	0	0.844716	5:126120598:126131727:-	755	3	XLOC_010533		u
TCONS_00021919	81	158	4	0.0253165	-5.30378	0.00399577	0.359708	Down	1.68779	0.0416356	5:162805116:162808447:-	1939	2	XLOC_010713		u
TCONS_00022568	41	82	0	0	#NAME?	0.00360803	0.338582	Down	2.66556	0	6:123486347:123490716:+	634	2	XLOC_011034	ENSRNOT00000006604	i
TCONS_00022884	505.5	155	856	5.52258	2.46534	0.0292413	0.999721	Up	1.86378	10.0637	6:33120471:33150560:-	1720	3	XLOC_011190		u
TCONS_00022969	56.5	109	4	0.0366972	-4.76818	0.0150768	0.738492	Down	4.17105	0.158155	6:74248016:74272712:-	542	3	XLOC_011241		u
TCONS_00023284	60	0	120	Inf	Inf	0.000860762	0.146917	Up	0	9.91731	6:128062668:128080900:-	245	2	XLOC_011392	ENSRNOT00000084685	x
TCONS_00023956	64.5	129	0	0	#NAME?	0.000630199	0.122328	Down	2.37916	8.22758e-12	7:123436281:123438607:+	1124	2	XLOC_011747	ENSRNOT00000082603	o
TCONS_00025251	72	7	137	19.5714	4.29068	0.0157685	0.752984	Up	0.544119	11.1171	8:27779298:27824923:+	249	2	XLOC_012346	ENSRNOT00000009825	o
TCONS_00025252	17	34	0	0	#NAME?	0.0411552	1	Down	2.63761	0.00810884	8:27779298:27824928:+	264	2	XLOC_012346	ENSRNOT00000009825	o
TCONS_00025253	19	0	38	Inf	Inf	0.0328011	1	Up	9.04486e-06	2.82818	8:27791848:27824925:+	272	2	XLOC_012346	ENSRNOT00000009825	o
TCONS_00025858	20.5	0	41	Inf	Inf	0.0275962	0.993366	Up	0	3.22986	8:122561912:122596894:+	254	2	XLOC_012652	ENSRNOT00000047198	x
TCONS_00026071	253.5	433	74	0.170901	-2.54877	0.041153	1	Down	1.38925	0.231954	8:33928952:33987272:-	6440	4	XLOC_012754		u
TCONS_00026667	36.5	73	0	0	#NAME?	0.00529615	0.41009	Down	3.24819	1.91285e-05	9:4109939:4113907:+	463	2	XLOC_013056	ENSRNOT00000085330	o
TCONS_00027876	16	0	32	Inf	Inf	0.0460487	1	Up	8.04064e-17	2.17404	X:10796487:10796994:+	295	3	XLOC_013679		u
TCONS_00027887	22	0	44	Inf	Inf	0.0232343	0.911993	Up	2.65076e-12	0.65023	X:14570702:14612577:+	1381	3	XLOC_013684	ENSRNOT00000038994	o

## Sheet: 12h vs 0h
id	baseMean	baseMean_control_0h	baseMean_case_12h	foldChange	log2FoldChange	pval	padj	up_down	expression_0h	expression_12h	locus	length	exon_count	gene_id	nearest_ref	class_code
NONRATT000007.2	93.5	8	179	22.375	4.48382	0.011181	0.558581	Up	0.149072	3.16381	1:1901580:1928246:+	21479469	10
NONRATT000054.2	17.5	0	35	Inf	Inf	0.0452371	1	Up	3.62604e-26	1.30001	1:15819455:15826248:+	21509713	4
NONRATT000055.2	20.5	41	0	0	#NAME?	0.0329189	0.933532	Down	1.5047	2.97137e-15	1:15819783:15826280:+	21510278	4
NONRATT000216.2	1022	252	1792	7.11111	2.83007	0.02454	0.839788	Up	3.97487	27.345	1:53927361:53928670:+	21612076	1
NONRATT000247.2	28.5	0	57	Inf	Inf	0.0143945	0.654697	Up	7.37609e-22	3.11825	1:59145190:59146455:+	21627744	2
NONRATT000311.2	18.5	0	37	Inf	Inf	0.0405966	1	Up	0	3.19922	1:63763815:63766461:+	21645634	2
NONRATT000330.2	363	101	625	6.18812	2.6295	0.0463512	1	Up	5.7888	34.5508	1:74021762:74022123:-	22884958	1
NONRATT000341.2	28	56	0	0	#NAME?	0.0151171	0.666276	Down	2.30374	5.34285e-14	1:73656038:73659710:-	22879485	3
NONRATT000346.2	57	1	113	113	6.82018	0.0042294	0.327227	Up	0.0259234	2.53879	1:73393936:73396095:-	22877638	3
NONRATT000367.2	38.5	76	1	0.0131579	-6.24793	0.0146479	0.657814	Down	2.147	0.0388142	1:72296808:72302822:-	22866897	4
NONRATT000460.2	31	0	62	Inf	Inf	0.0113296	0.558581	Up	4.8167e-31	4.3263	1:81328169:81332405:+	21739316	3
NONRATT000461.2	19.5	39	0	0	#NAME?	0.0365357	0.970376	Down	2.62873	0	1:81370323:81370630:+	21739623	1
NONRATT000501.2	213	426	0	0	#NAME?	4.74949e-06	0.0032197	Down	17.3943	0	1:83946289:83947804:+	21762157	2
NONRATT000544.2	20	0	40	Inf	Inf	0.0346785	0.956751	Up	1.4e-10	1.04552	1:85448890:85455829:+	21784028	9
NONRATT000891.2	36.5	73	0	0	#NAME?	0.00686587	0.423128	Down	2.52787	9.13843e-18	X:156319780:156321939:+	41151899	2
NONRATT000906.2	110.5	18	203	11.2778	3.49541	0.0307013	0.907785	Up	0.415283	4.62584	X:156719591:156720467:+	41161468	1
NONRATT000917.2	17.5	0	35	Inf	Inf	0.0452371	1	Up	2.76653e-19	1.61406	X:157007928:157008733:+	41167234	3
NONRATT000956.2	21.5	0	43	Inf	Inf	0.02965	0.894318	Up	6.73047e-29	2.1149	1:157573427:157654870:+	22010776	4
NONRATT001063.2	628.5	1073	184	0.171482	-2.54387	0.0443074	1	Down	3.76566	0.626015	1:169752034:169757918:+	22083873	1
NONRATT001245.2	23	46	0	0	#NAME?	0.0253082	0.841795	Down	1.08065	0	1:199412836:199420832:+	22195927	8
NONRATT001275.2	35.5	0	71	Inf	Inf	0.00749712	0.452242	Up	0	2.35528	1:201956970:201960559:+	22214644	2
NONRATT001332.2	67.5	0	135	Inf	Inf	0.000794498	0.103766	Up	4.03583e-11	4.34659	1:212618566:212619492:+	22247595	2
NONRATT001403.2	349.5	699	0	0	#NAME?	4.22524e-07	0.000462697	Down	25.7059	9.63823e-11	1:219330187:219335054:+	22285224	3
NONRATT001448.2	45.5	0	91	Inf	Inf	0.00334026	0.273287	Up	0.000421914	1.15873	1:220950797:220952357:+	22313501	1
NONRATT001470.2	26	52	0	0	#NAME?	0.0184935	0.73746	Down	2.7786	2.53827e-20	1:221704480:221705160:+	22325411	2
NONRATT001549.2	74.5	139	10	0.0719424	-3.79701	0.0333524	0.940208	Down	1.52142	0.101256	1:226588138:226596131:+	22376141	2
NONRATT001559.2	47	2	92	46	5.52356	0.014583	0.657814	Up	0.033361	1.6647	1:227585016:227606967:+	22382792	7
NONRATT001590.2	33	0	66	Inf	Inf	0.00939972	0.506873	Up	0.00630229	1.785	1:57382301:57390349:+	21624696	4
NONRATT001650.2	34	0	68	Inf	Inf	0.00857786	0.486512	Up	7.92459e-07	2.96489	1:247125325:247134359:+	22441760	4
NONRATT001672.2	186.5	342	31	0.0906433	-3.46366	0.0193887	0.747191	Down	18.1838	1.58278	1:250426188:250438681:+	22462417	2
NONRATT001673.2	147	31	263	8.48387	3.08472	0.0409031	1	Up	0.414324	3.40165	1:250512249:250513791:+	22463959	1
NONRATT001717.2	689	7	1371	195.857	7.61366	2.65478e-06	0.00188967	Up	0.157138	30.7565	1:258234313:258252793:+	22492211	4
NONRATT001742.2	36	0	72	Inf	Inf	0.00717322	0.438274	Up	9.11994e-09	0.816082	1:261434057:261435821:+	22508836	1
NONRATT001774.2	22.5	0	45	Inf	Inf	0.0266813	0.869187	Up	2.62123e-24	2.30821	1:265100510:265237732:+	22538525	4
NONRATT001822.2	67.5	128	7	0.0546875	-4.19265	0.0249533	0.841795	Down	11.1704	0.627706	1:266476428:266477166:+	22565433	2
NONRATT001827.2	51.5	103	0	0	#NAME?	0.0021851	0.207381	Down	5.60803	0	1:266506239:266506619:+	22568872	1
NONRATT001930.2	113	0	226	Inf	Inf	9.13782e-05	0.0260172	Up	2.97525e-06	5.93982	1:2000374:2001227:-	22637129	2
NONRATT001976.2	21.5	43	0	0	#NAME?	0.02965	0.894318	Down	1.46818	4.59382e-25	1:13384155:13384758:-	22664590	1
NONRATT002017.2	38	0	76	Inf	Inf	0.00603459	0.399574	Up	7.04278e-14	2.59506	1:24327314:24327902:-	22694298	1
NONRATT002072.2	19	0	38	Inf	Inf	0.0385032	0.989408	Up	3.8833e-30	0.710722	1:37803552:37814386:-	22735547	4
NONRATT002087.2	18	0	36	Inf	Inf	0.0428337	1	Up	6.87549e-29	2.02589	1:37988340:38009451:-	22744677	4
NONRATT002402.2	25.5	51	0	0	#NAME?	0.0194723	0.747191	Down	1.42264	2.71396e-16	1:82115088:82115825:-	22932978	1
NONRATT002687.2	141855	395	283315	717.253	9.48634	0.0147623	0.66087	Up	20.6608	14323.9	1:102786004:102788504:-	23084912	3
NONRATT002761.2	107	3	211	70.3333	6.13614	0.00137949	0.153426	Up	0.101611	7.52628	1:134873405:134885529:-	23132742	4
NONRATT002857.2	57	114	0	0	#NAME?	0.00151546	0.162267	Down	2.14125	0.001001	1:146746269:146812587:-	23194947	7
NONRATT002862.2	37	71	3	0.0422535	-4.56478	0.0432201	1	Down	2.0757	0.0990188	1:146748695:146823762:-	23198362	6
NONRATT002870.2	120.5	217	24	0.110599	-3.17659	0.0426765	1	Down	9.10121	0.971656	X:152928860:152932819:-	41451133	4
NONRATT002896.2	20	40	0	0	#NAME?	0.0346785	0.956751	Down	0.549946	4.24662e-13	X:157073859:157081220:-	41465138	4
NONRATT002911.2	46	88	4	0.0454545	-4.45943	0.0338518	0.946785	Down	3.72297	0.14441	1:151494211:151494924:-	23203908	2
NONRATT003173.2	27	54	0	0	#NAME?	0.0167029	0.705585	Down	2.81918	1.98306e-16	1:198119515:198120027:-	23375421	2
NONRATT003212.2	21.5	0	43	Inf	Inf	0.02965	0.894318	Up	2.42173e-25	2.05092	1:198866277:198868667:-	23402880	2
NONRATT003302.2	28	0	56	Inf	Inf	0.0151171	0.666276	Up	6.46814e-28	3.85023	1:209810348:209810638:-	23461247	1
NONRATT003379.2	298	47	549	11.6809	3.54607	0.0114312	0.561153	Up	0.688907	7.84517	1:216776029:216777427:-	23507330	1
NONRATT003484.2	39.5	79	0	0	#NAME?	0.00532307	0.369655	Down	1.63714	1.68021e-10	1:221346080:221348944:-	23559104	4
NONRATT003515.2	21.5	0	43	Inf	Inf	0.02965	0.894318	Up	6.16117e-18	2.14124	1:222232350:222233696:-	23572623	4
NONRATT003567.2	57.5	4	111	27.75	4.79442	0.0179518	0.73649	Up	0.1453	3.94333	1:226548541:226572396:-	23602415	2
NONRATT003569.2	93	186	0	0	#NAME?	0.000212429	0.0458204	Down	3.86166	0.00903731	1:226601488:226605762:-	23603410	4
NONRATT003668.2	17.5	35	0	0	#NAME?	0.0452371	1	Down	2.56095	2.46456e-16	1:242582582:242607982:-	23662429	2
NONRATT003682.2	242	63	421	6.68254	2.7404	0.0478068	1	Up	2.32055	15.1077	1:245476402:245482170:-	23670435	3
NONRATT003706.2	17.5	0	35	Inf	Inf	0.0452371	1	Up	3.31353e-20	1.35108	1:248297664:248298838:-	23688060	2
NONRATT003723.2	125	0	250	Inf	Inf	5.82626e-05	0.019289	Up	2.36284e-07	3.12906	1:253119110:253122079:-	23701227	2
NONRATT003806.2	66	132	0	0	#NAME?	0.000867668	0.109311	Down	2.96577	5.41573e-20	1:263778528:263781165:-	23750260	3
NONRATT003809.2	19	38	0	0	#NAME?	0.0385032	0.989408	Down	1.2008	2.57308e-16	1:263789839:263796387:-	23751663	4
NONRATT003860.2	18.5	37	0	0	#NAME?	0.0405966	1	Down	1.18809	1.27048e-14	1:266048832:266051081:-	23783138	2
NONRATT004035.2	32.5	63	2	0.031746	-4.97728	0.0406832	1	Down	1.4916	0.0540332	10:730264:750635:+	23854693	4
NONRATT004060.2	247	474	20	0.0421941	-4.56682	0.00248906	0.230093	Down	4.16876	0.166585	10:13153814:13156163:+	23915592	1
NONRATT004090.2	2285.5	0	4571	Inf	Inf	3.93748e-10	5.60539e-06	Up	2.30143e-08	257.867	10:14088653:14090018:+	23929709	5
NONRATT004096.2	248.5	0	497	Inf	Inf	2.24157e-06	0.00167952	Up	1.23985e-08	19.8086	10:14257631:14258132:+	23932623	1
NONRATT004312.2	120	8	232	29	4.85798	0.00475517	0.349472	Up	0.686898	20.1334	10:43511327:43511557:+	24068324	1
NONRATT004323.2	41.5	0	83	Inf	Inf	0.00453023	0.343655	Up	3.81157e-10	2.74571	10:43768708:43769771:+	24074839	2
NONRATT004383.2	504.5	54	955	17.6852	4.14447	0.00261529	0.237142	Up	0.957028	16.5169	10:49307129:49310400:+	24118026	2
NONRATT004394.2	55	0	110	Inf	Inf	0.00172766	0.178225	Up	2.03746e-21	8.48692	10:52208249:52208507:+	24123407	1
NONRATT004422.2	81.5	163	0	0	#NAME?	0.000370434	0.0684869	Down	5.57161	9.43669e-06	10:54529364:54753303:+	24141538	5
NONRATT004628.2	1652	2905	399	0.137349	-2.86408	0.0230292	0.803538	Down	133.618	17.7578	10:64950847:64953915:-	25000093	2
NONRATT004711.2	21.5	0	43	Inf	Inf	0.02965	0.894318	Up	6.0771e-43	3.45105	10:75678951:75716190:-	25076681	3
NONRATT004835.2	100	0	200	Inf	Inf	0.000155582	0.0369144	Up	1.24268e-10	14.8789	10:86168083:86168351:+	24444683	1
NONRATT004982.2	33.5	1	66	66	6.04439	0.0219014	0.785361	Up	0.00763191	0.667088	10:94252069:94254046:+	24531121	1
NONRATT005067.2	17	34	0	0	#NAME?	0.0478397	1	Down	2.29959	4.0896e-28	10:104201938:104253422:-	25326304	2
NONRATT005117.2	36.5	0	73	Inf	Inf	0.00686587	0.423128	Up	1.55737e-26	2.68524	10:107025777:107030208:+	24614272	2
NONRATT005222.2	190	0	380	Inf	Inf	8.24393e-06	0.00434669	Up	0.000353756	19.1158	10:11990579:11994459:-	24682936	5
NONRATT005234.2	19	38	0	0	#NAME?	0.0385032	0.989408	Down	1.72654	8.64309e-26	10:12887367:12888596:-	24687591	4
NONRATT005261.2	222.5	7	438	62.5714	5.96743	0.000326542	0.063951	Up	0.71033	42.4511	10:14087497:14087938:-	24707493	2
NONRATT005309.2	162.5	17	308	18.1176	4.17932	0.00775485	0.461113	Up	0.629363	11.3375	10:15417622:15431869:-	24740818	2
NONRATT005316.2	61.5	121	2	0.0165289	-5.91886	0.00621862	0.407276	Down	5.02847	0.06911	10:15686003:15689155:-	24742421	4
NONRATT005328.2	22.5	45	0	0	#NAME?	0.0266813	0.869187	Down	1.11303	0	10:16769853:16774901:-	24752314	2
NONRATT005357.2	102.5	19	186	9.78947	3.29123	0.0426588	1	Up	0.316391	3.02849	10:25860699:25861923:-	24768005	1
NONRATT005359.2	33.5	0	67	Inf	Inf	0.00897791	0.491575	Up	7.31755e-20	1.65167	10:25873592:25874402:-	24768815	1
NONRATT005389.2	103.5	207	0	0	#NAME?	0.000134082	0.0334875	Down	14.6731	4.49686e-10	10:35737593:35737885:-	24791365	1
NONRATT005391.2	29	1	57	57	5.83289	0.032206	0.92999	Up	0.00411624	0.325025	10:35765708:35775683:-	24795427	4
NONRATT005432.2	60	0	120	Inf	Inf	0.00125117	0.14481	Up	2.94497e-12	2.3237	10:40056227:40122862:-	24820245	6
NONRATT005435.2	25	0	50	Inf	Inf	0.0205104	0.764361	Up	4.93415e-31	3.83067	10:40281690:40297913:-	24822942	3
NONRATT005478.2	20.5	0	41	Inf	Inf	0.0329189	0.933532	Up	8.4121e-15	0.466985	10:45833260:45835013:-	24844963	1
NONRATT005531.2	39	0	78	Inf	Inf	0.00554812	0.383413	Up	8.26901e-12	3.58707	10:50366946:50367381:-	24884665	1
NONRATT005551.2	21	0	42	Inf	Inf	0.0312457	0.907785	Up	5.22655e-24	2.34385	10:53583267:53583623:-	24893348	1
NONRATT005557.2	32.5	65	0	0	#NAME?	0.0098445	0.513356	Down	1.71499	3.66585e-07	10:55430432:55482483:-	24898035	5
NONRATT005581.2	22	0	44	Inf	Inf	0.028128	0.880728	Up	4.66307e-33	0.631735	10:56280977:56283467:-	24912685	3
NONRATT005699.2	129	17	241	14.1765	3.82543	0.016843	0.705907	Up	0.160955	2.15012	10:64362876:64367683:+	24269127	5
NONRATT005728.2	42	0	84	Inf	Inf	0.00435563	0.333369	Up	0	2.33536	10:63627635:63628354:+	24253850	1
NONRATT005772.2	77	0	154	Inf	Inf	0.000468187	0.0793465	Up	2.65626e-16	5.52928	10:67753080:67753637:-	25026477	1
NONRATT005784.2	72	0	144	Inf	Inf	0.000614689	0.0892931	Up	1.03668e-12	1.5574	10:70157529:70159381:-	25035976	1
NONRATT005847.2	23	46	0	0	#NAME?	0.0253082	0.841795	Down	1.84061	8.0625e-14	10:74883461:74884200:+	24349780	2
NONRATT005865.2	195	355	35	0.0985915	-3.34239	0.0223833	0.796626	Down	5.34329	0.503771	10:77836345:77837717:-	25085290	1
NONRATT005866.2	434.5	779	90	0.115533	-3.11363	0.018933	0.747191	Down	14.1612	1.58802	10:77838375:77839511:-	25086426	1
NONRATT005889.2	119.5	0	239	Inf	Inf	7.12946e-05	0.0224809	Up	7.34775e-10	9.43896	10:81999768:82026736:-	25101783	6
NONRATT005949.2	197.5	0	395	Inf	Inf	6.84325e-06	0.00405919	Up	0.0106296	11.5633	10:85096508:85099341:-	25136346	3
NONRATT006021.2	28.5	57	0	0	#NAME?	0.0143945	0.654697	Down	3.02283	1.44072e-19	10:88433865:88434704:-	25181287	2
NONRATT006082.2	30	0	60	Inf	Inf	0.0124592	0.599219	Up	7.33969e-05	3.53794	10:90260896:90263205:-	25215115	3
NONRATT006175.2	145	0	290	Inf	Inf	2.95594e-05	0.0116891	Up	0.000852923	1.82891	10:94588554:94591722:-	25274192	1
NONRATT006212.2	412.5	47	778	16.5532	4.04904	0.00363426	0.292301	Up	0.538396	8.699	10:97733700:97735485:-	25296103	1
NONRATT006242.2	150.5	301	0	0	#NAME?	2.4863e-05	0.0104103	Down	14.2177	0.000132011	10:102244679:102245116:-	25314134	1
NONRATT006258.2	32.5	65	0	0	#NAME?	0.0098445	0.513356	Down	2.19762	0.00740425	10:104512808:104513681:+	24591568	2
NONRATT006315.2	513	129	897	6.95349	2.79774	0.0305059	0.907785	Up	4.80575	32.3488	10:106973848:106974402:-	25364301	1
NONRATT006393.2	30.5	0	61	Inf	Inf	0.0118794	0.581153	Up	4.37858e-09	2.53262	10:112564197:112564679:-	25413728	1
NONRATT006407.2	198.5	27	370	13.7037	3.77649	0.0113396	0.558581	Up	0.804191	10.7227	11:20982889:20987482:+	25425451	2
NONRATT006443.2	111.5	223	0	0	#NAME?	9.69163e-05	0.0270529	Down	11.0929	2.04804e-08	11:31806635:31812815:+	25450850	3
NONRATT006490.2	328	577	79	0.136915	-2.86865	0.0330819	0.934431	Down	4.77065	0.629599	11:35586020:35588517:+	25490564	1
NONRATT006530.2	502	125	879	7.032	2.81394	0.0299042	0.900034	Up	2.93001	19.8953	11:46205838:46206720:+	25515557	1
NONRATT006625.2	25	0	50	Inf	Inf	0.0205104	0.764361	Up	5.18467e-21	3.04548	11:69289054:69289385:+	25579634	1
NONRATT006699.2	7341.5	1085	13598	12.5327	3.64763	0.0112472	0.558581	Up	18.1541	220.062	11:81515844:81517078:+	25620303	1
NONRATT006707.2	19	38	0	0	#NAME?	0.0385032	0.989408	Down	2.01126	4.21496e-28	11:82384280:82385297:+	25625276	2
NONRATT006744.2	167.5	306	29	0.0947712	-3.39941	0.0234854	0.81546	Down	4.44657	0.405973	11:87072456:87074050:+	25644973	2
NONRATT006783.2	19.5	0	39	Inf	Inf	0.0365357	0.970376	Up	1.90288e-22	1.11887	11:1814661:1818923:-	25669005	2
NONRATT006873.2	21	42	0	0	#NAME?	0.0312457	0.907785	Down	3.19803	1.80959e-25	11:31788282:31788553:-	25728041	1
NONRATT006955.2	48	0	96	Inf	Inf	0.00278776	0.244979	Up	0	2.67704	11:49707733:49708735:-	25776847	2
NONRATT007057.2	25	50	0	0	#NAME?	0.0205104	0.764361	Down	2.99528	2.08496e-22	11:70570446:70570791:-	25848595	1
NONRATT007058.2	236.5	1	472	472	8.88264	1.06635e-05	0.00506021	Up	0.00949383	6.03564	11:70693375:70703646:-	25850156	5
NONRATT007126.2	13397.5	2272	24523	10.7936	3.4321	0.0270964	0.873993	Up	113.603	1185.79	11:81421672:81423274:-	25905719	2
NONRATT007128.2	35	0	70	Inf	Inf	0.00783853	0.461113	Up	8.82106e-17	5.517	11:81432992:81444208:-	25905974	4
NONRATT007167.2	26	0	52	Inf	Inf	0.0184935	0.73746	Up	1.11934e-13	3.19581	11:85322462:85322787:-	25930924	1
NONRATT007205.2	68.5	0	137	Inf	Inf	0.000749723	0.0997482	Up	6.56084e-09	2.50666	12:789512:792039:+	25956871	2
NONRATT007274.2	87.5	164	11	0.0670732	-3.89812	0.0243842	0.836467	Down	5.3558	0.349377	12:12338897:12339530:+	25999353	1
NONRATT007458.2	22.5	45	0	0	#NAME?	0.0266813	0.869187	Down	1.83921	4.12257e-07	12:36642113:36642735:+	26115054	2
NONRATT007487.2	66.5	3	130	43.3333	5.43741	0.00774712	0.461113	Up	0.0722563	3.47986	12:38161647:38162391:+	26128460	1
NONRATT007498.2	156.5	0	313	Inf	Inf	2.07095e-05	0.00893396	Up	2.67584e-05	2.22212	12:38411658:38452648:+	26139452	11
NONRATT007527.2	21	0	42	Inf	Inf	0.0312457	0.907785	Up	0	2.85609	12:39506747:39507393:+	26153988	2
NONRATT007530.2	575	8	1142	142.75	7.15735	7.77215e-06	0.00425555	Up	0.279535	36.6231	12:39599116:39599823:+	26155270	2
NONRATT007640.2	38	0	76	Inf	Inf	0.00603459	0.399574	Up	0.00391783	1.43471	12:49552070:49557535:+	26219186	5
NONRATT007748.2	77	0	154	Inf	Inf	0.000468187	0.0793465	Up	8.27621e-21	6.48733	12:11252299:11252981:-	26293606	3
NONRATT007757.2	202.5	4	401	100.25	6.64746	0.000159881	0.0373055	Up	0.0466141	4.26242	12:12409870:12411750:-	26300214	1
NONRATT008016.2	151.5	298	5	0.0167785	-5.89724	0.000812288	0.105125	Down	8.73586	0.134502	12:41623687:41624501:-	26459079	2
NONRATT008097.2	109.5	0	219	Inf	Inf	0.000104926	0.0281835	Up	1.5352e-08	17.3645	12:51335029:51341712:-	26506296	3
NONRATT008127.2	179.5	28	331	11.8214	3.56333	0.0173057	0.720364	Up	2.13192	24.0973	13:12298542:12298816:+	26524583	1
NONRATT008180.2	192.5	385	0	0	#NAME?	7.74214e-06	0.00425555	Down	10.7419	0.00194518	13:44974929:44986951:+	26559858	5
NONRATT008290.2	25.5	51	0	0	#NAME?	0.0194723	0.747191	Down	1.80255	5.0047e-14	13:62606859:62653183:+	26631155	3
NONRATT008306.2	175.5	42	309	7.35714	2.87915	0.0477592	1	Up	0.630769	4.50644	13:69101912:69103283:+	26641772	1
NONRATT008373.2	25.5	0	51	Inf	Inf	0.0194723	0.747191	Up	4.18328e-09	1.44469	13:78853131:78854210:+	26689776	3
NONRATT008382.2	36.5	0	73	Inf	Inf	0.00686587	0.423128	Up	3.57439e-16	1.84699	13:78886158:78892679:+	26696764	3
NONRATT008391.2	1670	212	3128	14.7547	3.8831	0.00321396	0.266506	Up	5.36753	76.5542	13:79204474:79205290:+	26703534	1
NONRATT008451.2	139.5	12	267	22.25	4.47573	0.00625007	0.407276	Up	0.550036	12.1082	13:89742337:89742777:+	26741642	1
NONRATT008543.2	136.5	0	273	Inf	Inf	3.90497e-05	0.0137888	Up	0.000189646	10.9385	13:103406815:103407314:+	26795569	1
NONRATT008544.2	17.5	35	0	0	#NAME?	0.0452371	1	Down	0.359814	0.000869879	13:103408353:103410345:+	26797561	1
NONRATT008595.2	17.5	35	0	0	#NAME?	0.0452371	1	Down	2.57933	3.03691e-05	13:1291952:1729534:-	26835422	3
NONRATT008615.2	36.5	0	73	Inf	Inf	0.00686587	0.423128	Up	6.41619e-06	3.28756	13:17628403:17639054:-	26842962	2
NONRATT008704.2	49.5	95	4	0.0421053	-4.56986	0.0277079	0.880728	Down	1.36655	0.0536846	13:49796548:49806857:-	26904347	4
NONRATT008709.2	27	54	0	0	#NAME?	0.0167029	0.705585	Down	3.41187	5.33557e-21	13:50557668:50558087:-	26909440	2
NONRATT008761.2	28	56	0	0	#NAME?	0.0151171	0.666276	Down	0.532705	5.88148e-09	13:53750469:53752636:-	26943374	1
NONRATT008780.2	228.5	441	16	0.0362812	-4.78463	0.00193813	0.193807	Down	21.7763	0.763471	13:56993003:57030242:-	26955547	3
NONRATT008821.2	33.5	0	67	Inf	Inf	0.00897791	0.491575	Up	1.21232e-26	1.84298	13:70744408:70745144:-	26986359	2
NONRATT008895.2	21.5	43	0	0	#NAME?	0.02965	0.894318	Down	0.788291	3.20605e-21	13:80712880:80713998:-	27041156	1
NONRATT009065.2	32.5	65	0	0	#NAME?	0.0098445	0.513356	Down	3.41367	7.17822e-10	13:99509698:99522200:-	27148981	3
NONRATT009088.2	33.5	0	67	Inf	Inf	0.00897791	0.491575	Up	2.06217e-25	3.74474	13:101502727:101509103:-	27161694	2
NONRATT009123.2	17.5	0	35	Inf	Inf	0.0452371	1	Up	1.0077e-31	2.02522	13:109820614:109849623:-	27179753	3
NONRATT009127.2	149.5	21	278	13.2381	3.72662	0.0164138	0.705585	Up	0.680654	8.69563	13:110005607:110006245:-	27181420	1
NONRATT009174.2	19	38	0	0	#NAME?	0.0385032	0.989408	Down	2.08517	0	14:2391740:2392116:+	27209213	1
NONRATT009189.2	45.5	91	0	0	#NAME?	0.00334026	0.273287	Down	0.994057	1.90143e-07	14:3680661:3682553:+	27216814	1
NONRATT009298.2	32	0	64	Inf	Inf	0.0103135	0.530047	Up	0.00101815	2.51542	14:33067429:33070179:+	27292787	3
NONRATT009365.2	21	42	0	0	#NAME?	0.0312457	0.907785	Down	1.67418	2.83775e-26	14:44496823:44498197:+	27337047	2
NONRATT009432.2	26	0	52	Inf	Inf	0.0184935	0.73746	Up	2.21653e-30	4.42859	14:73893666:73899279:+	27374062	3
NONRATT009471.2	152.5	35	270	7.71429	2.94753	0.0479864	1	Up	2.15898	15.9763	14:81428174:81428511:+	27397483	1
NONRATT009576.2	21	0	42	Inf	Inf	0.0312457	0.907785	Up	1.96808e-08	2.30617	14:99774608:99779323:-	27852395	4
NONRATT009626.2	90	12	168	14	3.80735	0.0262115	0.867785	Up	0.636274	8.43225	14:107617513:107617910:+	27493075	1
NONRATT009663.2	74.5	149	0	0	#NAME?	0.000535584	0.0843475	Down	3.86623	0.000107597	14:115262156:115267722:+	27524641	4
NONRATT009668.2	18	36	0	0	#NAME?	0.0428337	1	Down	1.42602	5.87831e-08	14:4608:212674:-	27527351	2
NONRATT009709.2	76.5	140	13	0.0928571	-3.42884	0.0485402	1	Down	11.4183	1.03766	14:5451201:5451455:-	27558216	1
NONRATT009793.2	295	590	0	0	#NAME?	9.67662e-07	0.000778151	Down	28.3946	0.0033246	14:19028809:19029238:-	27622718	1
NONRATT009875.2	72	0	144	Inf	Inf	0.000614689	0.0892931	Up	2.22575e-10	6.23363	14:42476229:42491422:-	27676536	7
NONRATT009925.2	18	36	0	0	#NAME?	0.0428337	1	Down	1.28291	1.00058e-31	14:56912271:56912858:-	27707774	2
NONRATT009965.2	114.5	226	3	0.0132743	-6.23522	0.00105952	0.127824	Down	14.8705	0.205113	14:71261399:71261713:-	27731757	1
NONRATT010108.2	20.5	41	0	0	#NAME?	0.0329189	0.933532	Down	0.508382	6.07074e-06	14:85357220:85358884:-	27822496	1
NONRATT010181.2	19.5	0	39	Inf	Inf	0.0365357	0.970376	Up	1.50108e-22	1.98228	14:106317885:106318279:-	27867779	1
NONRATT010196.2	35.5	71	0	0	#NAME?	0.00749712	0.452242	Down	6.02836	4.84566e-58	14:110728075:110728318:-	27879362	1
NONRATT010217.2	24	48	0	0	#NAME?	0.0227751	0.796626	Down	2.1133	2.8303e-05	14:115006910:115052456:-	27892246	4
NONRATT010360.2	480	960	0	0	#NAME?	9.22618e-08	0.000218906	Down	75.088	5.68119e-08	15:27875918:27879677:+	27985416	2
NONRATT010364.2	97	186	8	0.0430108	-4.53916	0.00989714	0.514218	Down	5.61187	0.240793	15:28017994:28034568:+	27987717	3
NONRATT010431.2	117.5	0	235	Inf	Inf	7.68642e-05	0.0232817	Up	1.25675e-11	6.61249	15:34164603:34167066:+	28025033	3
NONRATT010643.2	48	96	0	0	#NAME?	0.00278776	0.244979	Down	6.32369	0.0248445	15:83638190:83638505:+	28153034	1
NONRATT010832.2	71.5	132	11	0.0833333	-3.58496	0.0440393	1	Down	3.20313	0.266456	15:28307786:28313862:-	28261942	12
NONRATT010913.2	48.5	6	91	15.1667	3.92283	0.0498815	1	Up	0.191715	2.61443	15:34473037:34474447:-	28318394	4
NONRATT010948.2	33	0	66	Inf	Inf	0.00939972	0.506873	Up	6.47988e-10	2.34391	15:38113401:38130925:-	28339905	5
NONRATT010985.2	62.5	0	125	Inf	Inf	0.00107128	0.128157	Up	4.35874e-32	7.82954	15:41669506:41672032:-	28360298	2
NONRATT011058.2	331.5	583	80	0.137221	-2.86542	0.0330701	0.934431	Down	19.2337	2.56661	15:51974043:51974669:-	28409221	1
NONRATT011084.2	174.5	28	321	11.4643	3.51907	0.0189817	0.747191	Up	0.992909	10.9732	15:55658408:55769598:-	28423028	2
NONRATT011251.2	76.5	147	6	0.0408163	-4.61471	0.0132799	0.628887	Down	5.29593	0.213049	16:3100204:3101927:+	28536536	3
NONRATT011287.2	86.5	173	0	0	#NAME?	0.000288797	0.0595843	Down	4.17329	0	16:7344653:7345508:+	28560067	1
NONRATT011388.2	59	118	0	0	#NAME?	0.00133282	0.152116	Down	7.36693	4.62004e-07	16:20025594:20025925:+	28627342	1
NONRATT011433.2	39.5	79	0	0	#NAME?	0.00532307	0.369655	Down	1.9335	7.58616e-13	16:21263999:21266056:+	28661317	2
NONRATT011444.2	44	85	3	0.0352941	-4.82443	0.027187	0.873993	Down	3.10495	0.121261	16:21606999:21607563:+	28667776	1
NONRATT011510.2	157.5	301	14	0.0465116	-4.42626	0.00564575	0.388275	Down	7.92907	0.344146	16:49103477:49107629:+	28707312	2
NONRATT011511.2	356.5	656	57	0.0868902	-3.52466	0.0103844	0.53177	Down	18.0251	1.5067	16:49163593:49169307:+	28708064	3
NONRATT011638.2	1023.5	20	2027	101.35	6.6632	1.04988e-05	0.00506021	Up	0.242592	23.6562	16:74552812:74554523:+	28788840	1
NONRATT011666.2	22	0	44	Inf	Inf	0.028128	0.880728	Up	1.3441e-10	1.55147	16:81782490:81783052:+	28802596	1
NONRATT011761.2	122	241	3	0.0124481	-6.32793	0.0008237	0.105641	Down	7.19595	0.0931419	16:7741976:7758100:-	28856108	5
NONRATT011762.2	323	560	86	0.153571	-2.70302	0.043492	1	Down	16.5858	2.4573	16:7745610:7758332:-	28856805	5
NONRATT011803.2	19	38	0	0	#NAME?	0.0385032	0.989408	Down	1.54202	7.26623e-11	16:9862178:9862691:-	28874958	1
NONRATT011819.2	43	0	86	Inf	Inf	0.00403081	0.315289	Up	1.71403e-29	3.07901	16:19046025:19052027:-	28897313	2
NONRATT012033.2	19.5	0	39	Inf	Inf	0.0365357	0.970376	Up	0	1.32108	16:59364459:59366772:-	29028380	3
NONRATT012050.2	44	88	0	0	#NAME?	0.00373539	0.298747	Down	4.17773	6.62079e-14	16:68390462:68390897:-	29033949	1
NONRATT012139.2	77.5	155	0	0	#NAME?	0.000455936	0.0791549	Down	9.84759	1.55482e-12	16:81784347:81784673:-	29087049	1
NONRATT012167.2	62	1	123	123	6.94251	0.00314749	0.264264	Up	0.0295902	3.25247	16:88344424:88345177:-	29099916	1
NONRATT012182.2	97	179	15	0.0837989	-3.57693	0.0317523	0.918752	Down	3.56459	0.282214	17:824043:825078:+	29109117	1
NONRATT012253.2	24.5	49	0	0	#NAME?	0.0216105	0.780829	Down	2.52803	1.69366e-14	17:9109696:9110258:+	29150667	2
NONRATT012412.2	62.5	1	124	124	6.9542	0.00305825	0.260993	Up	0.0186601	3.23974	17:30571948:30573328:+	29250782	2
NONRATT012539.2	26	52	0	0	#NAME?	0.0184935	0.73746	Down	2.54966	1.35238e-13	17:44791462:44793762:-	29610680	2
NONRATT012579.2	99	0	198	Inf	Inf	0.000162471	0.0373055	Up	0.000603894	5.97845	17:69377547:69379938:+	29354403	3
NONRATT012586.2	89.5	0	179	Inf	Inf	0.000250069	0.0523527	Up	7.46503e-10	2.5912	17:70297312:70298695:+	29360335	1
NONRATT012614.2	17.5	0	35	Inf	Inf	0.0452371	1	Up	2.11102e-20	0.900791	17:76358909:76379748:+	29376451	6
NONRATT012626.2	25.5	0	51	Inf	Inf	0.0194723	0.747191	Up	2.47548e-08	2.15517	17:77601852:77605886:+	29382902	3
NONRATT012636.2	418	0	836	Inf	Inf	1.77855e-07	0.000259082	Up	2.70561e-05	19.9276	17:80887573:80891202:+	29389167	5
NONRATT012653.2	30	1	59	59	5.88264	0.0295158	0.894318	Up	0.0674445	5.43487	17:84608876:84609093:+	29399746	1
NONRATT012678.2	110.5	211	10	0.0473934	-4.39917	0.0096779	0.513356	Down	7.33431	0.321086	17:89984893:90017441:+	29418080	5
NONRATT012705.2	38.5	77	0	0	#NAME?	0.00578507	0.390314	Down	0.862189	5.63318e-05	17:1029241:1031079:-	29434582	2
NONRATT012724.2	22.5	45	0	0	#NAME?	0.0266813	0.869187	Down	1.34429	2.3214e-25	17:3718225:3718933:-	29447850	2
NONRATT012767.2	53	104	2	0.0192308	-5.70044	0.0101111	0.522769	Down	3.17302	0.0703903	17:8567014:8567690:-	29471686	1
NONRATT012768.2	54.5	103	6	0.0582524	-4.10154	0.0366086	0.970502	Down	8.02757	0.433483	17:8570459:8576202:-	29471950	2
NONRATT012769.2	24	48	0	0	#NAME?	0.0227751	0.796626	Down	2.46437	0	17:8594436:8607618:-	29472351	4
NONRATT012872.2	363.5	682	45	0.0659824	-3.92177	0.0050702	0.365518	Down	28.8812	1.838	17:21981946:21982434:-	29540850	1
NONRATT013068.2	55.5	4	107	26.75	4.74147	0.0199585	0.759703	Up	0.171401	4.08344	17:63859963:63913813:-	29660579	4
NONRATT013083.2	1161	2250	72	0.032	-4.96578	0.000340579	0.06552	Down	40.8654	1.26996	17:69639276:69642741:-	29671319	3
NONRATT013084.2	239	463	15	0.0323974	-4.94798	0.00139616	0.154076	Down	15.3882	0.4967	17:69640046:69648665:-	29671941	6
NONRATT013085.2	555.5	1078	33	0.0306122	-5.02975	0.000437579	0.0769059	Down	31.0488	0.910437	17:69640079:69683675:-	29672658	6
NONRATT013086.2	22	44	0	0	#NAME?	0.028128	0.880728	Down	1.45677	0	17:69667521:69668145:-	29673282	1
NONRATT013215.2	26	0	52	Inf	Inf	0.0184935	0.73746	Up	1.14727e-17	2.98561	18:3566111:3574005:+	29755463	3
NONRATT013223.2	164	310	18	0.0580645	-4.1062	0.00853406	0.486512	Down	10.3983	0.58079	18:3930972:3937735:+	29761045	5
NONRATT013291.2	912.5	1623	202	0.124461	-3.00624	0.0180104	0.736772	Down	45.9217	5.52766	18:25066908:25067638:+	29807981	2
NONRATT013309.2	18.5	0	37	Inf	Inf	0.0405966	1	Up	5.37939e-30	1.43617	18:26569183:26569697:+	29824717	1
NONRATT013333.2	56	0	112	Inf	Inf	0.00161761	0.169325	Up	2.92134e-10	2.95268	18:28383053:28386632:+	29839090	2
NONRATT013396.2	23.5	0	47	Inf	Inf	0.0240069	0.827421	Up	7.73445e-22	2.94765	18:33471201:33707854:+	29883408	2
NONRATT013472.2	397	754	40	0.0530504	-4.23649	0.00265946	0.239621	Down	45.5581	2.34451	18:55498331:55506250:+	29933716	2
NONRATT013473.2	282	491	73	0.148676	-2.74975	0.0433099	1	Down	7.09114	1.02149	18:55585581:55587010:+	29935145	1
NONRATT013587.2	20.5	41	0	0	#NAME?	0.0329189	0.933532	Down	0.906299	1.02815e-14	18:76922918:76923851:-	30258933	1
NONRATT013670.2	17.5	35	0	0	#NAME?	0.0452371	1	Down	1.95824	0	18:7081235:7115816:-	30071499	2
NONRATT013676.2	33.5	0	67	Inf	Inf	0.00897791	0.491575	Up	3.50581e-11	1.83219	18:12283264:12284143:-	30075312	2
NONRATT013721.2	3710	7189	231	0.0321324	-4.95983	0.000539353	0.0843475	Down	72.8849	2.26425	18:26183752:26212799:-	30101655	4
NONRATT013761.2	36	70	2	0.0285714	-5.12928	0.0310688	0.907785	Down	1.42749	0.0462407	18:29497865:29501118:-	30134152	2
NONRATT013927.2	31	2	60	30	4.90689	0.045828	1	Up	0.0524172	1.40973	18:70346995:70347847:-	30245765	1
NONRATT013929.2	19.5	0	39	Inf	Inf	0.0365357	0.970376	Up	2.3975e-09	1.02342	18:71730837:71731591:-	30246519	1
NONRATT013943.2	699.5	127	1272	10.0157	3.3242	0.0105868	0.540193	Up	5.13084	49.5268	18:73248924:73249783:-	30248629	3
NONRATT014062.2	126.5	26	227	8.73077	3.12611	0.04374	1	Up	0.9046	7.69792	19:17969014:17969604:+	30321781	1
NONRATT014263.2	18.5	0	37	Inf	Inf	0.0405966	1	Up	9.60903e-45	3.49763	19:41968736:41983648:+	30448825	3
NONRATT014467.2	26965.5	1573	52358	33.2854	5.05682	0.00806546	0.470573	Up	33.0915	1064.77	19:11301985:11303133:-	30574556	2
NONRATT014530.2	570.5	1010	131	0.129703	-2.94672	0.0226359	0.796626	Down	50.735	6.37048	19:22621344:22632069:-	30617468	3
NONRATT014579.2	81.5	0	163	Inf	Inf	0.000370434	0.0684869	Up	1.02617e-07	12.7007	19:26074976:26075232:-	30649769	1
NONRATT014662.2	18.5	0	37	Inf	Inf	0.0405966	1	Up	2.81881e-15	1.60548	19:39249614:39252131:-	30707618	2
NONRATT014684.2	149.5	6	293	48.8333	5.60979	0.00120458	0.141722	Up	0.246308	10.8724	19:41666214:41666752:-	30720896	1
NONRATT014724.2	79.5	12	147	12.25	3.61471	0.0378348	0.989408	Up	0.497419	5.78638	19:43838178:43838766:-	30748914	2
NONRATT014728.2	47.5	0	95	Inf	Inf	0.00288896	0.249256	Up	1.74684e-14	5.18908	19:43989579:43991986:-	30750777	2
NONRATT014774.2	55.5	109	2	0.0183486	-5.76818	0.0087315	0.491575	Down	5.24042	0.10318	19:53612054:53625725:-	30773616	2
NONRATT014799.2	24	48	0	0	#NAME?	0.0227751	0.796626	Down	1.3967	0.00424935	19:55720364:55862204:-	30792370	7
NONRATT014828.2	34	68	0	0	#NAME?	0.00857786	0.486512	Down	1.92013	2.47389e-12	19:57604728:57613181:-	30806260	4
NONRATT014946.2	82.5	165	0	0	#NAME?	0.000352115	0.0668362	Down	6.636	1.13085e-09	2:27236102:27236615:+	30877877	1
NONRATT015055.2	17.5	0	35	Inf	Inf	0.0452371	1	Up	4.93253e-27	0.573184	2:54889587:54890822:+	30950947	1
NONRATT015129.2	29	58	0	0	#NAME?	0.0137146	0.640136	Down	2.45681	1.84276e-25	2:84658212:84658696:+	31002569	1
NONRATT015253.2	21	0	42	Inf	Inf	0.0312457	0.907785	Up	9.30063e-07	0.639682	2:127811021:127827112:+	31084011	9
NONRATT015280.2	24.5	48	1	0.0208333	-5.58496	0.0485886	1	Down	2.56136	0.0507244	2:141451227:141451615:+	31098824	1
NONRATT015370.2	2149.5	486	3813	7.84568	2.9719	0.0196578	0.750263	Up	14.7504	111.974	2:182012483:182013163:+	31166465	1
NONRATT015371.2	451.5	27	876	32.4444	5.0199	0.000545095	0.0843475	Up	0.77989	24.296	2:182028420:182032561:+	31167185	2
NONRATT015416.2	24	48	0	0	#NAME?	0.0227751	0.796626	Down	3.44201	1.03143e-28	2:187690133:187690421:+	31191165	1
NONRATT015560.2	34.5	67	2	0.0298507	-5.06609	0.0348212	0.956978	Down	3.63043	0.126529	2:196487661:196492688:+	31278719	2
NONRATT015679.2	23	46	0	0	#NAME?	0.0253082	0.841795	Down	1.58219	3.31486e-09	2:209163302:209181190:+	31363831	5
NONRATT015688.2	450.5	813	88	0.108241	-3.20768	0.015759	0.689479	Down	11.3073	1.1863	2:210045285:210068621:+	31371368	8
NONRATT015689.2	272.5	496	49	0.0987903	-3.33949	0.0172462	0.719993	Down	14.5397	1.38247	2:210045293:210053595:+	31372073	5
NONRATT015697.2	28.5	57	0	0	#NAME?	0.0143945	0.654697	Down	4.09276	3.81299e-28	2:211078317:211078606:+	31375882	1
NONRATT015698.2	28.5	0	57	Inf	Inf	0.0143945	0.654697	Up	7.45177e-23	2.14873	2:211078606:211105157:+	31376410	3
NONRATT015739.2	73	134	12	0.0895522	-3.48113	0.0481618	1	Down	4.9388	0.427363	2:221966646:221967208:+	31399290	1
NONRATT015794.2	198	0	396	Inf	Inf	6.76037e-06	0.00405919	Up	6.62393e-09	13.4852	2:240648107:240654800:+	31441615	3
NONRATT015825.2	560	1046	74	0.0707457	-3.82121	0.00453829	0.343655	Down	20.7507	1.42558	2:243709438:243710479:+	31462290	1
NONRATT015837.2	125	0	250	Inf	Inf	5.82626e-05	0.019289	Up	0.00199634	12.7059	2:250601084:250621284:+	31469407	3
NONRATT015855.2	43.5	86	1	0.0116279	-6.42626	0.0101352	0.522769	Down	0.767248	0.00631096	2:251763185:251766013:+	31481674	2
NONRATT015859.2	35.5	0	71	Inf	Inf	0.00749712	0.452242	Up	7.95712e-11	1.35696	2:251823735:251824784:+	31483782	1
NONRATT015892.2	40	0	80	Inf	Inf	0.00510944	0.365518	Up	1.39485e-14	3.18526	2:257633561:257634065:+	31508147	1
NONRATT015905.2	322	0	644	Inf	Inf	6.30295e-07	0.000598192	Up	0.000161388	5.39666	2:264825240:264833283:+	31525367	4
NONRATT016006.2	81	159	3	0.0188679	-5.72792	0.00390294	0.310404	Down	1.26772	0.0224941	2:28926093:28933592:-	31588426	4
NONRATT016047.2	49	3	95	31.6667	4.98489	0.0200847	0.76247	Up	0.0897943	2.91957	2:30783113:30783762:-	31617085	1
NONRATT016070.2	56.5	0	113	Inf	Inf	0.00156557	0.166324	Up	0	3.03399	2:34238823:34254818:-	31636076	5
NONRATT016073.2	24.5	0	49	Inf	Inf	0.0216105	0.780829	Up	6.95615e-32	4.72336	2:34569497:34569703:-	31637140	1
NONRATT016080.2	34	66	2	0.030303	-5.04439	0.0361891	0.970376	Down	5.1787	0.164242	2:37619765:37854758:-	31642625	2
NONRATT016182.2	25.5	0	51	Inf	Inf	0.0194723	0.747191	Up	0	4.35434	2:62150476:62150999:+	30983754	2
NONRATT016201.2	91.5	176	7	0.0397727	-4.65208	0.00951556	0.511183	Down	5.74651	0.223547	2:80273682:80293189:-	31718358	5
NONRATT016386.2	27	0	54	Inf	Inf	0.0167029	0.705585	Up	5.02638e-07	1.61535	2:143892697:143905048:+	31103074	9
NONRATT016429.2	65	5	125	25	4.64386	0.0168345	0.705907	Up	0.110543	2.68322	2:152785959:152788350:-	31863416	2
NONRATT016453.2	24.5	0	49	Inf	Inf	0.0216105	0.780829	Up	0.00219453	1.15609	2:157896731:157897585:-	31874164	1
NONRATT016501.2	547	37	1057	28.5676	4.83631	0.000646722	0.0907369	Up	0.868516	24.2719	2:182011444:182012314:-	31901977	1
NONRATT016502.2	21.5	0	43	Inf	Inf	0.02965	0.894318	Up	0	2.92773	2:182012855:182013150:-	31902272	1
NONRATT016587.2	108.5	21	196	9.33333	3.22239	0.0441299	1	Up	1.04968	9.30234	2:188399054:188399934:-	31951943	5
NONRATT016618.2	75.5	150	1	0.00666667	-7.22882	0.00151598	0.162267	Down	3.64652	0.033514	2:189889361:189892175:-	31971670	2
NONRATT016723.2	64	128	0	0	#NAME?	0.000977845	0.11898	Down	7.50801	4.15949e-21	2:204699083:204699434:-	32036588	1
NONRATT016803.2	20.5	0	41	Inf	Inf	0.0329189	0.933532	Up	2.41378e-17	1.43322	2:217168744:217169320:-	32089732	1
NONRATT016817.2	64	119	9	0.0756303	-3.72489	0.0431945	1	Down	4.36944	0.308234	2:222673724:222674286:-	32101726	1
NONRATT016830.2	643.5	1148	139	0.12108	-3.04597	0.0181937	0.73746	Down	10.7227	1.25816	2:215370195:215372406:-	32087782	1
NONRATT016834.2	38	0	76	Inf	Inf	0.00603459	0.399574	Up	6.39453e-13	1.84898	2:226689441:226691502:-	32114255	2
NONRATT016849.2	26	0	52	Inf	Inf	0.0184935	0.73746	Up	9.78338e-13	1.97863	2:227718790:227719470:-	32123525	2
NONRATT016869.2	56	0	112	Inf	Inf	0.00161761	0.169325	Up	4.962e-21	6.03808	2:232148092:232155852:-	32133065	5
NONRATT016938.2	22	0	44	Inf	Inf	0.028128	0.880728	Up	6.54947e-30	1.55003	2:252369137:252370285:-	32177999	3
NONRATT016969.2	368	91	645	7.08791	2.82536	0.0335047	0.940393	Up	1.5217	10.4449	2:260110310:260116502:-	32198974	8
NONRATT017478.2	19.5	39	0	0	#NAME?	0.0365357	0.970376	Down	2.85987	3.14212e-29	20:55253731:55265362:+	32496474	3
NONRATT017649.2	70.5	0	141	Inf	Inf	0.000668738	0.09154	Up	3.67836e-07	3.63067	20:10668735:10669511:-	32577515	1
NONRATT017654.2	54	0	108	Inf	Inf	0.0018462	0.1864	Up	1.25125e-05	3.89989	20:10966357:10967396:-	32580306	2
NONRATT017766.2	23	0	46	Inf	Inf	0.0253082	0.841795	Up	6.03258e-12	2.76451	20:33487635:33488954:-	32655459	2
NONRATT017864.2	76	152	0	0	#NAME?	0.000493873	0.082715	Down	8.06685	6.8044e-15	3:2299330:2299720:+	32703333	1
NONRATT017914.2	41	82	0	0	#NAME?	0.00471367	0.349472	Down	1.97384	8.90038e-13	3:4034914:4042090:+	32733748	7
NONRATT017918.2	21	42	0	0	#NAME?	0.0312457	0.907785	Down	2.55121	3.33193e-29	3:4042615:4043526:+	32737542	2
NONRATT017993.2	86.5	4	169	42.25	5.40088	0.0046658	0.349472	Up	0.225457	9.38257	3:8633304:8635344:+	32786087	4
NONRATT018001.2	18	0	36	Inf	Inf	0.0428337	1	Up	1.75858e-28	1.73491	3:8770346:8770762:+	32790686	1
NONRATT018055.2	203	45	361	8.02222	3.004	0.0360245	0.970376	Up	0.476445	3.65529	3:12009543:12011950:+	32823724	2
NONRATT018220.2	30	60	0	0	#NAME?	0.0124592	0.599219	Down	1.66424	2.06106e-14	3:55960321:55971381:+	32912894	7
NONRATT018400.2	147.5	272	23	0.0845588	-3.5639	0.0209471	0.77657	Down	1.2853	0.104829	3:92670321:92674698:+	33038665	1
NONRATT018427.2	71	0	142	Inf	Inf	0.000650124	0.0907369	Up	0	7.88044	3:96023066:96024389:+	33056358	2
NONRATT018517.2	51.5	0	103	Inf	Inf	0.0021851	0.207381	Up	8.27211e-15	4.36975	3:113383824:113384293:+	33120102	1
NONRATT018556.2	761	63	1459	23.1587	4.53348	0.00095302	0.116959	Up	1.03511	23.198	3:117938795:117940221:+	33140612	2
NONRATT018642.2	25.5	51	0	0	#NAME?	0.0194723	0.747191	Down	1.42754	3.26412e-08	3:126345136:126345878:+	33199387	1
NONRATT018677.2	24.5	49	0	0	#NAME?	0.0216105	0.780829	Down	0.812308	1.72159e-18	3:140062418:140083019:+	33221020	4
NONRATT019015.2	319	23	615	26.7391	4.74088	0.00134635	0.152116	Up	1.70254	44.0094	3:1260420:1260699:-	33442659	1
NONRATT019258.2	115	18	212	11.7778	3.558	0.0271972	0.873993	Up	0.762878	8.72702	3:23075469:23075954:-	33595174	1
NONRATT019299.2	64	4	124	31	4.9542	0.012884	0.617565	Up	0.0317973	0.93329	3:37950723:37953382:-	33627850	1
NONRATT019484.2	84.5	169	0	0	#NAME?	0.000318597	0.063881	Down	6.54741	4.03792e-10	3:82324818:82325645:-	33733393	2
NONRATT019501.2	30	2	58	29	4.85798	0.0496639	1	Up	0.080066	2.31314	3:88841736:88842237:-	33743627	1
NONRATT019515.2	39.5	76	3	0.0394737	-4.66297	0.0363959	0.970376	Down	6.09189	0.237794	3:93411395:93411997:-	33754411	2
NONRATT019591.2	356	690	22	0.0318841	-4.97102	0.000782812	0.103186	Down	9.68108	0.294501	3:110303514:110304986:-	33811049	1
NONRATT019609.2	145	33	257	7.78788	2.96123	0.0488989	1	Up	1.268	9.45603	3:112155495:112173768:-	33823343	7
NONRATT019786.2	2357.5	63	4652	73.8413	6.20636	2.88982e-05	0.0116891	Up	1.59783	113.428	3:145807914:145834134:-	33950800	6
NONRATT019792.2	103	11	195	17.7273	4.1479	0.0146146	0.657814	Up	0.186148	3.24747	3:146634946:146636147:-	33955302	1
NONRATT019804.2	18	0	36	Inf	Inf	0.0428337	1	Up	2.47765e-16	1.2406	3:147813469:147814053:-	33963577	1
NONRATT019853.2	137	274	0	0	#NAME?	3.84004e-05	0.0137888	Down	13.6027	3.64283e-16	3:151248289:151258581:-	33997401	4
NONRATT019865.2	35	1	69	69	6.10852	0.0193485	0.747191	Up	0.0205656	2.07593	3:152942334:152943777:+	33311415	2
NONRATT019887.2	460.5	0	921	Inf	Inf	1.1217e-07	0.000228122	Up	9.78439e-11	22.7797	3:154807033:154812902:+	33321586	4
NONRATT019898.2	18	0	36	Inf	Inf	0.0428337	1	Up	1.517e-30	1.16177	3:156582033:156617987:-	34022485	4
NONRATT020158.2	17.5	0	35	Inf	Inf	0.0452371	1	Up	0	2.71505	4:9881507:9882887:+	34182527	2
NONRATT020211.2	21	0	42	Inf	Inf	0.0312457	0.907785	Up	2.08505e-18	1.0513	4:27698368:27702622:+	34212341	3
NONRATT020230.2	21.5	0	43	Inf	Inf	0.02965	0.894318	Up	3.0385e-23	1.78102	4:32666235:32666720:+	34223769	1
NONRATT020232.2	21.5	0	43	Inf	Inf	0.02965	0.894318	Up	3.37458e-08	0.770699	4:33942099:33943217:+	34226510	1
NONRATT020364.2	17.5	0	35	Inf	Inf	0.0452371	1	Up	1.00326e-17	1.97673	4:65059762:65060119:+	34308391	1
NONRATT020555.2	18	0	36	Inf	Inf	0.0428337	1	Up	2.07211e-07	0.943	4:99937573:99989486:+	34444222	3
NONRATT020581.2	22	44	0	0	#NAME?	0.028128	0.880728	Down	1.49111	0.00011925	4:104669958:104670567:+	34457950	1
NONRATT020584.2	596.5	177	1016	5.74011	2.52108	0.046655	1	Up	1.60383	8.90489	4:106659285:106662514:+	34461208	2
NONRATT020650.2	83.5	11	156	14.1818	3.82597	0.0280891	0.880728	Up	0.522538	7.01442	4:117660426:117660870:+	34506331	1
NONRATT020750.2	18.5	0	37	Inf	Inf	0.0405966	1	Up	1.96361e-18	0.579595	4:130422086:130423373:+	34571128	1
NONRATT020773.2	22.5	45	0	0	#NAME?	0.0266813	0.869187	Down	2.13175	0	4:145017611:145049739:+	34584906	3
NONRATT020850.2	1418	102	2734	26.8039	4.74437	0.000535716	0.0843475	Up	8.00654	208.395	4:140895582:140901178:+	34578612	3
NONRATT020860.2	161	0	322	Inf	Inf	1.81264e-05	0.008064	Up	2.73635e-05	3.81635	4:152966561:152968248:+	34630566	1
NONRATT021040.2	53	0	106	Inf	Inf	0.00197401	0.193807	Up	4.20336e-05	0.566634	4:180132181:180135931:+	34759723	1
NONRATT021137.2	1024.5	246	1803	7.32927	2.87367	0.0226553	0.796626	Up	8.24582	58.5397	4:10198188:10198803:-	34822714	1
NONRATT021179.2	48	0	96	Inf	Inf	0.00278776	0.244979	Up	1.78029e-08	3.42087	4:25392054:25392618:-	34855678	2
NONRATT021240.2	24.5	0	49	Inf	Inf	0.0216105	0.780829	Up	3.14711e-25	1.3647	4:34740520:34779792:-	34901330	6
NONRATT021356.2	21.5	0	43	Inf	Inf	0.02965	0.894318	Up	3.77975e-14	3.05392	4:67188593:67190574:-	34976990	2
NONRATT021403.2	33.5	0	67	Inf	Inf	0.00897791	0.491575	Up	3.31543e-25	2.97198	4:78911150:78913905:-	35006141	3
NONRATT021420.2	20	40	0	0	#NAME?	0.0346785	0.956751	Down	1.02649	3.8885e-05	4:81235167:81236469:-	35017675	2
NONRATT021425.2	47.5	0	95	Inf	Inf	0.00288896	0.249256	Up	1.22717e-19	2.46088	4:81235205:81236534:-	35024216	2
NONRATT021493.2	241.5	426	57	0.133803	-2.90182	0.037462	0.987609	Down	15.4465	1.99164	4:100222884:100224722:-	35079900	5
NONRATT021731.2	61	118	4	0.0338983	-4.88264	0.0149801	0.666276	Down	7.2356	0.223877	4:147949124:147975608:-	35249030	2
NONRATT021751.2	44	3	85	28.3333	4.82443	0.027187	0.873993	Up	0.159434	4.07406	4:163822942:163946729:-	35356009	3
NONRATT021905.2	52.5	99	6	0.0606061	-4.04439	0.040516	1	Down	4.0946	0.246747	4:168210151:168210649:-	35368678	1
NONRATT022139.2	18	0	36	Inf	Inf	0.0428337	1	Up	0.000134998	0.762396	5:35865680:35880718:+	35520617	12
NONRATT022149.2	30	0	60	Inf	Inf	0.0124592	0.599219	Up	1.23166e-05	1.54995	5:37605982:37606759:+	35531550	1
NONRATT022179.2	527	54	1000	18.5185	4.2109	0.00223491	0.21039	Up	0.568792	10.1981	5:50120611:50122570:+	35554640	1
NONRATT022201.2	54	108	0	0	#NAME?	0.0018462	0.1864	Down	5.12801	7.09533e-11	5:58157796:58159069:+	35565491	2
NONRATT022234.2	2151	3750	552	0.1472	-2.76415	0.0286559	0.894318	Down	122.171	17.3739	5:60534026:60538375:+	35587012	4
NONRATT022480.2	46.5	0	93	Inf	Inf	0.0031048	0.263095	Up	5.8246e-18	7.00873	5:128693636:128693900:+	35751205	1
NONRATT022568.2	110.5	1	220	220	7.78136	0.000327931	0.063951	Up	0.0252167	6.5734	5:138188803:138189470:+	35807935	1
NONRATT022600.2	183.5	41	326	7.95122	2.99118	0.0394374	1	Up	0.98754	7.54539	5:140990829:140994729:+	35827958	6
NONRATT022630.2	25	0	50	Inf	Inf	0.0205104	0.764361	Up	4.94388e-23	2.1727	5:144953042:144953498:+	35848870	1
NONRATT022682.2	22	44	0	0	#NAME?	0.028128	0.880728	Down	1.62267	9.83522e-24	5:150001280:150014124:+	35889084	4
NONRATT022792.2	348.5	638	59	0.0924765	-3.43477	0.0123309	0.599219	Down	22.1312	1.96829	5:157759444:157760039:+	35947083	1
NONRATT022803.2	391	0	782	Inf	Inf	2.45208e-07	0.00030192	Up	2.97175e-06	10.6692	5:158114263:158115726:+	35956911	1
NONRATT022881.2	98.5	197	0	0	#NAME?	0.000166053	0.0375227	Down	1.61945	4.43976e-08	5:167661991:167664505:+	36000325	1
NONRATT022970.2	21.5	43	0	0	#NAME?	0.02965	0.894318	Down	2.93743	4.17592e-24	5:1260964:1261265:-	36058643	1
NONRATT022990.2	78.5	148	9	0.0608108	-4.03953	0.0238814	0.827191	Down	2.33013	0.133629	5:7627380:7660261:-	36068743	4
NONRATT022992.2	217	27	407	15.0741	3.914	0.00834003	0.480683	Up	1.26374	18.4491	5:8207845:8208286:-	36069716	1
NONRATT023004.2	27.5	55	0	0	#NAME?	0.0158857	0.689479	Down	1.25797	6.59534e-20	5:9423651:9429717:-	36078118	4
NONRATT023017.2	20	40	0	0	#NAME?	0.0346785	0.956751	Down	2.66376	1.05328e-27	5:13065143:13065457:-	36083896	1
NONRATT023026.2	23	0	46	Inf	Inf	0.0253082	0.841795	Up	1.88247e-22	1.06296	5:16383564:16392558:-	36088689	5
NONRATT023044.2	32.5	0	65	Inf	Inf	0.0098445	0.513356	Up	4.56111e-06	0.825682	5:22709153:22710718:-	36103022	1
NONRATT023125.2	19.5	0	39	Inf	Inf	0.0365357	0.970376	Up	1.21251e-07	0.940969	5:48501891:48547303:-	36158418	2
NONRATT023136.2	21	42	0	0	#NAME?	0.0312457	0.907785	Down	2.28508	8.64655e-08	5:50556927:50638147:-	36165635	2
NONRATT023249.2	38.5	77	0	0	#NAME?	0.00578507	0.390314	Down	3.39061	8.43192e-06	5:73986136:73986607:-	36238821	1
NONRATT023256.2	86	0	172	Inf	Inf	0.000295925	0.0601827	Up	1.67141e-23	7.32278	5:74251268:74251738:-	36243263	1
NONRATT023260.2	287	506	68	0.134387	-2.89553	0.0341094	0.952121	Down	22.8131	2.95938	5:74275640:74276098:-	36245397	1
NONRATT023284.2	18.5	37	0	0	#NAME?	0.0405966	1	Down	1.03288	1.82726e-32	5:76681887:76682624:-	36256049	1
NONRATT023285.2	19.5	0	39	Inf	Inf	0.0365357	0.970376	Up	0.000194497	2.10183	5:76717797:76756125:-	36256417	3
NONRATT023302.2	27.5	54	1	0.0185185	-5.75489	0.0367978	0.971899	Down	2.55153	0.0592273	5:78485519:78485954:-	36263391	1
NONRATT023325.2	108.5	0	217	Inf	Inf	0.000109221	0.028794	Up	1.83519e-17	12.9939	5:87552696:87585939:-	36279914	2
NONRATT023335.2	69	138	0	0	#NAME?	0.000728447	0.0978318	Down	7.71623	8.02865e-30	5:92868535:92871528:-	36288759	2
NONRATT023403.2	36	0	72	Inf	Inf	0.00717322	0.438274	Up	2.00364e-14	2.30214	5:116996690:117017381:-	36343021	4
NONRATT023440.2	29	0	58	Inf	Inf	0.0137146	0.640136	Up	1.22497e-16	1.69229	5:126275931:126282349:-	36370962	6
NONRATT023452.2	43	0	86	Inf	Inf	0.00403081	0.315289	Up	2.58507e-06	2.44234	5:127505642:127506349:-	36376868	1
NONRATT023562.2	18.5	37	0	0	#NAME?	0.0405966	1	Down	0.424517	7.71498e-11	5:139687611:139696431:-	36446517	4
NONRATT023646.2	75.5	0	151	Inf	Inf	0.000507337	0.0839819	Up	2.60065e-07	2.1977	5:147927139:147931757:-	36496891	3
NONRATT023671.2	144.5	13	276	21.2308	4.40808	0.00653123	0.418822	Up	0.754847	15.0245	5:150955955:151712587:-	36511611	8
NONRATT023801.2	26	52	0	0	#NAME?	0.0184935	0.73746	Down	0.437971	0.000144239	5:160230952:160233411:-	36603084	1
NONRATT023806.2	29.5	1	58	58	5.85798	0.0308287	0.907785	Up	0.0202133	0.831267	5:160407583:160409076:-	36607641	2
NONRATT023969.2	52.5	6	99	16.5	4.04439	0.040516	1	Up	0.172906	2.80082	6:1410551:1414214:+	36716092	4
NONRATT023980.2	95	176	14	0.0795455	-3.65208	0.0296514	0.894318	Down	5.38204	0.400873	6:2262819:2280619:+	36722744	8
NONRATT024102.2	28.5	0	57	Inf	Inf	0.0143945	0.654697	Up	8.12213e-09	0.565439	6:27792417:27815917:+	36801667	6
NONRATT024111.2	72	144	0	0	#NAME?	0.000614689	0.0892931	Down	7.19856	1.47844e-05	6:28175338:28177234:+	36808075	2
NONRATT024155.2	46.5	89	4	0.0449438	-4.47573	0.0328807	0.933532	Down	4.52025	0.178058	6:39609731:39610136:+	36835660	1
NONRATT024163.2	176.5	21	332	15.8095	3.98272	0.00939924	0.506873	Up	1.0698	16.3478	6:42852680:42855281:+	36838698	4
NONRATT024214.2	27	0	54	Inf	Inf	0.0167029	0.705585	Up	5.02566e-29	1.48542	6:43713444:43722124:+	36849122	4
NONRATT024242.2	77.5	13	142	10.9231	3.44931	0.0468099	1	Up	0.561196	5.90393	6:57396157:57396638:+	36890786	1
NONRATT024378.2	51	0	102	Inf	Inf	0.00226114	0.21039	Up	2.48732e-13	7.56217	6:94611172:94642692:+	36977263	2
NONRATT024451.2	158.5	302	15	0.0496689	-4.33151	0.00641831	0.415323	Down	16.2569	0.760451	6:104611042:104612771:+	37022083	4
NONRATT024455.2	116.5	0	233	Inf	Inf	7.98401e-05	0.0236793	Up	0.00115113	6.21222	6:104611082:104614941:+	37024501	7
NONRATT024498.2	38.5	0	77	Inf	Inf	0.00578507	0.390314	Up	1.14589e-05	0.610129	6:108087671:108090182:-	37510977	1
NONRATT024588.2	25	49	1	0.0204082	-5.61471	0.046353	1	Down	1.41838	0.0356536	6:127328965:127332246:+	37108974	3
NONRATT024590.2	25.5	0	51	Inf	Inf	0.0194723	0.747191	Up	2.62463e-31	4.13167	6:128059537:128061035:+	37109574	3
NONRATT024745.2	176.5	0	353	Inf	Inf	1.17279e-05	0.00538576	Up	0.00523168	5.15639	6:963901:988572:-	37226574	5
NONRATT024806.2	61	115	7	0.0608696	-4.03814	0.0334866	0.940393	Down	6.72151	0.383688	6:10890155:10899108:-	37266995	3
NONRATT024811.2	27	0	54	Inf	Inf	0.0167029	0.705585	Up	0.00325272	1.08117	6:11067701:11080366:-	37269908	3
NONRATT024826.2	24.5	0	49	Inf	Inf	0.0216105	0.780829	Up	1.68571e-07	2.00949	6:22128398:22135726:-	37281270	4
NONRATT024921.2	43	3	83	27.6667	4.79008	0.0289555	0.894318	Up	0.108808	2.67282	6:41039525:41040143:-	37334317	1
NONRATT025013.2	53	0	106	Inf	Inf	0.00197401	0.193807	Up	7.26062e-05	2.86433	6:75760972:75761798:-	37394593	2
NONRATT025071.2	1592.5	2705	480	0.177449	-2.49452	0.0444399	1	Down	186.822	32.0603	6:91680225:91680524:-	37426180	1
NONRATT025102.2	366.5	711	22	0.0309423	-5.01427	0.000698867	0.0947531	Down	17.4583	0.516402	6:95387812:95389260:-	37447080	2
NONRATT025149.2	34.5	67	2	0.0298507	-5.06609	0.0348212	0.956978	Down	3.80861	0.13532	6:102266119:102268284:-	37477172	2
NONRATT025222.2	23	0	46	Inf	Inf	0.0253082	0.841795	Up	4.64879e-75	2.35409	6:107467941:107468329:+	37042728	1
NONRATT025239.2	23	46	0	0	#NAME?	0.0253082	0.841795	Down	2.0768	2.0944e-13	6:110166093:110166555:-	37521167	1
NONRATT025311.2	11062	20528	1596	0.0777475	-3.68506	0.015545	0.683022	Down	230.668	17.339	6:127993913:127995751:-	37568705	1
NONRATT025313.2	24	0	48	Inf	Inf	0.0227751	0.796626	Up	1.56301e-40	0.636358	6:128081393:128082886:-	37570198	1
NONRATT025363.2	19	0	38	Inf	Inf	0.0385032	0.989408	Up	2.55623e-31	2.58782	6:135695577:135696572:+	37183754	2
NONRATT025432.2	234.5	42	427	10.1667	3.34577	0.019154	0.747191	Up	0.303155	2.953	6:147089279:147092168:-	37634277	1
NONRATT025498.2	19	0	38	Inf	Inf	0.0385032	0.989408	Up	4.37277e-23	1.44779	7:11046406:11047117:+	37672574	3
NONRATT025516.2	157.5	32	283	8.84375	3.14466	0.0356129	0.970376	Up	0.968348	8.37391	7:11232049:11232724:+	37685015	1
NONRATT025519.2	101	6	196	32.6667	5.02975	0.00519516	0.36613	Up	0.174397	5.93209	7:11242479:11243310:+	37687446	3
NONRATT025521.2	65.5	131	0	0	#NAME?	0.000893789	0.111126	Down	4.63322	3.42673e-05	7:11242643:11243312:+	37688032	2
NONRATT025580.2	49.5	0	99	Inf	Inf	0.00250835	0.23038	Up	4.06524e-31	7.7805	7:12457871:12458790:+	37720345	2
NONRATT025711.2	26.5	0	53	Inf	Inf	0.0175712	0.72296	Up	0	1.23911	7:29479206:29480053:+	37806817	1
NONRATT025764.2	68.5	127	10	0.0787402	-3.66676	0.0423805	1	Down	7.36662	0.588711	7:40645570:40645925:+	37833428	1
NONRATT025783.2	118	231	5	0.021645	-5.52982	0.00215217	0.207016	Down	7.10557	0.139333	7:50563070:50563794:+	37848917	2
NONRATT025792.2	433	55	811	14.7455	3.8822	0.0047624	0.349472	Up	0.88205	12.5268	7:54213331:54236613:+	37856157	14
NONRATT025884.2	90.5	173	8	0.0462428	-4.43463	0.0124446	0.599219	Down	8.7185	0.395415	7:70814414:70815270:+	37914249	4
NONRATT025888.2	19.5	39	0	0	#NAME?	0.0365357	0.970376	Down	2.58163	6.71074e-05	7:71789891:71790207:+	37915938	1
NONRATT025947.2	28.5	0	57	Inf	Inf	0.0143945	0.654697	Up	1.79538e-59	4.81246	7:83351294:83354353:+	37946330	3
NONRATT025973.2	17.5	0	35	Inf	Inf	0.0452371	1	Up	7.99939e-38	2.53595	7:98813069:98813493:+	37963277	2
NONRATT026058.2	20	0	40	Inf	Inf	0.0346785	0.956751	Up	8.96551e-17	1.33152	7:117435978:117436571:+	38018631	1
NONRATT026075.2	72	144	0	0	#NAME?	0.000614689	0.0892931	Down	4.4461	1.95827e-12	7:117764319:117765902:+	38027008	4
NONRATT026076.2	36.5	73	0	0	#NAME?	0.00686587	0.423128	Down	3.17164	1.09244e-12	7:117765346:117765905:+	38027485	2
NONRATT026153.2	467.5	803	132	0.164384	-2.60486	0.0436864	1	Down	13.2159	2.10686	7:123046964:123048679:+	38078438	2
NONRATT026198.2	771.5	1330	213	0.16015	-2.6425	0.0357521	0.970376	Down	14.7943	2.28682	7:126685425:126687282:+	38110524	1
NONRATT026200.2	18	0	36	Inf	Inf	0.0428337	1	Up	2.3269e-08	0.38133	7:126733158:126735018:+	38113111	1
NONRATT026214.2	101.5	0	203	Inf	Inf	0.000145894	0.0358095	Up	9.66238e-15	2.40097	7:129785405:129787092:+	38122038	1
NONRATT026216.2	368	7	729	104.143	6.70242	3.78382e-05	0.0137888	Up	0.112116	10.8825	7:129862033:129863445:+	38123375	2
NONRATT026221.2	27.5	1	54	54	5.75489	0.0367978	0.971899	Up	0.0255651	1.04013	7:130063381:130067566:+	38126871	7
NONRATT026223.2	25	1	49	49	5.61471	0.046353	1	Up	0.028982	1.13119	7:130077617:130081521:+	38128255	6
NONRATT026283.2	45.5	2	89	44.5	5.47573	0.0160454	0.694292	Up	0.0380454	1.44358	7:139255263:139259130:+	38164154	5
NONRATT026288.2	139	253	25	0.0988142	-3.33914	0.0302819	0.907785	Down	9.64323	0.920487	7:141973541:141974083:+	38254106	1
NONRATT026372.2	174.5	20	329	16.45	4.04002	0.00874052	0.491575	Up	0.46132	7.52369	7:2529908:2530782:-	38299495	1
NONRATT026407.2	204	408	0	0	#NAME?	5.85332e-06	0.00378763	Down	19.8188	2.84381e-17	7:3340847:3341953:-	38318871	2
NONRATT026492.2	74.5	9	140	15.5556	3.95936	0.0279407	0.880728	Up	0.308735	4.75087	7:11972667:11982179:-	38364177	6
NONRATT026523.2	35	70	0	0	#NAME?	0.00783853	0.461113	Down	2.1342	3.51662e-11	7:12516358:12517202:-	38390188	3
NONRATT026581.2	20	40	0	0	#NAME?	0.0346785	0.956751	Down	0.918172	5.90379e-15	7:15180014:15183548:-	38430705	6
NONRATT026612.2	24	0	48	Inf	Inf	0.0227751	0.796626	Up	1.47122e-05	1.48592	7:23940556:23941198:-	38452252	1
NONRATT026771.2	23	46	0	0	#NAME?	0.0253082	0.841795	Down	0.926442	1.29021e-26	7:60390514:60391533:-	38550332	1
NONRATT026818.2	21.5	43	0	0	#NAME?	0.02965	0.894318	Down	0.383578	0	7:70351819:70355576:-	38586783	6
NONRATT026836.2	104.5	0	209	Inf	Inf	0.000128609	0.0326942	Up	1.44331e-11	9.64256	7:70585017:70585572:-	38598867	2
NONRATT026872.2	30	2	58	29	4.85798	0.0496639	1	Up	0.0365911	1.32502	7:75413876:75419012:-	38618466	6
NONRATT026884.2	18	36	0	0	#NAME?	0.0428337	1	Down	2.29955	2.79099e-32	7:76793088:76794841:-	38630164	2
NONRATT026924.2	639	185	1093	5.90811	2.5627	0.0427392	1	Up	2.19501	12.5475	7:91511754:91513493:-	38649770	1
NONRATT026945.2	388	776	0	0	#NAME?	2.54498e-07	0.00030192	Down	30.6021	1.84121e-06	7:97738957:97743202:-	38662393	2
NONRATT027046.2	27	0	54	Inf	Inf	0.0167029	0.705585	Up	0.00364935	1.53882	7:117181980:117185484:-	38720824	5
NONRATT027084.2	21.5	0	43	Inf	Inf	0.02965	0.894318	Up	3.34245e-07	1.23497	7:119038503:119071705:-	38743682	3
NONRATT027218.2	74	136	12	0.0882353	-3.5025	0.0463721	1	Down	3.83087	0.333134	7:130068488:130069222:-	38829072	1
NONRATT027246.2	34	68	0	0	#NAME?	0.00857786	0.486512	Down	2.01269	1.85472e-18	7:130449049:130450243:-	38843508	4
NONRATT027251.2	48	96	0	0	#NAME?	0.00278776	0.244979	Down	8.51201	4.23458e-08	7:131047980:131048214:-	38845037	1
NONRATT027612.2	363	625	101	0.1616	-2.6295	0.0463512	1	Down	8.25267	1.28962	8:48430962:48432525:+	39110105	1
NONRATT027624.2	36.5	0	73	Inf	Inf	0.00686587	0.423128	Up	9.62e-18	2.77294	8:48663886:48664534:+	39115902	2
NONRATT027626.2	34.5	0	69	Inf	Inf	0.00819843	0.474443	Up	3.04282e-08	1.30243	8:48721866:48723021:+	39117360	2
NONRATT027642.2	20.5	0	41	Inf	Inf	0.0329189	0.933532	Up	1.79778e-18	0.441127	8:49374852:49376687:+	39127613	1
NONRATT027654.2	161	6	316	52.6667	5.71882	0.000897687	0.111126	Up	0.16079	8.2399	8:50568497:50571565:+	39135712	4
NONRATT027677.2	73	0	146	Inf	Inf	0.000581501	0.0880665	Up	1.46747e-24	6.00573	8:55179863:55182545:+	39146526	3
NONRATT027849.2	108	0	216	Inf	Inf	0.000111446	0.0288463	Up	3.76241e-07	1.95638	8:76864339:76875889:-	39841003	6
NONRATT027878.2	495	0	990	Inf	Inf	7.98824e-08	0.000218906	Up	0.00100469	42.7796	8:81963660:81968607:+	39292212	2
NONRATT027897.2	19	0	38	Inf	Inf	0.0385032	0.989408	Up	0.00325944	1.47641	8:85414072:85436453:+	39303675	2
NONRATT027919.2	17	34	0	0	#NAME?	0.0478397	1	Down	1.3752	1.18783e-29	8:90776726:90777239:+	39318693	1
NONRATT027933.2	23	0	46	Inf	Inf	0.0253082	0.841795	Up	2.77826e-21	1.07717	8:94693289:94742217:+	39325127	9
NONRATT028050.2	18.5	37	0	0	#NAME?	0.0405966	1	Down	1.46429	1.86594e-16	8:117589914:117590863:+	39396323	2
NONRATT028102.2	44.5	89	0	0	#NAME?	0.00359765	0.291001	Down	1.23476	5.48431e-07	8:119529894:119531389:+	39423773	1
NONRATT028149.2	1929	3458	400	0.115674	-3.11187	0.0148418	0.662343	Down	219.06	24.4797	8:128027551:128028307:+	39451234	3
NONRATT028275.2	26.5	0	53	Inf	Inf	0.0175712	0.72296	Up	1.88279e-31	5.18651	8:13871276:13871593:-	39533810	2
NONRATT028317.2	58.5	117	0	0	#NAME?	0.00137596	0.153426	Down	6.21092	5.18629e-13	8:22125468:22125932:-	39560029	2
NONRATT028520.2	409.5	76	743	9.77632	3.28929	0.0143665	0.654697	Up	3.07088	28.8725	8:52924220:52925477:-	39694895	2
NONRATT028553.2	23.5	47	0	0	#NAME?	0.0240069	0.827421	Down	0.589304	4.1907e-09	8:55308760:55310390:-	39712250	1
NONRATT028578.2	51	102	0	0	#NAME?	0.00226114	0.21039	Down	1.27767	8.19477e-08	8:58932576:58935355:-	39733733	2
NONRATT028723.2	424.5	0	849	Inf	Inf	1.65193e-07	0.000259082	Up	0.000711041	19.6334	8:79402634:79406745:+	39273464	3
NONRATT028740.2	27	54	0	0	#NAME?	0.0167029	0.705585	Down	1.21397	2.10357e-18	8:77016901:77020339:+	39260365	4
NONRATT028800.2	40	80	0	0	#NAME?	0.00510944	0.365518	Down	1.90213	1.12966e-10	8:85388352:85391416:-	39870718	2
NONRATT028806.2	117.5	12	223	18.5833	4.21594	0.0112451	0.558581	Up	0.157615	2.90787	8:87041620:87044183:-	39875817	2
NONRATT028819.2	74	8	140	17.5	4.12928	0.0234561	0.81546	Up	0.25254	4.25	8:90628202:90630621:-	39886716	3
NONRATT028833.2	186	341	31	0.0909091	-3.45943	0.0195592	0.748507	Down	4.81491	0.427572	8:93323802:93349109:-	39900917	7
NONRATT028863.2	315	79	551	6.97468	2.80213	0.0376133	0.989408	Up	2.71299	18.268	8:96584536:96585138:-	39922009	1
NONRATT028893.2	37	0	74	Inf	Inf	0.00657421	0.419688	Up	2.53184e-29	2.72138	8:104841901:104912539:-	39943625	2
NONRATT028895.2	17	34	0	0	#NAME?	0.0478397	1	Down	0.541628	1.4813e-20	8:104965496:104974122:-	39949413	5
NONRATT028908.2	31.5	63	0	0	#NAME?	0.0108081	0.545616	Down	0.896952	5.16594e-23	8:109482587:109484035:-	39957635	1
NONRATT028945.2	17	34	0	0	#NAME?	0.0478397	1	Down	0.72482	5.15808e-10	8:115145512:115149544:-	39977286	4
NONRATT029082.2	19	0	38	Inf	Inf	0.0385032	0.989408	Up	1.02352e-16	0.395956	8:128610233:128616350:-	40064256	5
NONRATT029116.2	71.5	143	0	0	#NAME?	0.000632115	0.0907369	Down	6.66169	0.000352005	8:132896956:132911196:-	40084035	4
NONRATT029165.2	123	26	220	8.46154	3.08092	0.0474834	1	Up	0.839856	6.97185	9:15313504:15314134:+	40113027	1
NONRATT029172.2	187.5	344	31	0.0901163	-3.47207	0.0190531	0.747191	Down	15.8422	1.39805	9:16002922:16011557:+	40115644	2
NONRATT029217.2	94	188	0	0	#NAME?	0.000202944	0.0444479	Down	2.90746	1.29458e-12	9:17350275:17354890:+	40143058	3
NONRATT029284.2	29.5	59	0	0	#NAME?	0.0130704	0.622307	Down	4.11815	1.19827e-18	9:32088978:32089377:+	40188226	2
NONRATT029305.2	24.5	49	0	0	#NAME?	0.0216105	0.780829	Down	1.76801	4.57607e-26	9:40922306:40922881:+	40199369	1
NONRATT029378.2	19.5	39	0	0	#NAME?	0.0365357	0.970376	Down	2.04013	4.60446e-23	9:54670724:54672486:+	40239376	2
NONRATT029392.2	42	84	0	0	#NAME?	0.00435563	0.333369	Down	2.54457	0.000660028	9:61739631:61742965:+	40246844	3
NONRATT029450.2	25	0	50	Inf	Inf	0.0205104	0.764361	Up	1.85797e-32	0.904047	9:68933065:68934163:+	40289611	1
NONRATT029469.2	43	0	86	Inf	Inf	0.00403081	0.315289	Up	2.07075e-18	1.358	9:71304467:71313454:-	40691714	5
NONRATT029487.2	80	0	160	Inf	Inf	0.00040007	0.0720937	Up	3.12523e-27	9.37165	9:80002930:80003613:+	40327403	2
NONRATT029562.2	61.5	114	9	0.0789474	-3.66297	0.0481718	1	Down	5.00601	0.373333	9:85547416:85547886:+	40365445	1
NONRATT029686.2	274	54	494	9.14815	3.19348	0.0217819	0.78503	Up	2.61776	23.0993	9:100624877:100645746:+	40439739	5
NONRATT029932.2	963	283	1643	5.80565	2.53746	0.0416024	1	Up	6.31729	35.4236	9:43550678:43551604:-	40586042	1
NONRATT030027.2	769	0	1538	Inf	Inf	1.13658e-08	5.39343e-05	Up	5.66381e-06	51.4517	9:61681284:61683268:-	40646154	3
NONRATT030056.2	17.5	0	35	Inf	Inf	0.0452371	1	Up	0	0.989548	9:65545205:65547806:-	40665631	2
NONRATT030160.2	40	0	80	Inf	Inf	0.00510944	0.365518	Up	1.42142e-09	0.667016	9:81717625:81720006:-	40744352	1
NONRATT030208.2	57	0	114	Inf	Inf	0.00151546	0.162267	Up	9.71795e-19	1.61862	9:85386754:85388161:-	40772292	1
NONRATT030212.2	136	272	0	0	#NAME?	3.9712e-05	0.0137888	Down	7.60757	0.000513201	9:86046205:86048955:-	40774341	2
NONRATT030233.2	22.5	45	0	0	#NAME?	0.0266813	0.869187	Down	1.31675	0	9:91775864:91776569:-	40785409	1
NONRATT030237.2	38.5	76	1	0.0131579	-6.24793	0.0146479	0.657814	Down	2.0139	0.0299218	9:92380507:92435393:-	40787601	3
NONRATT030247.2	416	0	832	Inf	Inf	1.81991e-07	0.000259082	Up	0	20.2474	9:93371671:93374520:-	40796378	6
NONRATT030281.2	22	0	44	Inf	Inf	0.028128	0.880728	Up	3.20635e-21	2.38879	9:98514603:98515204:-	40815264	2
NONRATT030290.2	85	160	10	0.0625	-4	0.0224829	0.796626	Down	3.15239	0.181793	9:98550220:98551426:-	40821011	3
NONRATT030291.2	22.5	45	0	0	#NAME?	0.0266813	0.869187	Down	1.1652	1.05131e-16	9:98550638:98551429:-	40821802	1
NONRATT030354.2	924	207	1641	7.92754	2.98687	0.0186317	0.740897	Up	5.42348	41.5935	9:113300831:113301619:-	40871052	1
NONRATT030406.2	66	0	132	Inf	Inf	0.000867668	0.109311	Up	1.28446e-05	5.45707	X:1314696:1316683:+	40904136	2
NONRATT030518.2	110	0	220	Inf	Inf	0.000102853	0.028158	Up	2.60697e-13	2.88548	X:37221786:37223310:+	40984950	1
NONRATT030749.2	26.5	0	53	Inf	Inf	0.0175712	0.72296	Up	0.000223374	1.54475	X:122683244:122690462:+	41107417	3
NONRATT030811.2	67.5	131	4	0.0305344	-5.03342	0.0108595	0.546273	Down	7.50418	0.194673	X:142298321:142672228:+	41139070	2
NONRATT031008.2	63.5	126	1	0.00793651	-6.97728	0.0028885	0.249256	Down	4.7815	0.0319613	X:56398802:56399346:-	41271287	1
NONRATT031119.2	19.5	0	39	Inf	Inf	0.0365357	0.970376	Up	0.000673519	1.97608	X:84766915:84821762:-	41346587	4
NONRATT031122.2	31	0	62	Inf	Inf	0.0113296	0.558581	Up	3.0718e-06	0.669067	X:88312690:88314544:-	41349317	1
NONRATT031151.2	26.5	0	53	Inf	Inf	0.0175712	0.72296	Up	7.1059e-10	1.04111	X:106791399:106794677:+	41074651	3
NONRATT031382.1	46	0	92	Inf	Inf	0.00321994	0.266506	Up	0.000344484	1.74894	1:88264314:88267181:+	41514494	3
NONRATT031410.1	72	1	143	143	7.15987	0.00181609	0.185999	Up	0.0589889	7.76177	1:141675043:141679522:+	41534254	2
NONRATT031567.1	169	20	318	15.9	3.99095	0.0097597	0.513356	Up	0.167352	2.51234	1:198162428:198168448:-	41694791	2
NONRATT031710.1	61.5	116	7	0.0603448	-4.05063	0.0327191	0.933532	Down	0.64476	0.0376413	10:67107926:67128049:-	41811234	2
NONRATT031711.1	19	38	0	0	#NAME?	0.0385032	0.989408	Down	1.49609	0	10:70222689:70223220:-	41811765	1
NONRATT031796.1	27.5	55	0	0	#NAME?	0.0158857	0.689479	Down	0.234074	1.78647e-07	12:3233960:3284155:+	41887570	3
NONRATT031959.1	40.5	0	81	Inf	Inf	0.00490654	0.358202	Up	0.00554428	4.13043	14:24182754:24188263:+	42026969	2
NONRATT032653.1	20.5	0	41	Inf	Inf	0.0329189	0.933532	Up	4.98374e-28	0.651683	2:254022078:254039326:+	42569458	5
NONRATT032802.1	31.5	63	0	0	#NAME?	0.0108081	0.545616	Down	3.428	4.72439e-18	20:45681158:45684630:+	42679864	3
NONRATT033548.1	19	0	38	Inf	Inf	0.0385032	0.989408	Up	3.19769e-21	1.63181	7:83989467:83991369:-	43241932	2
NONRATT033783.1	118.5	2	235	117.5	6.87652	0.000524464	0.0843475	Up	0.149969	13.6816	9:27210508:27213172:-	43442932	2
TCONS_00000036	19.5	0	39	Inf	Inf	0.0365357	0.970376	Up	0.0176211	1.88967	1:11962868:12009248:+	412	2	XLOC_000022	ENSRNOT00000074325	o
TCONS_00000040	427.5	93	762	8.19355	3.03449	0.0218951	0.785361	Up	4.76996	37.7681	1:11962889:12009248:+	403	2	XLOC_000022	ENSRNOT00000074325	o
TCONS_00000188	138.5	9	268	29.7778	4.89616	0.00356363	0.289896	Up	0.325663	9.64303	1:47952158:47967635:+	555	2	XLOC_000092	ENSRNOT00000025936	o
TCONS_00000309	29	0	58	Inf	Inf	0.0137146	0.640136	Up	7.65845e-10	2.01238	1:72717405:72784058:+	580	2	XLOC_000155	ENSRNOT00000024400	o
TCONS_00000865	10093.5	998	19189	19.2275	4.2651	0.00568179	0.388875	Up	100.53	1869.35	1:174684257:174725564:+	205	2	XLOC_000468	ENSRNOT00000014002	o
TCONS_00001348	27994	3679	52309	14.2183	3.82967	0.0356377	0.970376	Up	353.455	4858.75	1:243167156:243283679:+	215	3	XLOC_000732	ENSRNOT00000021496	o
TCONS_00001349	42767	4649	80885	17.3984	4.12088	0.0439545	1	Up	459.431	7728.8	1:243193462:243283679:+	209	2	XLOC_000732	ENSRNOT00000021496	o
TCONS_00001421	32.5	0	65	Inf	Inf	0.0098445	0.513356	Up	4.66198e-05	1.13828	1:252880956:252900728:+	1148	2	XLOC_000755	ENSRNOT00000054757	o
TCONS_00002161	77.5	146	9	0.0616438	-4.0199	0.0248263	0.841795	Down	2.9829	0.18018	1:90200795:90279664:-	1011	2	XLOC_001123	ENSRNOT00000030186	o
TCONS_00002163	122	0	244	Inf	Inf	6.49862e-05	0.021026	Up	3.38964e-10	5.37008	1:90200872:90251548:-	909	2	XLOC_001123	ENSRNOT00000030186	o
TCONS_00002437	111.5	215	8	0.0372093	-4.74819	0.00615943	0.405952	Down	6.34289	0.22449	1:147613110:147614257:-	700	2	XLOC_001259		u
TCONS_00002438	66.5	127	6	0.0472441	-4.40372	0.0205828	0.765056	Down	9.24546	0.44331	1:147646122:147656439:-	283	2	XLOC_001259		u
TCONS_00003131	5061	9744	378	0.0387931	-4.68806	0.00123296	0.143872	Down	180.001	6.74634	1:226065527:226114272:-	1118	2	XLOC_001574	ENSRNOT00000027693	x
TCONS_00003242	181.5	35	328	9.37143	3.22827	0.0281491	0.880728	Up	3.37968	30.7971	1:243240134:243283687:-	213	2	XLOC_001627	ENSRNOT00000021496	x
TCONS_00003245	536	119	953	8.0084	3.00151	0.0210165	0.77712	Up	11.471	88.5318	1:243279938:243283683:-	215	2	XLOC_001627	ENSRNOT00000021496	i
TCONS_00004550	42.5	85	0	0	#NAME?	0.00418932	0.325897	Down	1.38746	0.0033717	10:7091233:7092594:-	1271	2	XLOC_002301		u
TCONS_00004552	93	185	1	0.00540541	-7.53138	0.000665941	0.09154	Down	3.13453	0.00865798	10:7091240:7092594:-	1219	3	XLOC_002301		u
TCONS_00004581	624.5	92	1157	12.5761	3.65261	0.00593052	0.39824	Up	8.4971	103.64	10:12877195:12882225:-	223	2	XLOC_002319		u
TCONS_00004684	119	0	238	Inf	Inf	7.26412e-05	0.0224809	Up	5.66501e-25	22.1107	10:16453262:16541200:-	215	2	XLOC_002372		u
TCONS_00004724	299.5	599	0	0	#NAME?	8.98493e-07	0.000778151	Down	28.1809	9.18897e-05	10:29301060:29393173:-	439	2	XLOC_002391	ENSRNOT00000005304	o
TCONS_00006154	856.5	25	1688	67.52	6.07724	3.83408e-05	0.0137888	Up	0.231903	15.1792	11:61458195:61511259:-	2221	3	XLOC_003144	ENSRNOT00000046208	o
TCONS_00006169	269.5	25	514	20.56	4.36177	0.00315573	0.264264	Up	2.39799	47.9923	11:64167597:64259788:-	214	3	XLOC_003148		u
TCONS_00006331	133.5	262	5	0.019084	-5.71149	0.00134087	0.152116	Down	3.14491	0.060384	11:80112639:80122617:-	1722	6	XLOC_003202		u
TCONS_00006488	78	5	151	30.2	4.91648	0.00936755	0.506873	Up	0.120429	3.31728	12:6978236:6984189:+	908	2	XLOC_003270		u
TCONS_00006542	1649	265	3033	11.4453	3.51668	0.00665309	0.421578	Up	25.9017	287.107	12:10291883:10327008:+	211	3	XLOC_003282	ENSRNOT00000092627	x
TCONS_00006547	2906.5	747	5066	6.78179	2.76167	0.0309485	0.907785	Up	75.2914	493.511	12:10323921:10368635:+	205	2	XLOC_003282	ENSRNOT00000071567	x
TCONS_00007058	24.5	0	49	Inf	Inf	0.0216105	0.780829	Up	1.83547e-12	2.46317	12:13192683:13273244:-	399	2	XLOC_003539	ENSRNOT00000044378	o
TCONS_00007520	38	2	74	37	5.20945	0.0267912	0.870775	Up	0.0863024	2.60845	13:56421344:56431339:+	568	3	XLOC_003776	ENSRNOT00000032122	x
TCONS_00007836	36.5	3	70	23.3333	4.54432	0.044767	1	Up	0.252081	6.2592	13:113735245:113748416:+	224	2	XLOC_003921		u
TCONS_00007900	560.5	116	1005	8.66379	3.115	0.0168593	0.705907	Up	10.9751	91.6518	13:42897938:42966884:-	219	2	XLOC_003952		u
TCONS_00007901	214.5	45	384	8.53333	3.09311	0.0303033	0.907785	Up	4.46878	36.6925	13:42926761:42966884:-	209	2	XLOC_003952		u
TCONS_00007903	410.5	79	742	9.39241	3.23149	0.0158765	0.689479	Up	7.79036	70.8776	13:42943673:42966884:-	209	2	XLOC_003952		u
TCONS_00008544	47.5	93	2	0.0215054	-5.53916	0.0141316	0.654697	Down	4.25896	0.0951834	14:46630371:46658598:+	450	3	XLOC_004270	ENSRNOT00000085875	o
TCONS_00008661	39.5	0	79	Inf	Inf	0.00532307	0.369655	Up	0	3.41045	14:81088429:81091258:+	462	3	XLOC_004317	ENSRNOT00000014692	x
TCONS_00008662	47	1	93	93	6.53916	0.00797323	0.467107	Up	0.0402679	2.85978	14:81088429:81091258:+	648	4	XLOC_004317	ENSRNOT00000014692	x
TCONS_00008697	197.5	366	29	0.079235	-3.65772	0.0136862	0.640136	Down	12.5268	0.957402	14:84213389:84292393:+	604	2	XLOC_004338	ENSRNOT00000005996	o
TCONS_00009726	33.5	0	67	Inf	Inf	0.00897791	0.491575	Up	0.00717049	2.41952	15:18850194:18851875:-	555	2	XLOC_004859	ENSRNOT00000088264	i
TCONS_00010486	133	1	265	265	8.04985	0.000148462	0.0358221	Up	0.0105191	2.21357	16:83954301:83957286:+	2389	2	XLOC_005234		u
TCONS_00010561	2476.5	378	4575	12.1032	3.59731	0.00626534	0.407276	Up	34.2602	400.76	16:8288688:8338116:-	228	2	XLOC_005275	ENSRNOT00000026932	o
TCONS_00010593	177.5	42	313	7.45238	2.8977	0.0461586	1	Up	3.0635	21.8234	16:18956383:18988989:-	286	2	XLOC_005294	ENSRNOT00000064060	o
TCONS_00011680	501.5	127	876	6.89764	2.7861	0.03138	0.909828	Up	7.6269	50.8492	17:44638819:44673832:-	344	2	XLOC_005802	ENSRNOT00000091041	o
TCONS_00011690	222.5	9	436	48.4444	5.59826	0.000565627	0.0865835	Up	0.678054	33.3878	17:45530414:45596110:-	261	2	XLOC_005809		u
TCONS_00012209	45.5	5	86	17.2	4.10434	0.0461719	1	Up	0.120447	2.04362	18:60731955:60737765:+	844	3	XLOC_006037		u
TCONS_00012299	1134	0	2268	Inf	Inf	2.57638e-09	1.83387e-05	Up	3.24174e-10	197.794	18:84589303:84625351:+	229	2	XLOC_006080		u
TCONS_00012552	53	100	6	0.06	-4.05889	0.039496	1	Down	3.0049	0.18138	18:55276881:55389803:-	689	4	XLOC_006209		u
TCONS_00012596	98	0	196	Inf	Inf	0.00016973	0.0377543	Up	5.15589e-05	2.94886	18:60619920:60626958:-	1327	4	XLOC_006231	ENSRNOT00000023890	i
TCONS_00013251	565.5	108	1023	9.47222	3.2437	0.0132969	0.628887	Up	9.92938	90.8288	19:29173837:29214116:-	225	3	XLOC_006555		u
TCONS_00013774	144.5	3	286	95.3333	6.57491	0.000412328	0.0733738	Up	0.0187129	1.52355	2:112717824:112729447:+	3746	4	XLOC_006837		u
TCONS_00013775	35	0	70	Inf	Inf	0.00783853	0.461113	Up	0	1.72178	2:112717825:112720848:+	814	4	XLOC_006837		u
TCONS_00013846	202	8	396	49.5	5.62936	0.000647311	0.0907369	Up	0.727692	36.1089	2:140414854:140416059:+	219	2	XLOC_006873		u
TCONS_00013847	42	2	82	41	5.35755	0.0202178	0.764361	Up	0.155511	6.81259	2:140449378:140465201:+	239	2	XLOC_006874	ENSRNOT00000016475	x
TCONS_00013995	109	8	210	26.25	4.71425	0.00666304	0.421578	Up	0.672037	16.0671	2:188421175:188428920:+	261	2	XLOC_006954		u
TCONS_00014061	111.5	220	3	0.0136364	-6.1964	0.00117569	0.139476	Down	7.95019	0.106158	2:194993483:194994154:+	572	2	XLOC_006986		u
TCONS_00014063	53	106	0	0	#NAME?	0.00197401	0.193807	Down	1.67131	0	2:195005166:195007038:+	1311	2	XLOC_006987		u
TCONS_00014086	113	226	0	0	#NAME?	9.13782e-05	0.0260172	Down	3.25648	3.79557e-46	2:196574679:196585713:+	1435	5	XLOC_007002	ENSRNOT00000081672	x
TCONS_00014281	436	1	871	871	9.76653	5.87539e-07	0.000597444	Up	0.00761708	6.0413	2:220519611:220529935:+	2878	3	XLOC_007089	ENSRNOT00000089082	x
TCONS_00014341	75	150	0	0	#NAME?	0.000521235	0.0843475	Down	2.48856	1.06409e-07	2:241060601:241092582:+	1244	2	XLOC_007124	ENSRNOT00000033413	o
TCONS_00015015	2724	163	5285	32.4233	5.01896	0.000377285	0.0688593	Up	15.8193	495.531	2:196378546:196386238:-	213	2	XLOC_007475		u
TCONS_00015208	258.5	462	55	0.119048	-3.07039	0.0275844	0.880728	Down	20.5663	2.36072	2:210749471:210750199:-	464	2	XLOC_007544	ENSRNOT00000051261	o
TCONS_00015284	61.5	117	6	0.0512821	-4.2854	0.0259816	0.862178	Down	5.94709	0.292013	2:225812751:225827121:-	405	3	XLOC_007584		u
TCONS_00015518	480.5	0	961	Inf	Inf	9.18119e-08	0.000218906	Up	7.92784e-31	95.478	20:3624345:3769329:+	201	3	XLOC_007674	ENSRNOT00000086065	o
TCONS_00015519	182	0	364	Inf	Inf	1.01305e-05	0.00506021	Up	2.96344e-27	24.2223	20:3665677:3677847:+	300	3	XLOC_007674	ENSRNOT00000047663	o
TCONS_00016564	221	404	38	0.0940594	-3.41028	0.0181603	0.73746	Down	1.98482	0.182804	3:35904319:36057243:+	4202	3	XLOC_008169		u
TCONS_00018475	392.5	87	698	8.02299	3.00414	0.0240624	0.827421	Up	8.31423	64.873	4:23548442:23637196:+	215	3	XLOC_009113		u
TCONS_00018476	528	134	922	6.8806	2.78253	0.030997	0.907785	Up	12.9574	86.0403	4:23548442:23637196:+	214	3	XLOC_009113		u
TCONS_00018479	584	93	1075	11.5591	3.53096	0.00769655	0.461113	Up	9.33476	104.706	4:23548442:23677252:+	205	3	XLOC_009113		u
TCONS_00018512	49	98	0	0	#NAME?	0.00259767	0.237054	Down	1.01512	1.0027e-08	4:30535097:30544832:+	1994	4	XLOC_009132		u
TCONS_00018515	33.5	67	0	0	#NAME?	0.00897791	0.491575	Down	0.650757	1.09317e-17	4:30535109:30544832:+	2142	5	XLOC_009132		u
TCONS_00018516	31.5	63	0	0	#NAME?	0.0108081	0.545616	Down	0.547732	2.35532e-10	4:30535110:30544832:+	2358	5	XLOC_009132		u
TCONS_00018995	24.5	0	49	Inf	Inf	0.0216105	0.780829	Up	0	4.05775	4:150153639:150185597:+	242	2	XLOC_009381	ENSRNOT00000019778	x
TCONS_00019829	63	9	117	13	3.70044	0.045109	1	Up	0.36685	4.85167	4:140081254:140134491:-	481	3	XLOC_009748	ENSRNOT00000008892	x
TCONS_00020073	107	4	210	52.5	5.71425	0.00214461	0.207016	Up	0.182428	8.82356	4:174643869:174646348:-	476	2	XLOC_009855	ENSRNOT00000042291	i
TCONS_00020104	184	334	34	0.101796	-3.29624	0.0251787	0.841795	Down	2.7544	0.271731	4:179888877:179893930:-	2506	2	XLOC_009867	ENSRNOT00000085386	i
TCONS_00021170	34.5	69	0	0	#NAME?	0.00819843	0.474443	Down	2.39229	5.35801e-06	5:50119899:50139403:-	595	2	XLOC_010395	ENSRNOT00000081150	o
TCONS_00021535	89.5	0	179	Inf	Inf	0.000250069	0.0523527	Up	0	4.72316	5:126120598:126131727:-	755	3	XLOC_010533		u
TCONS_00021919	84.5	158	11	0.0696203	-3.84435	0.0271029	0.873993	Down	1.68779	0.109031	5:162805116:162808447:-	1939	2	XLOC_010713		u
TCONS_00022195	1219.5	181	2258	12.4751	3.64098	0.00514126	0.365906	Up	2.86942	34.6916	6:30627988:30630730:+	1300	2	XLOC_010843		u
TCONS_00022568	41	82	0	0	#NAME?	0.00471367	0.349472	Down	2.66556	0	6:123486347:123490716:+	634	2	XLOC_011034	ENSRNOT00000006604	i
TCONS_00022828	178	10	346	34.6	5.1127	0.00172715	0.178225	Up	0.997155	32.132	6:24640748:24642161:-	215	2	XLOC_011156	ENSRNOT00000047853	i
TCONS_00022829	119	5	233	46.6	5.54226	0.00208476	0.203278	Up	0.498673	21.7243	6:24640748:24642161:-	214	2	XLOC_011156	ENSRNOT00000047853	i
TCONS_00022830	132.5	10	255	25.5	4.67243	0.00516627	0.365906	Up	0.997756	23.9911	6:24640748:24642161:-	212	2	XLOC_011156	ENSRNOT00000047853	i
TCONS_00022884	587	155	1019	6.57419	2.71681	0.0335572	0.940393	Up	1.86378	11.8293	6:33120471:33150560:-	1720	3	XLOC_011190		u
TCONS_00022887	32.5	0	65	Inf	Inf	0.0098445	0.513356	Up	1.72294e-31	5.66742	6:33628854:33747904:-	228	3	XLOC_011192	ENSRNOT00000039492	o
TCONS_00023087	367.5	697	38	0.0545194	-4.19709	0.00306167	0.260993	Down	30.8187	1.62473	6:95384146:95465919:-	467	2	XLOC_011289	ENSRNOT00000074990	o
TCONS_00023101	110	8	212	26.5	4.72792	0.00645593	0.415867	Up	0.0664319	1.68059	6:96439050:96491709:-	2518	2	XLOC_011293	ENSRNOT00000010923	o
TCONS_00023284	294	0	588	Inf	Inf	9.83895e-07	0.000778151	Up	0	47.9582	6:128062668:128080900:-	245	2	XLOC_011392	ENSRNOT00000084685	x
TCONS_00025524	25	0	50	Inf	Inf	0.0205104	0.764361	Up	0.00753751	1.33435	8:71689972:71693007:+	754	2	XLOC_012485		u
TCONS_00025858	29.5	0	59	Inf	Inf	0.0130704	0.622307	Up	0	4.6285	8:122561912:122596894:+	254	2	XLOC_012652	ENSRNOT00000047198	x
TCONS_00026071	228	433	23	0.0531178	-4.23466	0.004722	0.349472	Down	1.38925	0.0727268	8:33928952:33987272:-	6440	4	XLOC_012754		u
TCONS_00027887	57	0	114	Inf	Inf	0.00151546	0.162267	Up	2.65076e-12	1.64359	X:14570702:14612577:+	1381	3	XLOC_013684	ENSRNOT00000038994	o

## Sheet: 24h vs 0h
id	baseMean	baseMean_control_0h	baseMean_case_24h	foldChange	log2FoldChange	pval	padj	up_down	expression_0h	expression_24h	locus	length	exon_count	gene_id	nearest_ref	class_code
NONRATT000054.2	27.8426	0	55.6851	Inf	Inf	0.0180003	0.682755	Up	3.62604e-26	2.35519	1:15819455:15826248:+	21509713	4
NONRATT000055.2	22.4566	44.9132	0	0	#NAME?	0.0250336	0.778536	Down	1.5047	0.0162895	1:15819783:15826280:+	21510278	4
NONRATT000056.2	49.4776	2.19089	96.7643	44.1667	5.46489	0.0158494	0.642525	Up	0.0496364	2.99739	1:15820516:15826630:+	21511020	3
NONRATT000168.2	146.242	292.484	0	0	#NAME?	3.25289e-05	0.00936259	Down	8.85222	4.46068e-08	1:46983328:46983952:+	21584455	1
NONRATT000501.2	233.33	466.66	0	0	#NAME?	3.27391e-06	0.0020121	Down	17.3943	9.9148e-09	1:83946289:83947804:+	21762157	2
NONRATT000542.2	31.7679	63.5358	0	0	#NAME?	0.00992493	0.497229	Down	4.5294	5.52061e-07	1:85437822:85447281:+	21782366	3
NONRATT000577.2	20.996	0	41.9921	Inf	Inf	0.0355026	0.912126	Up	1.33254e-28	3.95995	1:88457440:88459903:+	21801293	2
NONRATT000687.2	101.876	203.753	0	0	#NAME?	0.000159791	0.0303895	Down	9.17491	0.00018684	1:100994853:100997199:+	21860079	3
NONRATT000710.2	114.93	223.471	6.3901	0.0285948	-5.1281	0.00436785	0.299947	Down	2.03566	0.0716081	1:101688780:101690849:+	21875084	1
NONRATT000841.2	27.8426	0	55.6851	Inf	Inf	0.0180003	0.682755	Up	6.54578e-32	2.78714	1:141899438:141899901:+	21961788	1
NONRATT000891.2	39.9837	79.9675	0	0	#NAME?	0.00489086	0.322928	Down	2.52787	2.72265e-07	X:156319780:156321939:+	41151899	2
NONRATT000906.2	291.936	19.718	564.154	28.6111	4.8385	0.00148319	0.144334	Up	0.415283	14.8544	X:156719591:156720467:+	41161468	1
NONRATT000919.2	27.8426	54.7723	0.912871	0.0166667	-5.90689	0.0332051	0.889409	Down	1.68299	0.0511985	X:157125774:157126391:+	41168509	1
NONRATT000939.2	147.155	265.098	29.2119	0.110193	-3.1819	0.0400788	0.962875	Down	7.04188	0.943903	1:154424709:154457124:+	21996508	9
NONRATT000990.2	23.2782	0	46.5564	Inf	Inf	0.0282017	0.83036	Up	1.14044e-09	1.22212	1:164502468:164591881:+	22035009	13
NONRATT001015.2	122.781	240.998	4.56435	0.0189394	-5.72247	0.00191851	0.176011	Down	5.46317	0.1319	1:165624994:165649247:+	22054643	4
NONRATT001030.2	17.801	0	35.602	Inf	Inf	0.049269	1	Up	2.4065e-23	2.16861	1:166506896:166508721:+	22061210	3
NONRATT001137.2	22.3653	0	44.7307	Inf	Inf	0.0309265	0.865799	Up	1.82742e-22	0.465898	1:188436786:188444995:+	22132435	6
NONRATT001275.2	29.2119	0	58.4237	Inf	Inf	0.0158486	0.642525	Up	0	2.23751	1:201956970:201960559:+	22214644	2
NONRATT001310.2	26.0168	0	52.0336	Inf	Inf	0.0214626	0.739551	Up	6.55297e-33	1.76473	1:209768928:209785793:+	22235922	3
NONRATT001448.2	97.6772	0	195.354	Inf	Inf	0.000275365	0.043349	Up	0.000421914	2.885	1:220950797:220952357:+	22313501	1
NONRATT001459.2	63.901	0	127.802	Inf	Inf	0.00137491	0.137295	Up	2.37851e-15	3.27479	1:221243689:221244588:+	22319725	1
NONRATT001466.2	105.345	9.85901	200.832	20.3704	4.3484	0.0133466	0.589673	Up	0.267717	6.67872	1:221454187:221454882:+	22324065	1
NONRATT001502.2	757.957	129.263	1386.65	10.7274	3.42323	0.00764393	0.426636	Up	3.25672	42.7025	1:224921803:224924000:+	22346615	7
NONRATT001526.2	24.0998	48.1996	0	0	#NAME?	0.0210636	0.739551	Down	1.08699	2.78794e-19	1:225210579:225211421:+	22361874	1
NONRATT001649.2	385.597	721.898	49.295	0.0682853	-3.87228	0.00552198	0.344924	Down	7.67392	0.637193	1:247108081:247138155:+	22441302	8
NONRATT001714.2	124.789	232.234	17.3445	0.0746855	-3.74303	0.0223691	0.747198	Down	17.2058	1.59233	1:258002996:258004034:+	22490289	2
NONRATT001717.2	481.266	7.66812	954.863	124.524	6.96028	1.52153e-05	0.00507602	Up	0.157138	24.7616	1:258234313:258252793:+	22492211	4
NONRATT001805.2	41.0792	82.1584	0	0	#NAME?	0.00448442	0.305783	Down	1.18444	3.08187e-10	1:266119048:266122364:+	22555317	2
NONRATT001822.2	70.1085	140.217	0	0	#NAME?	0.00070619	0.0822712	Down	11.1704	0.0202248	1:266476428:266477166:+	22565433	2
NONRATT001824.2	18.0748	36.1497	0	0	#NAME?	0.0398166	0.959718	Down	2.90991	1.7676e-24	1:266483363:266484337:+	22566602	2
NONRATT001827.2	56.4154	112.831	0	0	#NAME?	0.00156235	0.14892	Down	5.60803	0	1:266506239:266506619:+	22568872	1
NONRATT001842.2	34.2327	0	68.4653	Inf	Inf	0.0101784	0.506472	Up	6.80191e-12	1.83187	1:267412624:267413932:+	22583016	2
NONRATT001914.2	57.0544	0	114.109	Inf	Inf	0.00204068	0.180966	Up	6.60237e-08	4.2519	1:282188112:282198083:+	22628509	5
NONRATT001933.2	162.035	0	324.069	Inf	Inf	3.09149e-05	0.00919574	Up	2.86579e-16	6.97254	1:2782900:2783972:-	22639318	1
NONRATT001976.2	23.5521	47.1041	0	0	#NAME?	0.0223082	0.747198	Down	1.46818	2.91139e-22	1:13384155:13384758:-	22664590	1
NONRATT002071.2	31.5853	1.09545	62.0752	56.6667	5.82443	0.030503	0.865799	Up	0.00698332	0.939662	1:37802591:37819294:-	22734490	4
NONRATT002087.2	26.9297	0	53.8594	Inf	Inf	0.0196398	0.717145	Up	6.87549e-29	3.5233	1:37988340:38009451:-	22744677	4
NONRATT002104.2	41.1705	1.09545	81.2455	74.1667	6.2127	0.0148365	0.62047	Up	0.0210569	1.51887	1:42461291:42462528:-	22753147	1
NONRATT002105.2	27.3861	0	54.7723	Inf	Inf	0.0187982	0.693313	Up	5.16706e-24	2.31198	1:42475791:42476937:-	22753691	2
NONRATT002328.2	35.1455	0	70.2911	Inf	Inf	0.00942216	0.480783	Up	5.90657e-12	5.1481	1:78520559:78520872:-	22891353	1
NONRATT002347.2	19.1703	0	38.3406	Inf	Inf	0.0426918	0.977648	Up	9.19949e-42	1.30327	1:79964759:79965437:-	22901548	1
NONRATT002457.2	24.6475	0	49.295	Inf	Inf	0.0245779	0.775868	Up	1.76747e-07	1.77622	1:85405752:85408391:-	22960425	6
NONRATT002459.2	76.316	12.0499	140.582	11.6667	3.54432	0.0480358	1	Up	0.14251	2.01412	1:85406468:85408082:-	22962039	1
NONRATT002687.2	17954.3	432.701	35476	81.9873	6.35733	0.00017468	0.0316558	Up	20.6608	2072.15	1:102786004:102788504:-	23084912	3
NONRATT002761.2	71.0214	3.28634	138.756	42.2222	5.39993	0.00850411	0.453934	Up	0.101611	5.73018	1:134873405:134885529:-	23132742	4
NONRATT002896.2	21.9089	43.8178	0	0	#NAME?	0.0265199	0.799079	Down	0.549946	2.96484e-15	X:157073859:157081220:-	41465138	4
NONRATT003012.2	109.545	0	219.089	Inf	Inf	0.000172941	0.0316558	Up	1.42878e-10	2.7924	1:167686150:167687958:-	23267198	1
NONRATT003019.2	136.383	256.334	16.4317	0.0641026	-3.96347	0.0151465	0.6252	Down	11.1286	0.874261	1:168971268:168971702:-	23270396	1
NONRATT003070.2	205.67	36.1497	375.19	10.3788	3.37557	0.0231315	0.76416	Up	1.06249	13.4455	1:180491928:181215438:-	23295891	7
NONRATT003071.2	318.592	71.2039	565.98	7.94872	2.99072	0.0294853	0.851114	Up	3.56721	34.7435	1:180644622:180644998:-	23296267	1
NONRATT003155.2	29.6683	0	59.3366	Inf	Inf	0.0152051	0.6252	Up	8.21697e-13	2.16074	1:197784145:197800777:-	23362468	3
NONRATT003167.2	20.996	0	41.9921	Inf	Inf	0.0355026	0.912126	Up	1.04511e-08	1.48287	1:197978421:197980787:-	23372167	6
NONRATT003169.2	25.104	0	50.2079	Inf	Inf	0.0234857	0.76416	Up	3.50454e-18	1.44125	1:197991860:197997293:-	23373698	8
NONRATT003172.2	30.1247	0	60.2495	Inf	Inf	0.0145917	0.611976	Up	9.31338e-09	2.40459	1:198116275:198117585:-	23375028	5
NONRATT003193.2	155.644	0	311.289	Inf	Inf	3.72356e-05	0.0103129	Up	3.40186e-28	16.011	1:198461405:198462033:-	23392161	3
NONRATT003232.2	33.7762	0	67.5524	Inf	Inf	0.0105834	0.517844	Up	0.000583372	2.441	1:199379374:199380335:-	23418813	3
NONRATT003289.2	1195.95	33.9588	2357.95	69.4355	6.1176	1.81161e-05	0.005781	Up	0.225608	19.3434	1:207993894:208000105:-	23453079	3
NONRATT003292.2	758.687	33.9588	1483.42	43.6828	5.44899	0.000118823	0.0245661	Up	0.545446	28.928	1:208000146:208001329:-	23455822	1
NONRATT003294.2	290.293	0	580.586	Inf	Inf	1.72016e-06	0.00139627	Up	3.00346e-24	24.0239	1:208004491:208005049:-	23456725	1
NONRATT003302.2	33.7762	0	67.5524	Inf	Inf	0.0105834	0.517844	Up	6.46814e-28	5.35897	1:209810348:209810638:-	23461247	1
NONRATT003337.2	147.429	0	294.857	Inf	Inf	4.76956e-05	0.0122418	Up	1.50792e-15	17.8317	1:213750211:213750835:-	23483361	2
NONRATT003379.2	395.456	51.4859	739.425	14.3617	3.84415	0.00574801	0.356013	Up	0.688907	12.2061	1:216776029:216777427:-	23507330	1
NONRATT003452.2	29.0293	58.0586	0	0	#NAME?	0.012817	0.577118	Down	2.12761	4.02056e-23	1:220862473:220863476:-	23540528	3
NONRATT003484.2	43.2701	86.5402	0	0	#NAME?	0.00379217	0.275571	Down	1.63714	3.45634e-17	1:221346080:221348944:-	23559104	4
NONRATT003536.2	21.4525	0	42.9049	Inf	Inf	0.0339113	0.891533	Up	9.13787e-10	2.35401	1:222744903:222745429:-	23586288	2
NONRATT003557.2	85.8099	10.9545	160.665	14.6667	3.87447	0.0296118	0.851114	Up	0.193106	3.63974	1:225923449:225924467:-	23597065	1
NONRATT003569.2	111.462	203.753	19.1703	0.094086	-3.40988	0.0381458	0.945849	Down	3.86166	0.445621	1:226601488:226605762:-	23603410	4
NONRATT003593.2	23.5521	47.1041	0	0	#NAME?	0.0223082	0.747198	Down	1.47862	7.44648e-13	1:227929441:227932593:-	23615914	3
NONRATT003720.2	27.9339	1.09545	54.7723	50	5.64386	0.041222	0.971827	Up	0.00874354	0.615481	1:252816535:252818575:-	23698456	1
NONRATT003723.2	30.1247	0	60.2495	Inf	Inf	0.0145917	0.611976	Up	2.36284e-07	0.868134	1:253119110:253122079:-	23701227	2
NONRATT003807.2	68.2827	129.263	7.30297	0.0564972	-4.14568	0.028128	0.83036	Down	3.2241	0.214265	1:263778533:263779291:-	23751018	1
NONRATT003809.2	20.8135	41.6269	0	0	#NAME?	0.0297446	0.851114	Down	1.2008	0.0137836	1:263789839:263796387:-	23751663	4
NONRATT003882.2	27.8426	54.7723	0.912871	0.0166667	-5.90689	0.0332051	0.889409	Down	1.11786	0.028095	1:266663867:266675150:-	23799379	10
NONRATT003986.2	105.984	203.753	8.21584	0.0403226	-4.63227	0.00900571	0.47041	Down	4.60366	0.219424	10:5211083:5211916:+	23877970	1
NONRATT004019.2	16.4317	32.8634	0	0	#NAME?	0.0481315	1	Down	1.15994	4.84806e-15	10:11152331:11153914:+	23899471	4
NONRATT004028.2	30.1247	0	60.2495	Inf	Inf	0.0145917	0.611976	Up	8.84607e-15	1.73957	10:11720238:11721037:+	23904465	1
NONRATT004035.2	34.963	69.013	0.912871	0.0132275	-6.24031	0.0182179	0.687458	Down	1.4916	0.0271324	10:730264:750635:+	23854693	4
NONRATT004036.2	297.961	53.6768	542.245	10.102	3.33657	0.0177491	0.682621	Up	0.725271	8.90768	10:730270:751058:+	23856098	5
NONRATT004038.2	19.1703	0	38.3406	Inf	Inf	0.0426918	0.977648	Up	8.59818e-24	1.43445	10:733885:750412:+	23857558	3
NONRATT004054.2	40.1663	0	80.3326	Inf	Inf	0.00629075	0.375374	Up	0.0123401	4.55166	10:12994635:12995679:+	23910975	2
NONRATT004090.2	4393.19	0	8786.38	Inf	Inf	3.08568e-11	4.52947e-07	Up	2.30143e-08	572.622	10:14088653:14090018:+	23929709	5
NONRATT004096.2	266.558	0	533.117	Inf	Inf	2.67662e-06	0.00196451	Up	1.23985e-08	24.5349	10:14257631:14258132:+	23932623	1
NONRATT004199.2	20.0832	0	40.1663	Inf	Inf	0.038914	0.95374	Up	2.30674e-27	1.76487	10:34201335:34201855:+	24000089	1
NONRATT004233.2	80.5152	13.1453	147.885	11.25	3.49185	0.0481859	1	Up	0.379555	5.20716	10:36716855:36725597:+	24021398	6
NONRATT004240.2	25.5604	0	51.1208	Inf	Inf	0.022448	0.747198	Up	3.19769e-42	2.5511	10:37243866:37244331:+	24026626	1
NONRATT004246.2	651.699	130.358	1173.04	8.9986	3.1697	0.0135377	0.589673	Up	9.41528	103.307	10:37594594:37605642:+	24028053	3
NONRATT004279.2	205.852	0	411.705	Inf	Inf	9.83525e-06	0.00396908	Up	1.95705e-09	10.051	10:39868992:39869938:+	24049038	1
NONRATT004309.2	20.0832	0	40.1663	Inf	Inf	0.038914	0.95374	Up	9.06984e-10	1.23202	10:43487477:43489060:+	24067022	3
NONRATT004310.2	52.0336	0	104.067	Inf	Inf	0.00277373	0.22128	Up	1.34794e-20	5.10553	10:43496099:43496665:+	24067494	2
NONRATT004312.2	236.707	8.76356	464.651	53.0208	5.72849	0.000529487	0.0659974	Up	0.686898	46.6057	10:43511327:43511557:+	24068324	1
NONRATT004323.2	22.3653	0	44.7307	Inf	Inf	0.0309265	0.865799	Up	3.81157e-10	1.73346	10:43768708:43769771:+	24074839	2
NONRATT004383.2	304.808	59.154	550.461	9.30556	3.21809	0.0211185	0.739551	Up	0.957028	11.0034	10:49307129:49310400:+	24118026	2
NONRATT004729.2	105.437	0	210.873	Inf	Inf	0.000202357	0.0345395	Up	0.000109145	2.55813	10:74080603:74088041:-	25061629	5
NONRATT004779.2	111.37	0	222.741	Inf	Inf	0.000161481	0.0303895	Up	2.21787e-08	19.1728	10:83203048:83204504:+	24405383	3
NONRATT004831.2	54.4071	1.09545	107.719	98.3333	6.61961	0.00649896	0.381087	Up	0.00488	0.921044	10:85782432:85785130:+	24442657	1
NONRATT004835.2	131.453	0	262.907	Inf	Inf	7.95282e-05	0.0179599	Up	1.24268e-10	22.6603	10:86168083:86168351:+	24444683	1
NONRATT004923.2	6318.34	1751.62	10885.1	6.2143	2.63559	0.0381192	0.945849	Up	76.079	578.681	10:89558307:89558741:+	24493472	1
NONRATT004982.2	94.117	1.09545	187.139	170.833	7.41645	0.000976667	0.105415	Up	0.00763191	2.1844	10:94252069:94254046:+	24531121	1
NONRATT005085.2	25.104	0	50.2079	Inf	Inf	0.0234857	0.76416	Up	0	1.59449	10:103620215:103622789:-	25318097	2
NONRATT005148.2	287.007	497.332	76.6812	0.154185	-2.69727	0.0495511	1	Down	6.06583	1.13695	10:109673510:109675057:+	24632612	1
NONRATT005180.2	130.267	24.0998	236.434	9.81061	3.29434	0.0390481	0.954954	Up	0.424987	5.14111	10:4904201:4905262:-	24653024	1
NONRATT005222.2	30.5812	0	61.1624	Inf	Inf	0.014006	0.599399	Up	0.000353756	3.53483	10:11990579:11994459:-	24682936	5
NONRATT005261.2	195.537	7.66812	383.406	50	5.64386	0.000884419	0.0991022	Up	0.71033	42.984	10:14087497:14087938:-	24707493	2
NONRATT005286.2	24.6475	0	49.295	Inf	Inf	0.0245779	0.775868	Up	1.40254e-21	1.44252	10:15160035:15160823:-	24725022	1
NONRATT005309.2	240.724	18.6226	462.826	24.8529	4.63534	0.00275541	0.22128	Up	0.629363	19.7092	10:15417622:15431869:-	24740818	2
NONRATT005328.2	423.116	49.295	796.936	16.1667	4.01495	0.00394073	0.281587	Up	1.11303	22.029	10:16769853:16774901:-	24752314	2
NONRATT005335.2	458.352	116.117	800.588	6.89465	2.78548	0.032894	0.887594	Up	1.75611	14.8067	10:17044161:17045408:-	24757554	1
NONRATT005357.2	1250.09	20.8135	2479.36	119.123	6.89631	3.24641e-06	0.0020121	Up	0.316391	46.7303	10:25860699:25861923:-	24768005	1
NONRATT005363.2	155.371	2.19089	308.55	140.833	7.13785	0.000278155	0.043349	Up	0.0462928	9.96011	10:29020028:29025486:-	24770596	6
NONRATT005386.2	272.309	485.282	59.3366	0.122272	-3.03183	0.030651	0.865799	Down	8.11116	1.22004	10:35705367:35716213:-	24790690	7
NONRATT005389.2	119.312	226.757	11.8673	0.0523349	-4.25608	0.0121835	0.560633	Down	14.6731	0.967855	10:35737593:35737885:-	24791365	1
NONRATT005390.2	48.1083	95.3037	0.912871	0.00957854	-6.70598	0.00708618	0.404739	Down	3.30177	0.0388125	10:35737594:35739606:-	24791909	4
NONRATT005531.2	103.154	0	206.309	Inf	Inf	0.000221197	0.0368971	Up	8.26901e-12	10.9574	10:50366946:50367381:-	24884665	1
NONRATT005557.2	35.602	71.2039	0	0	#NAME?	0.00704823	0.404144	Down	1.71499	0.000371599	10:55430432:55482483:-	24898035	5
NONRATT005609.2	23.4608	46.0087	0.912871	0.0198413	-5.65535	0.049844	1	Down	1.62875	0.042486	10:56619319:56620027:-	24930683	3
NONRATT005772.2	19.1703	0	38.3406	Inf	Inf	0.0426918	0.977648	Up	2.65626e-16	1.60553	10:67753080:67753637:-	25026477	1
NONRATT005784.2	32.8634	0	65.7267	Inf	Inf	0.0114513	0.540492	Up	1.03668e-12	0.817039	10:70157529:70159381:-	25035976	1
NONRATT005856.2	33.5024	2.19089	64.8138	29.5833	4.88671	0.044685	1	Up	0.0898229	3.25648	10:74413979:74431121:+	24342097	4
NONRATT005889.2	83.0713	0	166.143	Inf	Inf	0.000519412	0.065728	Up	7.34775e-10	7.57534	10:81999768:82026736:-	25101783	6
NONRATT005949.2	443.199	0	886.398	Inf	Inf	1.7962e-07	0.000527328	Up	0.0106296	29.9511	10:85096508:85099341:-	25136346	3
NONRATT005984.2	22.3653	0	44.7307	Inf	Inf	0.0309265	0.865799	Up	2.54253e-27	0.991234	10:86901949:86904923:-	25160460	5
NONRATT005985.2	310.376	0	620.752	Inf	Inf	1.21155e-06	0.00118562	Up	9.49511e-18	36.2844	10:86929393:86932117:-	25160855	4
NONRATT006021.2	31.2202	62.4404	0	0	#NAME?	0.0104384	0.515908	Down	3.02283	3.10535e-12	10:88433865:88434704:-	25181287	2
NONRATT006056.2	31.9505	0	63.901	Inf	Inf	0.0124029	0.567174	Up	2.65834e-18	1.4312	10:89394823:89395857:-	25200344	1
NONRATT006088.2	21.9089	0	43.8178	Inf	Inf	0.0323865	0.882007	Up	1.12987e-11	1.85464	10:90351899:90352448:-	25218123	1
NONRATT006091.2	53.1291	100.781	5.47723	0.0543478	-4.20163	0.0365481	0.929792	Down	2.70975	0.174919	10:90354345:90356244:-	25219951	5
NONRATT006212.2	294.583	51.4859	537.681	10.4433	3.3845	0.0165783	0.655936	Up	0.538396	6.95266	10:97733700:97735485:-	25296103	1
NONRATT006258.2	35.602	71.2039	0	0	#NAME?	0.00704823	0.404144	Down	2.19762	1.30917e-06	10:104512808:104513681:+	24591568	2
NONRATT006379.2	32.1331	62.4404	1.82574	0.0292398	-5.09592	0.0389189	0.95374	Down	2.53716	0.0991789	10:110429614:110431797:-	25406019	3
NONRATT006452.2	38.8883	77.7766	0	0	#NAME?	0.00534409	0.339593	Down	1.25081	1.86292e-06	11:31830726:31837242:+	25462738	7
NONRATT006490.2	331.555	632.072	31.0376	0.0491046	-4.348	0.00280322	0.222424	Down	4.77065	0.289492	11:35586020:35588517:+	25490564	1
NONRATT006569.2	25.104	0	50.2079	Inf	Inf	0.0234857	0.76416	Up	1.94305e-20	0.674656	11:54404815:54441619:+	25542489	15
NONRATT006625.2	191.703	0	383.406	Inf	Inf	1.39191e-05	0.00486472	Up	5.18467e-21	26.6976	11:69289054:69289385:+	25579634	1
NONRATT006658.2	60.1582	4.38178	115.935	26.4583	4.72565	0.0203743	0.725907	Up	0.0409195	1.47996	11:73722134:73723938:+	25601813	1
NONRATT006699.2	4851.91	1188.56	8515.26	7.16436	2.84084	0.0236864	0.76416	Up	18.1541	159.208	11:81515844:81517078:+	25620303	1
NONRATT006708.2	414.9	71.2039	758.596	10.6538	3.4133	0.0118578	0.555291	Up	0.875229	11.3667	11:82386579:82392208:+	25626815	7
NONRATT006745.2	178.101	318.775	37.4277	0.117411	-3.09036	0.0388886	0.95374	Down	10.9269	1.58172	11:87074160:87075574:+	25645523	3
NONRATT006811.2	259.255	0	518.511	Inf	Inf	3.08732e-06	0.0020121	Up	8.25102e-08	4.4253	11:14658224:14660926:-	25690636	1
NONRATT006873.2	23.0043	46.0087	0	0	#NAME?	0.0236306	0.76416	Down	3.19803	7.7686e-26	11:31788282:31788553:-	25728041	1
NONRATT006955.2	204.027	0	408.053	Inf	Inf	1.02749e-05	0.00396908	Up	0	13.1313	11:49707733:49708735:-	25776847	2
NONRATT007057.2	27.3861	54.7723	0	0	#NAME?	0.0150454	0.623876	Down	2.99528	8.3655e-16	11:70570446:70570791:-	25848595	1
NONRATT007058.2	99.1378	1.09545	197.18	180	7.49185	0.00080287	0.0920728	Up	0.00949383	2.91477	11:70693375:70703646:-	25850156	5
NONRATT007128.2	41.9921	0	83.9841	Inf	Inf	0.00548113	0.344924	Up	8.82106e-17	7.61813	11:81432992:81444208:-	25905974	4
NONRATT007129.2	11378.2	20739	2017.44	0.097278	-3.36174	0.0156984	0.641884	Down	260.499	31.0118	11:81621434:81639914:-	25907475	8
NONRATT007205.2	74.8554	0	149.711	Inf	Inf	0.000771266	0.089145	Up	6.56084e-09	3.1703	12:789512:792039:+	25956871	2
NONRATT007215.2	135.835	271.67	0	0	#NAME?	4.56697e-05	0.0119712	Down	16.0008	0.00289158	12:2170726:2172383:+	25961148	4
NONRATT007268.2	20.5396	0	41.0792	Inf	Inf	0.0371675	0.935817	Up	1.72251e-35	0.920407	12:11194960:11195989:+	25997251	1
NONRATT007271.2	67.5524	0	135.105	Inf	Inf	0.00112598	0.116396	Up	7.3941e-07	3.99337	12:12288835:12306349:+	25998270	7
NONRATT007412.2	76.6812	153.362	0	0	#NAME?	0.000500585	0.0638964	Down	2.25852	1.80044e-07	12:25346586:25370945:+	26093006	11
NONRATT007458.2	25.104	49.295	0.912871	0.0185185	-5.75489	0.0426857	0.977648	Down	1.83921	0.0399557	12:36642113:36642735:+	26115054	2
NONRATT007530.2	648.412	8.76356	1288.06	146.979	7.19947	5.00582e-06	0.0026243	Up	0.279535	47.7053	12:39599116:39599823:+	26155270	2
NONRATT007539.2	38.7057	75.5857	1.82574	0.0241546	-5.37156	0.0238436	0.765864	Down	2.0971	0.0743405	12:39821011:39823150:+	26161133	3
NONRATT007640.2	51.5772	0	103.154	Inf	Inf	0.00285473	0.224089	Up	0.00391783	2.25667	12:49552070:49557535:+	26219186	5
NONRATT007748.2	191.703	0	383.406	Inf	Inf	1.39191e-05	0.00486472	Up	8.27621e-21	18.6271	12:11252299:11252981:-	26293606	3
NONRATT007757.2	131.819	4.38178	259.255	59.1667	5.88671	0.00151149	0.145968	Up	0.0466141	3.18177	12:12409870:12411750:-	26300214	1
NONRATT007949.2	25.1952	50.3905	0	0	#NAME?	0.018795	0.693313	Down	1.77889	0.00046866	12:37904376:37905419:-	26420810	3
NONRATT007974.2	85.8099	0	171.62	Inf	Inf	0.000458249	0.0600592	Up	3.16421e-13	5.29557	12:38793941:38804657:-	26436929	3
NONRATT008016.2	163.221	326.443	0	0	#NAME?	1.93846e-05	0.00605419	Down	8.73586	1.03444e-31	12:41623687:41624501:-	26459079	2
NONRATT008066.2	58.9715	110.64	7.30297	0.0660066	-3.92125	0.0419403	0.977648	Down	4.30437	0.337493	12:47435389:47438940:-	26485408	4
NONRATT008097.2	183.487	0	366.974	Inf	Inf	1.71884e-05	0.00560687	Up	1.5352e-08	33.6139	12:51335029:51341712:-	26506296	3
NONRATT008130.2	36.0584	0	72.1168	Inf	Inf	0.00873182	0.459407	Up	3.33716e-38	4.76098	13:20446494:20446843:+	26526017	1
NONRATT008178.2	178.192	40.5315	315.853	7.79279	2.96214	0.0469895	1	Up	0.792809	7.47648	13:44971187:44986974:+	26558458	8
NONRATT008180.2	210.873	421.746	0	0	#NAME?	5.49003e-06	0.00268627	Down	10.7419	3.65157e-05	13:44974929:44986951:+	26559858	5
NONRATT008217.2	120.682	24.0998	217.263	9.01515	3.17235	0.0486155	1	Up	0.507567	5.57124	13:50252657:50258949:+	26582744	4
NONRATT008218.2	27.8426	0	55.6851	Inf	Inf	0.0180003	0.682755	Up	1.6231e-09	3.10241	13:50252709:50258947:+	26583161	5
NONRATT008236.2	127.528	2.19089	252.865	115.417	6.85071	0.000627764	0.0761566	Up	0.0807738	10.2271	13:51795920:51801377:+	26594762	4
NONRATT008267.2	55.4113	2.19089	108.632	49.5833	5.63178	0.0114198	0.540492	Up	0.0451235	3.29716	13:53419891:53420649:+	26616212	1
NONRATT008340.2	161.578	0	323.156	Inf	Inf	3.13228e-05	0.00919574	Up	1.20404e-09	5.34574	13:73733943:73735339:+	26664329	1
NONRATT008373.2	48.8386	0	97.6772	Inf	Inf	0.00340548	0.256354	Up	4.18328e-09	3.17677	13:78853131:78854210:+	26689776	3
NONRATT008391.2	1188.74	232.234	2145.25	9.23742	3.20749	0.00983473	0.496096	Up	5.36753	60.6598	13:79204474:79205290:+	26703534	1
NONRATT008444.2	33.8675	1.09545	66.6396	60.8333	5.92679	0.0254517	0.78675	Up	0.0454416	2.27826	13:89495248:89495924:+	26739573	1
NONRATT008451.2	156.74	13.1453	300.335	22.8472	4.51395	0.0061875	0.372239	Up	0.550036	15.7553	13:89742337:89742777:+	26741642	1
NONRATT008541.2	221.919	411.887	31.9505	0.0775709	-3.68834	0.0131744	0.589593	Down	14.2766	1.3537	13:103370220:103371650:+	26794648	2
NONRATT008543.2	224.11	0	448.22	Inf	Inf	6.45522e-06	0.00305665	Up	0.000189646	20.7291	13:103406815:103407314:+	26795569	1
NONRATT008544.2	19.1703	38.3406	0	0	#NAME?	0.0353581	0.912126	Down	0.359814	3.39918e-07	13:103408353:103410345:+	26797561	1
NONRATT008570.2	49.5689	3.28634	95.8514	29.1667	4.86625	0.0244285	0.775868	Up	0.100003	3.2116	13:109697161:109697848:+	26813623	1
NONRATT008580.2	1187.55	53.6768	2321.43	43.2483	5.43457	8.19137e-05	0.0182184	Up	0.608211	32.2871	13:110522778:110524750:+	26821854	2
NONRATT008595.2	19.1703	38.3406	0	0	#NAME?	0.0353581	0.912126	Down	2.57933	0.000107627	13:1291952:1729534:-	26835422	3
NONRATT008646.2	55.32	1.09545	109.545	100	6.64386	0.00617056	0.372239	Up	0.0105004	1.32741	13:35494715:35503484:-	26863515	3
NONRATT008709.2	29.577	59.154	0	0	#NAME?	0.0121684	0.560633	Down	3.41187	1.64978e-26	13:50557668:50558087:-	26909440	2
NONRATT008761.2	30.6725	61.3449	0	0	#NAME?	0.0109822	0.529759	Down	0.532705	1.94876e-08	13:53750469:53752636:-	26943374	1
NONRATT008780.2	261.172	483.091	39.2534	0.0812547	-3.6214	0.0124439	0.567278	Down	21.7763	2.16773	13:56993003:57030242:-	26955547	3
NONRATT008953.2	21.9089	0	43.8178	Inf	Inf	0.0323865	0.882007	Up	0.00210151	1.56657	13:89329326:89330063:-	27084056	2
NONRATT009063.2	64.1748	8.76356	119.586	13.6458	3.77039	0.0457797	1	Up	0.297183	4.66081	13:99471867:99472457:-	27147085	1
NONRATT009127.2	282.625	23.0043	542.245	23.5714	4.55897	0.00247793	0.209043	Up	0.680654	19.5999	13:110005607:110006245:-	27181420	1
NONRATT009130.2	60.0669	3.28634	116.847	35.5556	5.152	0.01421	0.605904	Up	0.0833341	3.18463	13:110219278:110220123:-	27184173	1
NONRATT009174.2	20.8135	41.6269	0	0	#NAME?	0.0297446	0.851114	Down	2.08517	0	14:2391740:2392116:+	27209213	1
NONRATT009298.2	19.1703	0	38.3406	Inf	Inf	0.0426918	0.977648	Up	0.00101815	1.7086	14:33067429:33070179:+	27292787	3
NONRATT009362.2	916.888	37.2451	1796.53	48.2353	5.59202	7.15243e-05	0.0164048	Up	1.05632	63.1878	14:44456586:44457242:+	27333721	1
NONRATT009365.2	23.0043	46.0087	0	0	#NAME?	0.0236306	0.76416	Down	1.67418	5.35437e-27	14:44496823:44498197:+	27337047	2
NONRATT009469.2	37.4277	0	74.8554	Inf	Inf	0.00780681	0.430812	Up	5.08288e-12	2.34872	14:81363725:81365099:+	27396584	5
NONRATT009502.2	63.901	0	127.802	Inf	Inf	0.00137491	0.137295	Up	7.48932e-11	3.14922	14:83251126:83252061:+	27415448	1
NONRATT009559.2	18.6226	37.2451	0	0	#NAME?	0.0375008	0.936181	Down	1.42842	0.015291	14:86414992:86434442:+	27449658	3
NONRATT009625.2	29.9422	58.0586	1.82574	0.0314465	-4.99095	0.0462605	1	Down	2.33092	0.0727282	14:107617198:107617910:+	27492678	2
NONRATT009634.2	756.496	226.757	1286.24	5.6723	2.50393	0.0426574	0.977648	Up	2.98579	20.6856	14:108046533:108050204:+	27498088	5
NONRATT009668.2	19.718	39.436	0	0	#NAME?	0.0333641	0.889409	Down	1.42602	2.5991e-07	14:4608:212674:-	27527351	2
NONRATT009709.2	83.5277	153.362	13.6931	0.0892857	-3.48543	0.0456734	1	Down	11.4183	1.21906	14:5451201:5451455:-	27558216	1
NONRATT009793.2	323.156	646.313	0	0	#NAME?	5.84834e-07	0.000990222	Down	28.3946	0.000100341	14:19028809:19029238:-	27622718	1
NONRATT009849.2	215.894	43.8178	387.97	8.85417	3.14636	0.0311248	0.868595	Up	1.16436	12.7834	14:36664532:36665233:-	27661050	1
NONRATT009875.2	62.5317	0	125.063	Inf	Inf	0.00148473	0.144334	Up	2.22575e-10	6.22912	14:42476229:42491422:-	27676536	7
NONRATT009907.2	139.669	0	279.339	Inf	Inf	6.08234e-05	0.0148518	Up	3.25776e-05	2.51147	14:45142769:45146313:-	27698454	2
NONRATT009921.2	54.042	106.258	1.82574	0.0171821	-5.86295	0.00911757	0.471256	Down	4.50253	0.0996033	14:47201337:47201780:-	27705504	1
NONRATT009925.2	19.718	39.436	0	0	#NAME?	0.0333641	0.889409	Down	1.28291	3.69064e-08	14:56912271:56912858:-	27707774	2
NONRATT009928.2	17.801	0	35.602	Inf	Inf	0.049269	1	Up	0.000121527	1.42051	14:59928051:59928626:-	27709258	1
NONRATT009947.2	42.4485	0	84.897	Inf	Inf	0.00529985	0.339593	Up	1.08032e-07	1.77674	14:66749800:66765729:-	27721282	5
NONRATT009960.2	1003.06	41.6269	1964.5	47.193	5.5605	7.04282e-05	0.0164048	Up	0.268939	15.5433	14:69896525:69899441:-	27730201	1
NONRATT010015.2	42.2659	3.28634	81.2455	24.7222	4.62774	0.0371326	0.935817	Up	0.126297	3.28954	14:86800341:86800912:-	27837706	1
NONRATT010016.2	339.223	83.2538	595.192	7.14912	2.83777	0.0361301	0.922355	Up	2.01669	17.5365	14:86802287:86803336:-	27838489	2
NONRATT010043.2	27.8426	0	55.6851	Inf	Inf	0.0180003	0.682755	Up	0.000201082	1.98853	14:81661628:81679571:-	27774073	6
NONRATT010196.2	38.8883	77.7766	0	0	#NAME?	0.00534409	0.339593	Down	6.02836	1.81229e-08	14:110728075:110728318:-	27879362	1
NONRATT010217.2	26.2907	52.5814	0	0	#NAME?	0.016798	0.657541	Down	2.1133	5.91348e-07	14:115006910:115052456:-	27892246	4
NONRATT010305.2	22.4566	44.9132	0	0	#NAME?	0.0250336	0.778536	Down	1.05248	4.81082e-18	15:18545518:18546561:+	27942390	2
NONRATT010360.2	560.503	1051.63	69.3782	0.0659722	-3.922	0.00354064	0.265169	Down	75.088	6.07043	15:27875918:27879677:+	27985416	2
NONRATT010364.2	110.092	203.753	16.4317	0.0806452	-3.63227	0.0293179	0.851114	Down	5.61187	0.544029	15:28017994:28034568:+	27987717	3
NONRATT010401.2	18.0748	36.1497	0	0	#NAME?	0.0398166	0.959718	Down	1.94596	0.000103533	15:33079283:33079628:+	28007974	1
NONRATT010431.2	212.699	0	425.398	Inf	Inf	8.37026e-06	0.00361374	Up	1.25675e-11	13.7941	15:34164603:34167066:+	28025033	3
NONRATT010455.2	329.09	569.631	88.5485	0.155449	-2.68549	0.0465345	1	Down	27.917	5.29152	15:34551644:34553109:+	28036725	3
NONRATT010747.2	103.154	0	206.309	Inf	Inf	0.000221197	0.0368971	Up	0.00125237	3.5739	15:8890578:8891909:-	28213762	1
NONRATT010833.2	40.1663	76.6812	3.65148	0.047619	-4.39232	0.0447714	1	Down	3.5013	0.188548	15:28308828:28309632:-	28262356	3
NONRATT010900.2	36.6974	2.19089	71.2039	32.5	5.02237	0.035543	0.912126	Up	0.0555702	2.30118	15:34396352:34397067:-	28311890	1
NONRATT010913.2	67.1873	6.57267	127.802	19.4444	4.28129	0.0262516	0.797819	Up	0.191715	4.25803	15:34473037:34474447:-	28318394	4
NONRATT010948.2	43.8178	0	87.6356	Inf	Inf	0.00479995	0.318817	Up	6.47988e-10	3.60959	15:38113401:38130925:-	28339905	5
NONRATT011059.2	20.8135	41.6269	0	0	#NAME?	0.0297446	0.851114	Down	2.3052	8.41649e-08	15:51989008:51995191:-	28409557	4
NONRATT011088.2	54.7723	0	109.545	Inf	Inf	0.00234133	0.203363	Up	0.00991167	3.37323	15:57185443:57186195:-	28425744	1
NONRATT011125.2	151.263	13.1453	289.38	22.0139	4.46034	0.00700594	0.404144	Up	0.342335	9.55502	15:69928503:69929201:-	28453701	1
NONRATT011233.2	60.7059	0	121.412	Inf	Inf	0.00164775	0.155047	Up	6.22668e-06	0.648424	16:1950294:1954629:+	28526482	1
NONRATT011297.2	147.885	268.384	27.3861	0.102041	-3.29278	0.0344025	0.900851	Down	6.77561	0.847622	16:7758239:7784619:+	28566021	4
NONRATT011342.2	286.368	522.527	50.2079	0.0960867	-3.37952	0.016923	0.65892	Down	4.11395	0.487613	16:18706166:18709135:+	28599894	2
NONRATT011369.2	27.9339	55.8677	0	0	#NAME?	0.0142524	0.605904	Down	1.29012	6.74944e-13	16:19763145:19765298:+	28618245	6
NONRATT011388.2	64.6313	129.263	0	0	#NAME?	0.000957502	0.104889	Down	7.36693	0.00416787	16:20025594:20025925:+	28627342	1
NONRATT011397.2	1619.8	333.015	2906.58	8.72807	3.12566	0.0110508	0.530116	Up	9.21249	98.3185	16:20294418:20295283:+	28632457	3
NONRATT011430.2	48.8386	0	97.6772	Inf	Inf	0.00340548	0.256354	Up	1.0315e-08	0.573043	16:21153726:21160176:+	28658131	6
NONRATT011433.2	43.2701	86.5402	0	0	#NAME?	0.00379217	0.275571	Down	1.9335	7.62438e-08	16:21263999:21266056:+	28661317	2
NONRATT011456.2	18.2574	0	36.5148	Inf	Inf	0.0469338	1	Up	7.99512e-09	1.22933	16:25879049:25879734:+	28675858	1
NONRATT011511.2	393.539	718.612	68.4653	0.0952744	-3.39177	0.0127238	0.576457	Down	18.0251	2.09219	16:49163593:49169307:+	28708064	3
NONRATT011637.2	116.117	13.1453	219.089	16.6667	4.05889	0.0167388	0.657541	Up	0.336737	6.9659	16:74546171:74550739:+	28787129	3
NONRATT011638.2	1716.65	21.9089	3411.4	155.708	7.2827	1.14813e-06	0.00118562	Up	0.242592	45.9992	16:74552812:74554523:+	28788840	1
NONRATT011760.2	121.412	21.9089	220.915	10.0833	3.3339	0.0395524	0.959718	Up	0.761984	9.53158	16:7728622:7734927:-	28855415	5
NONRATT011761.2	137.022	264.002	10.0416	0.038036	-4.71649	0.00550856	0.344924	Down	7.19595	0.337593	16:7741976:7758100:-	28856108	5
NONRATT011803.2	20.8135	41.6269	0	0	#NAME?	0.0297446	0.851114	Down	1.54202	9.33021e-15	16:9862178:9862691:-	28874958	1
NONRATT011819.2	85.8099	0	171.62	Inf	Inf	0.000458249	0.0600592	Up	1.71403e-29	7.12742	16:19046025:19052027:-	28897313	2
NONRATT011836.2	205.944	39.436	372.451	9.44444	3.23947	0.0282274	0.83036	Up	0.809571	9.45575	16:19769964:19770872:-	28908534	1
NONRATT011843.2	18.6226	37.2451	0	0	#NAME?	0.0375008	0.936181	Down	0.35943	0.000374749	16:19906346:19918703:-	28912651	6
NONRATT011977.2	38.3406	0	76.6812	Inf	Inf	0.00725592	0.409652	Up	2.81354e-08	1.27977	16:47857346:47861174:-	28989936	2
NONRATT012050.2	48.1996	96.3992	0	0	#NAME?	0.00266508	0.218552	Down	4.17773	1.20648e-06	16:68390462:68390897:-	29033949	1
NONRATT012139.2	84.897	169.794	0	0	#NAME?	0.000335244	0.0493268	Down	9.84759	0.0286502	16:81784347:81784673:-	29087049	1
NONRATT012167.2	72.2081	1.09545	143.321	130.833	7.03159	0.00255064	0.21153	Up	0.0295902	4.40485	16:88344424:88345177:-	29099916	1
NONRATT012181.2	21.9089	0	43.8178	Inf	Inf	0.0323865	0.882007	Up	8.75465e-09	1.60987	17:823958:825066:+	29108082	2
NONRATT012253.2	26.8384	53.6768	0	0	#NAME?	0.0158929	0.642525	Down	2.52803	2.26039e-28	17:9109696:9110258:+	29150667	2
NONRATT012330.2	77.3202	7.66812	146.972	19.1667	4.26053	0.0222251	0.747198	Up	0.265366	6.06769	17:15586382:15603195:+	29192009	4
NONRATT012412.2	316.401	1.09545	631.707	576.667	9.17159	4.21155e-06	0.00228968	Up	0.0186601	19.1264	17:30571948:30573328:+	29250782	2
NONRATT012472.2	22.3653	0	44.7307	Inf	Inf	0.0309265	0.865799	Up	0	2.8226	17:42308903:42309460:+	29288585	2
NONRATT012480.2	1230.46	371.356	2089.56	5.62684	2.49233	0.0387194	0.95374	Up	9.04239	62.2895	17:43633688:43634462:+	29290507	1
NONRATT012486.2	24.6475	0	49.295	Inf	Inf	0.0245779	0.775868	Up	4.06547e-23	1.65491	17:44025455:44036942:+	29294349	5
NONRATT012570.2	26.4733	0	52.9465	Inf	Inf	0.0205272	0.727823	Up	1.10728e-06	3.88462	17:62464422:62464735:+	29350458	1
NONRATT012579.2	195.811	0	391.622	Inf	Inf	1.25587e-05	0.00460872	Up	0.000603894	13.6909	17:69377547:69379938:+	29354403	3
NONRATT012581.2	69.8346	0	139.669	Inf	Inf	0.000997489	0.106102	Up	2.27577e-13	10.9356	17:69495324:69497132:+	29354697	2
NONRATT012586.2	51.1208	0	102.242	Inf	Inf	0.00293859	0.22703	Up	7.46503e-10	1.70064	17:70297312:70298695:+	29360335	1
NONRATT012600.2	31.494	0	62.9881	Inf	Inf	0.0129128	0.579653	Up	1.94486e-14	1.07503	17:70712375:70713734:+	29368907	1
NONRATT012636.2	341.87	0	683.74	Inf	Inf	7.26363e-07	0.000990222	Up	2.70561e-05	18.8182	17:80887573:80891202:+	29389167	5
NONRATT012705.2	42.1746	84.3493	0	0	#NAME?	0.00411983	0.289354	Down	0.862189	0.00124013	17:1029241:1031079:-	29434582	2
NONRATT012724.2	24.6475	49.295	0	0	#NAME?	0.0198936	0.719257	Down	1.34429	2.69492e-09	17:3718225:3718933:-	29447850	2
NONRATT012775.2	22.8218	0	45.6435	Inf	Inf	0.029532	0.851114	Up	1.83736e-17	1.44486	17:9523793:9524523:-	29479451	1
NONRATT012785.2	18.2574	0	36.5148	Inf	Inf	0.0469338	1	Up	0	3.11249	17:9826828:9829118:-	29483987	2
NONRATT012952.2	17.5271	35.0542	0	0	#NAME?	0.0423353	0.977648	Down	0.838705	3.24875e-06	17:42085029:42088445:-	29593140	2
NONRATT012972.2	55.0461	3.28634	106.806	32.5	5.02237	0.0182888	0.688361	Up	0.117776	4.47683	17:43617155:43617705:-	29603561	1
NONRATT012992.2	177.553	0	355.107	Inf	Inf	2.01092e-05	0.00614963	Up	5.39162e-05	6.95643	17:55230297:55231561:-	29628148	2
NONRATT013036.2	700.902	200.466	1201.34	5.99271	2.58321	0.0381276	0.945849	Up	6.47791	47.4618	17:44748559:44749143:+	29302751	1
NONRATT013186.2	36.0584	0	72.1168	Inf	Inf	0.00873182	0.459407	Up	8.67266e-23	2.19162	17:90709195:90710782:-	29732782	2
NONRATT013261.2	20.5396	0	41.0792	Inf	Inf	0.0371675	0.935817	Up	6.86931e-21	1.62476	18:16631414:16636079:+	29784771	3
NONRATT013283.2	16.4317	32.8634	0	0	#NAME?	0.0481315	1	Down	0.83927	3.57092e-07	18:24861718:24865116:+	29800633	2
NONRATT013369.2	95.395	10.9545	179.836	16.4167	4.03709	0.0217707	0.747198	Up	0.914169	17.7063	18:29587890:29588951:+	29871482	2
NONRATT013457.2	47.9257	0	95.8514	Inf	Inf	0.00361729	0.265491	Up	3.10642e-11	6.81982	18:52656384:52656709:+	29927064	1
NONRATT013587.2	22.4566	44.9132	0	0	#NAME?	0.0250336	0.778536	Down	0.906299	7.44509e-17	18:76922918:76923851:-	30258933	1
NONRATT013635.2	910.406	1657.41	163.404	0.09859	-3.34241	0.00816584	0.440685	Down	69.7363	8.40452	18:81715528:81726821:+	30051352	4
NONRATT013654.2	40.1663	0	80.3326	Inf	Inf	0.00629075	0.375374	Up	4.79605e-35	5.79778	18:1337000:1337319:-	30062195	1
NONRATT013743.2	452.51	73.3948	831.625	11.3308	3.50218	0.0094329	0.480783	Up	0.705859	9.77851	18:27730919:27736118:-	30117247	7
NONRATT013786.2	18.6226	37.2451	0	0	#NAME?	0.0375008	0.936181	Down	1.11978	0	18:31727300:31727934:-	30146942	1
NONRATT013887.2	32.8634	0	65.7267	Inf	Inf	0.0114513	0.540492	Up	1.09273e-12	4.99821	18:62387649:62387951:-	30220141	1
NONRATT013925.2	70.2911	0	140.582	Inf	Inf	0.000973926	0.105415	Up	4.90701e-15	4.18029	18:70176832:70184302:-	30244549	5
NONRATT013943.2	646.952	139.122	1154.78	8.30052	3.0532	0.0168907	0.65892	Up	5.13084	51.9237	18:73248924:73249783:-	30248629	3
NONRATT013978.2	89.2788	3.28634	175.271	53.3333	5.73697	0.00400015	0.283663	Up	0.0496977	3.59557	18:85963066:85964193:-	30276618	1
NONRATT014026.2	76.4073	2.19089	150.624	68.75	6.10329	0.00410206	0.289354	Up	0.0728432	5.17643	19:10338514:10339186:+	30301503	1
NONRATT014053.2	21.4525	0	42.9049	Inf	Inf	0.0339113	0.891533	Up	6.28251e-10	0.401391	19:14379469:14390499:+	30319423	6
NONRATT014177.2	32.8634	0	65.7267	Inf	Inf	0.0114513	0.540492	Up	3.3781e-13	2.78452	19:32323793:32324337:+	30396570	1
NONRATT014286.2	125.246	248.666	1.82574	0.00734214	-7.08958	0.000452528	0.0600592	Down	6.88149	0.0559366	19:43750746:43834328:+	30466423	5
NONRATT014316.2	21.9089	0	43.8178	Inf	Inf	0.0323865	0.882007	Up	2.49481e-29	1.58424	19:49457741:49470479:+	30485897	6
NONRATT014358.2	41.9921	0	83.9841	Inf	Inf	0.00548113	0.344924	Up	1.03395e-07	3.81228	19:55118678:55145817:+	30509149	4
NONRATT014456.2	28.4816	56.9631	0	0	#NAME?	0.0135106	0.589673	Down	1.04131	3.78134e-18	19:10583880:10587243:-	30568596	3
NONRATT014530.2	602.951	1106.4	99.5029	0.089934	-3.47499	0.00791884	0.432121	Down	50.735	5.59719	19:22621344:22632069:-	30617468	3
NONRATT014570.2	210.508	395.456	25.5604	0.0646353	-3.95153	0.00929345	0.478661	Down	17.0095	1.36034	19:25886497:25886935:-	30644205	1
NONRATT014582.2	64.7225	124.881	4.56435	0.0365497	-4.774	0.0163167	0.650852	Down	3.49628	0.146525	19:26080942:26084723:-	30652065	4
NONRATT014662.2	32.4069	0	64.8138	Inf	Inf	0.0119161	0.555291	Up	2.81881e-15	3.22644	19:39249614:39252131:-	30707618	2
NONRATT014728.2	68.9218	0	137.844	Inf	Inf	0.00104668	0.110534	Up	1.74684e-14	8.69198	19:43989579:43991986:-	30750777	2
NONRATT014777.2	17.5271	35.0542	0	0	#NAME?	0.0423353	0.977648	Down	1.57132	8.8101e-24	19:53654618:53656989:-	30775145	3
NONRATT014799.2	26.2907	52.5814	0	0	#NAME?	0.016798	0.657541	Down	1.3967	1.68531e-06	19:55720364:55862204:-	30792370	7
NONRATT014811.2	66.457	8.76356	124.15	14.1667	3.82443	0.0417425	0.977648	Up	0.101233	1.75456	19:56615327:56616965:-	30799795	1
NONRATT014828.2	37.2451	74.4903	0	0	#NAME?	0.00612495	0.371521	Down	1.92013	6.51102e-11	19:57604728:57613181:-	30806260	4
NONRATT014913.2	1221.15	319.87	2122.42	6.63527	2.73016	0.0248845	0.778536	Up	14.3476	116.318	2:19824388:19824809:+	30860515	1
NONRATT014946.2	94.0257	180.748	7.30297	0.040404	-4.62936	0.0107612	0.523059	Down	6.636	0.31433	2:27236102:27236615:+	30877877	1
NONRATT014960.2	87.1792	0	174.358	Inf	Inf	0.000430916	0.059116	Up	1.61718e-29	10.6371	2:29625329:29655244:+	30885738	4
NONRATT014982.2	406.867	24.0998	789.633	32.7652	5.03409	0.00063668	0.0766051	Up	0.48316	19.4336	2:34315072:34338342:+	30898036	10
NONRATT015273.2	23.2782	0	46.5564	Inf	Inf	0.0282017	0.83036	Up	3.16368e-06	1.3182	2:140525774:140531190:+	31095316	5
NONRATT015280.2	26.2907	52.5814	0	0	#NAME?	0.016798	0.657541	Down	2.56136	2.13661e-27	2:141451227:141451615:+	31098824	1
NONRATT015405.2	17.801	0	35.602	Inf	Inf	0.049269	1	Up	5.24958e-26	1.15564	2:187525294:187526470:+	31184042	2
NONRATT015437.2	47.9257	0	95.8514	Inf	Inf	0.00361729	0.265491	Up	8.20885e-16	2.03316	2:188388180:188389263:+	31208699	1
NONRATT015468.2	17.5271	35.0542	0	0	#NAME?	0.0423353	0.977648	Down	1.14322	1.24589e-13	2:189430047:189438081:+	31231221	4
NONRATT015553.2	24.0998	48.1996	0	0	#NAME?	0.0210636	0.739551	Down	0.48018	1.62476e-19	2:196340775:196344046:+	31274246	6
NONRATT015584.2	2648.79	817.202	4480.37	5.48257	2.45485	0.0412459	0.971827	Up	25.7926	173.159	2:198390146:198390743:+	31302558	1
NONRATT015585.2	3609.31	627.69	6590.93	10.5003	3.39236	0.00725062	0.409652	Up	17.6736	226.971	2:198418649:198419319:+	31303228	1
NONRATT015594.2	90.8307	0	181.661	Inf	Inf	0.000367055	0.0518077	Up	9.48138e-21	7.39262	2:198755299:198757284:+	31309264	5
NONRATT015614.2	443.108	804.057	82.1584	0.10218	-3.29082	0.0138833	0.599399	Down	24.6816	3.07841	2:200480172:200480786:+	31323369	1
NONRATT015676.2	18.0748	36.1497	0	0	#NAME?	0.0398166	0.959718	Down	0.884293	0.000165185	2:209160946:209186415:+	31361447	7
NONRATT015679.2	25.1952	50.3905	0	0	#NAME?	0.018795	0.693313	Down	1.58219	4.53153e-09	2:209163302:209181190:+	31363831	5
NONRATT015697.2	31.2202	62.4404	0	0	#NAME?	0.0104384	0.515908	Down	4.09276	0.00188646	2:211078317:211078606:+	31375882	1
NONRATT015713.2	22.4566	44.9132	0	0	#NAME?	0.0250336	0.778536	Down	2.45126	2.39364e-16	2:217207522:217207866:+	31387377	1
NONRATT015751.2	31.0376	0	62.0752	Inf	Inf	0.0134467	0.589673	Up	1.52427e-06	1.58978	2:225837427:225847260:+	31406761	6
NONRATT015776.2	288.285	518.146	58.4237	0.112755	-3.14873	0.0244196	0.775868	Down	25.2969	3.4662	2:237699662:237704796:+	31429074	2
NONRATT015794.2	353.281	0	706.562	Inf	Inf	6.09718e-07	0.000990222	Up	6.62393e-09	27.8197	2:240648107:240654800:+	31441615	3
NONRATT015823.2	94.0257	0	188.051	Inf	Inf	0.00032031	0.0479778	Up	3.11691e-29	20.8205	2:243554667:243554967:+	31460673	2
NONRATT015837.2	149.254	0	298.509	Inf	Inf	4.51041e-05	0.0119712	Up	0.00199634	17.5483	2:250601084:250621284:+	31469407	3
NONRATT015855.2	47.5606	94.2083	0.912871	0.00968992	-6.6893	0.00734003	0.412813	Down	0.767248	0.0131484	2:251763185:251766013:+	31481674	2
NONRATT015858.2	29.6683	0	59.3366	Inf	Inf	0.0152051	0.6252	Up	0.0128469	1.86523	2:251818419:251824227:+	31482733	3
NONRATT015905.2	256.06	0	512.121	Inf	Inf	3.28976e-06	0.0020121	Up	0.000161388	4.96198	2:264825240:264833283:+	31525367	4
NONRATT015997.2	71.6604	142.408	0.912871	0.00641026	-7.2854	0.0018774	0.173323	Down	7.72082	0.0393547	2:26998279:27246430:-	31581972	2
NONRATT016045.2	22.3653	0	44.7307	Inf	Inf	0.0309265	0.865799	Up	1.29178e-07	1.5239	2:30766622:30770548:-	31615659	3
NONRATT016046.2	70.7475	0	141.495	Inf	Inf	0.000951021	0.104889	Up	0	4.19555	2:30782133:30782910:-	31616436	1
NONRATT016047.2	591.358	3.28634	1179.43	358.889	8.48739	8.46294e-07	0.00103523	Up	0.0897943	41.9218	2:30783113:30783762:-	31617085	1
NONRATT016121.2	34.4152	2.19089	66.6396	30.4167	4.92679	0.0418135	0.977648	Up	0.0316458	1.47817	2:51042551:51045615:-	31674942	2
NONRATT016343.2	644.213	24.0998	1264.33	52.4621	5.7132	8.61519e-05	0.0185974	Up	0.41576	26.5709	2:123274271:123275369:-	31814324	1
NONRATT016386.2	44.7307	0	89.4614	Inf	Inf	0.00449957	0.305783	Up	5.02638e-07	3.08188	2:143892697:143905048:+	31103074	9
NONRATT016429.2	99.5029	5.47723	193.529	35.3333	5.14296	0.0059109	0.361525	Up	0.110543	4.79683	2:152785959:152788350:-	31863416	2
NONRATT016453.2	27.3861	0	54.7723	Inf	Inf	0.0187982	0.693313	Up	0.00219453	1.47548	2:157896731:157897585:-	31874164	1
NONRATT016511.2	48.1083	2.19089	94.0257	42.9167	5.42347	0.017152	0.666071	Up	0.114576	5.1095	2:183073043:183085783:-	31905828	4
NONRATT016524.2	31.0376	0	62.0752	Inf	Inf	0.0134467	0.589673	Up	1.11946e-17	1.65781	2:184232015:184309664:-	31913819	5
NONRATT016580.2	19.6267	0	39.2534	Inf	Inf	0.0407517	0.964829	Up	3.3273e-32	1.09566	2:188225945:188228119:-	31949148	2
NONRATT016603.2	18.7139	0	37.4277	Inf	Inf	0.0447474	1	Up	1.0531e-30	1.11096	2:189101366:189102150:-	31962255	1
NONRATT016675.2	44.2742	0	88.5485	Inf	Inf	0.0046467	0.311456	Up	7.88438e-11	2.99226	2:198010143:198017086:-	32010765	3
NONRATT016680.2	158.566	29.577	287.554	9.72222	3.28129	0.0333854	0.889409	Up	0.680827	8.11872	2:198379863:198380681:-	32012574	1
NONRATT016723.2	70.1085	140.217	0	0	#NAME?	0.00070619	0.0822712	Down	7.50801	1.88864e-13	2:204699083:204699434:-	32036588	1
NONRATT016724.2	16.9794	33.9588	0	0	#NAME?	0.045093	1	Down	0.919648	2.71709e-05	2:204699167:204699867:-	32037288	1
NONRATT016756.2	24.0085	47.1041	0.912871	0.0193798	-5.6893	0.0473228	1	Down	1.52145	0.027368	2:209317002:209317580:-	32057974	1
NONRATT016762.2	44.2742	0	88.5485	Inf	Inf	0.0046467	0.311456	Up	1.28726e-09	3.14195	2:210761304:210763655:-	32064063	2
NONRATT016849.2	26.4733	0	52.9465	Inf	Inf	0.0205272	0.727823	Up	9.78338e-13	2.32373	2:227718790:227719470:-	32123525	2
NONRATT016865.2	92.6564	0	185.313	Inf	Inf	0.00033941	0.0493288	Up	8.14119e-07	16.2945	2:231870913:231871306:-	32131369	2
NONRATT016869.2	26.0168	0	52.0336	Inf	Inf	0.0214626	0.739551	Up	4.962e-21	3.26305	2:232148092:232155852:-	32133065	5
NONRATT017137.2	273.77	497.332	50.2079	0.100954	-3.30822	0.0197239	0.718431	Down	17.7287	2.1715	20:5354223:5418017:+	32282864	7
NONRATT017171.2	192.798	35.0542	350.542	10	3.32193	0.0265146	0.799079	Up	1.37606	16.6919	20:6295310:6296040:+	32302789	3
NONRATT017433.2	98854.4	6688.79	191020	28.5582	4.83584	0.0427967	0.978523	Up	589.248	20594.3	20:45357178:45357392:+	32471246	1
NONRATT017491.2	26.0168	0	52.0336	Inf	Inf	0.0214626	0.739551	Up	5.87191e-07	2.51702	20:2082259:2082739:-	32502136	1
NONRATT017519.2	396.825	62.4404	731.21	11.7105	3.54973	0.00967287	0.491308	Up	1.30404	18.8102	20:3403204:3404101:-	32520410	1
NONRATT017590.2	18.2574	0	36.5148	Inf	Inf	0.0469338	1	Up	1.41078e-11	1.15848	20:5483706:5484427:-	32549910	1
NONRATT017751.2	34.6891	0	69.3782	Inf	Inf	0.00979166	0.495627	Up	3.04706e-32	4.42917	20:32223481:32223841:-	32644901	1
NONRATT017766.2	20.996	0	41.9921	Inf	Inf	0.0355026	0.912126	Up	6.03258e-12	2.9288	20:33487635:33488954:-	32655459	2
NONRATT017864.2	83.2538	166.508	0	0	#NAME?	0.000362352	0.0516405	Down	8.06685	1.01929e-08	3:2299330:2299720:+	32703333	1
NONRATT017993.2	154.184	4.38178	303.986	69.375	6.11634	0.000818952	0.0931891	Up	0.225457	19.5383	3:8633304:8635344:+	32786087	4
NONRATT018055.2	232.326	49.295	415.356	8.42593	3.07484	0.0326617	0.884578	Up	0.476445	4.86383	3:12009543:12011950:+	32823724	2
NONRATT018152.2	24.6475	0	49.295	Inf	Inf	0.0245779	0.775868	Up	2.46096e-17	2.45901	3:43352634:43355914:+	32879453	2
NONRATT018154.2	29.0293	58.0586	0	0	#NAME?	0.012817	0.577118	Down	0.856115	5.18943e-08	3:43357780:43359069:+	32881225	1
NONRATT018220.2	32.8634	65.7267	0	0	#NAME?	0.00898249	0.47041	Down	1.66424	1.42829e-12	3:55960321:55971381:+	32912894	7
NONRATT018244.2	56.9631	4.38178	109.545	25	4.64386	0.0237499	0.764527	Up	0.107085	3.47996	3:57866414:57868845:+	32929791	2
NONRATT018259.2	25.104	0	50.2079	Inf	Inf	0.0234857	0.76416	Up	2.72572e-32	2.21438	3:58802586:58864635:+	32938251	7
NONRATT018425.2	85.8099	0	171.62	Inf	Inf	0.000458249	0.0600592	Up	0	8.3598	3:95996122:96023182:+	33055685	4
NONRATT018427.2	127.802	0	255.604	Inf	Inf	8.99331e-05	0.0191323	Up	0	16.4397	3:96023066:96024389:+	33056358	2
NONRATT018439.2	177.371	30.6725	324.069	10.5655	3.40129	0.0255347	0.78675	Up	0.778575	9.9176	3:101185741:101190869:+	33065761	3
NONRATT018464.2	16.9794	33.9588	0	0	#NAME?	0.045093	1	Down	0.9228	0	3:107788262:107788965:+	33078827	1
NONRATT018485.2	1207.64	26.2907	2388.98	90.8681	6.5057	7.73015e-06	0.00353161	Up	0.36389	39.6773	3:111439421:111452357:+	33097522	6
NONRATT018507.2	103.154	16.4317	189.877	11.5556	3.53051	0.0362415	0.923592	Up	0.53605	7.44749	3:112660106:112660694:+	33113752	1
NONRATT018517.2	33.3198	0	66.6396	Inf	Inf	0.0110073	0.529759	Up	8.27211e-15	3.26978	3:113383824:113384293:+	33120102	1
NONRATT018552.2	129.628	0	259.255	Inf	Inf	8.45453e-05	0.018523	Up	5.36738e-24	13.8947	3:117524577:117525446:+	33137906	2
NONRATT018556.2	649.325	69.013	1229.64	17.8175	4.15522	0.00198687	0.178928	Up	1.03511	22.5909	3:117938795:117940221:+	33140612	2
NONRATT018586.2	181.661	10.9545	352.368	32.1667	5.00749	0.00246667	0.209043	Up	0.237991	9.77819	3:121795297:121796128:-	33874255	1
NONRATT018984.2	19.6267	0	39.2534	Inf	Inf	0.0407517	0.964829	Up	3.51107e-26	1.92243	3:176853934:176862722:+	33425803	3
NONRATT019015.2	569.905	25.1952	1114.62	44.2391	5.46725	0.000168516	0.0313119	Up	1.70254	92.1855	3:1260420:1260699:-	33442659	1
NONRATT019196.2	21.9089	0	43.8178	Inf	Inf	0.0323865	0.882007	Up	1.23489e-14	0.765603	3:12020226:12024616:-	33549907	5
NONRATT019258.2	175.545	19.718	331.372	16.8056	4.07087	0.00990711	0.497229	Up	0.762878	15.75	3:23075469:23075954:-	33595174	1
NONRATT019381.2	31.9505	0	63.901	Inf	Inf	0.0124029	0.567174	Up	5.98972e-08	2.31124	3:60100148:60105134:-	33669876	3
NONRATT019417.2	117.304	0	234.608	Inf	Inf	0.000129884	0.0261173	Up	1.15348e-05	2.84641	3:71747937:71749841:-	33695927	1
NONRATT019458.2	227.305	38.3406	416.269	10.8571	3.44057	0.0191426	0.704248	Up	2.94069	38.5427	3:80539238:80539566:-	33717516	2
NONRATT019484.2	92.5651	185.13	0	0	#NAME?	0.000236704	0.0386064	Down	6.54741	9.9629e-06	3:82324818:82325645:-	33733393	2
NONRATT019585.2	39.7099	0	79.4198	Inf	Inf	0.00651631	0.381087	Up	1.69839e-24	3.13444	3:110012040:110017165:-	33806678	4
NONRATT019591.2	402.576	755.857	49.295	0.0652174	-3.9386	0.004692	0.313063	Down	9.68108	0.774473	3:110303514:110304986:-	33811049	1
NONRATT019628.2	290.476	35.0542	545.897	15.5729	3.96097	0.00649191	0.381087	Up	1.29494	24.3116	3:113369346:113369864:-	33834368	1
NONRATT019666.2	33.7762	0	67.5524	Inf	Inf	0.0105834	0.517844	Up	1.61241e-17	1.65681	3:119583801:119589746:-	33857580	5
NONRATT019675.2	66.1831	0	132.366	Inf	Inf	0.0012125	0.124464	Up	2.17774e-14	1.88925	3:121736865:121739165:+	33164968	2
NONRATT019778.2	53.8594	0	107.719	Inf	Inf	0.00247594	0.209043	Up	0.0110851	3.9505	3:144213953:144338980:-	33946003	3
NONRATT019792.2	146.151	12.0499	280.251	23.2576	4.53963	0.00661857	0.385532	Up	0.186148	5.38128	3:146634946:146636147:-	33955302	1
NONRATT019832.2	24.0998	48.1996	0	0	#NAME?	0.0210636	0.739551	Down	1.95392	7.83389e-23	3:149868098:149868568:-	33982378	1
NONRATT019853.2	165.595	300.152	31.0376	0.103406	-3.2736	0.0319905	0.882007	Down	13.6027	1.71147	3:151248289:151258581:-	33997401	4
NONRATT019865.2	29.3032	1.09545	57.5109	52.5	5.71425	0.0367389	0.933029	Up	0.0205656	2.00252	3:152942334:152943777:+	33311415	2
NONRATT020006.2	72.8471	3.28634	142.408	43.3333	5.43741	0.00784418	0.431254	Up	0.176035	8.45237	3:165672194:165672582:-	34082429	1
NONRATT020072.2	20.5396	0	41.0792	Inf	Inf	0.0371675	0.935817	Up	5.14643e-23	1.60306	3:175552246:175552941:+	33407897	2
NONRATT020210.2	45.3697	2.19089	88.5485	40.4167	5.33688	0.0201801	0.72236	Up	0.0446519	2.51989	4:27648058:27655336:+	34211536	3
NONRATT020232.2	325.438	0	650.877	Inf	Inf	9.43428e-07	0.00106528	Up	3.37458e-08	13.4323	4:33942099:33943217:+	34226510	1
NONRATT020362.2	97.4946	194.989	0	0	#NAME?	0.000191546	0.0338759	Down	6.71192	0.00044333	4:62789127:62790328:+	34307507	2
NONRATT020463.2	47.9257	0	95.8514	Inf	Inf	0.00361729	0.265491	Up	1.98998e-09	2.11552	4:81244481:81257211:+	34381326	7
NONRATT020472.2	119.13	0	238.259	Inf	Inf	0.000121649	0.0248013	Up	0.00122314	13.5196	4:82793862:82801540:+	34386073	3
NONRATT020558.2	19.1703	38.3406	0	0	#NAME?	0.0353581	0.912126	Down	1.09632	0.00340765	4:100210075:100210735:+	34446286	1
NONRATT020560.2	90.7394	174.176	7.30297	0.0419287	-4.57592	0.0120414	0.557591	Down	3.36023	0.18162	4:100218028:100219006:+	34448460	1
NONRATT020716.2	33.8675	1.09545	66.6396	60.8333	5.92679	0.0254517	0.78675	Up	0.0405314	2.28671	4:122365077:122377570:+	34548505	3
NONRATT020750.2	35.1455	0	70.2911	Inf	Inf	0.00942216	0.480783	Up	1.96361e-18	1.26636	4:130422086:130423373:+	34571128	1
NONRATT020755.2	72.8471	8.76356	136.931	15.625	3.96578	0.0325204	0.882748	Up	0.455657	8.85354	4:135168018:135168376:+	34573402	1
NONRATT020790.2	21.4525	0	42.9049	Inf	Inf	0.0339113	0.891533	Up	4.97883e-18	1.35507	4:145440475:145446397:+	34595161	5
NONRATT020860.2	105.893	0	211.786	Inf	Inf	0.000198816	0.0343344	Up	2.73635e-05	2.90112	4:152966561:152968248:+	34630566	1
NONRATT020977.2	68.5566	6.57267	130.541	19.8611	4.31187	0.0247959	0.778536	Up	0.228479	5.4302	4:168697908:168720239:+	34710161	3
NONRATT021115.2	206.035	40.5315	371.538	9.16667	3.1964	0.0300519	0.856567	Up	0.543826	6.17769	4:7818642:7822858:-	34806638	4
NONRATT021123.2	18.0748	36.1497	0	0	#NAME?	0.0398166	0.959718	Down	0.827549	1.08299e-27	4:8238850:8255485:-	34814900	2
NONRATT021240.2	27.8426	0	55.6851	Inf	Inf	0.0180003	0.682755	Up	3.14711e-25	1.79614	4:34740520:34779792:-	34901330	6
NONRATT021258.2	28.4816	56.9631	0	0	#NAME?	0.0135106	0.589673	Down	1.78604	5.18689e-21	4:48879767:48927622:-	34913388	6
NONRATT021453.2	20.5396	0	41.0792	Inf	Inf	0.0371675	0.935817	Up	1.26849e-17	1.34961	4:88624428:88631498:-	35048391	6
NONRATT021459.2	31.0376	0	62.0752	Inf	Inf	0.0134467	0.589673	Up	6.24631e-16	4.48923	4:89595454:90018433:-	35052801	2
NONRATT021493.2	254.326	466.66	41.9921	0.0899844	-3.47418	0.01615	0.647722	Down	15.4465	1.69741	4:100222884:100224722:-	35079900	5
NONRATT021555.2	32.4069	0	64.8138	Inf	Inf	0.0119161	0.555291	Up	2.82016e-60	2.11033	4:116915337:116916686:-	35124269	2
NONRATT021559.2	17.5271	35.0542	0	0	#NAME?	0.0423353	0.977648	Down	2.73945	4.81152e-23	4:117068076:117111508:-	35126165	4
NONRATT021609.2	67.9176	4.38178	131.453	30	4.90689	0.0142818	0.605904	Up	0.287793	9.93376	4:120825703:120826314:-	35163828	2
NONRATT021769.2	1713.73	386.692	3040.77	7.86355	2.97518	0.0148915	0.621	Up	5.93079	57.0339	4:150515483:150516713:-	35256789	1
NONRATT021884.2	20.8135	41.6269	0	0	#NAME?	0.0297446	0.851114	Down	0.221594	0.000518795	4:165424758:165460050:-	35360670	9
NONRATT021925.2	30.6725	61.3449	0	0	#NAME?	0.0109822	0.529759	Down	1.49046	1.27688e-05	4:170914249:170932341:-	35380860	6
NONRATT021929.2	43.3614	0	86.7227	Inf	Inf	0.00495965	0.32378	Up	3.35851e-20	1.39713	4:171069163:171070592:-	35383042	1
NONRATT022059.2	25.5604	0	51.1208	Inf	Inf	0.022448	0.747198	Up	0	1.92653	5:14617451:14618067:+	35469406	1
NONRATT022146.2	381.854	85.4447	678.263	7.93803	2.98878	0.0261377	0.796008	Up	3.76689	36.4144	5:36623798:36624228:+	35528839	1
NONRATT022149.2	26.0168	0	52.0336	Inf	Inf	0.0214626	0.739551	Up	1.23166e-05	1.55455	5:37605982:37606759:+	35531550	1
NONRATT022152.2	207.861	24.0998	391.622	16.25	4.02237	0.00866778	0.45933	Up	0.349309	6.80424	5:38844525:38850520:+	35534359	5
NONRATT022179.2	840.206	59.154	1621.26	27.4074	4.77649	0.000440914	0.0599275	Up	0.568792	19.0899	5:50120611:50122570:+	35554640	1
NONRATT022193.2	20.996	0	41.9921	Inf	Inf	0.0355026	0.912126	Up	1.03405e-29	2.26372	5:57291496:57296333:+	35560734	2
NONRATT022275.2	181.296	28.4816	334.111	11.7308	3.55223	0.0201598	0.72236	Up	0.762655	11.0922	5:69844144:69849113:+	35616690	3
NONRATT022322.2	76.7724	143.503	10.0416	0.0699746	-3.83703	0.0338522	0.891533	Down	4.81673	0.400631	5:78563867:78565306:+	35654905	3
NONRATT022342.2	53.6768	3.28634	104.067	31.6667	4.98489	0.0196307	0.717145	Up	0.117528	4.0981	5:98902786:98903372:+	35667847	1
NONRATT022378.2	21.9089	0	43.8178	Inf	Inf	0.0323865	0.882007	Up	3.00047e-30	3.84138	5:107747140:107747402:+	35688270	1
NONRATT022381.2	60.5233	3.28634	117.76	35.8333	5.16323	0.0138947	0.599399	Up	0.0449252	2.12799	5:107841688:107844601:+	35692995	3
NONRATT022384.2	535.49	926.747	144.234	0.155634	-2.68377	0.0358909	0.919445	Down	24.6712	4.68922	5:112836483:112837191:+	35694325	1
NONRATT022443.2	105.893	0	211.786	Inf	Inf	0.000198816	0.0343344	Up	2.04481e-05	7.5881	5:125996098:125999459:+	35731457	6
NONRATT022451.2	19.6267	0	39.2534	Inf	Inf	0.0407517	0.964829	Up	0	2.76432	5:126856699:126876092:+	35735888	4
NONRATT022478.2	53.8594	0	107.719	Inf	Inf	0.00247594	0.209043	Up	1.65283e-21	6.97492	5:128677190:128681240:+	35750278	4
NONRATT022513.2	139.213	0	278.426	Inf	Inf	6.17179e-05	0.0148518	Up	1.21117e-05	4.75	5:134663842:134665195:+	35771242	1
NONRATT022568.2	178.101	1.09545	355.107	324.167	8.34059	6.88396e-05	0.0162983	Up	0.0252167	12.2843	5:138188803:138189470:+	35807935	1
NONRATT022586.2	54.2245	108.449	0	0	#NAME?	0.00179229	0.167573	Down	1.67426	0.00173814	5:139597710:139598927:+	35817577	1
NONRATT022729.2	19.718	39.436	0	0	#NAME?	0.0333641	0.889409	Down	0.480614	0.000317658	5:153261443:153264030:+	35917273	3
NONRATT022803.2	214.981	0	429.962	Inf	Inf	7.93945e-06	0.00353161	Up	2.97175e-06	6.77395	5:158114263:158115726:+	35956911	1
NONRATT022837.2	57.6022	6.57267	108.632	16.5278	4.04682	0.0398864	0.959825	Up	0.15155	3.0919	5:164206506:164207418:+	35978973	2
NONRATT022862.2	26.0168	0	52.0336	Inf	Inf	0.0214626	0.739551	Up	7.22758e-06	1.68299	5:166464252:166511494:+	35992317	2
NONRATT022970.2	23.5521	47.1041	0	0	#NAME?	0.0223082	0.747198	Down	2.93743	0.000600845	5:1260964:1261265:-	36058643	1
NONRATT023007.2	28.7554	0	57.5109	Inf	Inf	0.0165275	0.655693	Up	6.28264e-19	4.56204	5:9674826:9675116:-	36079418	1
NONRATT023017.2	21.9089	43.8178	0	0	#NAME?	0.0265199	0.799079	Down	2.66376	2.01218e-25	5:13065143:13065457:-	36083896	1
NONRATT023053.2	34.8717	2.19089	67.5524	30.8333	4.94642	0.0404598	0.964829	Up	0.0904982	2.75081	5:24448290:24448856:-	36109023	1
NONRATT023201.2	27.3861	0	54.7723	Inf	Inf	0.0187982	0.693313	Up	4.32427e-19	3.20962	5:59533735:59553426:-	36204354	3
NONRATT023256.2	111.37	0	222.741	Inf	Inf	0.000161481	0.0303895	Up	1.67141e-23	10.9485	5:74251268:74251738:-	36243263	1
NONRATT023284.2	20.2657	40.5315	0	0	#NAME?	0.0314985	0.874038	Down	1.03288	1.62372e-30	5:76681887:76682624:-	36256049	1
NONRATT023285.2	32.4069	0	64.8138	Inf	Inf	0.0119161	0.555291	Up	0.000194497	4.07422	5:76717797:76756125:-	36256417	3
NONRATT023334.2	252.591	35.0542	470.129	13.4115	3.74539	0.0107255	0.523057	Up	0.225651	3.75929	5:92862228:92865113:-	36288390	1
NONRATT023355.2	69.1043	2.19089	136.018	62.0833	5.95613	0.00572903	0.356013	Up	0.0371639	3.16193	5:101561714:101562705:-	36305323	1
NONRATT023414.2	39.7099	0	79.4198	Inf	Inf	0.00651631	0.381087	Up	1.10869e-13	2.96407	5:118476425:118510209:-	36349809	6
NONRATT023440.2	47.9257	0	95.8514	Inf	Inf	0.00361729	0.265491	Up	1.22497e-16	3.25149	5:126275931:126282349:-	36370962	6
NONRATT023504.2	42.7224	85.4447	0	0	#NAME?	0.00395169	0.281587	Down	1.93761	1.30135e-13	5:135988950:135989895:-	36416827	2
NONRATT023579.2	45.1871	0	90.3742	Inf	Inf	0.00435825	0.299947	Up	1.43692e-12	3.15753	5:141040646:141041995:-	36459059	2
NONRATT023594.2	115.843	20.8135	210.873	10.1316	3.34079	0.0409082	0.966976	Up	0.432123	5.23586	5:142913252:143239979:-	36466533	4
NONRATT023610.2	35.602	0	71.2039	Inf	Inf	0.00906914	0.47041	Up	8.38762e-18	2.04318	5:144405766:144424177:-	36478403	5
NONRATT023671.2	222.101	14.2408	429.962	30.1923	4.91611	0.00201771	0.180597	Up	0.754847	27.0197	5:150955955:151712587:-	36511611	8
NONRATT023801.2	29.3944	56.9631	1.82574	0.0320513	-4.96347	0.048333	1	Down	0.437971	0.0168725	5:160230952:160233411:-	36603084	1
NONRATT023852.2	22.3653	0	44.7307	Inf	Inf	0.0309265	0.865799	Up	2.3034e-17	1.52263	5:165432094:165436319:-	36640208	5
NONRATT023880.2	47.9257	5.47723	90.3742	16.5	4.04439	0.0497466	1	Up	0.152548	2.82051	5:167233596:167241003:-	36660102	4
NONRATT024029.2	19.6267	0	39.2534	Inf	Inf	0.0407517	0.964829	Up	3.71613e-12	0.533556	6:12203739:12205450:+	36753299	1
NONRATT024110.2	18.0748	36.1497	0	0	#NAME?	0.0398166	0.959718	Down	2.28014	3.44859e-24	6:28168941:28177073:+	36807661	4
NONRATT024191.2	26.0168	0	52.0336	Inf	Inf	0.0214626	0.739551	Up	0	2.13838	6:49874876:49895502:+	36865324	4
NONRATT024226.2	361.406	689.035	33.7762	0.0490196	-4.3505	0.00251076	0.209406	Down	17.8491	1.07271	6:52281441:52285192:+	36877993	4
NONRATT024227.2	462.552	89.8265	835.277	9.29878	3.21704	0.0154687	0.634262	Up	1.79932	20.3766	6:52284358:52285304:+	36878939	1
NONRATT024242.2	104.798	14.2408	195.354	13.7179	3.77799	0.0265338	0.799079	Up	0.561196	9.36798	6:57396157:57396638:+	36890786	1
NONRATT024267.2	30.1247	0	60.2495	Inf	Inf	0.0145917	0.611976	Up	2.82263e-16	6.44627	6:71792466:71792682:+	36903271	1
NONRATT024282.2	23.0043	46.0087	0	0	#NAME?	0.0236306	0.76416	Down	1.93554	9.13101e-06	6:75533322:75533770:+	36914486	1
NONRATT024283.2	52.4901	0	104.98	Inf	Inf	0.00269546	0.219814	Up	6.16337e-26	5.45372	6:75565555:75566000:+	36914931	1
NONRATT024451.2	165.869	330.824	0.912871	0.00275938	-8.50144	6.15332e-05	0.0148518	Down	16.2569	0.046769	6:104611042:104612771:+	37022083	4
NONRATT024452.2	85.9924	2.19089	169.794	77.5	6.27612	0.00272957	0.22128	Up	0.0446883	4.30253	6:104611047:104613331:+	37022995	4
NONRATT024455.2	287.554	0	575.109	Inf	Inf	1.80728e-06	0.00139627	Up	0.00115113	17.7466	6:104611082:104614941:+	37024501	7
NONRATT024738.2	20.996	0	41.9921	Inf	Inf	0.0355026	0.912126	Up	4.66786e-11	0.394974	6:145622809:145625236:+	37221806	1
NONRATT024745.2	146.972	0	293.944	Inf	Inf	4.83702e-05	0.0122418	Up	0.00523168	4.96237	6:963901:988572:-	37226574	5
NONRATT024763.2	187.595	27.3861	347.804	12.7	3.66676	0.0164979	0.655693	Up	0.612341	9.38969	6:2880651:2886435:-	37240427	8
NONRATT024811.2	81.2455	0	162.491	Inf	Inf	0.000565646	0.0691926	Up	0.00325272	3.73754	6:11067701:11080366:-	37269908	3
NONRATT024924.2	21.9089	0	43.8178	Inf	Inf	0.0323865	0.882007	Up	1.0825e-19	1.35677	6:37437657:37438408:-	37327893	1
NONRATT024952.2	87.1792	0	174.358	Inf	Inf	0.000430916	0.059116	Up	7.15598e-10	6.54195	6:50598257:50598968:-	37357321	2
NONRATT025048.2	88.092	175.271	0.912871	0.00520833	-7.58496	0.000873525	0.0986344	Down	7.87499	0.0569254	6:80100166:80107198:-	37416111	4
NONRATT025071.2	1578.81	2963.18	194.442	0.0656192	-3.92974	0.00204648	0.180966	Down	186.822	14.9889	6:91680225:91680524:-	37426180	1
NONRATT025102.2	427.315	778.861	75.7683	0.0972808	-3.3617	0.0125776	0.571599	Down	17.4583	2.06705	6:95387812:95389260:-	37447080	2
NONRATT025145.2	24.1911	0	48.3822	Inf	Inf	0.0257265	0.78675	Up	3.35461e-05	1.70226	6:102076811:102078091:-	37475339	2
NONRATT025222.2	22.8218	0	45.6435	Inf	Inf	0.029532	0.851114	Up	4.64879e-75	2.69782	6:107467941:107468329:+	37042728	1
NONRATT025239.2	25.6517	50.3905	0.912871	0.0181159	-5.7866	0.0405592	0.964829	Down	2.0768	0.0463459	6:110166093:110166555:-	37521167	1
NONRATT025311.2	12803.3	22487.3	3119.28	0.138713	-2.84983	0.0393851	0.959718	Down	230.668	39.1499	6:127993913:127995751:-	37568705	1
NONRATT025364.2	26.1081	1.09545	51.1208	46.6667	5.54432	0.0483098	1	Up	0.0148567	1.15797	6:135576344:135577365:+	37183459	1
NONRATT025523.2	136.839	15.3362	258.342	16.8452	4.07427	0.0134157	0.589673	Up	0.307381	6.15575	7:11309481:11311096:+	37689438	3
NONRATT025573.2	85.0796	161.03	9.12871	0.0566893	-4.14078	0.0214392	0.739551	Down	7.24425	0.517981	7:12314912:12315331:+	37717615	1
NONRATT025580.2	62.0752	0	124.15	Inf	Inf	0.00152363	0.146178	Up	4.06524e-31	11.2413	7:12457871:12458790:+	37720345	2
NONRATT025690.2	23.2782	0	46.5564	Inf	Inf	0.0282017	0.83036	Up	1.86855e-26	1.57722	7:27278547:27279226:+	37791108	1
NONRATT025785.2	67.5524	5.47723	129.628	23.6667	4.56478	0.0198256	0.719257	Up	0.0576165	1.81354	7:53316608:53318261:+	37851146	1
NONRATT025788.2	209.504	0	419.008	Inf	Inf	9.01986e-06	0.00378293	Up	0.00354124	10.2479	7:54006125:54026288:+	37852089	8
NONRATT025792.2	321.331	60.2495	582.412	9.66667	3.27302	0.0185081	0.693313	Up	0.88205	10.394	7:54213331:54236613:+	37856157	14
NONRATT025824.2	19.6267	0	39.2534	Inf	Inf	0.0407517	0.964829	Up	0.00166581	1.35626	7:60713086:60713831:+	37881505	2
NONRATT025884.2	95.2124	189.512	0.912871	0.00481696	-7.69766	0.0006479	0.0773214	Down	8.7185	0.0639015	7:70814414:70815270:+	37914249	4
NONRATT026028.2	42.8136	81.0629	4.56435	0.0563063	-4.15056	0.0498568	1	Down	2.66335	0.170571	7:116389174:116389751:+	37996906	1
NONRATT026052.2	49.8428	99.6855	0	0	#NAME?	0.00238412	0.205861	Down	1.04374	1.54879e-06	7:117417667:117420719:+	38015671	7
NONRATT026221.2	63.9923	1.09545	126.889	115.833	6.85591	0.00385125	0.278485	Up	0.0255651	2.80426	7:130063381:130067566:+	38126871	7
NONRATT026372.2	336.849	21.9089	651.79	29.75	4.89482	0.00108439	0.113698	Up	0.46132	17.2085	7:2529908:2530782:-	38299495	1
NONRATT026382.2	251.131	44.9132	457.348	10.1829	3.34808	0.0201842	0.72236	Up	1.71403	21.2168	7:2823342:2823839:-	38305658	1
NONRATT026407.2	223.471	446.942	0	0	#NAME?	4.08659e-06	0.00228968	Down	19.8188	3.93039e-09	7:3340847:3341953:-	38318871	2
NONRATT026492.2	72.9384	9.85901	136.018	13.7963	3.78621	0.0390985	0.954954	Up	0.308735	5.31965	7:11972667:11982179:-	38364177	6
NONRATT026569.2	60.8885	117.213	4.56435	0.0389408	-4.68257	0.0195152	0.71616	Down	2.45096	0.114004	7:14340635:14353642:-	38421120	5
NONRATT026612.2	20.0832	0	40.1663	Inf	Inf	0.038914	0.95374	Up	1.47122e-05	1.44615	7:23940556:23941198:-	38452252	1
NONRATT026655.2	97.2208	0	194.442	Inf	Inf	0.000280547	0.043349	Up	5.09812e-25	2.86337	7:29959585:29961154:-	38478756	1
NONRATT026658.2	46.4651	92.0174	0.912871	0.00992063	-6.65535	0.00788227	0.431731	Down	6.64542	0.063948	7:30073927:30076161:-	38481147	3
NONRATT026800.2	23.5521	47.1041	0	0	#NAME?	0.0223082	0.747198	Down	1.14489	6.10859e-07	7:64332750:64341149:-	38570986	4
NONRATT026818.2	23.5521	47.1041	0	0	#NAME?	0.0223082	0.747198	Down	0.383578	7.81211e-05	7:70351819:70355576:-	38586783	6
NONRATT026833.2	34.2327	0	68.4653	Inf	Inf	0.0101784	0.506472	Up	8.48434e-20	1.15526	7:70571434:70573256:-	38597924	4
NONRATT026836.2	82.1584	0	164.317	Inf	Inf	0.00054194	0.0668499	Up	1.44331e-11	8.73425	7:70585017:70585572:-	38598867	2
NONRATT026852.2	27.021	1.09545	52.9465	48.3333	5.59495	0.044596	1	Up	0.0386454	1.65702	7:71287434:71290125:-	38607523	2
NONRATT026872.2	71.3865	2.19089	140.582	64.1667	6.00375	0.00514895	0.332958	Up	0.0365911	3.67402	7:75413876:75419012:-	38618466	6
NONRATT026873.2	22.8218	0	45.6435	Inf	Inf	0.029532	0.851114	Up	5.45799e-16	1.21112	7:75414106:75416873:-	38619340	4
NONRATT026924.2	1660.06	202.657	3117.45	15.3829	3.94325	0.00198547	0.178928	Up	2.19501	41.3622	7:91511754:91513493:-	38649770	1
NONRATT026936.2	576.295	112.831	1039.76	9.21521	3.20402	0.0136733	0.593816	Up	1.51522	17.0332	7:95395410:95396818:-	38657164	1
NONRATT026945.2	425.033	850.065	0	0	#NAME?	1.30535e-07	0.000479031	Down	30.6021	4.88988e-12	7:97738957:97743202:-	38662393	2
NONRATT026971.2	23.0043	46.0087	0	0	#NAME?	0.0236306	0.76416	Down	3.57976	9.80535e-33	7:98798472:98802196:-	38678014	3
NONRATT027194.2	24.1911	0	48.3822	Inf	Inf	0.0257265	0.78675	Up	1.26567e-12	1.4062	7:125738577:125739368:-	38813148	1
NONRATT027209.2	16.4317	32.8634	0	0	#NAME?	0.0481315	1	Down	0.984444	0.00968151	7:126687409:126688030:-	38823314	1
NONRATT027217.2	372.451	673.699	71.2039	0.105691	-3.24207	0.0172066	0.666119	Down	16.486	2.13543	7:129950827:129956932:-	38828338	4
NONRATT027286.2	125.976	0	251.952	Inf	Inf	9.57232e-05	0.0200732	Up	0.00122313	8.94871	7:137816789:137856337:-	38869574	8
NONRATT027357.2	65.2703	0	130.541	Inf	Inf	0.00127458	0.129928	Up	2.33429e-22	6.53289	7:143937204:143937664:-	38944569	1
NONRATT027410.2	83.9841	0	167.968	Inf	Inf	0.000497996	0.0638964	Up	1.54556e-19	7.61473	8:11038136:11038646:+	38977585	1
NONRATT027612.2	382.949	684.653	81.2455	0.118667	-3.07501	0.0224046	0.747198	Down	8.25267	1.19931	8:48430962:48432525:+	39110105	1
NONRATT027621.2	142.408	284.816	0	0	#NAME?	3.67836e-05	0.0103129	Down	5.63914	7.65519e-05	8:48658100:48663015:+	39114639	5
NONRATT027624.2	20.0832	0	40.1663	Inf	Inf	0.038914	0.95374	Up	9.62e-18	1.76976	8:48663886:48664534:+	39115902	2
NONRATT027626.2	52.0336	0	104.067	Inf	Inf	0.00277373	0.22128	Up	3.04282e-08	2.28093	8:48721866:48723021:+	39117360	2
NONRATT027810.2	166.416	3.28634	329.546	100.278	6.64786	0.000374296	0.0523266	Up	0.16418	19.2532	8:71514526:71526227:+	39235522	3
NONRATT027847.2	24.0998	48.1996	0	0	#NAME?	0.0210636	0.739551	Down	1.37982	3.25639e-18	8:76904507:76939798:-	39841662	2
NONRATT027849.2	195.811	0	391.622	Inf	Inf	1.25587e-05	0.00460872	Up	3.76241e-07	4.09138	8:76864339:76875889:-	39841003	6
NONRATT027850.2	472.593	24.0998	921.087	38.2197	5.25624	0.000336036	0.0493268	Up	0.694135	32.8533	8:76853139:76861155:-	39838794	5
NONRATT027878.2	293.488	0	586.976	Inf	Inf	1.62462e-06	0.00139627	Up	0.00100469	29.3126	8:81963660:81968607:+	39292212	2
NONRATT027957.2	23.2782	0	46.5564	Inf	Inf	0.0282017	0.83036	Up	1.34362e-13	1.59726	8:103877710:103878935:+	39340282	2
NONRATT028050.2	20.2657	40.5315	0	0	#NAME?	0.0314985	0.874038	Down	1.46429	6.24443e-08	8:117589914:117590863:+	39396323	2
NONRATT028102.2	48.7473	97.4946	0	0	#NAME?	0.00256716	0.211704	Down	1.23476	5.54469e-11	8:119529894:119531389:+	39423773	1
NONRATT028149.2	2140.5	3788.05	492.95	0.130133	-2.94194	0.0159542	0.642525	Down	219.06	34.8736	8:128027551:128028307:+	39451234	3
NONRATT028168.2	229.496	53.6768	405.315	7.55102	2.91667	0.0416629	0.977648	Up	1.33731	12.4633	8:128807127:128808756:+	39464290	2
NONRATT028317.2	64.0835	128.167	0	0	#NAME?	0.000988037	0.105864	Down	6.21092	6.52469e-10	8:22125468:22125932:-	39560029	2
NONRATT028328.2	57.5109	0	115.022	Inf	Inf	0.00198608	0.178928	Up	3.17102e-13	9.49195	8:22391998:22392395:-	39567083	2
NONRATT028358.2	579.125	26.2907	1131.96	43.0556	5.42813	0.00017768	0.0318068	Up	0.234675	12.5729	8:23336438:23339366:-	39584875	2
NONRATT028553.2	25.743	51.4859	0	0	#NAME?	0.0177642	0.682621	Down	0.589304	1.10207e-06	8:55308760:55310390:-	39712250	1
NONRATT028572.2	21.4525	0	42.9049	Inf	Inf	0.0339113	0.891533	Up	0.000173866	1.22431	8:58167406:58168982:-	39727533	2
NONRATT028574.2	17.5271	35.0542	0	0	#NAME?	0.0423353	0.977648	Down	2.80489	9.62444e-31	8:58213280:58213516:-	39729337	1
NONRATT028578.2	55.8677	111.735	0	0	#NAME?	0.00161643	0.153082	Down	1.27767	0	8:58932576:58935355:-	39733733	2
NONRATT028662.2	65.818	6.57267	125.063	19.0278	4.25004	0.027811	0.83036	Up	0.17997	4.22388	8:66870070:66874776:-	39773034	4
NONRATT028701.2	43.1788	3.28634	83.0713	25.2778	4.6598	0.035148	0.912126	Up	0.0955525	2.80704	8:71266168:71266853:-	39806965	1
NONRATT028723.2	340.501	0	681.002	Inf	Inf	7.42042e-07	0.000990222	Up	0.000711041	18.1935	8:79402634:79406745:+	39273464	3
NONRATT028740.2	30.0335	59.154	0.912871	0.0154321	-6.01792	0.0274276	0.821652	Down	1.21397	0.0266249	8:77016901:77020339:+	39260365	4
NONRATT028758.2	191.703	345.065	38.3406	0.111111	-3.16993	0.0327315	0.884836	Down	9.31405	1.25643	8:72824989:72836162:-	39822061	4
NONRATT028800.2	45.1871	87.6356	2.73861	0.03125	-5	0.0236557	0.76416	Down	1.90213	0.0682756	8:85388352:85391416:-	39870718	2
NONRATT028819.2	132.184	8.76356	255.604	29.1667	4.86625	0.00506258	0.328822	Up	0.25254	8.98916	8:90628202:90630621:-	39886716	3
NONRATT028833.2	186.773	373.547	0	0	#NAME?	1.00699e-05	0.00396908	Down	4.81491	1.58371e-07	8:93323802:93349109:-	39900917	7
NONRATT028893.2	27.3861	0	54.7723	Inf	Inf	0.0187982	0.693313	Up	2.53184e-29	2.3379	8:104841901:104912539:-	39943625	2
NONRATT028908.2	34.5065	69.013	0	0	#NAME?	0.00775657	0.429656	Down	0.896952	2.67494e-15	8:109482587:109484035:-	39957635	1
NONRATT028916.2	27.3861	54.7723	0	0	#NAME?	0.0150454	0.623876	Down	3.72332	5.93322e-18	8:111106614:111107247:-	39963772	2
NONRATT028936.2	61.8014	7.66812	115.935	15.119	3.9183	0.0413957	0.973794	Up	0.275757	5.39108	8:114225942:114226439:-	39971687	1
NONRATT028996.2	17.5271	35.0542	0	0	#NAME?	0.0423353	0.977648	Down	0.900338	2.33757e-16	8:117388904:117392931:-	40009586	5
NONRATT029217.2	102.972	205.944	0	0	#NAME?	0.000152836	0.029913	Down	2.90746	4.82571e-06	9:17350275:17354890:+	40143058	3
NONRATT029246.2	33.4111	66.8222	0	0	#NAME?	0.00855029	0.454745	Down	2.59127	1.53276e-26	9:19448468:19451916:+	40160946	2
NONRATT029259.2	198.823	19.718	377.929	19.1667	4.26053	0.00640186	0.380457	Up	0.369464	8.72567	9:23352246:23368776:+	40172886	7
NONRATT029305.2	26.8384	53.6768	0	0	#NAME?	0.0158929	0.642525	Down	1.76801	1.96381e-05	9:40922306:40922881:+	40199369	1
NONRATT029356.2	45.6435	0	91.2871	Inf	Inf	0.00422246	0.29515	Up	9.03113e-30	5.75944	9:51129723:51130088:+	40226786	1
NONRATT029454.2	21.3612	42.7224	0	0	#NAME?	0.0280888	0.83036	Down	0.84396	2.59623e-14	9:69611126:69612091:+	40292839	1
NONRATT029469.2	48.8386	0	97.6772	Inf	Inf	0.00340548	0.256354	Up	2.07075e-18	1.79657	9:71304467:71313454:-	40691714	5
NONRATT029487.2	292.119	0	584.237	Inf	Inf	1.66479e-06	0.00139627	Up	3.12523e-27	39.6719	9:80002930:80003613:+	40327403	2
NONRATT029497.2	44.9132	89.8265	0	0	#NAME?	0.00335995	0.256354	Down	3.23489	8.09949e-10	9:81518251:81533017:+	40333074	4
NONRATT029618.2	133.553	19.718	247.388	12.5463	3.64919	0.0241	0.77241	Up	0.364331	5.4868	9:93545476:93549442:+	40397054	5
NONRATT029683.2	25.5604	0	51.1208	Inf	Inf	0.022448	0.747198	Up	6.33541e-16	1.78442	9:100552600:100553261:+	40438545	1
NONRATT029704.2	21.4525	0	42.9049	Inf	Inf	0.0339113	0.891533	Up	1.00656e-15	0.670003	9:111220888:111249612:+	40449707	6
NONRATT029722.2	50.6643	0	101.329	Inf	Inf	0.00302544	0.232515	Up	3.77324e-10	7.1426	9:113936537:113936864:+	40456647	1
NONRATT029727.2	32.8634	0	65.7267	Inf	Inf	0.0114513	0.540492	Up	4.92889e-44	5.78523	9:114615614:114615875:+	40458905	1
NONRATT029839.2	44.0917	3.28634	84.897	25.8333	4.69116	0.0332968	0.889409	Up	0.013343	0.37259	9:19121670:19158951:-	40527433	4
NONRATT029848.2	1854.31	534.577	3174.05	5.9375	2.56986	0.032534	0.882748	Up	4.60895	33.4875	9:23323934:23337536:-	40532518	7
NONRATT029849.2	101.785	0	203.57	Inf	Inf	0.000233477	0.038508	Up	2.39353e-15	17.7425	9:23345572:23348226:-	40532783	2
NONRATT029909.2	251.496	0	502.992	Inf	Inf	3.60638e-06	0.00211752	Up	6.73006e-13	23.832	9:42780284:42789022:-	40570295	3
NONRATT030003.2	25.104	0	50.2079	Inf	Inf	0.0234857	0.76416	Up	1.335e-07	1.91176	9:56113565:56114173:-	40627470	1
NONRATT030027.2	1054.82	0	2109.64	Inf	Inf	1.97457e-09	1.44924e-05	Up	5.66381e-06	81.5442	9:61681284:61683268:-	40646154	3
NONRATT030132.2	110.366	4.38178	216.35	49.375	5.62571	0.00290838	0.22703	Up	0.0734971	4.92993	9:78295054:78296068:-	40708677	1
NONRATT030140.2	555.938	0	1111.88	Inf	Inf	5.23213e-08	0.000256008	Up	8.78886e-13	30.6847	9:79490065:79490901:-	40712472	1
NONRATT030208.2	24.6475	0	49.295	Inf	Inf	0.0245779	0.775868	Up	9.71795e-19	0.806088	9:85386754:85388161:-	40772292	1
NONRATT030247.2	385.232	0	770.463	Inf	Inf	3.8328e-07	0.000932435	Up	0	21.6528	9:93371671:93374520:-	40796378	6
NONRATT030253.2	38.3406	0	76.6812	Inf	Inf	0.00725592	0.409652	Up	3.11215e-10	0.973212	9:94569286:94579807:-	40801624	9
NONRATT030263.2	19.1703	0	38.3406	Inf	Inf	0.0426918	0.977648	Up	5.9642e-11	1.13836	9:95350720:95352856:-	40807369	2
NONRATT030291.2	24.6475	49.295	0	0	#NAME?	0.0198936	0.719257	Down	1.1652	3.40501e-23	9:98550638:98551429:-	40821802	1
NONRATT030312.2	43.9091	83.2538	4.56435	0.0548246	-4.18903	0.0468135	1	Down	1.73153	0.11999	9:100767553:100770146:-	40838433	3
NONRATT030317.2	49.0212	2.19089	95.8514	43.75	5.45121	0.0162697	0.650743	Up	0.060294	3.14872	9:100921568:100922269:-	40841196	1
NONRATT030354.2	113.835	226.757	0.912871	0.00402576	-7.95652	0.000317985	0.0479778	Down	5.42348	0.0267017	9:113300831:113301619:-	40871052	1
NONRATT030406.2	94.4821	0	188.964	Inf	Inf	0.000314232	0.0479778	Up	1.28446e-05	9.04281	X:1314696:1316683:+	40904136	2
NONRATT030417.2	42.4485	0	84.897	Inf	Inf	0.00529985	0.339593	Up	5.33067e-32	5.59945	X:6408720:6475332:+	40910095	4
NONRATT030473.2	18.6226	37.2451	0	0	#NAME?	0.0375008	0.936181	Down	1.31859	0	X:20484543:20485072:+	40944951	1
NONRATT030524.2	56.598	0	113.196	Inf	Inf	0.00209702	0.183227	Up	1.35361e-12	2.27369	X:40307897:40309047:+	40987601	1
NONRATT030592.2	72.5732	10.9545	134.192	12.25	3.61471	0.0469657	1	Up	0.567971	8.4152	X:71540963:71544044:+	41020571	2
NONRATT030749.2	27.3861	0	54.7723	Inf	Inf	0.0187982	0.693313	Up	0.000223374	1.84279	X:122683244:122690462:+	41107417	3
NONRATT030828.2	22.8218	0	45.6435	Inf	Inf	0.029532	0.851114	Up	7.53772e-13	0.567822	X:159170676:159172528:+	41172200	1
NONRATT030845.2	28.299	0	56.598	Inf	Inf	0.017244	0.666119	Up	0	5.45977	X:2069240:2069824:-	41180911	2
NONRATT030937.2	24.1911	0	48.3822	Inf	Inf	0.0257265	0.78675	Up	0	4.90259	X:23144183:23145253:-	41235966	2
NONRATT031104.2	18.0748	36.1497	0	0	#NAME?	0.0398166	0.959718	Down	1.63245	1.11086e-21	X:79840446:79845352:-	41340710	4
NONRATT031136.2	153.819	0	307.638	Inf	Inf	3.93087e-05	0.0106854	Up	4.04633e-10	8.8773	X:104720415:104724493:-	41356008	5
NONRATT031226.2	16.9794	33.9588	0	0	#NAME?	0.045093	1	Down	1.15833	0	7:141355712:141356266:-	38914641	1
NONRATT031233.2	35.602	0	71.2039	Inf	Inf	0.00906914	0.47041	Up	5.17607e-20	2.26659	X:116751229:116751951:-	41396043	1
NONRATT031248.2	20.2657	40.5315	0	0	#NAME?	0.0314985	0.874038	Down	1.67479	1.03974e-22	X:121608450:121734949:-	41406270	5
NONRATT031268.2	17.801	0	35.602	Inf	Inf	0.049269	1	Up	2.50353e-05	0.460627	X:123713328:123723234:-	41418591	6
NONRATT031314.2	18.6226	37.2451	0	0	#NAME?	0.0375008	0.936181	Down	1.1071	3.64544e-15	X:143343133:143363452:-	41445877	7
NONRATT031382.1	51.5772	0	103.154	Inf	Inf	0.00285473	0.224089	Up	0.000344484	2.25759	1:88264314:88267181:+	41514494	3
NONRATT031410.1	102.789	1.09545	204.483	186.667	7.54432	0.000699257	0.0822712	Up	0.0589889	12.7955	1:141675043:141679522:+	41534254	2
NONRATT031812.1	24.1911	0	48.3822	Inf	Inf	0.0257265	0.78675	Up	2.84474e-15	0.454925	12:22366553:22372040:+	41917966	5
NONRATT031935.1	18.7139	0	37.4277	Inf	Inf	0.0447474	1	Up	6.9468e-19	2.88359	13:88077394:88130800:-	42006893	2
NONRATT031959.1	83.9841	0	167.968	Inf	Inf	0.000497996	0.0638964	Up	0.00554428	9.90207	14:24182754:24188263:+	42026969	2
NONRATT032185.1	89.5526	165.412	13.6931	0.0827815	-3.59455	0.037692	0.939357	Down	1.529	0.156472	16:49163528:49167325:+	42215773	2
NONRATT032725.1	178.923	32.8634	324.982	9.88889	3.30581	0.0289968	0.851114	Up	2.12604	25.674	2:142079272:142084877:-	42625673	2
NONRATT032802.1	34.5065	69.013	0	0	#NAME?	0.00775657	0.429656	Down	3.428	0.0182894	20:45681158:45684630:+	42679864	3
NONRATT033206.1	19.6267	0	39.2534	Inf	Inf	0.0407517	0.964829	Up	0	2.50516	5:133799174:133802097:+	42988492	2
NONRATT033405.1	198.184	17.5271	378.841	21.6146	4.43393	0.00496291	0.32378	Up	0.248073	6.56401	6:114759473:114966751:-	43139544	4
NONRATT033407.1	467.299	92.0174	842.58	9.15675	3.19484	0.0159767	0.642525	Up	0.525366	5.87738	6:114760439:115141057:-	43143919	23
NONRATT033548.1	24.1911	0	48.3822	Inf	Inf	0.0257265	0.78675	Up	3.19769e-21	2.43086	7:83989467:83991369:-	43241932	2
TCONS_00000036	18.2574	0	36.5148	Inf	Inf	0.0469338	1	Up	0.0176211	2.02492	1:11962868:12009248:+	412	2	XLOC_000022	ENSRNOT00000074325	o
TCONS_00000040	475.423	101.876	848.97	8.33333	3.05889	0.0200814	0.72236	Up	4.76996	48.6118	1:11962889:12009248:+	403	2	XLOC_000022	ENSRNOT00000074325	o
TCONS_00000188	82.98	9.85901	156.101	15.8333	3.98489	0.027276	0.818783	Up	0.325663	6.48972	1:47952158:47967635:+	555	2	XLOC_000092	ENSRNOT00000025936	o
TCONS_00000309	22.3653	0	44.7307	Inf	Inf	0.0309265	0.865799	Up	7.65845e-10	1.76174	1:72717405:72784058:+	580	2	XLOC_000155	ENSRNOT00000024400	o
TCONS_00000865	12825.7	1093.25	24558.1	22.4633	4.4895	0.0024997	0.209406	Up	100.53	2763.86	1:174684257:174725564:+	205	2	XLOC_000468	ENSRNOT00000014002	o
TCONS_00001351	32824	4906.5	60741.5	12.3798	3.62992	0.0299609	0.855634	Up	444.784	6737.56	1:243232330:243283680:+	208	2	XLOC_000732	ENSRNOT00000021496	o
TCONS_00001356	45597.9	6797.24	84398.6	12.4166	3.6342	0.0435685	0.991537	Up	628.219	9545.2	1:243240137:243283679:+	204	2	XLOC_000732	ENSRNOT00000021496	o
TCONS_00001421	100.872	0	201.744	Inf	Inf	0.000242104	0.0386288	Up	4.66198e-05	4.04868	1:252880956:252900728:+	1148	2	XLOC_000755	ENSRNOT00000054757	o
TCONS_00001655	4558.51	7707.55	1409.47	0.182869	-2.45112	0.0466603	1	Down	251.857	56.365	1:11869420:11907668:-	577	3	XLOC_000880	ENSRNOT00000089608	x
TCONS_00002163	71.6604	0	143.321	Inf	Inf	0.000907103	0.100874	Up	3.38964e-10	3.62718	1:90200872:90251548:-	909	2	XLOC_001123	ENSRNOT00000030186	o
TCONS_00003239	399.746	113.926	685.566	6.01763	2.58919	0.0489411	1	Up	9.9866	73.5579	1:243234877:243283683:-	215	2	XLOC_001627	ENSRNOT00000021496	x
TCONS_00003242	260.625	38.3406	482.909	12.5952	3.65481	0.012006	0.557591	Up	3.37968	52.3075	1:243240134:243283687:-	213	2	XLOC_001627	ENSRNOT00000021496	x
TCONS_00003427	36.9713	0	73.9425	Inf	Inf	0.00810134	0.438818	Up	2.97446e-20	4.34816	1:276925812:276957115:-	392	4	XLOC_001717		u
TCONS_00004581	976.954	100.781	1853.13	18.3877	4.20067	0.00134852	0.136516	Up	8.4971	191.704	10:12877195:12882225:-	223	2	XLOC_002319		u
TCONS_00004684	232.782	0	465.564	Inf	Inf	5.33617e-06	0.00268627	Up	5.66501e-25	50.0012	10:16453262:16541200:-	215	2	XLOC_002372		u
TCONS_00004750	73.5774	6.57267	140.582	21.3889	4.41879	0.0202255	0.72236	Up	0.143884	3.92678	10:34266770:34268627:-	825	2	XLOC_002406		u
TCONS_00005654	42.7224	3.28634	82.1584	25	4.64386	0.0361229	0.922355	Up	0.278731	8.50034	11:24191133:24191704:+	222	2	XLOC_002874	ENSRNOT00000074032	x
TCONS_00006154	1066.69	27.3861	2105.99	76.9	6.26491	1.45491e-05	0.00496665	Up	0.231903	21.8752	11:61458195:61511259:-	2221	3	XLOC_003144	ENSRNOT00000046208	o
TCONS_00006156	131.819	20.8135	242.824	11.6667	3.54432	0.0279904	0.83036	Up	0.110267	1.56825	11:61462619:61511252:-	3577	2	XLOC_003144	ENSRNOT00000046208	o
TCONS_00006169	229.131	27.3861	430.875	15.7333	3.97575	0.00830254	0.446421	Up	2.39799	46.4734	11:64167597:64259788:-	214	3	XLOC_003148		u
TCONS_00006488	47.9257	5.47723	90.3742	16.5	4.04439	0.0497466	1	Up	0.120429	2.2986	12:6978236:6984189:+	908	2	XLOC_003270		u
TCONS_00006542	1887.82	290.293	3485.34	12.0063	3.58572	0.00424757	0.295498	Up	25.9017	381.146	12:10291883:10327008:+	211	3	XLOC_003282	ENSRNOT00000092627	x
TCONS_00006547	2921.83	818.298	5025.35	6.14123	2.61853	0.0309656	0.865799	Up	75.2914	565.602	12:10323921:10368635:+	205	2	XLOC_003282	ENSRNOT00000071567	x
TCONS_00007640	54.681	4.38178	104.98	23.9583	4.58246	0.0265652	0.799079	Up	0.394232	11.3117	13:83890101:83984668:+	215	3	XLOC_003829	ENSRNOT00000004394	o
TCONS_00007895	507.1	115.022	899.178	7.81746	2.9667	0.0226954	0.753722	Up	9.72992	93.0022	13:42839271:42966861:-	223	3	XLOC_003952	ENSRNOT00000038020	o
TCONS_00007901	261.081	49.295	472.867	9.59259	3.26192	0.0223378	0.747198	Up	4.46878	52.2102	13:42926761:42966884:-	209	2	XLOC_003952		u
TCONS_00007902	279.886	44.9132	514.859	11.4634	3.51896	0.0139514	0.599399	Up	4.09697	56.8209	13:42936224:42966884:-	209	2	XLOC_003952		u
TCONS_00008526	8283.12	1513.91	15052.3	9.94272	3.31364	0.0133911	0.589673	Up	34.7315	422.491	14:46522163:46648314:+	822	2	XLOC_004267	ENSRNOT00000088111	o
TCONS_00008544	54.1332	101.876	6.3901	0.062724	-3.99484	0.0431725	0.984051	Down	4.25896	0.30541	14:46630371:46658598:+	450	3	XLOC_004270	ENSRNOT00000085875	o
TCONS_00008545	91.7435	0	183.487	Inf	Inf	0.000352908	0.0507875	Up	3.55684e-05	9.14699	14:46633703:46656266:+	462	2	XLOC_004267	ENSRNOT00000085875	o
TCONS_00009526	37.1538	2.19089	72.1168	32.9167	5.04075	0.0344286	0.900851	Up	0.233709	8.10402	15:51275982:51303712:+	205	2	XLOC_004754		u
TCONS_00009726	25.5604	0	51.1208	Inf	Inf	0.022448	0.747198	Up	0.00717049	2.12672	15:18850194:18851875:-	555	2	XLOC_004859	ENSRNOT00000088264	i
TCONS_00010334	224.475	42.7224	406.228	9.50855	3.24922	0.0258599	0.789184	Up	1.05699	12.3125	16:50071478:50107854:+	762	2	XLOC_005154	ENSRNOT00000034448	o
TCONS_00010418	5163.56	1603.73	8723.39	5.43944	2.44346	0.0491824	1	Up	77.1259	513.438	16:71439113:71439681:+	392	2	XLOC_005197		u
TCONS_00010561	3954.83	414.078	7495.58	18.1019	4.17807	0.00147976	0.144334	Up	34.2602	758.514	16:8288688:8338116:-	228	2	XLOC_005275	ENSRNOT00000026932	o
TCONS_00011446	90.4655	165.412	15.5188	0.093819	-3.41398	0.0459376	1	Down	1.48066	0.168355	17:13080020:13089985:-	2110	3	XLOC_005706		u
TCONS_00011690	179.744	9.85901	349.63	35.463	5.14824	0.00206295	0.18133	Up	0.678054	30.8998	17:45530414:45596110:-	261	2	XLOC_005809		u
TCONS_00012299	374.734	0	749.467	Inf	Inf	4.44652e-07	0.000932435	Up	3.24174e-10	75.4946	18:84589303:84625351:+	229	2	XLOC_006080		u
TCONS_00012596	51.1208	0	102.242	Inf	Inf	0.00293859	0.22703	Up	5.15589e-05	1.77859	18:60619920:60626958:-	1327	4	XLOC_006231	ENSRNOT00000023890	i
TCONS_00013250	379.754	93.1128	666.396	7.15686	2.83933	0.0335873	0.891533	Up	7.93711	69.8482	19:29169165:29188664:-	220	2	XLOC_006555		u
TCONS_00013251	482.726	118.308	847.144	7.16049	2.84006	0.0291101	0.851114	Up	9.92938	86.8907	19:29173837:29214116:-	225	3	XLOC_006555		u
TCONS_00013252	188.051	32.8634	343.239	10.4444	3.38466	0.0247724	0.778536	Up	2.78687	36.1908	19:29173932:29188664:-	219	2	XLOC_006555		u
TCONS_00013253	249.122	53.6768	444.568	8.28231	3.05003	0.0321449	0.882007	Up	4.55844	45.9759	19:29173932:29188664:-	223	2	XLOC_006555		u
TCONS_00013846	136.292	8.76356	263.82	30.1042	4.91189	0.00454514	0.307457	Up	0.727692	27.8357	2:140414854:140416059:+	219	2	XLOC_006873		u
TCONS_00014061	128.715	240.998	16.4317	0.0681818	-3.87447	0.0182155	0.687458	Down	7.95019	0.669515	2:194993483:194994154:+	572	2	XLOC_006986		u
TCONS_00014063	58.0586	116.117	0	0	#NAME?	0.00141225	0.14007	Down	1.67131	0	2:195005166:195007038:+	1311	2	XLOC_006987		u
TCONS_00014341	82.6148	164.317	0.912871	0.00555556	-7.49185	0.00111338	0.11591	Down	2.48856	0.0116401	2:241060601:241092582:+	1244	2	XLOC_007124	ENSRNOT00000033413	o
TCONS_00015015	648.412	178.558	1118.27	6.26278	2.6468	0.0351729	0.912126	Up	15.8193	121.138	2:196378546:196386238:-	213	2	XLOC_007475		u
TCONS_00015518	82.6148	0	165.23	Inf	Inf	0.000530533	0.0659974	Up	7.92784e-31	19.0041	20:3624345:3769329:+	201	3	XLOC_007674	ENSRNOT00000086065	o
TCONS_00018197	585.881	90.9219	1080.84	11.8876	3.57138	0.00677929	0.393333	Up	1.66211	24.2501	3:150899569:150907177:-	1028	2	XLOC_008961		u
TCONS_00018474	1059.39	153.362	1965.41	12.8155	3.67982	0.00387977	0.279172	Up	13.9868	219.092	4:23548440:23776309:+	207	3	XLOC_009113	ENSRNOT00000011359	x
TCONS_00018475	629.607	95.3037	1163.91	12.2126	3.6103	0.00596696	0.36344	Up	8.31423	124.87	4:23548442:23637196:+	215	3	XLOC_009113		u
TCONS_00018476	627.507	146.79	1108.23	7.54975	2.91643	0.0220549	0.747198	Up	12.9574	119.471	4:23548442:23637196:+	214	3	XLOC_009113		u
TCONS_00018478	673.425	199.371	1147.48	5.75549	2.52494	0.0428633	0.978523	Up	18.2191	128.551	4:23548442:23671353:+	206	3	XLOC_009113		u
TCONS_00018479	700.446	101.876	1299.02	12.7509	3.67253	0.00490585	0.322928	Up	9.33476	146.213	4:23548442:23677252:+	205	3	XLOC_009113		u
TCONS_00018995	21.9089	0	43.8178	Inf	Inf	0.0323865	0.882007	Up	0	4.13827	4:150153639:150185597:+	242	2	XLOC_009381	ENSRNOT00000019778	x
TCONS_00019172	68.374	130.358	6.3901	0.0490196	-4.3505	0.022808	0.755754	Down	1.29126	0.0763898	4:169179877:169181966:+	1908	2	XLOC_009438	ENSRNOT00000011580	o
TCONS_00020178	91.1958	15.3362	167.055	10.8929	3.44531	0.0450082	1	Up	0.648506	8.56165	5:10706847:10718031:+	449	3	XLOC_009902		u
TCONS_00021170	37.7929	75.5857	0	0	#NAME?	0.00585009	0.359303	Down	2.39229	8.09256e-08	5:50119899:50139403:-	595	2	XLOC_010395	ENSRNOT00000081150	o
TCONS_00021565	248.94	29.577	468.303	15.8333	3.98489	0.00743532	0.416576	Up	0.43201	8.50347	5:129360236:129361957:-	1270	2	XLOC_010552		u
TCONS_00022195	718.521	198.276	1238.77	6.2477	2.64332	0.033951	0.891533	Up	2.86942	21.9839	6:30627988:30630730:+	1300	2	XLOC_010843		u
TCONS_00022196	352.642	90.9219	614.362	6.75703	2.75639	0.0401771	0.963659	Up	1.33013	11.0577	6:30627988:30630730:+	1282	2	XLOC_010843		u
TCONS_00022268	30.5812	0	61.1624	Inf	Inf	0.014006	0.599399	Up	0.0115999	1.76078	6:44377004:44380910:+	798	3	XLOC_010873		u
TCONS_00022828	319.048	10.9545	627.142	57.25	5.8392	0.000242034	0.0386288	Up	0.997155	67.3326	6:24640748:24642161:-	215	2	XLOC_011156	ENSRNOT00000047853	i
TCONS_00022829	258.799	5.47723	512.121	93.5	6.54689	0.000134539	0.0266879	Up	0.498673	55.2158	6:24640748:24642161:-	214	2	XLOC_011156	ENSRNOT00000047853	i
TCONS_00022830	155.644	10.9545	300.335	27.4167	4.77698	0.00437282	0.299947	Up	0.997756	32.6875	6:24640748:24642161:-	212	2	XLOC_011156	ENSRNOT00000047853	i
TCONS_00023087	399.107	763.525	34.6891	0.0454328	-4.46012	0.00182227	0.169298	Down	30.8187	1.72854	6:95384146:95465919:-	467	2	XLOC_011289	ENSRNOT00000074990	o
TCONS_00023101	115.752	8.76356	222.741	25.4167	4.6677	0.00796382	0.432966	Up	0.0664319	2.04077	6:96439050:96491709:-	2518	2	XLOC_011293	ENSRNOT00000010923	o
TCONS_00023956	72.0255	141.312	2.73861	0.0193798	-5.6893	0.00583459	0.359303	Down	2.37916	0.0487999	7:123436281:123438607:+	1124	2	XLOC_011747	ENSRNOT00000082603	o
TCONS_00025858	36.5148	0	73.0297	Inf	Inf	0.00840946	0.45052	Up	0	6.6486	8:122561912:122596894:+	254	2	XLOC_012652	ENSRNOT00000047198	x
TCONS_00026299	92.6564	16.4317	168.881	10.2778	3.36146	0.0487892	1	Up	1.17661	14.854	8:69088890:69107146:-	262	3	XLOC_012868	ENSRNOT00000012404	o

## Sheet: 30h vs 0h
id	baseMean	baseMean_control_0h	baseMean_case_30h	foldChange	log2FoldChange	pval	padj	up_down	expression_0h	expression_30h	locus	length	exon_count	gene_id	nearest_ref	class_code
NONRATT000150.2	32.6169	0	65.2338	Inf	Inf	0.00290853	0.263963	Up	6.80415e-25	3.75495	1:40998635:41004788:+	21571329	5
NONRATT000503.2	26.9032	53.8064	0	0	#NAME?	0.00622647	0.405499	Down	1.50253	0	1:83968056:83969017:+	21763289	2
NONRATT000544.2	39.6421	0	79.2842	Inf	Inf	0.00122252	0.152188	Up	1.4e-10	2.89847	1:85448890:85455829:+	21784028	9
NONRATT000751.2	17.563	0	35.1259	Inf	Inf	0.0237761	0.829923	Up	2.59463e-09	2.34149	1:114258761:114290654:+	21904381	3
NONRATT000870.2	25.4158	48.8244	2.00719	0.0411105	-4.60435	0.0375529	1	Down	2.48969	0.157076	1:144070744:144169174:+	21977975	4
NONRATT000919.2	24.9104	49.8208	0	0	#NAME?	0.00814365	0.460119	Down	1.68299	2.274e-19	X:157125774:157126391:+	41168509	1
NONRATT001051.2	30.1079	0	60.2158	Inf	Inf	0.00402295	0.312657	Up	4.2625e-14	2.11907	1:167089887:167090679:+	22071917	1
NONRATT001129.2	15.054	0	30.1079	Inf	Inf	0.0353531	0.988802	Up	6.43697e-06	1.60231	1:185329164:185331332:+	22124983	4
NONRATT001174.2	22.0791	0	44.1583	Inf	Inf	0.0119656	0.562942	Up	1.83849e-23	3.18519	1:193114028:193121099:+	22158981	2
NONRATT001240.2	24.9176	47.8279	2.00719	0.041967	-4.5746	0.039749	1	Down	1.92467	0.123792	1:199294670:199295188:+	22193672	1
NONRATT001405.2	14.448	28.8961	0	0	#NAME?	0.0393298	1	Down	0.712243	0.0109361	1:219346506:219347703:+	22286483	2
NONRATT001466.2	108.858	8.96774	208.748	23.2777	4.54088	0.000802362	0.107372	Up	0.267717	8.3048	1:221454187:221454882:+	22324065	1
NONRATT001526.2	21.9211	43.8423	0	0	#NAME?	0.0123692	0.566766	Down	1.08699	1.54811e-06	1:225210579:225211421:+	22361874	1
NONRATT001549.2	69.2509	138.502	0	0	#NAME?	5.21816e-05	0.0120334	Down	1.52142	6.93177e-05	1:226588138:226596131:+	22376141	2
NONRATT001641.2	13.4516	26.9032	0	0	#NAME?	0.046296	1	Down	1.44569	7.5344e-24	1:244775919:244779588:+	22435883	3
NONRATT001691.2	25.5846	1.99283	49.1763	24.6766	4.62507	0.0364301	1	Up	0.0414697	1.372	1:255066993:255086235:+	22480058	4
NONRATT001713.2	9865.41	19620.4	110.396	0.00562657	-7.47353	6.47915e-10	1.88739e-06	Down	743.497	5.58117	1:258002993:258004282:+	22490035	2
NONRATT001714.2	114.151	211.24	17.0612	0.0807666	-3.6301	0.00413449	0.31956	Down	17.2058	1.8671	1:258002996:258004034:+	22490289	2
NONRATT001717.2	365.786	6.97491	724.597	103.886	6.69886	2.06848e-08	1.81858e-05	Up	0.157138	22.5102	1:258234313:258252793:+	22492211	4
NONRATT001718.2	84.2438	155.441	13.0468	0.083934	-3.5746	0.00907287	0.488996	Down	13.0969	1.50158	1:258271484:258271730:+	22492457	1
NONRATT001822.2	68.2868	127.541	9.03238	0.0708193	-3.81971	0.00997988	0.508052	Down	11.1704	1.09254	1:266476428:266477166:+	22565433	2
NONRATT001824.2	16.4409	32.8817	0	0	#NAME?	0.0286053	0.888281	Down	2.90991	3.2136e-18	1:266483363:266484337:+	22566602	2
NONRATT001854.2	14.5522	0	29.1043	Inf	Inf	0.0383545	1	Up	5.2488e-17	1.88929	1:273144251:273144672:+	22589551	1
NONRATT001976.2	21.4229	42.8459	0	0	#NAME?	0.0133006	0.589916	Down	1.46818	1.84886e-07	1:13384155:13384758:-	22664590	1
NONRATT002071.2	21.5738	0.996416	42.1511	42.3027	5.40268	0.0328687	0.960046	Up	0.00698332	0.775651	1:37802591:37819294:-	22734490	4
NONRATT002073.2	18.5666	0	37.1331	Inf	Inf	0.0203229	0.754307	Up	3.88015e-16	3.00282	1:37811143:37863769:-	22735893	4
NONRATT002381.2	119.819	30.8889	208.748	6.75804	2.7566	0.021041	0.76879	Up	0.444824	3.94727	1:81179588:81181048:-	22920861	1
NONRATT002477.2	46.6673	0	93.3346	Inf	Inf	0.000543861	0.078871	Up	3.37808e-07	3.5272	1:87201052:87221844:-	22972933	5
NONRATT002548.2	26.405	52.81	0	0	#NAME?	0.00665598	0.419864	Down	1.16024	9.37524e-07	1:90149379:90150317:-	23011900	1
NONRATT002687.2	18205.3	393.584	36017.1	91.5106	6.51587	3.98069e-07	0.000207394	Up	20.6608	2521.56	1:102786004:102788504:-	23084912	3
NONRATT002841.2	93.7394	26.9032	160.576	5.96864	2.5774	0.0410807	1	Up	0.191961	1.50692	1:143702442:143723741:-	23183496	5
NONRATT002862.2	37.3799	70.7455	4.01439	0.0567441	-4.13939	0.0256712	0.856064	Down	2.0757	0.16477	1:146748695:146823762:-	23198362	6
NONRATT002896.2	19.9283	39.8566	0	0	#NAME?	0.0166356	0.674387	Down	0.549946	0.000196124	X:157073859:157081220:-	41465138	4
NONRATT002900.2	40.6313	3.98566	77.277	19.3887	4.27715	0.0187054	0.722585	Up	0.11118	2.79946	X:157319039:157323878:-	41468697	3
NONRATT002911.2	43.8423	87.6846	0	0	#NAME?	0.000760852	0.102913	Down	3.72297	0.00484675	1:151494211:151494924:-	23203908	2
NONRATT002916.2	331.27	534.079	128.46	0.240527	-2.05573	0.0292742	0.902544	Down	20.7326	6.65153	1:153861210:153861851:-	23206317	2
NONRATT002938.2	274.197	497.211	51.1835	0.102941	-3.28011	0.00139461	0.164857	Down	14.8109	2.03008	1:162381402:162385571:-	23221027	2
NONRATT003289.2	848.932	30.8889	1666.98	53.9668	5.754	1.7229e-08	1.61574e-05	Up	0.225608	16.3957	1:207993894:208000105:-	23453079	3
NONRATT003292.2	639.682	30.8889	1248.48	40.4183	5.33694	1.68497e-07	0.000112869	Up	0.545446	29.1879	1:208000146:208001329:-	23455822	1
NONRATT003294.2	134.482	0	268.964	Inf	Inf	3.32464e-07	0.000187071	Up	3.00346e-24	13.3507	1:208004491:208005049:-	23456725	1
NONRATT003438.2	282.399	449.383	115.414	0.256827	-1.96113	0.0421447	1	Down	24.2313	8.30987	1:219967306:219973958:-	23535887	2
NONRATT003515.2	25.0899	0	50.1799	Inf	Inf	0.00785936	0.45685	Up	6.16117e-18	3.44185	1:222232350:222233696:-	23572623	4
NONRATT003557.2	81.7573	9.96416	153.55	15.4103	3.94582	0.00523142	0.364322	Up	0.193106	4.18221	1:225923449:225924467:-	23597065	1
NONRATT003668.2	17.4373	34.8745	0	0	#NAME?	0.0244695	0.839543	Down	2.56095	1.52489e-39	1:242582582:242607982:-	23662429	2
NONRATT003682.2	32.8925	62.7742	3.01079	0.0479623	-4.38196	0.0267184	0.874064	Down	2.32055	0.152594	1:245476402:245482170:-	23670435	3
NONRATT003683.2	96.2376	29.8925	162.583	5.43892	2.44332	0.0497772	1	Up	0.828625	6.0005	1:245476402:245514262:-	23671184	5
NONRATT003698.2	30.8889	61.7778	0	0	#NAME?	0.00367933	0.294075	Down	1.78703	1.71181e-14	1:247502378:247510760:-	23682208	4
NONRATT003723.2	37.6349	0	75.2698	Inf	Inf	0.00155637	0.17656	Up	2.36284e-07	1.30026	1:253119110:253122079:-	23701227	2
NONRATT003860.2	18.9355	36.8674	1.0036	0.0272218	-5.19909	0.0474538	1	Down	1.18809	0.0465154	1:266048832:266051081:-	23783138	2
NONRATT003943.2	56.6997	0.996416	112.403	112.807	6.81772	0.000651135	0.0897992	Up	0.0410952	4.25113	1:277606501:277609247:-	23835295	2
NONRATT003986.2	107.219	185.333	29.1043	0.157038	-2.67082	0.0290442	0.897946	Down	4.60366	0.975055	10:5211083:5211916:+	23877970	1
NONRATT004020.2	18.563	0.996416	36.1295	36.2595	5.18029	0.0495016	1	Up	0.0793477	2.58562	10:11153142:11153936:+	23899853	3
NONRATT004036.2	150.865	48.8244	252.907	5.17992	2.37293	0.0328956	0.960046	Up	0.725271	4.98651	10:730270:751058:+	23856098	5
NONRATT004038.2	16.0576	0	32.1151	Inf	Inf	0.0301165	0.913035	Up	8.59818e-24	1.44165	10:733885:750412:+	23857558	3
NONRATT004054.2	37.6349	0	75.2698	Inf	Inf	0.00155637	0.17656	Up	0.0123401	5.10864	10:12994635:12995679:+	23910975	2
NONRATT004058.2	37.6313	0.996416	74.2662	74.5334	6.21981	0.00478487	0.346952	Up	0.0265547	1.98504	10:13067604:13068640:+	23912642	1
NONRATT004310.2	13.5486	0	27.0971	Inf	Inf	0.0452097	1	Up	1.34794e-20	1.5735	10:43496099:43496665:+	24067494	2
NONRATT004323.2	20.0719	0	40.1439	Inf	Inf	0.0161176	0.661008	Up	3.81157e-10	1.85593	10:43768708:43769771:+	24074839	2
NONRATT004383.2	26.9032	53.8064	0	0	#NAME?	0.00622647	0.405499	Down	0.957028	0.00430269	10:49307129:49310400:+	24118026	2
NONRATT004419.2	109.793	27.8996	191.687	6.87059	2.78044	0.0229219	0.810157	Up	0.720171	6.64055	10:54468424:54469891:+	24140574	2
NONRATT004493.2	15.054	0	30.1079	Inf	Inf	0.0353531	0.988802	Up	3.61022e-31	2.60283	10:57132534:57132857:+	24187970	1
NONRATT004667.2	114.801	30.8889	198.712	6.43313	2.68552	0.0256447	0.856064	Up	0.317733	2.75041	10:70689910:70721891:+	24322242	17
NONRATT004734.2	218.477	363.692	73.2626	0.201442	-2.31157	0.0241821	0.839543	Down	8.39478	2.26542	10:73903211:73905142:-	25057410	2
NONRATT004831.2	106.378	0.996416	211.759	212.521	7.73146	1.01996e-05	0.00358693	Up	0.00488	2.16606	10:85782432:85785130:+	24442657	1
NONRATT004895.2	22.0791	0	44.1583	Inf	Inf	0.0119656	0.562942	Up	4.44971e-09	2.58881	10:89036452:89037453:+	24476801	4
NONRATT005096.2	21.9211	43.8423	0	0	#NAME?	0.0123692	0.566766	Down	1.60433	2.47411e-25	10:105787897:105792465:+	24600391	4
NONRATT005117.2	13.5486	0	27.0971	Inf	Inf	0.0452097	1	Up	1.55737e-26	1.39325	10:107025777:107030208:+	24614272	2
NONRATT005158.2	41.3584	80.7097	2.00719	0.0248693	-5.32949	0.00671671	0.421804	Down	2.68131	0.0775386	10:110422966:110424759:+	24637295	5
NONRATT005180.2	109.815	21.9211	197.709	9.01909	3.17298	0.0109096	0.532865	Up	0.424987	5.16223	10:4904201:4905262:-	24653024	1
NONRATT005222.2	35.1259	0	70.2518	Inf	Inf	0.00211934	0.213633	Up	0.000353756	4.90525	10:11990579:11994459:-	24682936	5
NONRATT005309.2	78.2195	16.9391	139.5	8.2354	3.04184	0.0252231	0.856064	Up	0.629363	7.13442	10:15417622:15431869:-	24740818	2
NONRATT005328.2	22.4193	44.8387	0	0	#NAME?	0.0115145	0.550933	Down	1.11303	0	10:16769853:16774901:-	24752314	2
NONRATT005335.2	393.03	105.62	680.439	6.44233	2.68758	0.00435975	0.326216	Up	1.75611	15.0906	10:17044161:17045408:-	24757554	1
NONRATT005336.2	109.292	27.8996	190.683	6.83462	2.77286	0.0234056	0.825181	Up	1.20983	11.1775	10:17045485:17045956:-	24758025	1
NONRATT005357.2	574.491	18.9319	1130.05	59.6903	5.89942	3.04759e-08	2.52179e-05	Up	0.316391	25.525	10:25860699:25861923:-	24768005	1
NONRATT005359.2	17.0612	0	34.1223	Inf	Inf	0.0257245	0.856064	Up	7.31755e-20	1.14937	10:25873592:25874402:-	24768815	1
NONRATT005363.2	82.7896	1.99283	163.586	82.0874	6.35909	0.000157336	0.0283749	Up	0.0462928	6.32554	10:29020028:29025486:-	24770596	6
NONRATT005389.2	103.129	206.258	0	0	#NAME?	2.92485e-06	0.001112	Down	14.6731	0	10:35737593:35737885:-	24791365	1
NONRATT005557.2	32.3835	64.767	0	0	#NAME?	0.00303544	0.268551	Down	1.71499	5.55867e-13	10:55430432:55482483:-	24898035	5
NONRATT005615.2	47.6421	7.97132	87.313	10.9534	3.4533	0.0342375	0.980033	Up	0.382462	5.5884	10:56845456:56846416:-	24932852	2
NONRATT005661.2	18.563	0.996416	36.1295	36.2595	5.18029	0.0495016	1	Up	0.00569729	0.475144	10:59010874:59013438:-	24960897	2
NONRATT005772.2	23.5845	0	47.1691	Inf	Inf	0.0096673	0.499963	Up	2.65626e-16	2.34516	10:67753080:67753637:-	25026477	1
NONRATT005834.2	28.3978	56.7957	0	0	#NAME?	0.00510134	0.364266	Down	1.73098	1.82028e-24	10:75335238:75336332:+	24357582	2
NONRATT005847.2	22.9176	45.8351	0	0	#NAME?	0.0107286	0.528773	Down	1.84061	8.42558e-17	10:74883461:74884200:+	24349780	2
NONRATT005856.2	24.0792	1.99283	46.1655	23.1658	4.53392	0.0432998	1	Up	0.0898229	2.77686	10:74413979:74431121:+	24342097	4
NONRATT005949.2	253.408	0	506.817	Inf	Inf	8.1519e-10	1.88739e-06	Up	0.0106296	20.5001	10:85096508:85099341:-	25136346	3
NONRATT005984.2	13.5486	0	27.0971	Inf	Inf	0.0452097	1	Up	2.54253e-27	0.703411	10:86901949:86904923:-	25160460	5
NONRATT006021.2	28.3978	56.7957	0	0	#NAME?	0.00510134	0.364266	Down	3.02283	7.87525e-16	10:88433865:88434704:-	25181287	2
NONRATT006055.2	30.8961	59.7849	2.00719	0.0335736	-4.89653	0.0203117	0.754307	Down	2.94105	0.137902	10:89371315:89371737:-	25199310	1
NONRATT006082.2	31.6133	0	63.2266	Inf	Inf	0.00330837	0.282054	Up	7.33969e-05	5.16407	10:90260896:90263205:-	25215115	3
NONRATT006101.2	22.4193	44.8387	0	0	#NAME?	0.0115145	0.550933	Down	1.59453	1.36428e-13	10:90644990:90645567:-	25226282	1
NONRATT006212.2	166.428	46.8315	286.025	6.10754	2.61059	0.0175466	0.699231	Up	0.538396	4.42479	10:97733700:97735485:-	25296103	1
NONRATT006242.2	149.961	299.921	0	0	#NAME?	1.32204e-07	9.78799e-05	Down	14.2177	1.7794e-06	10:102244679:102245116:-	25314134	1
NONRATT006258.2	32.3835	64.767	0	0	#NAME?	0.00303544	0.268551	Down	2.19762	0	10:104512808:104513681:+	24591568	2
NONRATT006347.2	37.3728	72.7383	2.00719	0.0275947	-5.17946	0.0101266	0.50973	Down	1.83217	0.063063	10:109371571:109372564:-	25385612	2
NONRATT006370.2	19.5701	0	39.1403	Inf	Inf	0.0174017	0.695424	Up	0	3.23819	10:109821097:109822045:-	25401932	3
NONRATT006443.2	111.1	222.201	0	0	#NAME?	1.64042e-06	0.000678698	Down	11.0929	3.8528e-06	11:31806635:31812815:+	25450850	3
NONRATT006480.2	13.0468	0	26.0935	Inf	Inf	0.0490969	1	Up	1.37926e-10	1.67282	11:34598299:34639826:+	25483408	5
NONRATT006483.2	17.4373	34.8745	0	0	#NAME?	0.0244695	0.839543	Down	1.17161	9.70872e-11	11:34610074:34616885:+	25484414	7
NONRATT006490.2	311.552	574.932	48.1727	0.0837885	-3.5771	0.00044791	0.0670511	Down	4.77065	0.532084	11:35586020:35588517:+	25490564	1
NONRATT006517.2	129.313	41.8495	216.777	5.17992	2.37293	0.0396045	1	Up	0.874642	6.09897	11:45008249:45009230:+	25508826	1
NONRATT006530.2	370.38	124.552	616.209	4.9474	2.30667	0.0137224	0.599889	Up	2.93001	19.3205	11:46205838:46206720:+	25515557	1
NONRATT006538.2	105.717	184.337	27.0971	0.146998	-2.76613	0.024917	0.850747	Down	3.77575	0.728126	11:47055822:47068941:+	25521545	5
NONRATT006697.2	13.5486	0	27.0971	Inf	Inf	0.0452097	1	Up	4.49632e-27	1.24853	11:81372237:81373037:+	25618248	3
NONRATT006707.2	18.9319	37.8638	0	0	#NAME?	0.0193846	0.735103	Down	2.01126	1.94693e-27	11:82384280:82385297:+	25625276	2
NONRATT006734.2	68.8029	123.556	14.0504	0.113717	-3.13648	0.0273006	0.880819	Down	4.83706	0.718042	11:86091020:86092915:+	25640624	2
NONRATT006743.2	20.5737	0	41.1475	Inf	Inf	0.0149396	0.62738	Up	0	4.82071	11:86915496:86915732:+	25643552	1
NONRATT006826.2	21.0755	0	42.1511	Inf	Inf	0.0138597	0.599889	Up	1.75997e-27	2.75842	11:24479799:24491906:-	25699428	3
NONRATT006833.2	17.0612	0	34.1223	Inf	Inf	0.0257245	0.856064	Up	1.12932e-32	3.30669	11:27056091:27058587:-	25704526	3
NONRATT006873.2	20.9247	41.8495	0	0	#NAME?	0.0143176	0.610318	Down	3.19803	3.49446e-27	11:31788282:31788553:-	25728041	1
NONRATT007051.2	16.5594	0	33.1187	Inf	Inf	0.0278338	0.882102	Up	1.43174e-31	2.2395	11:70286420:70286832:-	25844570	1
NONRATT007057.2	24.9104	49.8208	0	0	#NAME?	0.00814365	0.460119	Down	2.99528	1.2608e-15	11:70570446:70570791:-	25848595	1
NONRATT007126.2	6969.35	2263.86	11674.8	5.15706	2.36655	0.00992364	0.507621	Up	113.603	781.716	11:81421672:81423274:-	25905719	2
NONRATT007161.2	156.61	265.047	48.1727	0.181752	-2.45996	0.026281	0.867507	Down	5.73027	1.39964	11:84609966:84610925:-	25924614	1
NONRATT007218.2	13.4516	26.9032	0	0	#NAME?	0.046296	1	Down	0.528347	1.8101e-11	12:2172196:2173257:+	25963389	1
NONRATT007280.2	40.8782	74.7312	7.02518	0.094006	-3.4111	0.0464743	1	Down	3.1238	0.395286	12:12665425:12666756:+	26001816	2
NONRATT007340.2	21.9211	43.8423	0	0	#NAME?	0.0123692	0.566766	Down	2.06407	2.82709e-09	12:18534212:18534765:+	26036159	2
NONRATT007391.2	1058.76	1957.96	159.572	0.0814992	-3.61707	6.19941e-05	0.013016	Down	11.7105	1.27469	12:23814418:23817884:+	26073550	1
NONRATT007399.2	29.6061	0	59.2122	Inf	Inf	0.00429661	0.323211	Up	1.53006e-19	0.797728	12:24313388:24315441:+	26078799	1
NONRATT007528.2	17.563	0	35.1259	Inf	Inf	0.0237761	0.829923	Up	2.91122e-18	2.67233	12:39553902:39554264:+	26154350	1
NONRATT007530.2	435.533	7.97132	863.094	108.275	6.75855	6.6963e-09	8.56336e-06	Up	0.279535	38.3078	12:39599116:39599823:+	26155270	2
NONRATT007812.2	44.3441	87.6846	1.0036	0.0114455	-6.44907	0.00234375	0.228839	Down	0.681681	0.0128595	12:18463900:18466576:-	26334582	1
NONRATT008016.2	181.585	296.932	66.2374	0.223073	-2.16441	0.0409805	1	Down	8.73586	2.58715	12:41623687:41624501:-	26459079	2
NONRATT008097.2	107.385	0	214.77	Inf	Inf	2.08827e-06	0.000815993	Up	1.5352e-08	23.567	12:51335029:51341712:-	26506296	3
NONRATT008127.2	138.898	27.8996	249.896	8.95695	3.16301	0.00716231	0.436157	Up	2.13192	25.2121	13:12298542:12298816:+	26524583	1
NONRATT008144.2	23.5845	0	47.1691	Inf	Inf	0.0096673	0.499963	Up	1.05276e-23	4.45044	13:29576354:29576648:+	26534392	1
NONRATT008180.2	191.81	383.62	0	0	#NAME?	1.35236e-08	1.35883e-05	Down	10.7419	0.000511076	13:44974929:44986951:+	26559858	5
NONRATT008217.2	95.2627	21.9211	168.604	7.6914	2.94325	0.0213182	0.774891	Up	0.507567	5.18772	13:50252657:50258949:+	26582744	4
NONRATT008236.2	96.3382	1.99283	190.683	95.6847	6.58022	5.66278e-05	0.0122551	Up	0.0807738	9.24227	13:51795920:51801377:+	26594762	4
NONRATT008267.2	39.1331	1.99283	76.2734	38.2739	5.25829	0.0083139	0.464094	Up	0.0451235	2.78196	13:53419891:53420649:+	26616212	1
NONRATT008373.2	45.1619	0	90.3238	Inf	Inf	0.000644762	0.0897992	Up	4.18328e-09	3.52088	13:78853131:78854210:+	26689776	3
NONRATT008386.2	30.9032	57.7921	4.01439	0.0694626	-3.84762	0.0478382	1	Down	2.48968	0.216178	13:78973627:78979300:+	26700026	4
NONRATT008391.2	464.406	211.24	717.572	3.39695	1.76424	0.0477167	1	Up	5.36753	24.3312	13:79204474:79205290:+	26703534	1
NONRATT008517.2	124.299	40.853	207.745	5.08517	2.3463	0.043622	1	Up	0.536363	3.66525	13:98966434:98969051:+	26781003	3
NONRATT008544.2	17.4373	34.8745	0	0	#NAME?	0.0244695	0.839543	Down	0.359814	3.45932e-07	13:103408353:103410345:+	26797561	1
NONRATT008570.2	45.1511	2.98925	87.313	29.209	4.86834	0.00794514	0.459935	Up	0.100003	3.51248	13:109697161:109697848:+	26813623	1
NONRATT008580.2	721.411	48.8244	1394	28.5513	4.83548	8.60062e-07	0.000378078	Up	0.608211	23.2327	13:110522778:110524750:+	26821854	2
NONRATT008646.2	50.6781	0.996416	100.36	100.721	6.65422	0.00119356	0.151259	Up	0.0105004	1.45371	13:35494715:35503484:-	26863515	3
NONRATT008653.2	13.9498	27.8996	0	0	#NAME?	0.042665	1	Down	1.53259	2.70105e-29	13:35858096:35858476:-	26869685	1
NONRATT008709.2	26.9032	53.8064	0	0	#NAME?	0.00622647	0.405499	Down	3.41187	1.00152e-26	13:50557668:50558087:-	26909440	2
NONRATT008761.2	27.8996	55.7993	0	0	#NAME?	0.00545086	0.37222	Down	0.532705	5.10253e-12	13:53750469:53752636:-	26943374	1
NONRATT008780.2	219.71	439.419	0	0	#NAME?	3.57687e-09	5.59064e-06	Down	21.7763	0.00105888	13:56993003:57030242:-	26955547	3
NONRATT008838.2	13.4516	26.9032	0	0	#NAME?	0.046296	1	Down	2.28212	0	13:72912017:72912261:-	26994557	1
NONRATT009130.2	87.3022	2.98925	171.615	57.4108	5.84325	0.000229305	0.039337	Up	0.0833341	5.62435	13:110219278:110220123:-	27184173	1
NONRATT009156.2	68.8029	123.556	14.0504	0.113717	-3.13648	0.0273006	0.880819	Down	6.93884	1.05145	14:570243:612045:+	27201194	3
NONRATT009189.2	45.3369	90.6738	0	0	#NAME?	0.000642011	0.0897992	Down	0.994057	4.15208e-11	14:3680661:3682553:+	27216814	1
NONRATT009200.2	24.9104	49.8208	0	0	#NAME?	0.00814365	0.460119	Down	1.42453	1.94145e-12	14:7125988:7128215:+	27223892	2
NONRATT009236.2	400.18	627.742	172.619	0.274984	-1.86258	0.0409376	1	Down	11.5036	4.2271	14:12027378:12028509:+	27251553	1
NONRATT009260.2	291.993	571.943	12.0432	0.0210566	-5.56958	1.45613e-06	0.00062071	Down	10.513	0.295414	14:17621404:17631613:+	27268767	8
NONRATT009281.2	67.7563	135.513	0	0	#NAME?	6.03085e-05	0.0128539	Down	10.8733	1.27551e-09	14:22445342:22445601:+	27280459	1
NONRATT009284.2	22.5809	0	45.1619	Inf	Inf	0.0111349	0.538264	Up	2.20264e-08	2.15011	14:22631314:22631889:+	27282964	1
NONRATT009304.2	27.9068	53.8064	2.00719	0.037304	-4.74453	0.0283378	0.888281	Down	1.57298	0.0768351	14:33644633:33647268:+	27295899	3
NONRATT009362.2	16.9391	33.8781	0	0	#NAME?	0.0264563	0.867507	Down	1.05632	1.68167e-08	14:44456586:44457242:+	27333721	1
NONRATT009365.2	20.9247	41.8495	0	0	#NAME?	0.0143176	0.610318	Down	1.67418	1.09417e-22	14:44496823:44498197:+	27337047	2
NONRATT009395.2	33.1187	0	66.2374	Inf	Inf	0.0027284	0.252502	Up	2.70715e-10	2.08858	14:61145601:61164349:+	27350243	7
NONRATT009403.2	15.4444	30.8889	0	0	#NAME?	0.0334801	0.965091	Down	0.977813	1.52654e-23	14:64686861:64695277:+	27355289	2
NONRATT009419.2	79.7132	159.426	0	0	#NAME?	1.97893e-05	0.00610054	Down	5.45078	0.00195015	14:71437009:71452244:+	27364096	6
NONRATT009626.2	62.6817	11.957	113.406	9.48454	3.24558	0.0274652	0.881112	Up	0.636274	7.8868	14:107617513:107617910:+	27493075	1
NONRATT009793.2	293.943	587.885	0	0	#NAME?	1.80758e-10	8.47573e-07	Down	28.3946	0.000598874	14:19028809:19029238:-	27622718	1
NONRATT009876.2	13.9498	27.8996	0	0	#NAME?	0.042665	1	Down	1.09215	1.7301e-12	14:42478792:42491067:-	27677063	6
NONRATT009960.2	549.835	37.8638	1061.81	28.0428	4.80956	1.74261e-06	0.00070038	Up	0.268939	10.0672	14:69896525:69899441:-	27730201	1
NONRATT009965.2	113.097	225.19	1.0036	0.00445667	-7.80982	6.60344e-06	0.00244449	Down	14.8705	0.0757101	14:71261399:71261713:-	27731757	1
NONRATT010050.2	197.966	67.7563	328.176	4.84348	2.27605	0.0293213	0.902544	Up	1.21819	7.84528	14:82118094:82119251:-	27778798	1
NONRATT010080.2	14.448	28.8961	0	0	#NAME?	0.0393298	1	Down	0.254606	5.31166e-08	14:83648400:83660792:-	27802193	6
NONRATT010085.2	72.1908	18.9319	125.45	6.62637	2.72822	0.046553	1	Up	0.314954	2.71843	14:83880927:83882200:-	27805594	1
NONRATT010095.2	127.617	234.158	21.0755	0.0900058	-3.47384	0.00442539	0.329375	Down	12.2964	1.46463	14:84184635:84189235:-	27811072	3
NONRATT010108.2	20.4265	40.853	0	0	#NAME?	0.0154268	0.640143	Down	0.508382	1.31723e-25	14:85357220:85358884:-	27822496	1
NONRATT010133.2	33.1187	0	66.2374	Inf	Inf	0.0027284	0.252502	Up	5.9987e-16	3.03974	14:89197556:89201117:-	27843163	4
NONRATT010196.2	35.3728	70.7455	0	0	#NAME?	0.00208322	0.213633	Down	6.02836	1.69919e-81	14:110728075:110728318:-	27879362	1
NONRATT010217.2	23.914	47.8279	0	0	#NAME?	0.00933557	0.490013	Down	2.1133	0.00124201	14:115006910:115052456:-	27892246	4
NONRATT010241.2	141.346	44.8387	237.853	5.30463	2.40725	0.0332628	0.965091	Up	2.50801	17.859	15:4130600:4130969:+	27907921	1
NONRATT010360.2	478.279	956.559	0	0	#NAME?	1.03808e-12	1.46026e-08	Down	75.088	2.9902e-06	15:27875918:27879677:+	27985416	2
NONRATT010468.2	21.0755	0	42.1511	Inf	Inf	0.0138597	0.599889	Up	1.00467e-12	3.10948	15:37156408:37171290:+	28044833	3
NONRATT010697.2	15.9426	31.8853	0	0	#NAME?	0.0309318	0.919909	Down	0.967428	0.00401929	15:107789378:107790070:+	28186608	1
NONRATT010720.2	14.5522	0	29.1043	Inf	Inf	0.0383545	1	Up	1.8818e-07	0.708378	15:2685504:2686639:-	28200145	1
NONRATT010761.2	14.9462	29.8925	0	0	#NAME?	0.0362738	1	Down	1.06287	5.32314e-08	15:12872409:12887889:-	28225071	5
NONRATT010833.2	36.3799	69.7491	3.01079	0.043166	-4.53396	0.0187922	0.722585	Down	3.5013	0.16771	15:28308828:28309632:-	28262356	3
NONRATT010913.2	46.1439	5.97849	86.3094	14.4366	3.85166	0.0227303	0.805409	Up	0.191715	3.44165	15:34473037:34474447:-	28318394	4
NONRATT011059.2	18.9319	37.8638	0	0	#NAME?	0.0193846	0.735103	Down	2.3052	5.04712e-05	15:51989008:51995191:-	28409557	4
NONRATT011088.2	66.7392	0	133.478	Inf	Inf	6.53318e-05	0.013515	Up	0.00991167	4.92625	15:57185443:57186195:-	28425744	1
NONRATT011125.2	82.2519	11.957	152.547	12.758	3.67333	0.00809981	0.460119	Up	0.342335	6.04575	15:69928503:69929201:-	28453701	1
NONRATT011168.2	44.8602	83.6989	6.02158	0.0719434	-3.79699	0.0256561	0.856064	Down	1.64222	0.147846	15:89267695:89268751:-	28487058	1
NONRATT011188.2	745.535	316.86	1174.21	3.70576	1.88977	0.0273831	0.881112	Up	11.9065	58.9413	15:102123540:102124091:-	28498465	1
NONRATT011233.2	70.2518	0	140.504	Inf	Inf	4.64664e-05	0.0111366	Up	6.22668e-06	0.897258	16:1950294:1954629:+	28526482	1
NONRATT011251.2	73.2365	146.473	0	0	#NAME?	3.57465e-05	0.00985973	Down	5.29593	2.08565e-25	16:3100204:3101927:+	28536536	3
NONRATT011287.2	86.1899	172.38	0	0	#NAME?	1.12666e-05	0.00377351	Down	4.17329	1.10131e-05	16:7344653:7345508:+	28560067	1
NONRATT011342.2	274.778	475.29	74.2662	0.156254	-2.67803	0.00725964	0.440178	Down	4.11395	0.853389	16:18706166:18709135:+	28599894	2
NONRATT011376.2	16.0576	0	32.1151	Inf	Inf	0.0301165	0.913035	Up	1.83229e-12	1.16904	16:19792840:19793995:+	28622880	2
NONRATT011388.2	58.7885	117.577	0	0	#NAME?	0.000148681	0.0275196	Down	7.36693	1.60764e-20	16:20025594:20025925:+	28627342	1
NONRATT011430.2	32.1151	0	64.2302	Inf	Inf	0.00310153	0.270989	Up	1.0315e-08	0.450921	16:21153726:21160176:+	28658131	6
NONRATT011433.2	39.3584	78.7168	0	0	#NAME?	0.0012829	0.154735	Down	1.9335	2.06503e-11	16:21263999:21266056:+	28661317	2
NONRATT011497.2	56.8101	109.606	4.01439	0.0366257	-4.771	0.00455487	0.336313	Down	2.99865	0.134403	16:47667427:47668184:+	28697784	1
NONRATT011510.2	169.531	299.921	39.1403	0.130502	-2.93786	0.00821394	0.46034	Down	7.92907	1.37125	16:49103477:49107629:+	28707312	2
NONRATT011511.2	364.961	653.649	76.2734	0.116689	-3.09926	0.00141047	0.165343	Down	18.0251	2.79224	16:49163593:49169307:+	28708064	3
NONRATT011638.2	898.65	19.9283	1777.37	89.1882	6.47878	9.39199e-10	1.88739e-06	Up	0.242592	28.7296	16:74552812:74554523:+	28788840	1
NONRATT011761.2	138.635	240.136	37.1331	0.154634	-2.69307	0.01923	0.735077	Down	7.19595	1.49558	16:7741976:7758100:-	28856108	5
NONRATT011762.2	314.624	557.993	71.2554	0.1277	-2.96917	0.00264357	0.249578	Down	16.5858	2.81932	16:7745610:7758332:-	28856805	5
NONRATT011771.2	39.3584	78.7168	0	0	#NAME?	0.0012829	0.154735	Down	3.20521	6.12787e-12	16:8339237:8350047:-	28865406	4
NONRATT011868.2	436.474	721.405	151.543	0.210067	-2.25108	0.0137115	0.599889	Down	18.6231	5.20938	16:20647056:20649847:-	28927850	5
NONRATT011887.2	37.1151	4.98208	69.2482	13.8995	3.79696	0.0364307	1	Up	0.240497	4.80001	16:21023922:21027026:-	28937514	4
NONRATT011907.2	60.1656	13.9498	106.381	7.626	2.93093	0.0456402	1	Up	0.403351	4.02743	16:22617346:22623103:-	28946856	2
NONRATT011950.2	30.1007	1.99283	58.2086	29.209	4.86834	0.021908	0.788697	Up	0.0428935	2.06648	16:36078804:36080101:-	28975644	2
NONRATT011965.2	224.132	47.8279	400.435	8.37241	3.06564	0.00365732	0.294075	Up	3.88253	43.4473	16:39608977:39609232:-	28982438	1
NONRATT011977.2	46.6673	0	93.3346	Inf	Inf	0.000543861	0.078871	Up	2.81354e-08	1.85228	16:47857346:47861174:-	28989936	2
NONRATT012137.2	15.9426	31.8853	0	0	#NAME?	0.0309318	0.919909	Down	1.89873	2.91187e-26	16:81658065:81664920:-	29085754	2
NONRATT012139.2	77.2222	154.444	0	0	#NAME?	2.47591e-05	0.00741034	Down	9.84759	5.29249e-11	16:81784347:81784673:-	29087049	1
NONRATT012253.2	24.4122	48.8244	0	0	#NAME?	0.00871695	0.473441	Down	2.52803	1.62031e-10	17:9109696:9110258:+	29150667	2
NONRATT012330.2	57.1799	6.97491	107.385	15.3959	3.94447	0.0126939	0.577436	Up	0.265366	5.32891	17:15586382:15603195:+	29192009	4
NONRATT012479.2	1852.26	384.616	3319.9	8.63172	3.10965	0.00037181	0.0584851	Up	25.6195	295.2	17:43632392:43632703:+	29289733	1
NONRATT012480.2	1798.73	337.785	3259.68	9.65018	3.27056	0.000201374	0.0354091	Up	9.04239	116.471	17:43633688:43634462:+	29290507	1
NONRATT012538.2	4336.98	1410.92	7263.03	5.14771	2.36393	0.00703981	0.432441	Up	16.3228	112.076	17:44792087:44793879:-	29612472	1
NONRATT012540.2	4123.75	1399.96	6847.54	4.89123	2.2902	0.00859479	0.470439	Up	74.041	483.055	17:44744509:44744901:-	29610255	1
NONRATT012570.2	23.0827	0	46.1655	Inf	Inf	0.0103711	0.513699	Up	1.10728e-06	4.0903	17:62464422:62464735:+	29350458	1
NONRATT012581.2	33.6205	0	67.241	Inf	Inf	0.00256022	0.243342	Up	2.27577e-13	6.35243	17:69495324:69497132:+	29354697	2
NONRATT012625.2	107.761	34.8745	180.648	5.17992	2.37293	0.0490803	1	Up	2.01711	13.8669	17:77588029:77588390:+	29382433	1
NONRATT012636.2	140.504	0	281.007	Inf	Inf	2.27884e-07	0.000139376	Up	2.70561e-05	9.28033	17:80887573:80891202:+	29389167	5
NONRATT012705.2	38.362	76.724	0	0	#NAME?	0.00144557	0.166679	Down	0.862189	8.13129e-10	17:1029241:1031079:-	29434582	2
NONRATT012724.2	22.4193	44.8387	0	0	#NAME?	0.0115145	0.550933	Down	1.34429	1.87253e-23	17:3718225:3718933:-	29447850	2
NONRATT012775.2	24.0863	0	48.1727	Inf	Inf	0.00901748	0.48788	Up	1.83736e-17	1.84344	17:9523793:9524523:-	29479451	1
NONRATT012812.2	476.503	753.29	199.716	0.265125	-1.91526	0.0319297	0.939655	Down	8.21787	2.90793	17:11046086:11049561:-	29508540	3
NONRATT012872.2	408.524	679.555	137.493	0.202328	-2.30523	0.0125244	0.572014	Down	28.8812	7.76329	17:21981946:21982434:-	29540850	1
NONRATT012887.2	26.0935	0	52.1871	Inf	Inf	0.00686168	0.425213	Up	1.24017e-24	1.91696	17:24021773:24033220:-	29553047	3
NONRATT012952.2	15.9426	31.8853	0	0	#NAME?	0.0309318	0.919909	Down	0.838705	5.97029e-06	17:42085029:42088445:-	29593140	2
NONRATT013036.2	606.519	182.344	1030.69	5.65247	2.49888	0.00499134	0.360068	Up	6.47791	48.7984	17:44748559:44749143:+	29302751	1
NONRATT013044.2	580.014	157.434	1002.59	6.36836	2.67092	0.00300136	0.268551	Up	5.39833	45.9614	17:44520536:44521139:+	29297920	1
NONRATT013083.2	1314.66	2241.93	387.389	0.172792	-2.53289	0.00305626	0.268702	Down	40.8654	9.41042	17:69639276:69642741:-	29671319	3
NONRATT013084.2	268.807	461.34	76.2734	0.16533	-2.59658	0.00926662	0.490013	Down	15.3882	3.37274	17:69640046:69648665:-	29671941	6
NONRATT013085.2	579.219	1074.14	84.3022	0.0784837	-3.67146	9.84925e-05	0.0189794	Down	31.0488	3.25859	17:69640079:69683675:-	29672658	6
NONRATT013086.2	21.9211	43.8423	0	0	#NAME?	0.0123692	0.566766	Down	1.45677	0	17:69667521:69668145:-	29673282	1
NONRATT013199.2	20.4265	40.853	0	0	#NAME?	0.0154268	0.640143	Down	3.38708	0	18:820307:820560:+	29742765	1
NONRATT013322.2	13.0468	0	26.0935	Inf	Inf	0.0490969	1	Up	6.35849e-10	1.01225	18:28361227:28371529:+	29830927	2
NONRATT013333.2	15.054	0	30.1079	Inf	Inf	0.0353531	0.988802	Up	2.92134e-10	1.09466	18:28383053:28386632:+	29839090	2
NONRATT013472.2	485.543	751.297	219.788	0.292544	-1.77327	0.0455244	1	Down	45.5581	17.7448	18:55498331:55506250:+	29933716	2
NONRATT013587.2	20.4265	40.853	0	0	#NAME?	0.0154268	0.640143	Down	0.906299	1.2266e-18	18:76922918:76923851:-	30258933	1
NONRATT013635.2	941.461	1507.58	375.345	0.248973	-2.00594	0.0180641	0.70782	Down	69.7363	23.1934	18:81715528:81726821:+	30051352	4
NONRATT013676.2	31.1115	0	62.223	Inf	Inf	0.00353011	0.28871	Up	3.50581e-11	2.3761	18:12283264:12284143:-	30075312	2
NONRATT013687.2	533.883	843.964	223.802	0.26518	-1.91496	0.029858	0.913035	Down	58.3211	20.5879	18:15536212:15540087:-	30080786	3
NONRATT013721.2	4301.19	7163.23	1439.16	0.200909	-2.31538	0.00814456	0.460119	Down	72.8849	19.5387	18:26183752:26212799:-	30101655	4
NONRATT013786.2	16.9391	33.8781	0	0	#NAME?	0.0264563	0.867507	Down	1.11978	0	18:31727300:31727934:-	30146942	1
NONRATT013849.2	21.9247	42.8459	1.0036	0.0234234	-5.4159	0.0317135	0.937215	Down	0.712191	0.0315965	18:56724714:56725974:-	30190990	1
NONRATT013897.2	141.338	46.8315	235.845	5.03604	2.33229	0.0385477	1	Up	0.690511	4.58732	18:63365471:63370522:-	30225768	3
NONRATT013925.2	20.0719	0	40.1439	Inf	Inf	0.0161176	0.661008	Up	4.90701e-15	1.4315	18:70176832:70184302:-	30244549	5
NONRATT014026.2	43.6493	1.99283	85.3058	42.8063	5.41975	0.0052575	0.364322	Up	0.0728432	3.52243	19:10338514:10339186:+	30301503	1
NONRATT014179.2	23.5774	1.99283	45.1619	22.6622	4.50221	0.0459001	1	Up	0.107369	2.77004	19:32778230:32783707:+	30397019	4
NONRATT014316.2	41.6493	0	83.2986	Inf	Inf	0.000964993	0.124537	Up	2.49481e-29	3.60696	19:49457741:49470479:+	30485897	6
NONRATT014341.2	13.4516	26.9032	0	0	#NAME?	0.046296	1	Down	2.11935	0	19:52762854:52763115:+	30499199	1
NONRATT014438.2	14.5522	0	29.1043	Inf	Inf	0.0383545	1	Up	1.92726e-10	1.32631	19:9278578:9279183:-	30558771	1
NONRATT014577.2	196.033	325.828	66.2374	0.20329	-2.29839	0.0282406	0.888281	Down	6.51611	1.77187	19:26005957:26006995:-	30649241	1
NONRATT014579.2	20.0719	0	40.1439	Inf	Inf	0.0161176	0.661008	Up	1.02617e-07	4.29214	19:26074976:26075232:-	30649769	1
NONRATT014669.2	16.0576	0	32.1151	Inf	Inf	0.0301165	0.913035	Up	3.54724e-06	1.09561	19:40927007:40935880:-	30711016	3
NONRATT014670.2	14.448	28.8961	0	0	#NAME?	0.0393298	1	Down	0.740076	0.00033627	19:40927008:40927814:-	30711822	1
NONRATT014684.2	79.7644	5.97849	153.55	25.6838	4.68279	0.00173387	0.190136	Up	0.246308	7.89927	19:41666214:41666752:-	30720896	1
NONRATT014687.2	39.8782	73.7348	6.02158	0.0816655	-3.61413	0.0388958	1	Down	1.32303	0.13752	19:41675324:41676874:-	30724149	2
NONRATT014799.2	23.914	47.8279	0	0	#NAME?	0.00933557	0.490013	Down	1.3967	1.28134e-14	19:55720364:55862204:-	30792370	7
NONRATT014828.2	33.8781	67.7563	0	0	#NAME?	0.00251118	0.240304	Down	1.92013	5.40484e-10	19:57604728:57613181:-	30806260	4
NONRATT014946.2	82.2043	164.409	0	0	#NAME?	1.58827e-05	0.00507777	Down	6.636	9.5879e-07	2:27236102:27236615:+	30877877	1
NONRATT014982.2	190.103	21.9211	358.284	16.3442	4.03071	0.000448056	0.0670511	Up	0.48316	10.5768	2:34315072:34338342:+	30898036	10
NONRATT015129.2	29.8996	57.7921	2.00719	0.0347313	-4.84762	0.0226778	0.805409	Down	2.45681	0.127984	2:84658212:84658696:+	31002569	1
NONRATT015154.2	592.84	914.709	270.971	0.296238	-1.75517	0.043242	1	Down	21.7826	8.61453	2:93715082:93724649:+	31017363	2
NONRATT015173.2	27.4014	54.8029	0	0	#NAME?	0.00582553	0.392095	Down	2.59871	5.03004e-17	2:100696612:100697049:+	31029001	1
NONRATT015280.2	23.914	47.8279	0	0	#NAME?	0.00933557	0.490013	Down	2.56136	8.76135e-17	2:141451227:141451615:+	31098824	1
NONRATT015416.2	23.914	47.8279	0	0	#NAME?	0.00933557	0.490013	Down	3.44201	4.25077e-30	2:187690133:187690421:+	31191165	1
NONRATT015437.2	24.5881	0	49.1763	Inf	Inf	0.00841638	0.464287	Up	8.20885e-16	1.26772	2:188388180:188389263:+	31208699	1
NONRATT015452.2	41.1224	6.97491	75.2698	10.7915	3.43182	0.0449153	1	Up	0.0536271	0.814346	2:188753269:188757084:+	31218916	4
NONRATT015468.2	15.9426	31.8853	0	0	#NAME?	0.0309318	0.919909	Down	1.14322	2.90386e-08	2:189430047:189438081:+	31231221	4
NONRATT015583.2	73.1944	18.9319	127.457	6.73239	2.75112	0.0440838	1	Up	0.308674	2.74043	2:198362111:198363401:+	31301961	1
NONRATT015584.2	4261.1	743.326	7778.88	10.465	3.3875	0.00021056	0.0365672	Up	25.7926	360.33	2:198390146:198390743:+	31302558	1
NONRATT015585.2	2805	570.946	5039.06	8.82581	3.14173	0.000374185	0.0584851	Up	17.6736	207.99	2:198418649:198419319:+	31303228	1
NONRATT015614.2	420.381	731.369	109.392	0.149572	-2.74109	0.0034179	0.286486	Down	24.6816	4.94717	2:200480172:200480786:+	31323369	1
NONRATT015740.2	39.1403	0	78.2806	Inf	Inf	0.00129799	0.154735	Up	2.57898e-05	4.76511	2:222069916:222165728:+	31399744	4
NONRATT015794.2	17.563	0	35.1259	Inf	Inf	0.0237761	0.829923	Up	6.62393e-09	1.64856	2:240648107:240654800:+	31441615	3
NONRATT015837.2	158.568	0	317.137	Inf	Inf	7.77852e-08	6.07891e-05	Up	0.00199634	22.3412	2:250601084:250621284:+	31469407	3
NONRATT015858.2	19.0683	0	38.1367	Inf	Inf	0.0188005	0.722585	Up	0.0128469	1.43214	2:251818419:251824227:+	31482733	3
NONRATT015905.2	124.948	0	249.896	Inf	Inf	6.17887e-07	0.000289727	Up	0.000161388	2.89669	2:264825240:264833283:+	31525367	4
NONRATT016045.2	22.0791	0	44.1583	Inf	Inf	0.0119656	0.562942	Up	1.29178e-07	1.81076	2:30766622:30770548:-	31615659	3
NONRATT016046.2	26.5953	0	53.1907	Inf	Inf	0.00641421	0.411218	Up	0	1.88266	2:30782133:30782910:-	31616436	1
NONRATT016047.2	323.148	2.98925	643.306	215.207	7.74958	4.16388e-09	5.85733e-06	Up	0.0897943	27.4158	2:30783113:30783762:-	31617085	1
NONRATT016080.2	34.8889	65.7634	4.01439	0.0610429	-4.03403	0.0325112	0.954772	Down	5.1787	0.394541	2:37619765:37854758:-	31642625	2
NONRATT016221.2	14.5522	0	29.1043	Inf	Inf	0.0383545	1	Up	8.75106e-30	0.601837	2:88384411:88389037:-	31730649	4
NONRATT016343.2	260.355	21.9211	498.788	22.7537	4.50803	4.67093e-05	0.0111366	Up	0.41576	12.5561	2:123274271:123275369:-	31814324	1
NONRATT016429.2	90.3058	4.98208	175.63	35.2523	5.13964	0.000550683	0.0790456	Up	0.110543	5.21044	2:152785959:152788350:-	31863416	2
NONRATT016618.2	74.7312	149.462	0	0	#NAME?	3.11076e-05	0.00875182	Down	3.64652	8.59606e-06	2:189889361:189892175:-	31971670	2
NONRATT016723.2	63.7706	127.541	0	0	#NAME?	8.94146e-05	0.0174694	Down	7.50801	0.00043017	2:204699083:204699434:-	32036588	1
NONRATT016756.2	21.4229	42.8459	0	0	#NAME?	0.0133006	0.589916	Down	1.52145	4.27711e-13	2:209317002:209317580:-	32057974	1
NONRATT016763.2	277.652	95.6559	459.648	4.80522	2.2646	0.020677	0.761423	Up	2.58172	16.6266	2:210761304:210766509:-	32064828	4
NONRATT016766.2	87.76	154.444	21.0755	0.13646	-2.87345	0.0274976	0.881112	Down	7.95554	1.42031	2:210780484:210782791:-	32065230	6
NONRATT016834.2	91.3274	0	182.655	Inf	Inf	7.18028e-06	0.00258987	Up	6.39453e-13	6.10677	2:226689441:226691502:-	32114255	2
NONRATT016849.2	18.5666	0	37.1331	Inf	Inf	0.0203229	0.754307	Up	9.78338e-13	1.94657	2:227718790:227719470:-	32123525	2
NONRATT017032.2	13.0468	0	26.0935	Inf	Inf	0.0490969	1	Up	0	2.68524	20:3162887:3163445:+	32234975	2
NONRATT017038.2	471.848	95.6559	848.04	8.86553	3.14821	0.000809087	0.107372	Up	1.34464	15.8164	20:3278621:3280103:+	32240007	1
NONRATT017172.2	408.85	171.383	646.317	3.77117	1.91501	0.035357	0.988802	Up	3.82442	19.2445	20:6357940:6358869:+	32303718	1
NONRATT017258.2	84.2699	8.96774	159.572	17.794	4.15332	0.00342145	0.286486	Up	0.786539	18.6519	20:11060578:11124470:+	32366702	3
NONRATT017411.2	34.3907	64.767	4.01439	0.061982	-4.01201	0.0341005	0.978963	Down	2.43406	0.225055	20:38945267:38947081:+	32462112	3
NONRATT017478.2	19.4301	38.8602	0	0	#NAME?	0.017952	0.705393	Down	2.85987	1.78849e-45	20:55253731:55265362:+	32496474	3
NONRATT017519.2	269.763	56.7957	482.73	8.49942	3.08736	0.0024634	0.237347	Up	1.30404	14.8739	20:3403204:3404101:-	32520410	1
NONRATT017592.2	40.1259	4.98208	75.2698	15.1081	3.91725	0.027842	0.882102	Up	0.117119	2.53866	20:5490792:5499000:-	32551141	3
NONRATT017649.2	35.6277	0	71.2554	Inf	Inf	0.00199119	0.212198	Up	3.67836e-07	2.54268	20:10668735:10669511:-	32577515	1
NONRATT017723.2	194.301	388.602	0	0	#NAME?	1.19426e-08	1.29229e-05	Down	3.62645	2.1379e-06	20:20638565:20640785:-	32624510	1
NONRATT017766.2	17.0612	0	34.1223	Inf	Inf	0.0257245	0.856064	Up	6.03258e-12	2.84175	20:33487635:33488954:-	32655459	2
NONRATT017864.2	75.7276	151.455	0	0	#NAME?	2.83787e-05	0.00814701	Down	8.06685	8.68569e-06	3:2299330:2299720:+	32703333	1
NONRATT017993.2	46.6529	3.98566	89.3202	22.4104	4.48609	0.0108586	0.532222	Up	0.225457	6.8874	3:8633304:8635344:+	32786087	4
NONRATT018086.2	30.8889	61.7778	0	0	#NAME?	0.00367933	0.294075	Down	4.33877	2.35628e-27	3:20661146:20661440:+	32840820	1
NONRATT018236.2	21.5773	0	43.1547	Inf	Inf	0.0128708	0.580302	Up	1.38429e-30	4.76385	3:57297493:57299097:+	32924877	2
NONRATT018273.2	477.947	213.233	742.662	3.48287	1.80028	0.0428793	1	Up	2.9413	13.6645	3:62484022:62488055:+	32953208	8
NONRATT018276.2	2089.72	910.724	3268.72	3.58914	1.84364	0.0269008	0.875958	Up	20.314	97.2995	3:62486959:62488068:+	32958454	3
NONRATT018439.2	108.288	27.8996	188.676	6.76268	2.7576	0.0244061	0.839543	Up	0.778575	6.93815	3:101185741:101190869:+	33065761	3
NONRATT018464.2	15.4444	30.8889	0	0	#NAME?	0.0334801	0.965091	Down	0.9228	0	3:107788262:107788965:+	33078827	1
NONRATT018485.2	548.38	23.914	1072.85	44.8627	5.48744	1.52498e-07	0.000107259	Up	0.36389	21.3687	3:111439421:111452357:+	33097522	6
NONRATT018517.2	26.5953	0	53.1907	Inf	Inf	0.00641421	0.411218	Up	8.27211e-15	3.10944	3:113383824:113384293:+	33120102	1
NONRATT018551.2	277.601	109.606	445.597	4.06546	2.02342	0.0369821	1	Up	1.24726	6.7819	3:117524024:117526207:+	33137476	3
NONRATT018552.2	72.259	0	144.518	Inf	Inf	3.83955e-05	0.0101907	Up	5.36738e-24	9.26944	3:117524577:117525446:+	33137906	2
NONRATT018572.2	48.6422	8.96774	88.3166	9.84825	3.29987	0.0397852	1	Up	0.183507	2.49153	3:119677605:119679930:+	33151379	2
NONRATT018586.2	171.077	9.96416	332.191	33.3386	5.05912	5.34751e-05	0.0121328	Up	0.237991	11.0501	3:121795297:121796128:-	33874255	1
NONRATT018642.2	25.4086	50.8172	0	0	#NAME?	0.00761146	0.449976	Down	1.42754	1.27149e-06	3:126345136:126345878:+	33199387	1
NONRATT018732.2	50.144	9.96416	90.3238	9.06487	3.18029	0.0438595	1	Up	0.598177	7.42988	3:147713900:147743513:+	33252386	4
NONRATT018750.2	19.5701	0	39.1403	Inf	Inf	0.0174017	0.695424	Up	1.47086e-10	1.18043	3:148215581:148216710:+	33267054	2
NONRATT018895.2	41.6242	6.97491	76.2734	10.9354	3.45093	0.0431228	1	Up	0.275914	3.78482	3:163814944:163817911:+	33364893	5
NONRATT018974.2	86.2689	150.459	22.0791	0.146745	-2.76861	0.0336255	0.9673	Down	4.78241	0.957063	3:176690571:176692268:+	33419562	5
NONRATT019015.2	115.833	22.9176	208.748	9.10866	3.18724	0.00961059	0.499963	Up	1.70254	20.7387	3:1260420:1260699:-	33442659	1
NONRATT019017.2	60.8065	114.588	7.02518	0.0613083	-4.02777	0.0098228	0.506144	Down	2.23126	0.182901	3:1698175:1949484:-	33444417	4
NONRATT019387.2	29.8925	59.7849	0	0	#NAME?	0.00418924	0.322022	Down	0.789263	0	3:60726712:60795951:-	33675993	13
NONRATT019458.2	17.4373	34.8745	0	0	#NAME?	0.0244695	0.839543	Down	2.94069	1.67173e-07	3:80539238:80539566:-	33717516	2
NONRATT019484.2	84.1971	168.394	0	0	#NAME?	1.33597e-05	0.0043705	Down	6.54741	0	3:82324818:82325645:-	33733393	2
NONRATT019511.2	33.6061	3.98566	63.2266	15.8635	3.98764	0.0363022	1	Up	0.072846	1.47704	3:92225423:92242573:-	33751243	2
NONRATT019549.2	23.914	47.8279	0	0	#NAME?	0.00933557	0.490013	Down	1.61092	5.02616e-28	3:96025395:96040772:-	33783169	4
NONRATT019591.2	392.438	687.527	97.3489	0.141593	-2.82018	0.00294516	0.265574	Down	9.68108	1.8294	3:110303514:110304986:-	33811049	1
NONRATT019709.2	41.3656	78.7168	4.01439	0.0509979	-4.29342	0.0177425	0.705038	Down	3.31182	0.244394	3:124246782:124247275:-	33896342	1
NONRATT019734.2	658.24	311.878	1004.6	3.22113	1.68757	0.0494551	1	Up	8.79483	37.852	3:138091059:138093707:-	33918280	2
NONRATT019847.2	97.7062	179.355	16.0576	0.0895296	-3.48149	0.00772589	0.452834	Down	5.69356	0.699834	3:150875292:150909653:-	33992782	3
NONRATT019853.2	136.509	273.018	0	0	#NAME?	3.00595e-07	0.000176186	Down	13.6027	1.21771e-12	3:151248289:151258581:-	33997401	4
NONRATT019858.2	37.1116	5.97849	68.2446	11.415	3.51286	0.0486226	1	Up	0.11781	1.77009	3:153502894:153520736:+	33314902	2
NONRATT019887.2	37.1331	0	74.2662	Inf	Inf	0.00165447	0.186188	Up	9.78439e-11	2.53848	3:154807033:154812902:+	33321586	4
NONRATT019964.2	15.4444	30.8889	0	0	#NAME?	0.0334801	0.965091	Down	0.939056	2.78815e-14	3:161814384:161816991:-	34053185	2
NONRATT019992.2	524.03	236.15	811.91	3.43811	1.78161	0.0428019	1	Up	1.67619	7.68267	3:164039727:164042648:-	34073336	1
NONRATT020161.2	37.3764	71.7419	3.01079	0.041967	-4.5746	0.0170226	0.688096	Down	1.25114	0.0613966	4:10701208:10702390:+	34185118	1
NONRATT020248.2	222.499	361.699	83.2986	0.230298	-2.11843	0.0367285	1	Down	13.3562	4.08635	4:39517647:39519885:+	34236078	3
NONRATT020361.2	34.3763	68.7527	0	0	#NAME?	0.00235883	0.228839	Down	4.9189	6.19313e-26	4:62782870:62790022:+	34306960	3
NONRATT020422.2	18.0648	0	36.1295	Inf	Inf	0.0219783	0.788697	Up	2.61949e-19	1.57895	4:77211866:77248293:+	34357273	3
NONRATT020444.2	32.6061	2.98925	62.223	20.8156	4.37959	0.0271639	0.88045	Up	0.153074	4.73753	4:78240393:78255040:+	34370475	3
NONRATT020472.2	22.0791	0	44.1583	Inf	Inf	0.0119656	0.562942	Up	0.00122314	3.00998	4:82793862:82801540:+	34386073	3
NONRATT020551.2	15.5558	0	31.1115	Inf	Inf	0.0326128	0.955758	Up	1.30928e-31	2.74166	4:99776766:99778060:+	34441024	2
NONRATT020555.2	14.5522	0	29.1043	Inf	Inf	0.0383545	1	Up	2.07211e-07	1.05227	4:99937573:99989486:+	34444222	3
NONRATT020581.2	21.9211	43.8423	0	0	#NAME?	0.0123692	0.566766	Down	1.49111	0.00287813	4:104669958:104670567:+	34457950	1
NONRATT020673.2	36.1295	0	72.259	Inf	Inf	0.00187137	0.200951	Up	3.27297e-14	1.7066	4:118748702:118767246:+	34518364	8
NONRATT020706.2	28.1007	0	56.2015	Inf	Inf	0.00524423	0.364322	Up	1.19063e-17	2.04791	4:120843498:120852126:+	34541335	7
NONRATT020814.2	25.4086	50.8172	0	0	#NAME?	0.00761146	0.449976	Down	2.84436	0.0271026	4:162941706:162942462:+	34688317	2
NONRATT020816.2	66.3047	120.566	12.0432	0.0998884	-3.32354	0.022145	0.792657	Down	4.84476	0.634791	4:163162284:163170470:+	34689513	3
NONRATT020850.2	50.8172	101.634	0	0	#NAME?	0.00034846	0.0557022	Down	8.00654	6.03685e-15	4:140895582:140901178:+	34578612	3
NONRATT020860.2	70.7536	0	141.507	Inf	Inf	4.42903e-05	0.0111256	Up	2.73635e-05	2.3122	4:152966561:152968248:+	34630566	1
NONRATT021007.2	1387.63	651.656	2123.61	3.25879	1.70434	0.039945	1	Up	26.7371	116.265	4:176040917:176440638:+	34731828	2
NONRATT021115.2	183.024	36.8674	329.18	8.92876	3.15846	0.00425289	0.323211	Up	0.543826	6.56746	4:7818642:7822858:-	34806638	4
NONRATT021123.2	16.4409	32.8817	0	0	#NAME?	0.0286053	0.888281	Down	0.827549	3.27849e-28	4:8238850:8255485:-	34814900	2
NONRATT021146.2	101.728	177.362	26.0935	0.14712	-2.76493	0.026434	0.867507	Down	4.34062	0.863865	4:15408101:15409474:-	34828793	2
NONRATT021218.2	188.47	335.792	41.1475	0.122539	-3.02869	0.00550626	0.373338	Down	7.03114	1.14217	4:30311802:30316551:-	34880917	2
NONRATT021240.2	14.0504	0	28.1007	Inf	Inf	0.0416343	1	Up	3.14711e-25	1.09117	4:34740520:34779792:-	34901330	6
NONRATT021258.2	26.9104	51.8136	2.00719	0.0387388	-4.69008	0.0317058	0.937215	Down	1.78604	0.0963373	4:48879767:48927622:-	34913388	6
NONRATT021420.2	19.9283	39.8566	0	0	#NAME?	0.0166356	0.674387	Down	1.02649	6.1815e-14	4:81235167:81236469:-	35017675	2
NONRATT021483.2	14.0504	0	28.1007	Inf	Inf	0.0416343	1	Up	2.09836e-15	1.08882	4:99739878:99746525:-	35073514	4
NONRATT021555.2	27.0971	0	54.1943	Inf	Inf	0.00599708	0.397929	Up	2.82016e-60	2.14424	4:116915337:116916686:-	35124269	2
NONRATT021559.2	15.9426	31.8853	0	0	#NAME?	0.0309318	0.919909	Down	2.73945	3.54028e-55	4:117068076:117111508:-	35126165	4
NONRATT021609.2	50.6673	3.98566	97.3489	24.4248	4.61027	0.00761316	0.449976	Up	0.287793	8.79939	4:120825703:120826314:-	35163828	2
NONRATT021751.2	29.5953	2.98925	56.2015	18.8012	4.23275	0.037117	1	Up	0.159434	3.73328	4:163822942:163946729:-	35356009	3
NONRATT021811.2	19.0683	0	38.1367	Inf	Inf	0.0188005	0.722585	Up	1.25476e-07	1.43283	4:155028566:155029297:-	35283712	1
NONRATT021828.2	262.709	64.767	460.651	7.11244	2.83034	0.00517684	0.364322	Up	2.04348	19.5316	4:156159801:156160453:-	35299154	1
NONRATT021856.2	180.54	29.8925	331.187	11.0793	3.46979	0.00205888	0.213633	Up	1.5783	23.667	4:157701316:157705764:-	35314088	3
NONRATT021942.2	1742.31	2766.05	718.576	0.259784	-1.94461	0.0197934	0.746472	Down	76.1534	26.3772	4:176158450:176163313:-	35389764	3
NONRATT021953.2	367.875	680.552	55.1979	0.0811075	-3.62402	0.000270039	0.0452219	Down	5.70661	0.618028	4:176805444:176807916:-	35397840	1
NONRATT022139.2	29.6061	0	59.2122	Inf	Inf	0.00429661	0.323211	Up	0.000134998	1.73696	5:35865680:35880718:+	35520617	12
NONRATT022152.2	146.446	21.9211	270.971	12.3612	3.62775	0.00231379	0.228839	Up	0.349309	5.64657	5:38844525:38850520:+	35534359	5
NONRATT022155.2	227.183	454.365	0	0	#NAME?	2.56001e-09	4.50145e-06	Down	3.91099	0	5:39251399:39256667:+	35536769	2
NONRATT022275.2	91.234	25.9068	156.561	6.04325	2.59532	0.0413486	1	Up	0.762655	6.24117	5:69844144:69849113:+	35616690	3
NONRATT022384.2	545.428	842.968	247.889	0.294067	-1.76579	0.0437109	1	Down	24.6712	9.69649	5:112836483:112837191:+	35694325	1
NONRATT022403.2	15.054	0	30.1079	Inf	Inf	0.0353531	0.988802	Up	3.12192e-18	1.25199	5:117131088:117138909:+	35708464	3
NONRATT022510.2	23.0827	0	46.1655	Inf	Inf	0.0103711	0.513699	Up	5.37717e-12	1.65637	5:134120226:134120993:+	35769466	1
NONRATT022516.2	21.9211	43.8423	0	0	#NAME?	0.0123692	0.566766	Down	0.52277	3.45824e-15	5:134729162:134730886:+	35773769	1
NONRATT022568.2	33.6169	0.996416	66.2374	66.4757	6.05476	0.00756059	0.449976	Up	0.0252167	2.73433	5:138188803:138189470:+	35807935	1
NONRATT022600.2	136.342	40.853	231.831	5.67476	2.50456	0.0287256	0.890051	Up	0.98754	7.43552	5:140990829:140994729:+	35827958	6
NONRATT022650.2	16.0576	0	32.1151	Inf	Inf	0.0301165	0.913035	Up	2.45557e-12	1.13289	5:146924587:146930417:+	35864866	4
NONRATT022682.2	21.9211	43.8423	0	0	#NAME?	0.0123692	0.566766	Down	1.62267	4.73283e-26	5:150001280:150014124:+	35889084	4
NONRATT022729.2	17.9355	35.871	0	0	#NAME?	0.0226343	0.805409	Down	0.480614	0.000303945	5:153261443:153264030:+	35917273	3
NONRATT022831.2	23.0791	0.996416	45.1619	45.3243	5.50221	0.027048	0.878715	Up	0.0289432	1.27912	5:160317934:160321075:+	35976102	3
NONRATT022962.2	70.7141	10.9606	130.468	11.9034	3.5733	0.0133357	0.589916	Up	0.0980666	1.56495	5:173556881:173561022:+	36053934	2
NONRATT022970.2	21.4229	42.8459	0	0	#NAME?	0.0133006	0.589916	Down	2.93743	2.34394e-09	5:1260964:1261265:-	36058643	1
NONRATT023004.2	28.9068	54.8029	3.01079	0.0549386	-4.18604	0.0403774	1	Down	1.25797	0.0995444	5:9423651:9429717:-	36078118	4
NONRATT023016.2	19.5701	0	39.1403	Inf	Inf	0.0174017	0.695424	Up	2.69003e-07	2.56732	5:13035710:13038797:-	36083582	3
NONRATT023017.2	19.9283	39.8566	0	0	#NAME?	0.0166356	0.674387	Down	2.66376	8.5586e-29	5:13065143:13065457:-	36083896	1
NONRATT023026.2	21.0755	0	42.1511	Inf	Inf	0.0138597	0.599889	Up	1.88247e-22	1.35143	5:16383564:16392558:-	36088689	5
NONRATT023136.2	20.9247	41.8495	0	0	#NAME?	0.0143176	0.610318	Down	2.28508	0.00102368	5:50556927:50638147:-	36165635	2
NONRATT023155.2	15.054	0	30.1079	Inf	Inf	0.0353531	0.988802	Up	0	0.528421	5:57777763:57779315:-	36176538	1
NONRATT023164.2	14.448	28.8961	0	0	#NAME?	0.0393298	1	Down	1.05435	4.90978e-23	5:58159062:58160917:-	36181551	3
NONRATT023201.2	76.2734	0	152.547	Inf	Inf	2.64372e-05	0.00774776	Up	4.32427e-19	10.6178	5:59533735:59553426:-	36204354	3
NONRATT023249.2	40.3692	76.724	4.01439	0.0523225	-4.25643	0.0194397	0.735103	Down	3.39061	0.229372	5:73986136:73986607:-	36238821	1
NONRATT023284.2	18.4337	36.8674	0	0	#NAME?	0.0209423	0.767175	Down	1.03288	5.28728e-32	5:76681887:76682624:-	36256049	1
NONRATT023285.2	18.5666	0	37.1331	Inf	Inf	0.0203229	0.754307	Up	0.000194497	2.77511	5:76717797:76756125:-	36256417	3
NONRATT023334.2	15.9426	31.8853	0	0	#NAME?	0.0309318	0.919909	Down	0.225651	0	5:92862228:92865113:-	36288390	1
NONRATT023335.2	68.7527	137.505	0	0	#NAME?	5.47513e-05	0.0122252	Down	7.71623	0	5:92868535:92871528:-	36288759	2
NONRATT023355.2	41.6421	1.99283	81.2914	40.7919	5.35021	0.00643122	0.411218	Up	0.0371639	2.27525	5:101561714:101562705:-	36305323	1
NONRATT023409.2	61.7212	0	123.442	Inf	Inf	0.000107952	0.0205211	Up	1.54464e-10	8.21909	5:117661911:117673435:-	36346735	3
NONRATT023579.2	20.5737	0	41.1475	Inf	Inf	0.0149396	0.62738	Up	1.43692e-12	1.7087	5:141040646:141041995:-	36459059	2
NONRATT023698.2	14.0504	0	28.1007	Inf	Inf	0.0416343	1	Up	9.76053e-22	1.05655	5:152196085:152197411:-	36530488	2
NONRATT023801.2	25.9068	51.8136	0	0	#NAME?	0.00711667	0.435262	Down	0.437971	2.14639e-08	5:160230952:160233411:-	36603084	1
NONRATT023829.2	15.054	0	30.1079	Inf	Inf	0.0353531	0.988802	Up	1.33132e-23	0.933701	5:164318093:164320462:-	36623627	3
NONRATT023842.2	16.5594	0	33.1187	Inf	Inf	0.0278338	0.882102	Up	7.53485e-15	1.01176	5:164886777:164887688:-	36632929	1
NONRATT024058.2	21.4229	42.8459	0	0	#NAME?	0.0133006	0.589916	Down	0.910944	4.90529e-12	6:24079974:24083234:+	36773224	2
NONRATT024111.2	71.7419	143.484	0	0	#NAME?	4.11409e-05	0.0107172	Down	7.19856	5.02753e-06	6:28175338:28177234:+	36808075	2
NONRATT024151.2	112.847	15.9426	209.752	13.1566	3.71772	0.00356344	0.289751	Up	1.07123	18.5017	6:38755530:38755844:+	36834238	1
NONRATT024227.2	219.493	81.7061	357.281	4.37276	2.12854	0.0363908	1	Up	1.79932	10.437	6:52284358:52285304:+	36878939	1
NONRATT024248.2	43.871	79.7132	8.02878	0.100721	-3.31157	0.0464494	1	Down	6.00295	0.81291	6:59406538:59406814:+	36894232	1
NONRATT024282.2	20.9247	41.8495	0	0	#NAME?	0.0143176	0.610318	Down	1.93554	1.76755e-19	6:75533322:75533770:+	36914486	1
NONRATT024308.2	97.2699	21.9211	172.619	7.87453	2.97719	0.0193876	0.735103	Up	1.45072	15.0613	6:80220515:80228218:+	36929227	4
NONRATT024312.2	13.9498	27.8996	0	0	#NAME?	0.042665	1	Down	1.52593	1.64743e-17	6:80283094:80285494:+	36930768	2
NONRATT024420.2	94.2582	161.419	27.0971	0.167868	-2.5746	0.0410068	1	Down	12.9374	2.91589	6:99817459:99831463:+	36996876	3
NONRATT024452.2	40.1367	1.99283	78.2806	39.2811	5.29576	0.00749752	0.449976	Up	0.0446883	2.38538	6:104611047:104613331:+	37022995	4
NONRATT024543.2	226.085	62.7742	389.396	6.20312	2.63299	0.0107506	0.528773	Up	1.70441	14.1801	6:117521843:117522602:+	37086751	1
NONRATT024588.2	24.4122	48.8244	0	0	#NAME?	0.00871695	0.473441	Down	1.41838	7.47667e-18	6:127328965:127332246:+	37108974	3
NONRATT024745.2	72.7608	0	145.522	Inf	Inf	3.66232e-05	0.00990729	Up	0.00523168	2.93395	6:963901:988572:-	37226574	5
NONRATT024763.2	90.234	24.9104	155.558	6.24469	2.64263	0.0387942	1	Up	0.612341	5.02098	6:2880651:2886435:-	37240427	8
NONRATT024811.2	13.5486	0	27.0971	Inf	Inf	0.0452097	1	Up	0.00325272	0.745414	6:11067701:11080366:-	37269908	3
NONRATT024835.2	30.1079	0	60.2158	Inf	Inf	0.00402295	0.312657	Up	1.01967e-08	1.93713	6:23434627:23443880:-	37287084	7
NONRATT024996.2	69.2482	0	138.496	Inf	Inf	5.11719e-05	0.0119972	Up	4.13837e-07	3.65302	6:72377376:72378501:-	37382829	2
NONRATT025013.2	65.7356	0	131.471	Inf	Inf	7.21292e-05	0.0144949	Up	7.26062e-05	4.91974	6:75760972:75761798:-	37394593	2
NONRATT025102.2	375.803	708.451	43.1547	0.0609141	-4.03708	6.78262e-05	0.0138277	Down	17.4583	1.41468	6:95387812:95389260:-	37447080	2
NONRATT025145.2	19.5701	0	39.1403	Inf	Inf	0.0174017	0.695424	Up	3.35461e-05	1.64633	6:102076811:102078091:-	37475339	2
NONRATT025172.2	13.5486	0	27.0971	Inf	Inf	0.0452097	1	Up	2.38006e-20	1.07429	6:105303406:105313050:-	37495994	6
NONRATT025239.2	23.9212	45.8351	2.00719	0.0437916	-4.5132	0.044577	1	Down	2.0768	0.10928	6:110166093:110166555:-	37521167	1
NONRATT025290.2	129.179	218.215	40.1439	0.183965	-2.4425	0.0347568	0.988802	Down	6.25481	1.53101	6:125801515:125812628:-	37555816	4
NONRATT025311.2	11772.7	20454.4	3091.08	0.15112	-2.72623	0.0064287	0.411218	Down	230.668	46.5053	6:127993913:127995751:-	37568705	1
NONRATT025352.2	30.6097	0	61.2194	Inf	Inf	0.0037679	0.299452	Up	1.17979e-09	4.01334	6:136005315:136007618:+	37192685	4
NONRATT025398.2	14.9462	29.8925	0	0	#NAME?	0.0362738	1	Down	1.76051	5.20051e-36	6:140110112:140110550:-	37619623	2
NONRATT025409.2	16.4409	32.8817	0	0	#NAME?	0.0286053	0.888281	Down	1.75247	7.24161e-13	6:141290918:141291386:-	37621802	2
NONRATT025503.2	27.0971	0	54.1943	Inf	Inf	0.00599708	0.397929	Up	1.17284e-13	0.95729	7:11089740:11091582:+	37676741	2
NONRATT025573.2	79.2581	146.473	12.0432	0.082221	-3.60435	0.00989714	0.507621	Down	7.24425	0.825542	7:12314912:12315331:+	37717615	1
NONRATT025675.2	15.4444	30.8889	0	0	#NAME?	0.0334801	0.965091	Down	0.359665	3.94866e-12	7:26302586:26306072:+	37781476	3
NONRATT025796.2	476.138	158.43	793.845	5.0107	2.32501	0.0102956	0.513699	Up	1.42406	9.54123	7:54233226:54237880:+	37859994	6
NONRATT025882.2	79.2904	137.505	21.0755	0.153271	-2.70585	0.0421274	1	Down	1.86424	0.381121	7:70790910:70805241:+	37913839	7
NONRATT025884.2	86.1899	172.38	0	0	#NAME?	1.12666e-05	0.00377351	Down	8.7185	4.91704e-29	7:70814414:70815270:+	37914249	4
NONRATT025888.2	19.4301	38.8602	0	0	#NAME?	0.017952	0.705393	Down	2.58163	3.13975e-14	7:71789891:71790207:+	37915938	1
NONRATT025945.2	71.7778	133.52	10.036	0.0751647	-3.7338	0.0101094	0.50973	Down	5.8527	0.56904	7:83348770:83356068:+	37945542	4
NONRATT026028.2	36.8674	73.7348	0	0	#NAME?	0.00173297	0.190136	Down	2.66335	0.000264893	7:116389174:116389751:+	37996906	1
NONRATT026048.2	27.0971	0	54.1943	Inf	Inf	0.00599708	0.397929	Up	0	1.41636	7:117409566:117411952:+	38011921	7
NONRATT026051.2	64.3083	117.577	11.0396	0.0938922	-3.41285	0.0206311	0.761423	Down	3.69433	0.457767	7:117417646:117418895:+	38013867	2
NONRATT026053.2	15.4444	30.8889	0	0	#NAME?	0.0334801	0.965091	Down	1.1051	2.39685e-19	7:117417693:117419039:+	38016246	2
NONRATT026075.2	73.7491	143.484	4.01439	0.027978	-5.15956	0.00115263	0.147401	Down	4.4461	0.146526	7:117764319:117765902:+	38027008	4
NONRATT026180.2	17.563	0	35.1259	Inf	Inf	0.0237761	0.829923	Up	2.3114e-15	0.688902	7:125607857:125609269:+	38098615	1
NONRATT026216.2	109.869	6.97491	212.763	30.504	4.93093	0.000379015	0.0585891	Up	0.112116	4.4082	7:129862033:129863445:+	38123375	2
NONRATT026333.2	37.6313	0.996416	74.2662	74.5334	6.21981	0.00478487	0.346952	Up	0.0228106	3.50966	7:143810035:143814409:+	38279358	4
NONRATT026357.2	94.2843	14.9462	173.622	11.6165	3.5381	0.00751821	0.449976	Up	0.598655	9.1027	7:144867555:144869154:+	38292167	3
NONRATT026407.2	203.269	406.538	0	0	#NAME?	7.70547e-09	9.03273e-06	Down	19.8188	7.82574e-11	7:3340847:3341953:-	38318871	2
NONRATT026523.2	35.8781	69.7491	2.00719	0.0287774	-5.11892	0.0118537	0.562942	Down	2.1342	0.079726	7:12516358:12517202:-	38390188	3
NONRATT026632.2	19.9283	39.8566	0	0	#NAME?	0.0166356	0.674387	Down	1.03672	1.41526e-09	7:27226572:27229781:-	38462547	5
NONRATT026672.2	51.6709	3.98566	99.3561	24.9284	4.63972	0.00697289	0.430209	Up	0.293141	10.1428	7:31852648:31858782:-	38488277	3
NONRATT026697.2	64.2195	2.98925	125.45	41.967	5.39118	0.00143351	0.166655	Up	0.0808678	5.42255	7:36646009:36648580:-	38502980	4
NONRATT026698.2	54.8172	105.62	4.01439	0.0380078	-4.71756	0.00539988	0.370537	Down	2.27841	0.105881	7:36646015:36647220:-	38503943	2
NONRATT026699.2	85.2402	157.434	13.0468	0.0828715	-3.59298	0.0085664	0.470439	Down	12.55	1.35298	7:36646315:36648129:-	38504203	3
NONRATT026764.2	14.448	28.8961	0	0	#NAME?	0.0393298	1	Down	0.747921	0	7:59938132:59938925:-	38544138	1
NONRATT026799.2	30.3907	60.7813	0	0	#NAME?	0.00392541	0.308485	Down	1.54242	5.28504e-12	7:64330632:64341199:-	38570212	4
NONRATT026844.2	14.448	28.8961	0	0	#NAME?	0.0393298	1	Down	1.56786	1.42776e-11	7:70916400:70926613:-	38602684	3
NONRATT026892.2	14.448	28.8961	0	0	#NAME?	0.0393298	1	Down	1.30376	5.23355e-16	7:77371898:77372360:-	38634000	1
NONRATT026924.2	428.875	184.337	673.414	3.65317	1.86915	0.0384547	1	Up	2.19501	10.708	7:91511754:91513493:-	38649770	1
NONRATT026936.2	359.922	102.631	617.212	6.01391	2.5883	0.00648141	0.412552	Up	1.51522	12.1161	7:95395410:95396818:-	38657164	1
NONRATT026945.2	386.609	773.218	0	0	#NAME?	9.87694e-12	6.94695e-08	Down	30.6021	0	7:97738957:97743202:-	38662393	2
NONRATT026974.2	14.448	28.8961	0	0	#NAME?	0.0393298	1	Down	0.791554	2.39862e-24	7:99627905:99628654:-	38679672	1
NONRATT027166.2	104.663	198.287	11.0396	0.0556748	-4.16683	0.00182558	0.197542	Down	5.96791	0.442159	7:123599263:123600050:-	38788469	2
NONRATT027209.2	14.9462	29.8925	0	0	#NAME?	0.0362738	1	Down	0.984444	2.54614e-10	7:126687409:126688030:-	38823314	1
NONRATT027246.2	34.8817	67.7563	2.00719	0.0296238	-5.0771	0.0131797	0.589916	Down	2.01269	0.075104	7:130449049:130450243:-	38843508	4
NONRATT027286.2	130.969	0	261.939	Inf	Inf	4.16422e-07	0.000209208	Up	0.00122313	11.1443	7:137816789:137856337:-	38869574	8
NONRATT027560.2	39.1223	4.98208	73.2626	14.7052	3.87826	0.0304341	0.919909	Up	0.230943	4.144	8:36430475:36430962:+	39072783	1
NONRATT027567.2	29.1043	0	58.2086	Inf	Inf	0.00459032	0.336313	Up	3.91109e-06	5.0849	8:37143964:37235721:+	39075973	2
NONRATT027621.2	129.534	259.068	0	0	#NAME?	4.69503e-07	0.000227741	Down	5.63914	1.68928e-05	8:48658100:48663015:+	39114639	5
NONRATT027624.2	26.0935	0	52.1871	Inf	Inf	0.00686168	0.425213	Up	9.62e-18	2.74233	8:48663886:48664534:+	39115902	2
NONRATT027677.2	31.6133	0	63.2266	Inf	Inf	0.00330837	0.282054	Up	1.46747e-24	3.58645	8:55179863:55182545:+	39146526	3
NONRATT027810.2	33.1079	2.98925	63.2266	21.1514	4.40268	0.025803	0.856064	Up	0.16418	4.42036	8:71514526:71526227:+	39235522	3
NONRATT027820.2	65.6818	14.9462	116.417	7.78907	2.96145	0.0381186	1	Up	0.289427	2.963	8:72117409:72130836:+	39241889	8
NONRATT027849.2	26.0935	0	52.1871	Inf	Inf	0.00686168	0.425213	Up	3.76241e-07	0.656056	8:76864339:76875889:-	39841003	6
NONRATT027850.2	290.462	21.9211	559.004	25.5007	4.67246	1.99491e-05	0.00610054	Up	0.694135	23.8872	8:76853139:76861155:-	39838794	5
NONRATT027878.2	253.91	0	507.82	Inf	Inf	7.98784e-10	1.88739e-06	Up	0.00100469	30.4245	8:81963660:81968607:+	39292212	2
NONRATT027957.2	28.1007	0	56.2015	Inf	Inf	0.00524423	0.364322	Up	1.34362e-13	2.29607	8:103877710:103878935:+	39340282	2
NONRATT027989.2	13.9498	27.8996	0	0	#NAME?	0.042665	1	Down	0.856826	2.98817e-13	8:111870099:111870781:+	39362343	1
NONRATT028056.2	24.5881	0	49.1763	Inf	Inf	0.00841638	0.464287	Up	0.000290764	2.58569	8:117657840:117659376:+	39397839	4
NONRATT028102.2	44.3405	88.681	0	0	#NAME?	0.000718875	0.0981788	Down	1.23476	2.53087e-09	8:119529894:119531389:+	39423773	1
NONRATT028165.2	38.6241	3.98566	73.2626	18.3815	4.20019	0.0225317	0.804451	Up	0.132496	2.90554	8:128790370:128798539:+	39463268	6
NONRATT028191.2	51.6529	8.96774	94.3382	10.5197	3.39502	0.0318704	0.939655	Up	0.144543	2.03907	8:130085326:130088501:+	39479298	3
NONRATT028212.2	16.0576	0	32.1151	Inf	Inf	0.0301165	0.913035	Up	3.09832e-24	1.7276	8:131845695:131853262:+	39492520	4
NONRATT028302.2	39.1403	0	78.2806	Inf	Inf	0.00129799	0.154735	Up	2.00537e-06	0.725073	8:21511832:21514800:-	39552064	1
NONRATT028317.2	58.2903	116.581	0	0	#NAME?	0.000156594	0.0283749	Down	6.21092	6.0136e-15	8:22125468:22125932:-	39560029	2
NONRATT028335.2	17.0612	0	34.1223	Inf	Inf	0.0257245	0.856064	Up	3.12551e-23	1.97889	8:22780735:22782280:-	39570298	3
NONRATT028353.2	30.1007	1.99283	58.2086	29.209	4.86834	0.021908	0.788697	Up	0.0133931	0.532546	8:23275330:23278375:-	39580897	1
NONRATT028358.2	453.038	23.914	882.162	36.889	5.20512	7.70578e-07	0.000349668	Up	0.234675	11.7446	8:23336438:23339366:-	39584875	2
NONRATT028472.2	32.8817	65.7634	0	0	#NAME?	0.00284866	0.260208	Down	2.32887	1.57466e-08	8:48729690:48731318:-	39661494	4
NONRATT028553.2	23.4158	46.8315	0	0	#NAME?	0.0100043	0.508052	Down	0.589304	3.59296e-08	8:55308760:55310390:-	39712250	1
NONRATT028574.2	15.9426	31.8853	0	0	#NAME?	0.0309318	0.919909	Down	2.80489	7.87284e-30	8:58213280:58213516:-	39729337	1
NONRATT028578.2	50.8172	101.634	0	0	#NAME?	0.00034846	0.0557022	Down	1.27767	0	8:58932576:58935355:-	39733733	2
NONRATT028589.2	68.2904	126.545	10.036	0.0793077	-3.6564	0.0127252	0.577436	Down	3.29102	0.341782	8:59782719:59819366:-	39738146	4
NONRATT028662.2	59.6925	5.97849	113.406	18.9691	4.24558	0.00765762	0.45071	Up	0.17997	4.58758	8:66870070:66874776:-	39773034	4
NONRATT028740.2	26.9032	53.8064	0	0	#NAME?	0.00622647	0.405499	Down	1.21397	2.89671e-13	8:77016901:77020339:+	39260365	4
NONRATT028752.2	520.002	240.136	799.867	3.33089	1.73591	0.0482827	1	Up	6.69801	29.7258	8:72815431:72834142:-	39817332	8
NONRATT028772.2	51.1583	6.97491	95.3417	13.6692	3.77286	0.0202148	0.754307	Up	0.266091	4.56751	8:73190768:73441434:-	39832276	6
NONRATT028800.2	39.8566	79.7132	0	0	#NAME?	0.00120912	0.151863	Down	1.90213	2.68221e-09	8:85388352:85391416:-	39870718	2
NONRATT028801.2	25.0899	0	50.1799	Inf	Inf	0.00785936	0.45685	Up	1.95816e-19	0.804876	8:85390228:85403406:-	39872428	8
NONRATT028806.2	85.7645	11.957	159.572	13.3455	3.73828	0.00657984	0.416931	Up	0.157615	2.89032	8:87041620:87044183:-	39875817	2
NONRATT028819.2	58.6817	7.97132	109.392	13.7232	3.77855	0.0149408	0.62738	Up	0.25254	4.6189	8:90628202:90630621:-	39886716	3
NONRATT028884.2	45.6385	6.97491	84.3022	12.0865	3.59532	0.0312548	0.927554	Up	0.201328	3.27635	8:104327279:104335683:-	39936477	3
NONRATT028908.2	31.3871	62.7742	0	0	#NAME?	0.00344974	0.287145	Down	0.896952	4.75479e-18	8:109482587:109484035:-	39957635	1
NONRATT028940.2	135.833	42.8459	228.82	5.34054	2.41699	0.0342771	0.980033	Up	2.04735	14.5093	8:115134794:115136594:-	39974502	4
NONRATT029217.2	101.19	187.326	15.054	0.0803623	-3.63734	0.00536234	0.369765	Down	2.90746	0.31875	9:17350275:17354890:+	40143058	3
NONRATT029261.2	70.2446	1.99283	138.496	69.4973	6.11889	0.000442244	0.0670511	Up	0.0568435	4.84965	9:23352306:23362525:+	40174344	6
NONRATT029305.2	24.914	48.8244	1.0036	0.0205553	-5.60435	0.0217279	0.787747	Down	1.76801	0.0585008	9:40922306:40922881:+	40199369	1
NONRATT029356.2	23.0827	0	46.1655	Inf	Inf	0.0103711	0.513699	Up	9.03113e-30	3.50909	9:51129723:51130088:+	40226786	1
NONRATT029391.2	31.6133	0	63.2266	Inf	Inf	0.00330837	0.282054	Up	1.35283e-05	1.91907	9:61720588:61742991:+	40246159	7
NONRATT029392.2	41.8495	83.6989	0	0	#NAME?	0.000956892	0.124537	Down	2.54457	4.39458e-12	9:61739631:61742965:+	40246844	3
NONRATT029415.2	39.3584	78.7168	0	0	#NAME?	0.0012829	0.154735	Down	3.08409	3.7531e-20	9:65535246:65554374:+	40259884	3
NONRATT029454.2	19.4301	38.8602	0	0	#NAME?	0.017952	0.705393	Down	0.84396	8.38468e-12	9:69611126:69612091:+	40292839	1
NONRATT029497.2	43.362	81.7061	5.01799	0.0614151	-4.02526	0.0212967	0.774891	Down	3.23489	0.274608	9:81518251:81533017:+	40333074	4
NONRATT029525.2	50.8172	101.634	0	0	#NAME?	0.00034846	0.0557022	Down	5.17053	1.2669e-09	9:82370950:82372091:+	40346020	5
NONRATT029562.2	56.7957	113.591	0	0	#NAME?	0.000183154	0.0326131	Down	5.00601	0	9:85547416:85547886:+	40365445	1
NONRATT029632.2	16.5594	0	33.1187	Inf	Inf	0.0278338	0.882102	Up	3.25672e-12	1.03723	9:94534761:94543239:+	40404040	5
NONRATT029686.2	177.945	53.8064	302.083	5.61425	2.48909	0.0208919	0.767175	Up	2.61776	19.5446	9:100624877:100645746:+	40439739	5
NONRATT029839.2	33.1079	2.98925	63.2266	21.1514	4.40268	0.025803	0.856064	Up	0.013343	0.33074	9:19121670:19158951:-	40527433	4
NONRATT030053.2	24.5881	0	49.1763	Inf	Inf	0.00841638	0.464287	Up	0	4.36282	9:65413110:65413420:-	40664527	1
NONRATT030132.2	68.2303	3.98566	132.475	33.2379	5.05476	0.00174363	0.190136	Up	0.0734971	3.60412	9:78295054:78296068:-	40708677	1
NONRATT030154.2	31.1115	0	62.223	Inf	Inf	0.00353011	0.28871	Up	8.27357e-23	5.67637	9:81233469:81258826:-	40739971	2
NONRATT030253.2	23.5845	0	47.1691	Inf	Inf	0.0096673	0.499963	Up	3.11215e-10	0.717995	9:94569286:94579807:-	40801624	9
NONRATT030261.2	74.7177	13.9498	135.486	9.71236	3.27982	0.0187919	0.722585	Up	0.427443	5.48848	9:95347734:95348418:-	40805269	1
NONRATT030317.2	34.6169	1.99283	67.241	33.7415	5.07645	0.0133798	0.590011	Up	0.060294	2.64582	9:100921568:100922269:-	40841196	1
NONRATT030354.2	123.201	206.258	40.1439	0.194629	-2.3612	0.0429042	1	Down	5.42348	1.41923	9:113300831:113301619:-	40871052	1
NONRATT030361.2	35.3728	70.7455	0	0	#NAME?	0.00208322	0.213633	Down	3.3732	5.60667e-20	9:113875713:113877524:-	40874574	2
NONRATT030449.2	13.4516	26.9032	0	0	#NAME?	0.046296	1	Down	1.85453	1.04744e-26	X:15448892:15451629:+	40930014	3
NONRATT030513.2	21.0755	0	42.1511	Inf	Inf	0.0138597	0.599889	Up	0	5.02072	X:33786688:33786921:+	40978614	1
NONRATT030518.2	15.054	0	30.1079	Inf	Inf	0.0353531	0.988802	Up	2.60697e-13	0.552371	X:37221786:37223310:+	40984950	1
NONRATT030592.2	55.1619	9.96416	100.36	10.0721	3.33229	0.0307151	0.919909	Up	0.567971	7.53124	X:71540963:71544044:+	41020571	2
NONRATT030828.2	31.6133	0	63.2266	Inf	Inf	0.00330837	0.282054	Up	7.53772e-13	0.94757	X:159170676:159172528:+	41172200	1
NONRATT030845.2	16.5594	0	33.1187	Inf	Inf	0.0278338	0.882102	Up	0	3.86609	X:2069240:2069824:-	41180911	2
NONRATT031007.2	23.914	47.8279	0	0	#NAME?	0.00933557	0.490013	Down	2.75959	4.48842e-21	X:77298902:77299261:-	41333136	1
NONRATT031008.2	64.7814	125.548	4.01439	0.0319748	-4.96692	0.0023472	0.228839	Down	4.7815	0.20722	X:56398802:56399346:-	41271287	1
NONRATT031104.2	16.4409	32.8817	0	0	#NAME?	0.0286053	0.888281	Down	1.63245	4.85212e-24	X:79840446:79845352:-	41340710	4
NONRATT031154.2	13.5486	0	27.0971	Inf	Inf	0.0452097	1	Up	2.44542e-23	1.7696	X:106360633:106361061:+	41073025	1
NONRATT031165.2	150.435	28.8961	271.975	9.41218	3.23453	0.00524561	0.364322	Up	0.461251	5.88125	X:107395774:107402500:-	41369910	3
NONRATT031214.2	2939.16	801.118	5077.2	6.33764	2.66395	0.00212616	0.213633	Up	53.2076	450.04	7:140616324:140617702:-	38908444	2
NONRATT031310.2	15.054	0	30.1079	Inf	Inf	0.0353531	0.988802	Up	5.66094e-24	2.16304	X:139392896:139464834:-	41444405	3
NONRATT031323.2	20.5737	0	41.1475	Inf	Inf	0.0149396	0.62738	Up	2.04259e-17	0.865261	X:158698352:158739829:-	41471449	7
NONRATT031410.1	45.6601	0.996416	90.3238	90.6487	6.50221	0.00200922	0.212509	Up	0.0589889	6.78332	1:141675043:141679522:+	41534254	2
NONRATT031415.1	1053.83	1794.54	313.122	0.174486	-2.51882	0.00342004	0.286486	Down	14.2704	3.32783	1:147696655:147700221:+	41538933	2
NONRATT031556.1	207.456	358.71	56.2015	0.156677	-2.67414	0.0110302	0.536893	Down	5.78622	1.20536	1:147156908:147158367:-	41679073	2
NONRATT031959.1	22.5809	0	45.1619	Inf	Inf	0.0111349	0.538264	Up	0.00554428	3.22051	14:24182754:24188263:+	42026969	2
NONRATT032172.1	37.3871	68.7527	6.02158	0.0875833	-3.5132	0.0481284	1	Down	0.376579	0.0406416	16:4439101:4446046:+	42203960	2
NONRATT032185.1	82.2546	150.459	14.0504	0.0933835	-3.42069	0.0123641	0.566766	Down	1.529	0.195589	16:49163528:49167325:+	42215773	2
NONRATT032352.1	44.1367	5.97849	82.295	13.7652	3.78295	0.0268315	0.875729	Up	0.0508152	0.886402	17:47710211:47713383:-	42362576	2
NONRATT032568.1	13.9498	27.8996	0	0	#NAME?	0.042665	1	Down	0.242898	0.00573478	2:39434633:39472017:+	42516813	12
NONRATT033170.1	16.4409	32.8817	0	0	#NAME?	0.0286053	0.888281	Down	1.89723	0	5:25339367:25341042:+	42960156	2
NONRATT033206.1	16.0576	0	32.1151	Inf	Inf	0.0301165	0.913035	Up	0	2.45432	5:133799174:133802097:+	42988492	2
NONRATT033405.1	128.403	15.9426	240.863	15.1081	3.91725	0.00171824	0.190136	Up	0.248073	5.00009	6:114759473:114966751:-	43139544	4
NONRATT033407.1	351.961	83.6989	620.223	7.41017	2.88951	0.00279635	0.2571	Up	0.525366	5.1869	6:114760439:115141057:-	43143919	23
NONRATT033510.1	408.925	707.455	110.396	0.156046	-2.67995	0.0042485	0.323211	Down	3.04079	0.633002	7:2679227:2688967:-	43219299	3
NONRATT033706.1	19.4301	38.8602	0	0	#NAME?	0.017952	0.705393	Down	0.418854	4.38017e-07	8:114037762:114039980:-	43382037	2
TCONS_00001355	11210.8	17927.5	4494.11	0.250682	-1.99607	0.0388538	1	Down	1761.1	588.977	1:243240134:243283685:+	211	2	XLOC_000732	ENSRNOT00000021496	o
TCONS_00001421	46.6673	0	93.3346	Inf	Inf	0.000543861	0.078871	Up	4.66198e-05	2.24432	1:252880956:252900728:+	1148	2	XLOC_000755	ENSRNOT00000054757	o
TCONS_00002160	71.8101	124.552	19.0683	0.153096	-2.7075	0.048431	1	Down	2.62796	0.524329	1:90200795:90251546:-	986	2	XLOC_001123	ENSRNOT00000030186	o
TCONS_00002163	142.511	0	285.022	Inf	Inf	2.01379e-07	0.000128764	Up	3.38964e-10	8.67079	1:90200872:90251548:-	909	2	XLOC_001123	ENSRNOT00000030186	o
TCONS_00002438	68.7922	126.545	11.0396	0.0872385	-3.51889	0.015389	0.640143	Down	9.24546	1.11264	1:147646122:147656439:-	283	2	XLOC_001259		u
TCONS_00005416	29.1043	0	58.2086	Inf	Inf	0.00459032	0.336313	Up	0.00310486	3.16036	10:94901178:94913257:-	513	3	XLOC_002751		u
TCONS_00006154	505.221	24.9104	985.533	39.5631	5.30608	3.77412e-07	0.000204195	Up	0.231903	12.2717	11:61458195:61511259:-	2221	3	XLOC_003144	ENSRNOT00000046208	o
TCONS_00006156	94.2699	18.9319	169.608	8.95885	3.16331	0.0147056	0.624964	Up	0.110267	1.30957	11:61462619:61511252:-	3577	2	XLOC_003144	ENSRNOT00000046208	o
TCONS_00006158	42.6529	0	85.3058	Inf	Inf	0.000858905	0.112918	Up	8.86671e-06	0.759909	11:61463098:61511254:-	3093	2	XLOC_003144	ENSRNOT00000046208	o
TCONS_00006331	146.086	261.061	31.1115	0.119173	-3.06887	0.00799265	0.460119	Down	3.14491	0.507618	11:80112639:80122617:-	1722	6	XLOC_003202		u
TCONS_00007462	262.182	71.7419	452.622	6.30904	2.65742	0.00818492	0.46034	Up	1.38343	11.6512	13:48697355:48709662:+	1074	2	XLOC_003749	ENSRNOT00000075674	o
TCONS_00008545	19.0683	0	38.1367	Inf	Inf	0.0188005	0.722585	Up	3.55684e-05	2.25344	14:46633703:46656266:+	462	2	XLOC_004267	ENSRNOT00000085875	o
TCONS_00008697	214.459	364.688	64.2302	0.176124	-2.50534	0.0157401	0.651225	Down	12.5268	2.95975	14:84213389:84292393:+	604	2	XLOC_004338	ENSRNOT00000005996	o
TCONS_00008701	196.033	325.828	66.2374	0.20329	-2.29839	0.0282406	0.888281	Down	7.8345	2.1098	14:84243042:84292385:+	863	2	XLOC_004338	ENSRNOT00000087383	o
TCONS_00009726	18.5666	0	37.1331	Inf	Inf	0.0203229	0.754307	Up	0.00717049	1.83648	15:18850194:18851875:-	555	2	XLOC_004859	ENSRNOT00000088264	i
TCONS_00010175	149.057	272.021	26.0935	0.0959245	-3.38196	0.00385594	0.304727	Down	15.5989	1.96172	16:8400281:8457999:+	361	3	XLOC_005062	ENSRNOT00000027071	o
TCONS_00011444	240.914	403.548	78.2806	0.193981	-2.36601	0.0189672	0.727008	Down	6.63925	1.72418	17:13078359:13083584:-	1261	3	XLOC_005706		u
TCONS_00011446	78.742	150.459	7.02518	0.0466917	-4.42069	0.00271908	0.252502	Down	1.48066	0.0962642	17:13080020:13089985:-	2110	3	XLOC_005706		u
TCONS_00011690	55.1655	8.96774	101.363	11.3031	3.49865	0.0246736	0.844486	Up	0.678054	10.7869	17:45530414:45596110:-	261	2	XLOC_005809		u
TCONS_00012596	45.6637	0	91.3274	Inf	Inf	0.000609112	0.0865493	Up	5.15589e-05	1.90659	18:60619920:60626958:-	1327	4	XLOC_006231	ENSRNOT00000023890	i
TCONS_00013132	43.8602	82.7025	5.01799	0.0606752	-4.04275	0.0204023	0.75526	Down	5.92812	0.464286	19:14541378:14542685:-	289	2	XLOC_006508	ENSRNOT00000084271	i
TCONS_00013849	17.4373	34.8745	0	0	#NAME?	0.0244695	0.839543	Down	2.86142	0.0333427	2:140456678:140465195:+	253	2	XLOC_006874	ENSRNOT00000058190	x
TCONS_00014061	111.111	219.211	3.01079	0.0137346	-6.18604	4.64153e-05	0.0111366	Down	7.95019	0.166285	2:194993483:194994154:+	572	2	XLOC_006986		u
TCONS_00014063	54.3154	105.62	3.01079	0.0285059	-5.1326	0.00347442	0.287498	Down	1.67131	0.0617611	2:195005166:195007038:+	1311	2	XLOC_006987		u
TCONS_00014086	120.122	225.19	15.054	0.0668501	-3.90293	0.00211209	0.213633	Down	3.25648	0.296049	2:196574679:196585713:+	1435	5	XLOC_007002	ENSRNOT00000081672	x
TCONS_00014262	2017.29	3048.04	986.536	0.323663	-1.62744	0.0491491	1	Down	16.9609	7.32676	2:213256808:213298844:+	3725	2	XLOC_007079		u
TCONS_00014686	2688.01	4907.35	468.68	0.0955058	-3.38827	0.000144103	0.027028	Down	282.539	35.9675	2:88126327:88155723:-	360	2	XLOC_007302	ENSRNOT00000014180	o
TCONS_00016564	228.373	402.552	54.1943	0.134627	-2.89296	0.00552032	0.373338	Down	1.98482	0.359419	3:35904319:36057243:+	4202	3	XLOC_008169		u
TCONS_00017724	71.2437	142.487	0	0	#NAME?	4.31292e-05	0.0110309	Down	11.6514	2.81759e-14	3:61869589:61936760:-	254	2	XLOC_008742		u
TCONS_00018478	108.237	181.348	35.1259	0.193694	-2.36815	0.0492751	1	Down	18.2191	4.70926	4:23548442:23671353:+	206	3	XLOC_009113		u
TCONS_00018802	21.5773	0	43.1547	Inf	Inf	0.0128708	0.580302	Up	6.86377e-10	2.57868	4:100615231:100616364:+	462	2	XLOC_009274	ENSRNOT00000020005	i
TCONS_00019387	31.1079	0.996416	61.2194	61.4397	5.9411	0.010146	0.50973	Up	0.0297374	2.67585	4:39944436:39999741:-	634	3	XLOC_009542		u
TCONS_00020453	15.054	0	30.1079	Inf	Inf	0.0353531	0.988802	Up	5.95554e-17	0.624325	5:91131894:91153201:+	1315	3	XLOC_010047		u
TCONS_00020467	35.1259	0	70.2518	Inf	Inf	0.00211934	0.213633	Up	7.56805e-20	1.52226	5:91131994:91139791:+	1277	3	XLOC_010047		u
TCONS_00021170	34.3763	68.7527	0	0	#NAME?	0.00235883	0.228839	Down	2.39229	0.000847713	5:50119899:50139403:-	595	2	XLOC_010395	ENSRNOT00000081150	o
TCONS_00021565	232.236	26.9032	437.568	16.2645	4.02366	0.000258358	0.0437869	Up	0.43201	9.52678	5:129360236:129361957:-	1270	2	XLOC_010552		u
TCONS_00022152	19.0683	0	38.1367	Inf	Inf	0.0188005	0.722585	Up	0	4.1722	6:26685773:26686104:+	253	2	XLOC_010830	ENSRNOT00000081167	o
TCONS_00022193	9636.57	3612.01	15661.1	4.33586	2.11632	0.0256592	0.856064	Up	60.9624	352.69	6:30627932:30630731:+	1228	3	XLOC_010843		u
TCONS_00022268	18.0648	0	36.1295	Inf	Inf	0.0219783	0.788697	Up	0.0115999	1.23572	6:44377004:44380910:+	798	3	XLOC_010873		u
TCONS_00022669	101.71	182.344	21.0755	0.115581	-3.11302	0.0140465	0.606112	Down	0.886378	0.134726	6:136818863:136828599:+	4270	2	XLOC_011085		u
TCONS_00023087	367.323	694.502	40.1439	0.0578024	-4.11273	5.6229e-05	0.0122551	Down	30.8187	2.34878	6:95384146:95465919:-	467	2	XLOC_011289	ENSRNOT00000074990	o
TCONS_00023101	50.1511	7.97132	92.331	11.5829	3.53392	0.0282738	0.888281	Up	0.0664319	1.01908	6:96439050:96491709:-	2518	2	XLOC_011293	ENSRNOT00000010923	o
TCONS_00023956	64.2688	128.538	0	0	#NAME?	8.50662e-05	0.0168539	Down	2.37916	3.90598e-08	7:123436281:123438607:+	1124	2	XLOC_011747	ENSRNOT00000082603	o
TCONS_00025252	16.9391	33.8781	0	0	#NAME?	0.0264563	0.867507	Down	2.63761	1.47637e-12	8:27779298:27824928:+	264	2	XLOC_012346	ENSRNOT00000009825	o
TCONS_00026497	52.3118	104.624	0	0	#NAME?	0.00029598	0.048983	Down	8.6035	0.030431	8:112926856:112958930:-	253	2	XLOC_012970		u
TCONS_00026667	39.38	72.7383	6.02158	0.0827842	-3.5945	0.0405776	1	Down	3.24819	0.35998	9:4109939:4113907:+	463	2	XLOC_013056	ENSRNOT00000085330	o
TCONS_00027646	65.18	14.9462	115.414	7.72193	2.94896	0.0392869	1	Up	0.430967	4.5385	9:95250857:95253296:-	704	3	XLOC_013554	ENSRNOT00000032634	i
TCONS_00027887	17.0612	0	34.1223	Inf	Inf	0.0257245	0.856064	Up	2.65076e-12	0.69325	X:14570702:14612577:+	1381	3	XLOC_013684	ENSRNOT00000038994	o

## Sheet: 36h vs 0h
id	baseMean	baseMean_control_0h	baseMean_case_36h	foldChange	log2FoldChange	pval	padj	up_down	expression_0h	expression_36h	locus	length	exon_count	gene_id	nearest_ref	class_code
NONRATT000056.2	79.905	2.14377	157.666	73.5463	6.20058	0.000611011	0.0834864	Up	0.0496364	4.50115	1:15820516:15826630:+	21511020	3
NONRATT000240.2	21.924	0	43.848	Inf	Inf	0.0200131	0.749361	Up	6.24415e-27	2.07874	1:56997310:57001664:+	21623565	4
NONRATT000341.2	30.0128	60.0255	0	0	#NAME?	0.00591072	0.383284	Down	2.30374	1.27619e-25	1:73656038:73659710:-	22879485	3
NONRATT000410.2	43.8778	86.8226	0.932936	0.0107453	-6.54015	0.00388865	0.293257	Down	5.2493	0.0413429	1:79743619:79752615:+	21714624	4
NONRATT000460.2	22.3905	0	44.7809	Inf	Inf	0.0188142	0.738906	Up	4.8167e-31	3.31774	1:81328169:81332405:+	21739316	3
NONRATT000544.2	27.0552	0	54.1103	Inf	Inf	0.0103548	0.529005	Up	1.4e-10	1.50633	1:85448890:85455829:+	21784028	9
NONRATT000751.2	22.8569	0	45.7139	Inf	Inf	0.017691	0.725228	Up	2.59463e-09	2.31492	1:114258761:114290654:+	21904381	3
NONRATT000867.2	20.9017	41.8035	0	0	#NAME?	0.0192918	0.739559	Down	0.956969	8.63486e-15	1:143427602:143428453:+	21975512	1
NONRATT000892.2	42.3891	78.2476	6.53055	0.0834602	-3.58277	0.0495839	1	Down	1.22383	0.109369	X:156324474:156326495:+	41153129	4
NONRATT000947.2	98.4446	7.50319	189.386	25.2407	4.65768	0.00214337	0.19231	Up	0.295789	8.59298	1:156288258:156289272:+	22002203	2
NONRATT001047.2	480.829	163.998	797.661	4.86383	2.28209	0.0269227	0.88294	Up	3.15613	16.8677	1:166982189:166985363:+	22070175	6
NONRATT001051.2	29.3875	0	58.775	Inf	Inf	0.00785545	0.470865	Up	4.2625e-14	1.56228	1:167089887:167090679:+	22071917	1
NONRATT001060.2	31.9481	61.0974	2.79881	0.045809	-4.44823	0.0363843	1	Down	1.17462	0.0588477	1:168762541:168763551:+	22076811	1
NONRATT001084.2	16.3264	0	32.6528	Inf	Inf	0.0428581	1	Up	1.55294e-12	1.19666	1:174330932:174338682:+	22093353	4
NONRATT001086.2	33.1192	0	66.2385	Inf	Inf	0.00517469	0.35836	Up	4.75095e-10	4.0926	1:174335749:174338680:+	22094362	2
NONRATT001137.2	20.9911	0	41.9821	Inf	Inf	0.022654	0.797979	Up	1.82742e-22	0.399948	1:188436786:188444995:+	22132435	6
NONRATT001240.2	26.6582	51.4505	1.86587	0.0362654	-4.78526	0.0399537	1	Down	1.92467	0.0729485	1:199294670:199295188:+	22193672	1
NONRATT001405.2	15.5423	31.0846	0	0	#NAME?	0.0411446	1	Down	0.712243	4.95581e-10	1:219346506:219347703:+	22286483	2
NONRATT001448.2	17.7258	0	35.4516	Inf	Inf	0.0353647	0.996761	Up	0.000421914	0.474979	1:220950797:220952357:+	22313501	1
NONRATT001466.2	123.773	9.64696	237.899	24.6605	4.62413	0.00125206	0.141762	Up	0.267717	7.24822	1:221454187:221454882:+	22324065	1
NONRATT001641.2	14.4704	28.9409	0	0	#NAME?	0.0476206	1	Down	1.44569	9.97895e-29	1:244775919:244779588:+	22435883	3
NONRATT001673.2	16.6142	33.2284	0	0	#NAME?	0.0354239	0.996761	Down	0.414324	0.000370273	1:250512249:250513791:+	22463959	1
NONRATT001695.2	23.0455	46.091	0	0	#NAME?	0.0143751	0.648303	Down	3.14566	0	1:255422190:255422595:+	22481087	2
NONRATT001705.2	36.5929	3.21565	69.9702	21.7593	4.44356	0.0302169	0.93479	Up	0.197763	4.52918	1:256103847:256104496:+	22485220	2
NONRATT001713.2	12282.4	21106.5	3458.4	0.163855	-2.60951	0.0245621	0.83231	Down	743.497	133.772	1:258002993:258004282:+	22490035	2
NONRATT001714.2	130.879	227.239	34.5186	0.151904	-2.71877	0.0324409	0.969165	Down	17.2058	2.84441	1:258002996:258004034:+	22490289	2
NONRATT001717.2	374.594	7.50319	741.684	98.8492	6.62716	6.51772e-07	0.000715244	Up	0.157138	17.6343	1:258234313:258252793:+	22492211	4
NONRATT001718.2	83.607	167.214	0	0	#NAME?	3.71836e-05	0.00964476	Down	13.0969	6.05591e-07	1:258271484:258271730:+	22492457	1
NONRATT001742.2	84.4307	0	168.861	Inf	Inf	5.05749e-05	0.012025	Up	9.11994e-09	2.0303	1:261434057:261435821:+	22508836	1
NONRATT001774.2	23.7899	0	47.5798	Inf	Inf	0.0156553	0.674738	Up	2.62123e-24	2.58418	1:265100510:265237732:+	22538525	4
NONRATT001806.2	36.5235	2.14377	70.9032	33.0741	5.04763	0.0190562	0.739559	Up	0.0573185	2.17518	1:266121407:266122098:+	22556008	1
NONRATT001822.2	68.6006	137.201	0	0	#NAME?	0.000125848	0.0230174	Down	11.1704	9.6834e-59	1:266476428:266477166:+	22565433	2
NONRATT001824.2	17.6861	35.3722	0	0	#NAME?	0.0304039	0.93479	Down	2.90991	1.11563e-31	1:266483363:266484337:+	22566602	2
NONRATT001827.2	55.202	110.404	0	0	#NAME?	0.000427514	0.0648821	Down	5.60803	0	1:266506239:266506619:+	22568872	1
NONRATT001842.2	21.924	0	43.848	Inf	Inf	0.0200131	0.749361	Up	6.80191e-12	1.08159	1:267412624:267413932:+	22583016	2
NONRATT001930.2	74.1684	0	148.337	Inf	Inf	0.000111093	0.0217102	Up	2.97525e-06	4.13237	1:2000374:2001227:-	22637129	2
NONRATT001976.2	23.0455	46.091	0	0	#NAME?	0.0143751	0.648303	Down	1.46818	1.06539e-06	1:13384155:13384758:-	22664590	1
NONRATT002017.2	28.921	0	57.8421	Inf	Inf	0.00829174	0.482816	Up	7.04278e-14	2.08574	1:24327314:24327902:-	22694298	1
NONRATT002061.2	381.075	618.477	143.672	0.2323	-2.10594	0.0443011	1	Down	16.0335	4.09402	1:35846497:35865084:-	22726769	2
NONRATT002083.2	30.4792	60.0255	0.932936	0.0155423	-6.00765	0.0148217	0.662843	Down	1.62789	0.028506	1:37977333:38007302:-	22741695	4
NONRATT002087.2	17.2593	0	34.5186	Inf	Inf	0.0377197	1	Up	6.87549e-29	2.07118	1:37988340:38009451:-	22744677	4
NONRATT002104.2	26.1917	1.07188	51.3115	47.8704	5.58106	0.0290652	0.9219	Up	0.0210569	0.875548	1:42461291:42462528:-	22753147	1
NONRATT002142.2	104.022	0	208.045	Inf	Inf	1.36343e-05	0.00486266	Up	0.000432773	5.7054	1:48273640:48284515:+	21599950	3
NONRATT002381.2	139.295	33.2284	245.362	7.38411	2.88442	0.0228913	0.803509	Up	0.444824	3.54985	1:81179588:81181048:-	22920861	1
NONRATT002548.2	28.4049	56.8099	0	0	#NAME?	0.00716533	0.438715	Down	1.16024	0.00532099	1:90149379:90150317:-	23011900	1
NONRATT002687.2	14455.8	423.394	28488.1	67.2851	6.07222	1.22407e-05	0.0044776	Up	20.6608	1525.9	1:102786004:102788504:-	23084912	3
NONRATT002896.2	21.4377	42.8754	0	0	#NAME?	0.0179188	0.726311	Down	0.549946	4.40068e-06	X:157073859:157081220:-	41465138	4
NONRATT002911.2	47.1629	94.3258	0	0	#NAME?	0.000938679	0.114173	Down	3.72297	9.29784e-05	1:151494211:151494924:-	23203908	2
NONRATT002935.2	84.262	162.926	5.59762	0.0343567	-4.86326	0.0022827	0.199785	Down	4.9815	0.190369	1:161941139:161941770:-	23220097	1
NONRATT002938.2	286.56	534.87	38.2504	0.0715134	-3.80564	0.00112724	0.129008	Down	14.8109	1.16602	1:162381402:162385571:-	23221027	2
NONRATT003015.2	24.1174	48.2348	0	0	#NAME?	0.0124344	0.60132	Down	2.40988	3.88078e-23	Un_AABR07024041v1:23532:30973:-	40893782	2
NONRATT003019.2	125.41	250.821	0	0	#NAME?	2.63851e-06	0.00179243	Down	11.1286	2.22763e-20	1:168971268:168971702:-	23270396	1
NONRATT003070.2	17.6861	35.3722	0	0	#NAME?	0.0304039	0.93479	Down	1.06249	4.15239e-43	1:180491928:181215438:-	23295891	7
NONRATT003289.2	659.407	33.2284	1285.59	38.6894	5.27387	5.86961e-06	0.00274925	Up	0.225608	9.67618	1:207993894:208000105:-	23453079	3
NONRATT003292.2	490.079	33.2284	946.93	28.4976	4.83277	3.20374e-05	0.0086235	Up	0.545446	16.9303	1:208000146:208001329:-	23455822	1
NONRATT003452.2	28.4049	56.8099	0	0	#NAME?	0.00716533	0.438715	Down	2.12761	2.94087e-26	1:220862473:220863476:-	23540528	3
NONRATT003464.2	74.7242	8.57508	140.873	16.4282	4.03811	0.0103828	0.529005	Up	0.359166	6.56169	1:221088315:221089493:-	23545373	4
NONRATT003484.2	42.3394	84.6789	0	0	#NAME?	0.00152692	0.155593	Down	1.63714	2.63694e-11	1:221346080:221348944:-	23559104	4
NONRATT003515.2	18.1923	0	36.3845	Inf	Inf	0.0331524	0.969165	Up	6.16117e-18	1.89438	1:222232350:222233696:-	23572623	4
NONRATT003527.2	20.9911	0	41.9821	Inf	Inf	0.022654	0.797979	Up	8.16927e-31	2.04995	1:222468504:222468936:-	23579560	1
NONRATT003536.2	24.7228	0	49.4456	Inf	Inf	0.0138749	0.638512	Up	9.13787e-10	2.49795	1:222744903:222745429:-	23586288	2
NONRATT003557.2	61.3356	10.7188	111.952	10.4444	3.38466	0.0356662	1	Up	0.193106	2.32181	1:225923449:225924467:-	23597065	1
NONRATT003567.2	43.6594	4.28754	83.0313	19.3657	4.27543	0.0249998	0.843136	Up	0.1453	3.13461	1:226548541:226572396:-	23602415	2
NONRATT003609.2	67.6379	0	135.276	Inf	Inf	0.000190372	0.0323316	Up	5.88134e-30	11.8501	1:229638964:229639205:-	23624993	1
NONRATT003668.2	18.758	37.516	0	0	#NAME?	0.0260714	0.860959	Down	2.56095	3.67746e-33	1:242582582:242607982:-	23662429	2
NONRATT003682.2	34.2308	67.5287	0.932936	0.0138154	-6.17758	0.0100231	0.528604	Down	2.32055	0.0321963	1:245476402:245482170:-	23670435	3
NONRATT003683.2	150.421	32.1565	268.686	8.35556	3.06274	0.0149875	0.666079	Up	0.828625	7.58613	1:245476402:245514262:-	23671184	5
NONRATT003720.2	88.232	1.07188	175.392	163.63	7.35429	0.000146644	0.0258274	Up	0.00874354	1.82357	1:252816535:252818575:-	23698456	1
NONRATT003723.2	215.975	0	431.95	Inf	Inf	8.77941e-08	0.000139163	Up	2.36284e-07	5.73407	1:253119110:253122079:-	23701227	2
NONRATT003806.2	80.0737	141.489	18.6587	0.131874	-2.92276	0.0428965	1	Down	2.96577	0.42097	1:263778528:263781165:-	23750260	3
NONRATT003807.2	66.5065	126.482	6.53055	0.0516321	-4.27559	0.00944938	0.51848	Down	3.2241	0.171642	1:263778533:263779291:-	23751018	1
NONRATT004036.2	188.126	52.5223	323.729	6.16364	2.62378	0.0265905	0.876073	Up	0.725271	4.86925	10:730270:751058:+	23856098	5
NONRATT004054.2	132.477	0	264.954	Inf	Inf	2.83565e-06	0.00183879	Up	0.0123401	13.7274	10:12994635:12995679:+	23910975	2
NONRATT004058.2	21.9935	1.07188	42.9151	40.037	5.32326	0.0472975	1	Up	0.0265547	0.876529	10:13067604:13068640:+	23912642	1
NONRATT004060.2	269.897	508.073	31.7198	0.0624316	-4.00158	0.000776908	0.100758	Down	4.16876	0.284464	10:13153814:13156163:+	23915592	1
NONRATT004072.2	157.2	50.3786	264.021	5.24074	2.38977	0.0484824	1	Up	0.967733	5.59588	10:13786482:13791773:+	23922411	4
NONRATT004090.2	27.0552	0	54.1103	Inf	Inf	0.0103548	0.529005	Up	2.30143e-08	3.22347	10:14088653:14090018:+	23929709	5
NONRATT004096.2	96.5589	0	193.118	Inf	Inf	2.18344e-05	0.00651423	Up	1.23985e-08	8.1583	10:14257631:14258132:+	23932623	1
NONRATT004111.2	14.4704	28.9409	0	0	#NAME?	0.0476206	1	Down	0.486737	1.14604e-17	10:15151553:15152709:+	23940347	1
NONRATT004125.2	16.0783	32.1565	0	0	#NAME?	0.0381968	1	Down	0.755987	1.67708e-33	10:15538952:15540153:+	23947894	2
NONRATT004279.2	106.821	0	213.642	Inf	Inf	1.15265e-05	0.0043273	Up	1.95705e-09	4.78624	10:39868992:39869938:+	24049038	1
NONRATT004310.2	20.9911	0	41.9821	Inf	Inf	0.022654	0.797979	Up	1.34794e-20	1.88577	10:43496099:43496665:+	24067494	2
NONRATT004323.2	16.7929	0	33.5857	Inf	Inf	0.0402168	1	Up	3.81157e-10	1.17541	10:43768708:43769771:+	24074839	2
NONRATT004419.2	118.096	30.0128	206.179	6.86971	2.78025	0.0333205	0.970103	Up	0.720171	5.4473	10:54468424:54469891:+	24140574	2
NONRATT004831.2	144.208	1.07188	287.344	268.074	8.06649	7.00878e-06	0.00302991	Up	0.00488	2.25595	10:85782432:85785130:+	24442657	1
NONRATT005011.2	31.2534	0	62.5067	Inf	Inf	0.00635773	0.406723	Up	1.6079e-10	0.506023	10:97680658:97683273:+	24549773	1
NONRATT005085.2	23.7899	0	47.5798	Inf	Inf	0.0156553	0.674738	Up	0	1.4013	10:103620215:103622789:-	25318097	2
NONRATT005180.2	133.539	23.5815	243.496	10.3258	3.36818	0.0101382	0.529005	Up	0.424987	4.85225	10:4904201:4905262:-	24653024	1
NONRATT005328.2	24.5839	48.2348	0.932936	0.0193416	-5.69215	0.0288907	0.9219	Down	1.11303	0.0131086	10:16769853:16774901:-	24752314	2
NONRATT005335.2	356.282	113.62	598.945	5.27149	2.39821	0.0246654	0.833832	Up	1.75611	10.1557	10:17044161:17045408:-	24757554	1
NONRATT005357.2	737.407	20.3658	1454.45	71.4162	6.15818	3.90241e-07	0.000506107	Up	0.316391	25.1393	10:25860699:25861923:-	24768005	1
NONRATT005363.2	175.997	2.14377	349.851	163.194	7.35045	5.11176e-06	0.00274925	Up	0.0462928	10.3493	10:29020028:29025486:-	24770596	6
NONRATT005389.2	110.94	221.88	0	0	#NAME?	5.97411e-06	0.00274925	Down	14.6731	0	10:35737593:35737885:-	24791365	1
NONRATT005391.2	29.9234	1.07188	58.775	54.8333	5.77698	0.0194402	0.739559	Up	0.00411624	0.352092	10:35765708:35775683:-	24795427	4
NONRATT005433.2	22.3905	0	44.7809	Inf	Inf	0.0188142	0.738906	Up	1.07327e-18	1.35243	10:40057201:40122505:-	24820943	5
NONRATT005486.2	37.1289	4.28754	69.9702	16.3194	4.02852	0.0417964	1	Up	0.133352	2.67837	10:46182681:46185675:-	24849688	3
NONRATT005511.2	28.524	1.07188	55.9762	52.2222	5.70659	0.0225199	0.797979	Up	0.0189065	1.95781	10:48587105:48593320:-	24870931	3
NONRATT005513.2	20.0581	0	40.1163	Inf	Inf	0.0256622	0.859382	Up	7.02777e-26	2.67494	10:48637516:48639354:-	24872641	2
NONRATT005557.2	34.8362	69.6725	0	0	#NAME?	0.00341092	0.268841	Down	1.71499	3.15514e-17	10:55430432:55482483:-	24898035	5
NONRATT005580.2	33.7941	3.21565	64.3726	20.0185	4.32326	0.0384809	1	Up	0.0324701	0.728252	10:56277182:56279145:-	24911295	2
NONRATT005699.2	89.3435	18.222	160.465	8.8061	3.1385	0.0272571	0.886447	Up	0.160955	1.52085	10:64362876:64367683:+	24269127	5
NONRATT005772.2	102.623	0	205.246	Inf	Inf	1.48545e-05	0.00505679	Up	2.65626e-16	7.80648	10:67753080:67753637:-	25026477	1
NONRATT005847.2	24.6533	49.3067	0	0	#NAME?	0.0115742	0.569368	Down	1.84061	4.36411e-06	10:74883461:74884200:+	24349780	2
NONRATT005856.2	30.9258	2.14377	59.7079	27.8519	4.7997	0.0320059	0.967364	Up	0.0898229	2.73859	10:74413979:74431121:+	24342097	4
NONRATT005865.2	230.376	380.519	80.2325	0.21085	-2.24571	0.0458844	1	Down	5.34329	1.23916	10:77836345:77837717:-	25085290	1
NONRATT005889.2	119.416	0	238.832	Inf	Inf	5.63834e-06	0.00274925	Up	7.34775e-10	10.0031	10:81999768:82026736:-	25101783	6
NONRATT005949.2	69.5038	0	139.008	Inf	Inf	0.000162722	0.0279686	Up	0.0106296	4.31957	10:85096508:85099341:-	25136346	3
NONRATT006021.2	30.5487	61.0974	0	0	#NAME?	0.00555083	0.373529	Down	3.02283	1.73374e-23	10:88433865:88434704:-	25181287	2
NONRATT006055.2	33.0895	64.3131	1.86587	0.0290123	-5.10719	0.0209109	0.769323	Down	2.94105	0.0984688	10:89371315:89371737:-	25199310	1
NONRATT006088.2	17.2593	0	34.5186	Inf	Inf	0.0377197	1	Up	1.12987e-11	1.32681	10:90351899:90352448:-	25218123	1
NONRATT006101.2	24.5839	48.2348	0.932936	0.0193416	-5.69215	0.0288907	0.9219	Down	1.59453	0.0218438	10:90644990:90645567:-	25226282	1
NONRATT006212.2	192.651	50.3786	334.924	6.64815	2.73295	0.0209776	0.769323	Up	0.538396	3.97171	10:97733700:97735485:-	25296103	1
NONRATT006242.2	161.785	322.637	0.932936	0.0028916	-8.43392	2.00808e-06	0.00150775	Down	14.2177	0.0533384	10:102244679:102245116:-	25314134	1
NONRATT006309.2	19.8299	39.6597	0	0	#NAME?	0.022389	0.797979	Down	1.17448	6.04875e-12	10:105792780:105794021:-	25359180	3
NONRATT006443.2	119.982	239.03	0.932936	0.00390301	-8.0012	1.48875e-05	0.00505679	Down	11.0929	0.0536255	11:31806635:31812815:+	25450850	3
NONRATT006490.2	351.221	618.477	83.9643	0.13576	-2.88087	0.00819547	0.482816	Down	4.77065	0.711012	11:35586020:35588517:+	25490564	1
NONRATT006530.2	581.041	133.986	1028.1	7.67319	2.93983	0.00488469	0.345628	Up	2.93001	24.6679	11:46205838:46206720:+	25515557	1
NONRATT006707.2	20.3658	40.7316	0	0	#NAME?	0.0207729	0.767737	Down	2.01126	1.34987e-30	11:82384280:82385297:+	25625276	2
NONRATT006745.2	155.959	311.918	0	0	#NAME?	5.76267e-07	0.000685085	Down	10.9269	4.69928e-16	11:87074160:87075574:+	25645523	3
NONRATT006787.2	210.447	353.722	67.1714	0.189899	-2.3967	0.0368174	1	Down	10.3101	2.15699	11:1886537:1887198:-	25672229	1
NONRATT006873.2	22.5096	45.0191	0	0	#NAME?	0.0154663	0.674738	Down	3.19803	3.91933e-22	11:31788282:31788553:-	25728041	1
NONRATT006947.2	15.0064	30.0128	0	0	#NAME?	0.0442737	1	Down	1.35901	2.02316e-27	11:46335957:46422643:-	25771915	4
NONRATT006955.2	81.1655	0	162.331	Inf	Inf	6.4462e-05	0.0141479	Up	0	4.78779	11:49707733:49708735:-	25776847	2
NONRATT007051.2	17.2593	0	34.5186	Inf	Inf	0.0377197	1	Up	1.43174e-31	1.75265	11:70286420:70286832:-	25844570	1
NONRATT007057.2	26.7971	53.5942	0	0	#NAME?	0.00875191	0.497567	Down	2.99528	3.26039e-23	11:70570446:70570791:-	25848595	1
NONRATT007058.2	31.3228	1.07188	61.5738	57.4444	5.8441	0.0168387	0.706533	Up	0.00949383	0.833083	11:70693375:70703646:-	25850156	5
NONRATT007105.2	62.9236	6.43131	119.416	18.5679	4.21474	0.0122439	0.598188	Up	0.2375	5.21857	11:74217449:74219413:-	25881656	3
NONRATT007126.2	8377.48	2435.32	14319.6	5.87998	2.55581	0.0203097	0.758477	Up	113.603	733.55	11:81421672:81423274:-	25905719	2
NONRATT007128.2	34.5186	0	69.0373	Inf	Inf	0.00444506	0.325196	Up	8.82106e-17	5.76265	11:81432992:81444208:-	25905974	4
NONRATT007215.2	139.444	265.827	13.0611	0.0491338	-4.34714	0.00145629	0.152761	Down	16.0008	0.872788	12:2170726:2172383:+	25961148	4
NONRATT007268.2	18.1923	0	36.3845	Inf	Inf	0.0331524	0.969165	Up	1.72251e-35	0.749602	12:11194960:11195989:+	25997251	1
NONRATT007391.2	1151.08	2106.25	195.917	0.0930167	-3.42637	0.000976394	0.117052	Down	11.7105	1.19451	12:23814418:23817884:+	26073550	1
NONRATT007458.2	24.1174	48.2348	0	0	#NAME?	0.0124344	0.60132	Down	1.83921	1.86523e-05	12:36642113:36642735:+	26115054	2
NONRATT007496.2	23.3929	1.07188	45.7139	42.6481	5.41441	0.0401056	1	Up	0.0292697	0.982666	12:38289091:38291970:+	26136036	2
NONRATT007502.2	67.5287	135.057	0	0	#NAME?	0.000138158	0.0246371	Down	8.39249	0.00832221	12:38459826:38461972:+	26141659	3
NONRATT007530.2	382.127	8.57508	755.679	88.125	6.46148	8.83319e-07	0.000830397	Up	0.279535	25.6517	12:39599116:39599823:+	26155270	2
NONRATT007728.2	18.758	37.516	0	0	#NAME?	0.0260714	0.860959	Down	1.09568	3.42508e-25	12:9216797:9222172:-	26278108	4
NONRATT007974.2	50.845	0	101.69	Inf	Inf	0.000864772	0.108218	Up	3.16421e-13	2.87842	12:38793941:38804657:-	26436929	3
NONRATT008016.2	178.37	319.422	37.3175	0.116828	-3.09754	0.0109776	0.55143	Down	8.73586	1.12095	12:41623687:41624501:-	26459079	2
NONRATT008127.2	128.358	30.0128	226.704	7.55357	2.91716	0.0238979	0.826279	Up	2.13192	17.5026	13:12298542:12298816:+	26524583	1
NONRATT008163.2	22.8569	0	45.7139	Inf	Inf	0.017691	0.725228	Up	2.49046e-19	1.31323	13:41903968:41921497:+	26547731	8
NONRATT008180.2	206.338	412.675	0	0	#NAME?	7.32668e-08	0.000130653	Down	10.7419	0.00647435	13:44974929:44986951:+	26559858	5
NONRATT008218.2	41.5157	0	83.0313	Inf	Inf	0.00214142	0.19231	Up	1.6231e-09	4.21534	13:50252709:50258947:+	26583161	5
NONRATT008232.2	43.7984	6.43131	81.1655	12.6204	3.65768	0.045361	1	Up	0.106593	1.49312	13:51232792:51236437:+	26590639	5
NONRATT008236.2	177.397	2.14377	352.65	164.5	7.36194	4.84616e-06	0.00274925	Up	0.0807738	13.1019	13:51795920:51801377:+	26594762	4
NONRATT008267.2	37.4564	2.14377	72.769	33.9444	5.0851	0.0175159	0.725228	Up	0.0451235	2.03798	13:53419891:53420649:+	26616212	1
NONRATT008386.2	31.0846	62.1693	0	0	#NAME?	0.00521578	0.359461	Down	2.48968	1.26662e-15	13:78973627:78979300:+	26700026	4
NONRATT008391.2	685.51	227.239	1143.78	5.03337	2.33152	0.0209424	0.769323	Up	5.36753	29.6471	13:79204474:79205290:+	26703534	1
NONRATT008517.2	150.252	43.9473	256.558	5.83785	2.54544	0.0384705	1	Up	0.536363	3.46487	13:98966434:98969051:+	26781003	3
NONRATT008543.2	79.7661	0	159.532	Inf	Inf	7.16832e-05	0.0154944	Up	0.000189646	6.77096	13:103406815:103407314:+	26795569	1
NONRATT008544.2	18.758	37.516	0	0	#NAME?	0.0260714	0.860959	Down	0.359814	4.02919e-07	13:103408353:103410345:+	26797561	1
NONRATT008570.2	51.5199	3.21565	99.8242	31.0432	4.95621	0.00900991	0.508045	Up	0.100003	3.06136	13:109697161:109697848:+	26813623	1
NONRATT008580.2	997.448	52.5223	1942.37	36.9819	5.20875	4.74693e-06	0.00274925	Up	0.608211	24.7761	13:110522778:110524750:+	26821854	2
NONRATT008761.2	30.0128	60.0255	0	0	#NAME?	0.00591072	0.383284	Down	0.532705	0	13:53750469:53752636:-	26943374	1
NONRATT008838.2	14.4704	28.9409	0	0	#NAME?	0.0476206	1	Down	2.28212	0	13:72912017:72912261:-	26994557	1
NONRATT008999.2	150.094	34.3003	265.887	7.75174	2.95452	0.0183757	0.736372	Up	0.714905	6.1445	13:92082662:92090222:-	27108821	4
NONRATT009065.2	34.8362	69.6725	0	0	#NAME?	0.00341092	0.268841	Down	3.41367	6.76823e-07	13:99509698:99522200:-	27148981	3
NONRATT009130.2	77.1757	3.21565	151.136	47	5.55459	0.00138308	0.147543	Up	0.0833341	3.79462	13:110219278:110220123:-	27184173	1
NONRATT009156.2	72.0545	132.914	11.1952	0.0842294	-3.56953	0.0204593	0.760085	Down	6.93884	0.643325	14:570243:612045:+	27201194	3
NONRATT009189.2	48.7707	97.5415	0	0	#NAME?	0.000799945	0.101893	Down	0.994057	1.11037e-09	14:3680661:3682553:+	27216814	1
NONRATT009200.2	27.73	53.5942	1.86587	0.0348148	-4.84415	0.0356799	1	Down	1.42453	0.0463925	14:7125988:7128215:+	27223892	2
NONRATT009362.2	18.222	36.4441	0	0	#NAME?	0.0281531	0.908671	Down	1.05632	0.00206142	14:44456586:44457242:+	27333721	1
NONRATT009365.2	22.5096	45.0191	0	0	#NAME?	0.0154663	0.674738	Down	1.67418	3.03064e-25	14:44496823:44498197:+	27337047	2
NONRATT009419.2	85.7508	171.502	0	0	#NAME?	3.16497e-05	0.0086235	Down	5.45078	2.265e-05	14:71437009:71452244:+	27364096	6
NONRATT009469.2	20.5246	0	41.0492	Inf	Inf	0.0241046	0.826279	Up	5.08288e-12	1.19016	14:81363725:81365099:+	27396584	5
NONRATT009606.2	57.3954	7.50319	107.288	14.2989	3.83784	0.0232963	0.81457	Up	0.197172	3.25323	14:108248708:108263252:+	27501309	6
NONRATT009626.2	105.323	12.8626	197.783	15.3765	3.94266	0.0057029	0.376869	Up	0.636274	10.5569	14:107617513:107617910:+	27493075	1
NONRATT009663.2	79.8554	159.711	0	0	#NAME?	4.9679e-05	0.0120122	Down	3.86623	3.52808e-09	14:115262156:115267722:+	27524641	4
NONRATT009668.2	19.2939	38.5878	0	0	#NAME?	0.0241524	0.826279	Down	1.42602	1.78282e-06	14:4608:212674:-	27527351	2
NONRATT009907.2	44.7809	0	89.5619	Inf	Inf	0.00155171	0.155892	Up	3.25776e-05	0.738217	14:45142769:45146313:-	27698454	2
NONRATT009918.2	2018.5	814.632	3222.36	3.9556	1.9839	0.0433414	1	Up	48.4422	210.406	14:46251417:46251741:-	27704588	1
NONRATT009925.2	19.2939	38.5878	0	0	#NAME?	0.0241524	0.826279	Down	1.28291	0.00474002	14:56912271:56912858:-	27707774	2
NONRATT009942.2	16.7929	0	33.5857	Inf	Inf	0.0402168	1	Up	1.80859e-28	0.985236	14:62630910:62646048:-	27717965	6
NONRATT009960.2	532.081	40.7316	1023.43	25.1262	4.65112	4.70393e-05	0.011757	Up	0.268939	7.42355	14:69896525:69899441:-	27730201	1
NONRATT010043.2	17.2593	0	34.5186	Inf	Inf	0.0377197	1	Up	0.000201082	1.13151	14:81661628:81679571:-	27774073	6
NONRATT010080.2	15.5423	31.0846	0	0	#NAME?	0.0411446	1	Down	0.254606	3.81372e-10	14:83648400:83660792:-	27802193	6
NONRATT010196.2	38.0519	76.1038	0	0	#NAME?	0.00239675	0.207224	Down	6.02836	9.78768e-95	14:110728075:110728318:-	27879362	1
NONRATT010217.2	25.7252	51.4505	0	0	#NAME?	0.0100485	0.528604	Down	2.1133	1.18006e-13	14:115006910:115052456:-	27892246	4
NONRATT010219.2	16.3264	0	32.6528	Inf	Inf	0.0428581	1	Up	1.28401e-17	1.29089	14:115315073:115318343:-	27894410	2
NONRATT010241.2	175.253	48.2348	302.271	6.26667	2.6477	0.0273115	0.886447	Up	2.50801	17.3314	15:4130600:4130969:+	27907921	1
NONRATT010309.2	359.488	645.274	73.702	0.114218	-3.13014	0.00439166	0.322945	Down	50.1216	6.30533	15:19139713:19139961:+	27944296	1
NONRATT010350.2	28.921	0	57.8421	Inf	Inf	0.00829174	0.482816	Up	4.1652e-31	4.61022	15:25344165:25347981:+	27976684	2
NONRATT010360.2	514.971	1029.01	0.932936	0.000906636	-10.1072	3.96777e-10	2.83021e-06	Down	75.088	0.0768528	15:27875918:27879677:+	27985416	2
NONRATT010364.2	113.213	199.37	27.0552	0.135703	-2.88148	0.0291426	0.9219	Down	5.61187	0.838891	15:28017994:28034568:+	27987717	3
[truncated: 426 more rows]

## Sheet: 72h vs 0h
id	baseMean	baseMean_control_0h	baseMean_case_72h	foldChange	log2FoldChange	pval	padj	up_down	expression_0h	expression_72h	locus	length	exon_count	gene_id	nearest_ref	class_code
[truncated: 561 more rows]

[truncated: 3 more sheets: 120h vs 0h, 168h vs 0h, sequence]
