# Supplementary material for: lncRNA Expression Reveals the Potential Regulatory Roles in Hepatocyte Proliferation during Rat Liver Regeneration
Source: Biomed Res Int. 2019 Nov 11;2019:8597953. doi: 10.1155/2019/8597953 (PMC6885160; doi:10.1155/2019/8597953)
Supplement: Supplementary Materials — Table S1: results of analyzing differentially expressed lncRNAs at 2, 6, 12, 24, 30, 36, 72,120, and 168 h after PH was compared with CG. Table S2: results of analyzing differentially expressed mRNAs at 2, 6, 12, 24, 30, 36, 72,120, and 168 h after PH was compared with CG. Table S3: results of GO enrichment analysis of differentially expressed mRNAs. Table S4: screened coexpression pairs between DE lncRNAs and proliferation-related DE mRNAs based on the Pearson correlation coefficient. [file 8597953.f1.zip › 8597953.f1/Table S2.xlsx]

## Sheet: 2h vs 0h
id	baseMean	baseMean_control_0h	baseMean_case_2h	foldChange	log2FoldChange	pval	padj	up_down	expression_0h	expression_2h	chromosome_position	gene_symbol
ENSRNOT00000000497	93	32	154	4.8125	2.26679	0.034673	0.739607	Up	0.397803	1.83638	20:4381455:4390436:-1	Ppt2
ENSRNOT00000000559	211.5	90	333	3.7	1.88753	0.0196018	0.524883	Up	0.755629	2.69333	20:5480103:5485850:-1	Daxx
ENSRNOT00000000628	349	96	602	6.27083	2.64866	0.000332106	0.0300897	Up	1.07045	6.42077	20:6356423:6358864:1	Cdkn1a
ENSRNOT00000000718	1513.5	937	2090	2.23052	1.15738	0.046782	0.867521	Up	7.79758	16.7085	20:45143453:45260119:-1	Slc16a10
ENSRNOT00000000792	81	0	162	Inf	Inf	1.54478e-06	0.000309611	Up	0	0.994507	20:22454463:22459025:-1	Egr2
ENSRNOT00000000995	1277.5	1770	785	0.443503	-1.17298	0.0458023	0.858177	Down	54.2354	23.0983	20:1876173:1878126:-1	Ubd
ENSRNOT00000001017	18	1	35	35	5.12928	0.045026	0.84683	Up	0.0152949	0.480567	20:2194709:2201668:1	Trim15
ENSRNOT00000001099	1849	928	2770	2.98491	1.57769	0.00692466	0.273703	Up	17.4632	50.0336	20:3438798:3440002:-1	Ier3
ENSRNOT00000001169	17.5	0	35	Inf	Inf	0.0194418	0.522008	Up	1.18963e-09	0.329437	X:159158194:159172518:1	Fhl1
ENSRNOT00000001196	732.5	410	1055	2.57317	1.36355	0.0280024	0.653675	Up	2.99953	7.40512	12:29961120:29988959:-1	Rabgef1
ENSRNOT00000001211	18615	10438	26792	2.56678	1.35996	0.0347028	0.739607	Up	120.501	297.024	12:30165694:30178341:1	Asl
ENSRNOT00000001234	104	22	186	8.45455	3.07973	0.00404002	0.190584	Up	0.069978	0.569928	12:8085525:8108972:1	Slc7a1
ENSRNOT00000001242	790.5	1174	407	0.346678	-1.52833	0.0133377	0.413505	Down	9.38	3.12225	12:31335372:31360254:1	Stx2
ENSRNOT00000001305	88	146	30	0.205479	-2.28293	0.0373839	0.767084	Down	0.726807	0.145269	12:2134022:2157403:1	Camsap3
ENSRNOT00000001331	144	33	255	7.72727	2.94996	0.0019016	0.111632	Up	0.261986	1.91867	12:12013911:12025549:-1	Nptx2
ENSRNOT00000001445	835	492	1178	2.39431	1.25961	0.0387744	0.779786	Up	4.02927	9.27018	12:37984790:38023368:1	Vps37b
ENSRNOT00000001579	3445.5	1191	5700	4.78589	2.25879	0.000153023	0.0155707	Up	4.93367	22.6837	20:10668411:10680283:-1	Sik1
ENSRNOT00000001588	147	50	244	4.88	2.28688	0.0124015	0.396248	Up	0.57098	2.67932	12:47748165:47793534:-1	Fam222a
ENSRNOT00000001636	2623.5	1232	4015	3.25893	1.7044	0.00350518	0.173874	Up	13.2675	41.5143	20:11700089:11721838:-1	Ube2g2
ENSRNOT00000001720	2468.5	532	4405	8.28008	3.04964	7.00579e-07	0.000153215	Up	4.15498	33.0318	12:16923990:16934706:-1	Mafk
ENSRNOT00000001783	1015.5	1491	540	0.362173	-1.46525	0.0147961	0.446929	Down	10.3795	3.60718	12:17913767:17972737:-1	Fam20c
ENSRNOT00000001863	682.5	405	960	2.37037	1.24511	0.0461782	0.86187	Up	5.0664	11.5301	12:18679789:18709397:1	Cyp3a62
ENSRNOT00000001874	131.5	240	23	0.0958333	-3.38333	0.000739474	0.0553685	Down	2.51966	0.236185	12:22122953:22125091:1	Irs3
ENSRNOT00000001875	10492	4972	16012	3.22043	1.68726	0.00670492	0.26931	Up	78.3854	242.417	12:41620393:41627741:-1	Sds
ENSRNOT00000001916	3058.5	47	6070	129.149	7.01289	9.34385e-21	3.70802e-17	Up	0.314268	39.3039	12:22641104:22651482:1	Serpine1
ENSRNOT00000001961	29263	13795	44731	3.24255	1.69713	0.0121575	0.391915	Up	116.862	363.894	12:23998411:24046814:-1	Por
ENSRNOT00000002046	128	44	212	4.81818	2.26849	0.0177329	0.499086	Up	0.935602	4.33503	1:76252330:76780230:-1	Sult2a2
ENSRNOT00000002119	645.5	371	920	2.47978	1.31021	0.0376461	0.769283	Up	4.53321	10.7841	11:17076980:17130120:-1	RGD1563888
ENSRNOT00000002121	331	119	543	4.56303	2.18999	0.00278109	0.14726	Up	1.86368	8.1467	11:16873646:16889201:-1	Btg3
ENSRNOT00000002151	2133	832	3434	4.1274	2.04523	0.000541915	0.0444325	Up	5.31652	21.0751	11:27364916:27398527:1	Bach1
ENSRNOT00000002187	4317	1856	6778	3.65194	1.86866	0.00160548	0.0971218	Up	8.71283	30.552	11:25342126:25350974:-1	Adamts1
ENSRNOT00000002247	3829	1480	6178	4.17432	2.06154	0.000517894	0.0431767	Up	8.4553	33.9037	11:36075709:36092495:1	Ets2
ENSRNOT00000002338	38	69	7	0.101449	-3.30117	0.042713	0.821233	Down	0.493949	0.0451674	11:74722819:74793673:-1	Opa1
ENSRNOT00000002346	1156.5	511	1802	3.52642	1.8182	0.00250697	0.137034	Up	7.31324	24.7443	11:74312806:74315248:-1	Hes1
ENSRNOT00000002355	333.5	139	528	3.79856	1.92545	0.00780537	0.296127	Up	1.20166	4.3961	11:73676601:73678984:-1	Fam43a
ENSRNOT00000002502	20	40	0	0	#NAME?	0.0128233	0.404515	Down	0.345698	2.06312e-10	4:181027212:181087530:1	Stk38l
ENSRNOT00000002522	534	765	303	0.396078	-1.33614	0.039603	0.782461	Down	4.66328	1.77283	11:80255790:80279075:1	Bcl6
ENSRNOT00000002599	5480	3321	7639	2.30021	1.20177	0.0408516	0.797812	Up	38.0637	84.0779	11:86421106:86422907:1	LOC100362453
ENSRNOT00000002705	1819	1105	2533	2.29231	1.1968	0.0386704	0.779775	Up	14.2745	31.4215	14:22251507:22445627:1	Ugt2a1
ENSRNOT00000002724	10407	5787	15027	2.59668	1.37667	0.0255862	0.617617	Up	61.012	152.135	14:22724399:22736148:1	Ugt2b10
ENSRNOT00000002771	215	353	77	0.21813	-2.19674	0.0070064	0.274512	Down	5.1739	1.08821	11:31770165:31772984:-1	Dnajc28
ENSRNOT00000002812	25	49	1	0.0204082	-5.61471	0.0165132	0.478783	Down	0.17324	0.00464918	11:31105799:31180642:-1	Synj1
ENSRNOT00000002936	261.5	14	509	36.3571	5.18417	1.47131e-08	5.61417e-06	Up	0.0959776	3.31146	14:10343282:10395047:-1	Gpat3
ENSRNOT00000002960	1071	611	1531	2.50573	1.32523	0.0262806	0.626921	Up	2.53118	6.09009	14:45142769:45165207:-1	Klf3
ENSRNOT00000002981	386	597	175	0.293132	-1.77038	0.0111971	0.371526	Down	1.33875	0.376237	14:34455934:34502218:1	Clock
ENSRNOT00000003060	38.5	70	7	0.1	-3.32193	0.0405689	0.795469	Down	0.942578	0.0963386	11:68142693:68197772:-1	Hspbap1
ENSRNOT00000003192	460.5	215	706	3.28372	1.71533	0.0108584	0.36532	Up	6.92185	21.8132	X:157759624:157773108:1	Mospd1
ENSRNOT00000003470	465.5	234	697	2.97863	1.57465	0.0186212	0.513835	Up	2.895	8.27212	14:17615968:17631714:1	Rchy1
ENSRNOT00000003567	63	15	111	7.4	2.88753	0.0250674	0.611042	Up	0.0731412	0.504543	13:67351087:67359335:1	Ptgs2
ENSRNOT00000003605	2627	1410	3844	2.72624	1.44691	0.012533	0.399165	Up	5.14919	13.4807	13:70658707:70783515:-1	Lamc1
ENSRNOT00000003686	209	50	368	7.36	2.87971	0.000671525	0.0514026	Up	0.414749	2.96091	14:18231860:18272484:1	Btc
ENSRNOT00000003745	17.5	1	34	34	5.08746	0.0486029	0.874323	Up	0.0261497	0.630044	14:18731378:18733391:-1	Cxcl2
ENSRNOT00000003778	6612.5	235	12990	55.2766	5.7886	1.04553e-15	2.59317e-12	Up	5.2393	278.217	14:18743685:18745457:-1	Cxcl1
ENSRNOT00000003895	47	92	2	0.0217391	-5.52356	0.00170539	0.101923	Down	0.749352	0.012455	X:16170576:16196691:1	Clcn5
ENSRNOT00000003932	3220	1315	5125	3.89734	1.96249	0.00087369	0.0628107	Up	10.7427	40.2073	13:82737159:82758004:-1	Atp1b1
ENSRNOT00000003940	1548.5	95	3002	31.6	4.98185	3.49607e-13	3.67303e-10	Up	2.26765	68.9984	10:106975178:106976040:-1	Socs3
ENSRNOT00000003992	1489	830	2148	2.58795	1.37181	0.0191266	0.521304	Up	5.17478	12.8559	10:61746082:61757514:1	Tsr1
ENSRNOT00000004010	756	1075	437	0.406512	-1.29863	0.0353565	0.749512	Down	6.02808	2.35261	10:35333859:35374355:1	Mapk9
ENSRNOT00000004026	826	225	1427	6.34222	2.66499	3.17377e-05	0.00414302	Up	0.741175	4.50515	10:10644572:10690223:1	Ppl
ENSRNOT00000004070	34429	7405	61453	8.29885	3.05291	2.49407e-05	0.00338954	Up	75.9045	604.877	6:132762280:132768379:1	Slc25a47
ENSRNOT00000004293	118.5	237	0	0	#NAME?	1.51301e-08	5.66436e-06	Down	2.32965	1.32392e-10	13:99005142:99034361:1	Acbd3
ENSRNOT00000004305	2296	4047	545	0.134668	-2.89252	2.18584e-06	0.000417033	Down	44.1022	5.70093	X:13114569:13116743:-1	Mid1ip1
ENSRNOT00000004359	160.5	261	60	0.229885	-2.12102	0.0163774	0.477071	Down	10.6436	2.36154	10:35737664:35739625:-1	Ltc4s
ENSRNOT00000004408	22565.5	672	44459	66.1592	6.04787	3.77485e-14	4.99337e-11	Up	5.41441	344.172	13:50913180:50916982:-1	Btg2
ENSRNOT00000004525	78.5	133	24	0.180451	-2.47032	0.0326087	0.71494	Down	0.27292	0.0479668	13:108132499:108178609:-1	Cenpf
ENSRNOT00000004713	74	11	137	12.4545	3.6386	0.00393851	0.187405	Up	0.0419533	0.481485	13:89622632:89634419:1	Adamts4
ENSRNOT00000004753	11075	18992	3158	0.166281	-2.58831	5.99104e-05	0.00724842	Down	91.9895	14.6875	10:46570996:46582854:-1	Srebf1
ENSRNOT00000004797	1363	1925	801	0.416104	-1.26498	0.0310043	0.693991	Down	27.4507	10.9664	9:82415605:82419288:-1	Tuba4a
ENSRNOT00000004842	1805.5	136	3475	25.5515	4.67533	2.88545e-12	2.29012e-09	Up	2.91881	71.5643	10:12995904:12997930:-1	Tnfrsf12a
ENSRNOT00000004864	26324.5	15172	37477	2.47014	1.30459	0.049026	0.879833	Up	124.05	294.258	13:80837420:80862963:-1	Fmo3
ENSRNOT00000004885	445	747	143	0.191432	-2.38509	0.000595889	0.0480635	Down	12.63	2.31758	10:34956052:34961349:-1	Hnrnpab
ENSRNOT00000004921	13	0	26	Inf	Inf	0.0434723	0.826314	Up	1.50118e-12	0.323439	X:104765492:104791210:-1	Sytl4
ENSRNOT00000005070	27.5	52	3	0.0576923	-4.11548	0.0370103	0.762574	Down	1.03548	0.0565312	10:29020049:29026002:-1	Pttg1
ENSRNOT00000005085	2811.5	1	5622	5622	12.4569	5.62238e-32	1.11559e-27	Up	0.0156315	59.0606	13:109817895:109849632:-1	Atf3
ENSRNOT00000005251	133	2	264	132	7.04439	7.64363e-08	2.29795e-05	Up	0.0362926	3.82621	13:61066153:61070599:-1	Rgs1
ENSRNOT00000005289	73	1	145	145	7.17991	2.17062e-05	0.00301185	Up	0.00959498	1.24571	13:44615553:44648620:1	Rab3gap1
ENSRNOT00000005296	100	0	200	Inf	Inf	1.35869e-07	3.69303e-05	Up	2.4883e-05	2.26077	13:73671412:73704480:-1	Tor1aip1
ENSRNOT00000005361	76.5	22	131	5.95455	2.57399	0.0282864	0.659528	Up	0.249348	1.43605	7:54247460:54249664:1	Phlda1
ENSRNOT00000005463	295.5	439	152	0.346241	-1.53015	0.0372294	0.764828	Down	2.34614	0.782593	7:33543828:33584564:-1	Nedd1
ENSRNOT00000005478	92	25	159	6.36	2.66903	0.015039	0.449558	Up	0.214762	1.30287	10:17261541:17291876:1	Sh3pxd2b
ENSRNOT00000005644	26.5	50	3	0.06	-4.05889	0.0418354	0.809852	Down	0.212315	0.0119146	10:82855613:82887497:-1	Itga3
ENSRNOT00000005677	386	207	565	2.72947	1.44862	0.0361099	0.753286	Up	2.1913	5.73704	13:74035080:74077783:-1	Soat1
ENSRNOT00000005746	374	95	653	6.87368	2.78108	0.00014412	0.0148939	Up	1.11722	7.41385	7:23544215:23594133:-1	Timp3
ENSRNOT00000005753	971.5	71	1872	26.3662	4.72062	1.38998e-11	9.84997e-09	Up	0.487076	12.3585	6:132735883:132747828:-1	Slc25a29
ENSRNOT00000005794	57	114	0	0	#NAME?	4.34653e-05	0.00542414	Down	6.19601	0.00149514	7:65005791:65008823:1	LOC100911956
ENSRNOT00000005800	931	499	1363	2.73146	1.44967	0.0166842	0.482577	Up	9.9708	26.1497	6:59948577:59950586:-1	Arl4a
ENSRNOT00000005803	2593	1451	3735	2.57409	1.36406	0.0183309	0.507284	Up	20.0183	49.4901	7:78005232:78040214:1	Dcaf13
ENSRNOT00000005829	3527	6101	953	0.156204	-2.6785	1.01462e-05	0.00156134	Down	66.3203	9.94745	7:67341080:67345308:-1	Avpr1a
ENSRNOT00000005857	35	67	3	0.0447761	-4.48113	0.0145849	0.442857	Down	0.481088	0.0191135	14:91895909:91904433:-1	Fignl1
ENSRNOT00000005863	3885	1615	6155	3.81115	1.93022	0.00110065	0.0735324	Up	10.8217	39.6064	6:41799749:41870046:-1	Lpin1
ENSRNOT00000005885	2154	1000	3308	3.308	1.72596	0.00317259	0.161412	Up	10.4754	33.2726	7:99954492:99961026:1	Trib1
ENSRNOT00000006006	160.5	0	321	Inf	Inf	1.82975e-10	9.30923e-08	Up	0.00219337	15.044	10:37130499:37130921:-1	Trappc2b
ENSRNOT00000006029	2638.5	1165	4112	3.52961	1.81951	0.00189924	0.111632	Up	10.427	35.3352	7:77987212:78004975:-1	Slc25a32
ENSRNOT00000006071	222	59	385	6.52542	2.70607	0.00105148	0.0712817	Up	0.446501	2.78894	14:63095720:63187009:1	Ppargc1a
ENSRNOT00000006157	201	311	91	0.292605	-1.77298	0.0299916	0.683229	Down	1.82845	0.513997	14:103181281:103321270:-1	Meis1
ENSRNOT00000006188	1923	435	3411	7.84138	2.97111	1.35114e-06	0.000279264	Up	3.84497	28.9244	7:102586313:102591237:1	Myc
ENSRNOT00000006200	2244.5	474	4015	8.47046	3.08244	5.64643e-07	0.000130275	Up	2.68003	21.8026	3:142748674:142752325:-1	Thbd
ENSRNOT00000006246	26.5	1	52	52	5.70044	0.0133584	0.413505	Up	0.0408523	1.49879	13:47739526:47743392:1	Il10
ENSRNOT00000006273	25.5	50	1	0.02	-5.64386	0.0153887	0.457099	Down	0.608203	0.0125977	7:102294803:102298522:-1	A1bg
ENSRNOT00000006345	35	5	65	13	3.70044	0.0325617	0.714701	Up	0.0203975	0.283502	19:37852833:37866355:1	Nrn1l
ENSRNOT00000006403	145	0	290	Inf	Inf	8.56098e-10	3.95039e-07	Up	0	1.28781	6:42180894:42286970:1	Rock2
ENSRNOT00000006416	20	0	40	Inf	Inf	0.0128233	0.404515	Up	3.57719e-10	1.82641	7:118816218:118816655:-1	Pole3
ENSRNOT00000006720	68	9	127	14.1111	3.81876	0.00384599	0.185224	Up	0.140165	1.88262	3:4861753:4866833:-1	Med22
ENSRNOT00000006784	28.5	57	0	0	#NAME?	0.0033893	0.170254	Down	0.824693	0	3:39595301:39596718:-1	Rprm
ENSRNOT00000006954	13.5	27	0	0	#NAME?	0.0396317	0.782461	Down	1.94859	3.8744e-42	3:18315320:18315610:1	AABR07051626.2
ENSRNOT00000007002	620.5	140	1101	7.86429	2.97532	1.02295e-05	0.00156134	Up	0.749303	5.64164	14:104581190:104612597:-1	Slc1a4
ENSRNOT00000007112	2086.5	706	3467	4.91076	2.29595	0.000119906	0.0128688	Up	2.68615	12.6722	6:145546595:145625236:1	Rapgef5
ENSRNOT00000007174	2335	1323	3347	2.52986	1.33906	0.0205548	0.541632	Up	11.0608	26.8787	6:7935771:7961207:-1	Abcg5
ENSRNOT00000007190	64	110	18	0.163636	-2.61143	0.0386253	0.779657	Down	0.673303	0.108184	7:73270455:73298097:1	Pop1
ENSRNOT00000007231	24.5	49	0	0	#NAME?	0.00633419	0.258076	Down	0.191045	0.0010725	7:42269784:42351054:1	Kitlg
ENSRNOT00000007259	4159	2253	6065	2.69197	1.42866	0.0144197	0.440855	Up	26.4523	68.3869	6:42854888:42858759:1	Odc1
ENSRNOT00000007321	456	186	726	3.90323	1.96467	0.00387992	0.186361	Up	0.895132	3.36483	13:75177965:75216933:1	Sec16b
ENSRNOT00000007367	1243.5	636	1851	2.91038	1.54121	0.00943811	0.335611	Up	11.0801	30.9783	X:15098904:15102340:1	Rbm3
ENSRNOT00000007379	546.5	804	289	0.359453	-1.47613	0.0229859	0.582485	Down	7.66264	2.64371	10:74243812:74298599:-1	Ypel2
ENSRNOT00000007492	2637	3721	1553	0.417361	-1.26063	0.0288532	0.667255	Down	21.358	8.55881	6:1548415:1622196:-1	Prkd3
ENSRNOT00000007548	648	994	302	0.303823	-1.7187	0.00699618	0.274512	Down	7.33211	2.1366	7:14486638:14515212:1	Cyp4f39
ENSRNOT00000007577	615.5	352	879	2.49716	1.32029	0.0375432	0.768704	Up	10.7598	25.791	4:170856751:170860225:-1	Mgp
ENSRNOT00000007583	2638.5	1517	3760	2.47858	1.30951	0.0233552	0.585858	Up	26.5454	63.201	6:104611026:104615302:1	Srsf5
ENSRNOT00000007621	1821.5	1068	2575	2.41105	1.26966	0.0285272	0.661258	Up	23.71	54.9073	10:37535871:37554664:-1	LOC103694903
ENSRNOT00000007698	3486	642	6330	9.85981	3.30156	1.17979e-07	3.2971e-05	Up	10.6911	101.172	4:97782512:97784842:-1	Gadd45a
ENSRNOT00000007879	3607.5	5899	1316	0.223089	-2.16431	0.000276187	0.0258495	Down	167.126	35.8054	13:112004140:112005052:-1	G0s2
ENSRNOT00000007949	1995	536	3454	6.44403	2.68796	9.4645e-06	0.0014787	Up	5.42521	33.5792	3:1452644:1468614:1	Il1rn
ENSRNOT00000008008	7391.5	847	13936	16.4534	4.04031	1.43119e-09	6.31061e-07	Up	8.04069	127.082	6:33689127:33691301:-1	Rhob
ENSRNOT00000008035	19	38	0	0	#NAME?	0.0150895	0.449558	Down	0.283065	1.82008e-05	15:10462749:10466496:1	Oxsm
ENSRNOT00000008045	1417.5	1967	868	0.441281	-1.18023	0.0433418	0.826314	Down	19.5161	8.26797	6:2216623:2280777:1	Rmdn2
ENSRNOT00000008416	468.5	671	266	0.396423	-1.33489	0.0444163	0.838543	Down	5.12936	1.95105	6:99356509:99361909:1	Akap5
ENSRNOT00000008492	21.5	42	1	0.0238095	-5.39232	0.0270316	0.637765	Down	0.480211	0.0128173	10:55626741:55632398:1	Aurkb
ENSRNOT00000008528	128	218	38	0.174312	-2.52026	0.00918539	0.332585	Down	0.498407	0.0835134	3:111699087:111759714:1	Mga
ENSRNOT00000008573	519	762	276	0.362205	-1.46512	0.0252032	0.612675	Down	3.51377	1.22203	6:99625306:99655362:1	Plekhg3
ENSRNOT00000008596	37	0	74	Inf	Inf	0.000890936	0.0633619	Up	8.99407e-10	0.763322	7:24043126:24102761:-1	Btbd11
ENSRNOT00000008705	186.5	0	373	Inf	Inf	1.67634e-11	1.10873e-08	Up	0.000212102	3.10006	X:68627329:68635593:1	Yipf6
ENSRNOT00000008752	164	328	0	0	#NAME?	1.3085e-10	7.01711e-08	Down	1.23225	5.15541e-06	15:8890578:8914501:-1	Thrb
ENSRNOT00000008898	66.5	18	115	6.38889	2.67557	0.0319391	0.704565	Up	0.215909	1.30267	5:107852129:107857320:-1	Cdkn2b
ENSRNOT00000009151	824.5	327	1322	4.04281	2.01536	0.00124689	0.0813839	Up	2.83947	11.0127	4:168472412:168517177:-1	Dusp16
ENSRNOT00000009173	661	995	327	0.328643	-1.60541	0.0112428	0.372422	Down	2.59061	0.818336	5:151904684:151977636:-1	Arid1a
ENSRNOT00000009202	2860	1710	4010	2.34503	1.22961	0.0329647	0.717902	Up	13.4622	30.3078	4:88694583:88718533:1	Ppm1k
ENSRNOT00000009228	441	251	631	2.51394	1.32995	0.0476125	0.870396	Up	0.766966	1.84845	5:47853818:47891127:1	Casp8ap2
ENSRNOT00000009233	48721.5	17100	80343	4.69842	2.23218	0.00230107	0.126827	Up	145.939	658.463	4:342302:350515:1	Insig1
ENSRNOT00000009299	279	442	116	0.262443	-1.92992	0.0105109	0.358139	Down	3.15319	0.792059	10:86399827:86409348:1	Grb7
ENSRNOT00000009319	1283.5	702	1865	2.6567	1.40963	0.01698	0.486874	Up	6.08627	15.5213	14:106008086:106061641:1	Peli1
ENSRNOT00000009482	918.5	530	1307	2.46604	1.30219	0.0311285	0.694771	Up	6.77273	16.0414	5:9430728:9432343:-1	Rrs1
ENSRNOT00000009584	3107	1271	4943	3.88906	1.95942	0.000883641	0.0630691	Up	8.91551	33.2896	5:64789456:64800810:1	Zfp189
ENSRNOT00000009749	19383.5	4655	34112	7.32803	2.87343	2.43016e-05	0.00334856	Up	51.6885	363.737	5:104984414:105010857:-1	Plin2
ENSRNOT00000009840	478.5	117	840	7.17949	2.84388	4.78819e-05	0.00590107	Up	1.24372	8.60584	3:147813473:147819571:-1	Trib3
ENSRNOT00000009897	41.5	81	2	0.0246914	-5.33985	0.00352459	0.174401	Down	1.17921	0.0230533	5:116996652:117038882:-1	Tm2d1
ENSRNOT00000009900	3226.5	4662	1791	0.38417	-1.38018	0.0172367	0.4921	Down	8.70144	3.21048	13:113373578:113571648:1	Plxna2
ENSRNOT00000010031	6692	1344	12040	8.95833	3.16323	6.82242e-07	0.000152102	Up	14.7037	126.48	7:18627808:18634079:-1	Angptl4
ENSRNOT00000010056	1173.5	627	1720	2.74322	1.45587	0.0143298	0.439054	Up	2.51301	6.61575	5:105230580:105279731:1	Acer2
ENSRNOT00000010073	743	428	1058	2.47196	1.30566	0.0347927	0.740725	Up	2.89532	6.86425	5:39251337:39257512:1	Ndufaf4
ENSRNOT00000010079	125.5	37	214	5.78378	2.53201	0.00937145	0.335042	Up	0.370597	2.05437	4:33743364:33761163:-1	Asns
ENSRNOT00000010171	464.5	14	915	65.3571	6.03027	1.09024e-12	9.40541e-10	Up	0.11441	7.3069	7:142912316:142920216:1	Nr4a1
ENSRNOT00000010242	377	612	142	0.232026	-2.10764	0.00298493	0.153836	Down	3.88206	0.863561	13:48745860:48766283:1	Slc45a3
ENSRNOT00000010271	2995	1790	4200	2.34637	1.23043	0.0329225	0.717902	Up	22.9584	51.7335	5:48501472:48504511:-1	Pnrc1
ENSRNOT00000010289	813.5	113	1514	13.3982	3.74397	2.99938e-08	1.00871e-05	Up	0.805294	10.3837	4:168752133:168755023:1	Apold1
ENSRNOT00000010296	115.5	192	39	0.203125	-2.29956	0.0205423	0.541632	Down	1.68951	0.330297	10:74959285:75028951:1	Rnf43
ENSRNOT00000010338	380.5	181	580	3.20442	1.68006	0.0160827	0.471272	Up	2.90742	8.97187	4:146779276:146839397:-1	Vgll4
ENSRNOT00000010377	71	139	3	0.0215827	-5.53398	0.000177733	0.0175451	Down	1.60524	0.0387325	4:78069978:78075398:-1	Zfp467
ENSRNOT00000010381	883.5	1417	350	0.247001	-2.01741	0.00113378	0.0754917	Down	14.0469	3.3355	3:110306067:110324084:-1	Bmf
ENSRNOT00000010591	1362.5	593	2132	3.59528	1.8461	0.00195958	0.114023	Up	12.0384	41.5317	5:24410863:24416888:1	Tp53inp1
ENSRNOT00000010636	217	348	86	0.247126	-2.01668	0.0124467	0.397055	Down	1.32669	0.314078	7:25039335:25113664:1	Nuak1
ENSRNOT00000010639	3775.5	6056	1495	0.246863	-2.01822	0.000662141	0.0513211	Down	80.8994	19.1729	7:70807867:70815270:1	Stac3
ENSRNOT00000010712	488.5	16	961	60.0625	5.90839	1.20928e-12	9.99772e-10	Up	0.206535	11.9988	6:109300433:109303299:1	Fos
ENSRNOT00000010762	2319.5	913	3726	4.08105	2.02894	0.000588037	0.047819	Up	7.95939	31.2074	3:148259596:148313810:-1	Bcl2l1
ENSRNOT00000010898	401.5	607	196	0.3229	-1.63084	0.0180025	0.500566	Down	3.40236	1.05639	4:89183768:89281222:-1	Fam13a
ENSRNOT00000011032	742.5	1046	439	0.419694	-1.25259	0.0426239	0.820313	Down	9.63379	3.87744	4:78233332:78236781:1	Repin1
ENSRNOT00000011163	204.5	314	95	0.302548	-1.72477	0.0336116	0.724128	Down	2.56554	0.742184	19:25391700:25394229:1	LOC100359539
ENSRNOT00000011166	1258.5	553	1964	3.55154	1.82844	0.00225187	0.125533	Up	2.32318	7.92969	4:22339831:22425381:-1	Abcb4
ENSRNOT00000011270	989	463	1515	3.27214	1.71023	0.00483059	0.21539	Up	3.54874	11.1481	7:120067379:120071440:1	Cdc42ep1
ENSRNOT00000011314	50	1	99	99	6.62936	0.000473175	0.0399521	Up	0.0302534	5.48865	5:16706082:16706909:-1	Rps20
ENSRNOT00000011330	6874	3657	10091	2.75937	1.46434	0.0145725	0.442857	Up	65.231	172.837	5:29573898:29601748:-1	Decr1
ENSRNOT00000011347	2365	1240	3490	2.81452	1.49289	0.0101098	0.347659	Up	6.21252	16.7902	8:111210811:111226193:1	Amotl2
ENSRNOT00000011392	3314.5	1511	5118	3.38716	1.76008	0.00267097	0.143182	Up	18.0929	58.8487	5:138466293:138470096:-1	Ppcs
ENSRNOT00000011511	256.5	133	380	2.85714	1.51457	0.0462238	0.86187	Up	2.30907	6.34377	7:26472288:26478189:-1	RGD1563365
ENSRNOT00000011521	490	227	753	3.31718	1.72996	0.00942103	0.335605	Up	1.78643	5.68988	4:113948514:113951847:1	Mogs
ENSRNOT00000011714	1267.5	707	1828	2.58557	1.37048	0.0202598	0.536708	Up	3.44169	8.54665	5:62212982:62260105:-1	Tbc1d2
ENSRNOT00000011731	4290.5	1700	6881	4.04765	2.01708	0.000700446	0.0531782	Up	11.3679	44.1789	5:114011189:114014277:-1	Jun
ENSRNOT00000011784	6842.5	2601	11084	4.26144	2.09134	0.00062008	0.0495444	Up	55.2168	225.926	10:13797562:13810913:1	Eci1
ENSRNOT00000011890	46	89	3	0.0337079	-4.89077	0.00368835	0.179814	Down	0.800636	0.0282129	2:100226328:100372252:-1	Hnf4g
ENSRNOT00000011904	59.5	17	102	6	2.58496	0.0465897	0.864763	Up	0.147571	0.830367	7:94375020:94383024:1	Nov
ENSRNOT00000012124	476	714	238	0.333333	-1.58496	0.0174434	0.49614	Down	5.3079	1.69657	6:127282466:127301083:1	Otub2
ENSRNOT00000012136	4298.5	2310	6287	2.72165	1.44448	0.0135169	0.417112	Up	28.9458	75.669	4:145377483:145390497:-1	Cidec
ENSRNOT00000012212	28.5	0	57	Inf	Inf	0.0033893	0.170254	Up	0	0.299989	4:170659998:170740274:-1	Gucy2c
ENSRNOT00000012263	90	180	0	0	#NAME?	4.77256e-07	0.000115484	Down	2.61016	3.28817e-05	5:135413275:135438869:1	Gpbp1l1
ENSRNOT00000012314	332.5	98	567	5.78571	2.5325	0.000642752	0.0509365	Up	0.713523	3.95028	5:143111074:143120165:-1	Zc3h12a
ENSRNOT00000012328	1584	636	2532	3.98113	1.99318	0.000809259	0.058818	Up	3.35923	12.8313	5:159845774:159874206:1	Epha2
ENSRNOT00000012348	14.5	29	0	0	#NAME?	0.0330694	0.717902	Down	0.896192	1.98317e-05	8:85503224:85514670:1	Gsta4
ENSRNOT00000012365	265	81	449	5.54321	2.47072	0.0015491	0.094286	Up	1.25482	6.72316	4:119225040:119230728:1	Bmp10
ENSRNOT00000012436	78.5	157	0	0	#NAME?	2.15695e-06	0.000415517	Down	1.72228	8.06906e-10	10:105123857:105149971:-1	Srp68
ENSRNOT00000012463	206.5	12	401	33.4167	5.0625	1.75419e-07	4.64087e-05	Up	0.0551648	1.83233	5:151436464:151448328:1	Map3k6
ENSRNOT00000012490	443.5	685	202	0.294891	-1.76175	0.00948221	0.335975	Down	6.14825	1.7435	4:78981987:79003053:1	Ccdc126
ENSRNOT00000012519	314	528	100	0.189394	-2.40054	0.00131837	0.0832481	Down	4.80135	0.874253	5:50438576:50638136:-1	Mob3b
ENSRNOT00000012606	1424	699	2149	3.07439	1.6203	0.00608989	0.252287	Up	3.11709	9.20304	3:159995064:160013274:1	Ttpal
ENSRNOT00000012617	283.5	133	434	3.26316	1.70627	0.0221336	0.571098	Up	0.815843	2.5482	3:9410661:9448167:-1	Abl1
ENSRNOT00000012681	2902	4437	1367	0.308091	-1.69857	0.00362801	0.178186	Down	60.2473	17.8295	5:134469270:134484839:-1	Cyp4a2
ENSRNOT00000012760	4156.5	604	7709	12.7632	3.67392	8.0907e-09	3.14776e-06	Up	7.9249	97.2047	4:30546664:30556814:-1	Pdk4
ENSRNOT00000012826	5009	7410	2608	0.351957	-1.50653	0.0106028	0.36024	Down	90.3944	30.555	8:47511719:47529689:-1	Oaf
ENSRNOT00000012883	6294.5	2815	9774	3.47211	1.79581	0.00284746	0.149866	Up	21.3291	71.1127	7:99609191:99624732:1	Sqle
ENSRNOT00000012977	2643	1331	3955	2.97145	1.57117	0.0068942	0.273043	Up	14.2182	40.5804	5:119546461:119564846:-1	Cyp2j4
ENSRNOT00000013119	17	0	34	Inf	Inf	0.0212047	0.554792	Up	0	0.394254	8:5734348:5742243:1	Mmp10
ENSRNOT00000013343	926.5	450	1403	3.11778	1.64052	0.00708702	0.275727	Up	1.79498	5.37565	2:138819960:138833933:-1	Pcdh18
ENSRNOT00000013362	866	481	1251	2.60083	1.37897	0.0235378	0.588259	Up	3.03153	7.57523	1:174767960:174786361:1	Wee1
ENSRNOT00000013431	584	301	867	2.8804	1.52627	0.0176775	0.498943	Up	2.38628	6.59227	6:107428508:107431116:1	RGD1307704
ENSRNOT00000013515	2750.5	946	4555	4.81501	2.26754	0.000139008	0.0145852	Up	8.22336	38.0425	6:107460668:107467487:1	Acot2
ENSRNOT00000013516	463.5	90	837	9.3	3.21723	7.08736e-06	0.00118174	Up	0.707433	6.34038	6:109913757:109935533:-1	Tgfb3
ENSRNOT00000013727	1148	531	1765	3.32392	1.73288	0.00388838	0.186361	Up	3.79976	12.1236	4:145580799:145587845:1	Vhl
ENSRNOT00000013745	228.5	105	352	3.35238	1.74519	0.0268382	0.633956	Up	2.93381	9.43268	X:1364786:1369384:-1	Timp1
ENSRNOT00000013753	1222.5	611	1834	3.00164	1.58575	0.00770803	0.292994	Up	4.88629	14.0903	6:107517668:107522952:1	Acot4
ENSRNOT00000013851	1756.5	85	3428	40.3294	5.33376	1.52807e-14	3.36889e-11	Up	1.34986	52.5018	1:157646173:157660008:1	Rab30
ENSRNOT00000013930	12.5	0	25	Inf	Inf	0.0477266	0.870396	Up	0	0.0995969	5:61474000:61542653:1	Ccdc180
ENSRNOT00000014028	378.5	750	7	0.00933333	-6.74339	4.90037e-13	4.41969e-10	Down	5.26099	0.0451786	4:156403016:156426760:-1	Pex5
ENSRNOT00000014034	276.5	414	139	0.335749	-1.57455	0.0350917	0.745294	Down	7.76283	2.49867	2:263895290:263975834:1	Ptger3
ENSRNOT00000014073	116306	48729	183884	3.77361	1.91594	0.020408	0.539194	Up	489.259	1773	6:128073344:128080878:1	LOC299282
ENSRNOT00000014135	69	126	12	0.0952381	-3.39232	0.00797028	0.300658	Down	0.542276	0.049984	8:22792000:22821223:-1	Kank2
ENSRNOT00000014158	129	20	238	11.9	3.57289	0.000462976	0.0394264	Up	0.0999528	1.13394	6:107636856:107678156:-1	Elmsan1
ENSRNOT00000014267	64	111	17	0.153153	-2.70695	0.0328718	0.717902	Down	1.96125	0.294931	2:88217188:88227479:1	Car1
ENSRNOT00000014309	499.5	278	721	2.59353	1.37491	0.0364544	0.757244	Up	3.35368	8.36076	3:164665532:164711848:1	Ptpn1
ENSRNOT00000014317	30	4	56	14	3.80735	0.0407329	0.79639	Up	0.00939781	0.125055	2:139453774:139528162:-1	Slc7a11
ENSRNOT00000014348	1572.5	870	2275	2.61494	1.38678	0.0176351	0.498455	Up	6.88574	17.2923	2:140286661:140306869:1	Noct
ENSRNOT00000014489	106	184	28	0.152174	-2.71621	0.00926235	0.33476	Down	1.39154	0.201711	3:2480232:2487710:1	Tprn
ENSRNOT00000014533	412	172	652	3.7907	1.92246	0.00550321	0.236352	Up	2.16871	7.90806	2:232128235:232137422:1	Tifa
ENSRNOT00000014595	1495.5	2143	848	0.395707	-1.3375	0.0222038	0.572166	Down	7.91483	3.00592	3:164937198:164964702:-1	Adnp
ENSRNOT00000014664	195.5	299	92	0.307692	-1.70044	0.0384347	0.777392	Down	1.66154	0.493136	3:112663383:112676556:-1	Cdan1
ENSRNOT00000014739	274	103	445	4.32039	2.11116	0.00564337	0.23961	Up	1.17806	4.87766	X:110226572:110232179:-1	Serpina7
ENSRNOT00000014770	191.5	291	92	0.316151	-1.66131	0.0440896	0.835065	Down	1.92077	0.581682	8:115069095:115076130:1	Dusp7
ENSRNOT00000014809	519	264	774	2.93182	1.5518	0.0180352	0.500566	Up	2.1776	6.1395	16:54460067:54513349:-1	Slc7a2
ENSRNOT00000014934	475.5	264	687	2.60227	1.37977	0.0374438	0.76752	Up	4.39038	10.9601	5:165405168:165408320:1	Srm
ENSRNOT00000014939	479.5	107	852	7.96262	2.99324	2.13026e-05	0.00299777	Up	0.699624	5.3422	9:65701413:65737538:-1	Trak2
ENSRNOT00000015017	4429	2566	6292	2.45207	1.294	0.0265212	0.628714	Up	22.3154	52.5411	1:251045440:251071040:1	Minpp1
ENSRNOT00000015034	2742.5	1071	4414	4.12138	2.04313	0.000538368	0.0444325	Up	3.67882	14.5615	9:65698712:65763273:-1	Trak2
ENSRNOT00000015119	804.5	384	1225	3.1901	1.6736	0.00685716	0.27212	Up	1.72453	5.28325	2:148608056:148655261:1	Tsc22d2
ENSRNOT00000015172	290.5	490	91	0.185714	-2.42884	0.00143443	0.0892225	Down	3.68439	0.659088	18:35683185:35817117:-1	Mcc
ENSRNOT00000015179	3344	1953	4735	2.42448	1.27767	0.0271796	0.639737	Up	7.65208	17.8188	15:3455211:3544685:-1	Vcl
ENSRNOT00000015185	438	191	685	3.58639	1.84253	0.00694447	0.273941	Up	0.782688	2.69404	2:91450162:91497091:-1	Pcsk1
ENSRNOT00000015281	885.5	1280	491	0.383594	-1.38235	0.0228953	0.581674	Down	12.0388	4.43209	5:61382351:61387358:1	Aldh1b1
ENSRNOT00000015308	467	242	692	2.8595	1.51576	0.0231946	0.583304	Up	2.72968	7.48356	6:136150791:136156781:1	LOC103692719
ENSRNOT00000015316	3710	627	6793	10.8341	3.43751	4.4288e-08	1.39486e-05	Up	11.6901	121.603	4:85381889:85386231:-1	Inmt
ENSRNOT00000015322	27.5	53	2	0.0377358	-4.72792	0.0226645	0.579553	Down	0.913129	0.0414095	4:9981958:10002247:1	Napepld
ENSRNOT00000015333	565	324	806	2.48765	1.31479	0.0408991	0.797955	Up	3.93026	9.40059	6:136276057:136279399:-1	Bag5
ENSRNOT00000015387	1229.5	705	1754	2.48794	1.31495	0.0259827	0.623985	Up	6.18526	14.7812	2:157316266:157341469:1	Tiparp
ENSRNOT00000015525	2360.5	1164	3557	3.05584	1.61157	0.00565393	0.23961	Up	12.2702	35.9936	17:12261102:12276315:1	Nfil3
ENSRNOT00000015576	1450.5	886	2015	2.27427	1.1854	0.042229	0.814293	Up	4.87286	10.6482	5:74941802:74982401:1	Akap2
ENSRNOT00000015763	772.5	208	1337	6.42788	2.68434	3.2572e-05	0.00422414	Up	1.97527	12.218	2:157747542:157759819:-1	Ccnl1
ENSRNOT00000015845	1726.5	1032	2421	2.34593	1.23016	0.0339751	0.729582	Up	5.13806	11.5763	1:126749508:126947392:1	Pcsk6
ENSRNOT00000015918	191	68	314	4.61765	2.20716	0.00878096	0.322055	Up	0.32137	1.43348	9:20546159:20621051:-1	Tnfrsf21
ENSRNOT00000016016	1147	384	1910	4.97396	2.31439	0.000158549	0.0160507	Up	3.74896	17.8936	2:157747542:157759838:-1	Ccnl1
ENSRNOT00000016152	484.5	814	155	0.190418	-2.39276	0.000470089	0.0398612	Down	5.26617	0.962458	1:229003961:229019527:1	Fam111a
ENSRNOT00000016184	22	43	1	0.0232558	-5.42626	0.0251886	0.612675	Down	0.593644	0.0105962	19:33083412:33084915:1	Rbmxl1
ENSRNOT00000016230	806	370	1242	3.35676	1.74707	0.00485498	0.215419	Up	2.10222	6.7786	5:144769452:144779212:-1	Ncdn
ENSRNOT00000016237	16518	6042	26994	4.46773	2.15954	0.000955048	0.0671988	Up	50.8128	217.991	9:37223729:37231291:-1	Ptp4a1
ENSRNOT00000016462	1487	861	2113	2.45412	1.29521	0.0266713	0.630766	Up	8.40301	19.8086	19:597427:601469:-1	Pdp2
ENSRNOT00000016540	37013	54194	19832	0.365945	-1.4503	0.0354462	0.750613	Down	908.514	319.267	1:162381253:162385575:-1	Thrsp
ENSRNOT00000016621	190.5	309	72	0.23301	-2.10154	0.0122886	0.393911	Down	2.12046	0.473826	2:157869392:158156150:-1	Veph1
ENSRNOT00000016699	1623	2324	922	0.39673	-1.33377	0.0221179	0.571098	Down	27.0287	10.298	4:100222106:100228809:-1	Rnf181
ENSRNOT00000016742	79	0	158	Inf	Inf	2.01711e-06	0.000392388	Up	3.22287e-06	3.34094	10:37441284:37455022:-1	Ube2b
ENSRNOT00000016783	14	28	0	0	#NAME?	0.0361799	0.753286	Down	0.823662	2.58049e-05	1:162519521:162533893:-1	Aamdc
ENSRNOT00000016856	1009.5	561	1458	2.59893	1.37792	0.0216642	0.562674	Up	3.5453	8.85113	9:60399304:60430139:-1	Stk17b
ENSRNOT00000016891	11344	6247	16441	2.63182	1.39606	0.0245473	0.60206	Up	40.8304	103.191	2:243701962:243721816:1	Adh4
ENSRNOT00000016933	53.5	107	0	0	#NAME?	7.25172e-05	0.00835433	Down	0.920359	0.000467148	9:38471716:38495126:-1	Rab23
ENSRNOT00000017005	742.5	1109	376	0.339044	-1.56045	0.0122332	0.392769	Down	1.68873	0.549981	19:38446059:38533735:-1	Nfat5
ENSRNOT00000017046	287.5	445	130	0.292135	-1.77529	0.0171619	0.490672	Down	2.11596	0.592794	5:60538931:60558335:-1	Zbtb5
ENSRNOT00000017181	2209	20	4398	219.9	7.7807	6.26089e-23	4.14095e-19	Up	0.212594	44.935	7:120580743:120592095:1	Maff
ENSRNOT00000017232	1791.5	991	2592	2.61554	1.38711	0.0171034	0.489704	Up	5.55471	13.9444	4:10323607:10329241:-1	Fgl2
ENSRNOT00000017319	719.5	1089	350	0.321396	-1.63758	0.00898116	0.32698	Down	34.0808	10.5285	3:176691329:176692271:1	Ppdpf
ENSRNOT00000017330	60.5	107	14	0.130841	-2.93411	0.0255034	0.616367	Down	2.33823	0.300381	8:36763481:36764422:-1	Hyls1
ENSRNOT00000017337	58.5	102	15	0.147059	-2.76553	0.0361463	0.753286	Down	0.980344	0.13702	3:176698305:176706896:-1	Ptk6
ENSRNOT00000017363	624.5	74	1175	15.8784	3.98899	1.87181e-08	6.81997e-06	Up	0.552705	8.40304	8:104840940:104912959:-1	Spsb4
ENSRNOT00000017384	430	622	238	0.382637	-1.38595	0.0402207	0.791726	Down	4.40829	1.61687	4:126617244:126644895:-1	Lrig1
ENSRNOT00000017396	1073	1616	530	0.32797	-1.60836	0.00743962	0.285526	Down	9.95406	3.13575	2:140541619:140552220:1	Rab33b
ENSRNOT00000017493	12.5	25	0	0	#NAME?	0.0477266	0.870396	Down	0.200484	2.37118e-20	8:22980908:23000485:-1	Rgl3
ENSRNOT00000017629	855	1229	481	0.391375	-1.35338	0.0263508	0.626921	Down	6.33744	2.3803	19:10079765:10101451:-1	Mmp15
ENSRNOT00000017668	45.5	86	5	0.0581395	-4.10434	0.00997477	0.347227	Down	0.798618	0.0492737	3:176709743:176716146:-1	Srms
ENSRNOT00000017718	39.5	79	0	0	#NAME?	0.000603252	0.0484604	Down	0.553959	0.00291523	1:59297294:59347472:-1	LOC100912445
ENSRNOT00000017742	513.5	776	251	0.323454	-1.62837	0.013454	0.415817	Down	7.20634	2.23526	3:142383278:142387481:1	Foxa2
ENSRNOT00000017765	104	32	176	5.5	2.45943	0.0178513	0.499232	Up	0.127167	0.675889	15:71772777:71779033:-1	Pcdh20
ENSRNOT00000017805	1763.5	690	2837	4.11159	2.0397	0.000592038	0.0479478	Up	4.3175	17.0356	2:112868662:112933675:1	Nceh1
ENSRNOT00000017857	122	200	44	0.22	-2.18442	0.0242095	0.598113	Down	1.40689	0.294925	15:33224896:33250546:-1	RGD1565222
ENSRNOT00000017949	1109.5	635	1584	2.49449	1.31874	0.0265941	0.629689	Up	5.80169	13.8908	10:66586924:66602987:-1	Wsb1
ENSRNOT00000017955	2204	1371	3037	2.21517	1.14742	0.0463442	0.862628	Up	8.24682	17.5474	17:49610548:49617065:1	Yae1d1
ENSRNOT00000018064	13.5	0	27	Inf	Inf	0.0396317	0.782461	Up	1.36547e-07	0.430298	5:155649217:155668057:1	Wnt4
ENSRNOT00000018252	2960	1755	4165	2.37322	1.24685	0.0307013	0.689892	Up	33.2562	75.79	17:13391467:13393243:-1	Gadd45g
ENSRNOT00000018318	3219.5	4853	1586	0.326808	-1.61348	0.00566359	0.23961	Down	38.9826	12.2377	2:218654554:218658761:-1	S1pr1
ENSRNOT00000018368	21.5	43	0	0	#NAME?	0.0101092	0.347659	Down	0.824069	2.57286e-11	18:52031842:52047816:-1	LOC100174910
ENSRNOT00000018447	120322	184289	56355	0.305797	-1.70935	0.0382858	0.775962	Down	850.541	249.767	1:264160129:264172729:-1	Scd1
ENSRNOT00000018488	640	362	918	2.53591	1.3425	0.0335345	0.724039	Up	3.68256	8.97013	2:148874151:148891900:-1	Siah2
ENSRNOT00000018497	39.5	75	4	0.0533333	-4.22882	0.0132821	0.413078	Down	0.867736	0.0407093	1:174330695:174339494:1	Akip1
ENSRNOT00000018511	307.5	135	480	3.55556	1.83007	0.0127358	0.404325	Up	0.586776	2.00342	18:32594958:32609864:1	Spry4
ENSRNOT00000018584	180.5	299	62	0.207358	-2.26981	0.00818272	0.306922	Down	1.52528	0.302547	3:119805941:119809987:1	Adra2b
ENSRNOT00000018629	791	1144	438	0.382867	-1.38508	0.0243487	0.599584	Down	4.54271	1.6685	19:23389375:23405039:1	Sall1
ENSRNOT00000018639	17.5	0	35	Inf	Inf	0.0194418	0.522008	Up	0.00409527	0.592031	1:128637049:128687893:1	Ttc23
ENSRNOT00000018696	331	157	505	3.21656	1.68552	0.0190876	0.520957	Up	0.986529	3.04206	1:84018859:84040433:-1	Itpkc
ENSRNOT00000018763	21.5	0	43	Inf	Inf	0.0101092	0.347659	Up	7.48455e-06	0.759925	1:233124139:233145924:-1	Psat1
ENSRNOT00000018776	402.5	135	670	4.96296	2.3112	0.00106364	0.0717848	Up	3.1276	14.944	3:11414186:11417546:-1	Lcn2
ENSRNOT00000018843	33.5	66	1	0.0151515	-6.04439	0.00491034	0.216995	Down	0.500668	0.00733533	18:31816155:32207801:-1	Arhgap26
ENSRNOT00000018889	691.5	159	1224	7.69811	2.9445	8.96417e-06	0.00141164	Up	1.3559	10.0324	1:274245184:274258595:1	Dusp5
ENSRNOT00000018986	316.5	494	139	0.281377	-1.82943	0.0121869	0.391915	Down	3.26326	0.882093	10:66942398:67048308:1	Rab11fip4
ENSRNOT00000019004	2287.5	437	4138	9.46911	3.24323	1.72368e-07	4.6218e-05	Up	3.70455	33.6913	5:156086497:156141537:-1	Alpl
ENSRNOT00000019033	3764	2173	5355	2.46434	1.3012	0.0249427	0.609724	Up	70.2357	166.199	16:75873881:75874519:-1	Map1lc3b2
ENSRNOT00000019052	315	126	504	4	2	0.00650947	0.262537	Up	2.47092	9.46926	16:19223087:19225037:-1	Klf2
ENSRNOT00000019080	12501	4111	20891	5.08173	2.34532	0.000274374	0.0258016	Up	39.8273	194.346	5:140642885:140657745:-1	Mfsd2a
ENSRNOT00000019171	21.5	43	0	0	#NAME?	0.0101092	0.347659	Down	0.436641	1.86852e-13	5:160570511:160620334:-1	Tmem51
ENSRNOT00000019192	3237	1346	5128	3.80981	1.92972	0.00105259	0.0712817	Up	17.7549	64.9482	19:14508616:14515456:1	Hmox1
ENSRNOT00000019272	198.5	339	58	0.171091	-2.54716	0.00258969	0.140395	Down	2.74466	0.446578	17:51898217:51912496:-1	Inhba
ENSRNOT00000019305	738	1062	414	0.389831	-1.35908	0.0283534	0.659541	Down	6.89806	2.58186	2:151314818:151320319:1	P2ry1
ENSRNOT00000019346	4688	1839	7537	4.09842	2.03507	0.000659674	0.0513211	Up	8.30501	32.6876	4:154309426:154359137:1	LOC100911545
ENSRNOT00000019367	2511.5	1463	3560	2.43336	1.28295	0.0262212	0.626845	Up	12.0448	28.1511	1:240908483:240933198:1	Klf9
ENSRNOT00000019386	38754.5	11858	65651	5.53643	2.46896	0.000573952	0.0468657	Up	98.4374	523.346	3:160872503:160891190:-1	Sdc4
ENSRNOT00000019392	139.5	41	238	5.80488	2.53727	0.00699097	0.274512	Up	0.536583	3.01168	3:111160205:111163425:1	Chac1
ENSRNOT00000019408	266	399	133	0.333333	-1.58496	0.0356736	0.753016	Down	0.736869	0.234994	19:42758127:42920344:-1	Zfhx3
ENSRNOT00000019473	180	77	283	3.67532	1.87787	0.0264578	0.627962	Up	0.440248	1.55381	17:13799383:13812615:-1	S1pr3
ENSRNOT00000019501	2193.5	139	4248	30.5612	4.93363	2.68721e-13	3.13645e-10	Up	1.44932	42.4675	2:251529354:251532312:-1	Cyr61
ENSRNOT00000019646	122.5	48	197	4.10417	2.03709	0.0342519	0.733754	Up	0.678368	2.69055	15:41643541:41645685:1	Arl11
ENSRNOT00000019652	23955	8522	39388	4.62192	2.20849	0.00107465	0.072158	Up	40.6765	180.541	1:218569510:218629678:1	Cpt1a
ENSRNOT00000019673	613.5	328	899	2.74085	1.45463	0.0224686	0.577488	Up	3.08841	8.1305	9:46996156:47035369:1	Il1r1
ENSRNOT00000019698	377.5	168	587	3.49405	1.8049	0.0101332	0.34786	Up	1.60839	5.41284	9:71443588:71445739:-1	Fzd5
ENSRNOT00000019795	3995.5	5632	2359	0.418857	-1.25547	0.0306109	0.688641	Down	69.5704	27.9817	5:58121786:58124681:-1	Sigmar1
ENSRNOT00000019853	77	0	154	Inf	Inf	2.63947e-06	0.00048493	Up	1.05515e-05	3.25803	7:117709168:117721955:-1	Cyhr1
ENSRNOT00000019925	12.5	0	25	Inf	Inf	0.0477266	0.870396	Up	0	1.28233	10:58784660:58785043:1	LOC100912483
ENSRNOT00000020012	3844.5	1707	5982	3.50439	1.80916	0.00212807	0.119958	Up	10.4753	35.2605	17:57074525:57090888:1	Crem
ENSRNOT00000020043	578	143	1013	7.08392	2.82455	3.01267e-05	0.00403229	Up	0.849275	5.77888	10:58810058:58834538:-1	Slc13a5
ENSRNOT00000020049	1835	2685	985	0.366853	-1.44673	0.0129635	0.407032	Down	19.8263	6.98329	9:81615253:81634531:1	Pnkd
ENSRNOT00000020079	1491	2347	635	0.270558	-1.88599	0.0015092	0.0935796	Down	20.0699	5.21402	1:94579080:94587219:1	LOC690000
ENSRNOT00000020204	40	78	2	0.025641	-5.2854	0.00430244	0.19946	Down	1.19508	0.0231593	17:57040023:57088502:1	Crem
ENSRNOT00000020206	14664.5	6858	22471	3.27661	1.7122	0.00731532	0.282541	Up	45.1792	142.162	3:11442397:11452529:-1	Slc25a25
ENSRNOT00000020220	5378.5	3220	7537	2.34068	1.22693	0.036737	0.7601	Up	21.7383	48.8655	17:78489668:78561613:-1	Fam107b
ENSRNOT00000020229	1488.5	384	2593	6.7526	2.75544	7.36802e-06	0.00119059	Up	3.43312	22.2358	1:141474180:141481315:-1	Pex11a
ENSRNOT00000020476	9820.5	4907	14734	3.00265	1.58624	0.0102024	0.349632	Up	17.4915	50.4374	9:119517101:119591533:1	Lpin2
ENSRNOT00000020528	1456	192	2720	14.1667	3.82443	3.3788e-09	1.42643e-06	Up	1.7015	23.1236	1:21851660:21854773:-1	Ctgf
ENSRNOT00000020536	1764	1039	2489	2.39557	1.26037	0.0298272	0.681049	Up	8.60456	19.79	9:61720583:61744531:1	Mob4
ENSRNOT00000020573	404.5	597	212	0.355109	-1.49367	0.029368	0.675057	Down	1.06916	0.365102	8:49114990:49158971:-1	Kmt2a
ENSRNOT00000020757	22	44	0	0	#NAME?	0.00934839	0.335042	Down	0.703272	0.000210148	1:69823107:69835185:-1	Sass6
ENSRNOT00000020826	575.5	14	1137	81.2143	6.34366	2.15851e-14	3.51222e-11	Up	0.176922	13.8665	5:25349928:25353661:1	Gem
ENSRNOT00000020838	87	0	174	Inf	Inf	7.02677e-07	0.000153215	Up	0	1.09512	19:52147127:52186260:-1	Mbtps1
ENSRNOT00000020858	42	2	82	41	5.35755	0.00329835	0.166954	Up	0.0260882	1.32441	18:81569910:81590887:1	Fam69c
ENSRNOT00000021022	769.5	448	1091	2.43527	1.28408	0.036991	0.762574	Up	3.10666	7.26286	17:15603929:15643437:-1	Ippk
ENSRNOT00000021073	1757	696	2818	4.04885	2.01751	0.000673555	0.0514026	Up	14.0755	54.7392	16:19385736:19399903:-1	Tpm4
ENSRNOT00000021152	896.5	1363	430	0.315481	-1.66438	0.00650718	0.262537	Down	43.6446	13.2185	9:79491754:79545024:-1	Mreg
ENSRNOT00000021156	33.5	64	3	0.046875	-4.41504	0.0175922	0.497953	Down	0.768574	0.0310928	2:123275881:123282214:-1	Ccna2
ENSRNOT00000021223	374	545	203	0.372477	-1.42478	0.0404417	0.795287	Down	2.47897	0.888483	1:78459543:78521999:-1	Arhgap35
ENSRNOT00000021226	229	85	373	4.38824	2.13364	0.0075756	0.289624	Up	0.815508	3.45178	1:259376933:259484569:-1	Sorbs1
ENSRNOT00000021284	521.5	282	761	2.69858	1.4322	0.0284013	0.659881	Up	22.304	57.8345	4:179481263:179481603:1	Lyrm5
ENSRNOT00000021347	41.5	75	8	0.106667	-3.22882	0.0387889	0.779786	Down	0.71316	0.0731139	1:259376933:259484569:-1	Sorbs1
ENSRNOT00000021430	731	1022	440	0.430528	-1.21582	0.0493348	0.883485	Down	11.6709	4.82526	15:55126953:55128761:1	Lpar6
ENSRNOT00000021496	1465.5	2128	803	0.37735	-1.40603	0.0165007	0.478783	Down	8.4451	3.06165	1:243276403:243398536:1	Kank1
ENSRNOT00000021527	65	122	8	0.0655738	-3.93074	0.00373957	0.181864	Down	1.01967	0.0636604	9:64745051:64843960:1	Spats2l
ENSRNOT00000021534	796	344	1248	3.62791	1.85914	0.00286449	0.150131	Up	5.13052	17.8768	9:119181083:119190698:-1	Tgif1
ENSRNOT00000021550	1296	2292	300	0.13089	-2.93357	2.58517e-06	0.000483915	Down	29.1103	3.66297	17:16692557:16695126:-1	Id4
ENSRNOT00000021648	402.5	188	617	3.28191	1.71454	0.0130756	0.409162	Up	2.76126	8.7031	7:12401207:12405022:-1	Cirbp
ENSRNOT00000021694	730	352	1108	3.14773	1.65431	0.00821749	0.307644	Up	2.9423	8.89376	1:22614783:22625204:-1	Vnn1
ENSRNOT00000021704	185	24	346	14.4167	3.84967	3.14867e-05	0.00413748	Up	0.482107	6.57014	17:29567404:29568447:-1	Ppp1r3g
ENSRNOT00000021818	2925.5	1394	4457	3.19727	1.67684	0.00406221	0.191001	Up	9.10189	27.9465	2:9526209:9534362:1	Lysmd3
ENSRNOT00000021968	583.5	271	896	3.30627	1.72521	0.0076961	0.292994	Up	1.84593	5.86656	19:56032610:56037077:-1	Spata2L
ENSRNOT00000022055	31299.5	9838	52761	5.36298	2.42303	0.000524129	0.0435136	Up	47.1997	243.075	2:27480226:27500654:-1	Hmgcr
ENSRNOT00000022144	4692	579	8805	15.2073	3.92669	1.33396e-09	6.01553e-07	Up	2.65202	38.728	2:28049217:28061029:1	Enc1
ENSRNOT00000022190	517	130	904	6.95385	2.79781	4.84199e-05	0.00593054	Up	0.927209	6.20505	17:56109549:56129919:1	Map3k8
ENSRNOT00000022255	165.5	59	272	4.61017	2.20482	0.012066	0.391838	Up	0.518907	2.28141	5:72283313:72287669:-1	Klf4
ENSRNOT00000022309	9865.5	3623	16108	4.44604	2.15252	0.000621739	0.0495444	Up	37.4517	159.899	1:263246248:263269762:-1	Got1
ENSRNOT00000022478	2685.5	1531	3840	2.50816	1.32663	0.0216653	0.562674	Up	10.9265	26.3167	5:163136390:163167299:-1	Tnfrsf1b
ENSRNOT00000022519	79	3	155	51.6667	5.69116	6.9662e-05	0.00817889	Up	0.0591004	2.79492	18:64053472:64061472:-1	Fam210a
ENSRNOT00000022538	444	652	236	0.361963	-1.46609	0.0293641	0.675057	Down	9.3071	3.2407	1:152072665:152153449:1	Rab38
ENSRNOT00000022630	145.5	244	47	0.192623	-2.37615	0.00989163	0.345545	Down	10.7393	1.98911	17:43423111:43423580:1	Hist1h2ba
ENSRNOT00000022676	1083.5	550	1617	2.94	1.55582	0.00946025	0.335797	Up	5.72881	16.164	9:66495832:66519769:1	Nop58
ENSRNOT00000022734	294	65	523	8.04615	3.0083	0.000116246	0.0126734	Up	0.97735	7.58295	17:86408151:86409518:1	Otud1
ENSRNOT00000022757	569	329	809	2.45897	1.29805	0.0432181	0.826314	Up	3.34556	7.91506	19:41559487:41567013:-1	Zfp612
ENSRNOT00000022799	937	468	1406	3.00427	1.58702	0.00900494	0.327245	Up	6.98955	20.1634	5:166701465:166726794:-1	Slc25a33
ENSRNOT00000022818	32.5	3	62	20.6667	4.36923	0.0199294	0.531455	Up	0.0400876	0.737737	9:94721681:94724902:1	Neu2
ENSRNOT00000022914	4248	2174	6322	2.908	1.54003	0.00860103	0.319511	Up	32.6774	91.2629	3:150091630:150108898:-1	Pxmp4
ENSRNOT00000023014	145.5	38	253	6.65789	2.73507	0.00349877	0.173874	Up	0.747909	4.73652	9:49920854:49950093:-1	Fhl2
ENSRNOT00000023033	96	16	176	11	3.45943	0.00215957	0.121389	Up	0.116135	1.24409	17:67887939:67945037:-1	Klf6
ENSRNOT00000023068	960	98	1822	18.5918	4.2166	5.71849e-10	2.75063e-07	Up	1.58796	28.2309	9:80118029:80144789:1	Igfbp2
ENSRNOT00000023100	1230	1714	746	0.435239	-1.20012	0.041592	0.807503	Down	14.6076	6.10867	1:169446805:169463760:-1	LOC102554102
ENSRNOT00000023139	1000	567	1433	2.52734	1.33762	0.02578	0.621539	Up	6.84704	16.6276	1:211205903:211239888:1	Ppp2r2d
ENSRNOT00000023219	346.5	536	157	0.29291	-1.77147	0.0130944	0.409162	Down	7.83814	2.20886	1:214203861:214205782:1	Rassf7
ENSRNOT00000023287	37	4	70	17.5	4.12928	0.0178638	0.499232	Up	0.0653861	1.0016	5:166915330:166926636:-1	Spsb1
ENSRNOT00000023289	1871.5	2912	831	0.285371	-1.80909	0.00209956	0.119368	Down	39.6984	10.8837	5:153260930:153264669:1	Rsrp1
ENSRNOT00000023395	316.5	625	8	0.0128	-6.28771	2.51499e-11	1.60976e-08	Down	6.01173	0.0695183	17:89704102:89741321:-1	LOC100910779
ENSRNOT00000023457	43.5	0	87	Inf	Inf	0.000325424	0.029756	Up	7.81873e-11	2.9186	1:80415686:80416273:-1	Bloc1s3
ENSRNOT00000023477	8456.5	4574	12339	2.69764	1.4317	0.0185292	0.512057	Up	58.3835	151.251	1:211248098:211265282:-1	Bnip3
ENSRNOT00000023537	1728.5	488	2969	6.08402	2.60502	1.7839e-05	0.00258365	Up	3.9435	23.022	4:71740532:71749386:1	Zyx
ENSRNOT00000023582	18	1	35	35	5.12928	0.045026	0.84683	Up	0.00776337	0.417435	17:31441640:31444685:1	Tubb2b
ENSRNOT00000023592	775	1192	358	0.300336	-1.73535	0.00533823	0.232794	Down	28.4983	8.22458	9:93061900:93068130:1	LOC100362216
ENSRNOT00000023659	11644	17000	6288	0.369882	-1.43486	0.0212108	0.554792	Down	129.129	45.87	1:36320461:36354756:1	Srd5a1
ENSRNOT00000023945	5010	2965	7055	2.37943	1.25061	0.0327463	0.717165	Up	18.9763	43.3578	17:70010794:70020982:1	Net1
ENSRNOT00000023952	190.5	55	326	5.92727	2.56737	0.00271256	0.144297	Up	0.439681	2.50447	8:72405748:72460240:1	Car12
ENSRNOT00000024000	4142	2085	6199	2.97314	1.57199	0.00731913	0.282541	Up	19.5327	55.7595	1:238222521:238264330:1	Aldh1a1
ENSRNOT00000024030	576.5	319	834	2.61442	1.38649	0.0308541	0.69176	Up	6.2691	15.7551	8:50222896:50228369:-1	Tagln
ENSRNOT00000024149	297.5	459	136	0.296296	-1.75489	0.0174788	0.496159	Down	5.93178	1.68583	1:37878516:37886675:-1	AABR07001099.1
ENSRNOT00000024419	74	137	11	0.080292	-3.6386	0.00393851	0.187405	Down	1.24732	0.0938712	9:82208223:82214440:-1	Ihh
ENSRNOT00000024701	295.5	114	477	4.18421	2.06496	0.00575442	0.240977	Up	0.328273	1.31491	9:44033436:44126919:-1	Mgat4a
ENSRNOT00000024916	17	0	34	Inf	Inf	0.0212047	0.554792	Up	7.0733e-06	1.35075	17:54057964:54058460:1	LOC100362339
ENSRNOT00000024941	5052.5	7570	2535	0.334875	-1.57831	0.00756568	0.289624	Down	56.4207	18.1444	1:255371810:255376833:-1	Ppp1r3c
ENSRNOT00000024947	925	165	1685	10.2121	3.35221	2.87512e-07	7.31387e-05	Up	1.94417	19.0905	18:63130542:63140181:1	Tubb6
ENSRNOT00000024968	141.5	46	237	5.15217	2.36518	0.010904	0.36532	Up	1.72904	8.61447	18:63098144:63108051:1	Cidea
ENSRNOT00000025018	3307	4753	1861	0.391542	-1.35276	0.0195464	0.524108	Down	93.5837	35.1829	1:219345918:219347728:1	Cdk2ap2
ENSRNOT00000025045	29450.5	13779	45122	3.27469	1.71136	0.0115417	0.379784	Up	125.98	396.156	9:95295701:95302822:1	Ugt1a8
ENSRNOT00000025097	240	375	105	0.28	-1.8365	0.0186454	0.513835	Down	2.70833	0.727437	1:167906061:167911961:-1	Olr59
ENSRNOT00000025157	113.5	34	193	5.67647	2.50499	0.0129646	0.407032	Up	0.307227	1.66369	18:29329764:29340403:-1	Hbegf
ENSRNOT00000025158	42.5	85	0	0	#NAME?	0.000379376	0.0333079	Down	0.366092	0	3:60051546:60105242:-1	Gpr155
ENSRNOT00000025197	523.5	158	889	5.62658	2.49226	0.000236597	0.0226791	Up	1.36783	7.38415	5:135997725:136002900:-1	Plk3
ENSRNOT00000025221	499.5	215	784	3.64651	1.86652	0.00514163	0.22521	Up	0.825964	2.89538	1:265809754:265826306:1	Pprc1
ENSRNOT00000025294	2990	994	4986	5.0161	2.32657	9.69263e-05	0.0108046	Up	6.63978	31.9801	3:121725859:121739173:1	Slc20a1
ENSRNOT00000025319	1351.5	645	2058	3.1907	1.67387	0.00477934	0.213585	Up	5.94191	18.1978	1:214434626:214439720:1	Pnpla2
ENSRNOT00000025495	30.5	0	61	Inf	Inf	0.00247459	0.135637	Up	3.19246e-22	3.92245	18:29191731:29232978:1	Cystm1
ENSRNOT00000025711	233	466	0	0	#NAME?	3.70228e-13	3.67303e-10	Down	6.07035	5.62574e-05	9:100957696:100972741:1	D2hgdh
ENSRNOT00000025791	1338	800	1876	2.345	1.22959	0.0360526	0.753286	Up	4.57461	10.3042	1:265829108:265839818:1	Nolc1
ENSRNOT00000025800	53	1	105	105	6.71425	0.000312698	0.0287248	Up	0.0431069	3.16282	2:210761729:210766501:-1	Gstm3
ENSRNOT00000025826	894.5	485	1304	2.68866	1.42689	0.0188667	0.51635	Up	4.43921	11.4724	1:213997709:214002815:1	LOC100911615
ENSRNOT00000025846	211.5	101	322	3.18812	1.67271	0.0372354	0.764828	Up	1.18561	3.61703	1:100224401:100226725:1	Fv1
ENSRNOT00000025856	34.5	3	66	22	4.45943	0.015526	0.460489	Up	0.0534808	1.00172	1:252807065:252808380:-1	Ch25h
ENSRNOT00000025913	725.5	303	1148	3.78878	1.92173	0.0023561	0.1295	Up	3.32057	12.0775	1:80730499:80744831:-1	Bcl3
ENSRNOT00000025934	525.5	108	943	8.73148	3.12623	7.38044e-06	0.00119059	Up	0.679431	5.68848	18:55865467:55916220:-1	Synpo
ENSRNOT00000025988	2270	1310	3230	2.46565	1.30197	0.0242356	0.598113	Up	42.2627	100.102	1:194767474:194769524:-1	P8
ENSRNOT00000026076	323.5	158	489	3.09494	1.62991	0.0238921	0.595561	Up	1.26714	3.76637	19:11386024:11421498:1	Bbs2
ENSRNOT00000026235	426.5	225	628	2.79111	1.48084	0.0290401	0.669237	Up	1.51571	4.06008	1:266053002:266059256:1	Nfkb2
ENSRNOT00000026287	29	57	1	0.0175439	-5.83289	0.00935897	0.335042	Down	0.272442	0.0045934	17:1032240:1085885:-1	Ptch1
ENSRNOT00000026303	2453	242	4664	19.2727	4.26849	5.67028e-11	3.21456e-08	Up	1.59603	29.5555	18:27657628:27661429:1	Egr1
ENSRNOT00000026467	32	1	63	63	5.97728	0.00609039	0.252287	Up	0.0148152	0.68771	9:82436458:82444668:1	Dnajb2
ENSRNOT00000026470	3594	1377	5811	4.22004	2.07726	0.000462567	0.0394264	Up	16.9323	68.6448	16:20485029:20486707:-1	Jund
ENSRNOT00000026558	380.5	115	646	5.61739	2.4899	0.0005398	0.0444325	Up	1.22805	6.61686	9:97355924:97367445:1	Ackr3
ENSRNOT00000026597	2017.5	3166	869	0.274479	-1.86523	0.00151965	0.0936426	Down	39.0799	10.3029	16:20521956:20531396:1	Pgpep1
ENSRNOT00000026644	14	0	28	Inf	Inf	0.0361799	0.753286	Up	1.57229e-05	0.358087	1:166667304:166677026:-1	Art2b
ENSRNOT00000026652	249.5	52	447	8.59615	3.10369	0.00014497	0.0149042	Up	1.16792	9.71429	16:20555395:20557978:1	Gdf15
ENSRNOT00000026662	379	568	190	0.334507	-1.57989	0.0232924	0.585022	Down	3.24809	1.04291	10:88764732:88789057:1	Stat5a
ENSRNOT00000026760	6918.5	3501	10336	2.9523	1.56184	0.00939224	0.335181	Up	16.3282	46.2942	10:88790408:88842233:-1	Stat3
ENSRNOT00000026803	3462	2117	4807	2.27067	1.18312	0.0405125	0.795469	Up	12.9809	28.2975	16:8309239:8323293:1	Ncoa4
ENSRNOT00000026831	1217.5	1696	739	0.435731	-1.19849	0.0419913	0.811287	Down	16.5614	6.93253	9:17784468:17799005:1	Slc29a1
ENSRNOT00000026871	3798.5	50	7547	150.94	7.23783	1.72468e-21	8.55528e-18	Up	0.796281	115.133	7:11646269:11648322:-1	Gadd45b
ENSRNOT00000027022	21.5	0	43	Inf	Inf	0.0101092	0.347659	Up	0	0.589883	1:198284473:198288113:1	Doc2a
ENSRNOT00000027209	18.5	37	0	0	#NAME?	0.0163977	0.477071	Down	0.403234	4.95068e-06	19:38598165:38608779:1	Zfp90
ENSRNOT00000027237	72.5	6	139	23.1667	4.53398	0.000804042	0.0586537	Up	0.0127237	0.305338	4:56711049:56738791:1	Flnc
ENSRNOT00000027315	429.5	105	754	7.18095	2.84418	6.74728e-05	0.00796902	Up	0.642211	4.42904	15:34378148:34392066:-1	Tgm1
ENSRNOT00000027537	6087.5	2634	9541	3.62225	1.85689	0.00203292	0.117601	Up	46.3337	161.177	1:87009730:87016005:1	Ech1
ENSRNOT00000027590	62.5	16	109	6.8125	2.76818	0.0312177	0.695979	Up	0.10303	0.667692	1:167246109:167308827:-1	Nup98
ENSRNOT00000027611	49	88	10	0.113636	-3.1375	0.0304149	0.686567	Down	1.60504	0.171171	1:226077120:226084830:1	Rab3il1
ENSRNOT00000027755	3628	2030	5226	2.57438	1.36423	0.0188001	0.515949	Up	15.6619	38.7168	18:25984638:25997555:-1	Stard4
ENSRNOT00000027847	177	354	0	0	#NAME?	3.91634e-11	2.28553e-08	Down	2.46498	2.27715e-08	7:11301957:11314535:1	Tjp3
ENSRNOT00000027891	29	0	58	Inf	Inf	0.00313319	0.160129	Up	0	0.691822	1:220826560:220835066:1	Fosl1
ENSRNOT00000027973	885	439	1331	3.03189	1.60022	0.00885041	0.323407	Up	5.55639	16.1776	8:21905865:21909842:1	Ppan
ENSRNOT00000027998	26.5	2	51	25.5	4.67243	0.0258408	0.621799	Up	0.0621863	1.2992	1:87190381:87191588:-1	LOC103690068
ENSRNOT00000028070	381	548	214	0.390511	-1.35657	0.0497585	0.889467	Down	15.1789	5.70188	1:87224677:87232848:1	Ppp1r14a
ENSRNOT00000028131	42	79	5	0.0632911	-3.98185	0.0147985	0.446929	Down	0.615255	0.0335785	1:82550892:82580761:-1	Axl
ENSRNOT00000028178	160.5	75	246	3.28	1.7137	0.0490589	0.879833	Up	1.11466	3.5346	10:89578212:89580368:1	Arl4d
ENSRNOT00000028179	271	0	542	Inf	Inf	2.33957e-14	3.51222e-11	Up	0	20.708	10:89635675:89636193:1	Sap18
ENSRNOT00000028186	25.5	51	0	0	#NAME?	0.00542132	0.233847	Down	0.479042	0.00195766	10:16699072:16731898:-1	Crebrf
ENSRNOT00000028196	2760	1609	3911	2.4307	1.28137	0.0264142	0.627677	Up	22.5079	52.5472	1:83103925:83119193:1	Cyp2b2
ENSRNOT00000028299	34.5	68	1	0.0147059	-6.08746	0.00425331	0.198865	Down	0.70875	0.0112848	2:195651930:195673468:1	Tdrkh
ENSRNOT00000028379	315.5	149	482	3.2349	1.69372	0.0198348	0.530406	Up	2.25712	6.99953	1:221272353:221281180:-1	Cdc42ep2
ENSRNOT00000028405	644	377	911	2.41645	1.27289	0.043319	0.826314	Up	5.78193	13.4189	1:226996237:227002139:-1	Ccdc86
ENSRNOT00000028440	1422.5	2039	806	0.395292	-1.33901	0.0223683	0.575658	Down	8.26941	3.1397	2:195909626:195935878:-1	Cgn
ENSRNOT00000028468	500	246	754	3.06504	1.61591	0.0145907	0.442857	Up	4.36073	12.8179	1:84293102:84296367:1	Sertad1
ENSRNOT00000028490	74.5	6	143	23.8333	4.57491	0.000651816	0.0509365	Up	0.208207	4.51975	1:101595579:101596822:-1	Fgf21
ENSRNOT00000029266	48.5	87	10	0.114943	-3.12102	0.0318626	0.704565	Down	0.701793	0.081157	16:74752655:74779184:1	Ckap2
ENSRNOT00000029312	14	0	28	Inf	Inf	0.0361799	0.753286	Up	0.000476847	0.534484	2:262914327:263649764:1	Negr1
ENSRNOT00000029340	47	0	94	Inf	Inf	0.000191132	0.018682	Up	0.000136357	0.415553	2:177838210:177924970:-1	Rapgef2
ENSRNOT00000029660	309.5	72	547	7.59722	2.92547	0.000139662	0.0145852	Up	1.54198	11.3231	3:148215540:148216718:1	Id1
ENSRNOT00000029692	304	139	469	3.3741	1.7545	0.0169428	0.486512	Up	1.42266	4.61781	12:13043038:13067341:-1	Fam220a
ENSRNOT00000029819	755.5	404	1107	2.7401	1.45423	0.0189368	0.517555	Up	2.83641	7.45826	4:145594575:145651053:1	Irak2
ENSRNOT00000029845	1501	2106	896	0.425451	-1.23293	0.0345393	0.737743	Down	31.7216	12.9598	4:62380914:62391912:1	Tmem140
ENSRNOT00000030016	210.5	385	36	0.0935065	-3.41879	8.40572e-05	0.00953065	Down	3.27921	0.293386	5:139857363:139864393:-1	Zfp69
ENSRNOT00000030135	5252	7345	3159	0.430088	-1.21729	0.037968	0.771886	Down	60.9248	25.1638	13:98451637:98478327:-1	Adck3
ENSRNOT00000030221	271	0	542	Inf	Inf	2.33957e-14	3.51222e-11	Up	0.00789217	31.7251	8:81949877:81968589:1	LOC100360828
ENSRNOT00000030222	377.5	206	549	2.66505	1.41416	0.0415071	0.806645	Up	1.55982	3.9905	14:17247362:17274623:1	Sdad1
ENSRNOT00000030348	467.5	863	72	0.0834299	-3.58329	8.8196e-07	0.00018817	Down	4.88594	0.388844	20:28179140:28263037:-1	Edar
ENSRNOT00000030476	780	421	1139	2.70546	1.43588	0.0199544	0.531455	Up	5.50071	14.3003	13:47440803:47443188:1	Yod1
ENSRNOT00000030540	1297	413	2181	5.28087	2.40078	8.30678e-05	0.00947259	Up	3.6447	18.4788	1:184299250:184407480:1	Insc
ENSRNOT00000030613	35	67	3	0.0447761	-4.48113	0.0145849	0.442857	Down	1.87147	0.0710533	18:69841053:69849389:1	Mro
ENSRNOT00000032236	1203	230	2176	9.46087	3.24197	3.41909e-07	8.48021e-05	Up	1.9285	17.5263	13:71179910:71185216:1	Rgs16
ENSRNOT00000032249	110.5	6	215	35.8333	5.16323	1.7367e-05	0.00255257	Up	0.113076	3.94147	12:38160464:38161546:1	Hcar2
ENSRNOT00000032316	1155.5	281	2030	7.2242	2.85284	5.24002e-06	0.000912039	Up	9.29452	64.4273	18:29490981:29492718:1	Ankhd1
ENSRNOT00000032704	592	863	321	0.371958	-1.42679	0.0258534	0.621799	Down	5.23597	1.86949	15:19965187:20032191:-1	Ddhd1
ENSRNOT00000032772	414	602	226	0.375415	-1.41344	0.0379456	0.771886	Down	6.53124	2.35511	4:57796338:57823283:-1	Tmem209
ENSRNOT00000032786	626	904	348	0.384956	-1.37724	0.0298733	0.681317	Down	4.9147	1.81845	7:69213147:69263142:1	Lrig3
ENSRNOT00000032918	1762.5	399	3126	7.83459	2.96986	1.44794e-06	0.000296187	Up	1.26793	9.5355	16:83824430:83848684:1	Irs2
ENSRNOT00000032974	2554.5	1357	3752	2.76492	1.46724	0.0113916	0.376092	Up	12.1522	32.2668	2:2456735:2524237:1	Ell2
ENSRNOT00000032991	17.5	35	0	0	#NAME?	0.0194418	0.522008	Down	2.81642	1.25575e-15	1:84612448:84615181:1	AABR07071891.1
ENSRNOT00000033119	1890	704	3076	4.36932	2.12741	0.000345268	0.0308595	Up	4.29081	18.0096	20:7976713:8019020:-1	Fkbp5
ENSRNOT00000033254	164.5	262	67	0.255725	-1.96733	0.0240381	0.598113	Down	0.890053	0.217561	18:49829650:49937522:-1	Zfp608
ENSRNOT00000033677	2815.5	1580	4051	2.56392	1.35835	0.0188357	0.516213	Up	16.8038	41.3695	16:7097507:7103604:-1	Gnl3
ENSRNOT00000033695	206.5	52	361	6.94231	2.79542	0.000952907	0.0671988	Up	0.811031	5.44369	10:11338306:11343070:1	Ubald1
ENSRNOT00000033916	27	0	54	Inf	Inf	0.00428842	0.19946	Up	2.93671e-09	0.506602	16:24582002:24612698:-1	Naf1
ENSRNOT00000033934	1022.5	627	1418	2.26156	1.17732	0.0484409	0.874323	Up	3.9176	8.51221	3:8802852:8828533:1	Lrrc8a
ENSRNOT00000033975	2084.5	2940	1229	0.418027	-1.25833	0.0294377	0.675264	Down	3.46145	1.39	7:121930638:122147934:1	Tnrc6b
ENSRNOT00000034146	679	1007	351	0.34856	-1.52052	0.0156998	0.464795	Down	7.07459	2.36886	3:123776255:123790567:1	Mavs
ENSRNOT00000034266	217.5	73	362	4.9589	2.31002	0.00463696	0.20913	Up	0.740991	3.52358	1:80267725:80271001:-1	Cd3eap
ENSRNOT00000034545	370.5	540	201	0.372222	-1.42576	0.0406993	0.79639	Down	4.79081	1.70703	7:13318533:13337858:1	LOC691170
ENSRNOT00000034723	877	496	1258	2.53629	1.34272	0.0271057	0.638755	Up	8.13228	19.8004	15:106629312:106678918:-1	Stk24
ENSRNOT00000035158	4098	734	7462	10.1662	3.34571	9.59348e-08	2.79932e-05	Up	6.02967	58.8686	3:44806106:44846464:1	Upp2
ENSRNOT00000035320	2277	1121	3433	3.06244	1.61468	0.00558126	0.238139	Up	6.74702	19.8462	6:23433532:23473169:-1	Wdr43
ENSRNOT00000035409	24.5	49	0	0	#NAME?	0.00633419	0.258076	Down	0.241823	0	5:133865331:133878604:1	Tal1
ENSRNOT00000035448	68.5	1	136	136	7.08746	3.90128e-05	0.00493052	Up	0.00558219	0.660608	17:21634551:21677477:-1	Gcnt2
ENSRNOT00000036137	1589.5	834	2345	2.81175	1.49147	0.0108859	0.36532	Up	4.08322	11.0222	12:39731121:39769480:-1	Pptc7
ENSRNOT00000036195	355	158	552	3.49367	1.80474	0.0111437	0.370997	Up	2.10705	7.08457	17:21580087:21591203:-1	Pak1ip1
ENSRNOT00000036435	605.5	1055	156	0.147867	-2.75763	3.86456e-05	0.00491543	Down	11.0015	1.55973	3:114355814:114378941:1	LOC691960
ENSRNOT00000036814	51	100	2	0.02	-5.64386	0.00101141	0.0701692	Down	0.322642	0.00701125	10:72300173:72417070:-1	Usp32
ENSRNOT00000036993	4427	2696	6158	2.28412	1.19164	0.0405712	0.795469	Up	30.0282	65.8791	2:243656579:243687857:1	Adh6
ENSRNOT00000037094	25	50	0	0	#NAME?	0.00586044	0.24378	Down	0.186354	0.000201623	9:49852560:49902943:-1	Tgfbrap1
ENSRNOT00000037120	17.5	1	34	34	5.08746	0.0486029	0.874323	Up	0.0123844	0.726567	8:104966124:104995725:-1	Slc25a36
ENSRNOT00000037154	29.5	4	55	13.75	3.78136	0.0431789	0.826314	Up	0.0217955	0.309781	2:238109758:238253287:-1	Gstcd
ENSRNOT00000037296	35	0	70	Inf	Inf	0.00121902	0.0798278	Up	0.000229068	1.94393	12:31335425:31355445:1	Stx2
ENSRNOT00000037363	804	127	1481	11.6614	3.54367	1.21271e-07	3.34202e-05	Up	1.66692	18.6329	8:116311078:116318289:1	Rassf1
ENSRNOT00000037844	6193.5	1894	10493	5.54013	2.46992	6.04919e-05	0.00727442	Up	14.2024	75.5652	7:41475163:41479392:1	Dusp6
ENSRNOT00000038176	191	305	77	0.252459	-1.98588	0.017398	0.495994	Down	0.63783	0.155536	1:207993895:208020454:-1	Mki67
ENSRNOT00000038207	176.5	268	85	0.317164	-1.6567	0.0498597	0.889673	Down	0.751483	0.228809	11:57207656:57260001:1	Plcxd2
ENSRNOT00000038212	317	41	593	14.4634	3.85434	1.56324e-06	0.000310178	Up	2.41129	33.808	19:11302125:11302938:-1	AC128848.1
ENSRNOT00000038293	68	120	16	0.133333	-2.90689	0.0201424	0.534313	Down	1.24817	0.159866	12:44967258:44999159:-1	Vsig10
ENSRNOT00000038376	414	685	143	0.208759	-2.26009	0.0012586	0.0818794	Down	5.54397	1.11067	10:70227163:70241254:-1	Rad51d
ENSRNOT00000038480	11255	4772	17738	3.7171	1.89418	0.00262537	0.141942	Up	57.1676	204.066	7:143596511:143603803:-1	Krt8
ENSRNOT00000038537	169	80	258	3.225	1.6893	0.048588	0.874323	Up	0.295562	0.91053	20:30339673:30406295:-1	Unc5b
ENSRNOT00000038610	240.5	75	406	5.41333	2.43652	0.00228678	0.126418	Up	1.13703	5.91788	9:42831742:42839837:-1	Neurl3
ENSRNOT00000038879	12.5	25	0	0	#NAME?	0.0477266	0.870396	Down	0.236121	1.67188e-06	19:24747178:24750919:1	Dnajb1
ENSRNOT00000039002	18346	4456	32236	7.23429	2.85485	2.48909e-05	0.00338954	Up	19.8579	137.941	7:138088649:138100841:-1	Slc38a2
ENSRNOT00000039221	47.5	1	94	94	6.55459	0.000670162	0.0514026	Up	0.0132054	0.893675	13:79378733:79388498:1	Tnfsf18
ENSRNOT00000039275	6576	2809	10343	3.68209	1.88053	0.0018861	0.111381	Up	32.7231	115.695	12:45905371:45920013:1	Hspb8
ENSRNOT00000039308	639	931	347	0.372718	-1.42385	0.0245016	0.601683	Down	3.72016	1.33152	2:113696154:113849403:1	Pld1
ENSRNOT00000039335	2195	3095	1295	0.418417	-1.25699	0.0294803	0.675459	Down	15.351	6.16881	10:43613931:43653390:1	Igtp
ENSRNOT00000039353	24	46	2	0.0434783	-4.52356	0.035784	0.753286	Down	0.444949	0.0224042	4:129479766:129515435:-1	Eogt
ENSRNOT00000039398	78.5	144	13	0.0902778	-3.46949	0.00445436	0.203648	Down	1.81821	0.158324	10:17048251:17075139:-1	Neurl1b
ENSRNOT00000039855	13.5	27	0	0	#NAME?	0.0396317	0.782461	Down	0.764586	1.29383e-06	4:156050054:156067424:1	Clec4a
ENSRNOT00000040056	1820.5	891	2750	3.08642	1.62593	0.00547048	0.235456	Up	5.80594	17.2119	8:116054465:116060723:1	Cish
ENSRNOT00000040060	103.5	17	190	11.1765	3.48239	0.0015169	0.0936426	Up	0.209504	2.26222	1:80517411:80544825:-1	Relb
ENSRNOT00000040069	124.5	199	50	0.251256	-1.99277	0.0369655	0.762574	Down	1.56743	0.37924	12:24978483:25020907:1	Eln
ENSRNOT00000040132	86	156	16	0.102564	-3.2854	0.00477646	0.213585	Down	1.6605	0.166693	10:1622573:1674701:1	AABR07028989.1
ENSRNOT00000040391	66	118	14	0.118644	-3.07529	0.0161034	0.471272	Down	0.273845	0.0311102	4:65834035:65962539:-1	RGD1306271
ENSRNOT00000040461	14095.5	2689	25502	9.48382	3.24547	1.51948e-06	0.000307648	Up	34.2631	312.023	9:61655963:61675873:1	Coq10b
ENSRNOT00000040481	81.5	1	162	162	7.33985	7.33711e-06	0.00119059	Up	0.0464275	8.95023	5:161889342:161889701:1	LOC100359951
ENSRNOT00000040847	352.5	101	604	5.9802	2.58019	0.000440683	0.0380126	Up	0.719264	4.14766	2:56110777:56151531:-1	Osmr
ENSRNOT00000041116	2398.5	438	4359	9.95205	3.31499	9.96102e-08	2.86444e-05	Up	3.02602	28.9162	11:47243342:47271487:1	Nfkbiz
ENSRNOT00000041177	641	359	923	2.57103	1.36235	0.0310494	0.693991	Up	1.43689	3.54542	11:38442742:38457373:-1	Zfp295
ENSRNOT00000041237	3802.5	2140	5465	2.55374	1.35261	0.0199493	0.531455	Up	24.1969	59.3238	18:40586315:40597671:1	Eif1a
ENSRNOT00000041373	34.5	69	0	0	#NAME?	0.00131863	0.0832481	Down	0.383973	2.77417e-07	6:73358112:73365933:1	Arhgap5
ENSRNOT00000041374	2854	787	4921	6.25286	2.64452	1.20275e-05	0.00179435	Up	14.1859	85.1673	5:98469047:98515125:1	Lurap1l
ENSRNOT00000041508	33	63	3	0.047619	-4.39232	0.0187249	0.514598	Down	1.16515	0.0496678	X:88298266:88309290:1	AABR07039936.1
ENSRNOT00000041726	17.5	0	35	Inf	Inf	0.0194418	0.522008	Up	0.000226373	0.133648	17:12614311:12669573:-1	Syk
ENSRNOT00000041859	67	0	134	Inf	Inf	1.04426e-05	0.0015817	Up	0.000232007	0.738982	8:99977334:100059736:1	Plod2
ENSRNOT00000042903	1527.5	2207	848	0.384232	-1.37995	0.0183198	0.507284	Down	7.98093	2.94438	8:21511839:21519013:-1	Zfp266
ENSRNOT00000042973	559	841	277	0.32937	-1.60222	0.0135906	0.418735	Down	4.57699	1.44448	6:135890931:135903647:1	Tnfaip2
ENSRNOT00000043148	19	0	38	Inf	Inf	0.0150895	0.449558	Up	0.00682708	0.557175	10:71363688:71382058:-1	Dusp14
ENSRNOT00000043172	13826.5	21341	6312	0.295769	-1.75746	0.00575664	0.240977	Down	102.573	29.1343	10:88392248:88442845:-1	Acly
ENSRNOT00000043343	121	211	31	0.146919	-2.7669	0.00557161	0.238139	Down	1.6036	0.225112	10:37270461:37311625:-1	Jade2
ENSRNOT00000043374	519.5	276	763	2.76449	1.46701	0.0249996	0.610137	Up	2.02408	5.3648	4:175970451:176026133:-1	Slco1a4
ENSRNOT00000043448	32	5	59	11.8	3.56071	0.0455371	0.854822	Up	0.0173855	0.189364	10:64980386:65066612:-1	Myo18a
ENSRNOT00000043461	2172.5	1080	3265	3.02315	1.59605	0.00615566	0.25446	Up	13.1074	38.0463	7:129860327:129863441:1	Pim3
ENSRNOT00000043476	100.5	180	21	0.116667	-3.09954	0.00431669	0.199655	Down	0.412	0.0468927	4:145703046:145948996:-1	Atp2b2
ENSRNOT00000043517	67.5	1	134	134	7.06609	4.44895e-05	0.00551726	Up	0.0415091	6.33883	1:248402980:248403399:1	LOC100361898
ENSRNOT00000043533	3889	5937	1841	0.310089	-1.68924	0.00400415	0.189619	Down	67.9676	20.2379	3:28416954:28566928:1	Kynu
ENSRNOT00000043736	3262	4943	1581	0.319846	-1.64455	0.00485115	0.215419	Down	37.6412	11.5655	18:55505993:55508704:1	RGD1309362
ENSRNOT00000043822	3797	2372	5222	2.20152	1.1385	0.048985	0.879833	Up	12.5248	26.4745	4:22134805:22192474:-1	Abcb4
ENSRNOT00000043870	22.5	0	45	Inf	Inf	0.00864717	0.319511	Up	3.98186e-14	0.304271	6:4258991:4520604:-1	Slc8a1
ENSRNOT00000043917	194	90	298	3.31111	1.72732	0.0360357	0.753286	Up	2.28736	7.28629	11:60804311:60819249:-1	Cd200r1l
ENSRNOT00000043937	1205.5	740	1671	2.25811	1.17511	0.0461802	0.86187	Up	5.63841	12.2191	2:199716713:199771896:-1	Chd1l
ENSRNOT00000044163	182.5	83	282	3.39759	1.76451	0.0355561	0.751727	Up	0.512049	1.67563	9:17340341:17355681:1	Vegfa
ENSRNOT00000044486	2070	1151	2989	2.59687	1.37678	0.0175319	0.496954	Up	9.61497	23.97	1:239266921:239301176:1	Abhd17b
ENSRNOT00000044562	285.5	465	106	0.227957	-2.13317	0.00477087	0.213585	Down	2.34262	0.512814	15:48789165:48803147:1	Zfp395
ENSRNOT00000044565	239.5	12	467	38.9167	5.28232	2.16604e-08	7.54011e-06	Up	0.130736	4.72628	1:215030429:215033460:-1	Dusp8
ENSRNOT00000044593	15	0	30	Inf	Inf	0.030231	0.683972	Up	0.000508511	0.363778	10:4356915:4390030:1	Rsl1d1
ENSRNOT00000044690	242.5	399	86	0.215539	-2.21398	0.00505211	0.221778	Down	3.51643	0.726144	1:33910912:33916741:1	Irx1
ENSRNOT00000044788	1442.5	222	2663	11.9955	3.58442	2.08979e-08	7.40457e-06	Up	2.26461	26.0533	1:101511901:101514974:-1	Ppp1r15a
ENSRNOT00000044893	224.5	447	2	0.00447427	-7.80413	2.89115e-11	1.73837e-08	Down	5.41329	0.0179332	7:117653850:117661613:1	Adck5
ENSRNOT00000045400	216.5	26	407	15.6538	3.96845	8.33529e-06	0.00132311	Up	0.0339475	0.501553	5:141040752:141229781:-1	Macf1
ENSRNOT00000045488	1229	2040	418	0.204902	-2.28699	0.000174393	0.0173015	Down	8.202	1.61287	8:22791995:22821397:-1	Kank2
ENSRNOT00000045553	737.5	420	1055	2.5119	1.32878	0.0319579	0.704565	Up	1.85333	4.46937	7:132071116:132143470:-1	Kif21a
ENSRNOT00000045571	15284	4694	25874	5.51214	2.46261	0.000178956	0.0175784	Up	63.734	337.384	5:134469270:134484839:-1	Cyp4a2
ENSRNOT00000045656	35.5	69	2	0.0289855	-5.10852	0.00783995	0.296724	Down	0.846633	0.0221666	1:282678166:282685528:1	Ces2
ENSRNOT00000045902	210.5	51	370	7.2549	2.85896	0.000707673	0.053188	Up	0.518809	3.62931	10:97735567:97756521:-1	Slc16a6
ENSRNOT00000045964	1185.5	1814	557	0.307056	-1.70343	0.00441731	0.202421	Down	10.055	2.96481	7:70697050:70805221:1	R3hdm2
ENSRNOT00000046025	1450	534	2366	4.43071	2.14754	0.000349737	0.0311187	Up	4.5444	19.3526	1:189241593:189267908:1	Acsm5
ENSRNOT00000046313	325	547	103	0.1883	-2.4089	0.0011655	0.077344	Down	3.80164	0.685386	1:178039063:178137465:1	Arntl
ENSRNOT00000046539	173	67	279	4.16418	2.05803	0.016929	0.486512	Up	0.970251	3.89152	1:7816838:8038665:-1	Aig1
ENSRNOT00000047314	232	60	404	6.73333	2.75132	0.000770235	0.0572397	Up	1.19546	7.70309	16:54358471:54383643:1	Mtus1
ENSRNOT00000047324	210	82	338	4.12195	2.04333	0.0121681	0.391915	Up	1.1444	4.53851	6:127647184:127653124:-1	Serpina11
ENSRNOT00000047466	35.5	65	6	0.0923077	-3.43741	0.0420759	0.812131	Down	0.362641	0.030858	12:46797959:46845079:-1	Pxn
ENSRNOT00000047634	1283	436	2130	4.88532	2.28845	0.000166281	0.0165796	Up	2.8223	13.229	12:17252093:17263477:1	Zfand2a
ENSRNOT00000047663	26.5	0	53	Inf	Inf	0.00463749	0.20913	Up	1.14013e-18	2.79881	20:3677474:3677847:1	Mt1m
ENSRNOT00000047831	1271	2011	531	0.264048	-1.92113	0.00136637	0.0855256	Down	12.2574	3.10599	1:171820423:171966179:1	Ppfibp2
ENSRNOT00000047840	54	0	108	Inf	Inf	6.73755e-05	0.00796902	Up	0.000463073	1.25613	14:11256268:11274578:1	Hnrnpd
ENSRNOT00000047907	15	30	0	0	#NAME?	0.030231	0.683972	Down	0.528954	5.01255e-05	11:58803140:59110562:-1	Lsamp
ENSRNOT00000048027	115.5	191	40	0.209424	-2.2555	0.0228353	0.581674	Down	0.905063	0.180965	9:65177511:65265149:1	Aox2
ENSRNOT00000048383	68	115	21	0.182609	-2.45317	0.0448663	0.84543	Down	4.46563	0.790401	5:52653327:52767592:-1	LOC298111
ENSRNOT00000048446	373	208	538	2.58654	1.37102	0.0484303	0.874323	Up	0.951652	2.35845	7:117062748:117070936:-1	Fam83h
ENSRNOT00000048490	20182.5	11530	28835	2.50087	1.32243	0.0411606	0.801481	Up	100.054	240.294	10:94980928:94988461:-1	Ddx5
ENSRNOT00000048509	825	1465	185	0.12628	-2.9853	4.35479e-06	0.000771498	Down	7.08913	0.860452	14:60256712:60276794:-1	Slc34a2
ENSRNOT00000048529	3342.5	2015	4670	2.31762	1.21264	0.0357568	0.753286	Up	19.4834	43.3635	4:157864969:157877633:1	Tnfrsf1a
ENSRNOT00000048533	56.5	102	11	0.107843	-3.21299	0.0192221	0.522008	Down	1.71828	0.173685	11:57486365:57498894:1	Abhd10
ENSRNOT00000048543	2309	3215	1403	0.436392	-1.1963	0.0378993	0.771886	Down	16.5192	6.92585	10:64865805:64915148:-1	Sez6
ENSRNOT00000048851	72	137	7	0.0510949	-4.29068	0.00128809	0.0832481	Down	1.88894	0.0873576	12:39864302:39882030:-1	Ppp1cc
ENSRNOT00000048858	61	121	1	0.00826446	-6.91886	0.000105512	0.011631	Down	2.27768	0.0116235	20:154658:157665:-1	RT1-CE10
ENSRNOT00000049292	2710	1413	4007	2.83581	1.50376	0.00957724	0.337534	Up	3.26662	8.89897	11:69484293:70025633:1	Kalrn
ENSRNOT00000049311	296.5	136	457	3.36029	1.74859	0.0179537	0.500334	Up	1.83296	5.89281	10:59867781:59888198:-1	Aspa
ENSRNOT00000049481	39.5	3	76	25.3333	4.66297	0.0083004	0.310163	Up	0.0326997	0.774397	6:107279920:107325345:-1	Numb
ENSRNOT00000050005	1691.5	626	2757	4.40415	2.13886	0.000337602	0.0303219	Up	3.55409	15.037	14:83573931:83603003:-1	Limk2
ENSRNOT00000050191	2317	1006	3628	3.60636	1.85054	0.001612	0.0972196	Up	5.72966	19.8314	9:98190829:98257735:1	Lrrfip1
ENSRNOT00000050223	16837.5	9844	23831	2.42087	1.27552	0.0454428	0.853859	Up	122.847	285.591	10:104573664:104575890:-1	H3f3a
ENSRNOT00000050543	58.5	1	116	116	6.85798	0.000147748	0.0151114	Up	0.0097806	0.800457	8:128659884:128665988:-1	Csrnp1
ENSRNOT00000050819	34	2	66	33	5.04439	0.00957614	0.337534	Up	0.00860264	0.307071	X:23481380:23530003:-1	Shroom2
ENSRNOT00000050825	14.5	29	0	0	#NAME?	0.0330694	0.717902	Down	1.64753	0	3:17546566:17547291:1	AABR07051583.1
ENSRNOT00000050914	12.5	25	0	0	#NAME?	0.0477266	0.870396	Down	0.154689	0.000740236	2:196334626:196343987:1	Sema6c
ENSRNOT00000050931	45.5	91	0	0	#NAME?	0.000239879	0.0228831	Down	4.94361	1.20437e-07	1:91588228:91588609:-1	Snrpg
ENSRNOT00000051067	264	76	452	5.94737	2.57225	0.00104746	0.0712817	Up	0.359137	2.04035	17:70684340:70713726:1	Pfkfb3
ENSRNOT00000051244	66796	20141	113451	5.63284	2.49386	0.00131341	0.0832481	Up	205.422	1111.17	12:11703598:11733099:-1	Cyp3a23/3a1
ENSRNOT00000051349	3267.5	1218	5317	4.36535	2.1261	0.000337725	0.0303219	Up	4.76339	19.9734	17:82065937:82091362:1	Arl5b
ENSRNOT00000051449	81.5	1	162	162	7.33985	7.33711e-06	0.00119059	Up	0.0464275	8.95023	9:1012091:1012450:-1	LOC100362149
ENSRNOT00000051496	1104.5	432	1777	4.11343	2.04034	0.000793293	0.0580831	Up	2.15769	8.51827	1:15412603:15613746:1	Map3k5
ENSRNOT00000051720	12176	20339	4013	0.197306	-2.3415	0.000272665	0.0257629	Down	96.9441	18.3671	16:60415229:60427474:-1	Ppp1r3b
ENSRNOT00000052312	14	28	0	0	#NAME?	0.0361799	0.753286	Down	0.248537	5.04298e-06	3:111422267:111452600:1	Nusap1
ENSRNOT00000052369	55006	22817	87195	3.82149	1.93414	0.00876064	0.321905	Up	175.706	644.805	14:22417206:22438435:1	Ugt2b37
ENSRNOT00000054869	1073.5	602	1545	2.56645	1.35977	0.0227029	0.579758	Up	5.53686	13.6473	1:213973489:213981330:-1	LOC100911440
ENSRNOT00000054976	62	0	124	Inf	Inf	2.11651e-05	0.00299777	Up	0.00404669	2.17486	10:109519134:109520846:-1	Actg1
ENSRNOT00000055386	22	0	44	Inf	Inf	0.00934839	0.335042	Up	1.78921e-05	0.185994	5:171472273:171620380:1	LOC100911486
ENSRNOT00000055473	20	39	1	0.025641	-5.2854	0.0334894	0.723852	Down	0.470014	0.00600369	4:181103774:181158200:1	Arntl2
ENSRNOT00000055607	963	563	1363	2.42096	1.27558	0.0338217	0.727074	Up	9.41965	21.9117	2:232147690:232178671:-1	Ap1ar
ENSRNOT00000055735	1690.5	2358	1023	0.433842	-1.20476	0.0378631	0.771886	Down	6.43625	2.68177	2:219788234:219842986:-1	Agl
ENSRNOT00000055805	59.5	103	16	0.15534	-2.6865	0.0396075	0.782461	Down	2.2026	0.324001	7:130347945:130350570:-1	Odf3b
ENSRNOT00000055839	23	45	1	0.0222222	-5.49185	0.0218813	0.567542	Down	0.147742	0.00378266	5:159540453:159583049:-1	Crocc
ENSRNOT00000056077	102.5	165	40	0.242424	-2.04439	0.0462494	0.86187	Down	9.17209	2.14646	7:123088187:123088819:-1	AC096601.1
ENSRNOT00000056100	358	667	49	0.0734633	-3.76683	1.24476e-06	0.000259984	Down	7.03432	0.499305	8:119260618:119265157:-1	Rtp3
ENSRNOT00000056198	36.5	73	0	0	#NAME?	0.000963472	0.0673141	Down	0.649047	1.85412e-05	4:152892388:152925928:1	Kdm5a
ENSRNOT00000056251	24	0	48	Inf	Inf	0.00684588	0.27212	Up	1.28941e-05	0.652793	9:121831716:121877795:1	Yes1
ENSRNOT00000056675	1132	689	1575	2.28592	1.19278	0.043961	0.833914	Up	7.14867	15.6799	12:52467450:52474511:1	Pgam5
ENSRNOT00000056923	169	70	268	3.82857	1.93681	0.0249519	0.609724	Up	0.773598	2.84189	2:187415262:187424045:1	Gpatch4
ENSRNOT00000057673	388.5	173	604	3.49133	1.80378	0.0097418	0.341514	Up	0.93318	3.1295	14:83573928:83603047:-1	Limk2
ENSRNOT00000057855	90	31	149	4.80645	2.26497	0.0371093	0.763821	Up	0.544941	2.47426	17:78915604:78919143:1	Rpp38
ENSRNOT00000057898	37017	4515	69519	15.3973	3.94461	2.11052e-07	5.51012e-05	Up	239.738	3544.49	17:78793336:78793724:1	Mt1
ENSRNOT00000058111	216	353	79	0.223796	-2.15974	0.00785102	0.296724	Down	2.55116	0.548121	14:81435449:81472952:-1	Sh3bp2
ENSRNOT00000058148	78	18	138	7.66667	2.9386	0.013254	0.413078	Up	0.0545848	0.393288	15:60722160:60752106:-1	Akap11
ENSRNOT00000058162	375	578	172	0.297578	-1.74866	0.0126902	0.403523	Down	2.59645	0.744237	19:33928356:33991703:1	Ednra
ENSRNOT00000058367	1121.5	1567	676	0.431398	-1.21291	0.0407386	0.79639	Down	25.9745	10.761	17:69441223:69460321:-1	Akr1c1
ENSRNOT00000058495	593.5	287	900	3.13589	1.64887	0.0104698	0.357846	Up	2.38425	7.17521	2:124400679:124405329:1	Spry1
ENSRNOT00000058589	19	37	1	0.027027	-5.20945	0.038757	0.779786	Down	0.585097	0.0196556	7:54021832:54026789:1	Osbpl8
ENSRNOT00000058667	13.5	27	0	0	#NAME?	0.0396317	0.782461	Down	0.375072	0.00130628	9:65331290:65348926:1	Nif3l1
ENSRNOT00000058834	29	4	54	13.5	3.75489	0.0457671	0.858177	Up	0.0200202	0.235185	X:36930186:37003642:-1	Adgrg2
ENSRNOT00000058837	847.5	1374	321	0.233624	-2.09774	0.000779395	0.0574898	Down	9.50709	2.13092	17:62999666:63002650:1	LOC100909849
ENSRNOT00000058885	13	26	0	0	#NAME?	0.0434723	0.826314	Down	0.172663	0.00170227	11:72164566:72378895:-1	Dlg1
ENSRNOT00000059159	16.5	0	33	Inf	Inf	0.0231482	0.582878	Up	0	2.0065	9:53440272:53440595:1	LOC685203
ENSRNOT00000059183	473.5	720	227	0.315278	-1.6653	0.012799	0.404515	Down	4.00767	1.213	5:78483893:78567279:1	Rgs3
ENSRNOT00000059431	514.5	772	257	0.332902	-1.58683	0.0158536	0.466026	Down	2.24354	0.718808	X:23478871:23649466:-1	Shroom2
ENSRNOT00000059458	2461.5	1078	3845	3.56679	1.83463	0.00175122	0.104347	Up	11.0832	37.9812	5:76812931:76848101:1	Hsdl2
ENSRNOT00000059565	275.5	115	436	3.7913	1.92269	0.0110265	0.36771	Up	1.32835	4.83286	2:84361061:84436912:-1	Ankrd33b
ENSRNOT00000059571	25	48	2	0.0416667	-4.58496	0.0314276	0.699087	Down	0.231167	0.00906055	9:45901741:46081880:1	Npas2
ENSRNOT00000059592	17.5	35	0	0	#NAME?	0.0194418	0.522008	Down	0.440993	0.00103719	12:21748633:21760292:-1	LOC102550456
ENSRNOT00000059673	833	437	1229	2.81236	1.49178	0.0150036	0.449558	Up	2.99863	8.10045	16:31734944:31946242:1	Palld
ENSRNOT00000059892	1214	1870	558	0.298396	-1.7447	0.00354156	0.174805	Down	18.6544	5.34176	4:62797677:62840357:-1	Slc13a4
ENSRNOT00000060143	2668	1672	3664	2.19139	1.13184	0.0490866	0.879833	Up	19.3212	40.6617	17:30965942:30994410:1	Pxdc1
ENSRNOT00000060515	471.5	878	65	0.0740319	-3.75571	3.16238e-07	7.94278e-05	Down	10.6029	0.752008	14:88543630:88574195:1	LOC100911576
ENSRNOT00000060530	15874.5	8941	22808	2.55095	1.35103	0.0336111	0.724128	Up	66.3999	162.661	4:50152452:50200328:-1	Aass
ENSRNOT00000060698	797	348	1246	3.58046	1.84014	0.00313931	0.160129	Up	2.14917	7.38573	7:12414733:12424367:-1	Midn
ENSRNOT00000060847	258	112	404	3.60714	1.85086	0.0157898	0.465528	Up	0.961838	3.32246	15:23777856:23878539:1	Samd4a
ENSRNOT00000061054	572.5	933	212	0.227224	-2.13781	0.00117186	0.0775065	Down	9.39627	2.05012	18:24708115:24746159:1	Lims2
ENSRNOT00000061070	3198	1894	4502	2.37698	1.24913	0.0305667	0.688428	Up	15.4822	35.349	13:47785161:47831110:-1	Mapkapk2
ENSRNOT00000061157	204.5	96	313	3.26042	1.70506	0.0355746	0.751727	Up	0.789431	2.4616	1:24185456:24191908:-1	Sgk1
ENSRNOT00000061333	120	197	43	0.218274	-2.19579	0.0243556	0.599584	Down	1.39192	0.290324	5:25253010:25255938:1	Rbm12b
ENSRNOT00000061430	2154	554	3754	6.77617	2.76047	5.59569e-06	0.000948972	Up	2.78856	18.1427	9:16737642:16747225:1	Srf
ENSRNOT00000061619	1843	1138	2548	2.23902	1.16286	0.0442962	0.837071	Up	16.0493	34.4929	13:34267471:34277274:1	Nifk
ENSRNOT00000061786	24.5	49	0	0	#NAME?	0.00633419	0.258076	Down	1.31685	0.00079891	6:108745895:108756130:1	Eif3h
ENSRNOT00000061871	58	0	116	Inf	Inf	3.75984e-05	0.00481308	Up	3.72287e-06	1.10389	6:7961523:7978008:1	Abcg8
ENSRNOT00000063787	256	89	423	4.75281	2.24878	0.00393617	0.187405	Up	2.6868	12.3311	8:129241109:129243402:1	Rpl14
ENSRNOT00000063853	10778.5	8	21549	2693.62	11.3953	1.97564e-31	1.96003e-27	Up	0.0763473	191.059	9:95285592:95302822:1	Ugt1a8
ENSRNOT00000063864	28.5	0	57	Inf	Inf	0.0033893	0.170254	Up	0.000207315	0.437543	11:46208075:46369577:-1	Abi3bp
ENSRNOT00000063865	353.5	522	185	0.354406	-1.49652	0.0337633	0.726607	Down	11.257	3.82506	6:136380990:136400810:1	Zfyve21
ENSRNOT00000063951	18712.5	2578	34847	13.5171	3.75671	1.02623e-07	2.90892e-05	Up	16.548	214.774	2:78103387:78257134:1	Fam134b
ENSRNOT00000064023	12.5	25	0	0	#NAME?	0.0477266	0.870396	Down	0.50041	4.4131e-07	1:271229036:271243517:1	Rn50_1_2787.2
ENSRNOT00000064041	294.5	432	157	0.363426	-1.46027	0.0465462	0.864763	Down	1.56354	0.546122	8:48805684:48834312:1	Bcl9l
ENSRNOT00000064305	781	68	1494	21.9706	4.4575	2.64943e-10	1.31425e-07	Up	0.645878	13.6919	1:80820050:80835701:-1	PVR
ENSRNOT00000064349	12.5	0	25	Inf	Inf	0.0477266	0.870396	Up	0.000884369	0.264499	7:63467216:63499353:1	LOC100909505
ENSRNOT00000064395	55	99	11	0.111111	-3.16993	0.0220167	0.569565	Down	0.233802	0.0252121	3:111699087:111759714:1	Mga
ENSRNOT00000064438	1053.5	506	1601	3.16403	1.66176	0.00583421	0.24371	Up	4.40015	13.3808	1:140584380:140593745:1	Aen
ENSRNOT00000064450	510	272	748	2.75	1.45943	0.0261926	0.626845	Up	1.31727	3.48117	10:107292828:107324355:-1	Usp36
ENSRNOT00000064551	23.5	45	2	0.0444444	-4.49185	0.0381859	0.774729	Down	0.136616	0.00439256	8:22822412:22874637:-1	Dock6
ENSRNOT00000064731	18	36	0	0	#NAME?	0.0178441	0.499232	Down	0.297405	0.000697282	19:14523570:14560830:1	Mcm5
ENSRNOT00000064751	29.5	58	1	0.0172414	-5.85798	0.00871363	0.321368	Down	0.31064	0.00398443	11:34052110:34094696:1	Morc3
ENSRNOT00000064836	57.5	99	16	0.161616	-2.62936	0.046397	0.862801	Down	1.74385	0.264785	1:8830412:8878136:-1	Vta1
ENSRNOT00000065128	1068	329	1807	5.4924	2.45744	7.28404e-05	0.00835433	Up	3.10796	16.3792	3:8968417:8979889:-1	Crat
ENSRNOT00000065304	7208	4116	10300	2.50243	1.32333	0.0272125	0.639752	Up	60.6786	145.82	7:121480723:121482772:1	Atf4
ENSRNOT00000065346	77	134	20	0.149254	-2.74416	0.0200882	0.533587	Down	1.94942	0.2854	2:154486012:154508641:-1	RGD1565059
ENSRNOT00000065633	3510.5	1911	5110	2.67399	1.419	0.0145967	0.442857	Up	12.3444	31.6903	10:25903925:25910298:-1	Ccng1
ENSRNOT00000065839	19	38	0	0	#NAME?	0.0150895	0.449558	Down	1.84214	5.8273e-18	9:4875036:4876023:-1	Sult1c2a
ENSRNOT00000066178	232.5	373	92	0.246649	-2.01947	0.0108094	0.36532	Down	2.9822	0.709197	2:211480400:211527919:-1	Gpsm2
ENSRNOT00000066193	149	269	29	0.107807	-3.21348	0.000744979	0.055571	Down	3.91135	0.40861	3:5453614:5458782:-1	LOC100911917
ENSRNOT00000066549	25.5	0	51	Inf	Inf	0.00542132	0.233847	Up	1.45595e-08	1.08468	5:151089946:151117042:-1	Fam76a
ENSRNOT00000066597	134.5	243	26	0.106996	-3.22437	0.00107644	0.072158	Down	8.61464	0.896931	1:189347736:189359730:-1	RGD1559600
ENSRNOT00000066839	45.5	89	2	0.0224719	-5.47573	0.00207702	0.118767	Down	0.82445	0.0215952	9:95221474:95302822:1	Ugt1a8
ENSRNOT00000066917	116	208	24	0.115385	-3.11548	0.00253092	0.137963	Down	0.759083	0.0842318	8:108958099:109342731:1	Stag1
ENSRNOT00000067021	25	50	0	0	#NAME?	0.00586044	0.24378	Down	0.365144	3.3926e-12	12:12714394:12738641:-1	Pms2
ENSRNOT00000067141	2557.5	1091	4024	3.68836	1.88298	0.00134013	0.084148	Up	26.4108	93.5679	19:53635688:53643964:1	Map1lc3b2
ENSRNOT00000067231	184.5	74	295	3.98649	1.99512	0.0180377	0.500566	Up	3.88565	14.8852	16:61765344:61769456:1	Leprotl1
ENSRNOT00000067349	57	12	102	8.5	3.08746	0.0229467	0.582235	Up	0.102194	0.821721	5:150084611:150167077:-1	Epb4.1
ENSRNOT00000067384	1411.5	652	2171	3.32975	1.73542	0.00343072	0.171461	Up	2.07907	6.65137	1:239412884:239474931:1	Tmem2
ENSRNOT00000067391	68463.5	3829	133098	34.7605	5.11938	5.24606e-09	2.16859e-06	Up	207.028	6910.43	19:11307967:11308740:-1	Mt2A
ENSRNOT00000067445	24.5	0	49	Inf	Inf	0.00633419	0.258076	Up	6.12709e-05	0.59833	13:47421696:47438360:-1	Pfkfb2
ENSRNOT00000067448	42.5	3	82	27.3333	4.77259	0.00570317	0.24026	Up	0.00990523	0.30265	12:1682527:1816414:-1	Insr
ENSRNOT00000067455	975.5	1371	580	0.423049	-1.2411	0.0385528	0.778986	Down	7.57431	3.07765	5:150684133:150704117:-1	Sesn2
ENSRNOT00000067554	216.5	56	377	6.73214	2.75107	0.000962574	0.0673141	Up	0.371441	2.38434	18:58270410:58301002:1	Apcdd1
ENSRNOT00000067562	308.5	148	469	3.16892	1.66399	0.0226657	0.579553	Up	3.2364	9.83203	1:100471066:100473325:1	Aspdh
ENSRNOT00000067574	530.5	955	106	0.110995	-3.17144	5.50811e-06	0.000948972	Down	5.40659	0.5752	5:159755535:159773699:1	Arhgef19
ENSRNOT00000067646	865	417	1313	3.14868	1.65475	0.00701429	0.274512	Up	3.56993	10.7915	3:105661044:105663457:-1	Zfp770
ENSRNOT00000067688	270	37	503	13.5946	3.76496	5.73264e-06	0.000963958	Up	0.31077	4.1087	9:42880217:42884855:1	Arid5a
ENSRNOT00000067776	64	123	5	0.0406504	-4.62059	0.00126589	0.0820843	Down	0.947706	0.0347913	15:52292765:52320385:-1	Dmtn
ENSRNOT00000067780	7354.5	1133	13576	11.9823	3.58284	4.13669e-08	1.32387e-05	Up	13.1284	151.017	19:26092974:26094756:-1	Junb
ENSRNOT00000067823	26	1	51	51	5.67243	0.0143386	0.439054	Up	0.0117647	0.404757	5:25577593:25583834:-1	Pdp1
ENSRNOT00000067838	313.5	482	145	0.30083	-1.73298	0.0174532	0.49614	Down	6.08126	1.75312	10:103972888:103984402:1	Kctd2
ENSRNOT00000067931	194	318	70	0.220126	-2.1836	0.00914761	0.331822	Down	0.936026	0.197539	4:145704779:146016325:-1	Atp2b2
ENSRNOT00000068078	6433	2710	10156	3.7476	1.90597	0.00162503	0.0977086	Up	48.0902	173.05	X:43626480:43629765:1	Sat1
ENSRNOT00000068184	3886.5	2202	5571	2.52997	1.33912	0.0212544	0.554907	Up	10.3812	25.2268	20:32213148:32232632:-1	Ddx21
ENSRNOT00000068764	1980.5	1065	2896	2.71925	1.44321	0.0130081	0.407752	Up	12.6758	33.0838	19:53487619:53625673:-1	Fbxo31
ENSRNOT00000070821	71.5	143	0	0	#NAME?	5.58949e-06	0.000948972	Down	1.81918	9.24196e-12	2:86996798:87011171:1	Zfp455
ENSRNOT00000070873	12.5	0	25	Inf	Inf	0.0477266	0.870396	Up	0.000292003	0.163073	3:5519990:5551707:1	Adamts13
ENSRNOT00000070886	191.5	47	336	7.14894	2.83773	0.00105012	0.0712817	Up	0.88056	6.07257	20:5240975:5244386:-1	RT1-DMa
ENSRNOT00000070912	2677	214	5140	24.0187	4.58609	4.16955e-12	3.06416e-09	Up	1.22054	28.1866	3:109862120:109873466:1	Thbs1
ENSRNOT00000071109	1327	1908	746	0.390985	-1.35481	0.0213445	0.555937	Down	25.0902	9.41687	1:219329574:219335043:1	Cabp2
ENSRNOT00000071200	365.5	531	200	0.376648	-1.40871	0.0436654	0.829099	Down	4.92565	1.77849	9:95161157:95302822:1	Ugt1a8
ENSRNOT00000071239	14.5	0	29	Inf	Inf	0.0330694	0.717902	Up	3.74599e-31	0.819547	1:86873253:86888958:1	Fbxo27
ENSRNOT00000071388	937	1350	524	0.388148	-1.36532	0.0237782	0.593467	Down	9.29501	3.4674	13:36257112:36290531:-1	Steap3
ENSRNOT00000071483	21.5	0	43	Inf	Inf	0.0101092	0.347659	Up	0.008339	1.82439	11:72921282:72929003:-1	Ncbp2
ENSRNOT00000071487	138	58	218	3.75862	1.9102	0.0378352	0.771886	Up	0.491385	1.78731	10:109893954:109901859:1	Lrrc45
ENSRNOT00000071528	29.5	0	59	Inf	Inf	0.00289628	0.15044	Up	0.00122003	1.32793	1:214389255:214394411:-1	Pddc1
ENSRNOT00000071612	279.5	480	79	0.164583	-2.60311	0.000782643	0.0575156	Down	7.9039	1.25162	18:55391388:55392641:1	RGD1309362
ENSRNOT00000071634	16.5	0	33	Inf	Inf	0.0231482	0.582878	Up	0.000740128	1.06511	X:1543244:1543849:1	AABR07036746.1
ENSRNOT00000071663	29	58	0	0	#NAME?	0.00313319	0.160129	Down	0.892497	1.96867e-06	20:28722580:28783589:-1	2019-09-10
ENSRNOT00000071758	13.5	27	0	0	#NAME?	0.0396317	0.782461	Down	0.397411	4.18091e-12	1:38582629:38586563:-1	LOC501406
ENSRNOT00000071998	584	876	292	0.333333	-1.58496	0.013919	0.427526	Down	7.84309	2.50607	7:123079537:123088279:-1	Tob2
ENSRNOT00000072019	100	173	27	0.156069	-2.67974	0.0118225	0.385066	Down	8.69928	1.3153	17:43616247:43616657:1	Hist1h2ail1
ENSRNOT00000072024	20	39	1	0.025641	-5.2854	0.0334894	0.723852	Down	0.353772	0.010492	12:41341417:41363161:1	Oas2
ENSRNOT00000072119	55.5	110	1	0.00909091	-6.78136	0.00022205	0.021388	Down	5.52292	0.0320309	17:43633675:43634085:1	LOC690126
ENSRNOT00000072444	16.5	0	33	Inf	Inf	0.0231482	0.582878	Up	0.000740128	1.06511	X:1600790:1601395:1	LOC103690796
ENSRNOT00000072618	114	188	40	0.212766	-2.23266	0.0247766	0.606934	Down	0.8208	0.166687	5:154522119:154540265:1	E2f2
ENSRNOT00000072778	733	211	1255	5.94787	2.57237	7.04769e-05	0.0082259	Up	1.65034	9.43698	16:6064288:6072740:-1	Il17rb
ENSRNOT00000072808	102.5	166	39	0.23494	-2.08964	0.0419884	0.811287	Down	3.18966	0.71128	X:153677811:153678884:1	AABR07042361.1
ENSRNOT00000072841	48.5	86	11	0.127907	-2.96683	0.0395873	0.782461	Down	0.410432	0.0488565	5:142332607:142376370:1	LOC100909856
ENSRNOT00000072868	17	0	34	Inf	Inf	0.0212047	0.554792	Up	3.20922e-09	0.241263	9:10450426:10471009:-1	Safb
ENSRNOT00000072952	31.5	63	0	0	#NAME?	0.00211412	0.119511	Down	0.321124	0.000181684	12:2070365:2097904:1	Pnpla6
ENSRNOT00000073000	1558.5	2210	907	0.410407	-1.28487	0.0275541	0.645488	Down	32.505	12.8089	9:9988057:10001962:1	Slc25a23
ENSRNOT00000073049	149.5	293	6	0.0204778	-5.60979	5.03313e-07	0.00011909	Down	3.08277	0.0625729	11:90403333:90406797:-1	Snai2
ENSRNOT00000073068	244	99	389	3.92929	1.97427	0.0114912	0.378751	Up	4.99834	18.8865	8:105087994:105088401:-1	LOC100365810
ENSRNOT00000073107	186.5	373	0	0	#NAME?	1.67634e-11	1.10873e-08	Down	20.3758	2.16209e-05	1:91041214:91042230:-1	Polr2i
ENSRNOT00000073155	990	576	1404	2.4375	1.2854	0.0320857	0.705815	Up	16.9082	39.5631	12:8746855:8759599:-1	Pomp
ENSRNOT00000073160	398.5	169	628	3.71598	1.89374	0.00654173	0.263288	Up	7.37538	26.2665	9:16802319:16807966:-1	LOC100910336
ENSRNOT00000073188	149.5	248	51	0.205645	-2.28177	0.0121086	0.391915	Down	12.4408	2.45747	17:43814773:43815183:-1	Hist1h2ail1
ENSRNOT00000073193	833.5	340	1327	3.90294	1.96456	0.00159935	0.0970468	Up	1.61386	6.04153	1:261106760:261140389:-1	Rrp12
ENSRNOT00000073228	3296	4971	1621	0.326091	-1.61665	0.00559283	0.238139	Down	45.1726	14.1441	6:26355296:26385761:-1	Gckr
ENSRNOT00000073233	3126.5	1897	4356	2.29626	1.19928	0.037579	0.768704	Up	28.2828	62.3826	1:188394814:188407132:-1	Gde1
ENSRNOT00000073241	919	229	1609	7.0262	2.81274	1.02161e-05	0.00156134	Up	2.66392	17.9834	1:282640706:282648156:1	Ces2
ENSRNOT00000073304	17.5	34	1	0.0294118	-5.08746	0.0486029	0.874323	Down	1.98615	0.0708927	6:138631604:138631997:-1	AABR07065651.3
ENSRNOT00000073321	30653.5	45218	16089	0.35581	-1.49082	0.0274459	0.644	Down	102.188	34.9159	10:109987735:110005901:-1	Fasn
ENSRNOT00000073341	258.5	0	517	Inf	Inf	5.62581e-14	6.97671e-11	Up	0.000205198	5.24271	4:156985046:157008947:-1	LOC103690024
ENSRNOT00000073575	847.5	1374	321	0.233624	-2.09774	0.000779395	0.0574898	Down	9.50709	2.13092	17:62262129:62265113:1	Fzd8
ENSRNOT00000073710	442	682	202	0.296188	-1.75542	0.00977376	0.34203	Down	1.12755	0.319949	2:22646712:22744407:-1	Cmya5
ENSRNOT00000073892	16	32	0	0	#NAME?	0.0252888	0.612675	Down	0.130933	0.000262682	14:91905919:91979500:-1	Ddc
ENSRNOT00000073910	4611.5	1564	7659	4.89706	2.29192	0.000142979	0.0148533	Up	18.0336	84.8183	6:60132024:60151420:-1	Ifrd1
ENSRNOT00000073951	15088	5713	24463	4.28199	2.09828	0.00119981	0.0790918	Up	86.1909	354.404	7:143629455:143633131:1	Krt18
ENSRNOT00000073952	42	76	8	0.105263	-3.24793	0.0369092	0.762574	Down	0.972679	0.0955905	18:35489274:35671676:1	Dcp2
ENSRNOT00000074005	229	84	374	4.45238	2.15458	0.00705164	0.27543	Up	0.940253	4.01556	19:53487613:53497006:-1	Fbxo31
ENSRNOT00000074209	6705	3210	10200	3.17757	1.66792	0.00558701	0.238139	Up	14.676	44.788	2:235738416:235760352:1	Etnppl
ENSRNOT00000074210	412.5	603	222	0.368159	-1.4416	0.0345411	0.737743	Down	2.57079	0.909951	19:21964793:21970103:-1	AABR07043115.1
ENSRNOT00000074226	539.5	860	219	0.254651	-1.97341	0.00282948	0.149315	Down	3.92931	0.960469	18:47500330:47513065:-1	Lox
ENSRNOT00000074292	248.5	400	97	0.2425	-2.04394	0.00874097	0.321778	Down	20.0781	4.66109	17:43626128:43626538:-1	LOC684841
ENSRNOT00000074301	88.5	0	177	Inf	Inf	5.78764e-07	0.000131998	Up	4.77773e-09	2.16243	1:88451958:88453578:1	LOC102549115
ENSRNOT00000074389	2225.5	1257	3194	2.54097	1.34538	0.0200445	0.533141	Up	8.67094	21.1482	17:63110254:63145577:-1	Gtpbp4
ENSRNOT00000074449	3068	1044	5092	4.87739	2.28611	0.000125482	0.0133861	Up	16.6723	78.1004	16:72401887:72403179:1	LOC100910163
ENSRNOT00000074583	446	188	704	3.74468	1.90484	0.00520175	0.227342	Up	1.58443	5.70703	1:14402913:14412807:-1	Tnfaip3
ENSRNOT00000074586	790.5	185	1396	7.54595	2.9157	7.50999e-06	0.00120172	Up	3.35238	24.3021	11:89008008:89009146:1	Cebpd
ENSRNOT00000074617	74.5	138	11	0.0797101	-3.64909	0.00376445	0.182627	Down	3.3007	0.253501	11:79547699:79548560:1	LOC100365839
ENSRNOT00000074667	463	253	673	2.66008	1.41147	0.0342803	0.733754	Up	1.28233	3.27243	17:15405995:15429051:-1	Nol8
ENSRNOT00000074763	493.5	744	243	0.326613	-1.61435	0.0149077	0.449542	Down	37.3663	11.7103	17:43807130:43807540:-1	LOC684762
ENSRNOT00000074873	34.5	0	69	Inf	Inf	0.00131863	0.0832481	Up	0	0.95089	7:2351933:2353875:-1	LOC100911319
ENSRNOT00000074874	419	221	617	2.79186	1.48122	0.0295518	0.676318	Up	1.63763	4.38602	14:2463643:2474780:-1	LOC100910207
ENSRNOT00000074941	520	277	763	2.75451	1.4618	0.0254753	0.616367	Up	0.746697	1.97215	2:32859856:33025271:-1	NEWGENE_1310139
ENSRNOT00000074985	35	0	70	Inf	Inf	0.00121902	0.0798278	Up	2.48541e-09	1.40642	1:81328183:81344705:1	Plaur
ENSRNOT00000075035	1171	2058	284	0.137998	-2.85728	4.98715e-06	0.000875708	Down	23.3241	3.08686	1:189940291:189942112:1	Anks4b
ENSRNOT00000075065	331	528	134	0.253788	-1.9783	0.00645605	0.261965	Down	34.9822	8.52961	17:43617247:43617558:1	Hist1h4b
ENSRNOT00000075167	90.5	11	170	15.4545	3.94996	0.000897659	0.0636119	Up	0.234039	3.41228	1:81328183:81344708:1	Plaur
ENSRNOT00000075181	54.5	3	106	35.3333	5.14296	0.00129345	0.0832481	Up	0.0417225	1.40061	2:213420314:213421811:-1	LOC100911617
ENSRNOT00000075193	81	16	146	9.125	3.18982	0.00712005	0.27647	Up	0.0563034	0.498908	6:60566196:60782556:1	Dock4
ENSRNOT00000075237	106	32	180	5.625	2.49185	0.0158191	0.465702	Up	0.456512	2.45602	8:23142734:23148396:-1	Acp5
ENSRNOT00000075292	2285	1368	3202	2.34064	1.22691	0.0333901	0.723852	Up	16.4693	37.0108	19:59499876:59502161:-1	Irf2bp2
ENSRNOT00000075363	17.5	34	1	0.0294118	-5.08746	0.0486029	0.874323	Down	1.98615	0.0708927	6:138900522:138900915:-1	AABR07065656.3
ENSRNOT00000075400	56	106	6	0.0566038	-4.14296	0.00463642	0.20913	Down	3.10563	0.176264	4:97657671:97760102:1	Gng12
ENSRNOT00000075543	28	0	56	Inf	Inf	0.00366611	0.17917	Up	0.00196705	1.64493	18:69841125:69849389:1	Mro
ENSRNOT00000075570	230	44	416	9.45455	3.24101	0.000115193	0.0126279	Up	0.228092	2.07229	1:271252447:271275989:-1	LOC100912218
ENSRNOT00000075589	160	276	44	0.15942	-2.64909	0.00342492	0.171461	Down	3.82579	0.582491	7:15198967:15225309:-1	Cyp4f6
ENSRNOT00000075680	1049	1511	587	0.388484	-1.36407	0.0225374	0.57776	Down	9.86223	3.67721	1:257614731:257657252:1	LOC100911660
ENSRNOT00000075799	21	0	42	Inf	Inf	0.0109364	0.36532	Up	2.60239e-06	0.188655	4:154423209:154472924:1	A2m
ENSRNOT00000075800	877.5	424	1331	3.13915	1.65037	0.00707219	0.27569	Up	1.95891	5.9109	20:28815039:28819505:1	Sowahc
ENSRNOT00000075863	13	0	26	Inf	Inf	0.0434723	0.826314	Up	8.41831e-08	0.446001	14:81819459:81830780:1	Mxd4
ENSRNOT00000075873	15	30	0	0	#NAME?	0.030231	0.683972	Down	0.82127	0.0112558	7:116356330:116359164:1	Ly6e
ENSRNOT00000075878	627	282	972	3.44681	1.78526	0.00539702	0.233847	Up	2.23943	7.42057	4:14039977:14241272:1	Cd36
ENSRNOT00000075948	44.5	0	89	Inf	Inf	0.000279313	0.0260193	Up	1.35059e-05	3.09695	13:82739406:82753438:-1	Atp1b1
ENSRNOT00000076022	52.5	4	101	25.25	4.65821	0.00286763	0.150131	Up	0.018659	0.491066	10:11393103:11512402:1	Adcy9
ENSRNOT00000076105	166	269	63	0.234201	-2.09418	0.0165289	0.478783	Down	3.91919	0.877819	6:26387877:26389518:1	Fndc4
ENSRNOT00000076137	47	7	87	12.4286	3.63559	0.0168496	0.485945	Up	0.0545479	0.615597	18:15883182:15898821:1	Zfp35
ENSRNOT00000076138	486.5	797	176	0.220828	-2.179	0.00130633	0.0832481	Down	3.44029	0.730051	19:17414819:17494585:-1	Chd9
ENSRNOT00000076159	36	72	0	0	#NAME?	0.001042	0.0712817	Down	0.303529	8.6248e-06	18:86116055:86247156:1	Rttn
ENSRNOT00000076325	124.5	53	196	3.69811	1.88679	0.0473833	0.870396	Up	2.41973	8.56404	2:189330902:189333322:-1	Hax1
ENSRNOT00000076592	33.5	0	67	Inf	Inf	0.00154315	0.094213	Up	5.11019e-13	1.81882	1:167336740:167347671:-1	Rhog
ENSRNOT00000076596	185	76	294	3.86842	1.95174	0.0203975	0.539194	Up	0.437552	1.62309	10:70157624:70220582:-1	Rffl
ENSRNOT00000076606	333.5	562	105	0.186833	-2.42018	0.00103937	0.0712817	Down	3.36066	0.603075	7:116653664:116661942:1	LOC100910508
ENSRNOT00000076611	1322.5	263	2382	9.05703	3.17904	4.56236e-07	0.000111761	Up	1.90865	16.5681	14:46001849:46041866:1	Rell1
ENSRNOT00000076763	101	167	35	0.209581	-2.25442	0.0301976	0.683972	Down	8.55647	1.71371	16:81230096:81243221:-1	Gas6
ENSRNOT00000076783	122	209	35	0.167464	-2.57808	0.00894658	0.32632	Down	0.290523	0.0471762	1:170471272:170564899:1	Dnhd1
ENSRNOT00000076818	12.5	25	0	0	#NAME?	0.0477266	0.870396	Down	0.545346	1.02135e-23	20:46429222:46505895:1	Foxo3
ENSRNOT00000076881	467	143	791	5.53147	2.46766	0.000354635	0.0314137	Up	1.96572	10.4729	14:45982244:46040373:1	Rell1
ENSRNOT00000076938	20.5	0	41	Inf	Inf	0.011838	0.385066	Up	0	1.11486	X:63803189:63803915:-1	Maged1
ENSRNOT00000076983	18	0	36	Inf	Inf	0.0178441	0.499232	Up	1.33598e-06	0.963273	20:5108692:5112872:-1	Csnk2b
ENSRNOT00000076985	22	44	0	0	#NAME?	0.00934839	0.335042	Down	0.382496	9.38058e-05	13:78836587:78851600:-1	Zbtb37
ENSRNOT00000077005	22	0	44	Inf	Inf	0.00934839	0.335042	Up	0.000867578	0.861755	9:94316717:94325452:1	Eif4e2
ENSRNOT00000077122	321	479	163	0.340292	-1.55515	0.0310586	0.693991	Down	3.52169	1.15262	7:12144162:12168410:1	Tcf3
ENSRNOT00000077157	881.5	381	1382	3.6273	1.85889	0.00256945	0.13968	Up	5.74535	20.0354	13:72742211:72744303:-1	Ier5
ENSRNOT00000077177	39604.5	4248	74961	17.6462	4.14128	8.56431e-08	2.53631e-05	Up	57.42	972.992	14:87448692:87453785:1	Igfbp1
ENSRNOT00000077202	36	72	0	0	#NAME?	0.001042	0.0712817	Down	1.14791	1.56204e-05	5:168019058:168035792:1	Tnfrsf9
ENSRNOT00000077261	13	0	26	Inf	Inf	0.0434723	0.826314	Up	1.16332e-09	0.163247	10:70326475:70341837:-1	Slfn13
ENSRNOT00000077382	13.5	0	27	Inf	Inf	0.0396317	0.782461	Up	5.16628e-06	0.0641691	7:107467260:107652897:1	Tg
ENSRNOT00000077537	24	0	48	Inf	Inf	0.00684588	0.27212	Up	9.37654e-07	0.45597	2:30612747:30634243:-1	Marveld2
ENSRNOT00000077598	117.5	37	198	5.35135	2.4199	0.0147122	0.445679	Up	0.451468	2.34683	2:84361207:84437084:-1	Ankrd33b
ENSRNOT00000077727	268	142	394	2.77465	1.4723	0.049852	0.889673	Up	1.69343	4.5275	11:64882288:64919579:1	Pla1a
ENSRNOT00000077770	56	112	0	0	#NAME?	5.02753e-05	0.00612001	Down	1.03832	5.83804e-06	6:135680615:135715273:1	Traf3
ENSRNOT00000077771	26	0	52	Inf	Inf	0.00501442	0.220612	Up	1.44348e-08	2.91634	6:139486775:139487235:1	AABR07065699.3
ENSRNOT00000077776	3767.5	2305	5230	2.26898	1.18204	0.0410996	0.801079	Up	19.6261	42.7607	1:214410417:214414897:-1	Slc25a22
ENSRNOT00000077782	21	0	42	Inf	Inf	0.0109364	0.36532	Up	0.00780334	1.16704	2:93758919:93766670:1	Fabp12
ENSRNOT00000077856	975.5	90	1861	20.6778	4.37001	1.7615e-10	9.1978e-08	Up	1.15885	22.9376	7:140349138:140356209:-1	Rnd1
ENSRNOT00000077894	75.5	11	140	12.7273	3.66985	0.00343925	0.171461	Up	0.297621	3.72859	6:25598936:25616995:-1	Fosl2
ENSRNOT00000077956	31.5	63	0	0	#NAME?	0.00211412	0.119511	Down	0.541818	1.74967e-05	1:204717833:204817080:-1	Fam53b
ENSRNOT00000078070	1323.5	752	1895	2.51995	1.33339	0.0234312	0.587023	Up	4.83649	11.7057	3:125169135:125213607:-1	Gpcpd1
ENSRNOT00000078096	243	104	382	3.67308	1.87699	0.0160082	0.469873	Up	0.377176	1.32789	1:184301493:184407478:1	Insc
ENSRNOT00000078110	52	103	1	0.00970874	-6.6865	0.000358848	0.0316456	Down	2.3027	0.027285	20:3242470:3249189:1	LOC100909797
ENSRNOT00000078148	153	238	68	0.285714	-1.80735	0.0414858	0.806645	Down	2.38776	0.651076	2:116398674:116413043:-1	Mynn
ENSRNOT00000078255	26.5	53	0	0	#NAME?	0.00463749	0.20913	Down	0.554038	0.00213109	4:45034123:45247782:1	ST7
ENSRNOT00000078267	25.5	0	51	Inf	Inf	0.00542132	0.233847	Up	0.00302131	1.73903	4:164042258:164049599:-1	AABR07062183.1
ENSRNOT00000078477	14.5	29	0	0	#NAME?	0.0330694	0.717902	Down	0.0646133	0.000142089	1:104635989:104940171:1	Nav2
ENSRNOT00000078532	1763	251	3275	13.0478	3.70574	6.29057e-09	2.54729e-06	Up	6.09011	76.2466	17:67899033:67904674:-1	Klf6
ENSRNOT00000078657	28	54	2	0.037037	-4.75489	0.021222	0.554792	Down	1.0806	0.0297016	1:220470129:220474129:1	Yif1a
ENSRNOT00000078662	13.5	27	0	0	#NAME?	0.0396317	0.782461	Down	0.268254	0	10:43744882:43752242:1	Zfp692
ENSRNOT00000078692	15	0	30	Inf	Inf	0.030231	0.683972	Up	1.98981e-22	0.235386	1:102777296:102826965:-1	Hps5
ENSRNOT00000078800	167.5	79	256	3.24051	1.69622	0.0483192	0.874323	Up	0.520037	1.60906	9:61231988:61418679:-1	Ankrd44
ENSRNOT00000078809	285	439	131	0.298405	-1.74465	0.0193051	0.522008	Down	3.45046	0.989119	1:61870347:61872975:-1
ENSRNOT00000078856	1276	283	2269	8.01767	3.00318	1.63994e-06	0.000322176	Up	2.65921	20.4681	11:47260641:47270163:1	Nfkbiz
ENSRNOT00000078906	607.5	355	860	2.42254	1.27652	0.0445267	0.839827	Up	1.24539	2.89847	17:66446162:66613839:1	Heatr1
ENSRNOT00000078928	164.5	0	329	Inf	Inf	1.24778e-10	6.87737e-08	Up	0.000968699	3.7387	7:126641952:126681708:1	Ppara
ENSRNOT00000078936	118.5	43	194	4.51163	2.17365	0.0263507	0.626921	Up	0.501175	2.16473	11:67101714:67118795:1	Cd86
ENSRNOT00000078960	16	0	32	Inf	Inf	0.0252888	0.612675	Up	0.00326018	0.380125	10:35148022:35175647:-1	Cnot6
ENSRNOT00000079021	16.5	0	33	Inf	Inf	0.0231482	0.582878	Up	8.50399e-05	1.12748	20:2088681:2092433:1	Znrd1
ENSRNOT00000079036	4915	792	9038	11.4116	3.51243	3.40047e-08	1.12454e-05	Up	8.7077	95.4527	7:99142450:99181773:1	Cyp2b1
ENSRNOT00000079080	19.5	1	38	38	5.24793	0.0360121	0.753286	Up	0.00353817	0.236939	10:105500290:105504393:1	Sphk1
ENSRNOT00000079122	31	62	0	0	#NAME?	0.00228727	0.126418	Down	0.8659	7.64977e-11	8:68055972:68275720:-1	Map2k5
ENSRNOT00000079176	29.5	59	0	0	#NAME?	0.00289628	0.15044	Down	2.73573	2.94126e-05	12:30126184:30151415:-1	Crcp
ENSRNOT00000079185	1387.5	738	2037	2.76016	1.46475	0.0128713	0.405383	Up	4.19506	11.115	6:42852683:42859927:1	Odc1
ENSRNOT00000079227	571.5	14	1129	80.6429	6.33347	2.457e-14	3.51222e-11	Up	0.134965	10.3483	1:250692135:250774105:-1	Sgms1
ENSRNOT00000079260	462	47	877	18.6596	4.22184	2.41938e-08	8.2768e-06	Up	1.30163	23.5285	17:78491945:78499881:-1	Fam107b
ENSRNOT00000079310	52051	17277	86825	5.02547	2.32926	0.00169271	0.101471	Up	187.706	905.862	3:75643054:75644954:1	LOC100361457
ENSRNOT00000079497	21	41	1	0.0243902	-5.35755	0.0290185	0.669237	Down	0.479104	0.0141078	1:69736684:69740201:-1	Zfp772
ENSRNOT00000079510	27.5	0	55	Inf	Inf	0.00396525	0.188226	Up	7.21399e-17	0.606037	12:44046239:44134674:1	Fbxw8
ENSRNOT00000079573	56.5	98	15	0.153061	-2.70782	0.0425079	0.818875	Down	1.37831	0.204051	12:11162843:11175917:-1	Zkscan5
ENSRNOT00000079646	233	94	372	3.95745	1.98457	0.0120929	0.391915	Up	1.24548	4.72497	10:25903911:25910325:-1	Ccng1
ENSRNOT00000079651	79	143	15	0.104895	-3.25298	0.0067733	0.270959	Down	1.93977	0.198979	19:53487826:53625665:-1	Fbxo31
ENSRNOT00000079680	769.5	1136	403	0.354754	-1.49511	0.015718	0.464795	Down	4.51743	1.54004	X:44830849:44988548:1	Tbl1x
ENSRNOT00000079707	32	0	64	Inf	Inf	0.00195407	0.114023	Up	1.27605e-05	1.7308	13:48689962:48704771:1	Nucks1
ENSRNOT00000079727	20	39	1	0.025641	-5.2854	0.0334894	0.723852	Down	0.217492	0.0055719	3:103773459:103850232:1	Slc12a6
ENSRNOT00000079767	602	342	862	2.52047	1.33369	0.0363215	0.755441	Up	4.16227	10.0573	14:11198896:11202325:1	Hnrnpdl
ENSRNOT00000079776	123	49	197	4.02041	2.00734	0.0364845	0.757244	Up	0.29963	1.14778	2:195861649:195908037:-1	Tuft1
ENSRNOT00000079784	26.5	3	50	16.6667	4.05889	0.0418354	0.809852	Up	0.0149051	0.268543	16:20109200:20120446:1	Jak3
ENSRNOT00000079941	427.5	174	681	3.91379	1.96857	0.00425954	0.198865	Up	6.59719	24.7275	scaffold:Rnor_6.0:KL568423.1:501:1430:1	LOC103694879
ENSRNOT00000079985	1821.5	1068	2575	2.41105	1.26966	0.0285272	0.661258	Up	23.71	54.9073	scaffold:Rnor_6.0:AABR07024291.1:113521:132313:1	Ppp2ca
ENSRNOT00000080024	17.5	1	34	34	5.08746	0.0486029	0.874323	Up	0.00462992	0.209359	7:76199311:76488216:-1	Ncald
ENSRNOT00000080152	56.5	1	112	112	6.80735	0.000193774	0.0188474	Up	0.00582044	1.10865	7:125189827:125275977:1	Parvb
ENSRNOT00000080266	340	573	107	0.186736	-2.42092	0.00098588	0.068638	Down	6.74473	1.21344	3:80075991:80081047:1	Pacsin3
ENSRNOT00000080337	70	12	128	10.6667	3.41504	0.00729755	0.282541	Up	0.12373	1.3136	19:23936505:23944820:-1	Zfp330
ENSRNOT00000080448	42	0	84	Inf	Inf	0.000409713	0.0358128	Up	0.00508361	2.28586	8:62193705:62215293:-1	NEWGENE_1306267
ENSRNOT00000080562	596	69	1123	16.2754	4.02462	1.89042e-08	6.81997e-06	Up	1.09298	17.0181	11:81424252:81444490:-1	Kng1l1
ENSRNOT00000080591	446.5	656	237	0.36128	-1.46881	0.0289086	0.667759	Down	5.68237	1.9683	5:172559135:172623899:-1	Ski
ENSRNOT00000080608	1226	1897	555	0.292567	-1.77316	0.003046	0.156577	Down	9.07188	2.54966	8:81863619:81941536:1	Fam214a
ENSRNOT00000080623	77.5	151	4	0.0264901	-5.2384	0.000163486	0.0164665	Down	0.583292	0.0144894	6:135747740:135829953:-1	Cdc42bpb
ENSRNOT00000080628	95	190	0	0	#NAME?	2.53044e-07	6.52065e-05	Down	3.40129	0.000189201	17:49955375:49991059:-1	Mplkip
ENSRNOT00000080632	53.5	8	99	12.375	3.62936	0.0117393	0.38501	Up	0.428829	5.05581	2:123617794:123631618:1	RGD1307100
ENSRNOT00000080654	174.5	292	57	0.195205	-2.35693	0.00675309	0.270696	Down	1.43016	0.266787	4:78067689:78074906:-1	Zfp467
ENSRNOT00000080689	46.5	93	0	0	#NAME?	0.000206136	0.019952	Down	1.05545	1.12451e-05	1:243375981:243398527:1	Kank1
ENSRNOT00000080703	38.5	0	77	Inf	Inf	0.000704862	0.0531782	Up	2.96518e-07	0.606697	10:64567466:64657089:-1	Abr
ENSRNOT00000080786	110.5	188	33	0.175532	-2.51019	0.01368	0.420835	Down	1.82073	0.311108	2:60131776:60308152:1	Prlr
ENSRNOT00000080811	70.5	18	123	6.83333	2.77259	0.0235399	0.588259	Up	0.161099	1.06216	4:8066907:8184681:1	Srpk2
ENSRNOT00000080824	909	1486	332	0.223419	-2.16218	0.000501041	0.0419479	Down	22.6786	4.86706	7:31816606:31824071:-1	Slc25a3
ENSRNOT00000080848	13	0	26	Inf	Inf	0.0434723	0.826314	Up	5.44761e-05	0.631965	14:85947812:85951899:-1	Mrps24
ENSRNOT00000080995	452	116	788	6.7931	2.76407	8.67202e-05	0.00977672	Up	1.20805	7.89729	1:282640722:282702424:1	Ces2
ENSRNOT00000081017	1446	2024	868	0.428854	-1.22144	0.0365271	0.757335	Down	8.17216	3.36321	1:41325462:41594796:1	Esr1
ENSRNOT00000081145	48	96	0	0	#NAME?	0.000164393	0.0164742	Down	1.46456	3.45821e-11	8:32188617:32214469:1	Zbtb44
ENSRNOT00000081246	32.5	4	61	15.25	3.93074	0.0303902	0.686567	Up	0.0201831	0.27746	19:11106033:11144641:-1	Slc12a3
ENSRNOT00000081248	98.5	163	34	0.208589	-2.26127	0.0312906	0.696821	Down	1.74484	0.346144	2:236625357:236680771:1	Papss1
ENSRNOT00000081272	44	5	83	16.6	4.05311	0.011811	0.385066	Up	0.0640696	0.946031	3:148310592:148312420:-1	Bcl2l1
ENSRNOT00000081353	1453.5	315	2592	8.22857	3.04064	1.06428e-06	0.000224653	Up	3.42393	27.0834	8:116324040:116328978:1	Hyal2
ENSRNOT00000081497	34	2	66	33	5.04439	0.00957614	0.337534	Up	0.0149899	0.570156	9:64643281:64843928:1	Spats2l
ENSRNOT00000081551	67.5	18	117	6.5	2.70044	0.0295965	0.67656	Up	0.186897	1.1353	13:80712885:80738634:-1	Fmo1
ENSRNOT00000081570	74.5	149	0	0	#NAME?	3.70514e-06	0.00066232	Down	0.869819	1.66637e-21	14:80982162:81023682:-1	Rgs12
ENSRNOT00000081684	27	2	52	26	4.70044	0.0242021	0.598113	Up	0.140465	2.95279	6:139551751:139552182:1	AABR07065699.2
ENSRNOT00000081886	13.5	0	27	Inf	Inf	0.0396317	0.782461	Up	0	0.92733	10:1741216:1744647:-1	AABR07028997.1
ENSRNOT00000081891	709.5	1024	395	0.385742	-1.37429	0.0274581	0.644	Down	3.81594	1.41476	7:58366192:58419523:1	Zfc3h1
ENSRNOT00000081912	70.5	130	11	0.0846154	-3.56294	0.00540589	0.233847	Down	1.11766	0.0942917	15:45479658:45524582:-1	Gucy1b2
ENSRNOT00000081924	1048.5	412	1685	4.08981	2.03203	0.000871689	0.0628107	Up	3.46255	13.6082	20:4877324:4879779:-1	Hspa1b
ENSRNOT00000081970	165	286	44	0.153846	-2.70044	0.00266102	0.143182	Down	15.0463	2.19632	17:44747796:44748188:-1	LOC103690190
ENSRNOT00000082005	2095.5	1016	3175	3.125	1.64386	0.00486381	0.215419	Up	6.69053	20.0715	9:119542328:119588715:1	Lpin2
ENSRNOT00000082082	66.5	133	0	0	#NAME?	1.12006e-05	0.00168365	Down	1.38012	1.04916e-05	10:3179352:3213237:1	Rrn3
ENSRNOT00000082091	588.5	987	190	0.192503	-2.37705	0.000330253	0.0300591	Down	20.3658	3.76477	16:60418423:60426561:-1	Ppp1r3b
ENSRNOT00000082097	13	0	26	Inf	Inf	0.0434723	0.826314	Up	5.66148e-05	0.463241	8:111839091:111850075:-1	Cdv3
ENSRNOT00000082136	39	3	75	25	4.64386	0.00883703	0.323407	Up	0.0966146	2.25863	20:4039413:4047093:1	RT1-Bb
ENSRNOT00000082140	134.5	211	58	0.274882	-1.86312	0.0442608	0.837071	Down	2.98237	0.789171	17:36690249:36694325:1	Hmgb3
ENSRNOT00000082146	6853	3146	10560	3.35664	1.74702	0.00383465	0.185224	Up	18.8756	60.8507	9:46962288:47036670:1	Il1r1
ENSRNOT00000082209	89.5	12	167	13.9167	3.79874	0.0013216	0.0832481	Up	0.104519	1.43622	10:109894286:109903784:1	Lrrc45
ENSRNOT00000082383	310	60	560	9.33333	3.22239	3.55401e-05	0.00457914	Up	0.319164	2.86271	X:15598652:15617665:1	Ccdc120
ENSRNOT00000082408	76	12	140	11.6667	3.54432	0.00430113	0.19946	Up	0.145814	1.57763	9:46997798:47035275:1	Il1r1
ENSRNOT00000082421	24	0	48	Inf	Inf	0.00684588	0.27212	Up	1.59615e-05	1.20382	X:63281779:63291371:-1	Eif2s3
ENSRNOT00000082442	303.5	125	482	3.856	1.94711	0.00849942	0.317003	Up	1.25876	4.66701	1:233124092:233145941:-1	Psat1
ENSRNOT00000082469	338.5	167	510	3.05389	1.61065	0.0240724	0.598113	Up	1.85597	5.46011	13:90533365:90591796:1	Dcaf8
ENSRNOT00000082535	20.5	41	0	0	#NAME?	0.011838	0.385066	Down	0.445814	3.2994e-11	12:11154807:11157583:-1	Zkscan5
ENSRNOT00000082551	181.5	342	21	0.0614035	-4.02554	1.85415e-05	0.00266594	Down	2.38017	0.14	10:109893700:109904072:1	Lrrc45
ENSRNOT00000082582	15.5	0	31	Inf	Inf	0.0276437	0.646062	Up	0	0.39943	1:107344904:107363607:1	Gas2
ENSRNOT00000082594	31.5	58	5	0.0862069	-3.53605	0.0481424	0.874323	Down	0.415613	0.0337943	11:71151132:71197035:1	Rubcn
ENSRNOT00000082672	4885.5	2751	7020	2.5518	1.35151	0.0211955	0.554792	Up	7.30911	17.9108	3:8534476:8599260:1	Sptan1
ENSRNOT00000082677	273.5	14	533	38.0714	5.25064	7.50406e-09	2.97791e-06	Up	0.0599837	2.1441	13:83721300:83787018:1	Adcy10
ENSRNOT00000082844	47.5	94	1	0.0106383	-6.55459	0.000670162	0.0514026	Down	0.378627	0.00550913	13:98311827:98447312:1	Cdc42bpa
ENSRNOT00000082931	38.5	0	77	Inf	Inf	0.000704862	0.0531782	Up	1.44894e-12	0.944303	1:43792199:43831932:-1	Cnksr3
ENSRNOT00000082999	41.5	0	83	Inf	Inf	0.000442541	0.0380126	Up	0.000173407	1.62451	20:3372413:3374344:-1	Ppp1r18
ENSRNOT00000083004	1832.5	383	3282	8.56919	3.09916	5.58638e-07	0.000130275	Up	2.72984	22.4443	8:128659868:128672284:-1	Csrnp1
ENSRNOT00000083194	53.5	0	107	Inf	Inf	7.25172e-05	0.00835433	Up	1.40648e-10	1.72338	8:22291463:22301325:1	Atg4d
ENSRNOT00000083212	33.5	67	0	0	#NAME?	0.00154315	0.094213	Down	0.873221	0.00554743	15:18539210:18546673:1	Pdhb
ENSRNOT00000083215	1685	2686	684	0.254654	-1.97339	0.000880181	0.0630489	Down	18.9742	4.64212	1:275846819:275882444:-1	Gpam
ENSRNOT00000083261	50.5	1	100	100	6.64386	0.000441496	0.0380126	Up	0.00873974	1.26586	12:38368693:38386653:1	Clip1
ENSRNOT00000083275	3899	1233	6565	5.32441	2.41262	6.11857e-05	0.00731354	Up	7.23841	37.0026	11:27382049:27398842:1	Bach1
ENSRNOT00000083283	113	184	42	0.228261	-2.13124	0.0319459	0.704565	Down	1.96744	0.431742	1:228732985:228755866:-1	Dtx4
ENSRNOT00000083286	41	0	82	Inf	Inf	0.000478072	0.0401945	Up	2.91317e-05	3.35072	6:99985519:100011226:-1	Max
ENSRNOT00000083287	698	399	997	2.49875	1.3212	0.0341688	0.732948	Up	1.52057	3.6485	1:261415191:261438539:1	Zfyve27
ENSRNOT00000083341	203	313	93	0.297125	-1.75086	0.0315066	0.700059	Down	1.20141	0.343511	5:157745490:157758084:-1	Pqlc2
ENSRNOT00000083351	374.5	24	725	30.2083	4.91687	2.41491e-09	1.04167e-06	Up	0.145406	4.16266	3:109862117:109872871:1	Thbs1
ENSRNOT00000083361	17.5	35	0	0	#NAME?	0.0194418	0.522008	Down	0.10713	0	2:179584308:179704629:-1	Gria2
ENSRNOT00000083410	123	33	213	6.45455	2.69032	0.00650984	0.262537	Up	0.431766	2.66083	8:82560971:82577019:1	Lysmd2
ENSRNOT00000083434	434	247	621	2.51417	1.33008	0.048264	0.874323	Up	2.03785	4.92504	16:59564419:59593852:1	Lonrf1
ENSRNOT00000083481	13.5	27	0	0	#NAME?	0.0396317	0.782461	Down	0.276964	3.29602e-10	4:33743366:33760716:-1	Asns
ENSRNOT00000083553	12.5	0	25	Inf	Inf	0.0477266	0.870396	Up	1.11259e-11	0.406743	3:161212184:161235720:1	Dnttip1
ENSRNOT00000083637	30	60	0	0	#NAME?	0.00267719	0.143182	Down	0.989902	1.7489e-07	3:132889661:133122691:-1	Tasp1
ENSRNOT00000083702	1165.5	233	2098	9.00429	3.17061	5.9582e-07	0.000134344	Up	0.801015	6.93535	1:40879747:40906581:1	Akap12
ENSRNOT00000083833	280.5	19	542	28.5263	4.83422	3.65122e-08	1.18767e-05	Up	0.0927583	2.60436	20:2667524:2678141:-1	C4a
ENSRNOT00000083848	61.5	106	17	0.160377	-2.64046	0.0399095	0.787161	Down	0.592897	0.0893805	9:10738222:10757720:-1	Uhrf1
ENSRNOT00000083876	6060.5	2782	9339	3.35694	1.74715	0.00357018	0.17578	Up	41.1529	132.68	3:164424515:164425910:1	Cebpb
ENSRNOT00000083900	178	48	308	6.41667	2.68182	0.00225228	0.125533	Up	1.2673	7.87818	8:59791687:59849490:-1	Nrg4
ENSRNOT00000083996	15	30	0	0	#NAME?	0.030231	0.683972	Down	0.839564	3.78695e-09	17:42258168:42276797:-1	LOC100911664
ENSRNOT00000084018	121.5	200	43	0.215	-2.21759	0.0225114	0.57776	Down	1.39757	0.28892	12:42480560:42492526:-1	Tbx3
ENSRNOT00000084155	408.5	105	712	6.78095	2.76149	0.000119984	0.0128688	Up	0.78328	5.08568	6:41799788:41842817:-1	Lpin1
ENSRNOT00000084170	21	42	0	0	#NAME?	0.0109364	0.36532	Down	1.23517	6.29809e-10	4:117767077:117767772:-1	LOC103690120
ENSRNOT00000084303	119	210	28	0.133333	-2.90689	0.00404374	0.190584	Down	11.3313	1.43729	17:44833924:44834305:-1	Hist1h2bd
ENSRNOT00000084366	15.5	0	31	Inf	Inf	0.0276437	0.646062	Up	2.51945e-16	0.648101	19:37020852:37021958:-1	AABR07072639.2
ENSRNOT00000084420	75	150	0	0	#NAME?	3.46124e-06	0.000624344	Down	3.89446	0.0105947	20:34895059:34907451:1	Asf1a
ENSRNOT00000084499	26	52	0	0	#NAME?	0.00501442	0.220612	Down	0.581231	0.000539075	6:3743084:3794501:-1	Thumpd2
ENSRNOT00000084514	18	0	36	Inf	Inf	0.0178441	0.499232	Up	0	2.70251	8:46694306:46694613:-1	AC133265.1
ENSRNOT00000084528	1841.5	2955	728	0.246362	-2.02115	0.000648421	0.0509365	Down	48.0877	11.3769	6:1570683:1583417:-1	Prkd3
ENSRNOT00000084538	73	145	1	0.00689655	-7.17991	2.17062e-05	0.00301185	Down	7.75321	0.0556711	17:44528125:44528511:1	LOC680322
ENSRNOT00000084617	22.5	0	45	Inf	Inf	0.00864717	0.319511	Up	0.00163001	0.806308	14:14951495:15008150:-1	Mrpl1
ENSRNOT00000084730	1832.5	141	3524	24.9929	4.64345	3.63652e-12	2.77523e-09	Up	0.851277	20.4962	12:23789675:23817865:1	Ywhag
ENSRNOT00000084865	194	334	54	0.161677	-2.62882	0.00208727	0.11901	Down	0.834517	0.130487	12:13810180:13904818:1	Tnrc18
ENSRNOT00000084870	712.5	415	1010	2.43373	1.28317	0.0389659	0.782461	Up	10.8099	25.2665	1:13165572:13175876:-1	Abracl
ENSRNOT00000084882	22.5	0	45	Inf	Inf	0.00864717	0.319511	Up	2.72134e-17	0.391944	1:80336527:80367328:-1	Mark4
ENSRNOT00000084884	50	96	4	0.0416667	-4.58496	0.00384383	0.185224	Down	0.559564	0.0239835	9:113579118:113598480:-1	Ralbp1
ENSRNOT00000085110	37	69	5	0.0724638	-3.7866	0.0260072	0.623985	Down	0.641735	0.0431756	X:128416809:128452969:1	Xiap
ENSRNOT00000085115	41.5	79	4	0.0506329	-4.30378	0.0104782	0.357846	Down	0.790674	0.0395436	10:56187679:56198449:1	Tp53
ENSRNOT00000085251	290	53	527	9.9434	3.31374	3.10764e-05	0.00411078	Up	0.390961	3.71591	5:166913735:166924136:-1	Spsb1
ENSRNOT00000085295	661	373	949	2.54424	1.34723	0.0321486	0.706414	Up	3.62268	8.85064	12:546760:576746:-1	N4bp2l1
ENSRNOT00000085300	49.5	99	0	0	#NAME?	0.000131277	0.0138553	Down	1.96618	1.88661e-05	16:56248331:56389759:1	Tusc3
ENSRNOT00000085304	26.5	52	1	0.0192308	-5.70044	0.0133584	0.413505	Down	0.335802	0.0074643	1:198302506:198316882:-1	Taok2
ENSRNOT00000085318	52.5	95	10	0.105263	-3.24793	0.0219552	0.568715	Down	0.357106	0.0343994	18:70548607:70727092:1	Myo5b
ENSRNOT00000085344	202.5	343	62	0.180758	-2.46787	0.00322193	0.163503	Down	1.26877	0.221283	10:86901007:86932154:-1	Top2a
ENSRNOT00000085381	777	1203	351	0.291771	-1.77709	0.00437258	0.201769	Down	79.6111	22.2813	17:44744591:44744902:-1	LOC102548682
ENSRNOT00000085435	227.5	339	116	0.342183	-1.54716	0.0485624	0.874323	Down	0.985307	0.324395	16:54040847:54137660:-1	Pcm1
ENSRNOT00000085585	121.5	234	9	0.0384615	-4.70044	2.79044e-05	0.00376652	Down	0.924288	0.0357612	8:112834707:112884077:-1	Acpp
ENSRNOT00000085588	17.5	35	0	0	#NAME?	0.0194418	0.522008	Down	0.225567	1.48106e-10	X:23243470:23246719:-1	AABR07037536.1
ENSRNOT00000085599	13.5	27	0	0	#NAME?	0.0396317	0.782461	Down	0.145791	0.00208259	2:57860883:57935352:-1	Slc1a3
ENSRNOT00000085601	449	175	723	4.13143	2.04664	0.00278311	0.14726	Up	3.04126	12.0335	18:70739492:70762134:1	Acaa2
ENSRNOT00000085635	40	79	1	0.0126582	-6.30378	0.00193355	0.113173	Down	0.558866	0.00774344	20:3556560:3574959:1	Ddr1
ENSRNOT00000085659	24.5	0	49	Inf	Inf	0.00633419	0.258076	Up	3.11424e-05	0.327475	16:67350539:67595225:1	Unc5d
ENSRNOT00000085674	27	52	2	0.0384615	-4.70044	0.0242021	0.598113	Down	0.492249	0.0179548	5:151181559:151199500:1	Fgr
ENSRNOT00000085714	236	397	75	0.188917	-2.40418	0.00270703	0.144297	Down	2.97637	0.542821	18:35683185:35817127:-1	Mcc
ENSRNOT00000085728	81.5	14	149	10.6429	3.41181	0.0043955	0.202356	Up	0.105272	1.07723	10:72156728:72188164:-1	Ggnbp2
ENSRNOT00000085767	111	21	201	9.57143	3.25873	0.00203985	0.117659	Up	0.297994	2.77178	15:23568555:23580395:-1	Cnih1
ENSRNOT00000085832	416	194	638	3.28866	1.7175	0.0123526	0.395324	Up	1.56421	4.92611	10:34524845:34537208:1	Mgat1
ENSRNOT00000085835	415.5	177	654	3.69492	1.88554	0.00631981	0.258076	Up	4.847	17.2178	7:129860114:129862474:1	Pim3
ENSRNOT00000085836	77	154	0	0	#NAME?	2.63947e-06	0.00048493	Down	2.4698	5.05776e-08	7:59532641:59547174:-1	Cnot2
ENSRNOT00000085945	263	438	88	0.200913	-2.31536	0.00287806	0.15028	Down	22.0002	4.22295	2:198417619:198418029:1	LOC684841
ENSRNOT00000086026	23.5	45	2	0.0444444	-4.49185	0.0381859	0.774729	Down	1.42452	0.0708142	20:3148665:3150421:1	RT1-N2
ENSRNOT00000086061	20	40	0	0	#NAME?	0.0128233	0.404515	Down	0.0993014	3.68649e-21	7:12259911:12275609:-1	Apc2
ENSRNOT00000086130	508.5	772	245	0.317358	-1.65582	0.0121793	0.391915	Down	2.16707	0.661023	17:1029048:1093873:-1	Ptch1
ENSRNOT00000086177	1082	448	1716	3.83036	1.93748	0.00141047	0.0880082	Up	5.77243	21.2341	14:88549947:88574203:1	LOC100911576
ENSRNOT00000086193	2150.5	1337	2964	2.2169	1.14855	0.0462081	0.86187	Up	19.102	40.6582	10:37049677:37055282:-1	LOC103689931
ENSRNOT00000086242	39	0	78	Inf	Inf	0.000652044	0.0509365	Up	4.19909e-11	0.28561	3:80362865:80412815:1	Lrp4
ENSRNOT00000086350	42.5	3	82	27.3333	4.77259	0.00570317	0.24026	Up	0.0213247	0.520373	13:35436532:35442222:-1	Inhbb
ENSRNOT00000086355	39	78	0	0	#NAME?	0.000652044	0.0509365	Down	1.35988	9.19481e-08	7:123043584:123055783:1	Tef
ENSRNOT00000086390	103.5	8	199	24.875	4.63662	9.08231e-05	0.0101814	Up	0.0414751	1.04421	4:163239849:163261958:-1	Olr1
ENSRNOT00000086491	1708	2425	991	0.40866	-1.29103	0.0263297	0.626921	Down	12.4478	4.88514	8:102140713:102159828:-1	RGD1309079
ENSRNOT00000086538	21	42	0	0	#NAME?	0.0109364	0.36532	Down	2.27468	1.01269e-07	17:44519860:44520240:-1	Hist1h2bh
ENSRNOT00000086548	633.5	147	1120	7.61905	2.92961	1.25897e-05	0.00186421	Up	0.803245	5.87185	6:43829945:43841651:1	Klf11
ENSRNOT00000086550	39.5	78	1	0.0128205	-6.2854	0.0020767	0.118767	Down	0.108996	0.00143922	7:117230321:117259791:-1	Plec
ENSRNOT00000086717	188.5	55	322	5.85455	2.54956	0.00296644	0.153282	Up	0.600042	3.39321	3:8968616:8981362:-1	Crat
ENSRNOT00000086939	67	113	21	0.185841	-2.42786	0.0481864	0.874323	Down	2.70775	0.475494	7:2781286:2786949:-1	Coq10a
ENSRNOT00000086991	286.5	120	453	3.775	1.91648	0.0105229	0.358139	Up	0.547967	1.98684	1:255186728:255254307:1	Hectd2
ENSRNOT00000086994	19	0	38	Inf	Inf	0.0150895	0.449558	Up	8.95662e-15	0.40551	14:45829446:45859908:-1	Pgm2
ENSRNOT00000086997	16.5	33	0	0	#NAME?	0.0231482	0.582878	Down	0.772494	0.00832237	6:136245027:136249594:1	LOC103692719
ENSRNOT00000087033	348	151	545	3.60927	1.85171	0.0096258	0.338644	Up	1.76203	6.10649	X:15098947:15102332:1	Rbm3
ENSRNOT00000087112	590.5	168	1013	6.02976	2.5921	0.000103649	0.0114894	Up	1.87909	10.8889	9:46997798:47035275:1	Il1r1
ENSRNOT00000087188	119	199	39	0.19598	-2.35122	0.0169409	0.486512	Down	0.678498	0.128341	18:56825396:56870801:-1	Arhgef37
ENSRNOT00000087230	31	62	0	0	#NAME?	0.00228727	0.126418	Down	0.58092	6.4281e-17	20:47596575:47686862:1	Scml4
ENSRNOT00000087274	24.5	48	1	0.0208333	-5.58496	0.0177171	0.499086	Down	0.44608	0.0117775	X:159165169:159172518:1	Fhl1
ENSRNOT00000087287	1627.5	188	3067	16.3138	4.02802	5.82232e-10	2.75063e-07	Up	2.58926	40.5292	2:235311727:235327952:1	Pla2g12a
ENSRNOT00000087386	5528	2781	8275	2.97555	1.57316	0.00803343	0.302466	Up	9.07418	25.9263	1:239398043:239474255:1	Tmem2
ENSRNOT00000087458	14	0	28	Inf	Inf	0.0361799	0.753286	Up	1.27259e-05	0.208397	9:65701612:65736852:-1	Trak2
ENSRNOT00000087588	3241.5	707	5776	8.16973	3.03029	8.34492e-07	0.000179978	Up	5.32011	41.7615	1:250691370:250727218:-1	Sgms1
ENSRNOT00000087602	264	409	119	0.290954	-1.78114	0.019197	0.522008	Down	3.216	0.89472	5:25725683:25728311:1	AABR07047262.1
ENSRNOT00000087619	181.5	0	363	Inf	Inf	2.61159e-11	1.61935e-08	Up	1.00581e-05	1.65213	4:29535852:29564768:1	NEWGENE_621351
ENSRNOT00000087660	13.5	0	27	Inf	Inf	0.0396317	0.782461	Up	2.10549e-05	0.20769	19:21400887:21492468:-1	Lonp2
ENSRNOT00000087661	18.5	0	37	Inf	Inf	0.0163977	0.477071	Up	1.71267e-08	0.988174	1:168945449:168965566:1	LOC103694857
ENSRNOT00000087665	230	0	460	Inf	Inf	4.66235e-13	4.40525e-10	Up	1.63003e-05	10.4402	11:17077179:17119582:-1	RGD1563888
ENSRNOT00000087670	18.5	37	0	0	#NAME?	0.0163977	0.477071	Down	1.76269	1.50663e-18	20:3823596:3824966:1	Rxrb
ENSRNOT00000087714	82.5	137	28	0.20438	-2.29068	0.0416909	0.808632	Down	1.57607	0.311243	2:216481459:216509675:-1	Rnpc3
ENSRNOT00000087737	109.5	44	175	3.97727	1.99178	0.04626	0.86187	Up	0.557201	2.10963	16:10596833:10603850:-1	Fam35a
ENSRNOT00000087922	12.5	0	25	Inf	Inf	0.0477266	0.870396	Up	0	0.377291	8:49077053:49097591:1	Ift46
ENSRNOT00000087928	188.5	59	318	5.38983	2.43024	0.00440817	0.202421	Up	0.915151	4.70174	1:198228387:198233215:-1	Aldoa
ENSRNOT00000087991	1838.5	1079	2598	2.40778	1.26771	0.0287244	0.665053	Up	13.1895	30.4873	14:22251499:22268222:1	Ugt2a1
ENSRNOT00000088048	44.5	5	84	16.8	4.07039	0.0111639	0.371047	Up	0.0289878	0.4783	19:10423501:10450186:-1	Adgrg1
ENSRNOT00000088123	574.5	110	1039	9.44545	3.23962	2.76706e-06	0.000503706	Up	0.885111	8.03111	1:69789110:69820976:1	Hiat1
ENSRNOT00000088273	47690	20542	74838	3.64317	1.86519	0.00968074	0.339974	Up	144.752	506.414	4:140886545:140915779:1	Edem1
ENSRNOT00000088280	114.5	184	45	0.244565	-2.03171	0.0391566	0.782461	Down	0.432037	0.101733	17:45078556:45097013:1	Zfp192
ENSRNOT00000088297	186.5	298	75	0.251678	-1.99035	0.0179354	0.500334	Down	2.1901	0.529798	19:44137444:44158624:-1	Tmem231
ENSRNOT00000088327	12.5	0	25	Inf	Inf	0.0477266	0.870396	Up	4.82275e-08	0.321387	2:188226110:188252551:-1	Dap3
ENSRNOT00000088424	470.5	218	723	3.31651	1.72967	0.00995638	0.347196	Up	1.70041	5.41407	7:120651881:120672359:-1	Csnk1e
ENSRNOT00000088493	28	0	56	Inf	Inf	0.00366611	0.17917	Up	3.41347e-07	0.426067	5:150084611:150167077:-1	Epb4.1
ENSRNOT00000088508	28.5	4	53	13.25	3.72792	0.0485054	0.874323	Up	0.068457	0.954119	14:7618022:7682374:1	Slc10a6
ENSRNOT00000088580	34	62	6	0.0967742	-3.36923	0.0493922	0.883716	Down	1.99165	0.1985	2:29598344:29646356:1	Mrps27
ENSRNOT00000088603	30	60	0	0	#NAME?	0.00267719	0.143182	Down	1.54113	0.00263607	12:11232964:11239521:-1	Bud31
ENSRNOT00000088624	914	538	1290	2.39777	1.26169	0.0366706	0.759519	Up	3.85425	8.87782	18:60496778:60718471:1	Nedd4l
ENSRNOT00000088712	912.5	495	1330	2.68687	1.42593	0.0187083	0.514598	Up	1.5062	3.88962	6:107633716:107658741:-1	Elmsan1
ENSRNOT00000088752	75.5	21	130	6.19048	2.63005	0.0261901	0.626845	Up	0.323733	1.88773	7:107585577:107616038:-1	Sla
ENSRNOT00000088802	23.5	0	47	Inf	Inf	0.00740039	0.284571	Up	0.000282584	0.795871	X:37329817:37341807:1	Pdha1
ENSRNOT00000088872	49.5	99	0	0	#NAME?	0.000131277	0.0138553	Down	0.794855	0.00197864	5:76386836:76419252:1	Ugcg
ENSRNOT00000088898	110.5	43	178	4.13953	2.04947	0.0400785	0.78971	Up	0.508996	2.03534	10:109707998:109716128:1	Gcgr
ENSRNOT00000089043	145	229	61	0.266376	-1.90847	0.034973	0.743766	Down	1.63716	0.418844	12:45037883:45116665:-1	Taok3
ENSRNOT00000089055	249	391	107	0.273657	-1.86956	0.0157427	0.464832	Down	19.6584	5.17438	17:43776050:43776460:-1	LOC684841
ENSRNOT00000089065	146.5	240	53	0.220833	-2.17897	0.0168203	0.485807	Down	1.39226	0.292832	3:64269817:64364101:-1	Zfp385b
ENSRNOT00000089073	2103	2927	1279	0.436966	-1.19441	0.0384255	0.777392	Down	19.3792	8.13614	1:248297656:248376750:-1	Gldc
ENSRNOT00000089118	260	137	383	2.79562	1.48317	0.0499539	0.890553	Up	1.49284	3.9896	10:1622573:1674701:1	AABR07028989.1
ENSRNOT00000089146	22.5	0	45	Inf	Inf	0.00864717	0.319511	Up	0.00238378	0.57769	10:84629744:84639111:-1	Snx11
ENSRNOT00000089177	17.5	0	35	Inf	Inf	0.0194418	0.522008	Up	1.21666e-05	0.264433	4:133037014:133131953:-1	Shq1
ENSRNOT00000089290	47.5	8	87	10.875	3.44294	0.0213499	0.555937	Up	0.0518093	0.561343	7:144307509:144322240:-1	Calcoco1
ENSRNOT00000089306	687.5	1153	222	0.192541	-2.37676	0.000241177	0.0228968	Down	15.4477	2.85746	20:5351605:5418011:1	RT1-A1
ENSRNOT00000089387	27	2	52	26	4.70044	0.0242021	0.598113	Up	0.140465	2.95279	6:138744049:138744480:-1	AABR07065651.5
ENSRNOT00000089417	226	409	43	0.105134	-3.24969	0.00011979	0.0128688	Down	2.29551	0.232936	20:3556975:3575780:1	Ddr1
ENSRNOT00000089470	441	0	882	Inf	Inf	1.47693e-18	4.88419e-15	Up	0.000184012	6.12031	9:93086012:93152691:1	Psmd1
ENSRNOT00000089544	44	0	88	Inf	Inf	0.000301465	0.0278217	Up	1.49046e-05	1.75647	7:140490079:140502441:-1	Prkag1
ENSRNOT00000089550	577.5	292	863	2.95548	1.56339	0.0153837	0.457099	Up	2.31628	6.57394	20:3377228:3386048:-1	Dhx16
ENSRNOT00000089594	32.5	65	0	0	#NAME?	0.00180615	0.107298	Down	0.855884	0.000754672	6:99381362:99400822:-1	Zbtb25
ENSRNOT00000089673	463.5	8	919	114.875	6.84392	2.47813e-14	3.51222e-11	Up	0.082253	8.93191	9:42871950:42884204:1	Arid5a
ENSRNOT00000089686	491.5	910	73	0.0802198	-3.6399	5.04161e-07	0.00011909	Down	2.08241	0.160468	8:57936650:57962708:1	Exph5
ENSRNOT00000089705	149	24	274	11.4167	3.51307	0.000288907	0.0267874	Up	0.416595	4.49997	3:3827503:3830952:-1	Sdccag3
ENSRNOT00000089736	178.5	302	55	0.182119	-2.45705	0.00465096	0.209262	Down	6.53656	1.14032	17:27496472:27523912:1	Ssr1
ENSRNOT00000089857	20.5	0	41	Inf	Inf	0.011838	0.385066	Up	0.00126718	0.323997	3:112303358:112320762:-1	Zfp106
ENSRNOT00000089870	24.5	49	0	0	#NAME?	0.00633419	0.258076	Down	0.941688	0.000136406	4:114820404:114823500:-1	NEWGENE_1562258
ENSRNOT00000089893	629	920	338	0.367391	-1.44461	0.0228736	0.581674	Down	4.2853	1.51024	3:159902441:159965003:1	Hnf4a
ENSRNOT00000089913	12.5	25	0	0	#NAME?	0.0477266	0.870396	Down	0.281761	0.000331607	13:56598979:56622782:1	F13b
ENSRNOT00000089935	233.5	0	467	Inf	Inf	3.56338e-13	3.67303e-10	Up	8.29922e-07	8.30715	3:150803390:150855228:-1	Pigu
ENSRNOT00000089950	128	37	219	5.91892	2.56533	0.00814241	0.305988	Up	0.80538	4.61947	1:64024240:64030175:-1	Tsen34
ENSRNOT00000090122	6893.5	3344	10443	3.12291	1.64289	0.00640011	0.260227	Up	26.6996	80.0644	4:176638629:176679815:-1	Gys2
ENSRNOT00000090129	5054	1425	8683	6.09333	2.60723	2.07698e-05	0.00296485	Up	15.9697	93.4461	1:85380095:85382607:1	Zfp36
ENSRNOT00000090133	27	2	52	26	4.70044	0.0242021	0.598113	Up	0.140465	2.95279	6:139718892:139719323:-1	AABR07065705.4
ENSRNOT00000090143	14	0	28	Inf	Inf	0.0361799	0.753286	Up	5.08638e-05	0.17681	1:201256910:201329171:1	Tacc2
ENSRNOT00000090207	78	156	0	0	#NAME?	2.30679e-06	0.000435917	Down	1.69157	0.00131674	10:1622573:1674701:1	AABR07028989.1
ENSRNOT00000090208	13.5	0	27	Inf	Inf	0.0396317	0.782461	Up	2.62985e-09	0.239342	7:122940826:122963299:-1	Rangap1
ENSRNOT00000090228	337.5	544	131	0.240809	-2.05404	0.00462374	0.20913	Down	5.75142	1.32505	15:34548295:34550860:-1	Cbln3
ENSRNOT00000090258	22.5	43	2	0.0465116	-4.42626	0.0434771	0.826314	Down	0.333694	0.0124169	8:79323485:79406219:1	Nedd4
ENSRNOT00000090477	510	741	279	0.376518	-1.40921	0.0315766	0.700831	Down	3.74586	1.35584	16:59077813:59245848:1	Dlc1
ENSRNOT00000090579	210.5	97	324	3.34021	1.73994	0.030816	0.691688	Up	0.795095	2.5534	5:25577593:25584278:-1	Pdp1
ENSRNOT00000090581	16	32	0	0	#NAME?	0.0252888	0.612675	Down	2.29501	1.50273e-14	3:19441604:19441888:1
ENSRNOT00000090726	612.5	886	339	0.382619	-1.38602	0.0293947	0.675057	Down	10.728	3.9383	16:23970743:23975061:-1	Nat1
ENSRNOT00000090727	1661	876	2446	2.79224	1.48142	0.0112755	0.372881	Up	4.32146	11.584	15:86243148:86457739:1	Lmo7
ENSRNOT00000090780	59.5	0	119	Inf	Inf	3.02797e-05	0.00403229	Up	3.80686e-07	0.847827	8:48472824:48481001:1	Mcam
ENSRNOT00000090844	12.5	0	25	Inf	Inf	0.0477266	0.870396	Up	2.47409e-06	0.20915	7:14529482:14574361:1	Cyp4f5
ENSRNOT00000090849	42.5	77	8	0.103896	-3.26679	0.0351199	0.745294	Down	2.496	0.237378	7:18559736:18577368:-1	2019-03-02
ENSRNOT00000090865	16259	9089	23429	2.57773	1.3661	0.0320594	0.705815	Up	110.747	274.146	19:15195565:15239638:1	Ces1d
ENSRNOT00000090918	336.5	491	182	0.370672	-1.43178	0.0441059	0.835065	Down	1.39596	0.49589	X:116751230:116792864:-1	Amot
ENSRNOT00000090923	235	358	112	0.312849	-1.67646	0.0317829	0.704565	Down	4.63175	1.39139	18:24717336:24745747:1	Lims2
ENSRNOT00000091015	21	0	42	Inf	Inf	0.0109364	0.36532	Up	4.27036e-10	0.183905	13:53148066:53224768:-1	Camsap2
ENSRNOT00000091095	594	267	921	3.44944	1.78636	0.00575064	0.240977	Up	2.33415	7.73722	4:44321883:44360405:1	Tes
ENSRNOT00000091116	19	0	38	Inf	Inf	0.0150895	0.449558	Up	0.000428374	0.223955	1:259641676:259674425:-1	Aldh18a1
ENSRNOT00000091176	155.5	256	55	0.214844	-2.21864	0.0132655	0.413078	Down	9.34344	1.9202	17:44756557:44758170:-1	Hist1h2bo
ENSRNOT00000091221	97	33	161	4.87879	2.28652	0.0305667	0.688428	Up	0.434291	2.03017	2:114423533:114444520:1	Slc2a2
ENSRNOT00000091249	642	270	1014	3.75556	1.90903	0.00294941	0.152799	Up	2.14742	7.74729	4:14039977:14241269:1	Cd36
ENSRNOT00000091368	223.5	334	113	0.338323	-1.56353	0.0473715	0.870396	Down	1.00835	0.326679	7:14222149:14302552:-1	Brd4
ENSRNOT00000091370	23.5	0	47	Inf	Inf	0.00740039	0.284571	Up	0.000605096	0.220062	17:5513930:5614435:1	Agtpbp1
ENSRNOT00000091377	21	42	0	0	#NAME?	0.0109364	0.36532	Down	0.436442	0.00433001	1:254531659:254574124:1	AC080157.1
ENSRNOT00000091389	103.5	41	166	4.04878	2.01749	0.048163	0.874323	Up	0.443072	1.71175	13:80755107:80775230:-1	Fmo2
ENSRNOT00000091419	160.5	65	256	3.93846	1.97763	0.0244182	0.60038	Up	0.56648	2.14137	3:148310134:148312791:-1	Bcl2l1
ENSRNOT00000091460	19	0	38	Inf	Inf	0.0150895	0.449558	Up	1.04684e-06	0.343351	12:41341457:41363092:1	Oas2
ENSRNOT00000091467	26.5	53	0	0	#NAME?	0.00463749	0.20913	Down	0.534772	0.0042906	X:53360839:53517142:1	Dmd
ENSRNOT00000091470	343	177	509	2.87571	1.52392	0.0318651	0.704565	Up	1.65856	4.5701	1:154377465:154457290:1	Picalm
ENSRNOT00000091561	257.5	80	435	5.4375	2.44294	0.00186354	0.110377	Up	0.539796	2.82185	17:77185053:77218061:1	Optn
ENSRNOT00000091680	21.5	43	0	0	#NAME?	0.0101092	0.347659	Down	0.646756	0.00372806	1:219440192:219443564:1	Ppp1ca
ENSRNOT00000091704	34.5	0	69	Inf	Inf	0.00131863	0.0832481	Up	0	1.04448	8:5686298:5698579:1	Mmp3
ENSRNOT00000091722	127	243	11	0.0452675	-4.46538	3.9507e-05	0.00496138	Down	0.94402	0.0416075	8:79489790:79593806:1	Prtg
ENSRNOT00000091731	706.5	292	1121	3.83904	1.94075	0.00222228	0.124561	Up	7.31853	26.9512	20:6351458:6357756:1	Cdkn1a
ENSRNOT00000091756	75	9	141	15.6667	3.96963	0.00196799	0.114178	Up	0.122886	1.95398	11:60054408:60066739:1	Abhd10
ENSRNOT00000091773	12.5	25	0	0	#NAME?	0.0477266	0.870396	Down	0.494901	1.5742e-20	8:26341732:26345754:-1	AC094212.1
ENSRNOT00000091834	27.5	1	54	54	5.75489	0.01159	0.380742	Up	0.0136141	0.562282	3:161813598:161819029:-1	Elmo2
ENSRNOT00000091923	3579.5	631	6528	10.3455	3.37093	7.13366e-08	2.17763e-05	Up	6.89868	68.5778	7:99142450:99181783:1	Cyp2b1
ENSRNOT00000091965	1348.5	677	2020	2.98375	1.57713	0.00768104	0.292994	Up	6.00684	17.2049	4:145377431:145390447:-1	Cidec
ENSRNOT00000092027	547	1087	7	0.00643974	-7.27878	4.43413e-16	1.25688e-12	Down	7.15616	0.0455578	18:1971506:2094852:1	Mib1
ENSRNOT00000092066	932.5	142	1723	12.1338	3.60096	5.06008e-08	1.56878e-05	Up	2.82628	32.8615	1:157573324:157659508:1	Rab30
ENSRNOT00000092086	34.5	68	1	0.0147059	-6.08746	0.00425331	0.198865	Down	0.72196	0.00598058	1:154377529:154447619:1	Picalm
ENSRNOT00000092133	61.5	108	15	0.138889	-2.848	0.0283249	0.659541	Down	1.73637	0.227319	1:89550738:89559960:-1	Scn1b
ENSRNOT00000092161	553.5	293	814	2.77816	1.47413	0.0228835	0.581674	Up	1.95996	5.23108	15:24254042:24334890:1	Fbxo34
ENSRNOT00000092170	1490.5	2420	561	0.231818	-2.10893	0.000430692	0.0374815	Down	18.8874	4.20242	1:275847064:275906686:-1	Gpam
ENSRNOT00000092257	91	13	169	13	3.70044	0.00153555	0.094213	Up	0.173528	2.24114	2:187774062:187786700:-1	Slc25a44
ENSRNOT00000092353	13.5	27	0	0	#NAME?	0.0396317	0.782461	Down	1.17468	4.0224e-16	16:81690613:81693000:-1	Lamp1
ENSRNOT00000092365	13	0	26	Inf	Inf	0.0434723	0.826314	Up	4.57795e-13	0.20501	2:209838869:209843588:1	Kcna2
ENSRNOT00000092594	45.5	89	2	0.0224719	-5.47573	0.00207702	0.118767	Down	3.1101	0.0562252	4:148139528:148153837:1	Fam21c
ENSRNOT00000092612	135	245	25	0.102041	-3.29278	0.000866692	0.0627624	Down	3.21482	0.315041	2:187774062:187786704:-1	Slc25a44
ENSRNOT00000092644	14.5	29	0	0	#NAME?	0.0330694	0.717902	Down	0.712207	1.03432e-10	16:81665552:81685174:1	Grtp1
ENSRNOT00000092693	132	254	10	0.0393701	-4.66676	1.75679e-05	0.0025631	Down	3.05359	0.119078	17:76198959:76250537:-1	Upf2

## Sheet: 6h vs 0h
id	baseMean	baseMean_control_0h	baseMean_case_6h	foldChange	log2FoldChange	pval	padj	up_down	expression_0h	expression_6h	chromosome_position	gene_symbol
ENSRNOT00000000203	267.736	108.517	426.955	3.93444	1.97616	0.0452351	0.85445	Up	0.668103	2.60237	7:119554354:119568776:1	Csf2rb
ENSRNOT00000000256	30.3546	0	60.7092	Inf	Inf	0.00536624	0.274275	Up	0	1.44981	10:69423086:69424979:1	Ccl7
ENSRNOT00000000628	422.437	96.4598	748.415	7.75883	2.95584	0.00223394	0.156476	Up	1.07045	8.17584	20:6356423:6358864:1	Cdkn1a
ENSRNOT00000000718	2359.2	941.488	3776.91	4.01164	2.00419	0.0191053	0.564045	Up	7.79758	30.9317	20:45143453:45260119:-1	Slc16a10
ENSRNOT00000000784	1341.24	2128.15	554.345	0.260483	-1.94074	0.0242344	0.646689	Down	8.59983	2.21574	20:20638579:20713128:-1	Rhobtb1
ENSRNOT00000000792	15.4261	0	30.8522	Inf	Inf	0.0378676	0.796703	Up	0	0.193203	20:22454463:22459025:-1	Egr2
ENSRNOT00000001035	225.681	368.758	82.6043	0.224007	-2.15838	0.0347131	0.773685	Down	4.19171	0.924504	20:3167079:3170945:1	RT1-N3
ENSRNOT00000001079	3184.76	4921.46	1448.06	0.294234	-1.76496	0.0378081	0.796703	Down	121.452	35.3306	20:40769586:40773349:1	Fabp7
ENSRNOT00000001108	61.785	121.58	1.99047	0.0163717	-5.93265	0.00127036	0.110416	Down	2.13086	0.0277721	20:4861353:4863198:-1	Ltb
ENSRNOT00000001210	240.229	79.3784	401.079	5.05274	2.33707	0.0217133	0.60676	Up	0.503503	2.52578	12:6929978:6956984:-1	Uspl1
ENSRNOT00000001234	185.218	22.1054	348.331	15.7578	3.97799	0.000601529	0.0658641	Up	0.069978	1.09324	12:8085525:8108972:1	Slc7a1
ENSRNOT00000001243	560.013	982.685	137.342	0.139762	-2.83895	0.0024161	0.165457	Down	8.37815	1.15899	12:8725517:8741951:1	Slc46a3
ENSRNOT00000001282	13.5647	27.1293	0	0	#NAME?	0.0495447	0.890434	Down	0.281994	0	12:10577068:10582208:1	Rnf6
ENSRNOT00000001292	458.214	713.401	203.027	0.284591	-1.81304	0.047924	0.877371	Down	4.59718	1.29123	12:36512393:36555694:-1	Aacs
ENSRNOT00000001301	15.4261	0	30.8522	Inf	Inf	0.0378676	0.796703	Up	9.88885e-12	0.422054	12:36734372:36760752:1	Scarb1
ENSRNOT00000001360	5547.97	10158.4	937.509	0.0922888	-3.4377	0.000181555	0.0294135	Down	124.884	11.3915	15:58654913:58658153:1	Tsc22d1
ENSRNOT00000001379	607.741	241.15	974.333	4.04037	2.01449	0.0251986	0.656415	Up	4.35105	17.4077	12:12738820:12748345:1	Aimp2
ENSRNOT00000001583	766.041	253.207	1278.87	5.0507	2.33648	0.00912679	0.375477	Up	1.18327	5.90246	20:10844266:10869821:1	Rrp1b
ENSRNOT00000001605	1274.3	397.897	2150.7	5.40516	2.43434	0.00557195	0.281108	Up	2.09577	11.1927	20:11228844:11243205:1	Pwp2
ENSRNOT00000001636	3761.9	1237.9	6285.89	5.07786	2.34422	0.00697607	0.320321	Up	13.2675	66.5891	20:11700089:11721838:-1	Ube2g2
ENSRNOT00000001874	132.518	241.15	23.8856	0.0990488	-3.33572	0.00588747	0.291854	Down	2.51966	0.243658	12:22122953:22125091:1	Irs3
ENSRNOT00000001916	1132.8	47.2251	2218.37	46.9744	5.5538	5.83945e-08	4.65474e-05	Up	0.314268	14.7173	12:22641104:22651482:1	Serpine1
ENSRNOT00000001990	71.7093	11.0527	132.366	11.9759	3.58206	0.0152649	0.507554	Up	0.150585	1.83316	1:258210344:258252448:1	LOC100361492
ENSRNOT00000002121	496.195	119.57	872.819	7.29965	2.86783	0.0024674	0.167246	Up	1.86368	13.4141	11:16873646:16889201:-1	Btg3
ENSRNOT00000002223	62.7803	121.58	3.98093	0.0327434	-4.93265	0.00352725	0.208451	Down	0.946184	0.0276027	11:46208075:46369577:-1	Abi3bp
ENSRNOT00000002247	3801.4	1487.09	6115.71	4.11253	2.04003	0.0176402	0.539164	Up	8.4553	34.3838	11:36075709:36092495:1	Ets2
ENSRNOT00000002255	1953.84	3181.17	726.52	0.228382	-2.13048	0.0132445	0.465549	Down	31.0748	7.01654	11:44192940:44237100:1	St3gal6
ENSRNOT00000002259	209.767	370.768	48.7664	0.131528	-2.92656	0.00625306	0.299545	Down	5.12643	0.663073	11:35568182:35585390:1	Kcnj15
ENSRNOT00000002309	14.5695	29.1389	0	0	#NAME?	0.0426003	0.835329	Down	0.219189	0.000129127	5:79235539:79317206:-1	Dfnb31
ENSRNOT00000002396	38.3404	5.02395	71.6568	14.263	3.83421	0.0405416	0.817785	Up	0.0433375	0.622991	11:71606239:71619167:-1	Tm4sf19
ENSRNOT00000002411	299.598	111.532	487.664	4.37243	2.12843	0.0291416	0.705631	Up	0.541416	2.3472	11:71348727:71387992:-1	Tnk2
ENSRNOT00000002579	2022.96	972.637	3073.28	3.15974	1.65981	0.0499748	0.892381	Up	19.0066	59.3525	11:86890585:86898818:1	Ranbp1
ENSRNOT00000002640	1001.2	1778.48	223.927	0.12591	-2.98954	0.000985299	0.0935002	Down	11.0739	1.37947	11:77815181:77830416:1	Cldn1
ENSRNOT00000002728	2534.93	3887.53	1182.34	0.304135	-1.71721	0.0427138	0.835329	Down	49.9792	15.0256	14:22806132:22825444:1	Ugt2b10
ENSRNOT00000002759	115.509	13.0623	217.956	16.6859	4.06056	0.00194868	0.146082	Up	0.0463348	0.763504	11:61321459:61417842:1	Sidt1
ENSRNOT00000002771	219.643	354.691	84.5948	0.238503	-2.06792	0.0433764	0.841473	Down	5.1739	1.22528	11:31770165:31772984:-1	Dnajc28
ENSRNOT00000002936	188.166	14.0671	362.265	25.7527	4.68665	0.000100781	0.0200836	Up	0.0959776	2.41816	14:10343282:10395047:-1	Gpat3
ENSRNOT00000002982	864.849	1358.48	371.222	0.273263	-1.87164	0.0325023	0.748241	Down	10.8318	2.92821	14:46050750:46054022:-1	LOC498368
ENSRNOT00000003001	394.051	614.931	173.171	0.281609	-1.82823	0.0498103	0.891841	Down	1.62827	0.452136	14:16622760:16903242:-1	Shroom3
ENSRNOT00000003020	2693.76	4114.62	1272.9	0.309361	-1.69264	0.0456446	0.85893	Down	43.7587	13.3798	14:16976356:16979760:-1	Stbd1
ENSRNOT00000003060	37.6557	70.3353	4.97616	0.0707492	-3.82114	0.0422531	0.835329	Down	0.942578	0.0699339	11:68142693:68197772:-1	Hspbap1
ENSRNOT00000003158	244.798	98.4694	391.126	3.97206	1.98989	0.0469958	0.872003	Up	1.30422	5.11283	14:11256268:11274578:1	Hnrnpd
ENSRNOT00000003180	25.3784	0	50.7569	Inf	Inf	0.0097791	0.386663	Up	3.89728e-26	3.43561	1:89258553:89258935:-1	LOC100361079
ENSRNOT00000003251	68.6711	0	137.342	Inf	Inf	8.11154e-05	0.0173814	Up	0	1.67561	10:76164046:76166251:-1	Akap1
ENSRNOT00000003313	160.955	47.2251	274.684	5.81648	2.54015	0.0223047	0.614782	Up	0.224438	1.29354	13:105039853:105141030:-1	Tgfb2
ENSRNOT00000003320	399.557	98.4694	700.644	7.11534	2.83093	0.00343233	0.204789	Up	0.558339	3.9292	13:68949665:69101588:1	Fam129a
ENSRNOT00000003359	799.735	327.562	1271.91	3.88296	1.95716	0.0264367	0.669376	Up	3.87528	14.8915	13:105155441:105179095:-1	Rrp15
ENSRNOT00000003391	2664.74	4081.46	1248.02	0.305779	-1.70944	0.0436353	0.842116	Down	84.6497	25.5917	13:37266312:37287458:-1	Insig2
ENSRNOT00000003452	13.9333	0	27.8665	Inf	Inf	0.0473566	0.873896	Up	0	0.0983417	13:77829382:77896697:-1	Tnn
ENSRNOT00000003472	112.562	21.1006	204.023	9.66905	3.27337	0.00951585	0.381553	Up	0.0893979	0.84756	14:17969219:18076907:-1	Parm1
ENSRNOT00000003558	183.945	68.3257	299.565	4.38437	2.13237	0.0446894	0.850085	Up	0.484093	2.10641	13:68707776:68722469:1	Ivns1abp
ENSRNOT00000003686	162.462	50.2395	274.684	5.4675	2.45088	0.0265573	0.669376	Up	0.414749	2.26284	14:18231860:18272484:1	Btc
ENSRNOT00000003745	30.857	1.00479	60.7092	60.4198	5.91695	0.0137963	0.477315	Up	0.0261497	1.15345	14:18731378:18733391:-1	Cxcl2
ENSRNOT00000003778	3074.4	236.126	5912.68	25.0404	4.64619	1.30628e-06	0.000619799	Up	5.2393	129.744	14:18743685:18745457:-1	Cxcl1
ENSRNOT00000003817	188.7	335.6	41.7998	0.124552	-3.00517	0.00615548	0.296178	Down	2.01476	0.246415	13:82552550:82566549:1	Slc19a2
ENSRNOT00000003879	338.51	550.625	126.395	0.229547	-2.12314	0.0268663	0.669376	Down	5.6904	1.28945	14:19141755:19159923:-1	Afp
ENSRNOT00000003932	3811.56	1321.3	6301.81	4.76941	2.25381	0.00926909	0.376968	Up	10.7427	50.6497	13:82737159:82758004:-1	Atp1b1
ENSRNOT00000003940	1070.33	95.4551	2045.2	21.4258	4.42128	4.98929e-06	0.00191205	Up	2.26765	48.148	10:106975178:106976040:-1	Socs3
ENSRNOT00000003992	2379.59	833.976	3925.2	4.70661	2.23469	0.00954202	0.381834	Up	5.17478	24.0676	10:61746082:61757514:1	Tsr1
ENSRNOT00000004026	884.344	226.078	1542.61	6.82336	2.77048	0.00219118	0.155949	Up	0.741175	4.99158	10:10644572:10690223:1	Ppl
ENSRNOT00000004070	17006.6	7440.47	26572.7	3.57138	1.83648	0.0435865	0.842116	Up	75.9045	267.948	6:132762280:132768379:1	Slc25a47
ENSRNOT00000004163	653.809	1033.93	273.689	0.264708	-1.91753	0.0316024	0.732589	Down	11.895	3.11251	10:91187593:91196572:1	Acbd4
ENSRNOT00000004187	56.7283	0	113.457	Inf	Inf	0.000271446	0.0383644	Up	0.00137499	2.16129	X:9436707:9467884:1	Cask
ENSRNOT00000004256	1626.67	2711.93	541.407	0.199639	-2.32453	0.00745425	0.333068	Down	13.8695	2.73478	10:103395511:103417358:1	Gprc5c
ENSRNOT00000004305	2172.03	4066.39	277.67	0.0682842	-3.8723	2.8449e-05	0.00736274	Down	44.1022	2.97756	X:13114569:13116743:-1	Mid1ip1
ENSRNOT00000004359	157.499	262.25	52.7473	0.201134	-2.31377	0.0365119	0.784906	Down	10.6436	2.13255	10:35737664:35739625:-1	Ltc4s
ENSRNOT00000004408	4167.27	675.219	7659.31	11.3434	3.50379	0.000126231	0.0232617	Up	5.41441	60.7416	13:50913180:50916982:-1	Btg2
ENSRNOT00000004602	255.451	455.17	55.733	0.122444	-3.0298	0.00353554	0.208451	Down	3.48888	0.425736	13:51042248:51076165:-1	Adora1
ENSRNOT00000004614	1064.95	430.05	1699.86	3.9527	1.98284	0.0226382	0.620542	Up	4.6037	17.9838	19:23936522:23946900:-1	Zfp330
ENSRNOT00000004713	73.2022	11.0527	135.352	12.246	3.61424	0.013895	0.479896	Up	0.0419533	0.486357	13:89622632:89634419:1	Adamts4
ENSRNOT00000004753	9689.28	19083	295.584	0.0154894	-6.01257	1.42859e-08	1.42344e-05	Down	91.9895	1.40812	10:46570996:46582854:-1	Srebf1
ENSRNOT00000004842	1096.4	136.651	2056.15	15.0467	3.91137	3.37468e-05	0.00840632	Up	2.91881	43.392	10:12995904:12997930:-1	Tnfrsf12a
ENSRNOT00000004885	395.691	750.578	40.8045	0.0543642	-4.2012	5.03733e-05	0.0116794	Down	12.63	0.680185	10:34956052:34961349:-1	Hnrnpab
ENSRNOT00000004972	229.188	373.782	84.5948	0.226321	-2.14356	0.0353705	0.775529	Down	1.87049	0.418525	X:71299966:71313513:-1	Zmym3
ENSRNOT00000004999	1566.14	2435.61	696.663	0.286032	-1.80575	0.034473	0.771018	Down	19.4104	5.48741	10:10967658:10989936:1	Cdip1
ENSRNOT00000005005	4197.5	6405.54	1989.47	0.310586	-1.68693	0.0476482	0.875147	Down	63.7569	19.578	13:93684437:93716227:1	Kmo
ENSRNOT00000005085	420.491	1.00479	839.976	835.972	9.70731	6.6648e-11	1.32816e-07	Up	0.0156315	9.03503	13:109817895:109849632:-1	Atf3
ENSRNOT00000005251	44.2974	2.00958	86.5853	43.0862	5.42916	0.00671755	0.316278	Up	0.0362926	1.28466	13:61066153:61070599:-1	Rgs1
ENSRNOT00000005296	24.8808	0	49.7616	Inf	Inf	0.010404	0.404152	Up	2.4883e-05	0.58276	13:73671412:73704480:-1	Tor1aip1
ENSRNOT00000005478	131.49	25.1198	237.861	9.46907	3.24322	0.00726349	0.326951	Up	0.214762	1.99771	10:17261541:17291876:1	Sh3pxd2b
ENSRNOT00000005687	153.044	267.274	38.8141	0.145222	-2.78367	0.0143442	0.489028	Down	3.42085	0.489445	10:109107450:109187115:1	Baiap2
ENSRNOT00000005726	235.224	73.3497	397.098	5.41377	2.43663	0.0175555	0.538471	Up	0.835408	4.46233	13:74252405:74276964:-1	Tor3a
ENSRNOT00000005746	521.458	95.4551	947.462	9.92574	3.31117	0.000579754	0.0641853	Up	1.11722	11.0102	7:23544215:23594133:-1	Timp3
ENSRNOT00000005753	655.202	71.3401	1239.06	17.3684	4.11839	2.76619e-05	0.00725325	Up	0.487076	8.38034	6:132735883:132747828:-1	Slc25a29
ENSRNOT00000005794	57.273	114.546	0	0	#NAME?	0.000250684	0.0362362	Down	6.19601	0.000340679	7:65005791:65008823:1	LOC100911956
ENSRNOT00000005829	3315.41	6130.22	500.602	0.0816613	-3.6142	7.8184e-05	0.0169353	Down	66.3203	5.34914	7:67341080:67345308:-1	Avpr1a
ENSRNOT00000005863	7300.29	1622.74	12977.8	7.9975	2.99955	0.000983796	0.0935002	Up	10.8217	85.5556	6:41799749:41870046:-1	Lpin1
ENSRNOT00000005894	60.7325	109.522	11.9428	0.109045	-3.19701	0.0363687	0.784367	Down	1.99301	0.207985	14:64686793:64739694:1	Adgra3
ENSRNOT00000005901	2301.65	3593.13	1010.16	0.281137	-1.83066	0.0313509	0.732428	Down	42.4449	11.7947	3:170354141:170362513:1	Fam210b
ENSRNOT00000006006	18.4118	0	36.8236	Inf	Inf	0.0245981	0.646689	Up	0.00219337	1.78539	10:37130499:37130921:-1	Trappc2b
ENSRNOT00000006071	342.642	59.2826	626.001	10.5596	3.40049	0.000785588	0.0802113	Up	0.446501	4.64474	14:63095720:63187009:1	Ppargc1a
ENSRNOT00000006128	1564.65	657.133	2472.16	3.76204	1.91151	0.0257017	0.661735	Up	7.53068	27.9972	6:132771021:132797675:-1	Wars
ENSRNOT00000006143	40.1916	80.3832	0	0	#NAME?	0.00165699	0.130618	Down	0.69233	0.000103297	6:115576576:115616766:-1	Sel1l
ENSRNOT00000006144	41.3022	0	82.6043	Inf	Inf	0.00148466	0.122765	Up	0	0.524708	6:144069077:144123596:-1	Wdr60
ENSRNOT00000006200	1672.27	476.27	2868.26	6.02234	2.59032	0.00314923	0.19223	Up	2.68003	15.9604	3:142748674:142752325:-1	Thbd
ENSRNOT00000006217	160.561	278.327	42.795	0.153758	-2.70127	0.0158727	0.514326	Down	2.69157	0.407805	10:98706960:98823287:1	Map2k6
ENSRNOT00000006284	256.332	431.055	81.6091	0.189324	-2.40107	0.0174092	0.537043	Down	4.81983	0.903641	6:94824112:94834908:-1	L3hypdh
ENSRNOT00000006345	43.8141	5.02395	82.6043	16.4421	4.03932	0.0255055	0.659239	Up	0.0203975	0.366329	19:37852833:37866355:1	Nrn1l
ENSRNOT00000006408	1929.53	894.263	2964.8	3.31535	1.72916	0.0416656	0.829223	Up	4.76626	15.6257	3:122114754:122152477:1	Sirpa
ENSRNOT00000006542	3252.74	5299.26	1206.22	0.227621	-2.1353	0.0130777	0.4629	Down	42.0763	9.46442	14:84335597:84355528:-1	Sec14l2
ENSRNOT00000006720	130.419	9.04311	251.794	27.8437	4.79928	0.000301066	0.0399976	Up	0.140165	3.84206	3:4861753:4866833:-1	Med22
ENSRNOT00000006824	3084.39	1393.64	4775.13	3.42636	1.77668	0.0365599	0.785092	Up	7.15274	24.2295	6:1516804:1534488:-1	Cebpz
ENSRNOT00000006954	13.5647	27.1293	0	0	#NAME?	0.0495447	0.890434	Down	1.94859	0.000206737	3:18315320:18315610:1	AABR07051626.2
ENSRNOT00000007002	963.059	140.671	1785.45	12.6924	3.66589	9.2747e-05	0.0192527	Up	0.749303	9.37365	14:104581190:104612597:-1	Slc1a4
ENSRNOT00000007077	65.7284	9.04311	122.414	13.5367	3.7588	0.0144539	0.489028	Up	0.0842922	1.18385	3:92288818:92290919:-1	Fjx1
ENSRNOT00000007169	837.644	346.653	1328.64	3.83276	1.93838	0.0274086	0.67565	Up	2.48884	9.41953	6:42656616:42745098:1	Nol10
ENSRNOT00000007259	4950.11	2263.79	7636.42	3.37329	1.75416	0.0407034	0.817785	Up	26.4523	88.21	6:42854888:42858759:1	Odc1
ENSRNOT00000007367	2812.08	639.046	4985.12	7.80087	2.96364	0.00084233	0.0839297	Up	11.0801	85.4805	X:15098904:15102340:1	Rbm3
ENSRNOT00000007398	4751.64	1862.88	7640.4	4.10139	2.03611	0.0184362	0.554142	Up	6.15673	24.9533	7:118741110:118792625:-1	Myh9l1
ENSRNOT00000007427	467.749	206.987	728.51	3.5196	1.81541	0.0472061	0.873896	Up	2.32438	8.07616	4:165606819:165630118:-1	Ybx3
ENSRNOT00000007548	565.066	998.761	131.371	0.131534	-2.9265	0.00182354	0.139232	Down	7.33211	0.956894	7:14486638:14515212:1	Cyp4f39
ENSRNOT00000007621	2331.96	1073.12	3590.8	3.34614	1.7425	0.0399185	0.816312	Up	23.71	78.4492	10:37535871:37554664:-1	LOC103694903
ENSRNOT00000007638	574.21	933.45	214.97	0.230297	-2.11844	0.0195554	0.571407	Down	3.97529	0.905454	6:7961413:7980708:1	Abcg8
ENSRNOT00000007698	1447.65	645.075	2250.22	3.48831	1.80253	0.0351329	0.774418	Up	10.6911	36.8366	4:97782512:97784842:-1	Gadd45a
ENSRNOT00000007747	2651.3	941.488	4361.11	4.63215	2.21168	0.0102485	0.399671	Up	16.2657	74.4537	7:60335969:60341264:-1	Lyz2
ENSRNOT00000007789	11586.3	2583.32	20589.4	7.97014	2.9946	0.00128627	0.110964	Up	49.4913	389.885	8:52925175:52937972:-1	Nnmt
ENSRNOT00000007824	1093.16	501.39	1684.93	3.36051	1.74868	0.0425849	0.835329	Up	6.8166	22.6326	14:100364190:100372760:-1	Pno1
ENSRNOT00000007879	3369.68	5927.26	812.11	0.137013	-2.86762	0.00120329	0.106363	Down	167.126	22.6256	13:112004140:112005052:-1	G0s2
ENSRNOT00000007949	1856.68	538.567	3174.79	5.89488	2.55946	0.00342957	0.204789	Up	5.42521	31.6217	3:1452644:1468614:1	Il1rn
ENSRNOT00000008161	1206.14	505.409	1906.87	3.77291	1.91568	0.0265448	0.669376	Up	2.165	8.08233	3:1478525:1514934:1	Psd4
ENSRNOT00000008212	24.3832	0	48.7664	Inf	Inf	0.0110744	0.418769	Up	2.33243e-05	1.26784	4:109467272:109470510:1	Reg3b
ENSRNOT00000008317	2532.83	828.952	4236.71	5.11092	2.35358	0.006567	0.311588	Up	1.93211	9.75595	7:29296963:29378080:-1	Utp20
ENSRNOT00000008410	3467.02	655.123	6278.92	9.58434	3.26068	0.000296148	0.0398095	Up	9.02401	85.5092	14:77402953:77492910:-1	Stx18
ENSRNOT00000008416	403.788	674.214	133.361	0.197802	-2.33787	0.0135146	0.470839	Down	5.12936	1.00577	6:99356509:99361909:1	Akap5
ENSRNOT00000008528	120.47	219.044	21.8951	0.0999575	-3.32254	0.00745409	0.333068	Down	0.498407	0.0484047	3:111699087:111759714:1	Mga
ENSRNOT00000008613	63.6949	0	127.39	Inf	Inf	0.000132617	0.0233875	Up	0	0.752676	7:29435444:29477947:1	Slc5a8
ENSRNOT00000008614	633.081	1070.1	196.061	0.183217	-2.44837	0.00724566	0.326951	Down	4.21742	0.762358	8:48094673:48157305:1	Pvrl1
ENSRNOT00000008705	359.279	0	718.558	Inf	Inf	4.47999e-11	1.11596e-07	Up	0.000212102	6.1235	X:68627329:68635593:1	Yipf6
ENSRNOT00000008725	913.042	400.911	1425.17	3.55484	1.82978	0.035813	0.780834	Up	5.29519	18.6177	5:28333915:28350358:-1	Otud6b
ENSRNOT00000008737	5547.99	8489.47	2606.51	0.307029	-1.70355	0.0473125	0.873896	Down	61.3368	18.6172	4:161748993:161757447:-1	Fkbp4
ENSRNOT00000008772	156.912	34.1629	279.66	8.18609	3.03318	0.00801659	0.351882	Up	0.379417	3.07573	8:132996649:133002201:-1	Ccr1
ENSRNOT00000008803	59.2826	118.565	0	0	#NAME?	0.000203244	0.0309179	Down	1.01159	0	6:56625650:56689238:1	Meox2
ENSRNOT00000008909	1911.24	2907.86	914.619	0.314533	-1.66872	0.0489552	0.890434	Down	29.8065	9.26556	7:3216497:3224201:1	Mmp19
ENSRNOT00000008962	225.758	384.835	66.6806	0.173271	-2.5289	0.0147733	0.495626	Down	3.14866	0.540562	4:122781095:122798353:1	Hdac11
ENSRNOT00000008989	825.886	1431.83	219.946	0.153613	-2.70263	0.00283237	0.182076	Down	4.89972	0.744397	15:8890578:9086282:-1	Thrb
ENSRNOT00000009061	455.324	733.497	177.151	0.241516	-2.04981	0.0266089	0.669376	Down	23.1447	5.52025	5:137371874:137372524:-1	Tmem125
ENSRNOT00000009101	73.6759	6.02874	141.323	23.4416	4.551	0.00346663	0.206218	Up	0.0710389	1.60906	14:77712240:77716059:1	Msx1
ENSRNOT00000009113	2879.4	1190.68	4568.12	3.83658	1.93982	0.0230819	0.628858	Up	13.7284	52.0806	2:182040318:182056673:1	Plrg1
ENSRNOT00000009132	390.269	133.637	646.901	4.84073	2.27523	0.0163941	0.521622	Up	0.539652	2.58514	4:14318274:14490446:-1	Sema3c
ENSRNOT00000009448	120.973	11.0527	230.894	20.8903	4.38476	0.000894214	0.0881251	Up	0.261573	5.6284	10:69412017:69413870:1	Ccl2
ENSRNOT00000009482	1280.91	532.539	2029.28	3.81058	1.93001	0.0251963	0.656415	Up	6.77273	25.5134	5:9430728:9432343:-1	Rrs1
ENSRNOT00000009513	58.7761	12.0575	105.495	8.74931	3.12917	0.0421514	0.835329	Up	0.119209	1.01918	6:105364668:105399500:1	Ttc9
ENSRNOT00000009564	2505.21	672.205	4338.22	6.45372	2.69013	0.00216906	0.154928	Up	7.25357	46.2473	3:122803772:122808558:1	Nop56
ENSRNOT00000009573	105.059	13.0623	197.056	15.0859	3.91513	0.00337104	0.202344	Up	0.0670849	1.02477	10:31813814:31848379:1	Havcr1
ENSRNOT00000009683	592.611	1140.44	44.7855	0.0392705	-4.67041	4.61862e-06	0.0018047	Down	21.0973	0.827481	5:151776004:151779319:1	Nr0b2
ENSRNOT00000009778	681.154	296.413	1065.89	3.59598	1.84638	0.0374892	0.796651	Up	2.27276	8.07946	10:94136995:94147556:-1	Cyb561
ENSRNOT00000009908	110.49	4.01916	216.961	53.9816	5.7544	0.000113161	0.0218897	Up	0.13794	7.21706	5:3955227:3956572:1	Msc
ENSRNOT00000009910	595.182	948.522	241.842	0.254967	-1.97162	0.0284912	0.694098	Down	9.42703	2.37184	7:30003429:30162056:-1	Nr1h4
ENSRNOT00000010030	217.841	80.3832	355.298	4.42005	2.14406	0.0370495	0.791343	Up	0.866607	3.76651	8:22446661:22454439:1	Qtrt1
ENSRNOT00000010056	1413.74	630.003	2197.47	3.48804	1.80241	0.0352619	0.774752	Up	2.51301	8.65848	5:105230580:105279731:1	Acer2
ENSRNOT00000010073	1639.7	430.05	2849.35	6.62563	2.72806	0.00199346	0.147379	Up	2.89532	18.9417	5:39251337:39257512:1	Ndufaf4
ENSRNOT00000010079	310.689	37.1772	584.202	15.714	3.97398	0.000171139	0.028467	Up	0.370597	5.73394	4:33743364:33761163:-1	Asns
ENSRNOT00000010238	125.068	244.164	5.9714	0.0244565	-5.35364	0.000123677	0.0230339	Down	1.34022	0.0312214	4:151375572:151390263:-1	Lrtm2
ENSRNOT00000010242	360.711	614.931	106.49	0.173174	-2.52971	0.00887545	0.371004	Down	3.88206	0.664939	13:48745860:48766283:1	Slc45a3
ENSRNOT00000010316	863.385	1364.5	362.265	0.265492	-1.91326	0.0290684	0.705589	Down	5.17709	1.35813	7:35472102:35543759:1	Tmcc3
ENSRNOT00000010333	121.905	206.987	36.8236	0.177903	-2.49084	0.0361462	0.784335	Down	0.765401	0.135641	5:79055521:79170765:1	Col27a1
ENSRNOT00000010377	69.8329	139.666	0	0	#NAME?	7.06838e-05	0.015479	Down	1.60524	3.43524e-17	4:78069978:78075398:-1	Zfp467
ENSRNOT00000010381	752.698	1423.79	81.6091	0.0573183	-4.12486	2.24218e-05	0.00603814	Down	14.0469	0.791	3:110306067:110324084:-1	Bmf
ENSRNOT00000010409	5907.49	9268.18	2546.8	0.27479	-1.8636	0.0311978	0.730708	Down	172.552	46.8689	8:85259982:85285983:1	Elovl5
ENSRNOT00000010454	83025.1	21727.6	144323	6.64237	2.7317	0.0118299	0.435761	Up	437.856	2874.86	5:79179417:79182820:1	Orm1
ENSRNOT00000010586	80.719	22.1054	139.333	6.30311	2.65606	0.0495976	0.890434	Up	0.340666	2.12207	6:26797126:26809129:1	Cgref1
ENSRNOT00000010619	190.85	55.2635	326.436	5.90691	2.5624	0.0169073	0.528747	Up	1.0825	6.27256	3:72226613:72230084:1	Timm10
ENSRNOT00000010620	65.2164	6.02874	124.404	20.6352	4.36703	0.00644763	0.307388	Up	0.0505638	0.967147	8:62723788:62745868:1	Sema7a
ENSRNOT00000010626	35.8284	0	71.6568	Inf	Inf	0.00280532	0.182076	Up	0	0.57378	6:106052212:106072703:1	Sipa1l1
ENSRNOT00000010639	3234.58	6085.01	384.16	0.0631322	-3.98548	1.85033e-05	0.00534397	Down	80.8994	5.05474	7:70807867:70815270:1	Stac3
ENSRNOT00000010674	2913.14	1171.59	4654.7	3.973	1.99023	0.0199635	0.578411	Up	9.90127	38.8714	5:147375350:147403571:1	Yars
ENSRNOT00000010688	679.365	234.116	1124.61	4.80366	2.26413	0.0119496	0.435799	Up	0.931959	4.4207	5:147403948:147412705:-1	RGD1561149
ENSRNOT00000010689	184.443	68.3257	300.56	4.39893	2.13715	0.0441323	0.844608	Up	0.904041	3.93511	8:99625545:99645881:1	Plscr2
ENSRNOT00000010871	806.362	256.221	1356.5	5.29426	2.40443	0.00726812	0.326951	Up	5.86606	30.7205	6:93549484:93562314:-1	Timm9
ENSRNOT00000010898	356.706	609.908	103.504	0.169705	-2.5589	0.00828781	0.358003	Down	3.40236	0.568326	4:89183768:89281222:-1	Fam13a
ENSRNOT00000011320	456.17	178.853	733.487	4.10107	2.036	0.0275505	0.67781	Up	2.09887	8.51979	10:70250959:70259553:-1	Nle1
ENSRNOT00000011432	13365	1669.96	25060	15.0063	3.9075	6.24837e-05	0.0138353	Up	11.1399	165.205	4:23112686:23135354:-1	Steap4
ENSRNOT00000011511	371.36	133.637	609.082	4.55774	2.18832	0.0213143	0.600779	Up	2.30907	10.4039	7:26472288:26478189:-1	RGD1563365
ENSRNOT00000011580	485.85	37.1772	934.524	25.137	4.65174	7.41042e-06	0.00252891	Up	0.290285	7.1563	4:169147243:169181966:1	Emp1
ENSRNOT00000011731	3815.88	1708.14	5923.63	3.46787	1.79405	0.0354166	0.775529	Up	11.3679	38.9657	5:114011189:114014277:-1	Jun
ENSRNOT00000011814	217.346	394.882	39.8093	0.100813	-3.31025	0.0022457	0.156476	Down	3.04515	0.300969	4:6297255:6330765:-1	Galnt11
ENSRNOT00000011851	46.7951	4.01916	89.571	22.286	4.47806	0.0139204	0.479941	Up	0.0475529	1.09374	4:57378166:57436884:1	Nrf1
ENSRNOT00000011890	45.2108	89.4263	0.995233	0.0111291	-6.48952	0.00292424	0.185333	Down	0.800636	0.0101766	2:100226328:100372252:-1	Hnf4g
ENSRNOT00000011904	92.1403	17.0814	167.199	9.78836	3.29107	0.0140796	0.482923	Up	0.147571	1.39635	7:94375020:94383024:1	Nov
ENSRNOT00000012093	325.912	517.467	134.356	0.259643	-1.9454	0.042282	0.835329	Down	7.30238	1.87858	15:37543727:37663584:-1	Cryl1
ENSRNOT00000012124	452.76	717.42	188.099	0.262188	-1.93133	0.0360469	0.784216	Down	5.3079	1.37815	6:127282466:127301083:1	Otub2
ENSRNOT00000012212	752.894	0	1505.79	Inf	Inf	5.32689e-14	3.53847e-10	Up	0	8.11572	4:170659998:170740274:-1	Gucy2c
ENSRNOT00000012271	542.411	839	245.823	0.292995	-1.77105	0.0493626	0.890434	Down	7.84089	2.26968	15:18647907:18695133:-1	Abhd6
ENSRNOT00000012363	28902.1	9105.41	48698.7	5.34833	2.41909	0.0120059	0.435799	Up	63.968	338.167	7:36643916:36660141:-1	Nudt4
ENSRNOT00000012463	359.336	12.0575	706.615	58.6039	5.87292	3.85837e-07	0.000202341	Up	0.0551648	3.30949	5:151436464:151448328:1	Map3k6
ENSRNOT00000012606	1687.77	702.348	2673.2	3.80608	1.92831	0.0242865	0.646689	Up	3.11709	11.7279	3:159995064:160013274:1	Ttpal
ENSRNOT00000012702	1322.58	610.912	2034.26	3.32987	1.73546	0.0426304	0.835329	Up	3.04211	10.0149	5:143027977:143055190:1	Gnl2
ENSRNOT00000012819	11460.2	21773.8	1146.51	0.0526554	-4.24727	1.57685e-05	0.00469006	Down	126.286	6.57052	5:19358734:19368431:-1	Cyp7a1
ENSRNOT00000012948	524.066	957.565	90.5662	0.0945797	-3.40233	0.000427924	0.0519979	Down	8.082	0.752404	15:45487645:45550285:-1	Gucy1b2
ENSRNOT00000013043	36645.9	7733.87	65558	8.47674	3.08351	0.00224046	0.156476	Up	62.0451	519.913	6:52122085:52156472:1	Nampt
ENSRNOT00000013067	25339.7	9545.51	41134	4.30925	2.10744	0.0254009	0.659239	Up	41.5352	176.919	15:51982982:52029816:-1	Slc39a14
ENSRNOT00000013119	21.8951	0	43.7902	Inf	Inf	0.0152856	0.507554	Up	0	0.524866	8:5734348:5742243:1	Mmp10
ENSRNOT00000013244	3663.23	1523.26	5803.2	3.80972	1.92969	0.0241654	0.646689	Up	10.4565	39.3696	8:94256839:94352246:-1	Me1
ENSRNOT00000013295	2039.17	824.933	3253.42	3.94386	1.97961	0.020631	0.5889	Up	5.94241	23.1694	10:94439077:94445503:-1	Ftsj3
ENSRNOT00000013343	2378.27	452.156	4304.38	9.51969	3.25092	0.000297653	0.0398095	Up	1.79498	16.8918	2:138819960:138833933:-1	Pcdh18
ENSRNOT00000013431	708.054	302.442	1113.67	3.68225	1.88059	0.033826	0.766456	Up	2.38628	8.67373	6:107428508:107431116:1	RGD1307704
ENSRNOT00000013496	5436.78	9380.72	1492.85	0.15914	-2.65163	0.00280974	0.182076	Down	40.8103	6.41996	8:22750336:22774903:1	Ldlr
ENSRNOT00000013515	2121.88	950.531	3293.23	3.46462	1.7927	0.0349008	0.774418	Up	8.22336	28.1769	6:107460668:107467487:1	Acot2
ENSRNOT00000013516	492.075	90.4311	893.719	9.88287	3.30493	0.000633866	0.0682794	Up	0.707433	6.93173	6:109913757:109935533:-1	Tgfb3
ENSRNOT00000013536	65.7236	8.03832	123.409	15.3526	3.94041	0.0112474	0.423336	Up	0.0464156	0.745425	4:156253079:156264769:1	Clec4d
ENSRNOT00000013548	697.168	315.504	1078.83	3.41939	1.77374	0.0448212	0.850085	Up	2.81542	9.51877	3:7051695:7056698:1	Mrps2
ENSRNOT00000013639	817.081	103.493	1530.67	14.79	3.88655	4.84636e-05	0.0114974	Up	0.524185	7.69947	10:65742343:65766050:-1	Sarm1
ENSRNOT00000013745	362.766	105.503	620.03	5.8769	2.55505	0.00824475	0.357955	Up	2.93381	17.0304	X:1364786:1369384:-1	Timp1
ENSRNOT00000013851	599.039	85.4072	1112.67	13.0278	3.70353	0.000132442	0.0233875	Up	1.34986	17.4622	1:157646173:157660008:1	Rab30
ENSRNOT00000013899	2363.81	551.63	4176	7.57029	2.92035	0.000978964	0.0935002	Up	4.21085	31.5286	5:139475934:139505065:-1	Ctps1
ENSRNOT00000013936	29.3737	3.01437	55.733	18.4891	4.2086	0.0464193	0.863719	Up	0.0272131	0.460057	8:5768811:5778702:1	Mmp8
ENSRNOT00000014034	224.91	415.983	33.8379	0.0813445	-3.61981	0.000935565	0.0913919	Down	7.76283	0.627091	2:263895290:263975834:1	Ptger3
ENSRNOT00000014073	334054	48962.4	619145	12.6453	3.66053	0.00722554	0.326951	Up	489.259	6115.64	6:128073344:128080878:1	LOC299282
ENSRNOT00000014118	181.319	39.1868	323.451	8.25407	3.04511	0.00601368	0.295736	Up	0.307635	2.49763	10:65304902:65329312:-1	Flot2
ENSRNOT00000014135	69.2732	126.604	11.9428	0.0943322	-3.40611	0.0211875	0.599225	Down	0.542276	0.0512424	8:22792000:22821223:-1	Kank2
ENSRNOT00000014191	677.551	1108.28	246.818	0.222703	-2.16681	0.0157822	0.513065	Down	9.86092	2.16915	7:117180812:117187367:-1	LOC680875
ENSRNOT00000014216	1180.49	552.635	1808.34	3.27221	1.71027	0.0464191	0.863719	Up	11.9777	38.7494	15:24153602:24165537:1	Lgals3
ENSRNOT00000014309	757.705	279.332	1236.08	4.42513	2.14572	0.0159612	0.516355	Up	3.35368	14.673	3:164665532:164711848:1	Ptpn1
ENSRNOT00000014373	1407.6	595.84	2219.37	3.72477	1.89715	0.0271724	0.674496	Up	3.44495	12.6757	6:52751106:52768574:1	Twistnb
ENSRNOT00000014533	619.857	172.824	1066.89	6.17328	2.62604	0.00430665	0.236427	Up	2.16871	13.2595	2:232128235:232137422:1	Tifa
ENSRNOT00000014603	413.337	66.3161	760.358	11.4657	3.51925	0.000407446	0.0498134	Up	0.660239	7.49114	4:115004448:115015965:-1	Mthfd2
ENSRNOT00000014701	281.602	94.4503	468.755	4.96298	2.31121	0.0197497	0.575397	Up	2.90597	14.2688	2:93792601:93797305:1	Fabp4
ENSRNOT00000014809	969.623	265.265	1673.98	6.31061	2.65778	0.00301654	0.18886	Up	2.1776	13.6027	16:54460067:54513349:-1	Slc7a2
ENSRNOT00000014934	1540.39	265.265	2815.51	10.614	3.40789	0.000181648	0.0294135	Up	4.39038	45.9821	5:165405168:165408320:1	Srm
ENSRNOT00000015172	294.442	492.347	96.5376	0.196076	-2.35051	0.0171723	0.533037	Down	3.68439	0.712125	18:35683185:35817117:-1	Mcc
ENSRNOT00000015185	442.796	191.915	693.677	3.6145	1.8538	0.0441457	0.844608	Up	0.782688	2.79446	2:91450162:91497091:-1	Pcsk1
ENSRNOT00000015199	81.164	11.0527	151.275	13.6867	3.77471	0.00848726	0.362171	Up	0.350441	4.88181	10:70884531:70886355:1	Ccl4
ENSRNOT00000015308	1043.17	243.159	1843.17	7.5801	2.92222	0.00121276	0.106364	Up	2.72968	20.4166	6:136150791:136156781:1	LOC103692719
ENSRNOT00000015351	147.39	20.0958	274.684	13.6687	3.77281	0.00178544	0.136943	Up	0.785441	10.5595	2:190097554:190100276:-1	S100a9
ENSRNOT00000015363	216.81	386.844	46.7759	0.120917	-3.04791	0.00438821	0.239584	Down	1.53392	0.184905	18:3861539:3940823:1	Lama3
ENSRNOT00000015393	55.2635	110.527	0	0	#NAME?	0.000310036	0.0406474	Down	0.607514	1.74702e-05	9:50664150:50744002:1	Tpp2
ENSRNOT00000015473	168.304	23.1102	313.498	13.5654	3.76186	0.0012996	0.111152	Up	1.28005	16.8692	2:190073815:190074354:1	S100a8
ENSRNOT00000015566	93.3165	159.762	26.8713	0.168196	-2.57178	0.0458522	0.860054	Down	0.796797	0.13334	1:24003625:24056373:-1	Slc2a12
ENSRNOT00000015612	434.562	134.642	734.482	5.45508	2.4476	0.00945364	0.37987	Up	5.87177	31.6014	2:190007216:190008511:1	S100a6
ENSRNOT00000015680	36.8332	2.00958	71.6568	35.6576	5.15614	0.0140578	0.482923	Up	0.0431933	1.33393	2:46538700:46544457:-1	Fst
ENSRNOT00000015763	474.227	208.996	739.458	3.53814	1.82299	0.0460496	0.860054	Up	1.97527	6.91713	2:157747542:157759819:-1	Ccnl1
ENSRNOT00000015845	2256.15	1036.94	3475.35	3.35154	1.74482	0.0396922	0.815449	Up	5.13806	17.0251	1:126749508:126947392:1	Pcsk6
ENSRNOT00000015918	1549.9	68.3257	3031.48	44.3681	5.47145	5.57862e-08	4.63211e-05	Up	0.32137	14.1586	9:20546159:20621051:-1	Tnfrsf21
ENSRNOT00000015961	920.799	1822.69	18.9094	0.0103745	-6.59082	1.82546e-09	2.30308e-06	Down	21.529	0.215982	5:134331929:134348995:-1	LOC100911581
ENSRNOT00000016012	117.49	11.0527	223.927	20.26	4.34056	0.00107369	0.0986015	Up	0.121333	2.41293	2:166226754:166255302:-1	B3galnt1
ENSRNOT00000016027	426.308	177.848	674.768	3.79407	1.92375	0.0379401	0.796703	Up	2.80417	10.5198	15:47211583:47270317:1	Pinx1
ENSRNOT00000016138	115.939	207.992	23.8856	0.114839	-3.12231	0.011928	0.435799	Down	4.66659	0.537593	17:8570472:8607494:-1	Slc25a48
ENSRNOT00000016230	821.84	371.772	1271.91	3.4212	1.7745	0.042591	0.835329	Up	2.10222	7.11055	5:144769452:144779212:-1	Ncdn
ENSRNOT00000016390	5723.35	9054.16	2392.54	0.264247	-1.92004	0.0265402	0.669376	Down	69.7017	18.2085	17:8400146:8429338:-1	Tgfbi
ENSRNOT00000016540	33419.1	54453.6	12384.7	0.227435	-2.13647	0.0267614	0.669376	Down	908.514	204.254	1:162381253:162385575:-1	Thrsp
ENSRNOT00000016543	656.317	200.958	1111.68	5.53188	2.46777	0.00669681	0.316242	Up	1.12446	6.15163	16:22537056:22561496:-1	Lpl
ENSRNOT00000016555	20.5982	41.1964	0	0	#NAME?	0.0179714	0.545936	Down	0.266106	5.76891e-06	15:52292765:52317219:-1	Dmtn
ENSRNOT00000016621	158.226	310.48	5.9714	0.0192328	-5.70029	2.14545e-05	0.00585678	Down	2.12046	0.0432825	2:157869392:158156150:-1	Veph1
ENSRNOT00000016677	3074.03	5284.19	863.862	0.16348	-2.61281	0.00284186	0.182099	Down	63.6667	10.2843	3:94665717:94686989:-1	Depdc7
ENSRNOT00000016688	22.1054	44.2108	0	0	#NAME?	0.0146733	0.493103	Down	0.37647	2.78366e-18	1:250559467:250630677:-1	Asah2
ENSRNOT00000016740	1042.77	1729.24	356.293	0.20604	-2.279	0.00959203	0.383066	Down	7.41232	1.51214	1:244630377:244782706:1	Smarca2
ENSRNOT00000016783	14.0671	28.1341	0	0	#NAME?	0.0459439	0.860054	Down	0.823662	4.31474e-06	1:162519521:162533893:-1	Aamdc
ENSRNOT00000016891	4059.05	6276.92	1841.18	0.293325	-1.76943	0.0381056	0.796955	Down	40.8304	11.8378	2:243701962:243721816:1	Adh4
ENSRNOT00000016930	219.327	392.873	45.7807	0.116528	-3.10125	0.00376281	0.216726	Down	4.78266	0.554962	1:234721974:234749447:-1	Nmrk1
ENSRNOT00000017181	209.094	20.0958	398.093	19.8098	4.30814	0.000185974	0.0294135	Up	0.212594	4.1717	7:120580743:120592095:1	Maff
ENSRNOT00000017319	625.234	1094.22	156.252	0.142798	-2.80796	0.00243482	0.166168	Down	34.0808	4.80483	3:176691329:176692271:1	Ppdpf
ENSRNOT00000017337	57.2157	102.489	11.9428	0.116528	-3.10125	0.0456231	0.85893	Down	0.980344	0.109015	3:176698305:176706896:-1	Ptk6
ENSRNOT00000017363	283.995	74.3545	493.635	6.63895	2.73095	0.00672932	0.316278	Up	0.552705	3.61788	8:104840940:104912959:-1	Spsb4
ENSRNOT00000017469	714.7	235.121	1194.28	5.07943	2.34467	0.00921359	0.375477	Up	3.03243	15.2292	8:115179893:115188588:1	Rrp9
ENSRNOT00000017629	723.933	1234.89	212.98	0.172469	-2.53559	0.00515063	0.269599	Down	6.33744	1.0795	19:10079765:10101451:-1	Mmp15
ENSRNOT00000017648	698.642	311.485	1085.8	3.48588	1.80152	0.0417234	0.829223	Up	3.79618	13.0836	8:36766977:36769162:1	Pus3
ENSRNOT00000017784	392.839	46.2203	739.458	15.9985	3.99987	9.73394e-05	0.0195937	Up	0.128119	2.02424	13:96775357:97173469:-1	Kif26b
ENSRNOT00000017805	4279.81	693.305	7866.32	11.3461	3.50413	0.000127234	0.0232617	Up	4.3175	48.3875	2:112868662:112933675:1	Nceh1
ENSRNOT00000017889	1337.44	595.84	2079.04	3.48926	1.80292	0.0355125	0.77598	Up	2.46395	8.494	4:127164453:127177477:1	Kbtbd8
ENSRNOT00000017949	1982.05	638.042	3326.07	5.21293	2.3821	0.00605767	0.295875	Up	5.80169	29.8725	10:66586924:66602987:-1	Wsb1
ENSRNOT00000017955	3518.73	1377.57	5659.89	4.10861	2.03865	0.0175635	0.538471	Up	8.24682	33.4964	17:49610548:49617065:1	Yae1d1
ENSRNOT00000018003	494.18	951.536	36.8236	0.0386991	-4.69156	6.22024e-06	0.00221352	Down	7.80854	0.295575	8:59507990:59529366:1	Hykk
ENSRNOT00000018064	42.2974	0	84.5948	Inf	Inf	0.0013247	0.112815	Up	1.36547e-07	1.41038	5:155649217:155668057:1	Wnt4
ENSRNOT00000018074	975.426	439.093	1511.76	3.44291	1.78363	0.0398121	0.816312	Up	7.39485	25.16	3:95406284:95418679:-1	Rcn1
ENSRNOT00000018145	438.3	711.391	165.209	0.232233	-2.10635	0.0235204	0.638211	Down	8.61996	1.97687	19:55258905:55268951:-1	Mvd
ENSRNOT00000018343	5447.43	8583.92	2310.93	0.269216	-1.89316	0.0283303	0.691023	Down	118.739	31.6	2:225827504:225847874:1	Gclm
ENSRNOT00000018368	22.1006	43.206	0.995233	0.0230346	-5.44005	0.0363279	0.784335	Down	0.824069	0.0107743	18:52031842:52047816:-1	LOC100174910
ENSRNOT00000018435	64.7468	116.556	12.938	0.111003	-3.17133	0.0335891	0.763243	Down	0.575992	0.0651491	2:250954397:250981623:-1	Clca2
ENSRNOT00000018556	15.4261	0	30.8522	Inf	Inf	0.0378676	0.796703	Up	9.13958e-17	0.36405	1:15893533:16203838:-1	Pde7b
ENSRNOT00000018628	19.5934	39.1868	0	0	#NAME?	0.0206276	0.5889	Down	0.0983779	6.44246e-12	2:149535484:149564113:-1	Igsf10
ENSRNOT00000018646	775.289	314.499	1236.08	3.93031	1.97464	0.0254753	0.659239	Up	7.7637	30.1853	18:1866080:1876613:1	Snrpd1
ENSRNOT00000018688	1551.92	388.854	2715	6.98205	2.80365	0.0015613	0.126323	Up	4.4164	30.4644	1:103172987:103177417:1	Tmem86a
ENSRNOT00000018776	6765.74	135.647	13395.8	98.7554	6.62579	7.04575e-10	1.08006e-06	Up	3.1276	306.155	3:11414186:11417546:-1	Lcn2
ENSRNOT00000018843	33.1581	66.3161	0	0	#NAME?	0.00378466	0.216726	Down	0.500668	5.09451e-06	18:31816155:32207801:-1	Arhgap26
ENSRNOT00000018990	1176.14	1836.76	515.531	0.280674	-1.83303	0.0334884	0.762212	Down	10.0643	2.79445	1:150797084:150976194:1	Nox4
ENSRNOT00000019004	2870.35	439.093	5301.61	12.074	3.59383	8.27702e-05	0.0175473	Up	3.70455	44.2214	5:156086497:156141537:-1	Alpl
ENSRNOT00000019033	4782.53	2183.41	7381.64	3.38079	1.75736	0.0401623	0.817785	Up	70.2357	234.7	16:75873881:75874519:-1	Map1lc3b2
ENSRNOT00000019056	1087.69	501.39	1673.98	3.33868	1.73928	0.0436941	0.842116	Up	3.50983	11.5847	1:257469538:257498844:-1	Noc3l
ENSRNOT00000019062	499.008	187.896	810.12	4.31154	2.1082	0.0216837	0.60676	Up	2.26182	9.65326	9:29634179:29647903:-1	Ogfrl1
ENSRNOT00000019080	11879.3	4130.69	19628	4.75174	2.24846	0.0129231	0.459879	Up	39.8273	187.056	5:140642885:140657745:-1	Mfsd2a
ENSRNOT00000019192	4972.64	1352.45	8592.84	6.35355	2.66756	0.00259499	0.172745	Up	17.7549	111.484	19:14508616:14515456:1	Hmox1
ENSRNOT00000019272	182.752	340.624	24.8808	0.0730449	-3.77507	0.00102133	0.0960046	Down	2.74466	0.194385	17:51898217:51912496:-1	Inhba
ENSRNOT00000019305	610.674	1067.09	154.261	0.144563	-2.79023	0.00262093	0.173521	Down	6.89806	0.986865	2:151314818:151320319:1	P2ry1
ENSRNOT00000019346	147285	1847.81	292723	158.416	7.30758	3.2072e-07	0.000177536	Up	8.30501	1300.59	4:154309426:154359137:1	LOC100911545
ENSRNOT00000019363	218.3	72.3449	364.255	5.03498	2.33199	0.0242979	0.646689	Up	1.58112	7.92446	16:24978527:24994718:1	Tma16
ENSRNOT00000019415	98.528	0	197.056	Inf	Inf	5.76238e-06	0.00208787	Up	0	2.78018	9:46840992:46881264:1	Il1r2
ENSRNOT00000019501	599.794	139.666	1059.92	7.58899	2.92391	0.00174683	0.13598	Up	1.44932	10.8584	2:251529354:251532312:-1	Cyr61
ENSRNOT00000019673	1195.35	329.571	2061.13	6.25397	2.64477	0.0028859	0.184328	Up	3.08841	19.0937	9:46996156:47035369:1	Il1r1
ENSRNOT00000019720	336.036	553.639	118.433	0.213917	-2.22488	0.0209694	0.595638	Down	2.79951	0.593371	4:70903253:70918514:1	Ephb6
ENSRNOT00000019772	2099.84	920.388	3279.29	3.56295	1.83307	0.0312307	0.730708	Up	2.26971	7.99822	9:78900113:78969013:-1	Fn1
ENSRNOT00000019778	851.089	348.662	1353.52	3.88203	1.95681	0.0259339	0.665137	Up	1.96934	7.56132	4:150153844:150185044:-1	Csgalnact2
ENSRNOT00000019787	5080.89	1616.71	8545.07	5.28548	2.40203	0.00616784	0.296178	Up	13.6829	71.5034	3:154786215:154813464:1	Lbp
ENSRNOT00000019874	622.684	244.164	1001.2	4.10054	2.03581	0.023539	0.638211	Up	3.13598	12.7243	1:261337594:261362509:1	Pi4k2a
ENSRNOT00000019939	3080.69	5220.89	940.495	0.180141	-2.4728	0.00451221	0.244346	Down	70.2832	12.5111	1:193424812:193430676:1	Aqp8
ENSRNOT00000019956	1868.83	3198.25	539.416	0.16866	-2.56781	0.00333272	0.201256	Down	15.1982	2.53418	1:264741911:264753397:1	Sema4g
ENSRNOT00000019993	447.74	708.377	187.104	0.26413	-1.92068	0.0372318	0.793535	Down	8.06594	2.10959	16:83288664:83325699:1	Cars2
ENSRNOT00000020012	4682.27	1715.18	7649.36	4.45981	2.15698	0.0128752	0.459	Up	10.4753	46.1883	17:57074525:57090888:1	Crem
ENSRNOT00000020043	2769.42	143.685	5395.16	37.5485	5.23068	1.17813e-07	8.3849e-05	Up	0.849275	31.545	10:58810058:58834538:-1	Slc13a5
ENSRNOT00000020049	1531.06	2697.86	364.255	0.135016	-2.88879	0.00116856	0.105213	Down	19.8263	2.64591	9:81615253:81634531:1	Pnkd
ENSRNOT00000020065	397.652	116.556	678.749	5.82339	2.54186	0.00784599	0.345154	Up	0.908428	5.2237	8:116012121:116045954:-1	Mapkapk3
ENSRNOT00000020144	65.1877	0	130.375	Inf	Inf	0.000114238	0.0218897	Up	4.00234e-10	1.02475	9:47165342:47174710:1	Il1rl1
ENSRNOT00000020204	39.6844	78.3736	0.995233	0.0126986	-6.29919	0.00523522	0.271515	Down	1.19508	0.0205739	17:57040023:57088502:1	Crem
ENSRNOT00000020229	1269.26	385.839	2152.69	5.57924	2.48007	0.00482305	0.256303	Up	3.43312	18.9079	1:141474180:141481315:-1	Pex11a
ENSRNOT00000020233	10905.2	17348.7	4461.63	0.257174	-1.95919	0.0279925	0.685199	Down	157.575	40.0613	10:14240219:14243597:1	Igfals
ENSRNOT00000020366	167.414	45.2156	289.613	6.40516	2.67923	0.0156579	0.510688	Up	0.422207	2.69855	5:78334284:78356460:1	Bspry
ENSRNOT00000020380	1411.93	2551.16	272.694	0.10689	-3.2258	0.000364682	0.0457068	Down	44.4012	4.69264	5:78358203:78361647:-1	Hdhd3
ENSRNOT00000020384	68.7475	16.0766	121.418	7.55247	2.91695	0.0433272	0.841473	Up	0.301147	2.27441	17:78739389:78741032:1	LOC102547897
ENSRNOT00000020401	342.108	574.74	109.476	0.190479	-2.3923	0.0134405	0.469898	Down	5.84159	1.10181	2:202798198:202816562:-1	Fam46c
ENSRNOT00000020476	3066.37	4930.5	1202.24	0.243837	-2.03601	0.0175064	0.538376	Down	17.4915	4.21581	9:119517101:119591533:1	Lpin2
ENSRNOT00000020528	987.193	192.92	1781.47	9.23424	3.20699	0.000469186	0.054678	Up	1.7015	15.5158	1:21851660:21854773:-1	Ctgf
ENSRNOT00000020536	3114.07	1043.98	5184.17	4.96579	2.31202	0.00755832	0.335461	Up	8.60456	42.2307	9:61720583:61744531:1	Mob4
ENSRNOT00000020823	369.862	132.632	607.092	4.57726	2.19448	0.0210439	0.596533	Up	1.32646	5.99997	16:6065326:6077978:-1	Il17rb
ENSRNOT00000020826	204.09	14.0671	394.112	28.0167	4.80821	5.62973e-05	0.0128953	Up	0.176922	4.92257	5:25349928:25353661:1	Gem
ENSRNOT00000020836	747.456	1158.52	336.389	0.29036	-1.78409	0.0427033	0.835329	Down	12.1658	3.49485	15:55034033:55073312:1	Rcbtb2
ENSRNOT00000020838	74.6425	0	149.285	Inf	Inf	4.59108e-05	0.011023	Up	0	0.961099	19:52147127:52186260:-1	Mbtps1
ENSRNOT00000020853	1157.44	414.978	1899.9	4.57831	2.19482	0.0119711	0.435799	Up	3.47298	15.6987	1:105113595:105200259:1	Prmt3
ENSRNOT00000020854	1802.61	573.735	3031.48	5.28376	2.40157	0.00575269	0.288639	Up	6.71889	35.0777	17:78735598:78756399:1	Hspa14
ENSRNOT00000020864	138.939	231.102	46.7759	0.202404	-2.30469	0.0432161	0.841026	Down	1.61497	0.320603	1:213886775:213897783:1	Pkp3
ENSRNOT00000021073	1583.26	699.334	2467.18	3.5279	1.81881	0.0332216	0.758351	Up	14.0755	49.0938	16:19385736:19399903:-1	Tpm4
ENSRNOT00000021129	450.524	142.68	758.367	5.31516	2.41011	0.0102011	0.399546	Up	1.02183	5.38663	13:25778317:25835957:1	Tnfrsf11a
ENSRNOT00000021134	5303.49	1860.87	8746.11	4.70001	2.23266	0.0105206	0.407886	Up	8.9364	41.521	10:59000397:59010903:1	Mybbp1a
ENSRNOT00000021155	2522.12	4540.65	503.588	0.110907	-3.17258	0.000395945	0.0487061	Down	44.8924	4.92045	5:162808646:162843383:1	Dhrs3
ENSRNOT00000021223	273.805	547.611	0	0	#NAME?	5.56224e-10	9.23703e-07	Down	2.47897	0.000150886	1:78459543:78521999:-1	Arhgap35
ENSRNOT00000021435	71.8425	143.685	0	0	#NAME?	5.82793e-05	0.0131976	Down	0.927085	0.00123427	3:155297566:155354841:1	Dhx35
ENSRNOT00000021496	1285.56	2138.19	432.926	0.202473	-2.3042	0.00834779	0.359298	Down	8.4451	1.68957	1:243276403:243398536:1	Kank1
ENSRNOT00000021527	66.766	122.584	10.9476	0.0893063	-3.48509	0.020427	0.586556	Down	1.01967	0.0873146	9:64745051:64843960:1	Spats2l
ENSRNOT00000021863	104.997	0	209.994	Inf	Inf	3.45132e-06	0.00143287	Up	2.82199e-07	1.5225	8:71372977:71533069:-1	Trip4
ENSRNOT00000021866	137.993	32.1533	243.832	7.58343	2.92285	0.0127943	0.459	Up	0.476097	3.61304	19:41710102:41724923:1	Marveld3
ENSRNOT00000022065	974.546	358.71	1590.38	4.43361	2.14848	0.014448	0.489028	Up	3.0404	13.332	17:26785029:26797161:1	Eef1e1
ENSRNOT00000022144	2414.71	581.773	4247.65	7.30122	2.86814	0.00117506	0.105213	Up	2.65202	19.1417	2:28049217:28061029:1	Enc1
ENSRNOT00000022256	20.5934	40.1916	0.995233	0.0247622	-5.33572	0.043613	0.842116	Down	2.46652	0.0534542	8:71514281:71526182:1	Ns5atp9
ENSRNOT00000022290	436.15	154.738	717.563	4.63729	2.21328	0.0178297	0.543289	Up	0.570019	2.60328	9:100380515:100437056:1	Sned1
ENSRNOT00000022309	29278.7	3640.35	54916.9	15.0856	3.9151	0.000138609	0.0242298	Up	37.4517	558.458	1:263246248:263269762:-1	Got1
ENSRNOT00000022499	2440.87	3883.51	998.219	0.25704	-1.95993	0.0217177	0.60676	Down	35.3222	8.97231	1:107262659:107363788:1	Gas2
ENSRNOT00000022522	725.392	1332.35	118.433	0.08889	-3.49184	0.000221577	0.0329521	Down	6.64128	0.581546	5:152573758:152589719:-1	Extl1
ENSRNOT00000022630	129.053	245.169	12.938	0.0527719	-4.24409	0.000956219	0.0920557	Down	10.7393	0.574623	17:43423111:43423580:1	Hist1h2ba
ENSRNOT00000022676	2451.4	552.635	4350.16	7.87168	2.97667	0.000801532	0.0810809	Up	5.72881	44.5475	9:66495832:66519769:1	Nop58
ENSRNOT00000022683	355.481	561.678	149.285	0.265784	-1.91167	0.0433403	0.841473	Down	3.41536	0.895954	1:32251714:32272476:-1	Tert
ENSRNOT00000022713	2431.68	4253.28	610.078	0.143437	-2.80151	0.00148084	0.122765	Down	39.1558	5.55272	5:152708775:152720229:1	Paqr7
ENSRNOT00000022867	20.0958	40.1916	0	0	#NAME?	0.0192491	0.565777	Down	0.38546	0.00445771	1:214182830:214197184:1	Lrrc56
ENSRNOT00000023029	483.486	167.8	799.172	4.76265	2.25176	0.0150176	0.502976	Up	1.35926	6.41795	9:50247692:50373284:1	Nck2
ENSRNOT00000023033	80.1927	16.0766	144.309	8.9763	3.16612	0.0228051	0.624258	Up	0.116135	1.04529	17:67887939:67945037:-1	Klf6
ENSRNOT00000023066	60.7755	118.565	2.9857	0.0251819	-5.31147	0.00255731	0.172005	Down	2.78166	0.0597799	7:121311046:121334437:1	Syngr1
ENSRNOT00000023068	274.157	98.4694	449.845	4.56837	2.19168	0.0269895	0.671469	Up	1.58796	7.13961	9:80118029:80144789:1	Igfbp2
ENSRNOT00000023097	1361.58	2114.08	609.082	0.288108	-1.79532	0.0361464	0.784335	Down	18.0983	5.15634	5:173024335:173046194:1	Slc35e2b
ENSRNOT00000023149	4726.3	7310.85	2141.74	0.292954	-1.77126	0.03863	0.804408	Down	22.5748	6.53656	17:31236015:31403685:1	Slc22a23
ENSRNOT00000023169	1747.85	779.717	2715.99	3.4833	1.80046	0.0345861	0.772522	Up	11.0345	37.9812	19:22699808:22726701:1	RGD1308706
ENSRNOT00000023189	279.961	63.3018	496.621	7.8453	2.97183	0.00360779	0.210839	Up	0.557089	4.29501	1:190889701:190914610:-1	Cdr2
ENSRNOT00000023287	39.3308	4.01916	74.6425	18.5717	4.21503	0.0268718	0.669376	Up	0.0653861	1.08149	5:166915330:166926636:-1	Spsb1
ENSRNOT00000023395	315.49	627.994	2.9857	0.00475434	-7.71654	8.68301e-09	9.10711e-06	Down	6.01173	0.0250127	17:89704102:89741321:-1	LOC100910779
ENSRNOT00000023463	968.68	380.815	1556.54	4.0874	2.03118	0.0202713	0.584613	Up	5.52103	22.3255	9:66851940:66877972:-1	Wdr12
ENSRNOT00000023554	18314.9	31216.8	5413.07	0.173402	-2.5278	0.00696223	0.320321	Down	199.275	34.1562	2:52431601:52445055:1	Hmgcs1
ENSRNOT00000023592	655.086	1197.71	112.461	0.093897	-3.41278	0.000321839	0.0416468	Down	28.4983	2.64267	9:93061900:93068130:1	LOC100362216
ENSRNOT00000023763	1160.97	426.031	1895.92	4.45019	2.15387	0.0135095	0.470839	Up	6.03282	26.5633	18:63415306:63488027:-1	Ptpn2
ENSRNOT00000023945	8946.88	2979.2	14914.6	5.00623	2.32372	0.0093708	0.37987	Up	18.9763	93.9036	17:70010794:70020982:1	Net1
ENSRNOT00000024030	775.318	320.528	1230.11	3.83775	1.94026	0.0279657	0.685199	Up	6.2691	23.7986	8:50222896:50228369:-1	Tagln
ENSRNOT00000024093	657.723	287.37	1028.08	3.57753	1.83897	0.0386924	0.804867	Up	3.93818	13.9262	1:240562423:240601744:-1	Aldh1a7
ENSRNOT00000024285	1128.29	460.194	1796.4	3.90356	1.96479	0.0234816	0.638211	Up	3.58866	13.8387	2:60450374:60461458:-1	Brix1
ENSRNOT00000024330	782.964	254.212	1311.72	5.15994	2.36735	0.00823948	0.357955	Up	1.53247	7.82644	9:43889473:44004325:1	Inpp4a
ENSRNOT00000024419	76.79	137.656	15.9237	0.115677	-3.11182	0.0268512	0.669376	Down	1.24732	0.141354	9:82208223:82214440:-1	Ihh
ENSRNOT00000024423	11587.5	4192.99	18982.1	4.5271	2.17859	0.0156166	0.510178	Up	38.4772	172.18	2:199796881:199823927:1	Fmo5
ENSRNOT00000024455	2310.23	3619.25	1001.2	0.276633	-1.85396	0.0293758	0.705687	Down	37.0129	10.1224	2:210045161:210068502:1	Slc16a4
ENSRNOT00000024488	3818.55	5930.27	1706.82	0.287816	-1.79678	0.0351545	0.774418	Down	56.5075	16.0797	1:224800252:224818482:1	Slc22a8
ENSRNOT00000024691	63.6949	0	127.39	Inf	Inf	0.000132617	0.0233875	Up	0.00178595	4.88157	8:16287804:16333603:1	Vkorc1l1
ENSRNOT00000024712	8543.65	3258.53	13828.8	4.24386	2.08538	0.0184359	0.554142	Up	25.9391	108.821	9:93368932:93377643:-1	Ncl
ENSRNOT00000024801	999.383	454.165	1544.6	3.40097	1.76595	0.0414777	0.826567	Up	3.3756	11.3554	2:30634354:30664163:-1	Rad17
ENSRNOT00000024841	926.77	357.705	1495.83	4.18175	2.06411	0.0187153	0.557487	Up	3.44938	14.2655	5:135882967:135949818:1	Eif2b3
ENSRNOT00000024850	690.532	280.336	1100.73	3.92645	1.97323	0.026686	0.669376	Up	1.99428	7.74921	1:170441639:170464341:-1	Trim3
ENSRNOT00000024882	1347.49	616.941	2078.05	3.36831	1.75202	0.0406772	0.817785	Up	3.37292	11.2287	3:121632043:121656506:1	Polr1b
ENSRNOT00000024917	101805	31012.8	172597	5.56535	2.47647	0.024522	0.646689	Up	329.777	1814.2	19:57321640:57333433:-1	Agt
ENSRNOT00000024938	780.988	257.226	1304.75	5.07238	2.34266	0.00888042	0.371004	Up	2.27874	11.4316	4:157647082:157658390:1	Nop2
ENSRNOT00000024941	4243.52	7606.26	880.781	0.115797	-3.11033	0.000536691	0.0607681	Down	56.4207	6.46059	1:255371810:255376833:-1	Ppp1r3c
ENSRNOT00000024947	1727.52	165.79	3289.24	19.8398	4.31032	5.43425e-06	0.00202856	Up	1.94417	38.165	18:63130542:63140181:1	Tubb6
ENSRNOT00000025097	224.227	376.796	71.6568	0.190174	-2.39461	0.0204205	0.586556	Down	2.70833	0.508932	1:167906061:167911961:-1	Olr59
ENSRNOT00000025134	1994	847.038	3140.95	3.70816	1.8907	0.0266428	0.669376	Up	7.02209	25.7404	7:117514533:117538342:-1	Bop1
ENSRNOT00000025159	973.982	344.643	1603.32	4.65212	2.21789	0.0117849	0.435273	Up	3.99422	18.3602	1:170466395:170471076:-1	Arfip2
ENSRNOT00000025221	699.183	216.03	1182.34	5.47302	2.45234	0.00676463	0.31629	Up	0.825964	4.47453	1:265809754:265826306:1	Pprc1
ENSRNOT00000025308	44.3022	3.01437	85.59	28.394	4.82751	0.0113898	0.42505	Up	0.047856	1.16572	10:56764927:56769437:1	Clec10a
ENSRNOT00000025314	101.15	28.1341	174.166	6.19055	2.63007	0.037011	0.791343	Up	0.10098	0.621859	2:187344056:187352568:1	Nes
ENSRNOT00000025319	1371.53	648.09	2094.97	3.23252	1.69266	0.0474734	0.874073	Up	5.94191	18.9801	1:214434626:214439720:1	Pnpla2
ENSRNOT00000025384	62.2307	6.02874	118.433	19.6447	4.29607	0.00807124	0.353502	Up	0.0251725	0.489846	2:187347602:187352969:1	Nes
ENSRNOT00000025391	528.971	837.995	219.946	0.262468	-1.92979	0.0335055	0.762212	Down	11.4222	2.97002	7:11930135:11942799:1	Btbd2
ENSRNOT00000025528	94.8236	162.776	26.8713	0.165081	-2.59875	0.0428682	0.837209	Down	0.880977	0.141699	3:13957136:13978224:-1	Phf19
ENSRNOT00000025582	34.3355	0	68.6711	Inf	Inf	0.00334531	0.201406	Up	0	1.37478	9:93731436:93735636:-1	Nppc
ENSRNOT00000025651	415.815	168.805	662.825	3.92658	1.97327	0.0340382	0.766456	Up	1.45079	5.62998	1:170574349:170578693:-1	Rrp8
ENSRNOT00000025791	2490.91	803.832	4177.99	5.19759	2.37784	0.00607764	0.296125	Up	4.57461	23.5153	1:265829108:265839818:1	Nolc1
ENSRNOT00000025794	14567.6	5524.34	23610.9	4.27398	2.09558	0.0212291	0.599225	Up	55.0448	232.542	1:47914759:47921587:-1	Sod2
ENSRNOT00000025800	23.3927	1.00479	45.7807	45.5625	5.50977	0.0315929	0.732589	Up	0.0431069	1.42583	2:210761729:210766501:-1	Gstm3
ENSRNOT00000025821	35.1485	66.3161	3.98093	0.0600296	-4.05818	0.0384277	0.801872	Down	2.88261	0.171072	2:200397967:200409528:1	Reg4
ENSRNOT00000025846	382.652	101.484	663.82	6.54115	2.70954	0.00508862	0.267562	Up	1.18561	7.6289	1:100224401:100226725:1	Fv1
ENSRNOT00000025856	36.3403	3.01437	69.6663	23.1114	4.53053	0.0239641	0.645348	Up	0.0534808	1.07275	1:252807065:252808380:-1	Ch25h
ENSRNOT00000025913	772.256	304.451	1240.06	4.0731	2.02613	0.0221498	0.613058	Up	3.32057	13.3616	1:80730499:80744831:-1	Bcl3
ENSRNOT00000026021	549.238	181.867	916.609	5.04	2.33342	0.0110357	0.418769	Up	3.15668	15.7664	1:85103519:85112619:1	Fbl
ENSRNOT00000026281	20.4071	1.00479	39.8093	39.6195	5.30814	0.0451793	0.854206	Up	0.00621407	0.244953	16:81549204:81583916:-1	LOC103693999
ENSRNOT00000026343	18.4118	0	36.8236	Inf	Inf	0.0245981	0.646689	Up	0	0.551462	8:130538651:130542227:1	Ackr2
ENSRNOT00000026467	34.3403	1.00479	67.6758	67.3532	6.07367	0.00945481	0.37987	Up	0.0148152	0.749027	9:82436458:82444668:1	Dnajb2
ENSRNOT00000026558	305.588	115.551	495.626	4.28925	2.10072	0.0306608	0.723945	Up	1.22805	5.19782	9:97355924:97367445:1	Ackr3
ENSRNOT00000026597	1820.98	3181.17	460.793	0.14485	-2.78737	0.00159575	0.127658	Down	39.0799	5.60181	16:20521956:20531396:1	Pgpep1
ENSRNOT00000026662	360.003	570.721	149.285	0.261573	-1.93472	0.0407174	0.817785	Down	3.24809	0.840904	10:88764732:88789057:1	Stat5a
ENSRNOT00000026726	1996.73	898.282	3095.17	3.44566	1.78478	0.0357655	0.780651	Up	5.39545	18.3792	2:202447745:202470399:-1	Wdr3
ENSRNOT00000026754	183.941	67.3209	300.56	4.46459	2.15853	0.0423382	0.835329	Up	0.506217	2.22752	1:143702853:143751789:-1	Hdgfrp3
ENSRNOT00000026760	14084.3	3517.77	24650.9	7.00754	2.80891	0.00260054	0.172745	Up	16.3282	113.11	10:88790408:88842233:-1	Stat3
ENSRNOT00000026831	985.423	1704.12	266.722	0.156516	-2.67562	0.00282491	0.182076	Down	16.5614	2.56623	9:17784468:17799005:1	Slc29a1
ENSRNOT00000026871	930.284	50.2395	1810.33	36.034	5.17129	3.39952e-07	0.000183096	Up	0.796281	28.2922	7:11646269:11648322:-1	Gadd45b
ENSRNOT00000026996	1641.06	716.415	2565.71	3.58132	1.84049	0.0311678	0.730708	Up	5.39886	19.116	19:38129584:38146956:1	Pla2g15
ENSRNOT00000027022	84.0972	0	168.194	Inf	Inf	1.94648e-05	0.00538743	Up	0	2.366	1:198284473:198288113:1	Doc2a
ENSRNOT00000027117	215.104	28.1341	402.074	14.2913	3.83707	0.00058705	0.0646339	Up	0.156292	2.23864	19:38162515:38179149:1	Slc7a6
ENSRNOT00000027145	816.869	372.777	1260.96	3.38261	1.75814	0.0445028	0.848662	Up	2.67458	8.93483	19:59874752:59894937:-1	Rbm34
ENSRNOT00000027178	48.7855	4.01916	93.5519	23.2765	4.5408	0.0117114	0.434609	Up	0.0588729	1.38328	1:220400855:220407189:1	LOC100911721
ENSRNOT00000027220	1580.61	2653.65	507.569	0.191272	-2.3863	0.00616565	0.296178	Down	24.7239	4.67812	9:98438439:98459080:1	Scly
ENSRNOT00000027237	84.6235	6.02874	163.218	27.0733	4.7588	0.00160678	0.127658	Up	0.0127237	0.368668	4:56711049:56738791:1	Flnc
ENSRNOT00000027315	3783.38	105.503	7461.26	70.7209	6.14406	2.91733e-09	3.41979e-06	Up	0.642211	44.8904	15:34378148:34392066:-1	Tgm1
ENSRNOT00000027340	243.006	454.165	31.8474	0.0701231	-3.83397	0.000442474	0.0531182	Down	1.72481	0.121196	18:30172740:30215896:1	Pcdha13
ENSRNOT00000027411	791.561	1224.84	358.284	0.292515	-1.77342	0.0431565	0.840687	Down	5.59953	1.61912	8:117358787:117366096:-1	Wdr6
ENSRNOT00000027432	369.916	667.181	72.652	0.108894	-3.199	0.00127437	0.110416	Down	9.85198	1.05705	5:137356801:137360580:1	RGD1305347
ENSRNOT00000027493	215.355	394.882	35.8284	0.0907318	-3.46225	0.00154683	0.126323	Down	2.67631	0.236994	2:211246068:211322719:-1	5330417C22Rik
ENSRNOT00000027552	1247.34	588.807	1905.87	3.23683	1.69458	0.0479103	0.877371	Up	7.84411	25.0975	8:117486083:117545564:1	Prkar2a
ENSRNOT00000027584	205.226	357.705	52.7473	0.14746	-2.7616	0.00962632	0.383667	Down	4.10866	0.601357	8:117576788:117599848:1	Ip6k2
ENSRNOT00000027653	761.011	346.653	1175.37	3.39063	1.76155	0.0450081	0.852586	Up	6.04048	20.2771	19:39257586:39259728:1	Nip7
ENSRNOT00000027847	221.14	355.696	86.5853	0.243425	-2.03845	0.0459499	0.860054	Down	2.46498	0.595604	7:11301957:11314535:1	Tjp3
ENSRNOT00000027891	24.3832	0	48.7664	Inf	Inf	0.0110744	0.418769	Up	0	0.598173	1:220826560:220835066:1	Fosl1
ENSRNOT00000027973	1219.27	441.103	1997.43	4.52827	2.17896	0.0123789	0.446895	Up	5.55639	24.8723	8:21905865:21909842:1	Ppan
ENSRNOT00000027996	91.8762	170.814	12.938	0.0757432	-3.72274	0.00675281	0.31629	Down	2.67731	0.200433	13:86391517:86451002:-1	Pbx1
ENSRNOT00000028034	871.985	243.159	1500.81	6.17213	2.62577	0.00351871	0.208451	Up	1.82287	11.1259	8:21984914:21995806:-1	S1pr2
ENSRNOT00000028131	42.6749	79.3784	5.9714	0.075227	-3.73261	0.0368305	0.789201	Down	0.615255	0.0451632	1:82550892:82580761:-1	Axl
ENSRNOT00000028179	495.626	0	991.252	Inf	Inf	2.24394e-12	8.94346e-09	Up	0	38.7947	10:89635675:89636193:1	Sap18
ENSRNOT00000028195	1106.69	1776.47	436.907	0.245941	-2.02361	0.0199692	0.578411	Down	13.3479	3.24607	1:217018916:217034890:1	Dhcr7
ENSRNOT00000028405	1008.48	378.806	1638.15	4.32452	2.11254	0.0158689	0.514326	Up	5.78193	24.7088	1:226996237:227002139:-1	Ccdc86
ENSRNOT00000028440	1110.97	2048.77	173.171	0.0845243	-3.56449	0.000120774	0.0229217	Down	8.26941	0.689667	2:195909626:195935878:-1	Cgn
ENSRNOT00000028445	52.7132	97.4646	7.96186	0.0816898	-3.6137	0.0280204	0.685199	Down	0.446877	0.0365188	10:90296141:90312386:-1	Slc4a1
ENSRNOT00000028545	26473.1	6256.83	46689.4	7.46215	2.89959	0.00293891	0.185337	Up	357.254	2635.12	1:89368021:89369960:-1	Hamp
ENSRNOT00000028546	1517.15	2703.89	330.417	0.122201	-3.03268	0.000708352	0.0750853	Down	32.6506	3.93874	1:101687855:101692846:1	Dbp
ENSRNOT00000028651	34.6461	65.3114	3.98093	0.0609531	-4.03616	0.0402084	0.817785	Down	0.387047	0.0214267	1:221872220:221908049:1	Nrxn2
ENSRNOT00000028698	20.4071	1.00479	39.8093	39.6195	5.30814	0.0451793	0.854206	Up	0.00770801	0.335033	1:90506697:90520012:-1	Kctd15
ENSRNOT00000028747	50.2395	100.479	0	0	#NAME?	0.000533561	0.0607589	Down	1.47824	0.000103852	2:198112076:198120120:-1	Plekho1
ENSRNOT00000028893	1041.96	303.447	1780.47	5.8675	2.55274	0.00409802	0.227909	Up	2.14043	12.4068	3:125458692:125470413:-1	Trmt6
ENSRNOT00000029001	2077.65	3265.57	889.738	0.27246	-1.87588	0.0277175	0.681079	Down	37.3707	10.0629	10:103832838:103848035:-1	Fads6
ENSRNOT00000029097	202.314	59.2826	345.346	5.82541	2.54236	0.0164119	0.521622	Up	0.440599	2.52463	7:135765303:135800481:-1	Pus7l
ENSRNOT00000029660	296.426	72.3449	520.507	7.1948	2.84695	0.00467785	0.251099	Up	1.54198	11.0438	3:148215540:148216718:1	Id1
ENSRNOT00000029692	550.033	139.666	960.4	6.87641	2.78166	0.00292955	0.185333	Up	1.42266	9.69155	12:13043038:13067341:-1	Fam220a
ENSRNOT00000029704	506.448	182.872	830.024	4.53883	2.18232	0.0176241	0.539164	Up	2.14478	9.63868	5:60572558:60588243:1	Polr1e
ENSRNOT00000029865	26.3784	1.00479	51.7521	51.5054	5.68665	0.0225058	0.618614	Up	0.00452965	0.217991	13:55061562:55173692:-1	Ptprc
ENSRNOT00000029922	65.2731	122.584	7.96186	0.0649501	-3.94453	0.011338	0.423908	Down	0.831996	0.0532434	3:93495106:93647680:1	Abtb2
ENSRNOT00000030016	224.274	386.844	61.7044	0.159507	-2.64831	0.0111843	0.422121	Down	3.27921	0.519283	5:139857363:139864393:-1	Zfp69
ENSRNOT00000030056	121.59	36.1724	207.008	5.72282	2.51673	0.0346177	0.772522	Up	0.518042	2.91459	7:34762656:34789370:-1	RGD1560341
ENSRNOT00000030082	970.146	1630.77	309.517	0.189798	-2.39746	0.00685797	0.317815	Down	16.5817	3.11075	7:126619196:126681752:1	Ppara
ENSRNOT00000030119	25.8761	0	51.7521	Inf	Inf	0.00919616	0.375477	Up	2.52963e-07	0.65876	3:162357356:162470065:1	Eya2
ENSRNOT00000030135	4137.45	7380.18	894.714	0.121232	-3.04416	0.000674688	0.0722859	Down	60.9248	7.30265	13:98451637:98478327:-1	Adck3
ENSRNOT00000030221	205.516	0	411.031	Inf	Inf	8.68122e-09	9.10711e-06	Up	0.00789217	24.6645	8:81949877:81968589:1	LOC100360828
ENSRNOT00000030222	699.638	206.987	1192.29	5.76022	2.52612	0.00540903	0.275474	Up	1.55982	8.88391	14:17247362:17274623:1	Sdad1
ENSRNOT00000030476	925.588	423.017	1428.16	3.37613	1.75537	0.043408	0.841473	Up	5.50071	18.3699	13:47440803:47443188:1	Yod1
ENSRNOT00000030540	2437.81	414.978	4460.63	10.7491	3.42614	0.000155182	0.0262074	Up	3.6447	38.7135	1:184299250:184407480:1	Insc
ENSRNOT00000030613	35.1533	67.3209	2.9857	0.0443502	-4.49491	0.0263726	0.669376	Down	1.87147	0.0776221	18:69841053:69849389:1	Mro
ENSRNOT00000030642	16.0766	32.1533	0	0	#NAME?	0.0340082	0.766456	Down	0.214114	0	20:32717564:32764035:1	Rfx6
ENSRNOT00000030798	1019.36	259.236	1779.48	6.86431	2.77912	0.00198113	0.147314	Up	0.633363	4.29707	2:231996088:232117134:-1	Alpk1
ENSRNOT00000030885	453.055	151.723	754.386	4.97212	2.31386	0.013246	0.465549	Up	1.09	5.36867	10:72136246:72142533:-1	Mrm1
ENSRNOT00000030913	71.6568	0	143.314	Inf	Inf	6.08577e-05	0.0136267	Up	1.69346e-13	3.32964	5:74766636:74786892:1	Palm2
ENSRNOT00000031117	1038.82	374.787	1702.84	4.5435	2.1838	0.0127665	0.459	Up	2.31592	10.4096	7:120593336:120636592:-1	Tmem184b
ENSRNOT00000031261	2898.92	1214.79	4583.05	3.7727	1.9156	0.0247435	0.647098	Up	5.17885	19.3067	9:66716969:66784487:1	Fam117b
ENSRNOT00000031866	37.8188	0	75.6377	Inf	Inf	0.00222194	0.156462	Up	1.18359e-09	0.81229	9:65885246:65917132:-1	Tmem237
ENSRNOT00000032158	692.915	1095.22	290.608	0.265342	-1.91408	0.0312006	0.730708	Down	3.68702	0.966459	4:147854309:147893992:-1	Plxnd1
ENSRNOT00000032218	233.717	70.3353	397.098	5.64578	2.49717	0.0153071	0.507554	Up	0.624606	3.47696	13:88636875:88943592:-1	LOC100361087
ENSRNOT00000032249	307.556	6.02874	609.082	101.03	6.65864	9.71851e-08	7.17298e-05	Up	0.113076	11.4257	12:38160464:38161546:1	Hcar2
ENSRNOT00000032280	1776.37	392.873	3159.86	8.04297	3.00773	0.000743272	0.0779575	Up	3.4572	27.4706	8:81766041:81793577:1	Onecut1
ENSRNOT00000032430	30.6365	59.2826	1.99047	0.0335759	-4.89643	0.0258455	0.663723	Down	0.158345	0.00526561	9:73529612:73683000:1	LOC689991
ENSRNOT00000032518	185.135	318.518	51.7521	0.162478	-2.62169	0.0153955	0.509624	Down	4.0527	0.645761	11:70967439:71007619:1	Iqcg
ENSRNOT00000032904	25.8808	1.00479	50.7569	50.5149	5.65864	0.0237903	0.641532	Up	0.0172508	0.569867	1:214317682:214326291:1	Tmem80
ENSRNOT00000032918	1522.62	400.911	2644.33	6.59581	2.72155	0.00207347	0.151071	Up	1.26793	8.26344	16:83824430:83848684:1	Irs2
ENSRNOT00000033017	27.1293	54.2587	0	0	#NAME?	0.00777857	0.342946	Down	0.353349	2.82236e-06	17:1709703:1797732:-1	Cdc14b
ENSRNOT00000033068	14.9285	0	29.857	Inf	Inf	0.0407908	0.817785	Up	0.00203316	0.126374	9:65110330:65167185:1	Aox3
ENSRNOT00000033119	2732.79	707.372	4758.21	6.7266	2.74988	0.00177235	0.136896	Up	4.29081	28.5424	20:7976713:8019020:-1	Fkbp5
ENSRNOT00000033196	4885.62	7747.94	2023.31	0.261142	-1.9371	0.0245881	0.646689	Down	52.3	13.5031	8:85059051:85097468:1	Gclc
ENSRNOT00000033533	193.633	326.557	60.7092	0.185907	-2.42735	0.0224455	0.617809	Down	4.09919	0.757392	6:76056591:76079664:-1	Ppp2r3c
ENSRNOT00000033677	4172.1	1587.57	6756.64	4.25597	2.08949	0.0154395	0.509624	Up	16.8038	70.6944	16:7097507:7103604:-1	Gnl3
ENSRNOT00000033695	156.5	52.2491	260.751	4.99054	2.3192	0.0364184	0.784591	Up	0.811031	4.01927	10:11338306:11343070:1	Ubald1
ENSRNOT00000033724	1550.31	676.224	2424.39	3.58519	1.84205	0.0312406	0.730708	Up	7.15334	25.3347	1:245476529:245514252:-1	Pum3
ENSRNOT00000033916	40.3069	0	80.6139	Inf	Inf	0.00166484	0.130618	Up	2.93671e-09	0.767252	16:24582002:24612698:-1	Naf1
ENSRNOT00000034240	173.419	52.2491	294.589	5.63816	2.49523	0.0222193	0.613363	Up	0.509602	2.81443	1:218945508:218954280:1	RGD1311946
ENSRNOT00000034266	294.44	73.3497	515.531	7.0284	2.8132	0.00516795	0.269599	Up	0.740991	5.13343	1:80267725:80271001:-1	Cd3eap
ENSRNOT00000034386	674.67	293.399	1055.94	3.599	1.8476	0.0374979	0.796651	Up	3.94354	14.0354	19:38397466:38409924:1	Nob1
ENSRNOT00000034487	1287.14	587.802	1986.48	3.37951	1.75682	0.04045	0.817785	Up	3.40542	11.3704	3:133178561:133232322:-1	Esf1
ENSRNOT00000034549	1191.26	516.462	1866.06	3.61316	1.85326	0.0316151	0.732589	Up	2.46556	8.80633	4:67242271:67301102:-1	Dennd2a
ENSRNOT00000034843	7131.8	12653.3	1610.29	0.127262	-2.97413	0.00106057	0.0978475	Down	101.086	12.7196	1:163317282:163328591:-1	Tsku
ENSRNOT00000035013	2421.63	885.22	3958.04	4.47125	2.16068	0.0119741	0.435799	Up	5.65637	24.9969	1:252102219:252116971:-1	RGD1565682
ENSRNOT00000035240	874.434	339.619	1409.25	4.1495	2.05294	0.0196827	0.574285	Up	12.1759	49.9605	2:193892589:193901236:1	S100a10
ENSRNOT00000035320	3588.19	1126.37	6050.02	5.37126	2.42526	0.00535331	0.274275	Up	6.74702	35.8257	6:23433532:23473169:-1	Wdr43
ENSRNOT00000035385	16.919	0	33.8379	Inf	Inf	0.0303959	0.720155	Up	0	0.282585	14:80926654:80958478:-1	Dok7
ENSRNOT00000035448	76.1401	1.00479	151.275	150.554	7.23414	0.00015484	0.0262074	Up	0.00558219	0.750174	17:21634551:21677477:-1	Gcnt2
ENSRNOT00000035839	28.6317	56.2682	0.995233	0.0176873	-5.82114	0.0173075	0.534733	Down	0.583155	0.0134486	17:8508174:8520147:-1	Fbxl3-ps1
ENSRNOT00000036137	3283.78	837.995	5729.56	6.83722	2.77341	0.00166104	0.130618	Up	4.08322	27.5839	12:39731121:39769480:-1	Pptc7
ENSRNOT00000036195	727.773	158.757	1296.79	8.16839	3.03005	0.00105936	0.0978475	Up	2.10705	17.0384	17:21580087:21591203:-1	Pak1ip1
ENSRNOT00000036247	38.8141	0	77.6282	Inf	Inf	0.00197889	0.147314	Up	0.00179832	1.39952	4:117800628:117814658:-1	Dusp11
ENSRNOT00000036435	552.419	1060.05	44.7855	0.0422483	-4.56496	7.63432e-06	0.00253561	Down	11.0015	0.462859	3:114355814:114378941:1	LOC691960
ENSRNOT00000036904	1271.23	2053.79	488.659	0.23793	-2.07139	0.0168346	0.528108	Down	18.857	4.43381	7:75279446:75288365:-1	Ankrd46
ENSRNOT00000037015	329.419	522.491	136.347	0.260956	-1.93812	0.0427099	0.835329	Down	1.39501	0.359619	3:63863951:64024205:-1	Ccdc141
ENSRNOT00000037251	389.436	167.8	611.073	3.64168	1.8646	0.0459972	0.860054	Up	0.976451	3.52502	12:12403385:12407561:-1	Bhlha15
ENSRNOT00000037276	413.965	721.439	106.49	0.147608	-2.76016	0.00405863	0.227192	Down	2.81869	0.411071	8:97537968:97575636:1	Adamts7
ENSRNOT00000037363	404.671	127.608	681.734	5.3424	2.41749	0.0108828	0.415465	Up	1.66692	8.78488	8:116311078:116318289:1	Rassf1
ENSRNOT00000038212	242.037	41.1964	442.879	10.7504	3.42632	0.00135055	0.114527	Up	2.41129	25.8331	19:11302125:11302938:-1	AC128848.1
ENSRNOT00000038376	373.998	688.281	59.714	0.0867581	-3.52686	0.000464856	0.054678	Down	5.54397	0.478933	10:70227163:70241254:-1	Rad51d
ENSRNOT00000038480	12344.8	4794.86	19894.7	4.14917	2.05282	0.022571	0.619552	Up	57.1676	234.466	7:143596511:143603803:-1	Krt8
ENSRNOT00000038543	915.811	1401.68	429.941	0.306732	-1.70495	0.0495573	0.890434	Down	7.37479	2.2349	2:178226596:178297172:-1	Fnip2
ENSRNOT00000038610	237.721	75.3593	400.084	5.30902	2.40844	0.0185526	0.555965	Up	1.13703	5.9746	9:42831742:42839837:-1	Neurl3
ENSRNOT00000038690	41.6988	83.3976	0	0	#NAME?	0.00139271	0.117105	Down	0.706561	0	10:65664667:65692023:-1	Slc13a2
ENSRNOT00000038827	457.712	712.396	203.027	0.284992	-1.811	0.048185	0.880945	Down	2.41057	0.677846	2:237751654:237958497:1	Tbck
ENSRNOT00000039002	23113.7	4477.34	41750	9.32473	3.22106	0.000997995	0.0942561	Up	19.8579	183.015	7:138088649:138100841:-1	Slc38a2
ENSRNOT00000039177	330.589	140.671	520.507	3.70018	1.8876	0.0479454	0.877371	Up	1.6442	5.99949	18:51844988:51996984:-1	2019-03-03
ENSRNOT00000039221	51.7569	1.00479	102.509	102.02	6.67271	0.00152627	0.125167	Up	0.0132054	1.00355	13:79378733:79388498:1	Tnfsf18
ENSRNOT00000039316	975.744	1552.4	399.088	0.257078	-1.95972	0.0247102	0.647076	Down	12.0436	3.05875	4:89693280:89695928:-1	Gprin3
ENSRNOT00000039857	1676.69	569.716	2783.67	4.88606	2.28867	0.00829975	0.358003	Up	3.46274	16.7355	7:131623181:131798236:-1	Cpne8
ENSRNOT00000040188	16.919	0	33.8379	Inf	Inf	0.0303959	0.720155	Up	2.40987e-20	0.63594	3:146379447:146396299:-1	Apmap
ENSRNOT00000040204	32.8522	2.00958	63.6949	31.6956	4.98621	0.0209824	0.595638	Up	0.0991045	2.76562	9:15637428:15646381:-1	Mrps10
ENSRNOT00000040215	71.1639	1.00479	141.323	140.649	7.13596	0.000240504	0.0352409	Up	0.00453571	0.615529	14:80975322:81053906:-1	Rgs12
ENSRNOT00000040461	18131.6	2701.88	33561.2	12.4214	3.63476	0.00021155	0.0319376	Up	34.2631	420.668	9:61655963:61675873:1	Coq10b
ENSRNOT00000040481	177.156	1.00479	353.308	351.623	8.45789	1.83015e-07	0.000110519	Up	0.0464275	19.9523	5:161889342:161889701:1	LOC100359951
ENSRNOT00000040482	83.8378	154.738	12.938	0.0836127	-3.58013	0.0106948	0.411438	Down	1.38194	0.10984	3:48293617:48372583:-1	Dpp4
ENSRNOT00000040740	322.953	0	645.906	Inf	Inf	1.22369e-10	2.21687e-07	Up	2.98067e-05	8.14977	1:261415200:261434720:1	Zfyve27
ENSRNOT00000040847	1240.05	101.484	2378.61	23.4383	4.5508	2.62675e-06	0.00113795	Up	0.719264	16.7292	2:56110777:56151531:-1	Osmr
ENSRNOT00000040879	260.901	450.146	71.6568	0.159186	-2.65122	0.00917007	0.375477	Down	3.22734	0.510075	9:4817854:4834255:1	LOC100910526
ENSRNOT00000040890	37.838	4.01916	71.6568	17.8288	4.15614	0.0306987	0.723981	Up	0.0237098	0.402733	7:142397371:142464043:1	Slc4a8
ENSRNOT00000041044	15.9237	0	31.8474	Inf	Inf	0.035169	0.774418	Up	0	0.156785	X:110404022:110411039:1	Mum1l1
ENSRNOT00000041138	19.091	38.182	0	0	#NAME?	0.0221142	0.612922	Down	0.206989	7.93116e-08	X:72379037:72515144:-1	Phka1
ENSRNOT00000041237	6366.28	2150.25	10582.3	4.92143	2.29908	0.00901868	0.374938	Up	24.1969	117.686	18:40586315:40597671:1	Eif1a
ENSRNOT00000041281	27.6269	54.2587	0.995233	0.0183424	-5.76868	0.0193233	0.56712	Down	0.187496	0.00366679	12:46334688:46414434:-1	Cit
ENSRNOT00000041367	25770.2	46688.6	4851.76	0.103918	-3.26649	0.000949472	0.0918499	Down	959.685	98.5886	1:76558728:76614279:-1	Sult2a2
ENSRNOT00000041373	34.6653	69.3305	0	0	#NAME?	0.00316471	0.192275	Down	0.383973	0.000576621	6:73358112:73365933:1	Arhgap5
ENSRNOT00000041374	2307.23	790.77	3823.68	4.8354	2.27363	0.00845871	0.362171	Up	14.1859	67.7887	5:98469047:98515125:1	Lurap1l
ENSRNOT00000041688	145.049	260.241	29.857	0.114728	-3.12371	0.00763263	0.338007	Down	4.85529	0.546236	3:159368273:159384775:1	Sgk2
ENSRNOT00000041859	24.3832	0	48.7664	Inf	Inf	0.0110744	0.418769	Up	0.000232007	0.27505	8:99977334:100059736:1	Plod2
ENSRNOT00000042055	4558.16	7845.4	1270.91	0.161995	-2.62598	0.00290992	0.185268	Down	79.5973	12.7479	15:28305821:28314459:-1	Ndrg2
ENSRNOT00000042524	659.421	1167.57	151.275	0.129565	-2.94825	0.00149366	0.122999	Down	5.66092	0.724714	1:166141954:166395915:1	Fchsd2
ENSRNOT00000042643	5021.71	1834.75	8208.68	4.47401	2.16157	0.0128754	0.459	Up	99.232	438.892	10:71047310:71053191:1	Wfdc21
ENSRNOT00000042777	16.4213	0	32.8427	Inf	Inf	0.0326827	0.750346	Up	1.44998e-06	1.13749	11:67451549:67529051:1	Stfa2l3
ENSRNOT00000042872	45.1773	82.3928	7.96186	0.096633	-3.37134	0.0490674	0.890434	Down	0.933171	0.0944155	4:162181158:162230859:-1	LOC689757
ENSRNOT00000042965	35.1677	70.3353	0	0	#NAME?	0.00298214	0.18747	Down	1.91083	3.58438e-15	14:114152472:114173643:1	Rtn4
ENSRNOT00000043172	12667.3	21443.2	3891.36	0.181473	-2.46218	0.0071116	0.324802	Down	102.573	18.4024	10:88392248:88442845:-1	Acly
ENSRNOT00000043476	95.4073	180.862	9.95233	0.0550271	-4.18371	0.00274934	0.180227	Down	0.412	0.0220321	4:145703046:145948996:-1	Atp2b2
ENSRNOT00000043517	138.84	1.00479	276.675	275.356	8.10515	1.54515e-06	0.000716085	Up	0.0415091	13.3883	1:248402980:248403399:1	LOC100361898
ENSRNOT00000043533	3415.65	5965.44	865.853	0.145145	-2.78443	0.0016079	0.127658	Down	67.9676	9.75692	3:28416954:28566928:1	Kynu
ENSRNOT00000043736	2993.4	4966.68	1020.11	0.205392	-2.28355	0.00824049	0.357955	Down	37.6412	7.64383	18:55505993:55508704:1	RGD1309362
ENSRNOT00000044131	64.6949	1.00479	128.385	127.773	6.99744	0.00043487	0.0525217	Up	0.00601777	0.71468	5:120503475:120682283:1	Leprot
ENSRNOT00000044152	78.1258	0	156.252	Inf	Inf	3.32685e-05	0.00839208	Up	2.00534e-32	1.43749	6:129052503:129059050:1	RGD1565462
ENSRNOT00000044171	6693.52	11632.5	1754.6	0.150836	-2.72895	0.00234593	0.16238	Down	129.317	19.2812	16:26859397:26875973:1	Msmo1
ENSRNOT00000044486	2512.99	1156.51	3869.47	3.3458	1.74235	0.0399177	0.816312	Up	9.61497	31.7875	1:239266921:239301176:1	Abhd17b
ENSRNOT00000044559	14.9285	0	29.857	Inf	Inf	0.0407908	0.817785	Up	7.69798e-07	0.320243	17:10599223:10622226:-1	Simc1
ENSRNOT00000044565	122.969	12.0575	233.88	19.3971	4.27777	0.00104726	0.0978475	Up	0.130736	2.42205	1:215030429:215033460:-1	Dusp8
ENSRNOT00000045053	2050.28	962.589	3137.97	3.25993	1.70484	0.044332	0.847026	Up	8.39729	27.061	5:173189592:173209768:-1	Atad3a
ENSRNOT00000045068	203.376	73.3497	333.403	4.54539	2.1844	0.0362568	0.784335	Up	0.283048	1.27632	14:80982162:81053905:-1	Rgs12
ENSRNOT00000045223	41.6845	80.3832	2.9857	0.0371433	-4.75075	0.0142553	0.488109	Down	0.304795	0.0129507	12:37923528:37958363:1	Abcb9
ENSRNOT00000045400	696.787	26.1245	1367.45	52.3435	5.70994	8.25827e-08	6.32964e-05	Up	0.0339475	1.72778	5:141040752:141229781:-1	Macf1
ENSRNOT00000045438	486.085	818.904	153.266	0.18716	-2.41766	0.00943469	0.37987	Down	9.9398	1.83474	2:93669765:93671457:1	Slc10a5
ENSRNOT00000045488	1175.66	2049.77	301.556	0.147117	-2.76497	0.00194992	0.146082	Down	8.202	1.19422	8:22791995:22821397:-1	Kank2
ENSRNOT00000045553	1037.05	422.012	1652.09	3.91479	1.96893	0.0236997	0.64042	Up	1.85333	7.17412	7:132071116:132143470:-1	Kif21a
ENSRNOT00000045656	35.6605	69.3305	1.99047	0.0287098	-5.12231	0.0155501	0.509674	Down	0.846633	0.0202192	1:282678166:282685528:1	Ces2
ENSRNOT00000045902	145.548	51.2443	239.851	4.68054	2.22668	0.0475214	0.874073	Up	0.518809	2.4101	10:97735567:97756521:-1	Slc16a6
ENSRNOT00000046190	21.1006	42.2012	0	0	#NAME?	0.0167872	0.527659	Down	0.303427	0.00351029	12:44538476:44911147:-1	Ksr2
ENSRNOT00000046539	203.348	67.3209	339.374	5.04114	2.33375	0.0261423	0.668759	Up	0.970251	4.85867	1:7816838:8038665:-1	Aig1
ENSRNOT00000046942	9612.85	14941.2	4284.48	0.286755	-1.80211	0.040948	0.819288	Down	186.463	52.852	2:200785507:200808501:1	Hao2
ENSRNOT00000047126	267.019	62.297	471.74	7.57244	2.92076	0.00442426	0.240892	Up	0.330536	2.46253	4:22225461:22307453:-1	Abcb4
ENSRNOT00000047241	28.1341	56.2682	0	0	#NAME?	0.00688961	0.317815	Down	0.274913	0.000200853	7:2643288:2667321:1	Timeless
ENSRNOT00000047314	170.969	60.2874	281.651	4.6718	2.22398	0.039939	0.816312	Up	1.19546	5.50423	16:54358471:54383643:1	Mtus1
ENSRNOT00000047324	434.313	82.3928	786.234	9.54251	3.25437	0.000869436	0.0861996	Up	1.1444	10.8035	6:127647184:127653124:-1	Serpina11
ENSRNOT00000047615	2044.74	3563.99	525.483	0.147442	-2.76178	0.00171535	0.134053	Down	27.3784	3.99361	9:4866705:4879755:-1	Sult1c2a
ENSRNOT00000047634	1549.67	438.088	2661.25	6.07469	2.60281	0.00306962	0.190565	Up	2.8223	16.9322	12:17252093:17263477:1	Zfand2a
ENSRNOT00000047663	38.3165	0	76.6329	Inf	Inf	0.00209676	0.151392	Up	1.14013e-18	4.14893	20:3677474:3677847:1	Mt1m
ENSRNOT00000047717	3200.54	1436.85	4964.22	3.45493	1.78866	0.035453	0.775529	Up	18.021	61.5345	8:117347029:117351610:1	Impdh2
ENSRNOT00000047831	1115.31	2020.63	209.994	0.103925	-3.26639	0.000353498	0.0445855	Down	12.2574	1.26129	1:171820423:171966179:1	Ppfibp2
ENSRNOT00000048022	665.053	259.236	1070.87	4.13087	2.04645	0.0222224	0.613363	Up	2.05044	8.37264	X:135092040:135117455:1	Utp14a
ENSRNOT00000048509	893.753	1472.02	315.489	0.214324	-2.22213	0.0119952	0.435799	Down	7.08913	1.50188	14:60256712:60276794:-1	Slc34a2
ENSRNOT00000048535	94.9527	189.905	0	0	#NAME?	7.48723e-06	0.00252891	Down	3.68479	1.12029e-06	20:2704376:2707120:-1	LOC100364500
ENSRNOT00000048543	2080.97	3230.4	931.538	0.288366	-1.79403	0.0347988	0.773963	Down	16.5192	4.71175	10:64865805:64915148:-1	Sez6
ENSRNOT00000048858	60.7898	121.58	0	0	#NAME?	0.000173974	0.0286526	Down	2.27768	5.03899e-06	20:154658:157665:-1	RT1-CE10
ENSRNOT00000049729	5810.18	9419.91	2200.46	0.233597	-2.09791	0.0160389	0.517282	Down	84.2969	19.4661	8:103337472:103339768:1	Paqr9
ENSRNOT00000049873	170.661	309.475	31.8474	0.102908	-3.28057	0.00388467	0.219999	Down	4.1689	0.421656	13:89586336:89591277:1	Nr1i3
ENSRNOT00000050010	1927.3	3250.5	604.106	0.185851	-2.42779	0.00524555	0.271515	Down	35.2399	6.47841	1:224319918:224389499:-1	UST4r
ENSRNOT00000050191	2385.9	1010.82	3760.98	3.72073	1.89559	0.0261144	0.668759	Up	5.72966	21.0634	9:98190829:98257735:1	Lrrfip1
ENSRNOT00000050350	440.327	195.934	684.72	3.49465	1.80515	0.0497838	0.891841	Up	1.40118	4.83854	6:132771028:132802210:-1	Wars
ENSRNOT00000050393	14.9285	0	29.857	Inf	Inf	0.0407908	0.817785	Up	0.000604606	0.198706	1:188448604:188552265:1	LOC361635
ENSRNOT00000050515	187.58	309.475	65.6854	0.212248	-2.23618	0.0352335	0.774752	Down	2.48046	0.516725	3:62758758:62761325:-1	Ttc30b
ENSRNOT00000050543	70.1687	1.00479	139.333	138.668	7.11549	0.000263058	0.0376205	Up	0.0097806	0.983275	8:128659884:128665988:-1	Csrnp1
ENSRNOT00000050597	1229.8	458.184	2001.41	4.36814	2.12702	0.0144118	0.489028	Up	2.81592	12.1546	5:120568242:120652220:1	Leprot
ENSRNOT00000051268	4087.27	1955.32	6219.21	3.18066	1.66933	0.0497659	0.891841	Up	77.4298	243.482	MT:13543:14061:-1	Mt-nd6
ENSRNOT00000051449	177.156	1.00479	353.308	351.623	8.45789	1.83015e-07	0.000110519	Up	0.0464275	19.9523	9:1012091:1012450:-1	LOC100362149
ENSRNOT00000051504	155.518	264.26	46.7759	0.177007	-2.49812	0.0254851	0.659239	Down	3.61007	0.636305	8:70994563:71022299:1	Spg21
ENSRNOT00000051678	87.8236	155.742	19.9047	0.127805	-2.96798	0.0264463	0.669376	Down	3.32447	0.429206	20:10889573:10912769:-1	RGD1566085
ENSRNOT00000051720	11188.6	20436.4	1940.7	0.094963	-3.39649	0.000325197	0.0418099	Down	96.9441	9.09992	16:60415229:60427474:-1	Ppp1r3b
ENSRNOT00000051749	1463.7	672.205	2255.2	3.35493	1.74628	0.0408325	0.817799	Up	19.1626	63.5545	1:222229835:222231944:1	Ppp1r14b
ENSRNOT00000051892	722.848	1111.3	334.398	0.300908	-1.73261	0.0491771	0.890434	Down	6.39379	1.90364	1:82327955:82344345:-1	Ceacam1
ENSRNOT00000052312	14.0671	28.1341	0	0	#NAME?	0.0459439	0.860054	Down	0.248537	4.73492e-13	3:111422267:111452600:1	Nusap1
ENSRNOT00000054679	42.3022	1.00479	83.5996	83.201	6.37853	0.00404068	0.226824	Up	0.019569	1.58736	1:277853875:277867630:-1	Ablim1
ENSRNOT00000054915	147.049	262.25	31.8474	0.121439	-3.04169	0.00886291	0.371004	Down	7.95028	0.954477	10:110631494:110642260:1	Fn3k
ENSRNOT00000054917	167.604	294.403	40.8045	0.138601	-2.85099	0.0106927	0.411438	Down	3.21908	0.444495	10:110557729:110585376:-1	Rab40b
ENSRNOT00000055034	183.374	366.748	0	0	#NAME?	2.40548e-08	2.28268e-05	Down	6.41309	0	1:196857491:196883051:-1	Nsmce1
ENSRNOT00000055254	216.726	55.2635	378.188	6.84337	2.77471	0.00863431	0.36528	Up	0.778985	5.2288	3:151285249:151289595:1	Procr
ENSRNOT00000055473	19.5934	39.1868	0	0	#NAME?	0.0206276	0.5889	Down	0.470014	1.59849e-25	4:181103774:181158200:1	Arntl2
ENSRNOT00000055664	230.734	384.835	76.6329	0.199132	-2.3282	0.0230994	0.628858	Down	8.89789	1.74467	10:77840568:77918191:-1	Hlf
ENSRNOT00000055805	57.7181	103.493	11.9428	0.115397	-3.11533	0.0441631	0.844608	Down	2.2026	0.259503	7:130347945:130350570:-1	Odf3b
ENSRNOT00000055985	17.0814	34.1629	0	0	#NAME?	0.0293562	0.705687	Down	0.225997	0.000235848	4:157523770:157552596:1	Zfp384
ENSRNOT00000056100	412.726	670.195	155.256	0.231658	-2.10993	0.0242085	0.646689	Down	7.03432	1.60676	8:119260618:119265157:-1	Rtp3
ENSRNOT00000056251	173.171	0	346.341	Inf	Inf	4.24832e-08	3.68089e-05	Up	1.28941e-05	4.79035	9:121831716:121877795:1	Yes1
ENSRNOT00000056278	448.648	166.795	730.501	4.37963	2.13081	0.0217591	0.60676	Up	2.32701	10.0872	10:64398339:64405017:1	Rnmtl1
ENSRNOT00000056531	65.2397	115.551	14.9285	0.129194	-2.95239	0.0448105	0.850085	Down	1.17673	0.150293	8:111064049:111116014:-1	Cep63
ENSRNOT00000056675	2066.41	692.3	3440.52	4.96969	2.31316	0.00751248	0.334171	Up	7.14867	35.0977	12:52467450:52474511:1	Pgam5
ENSRNOT00000056704	284.129	102.489	465.769	4.54459	2.18415	0.0266432	0.669376	Up	0.576238	2.57605	8:99977334:100059736:1	Plod2
ENSRNOT00000056727	185.228	24.115	346.341	14.3621	3.84419	0.00083589	0.0837066	Up	0.325064	4.53357	8:99625602:99645881:1	Plscr2
ENSRNOT00000056800	50.2395	100.479	0	0	#NAME?	0.000533561	0.0607589	Down	1.17695	4.34629e-24	12:51846097:51877624:-1	Chek2
ENSRNOT00000056923	339.709	70.3353	609.082	8.6597	3.11432	0.0018422	0.14012	Up	0.773598	6.61058	2:187415262:187424045:1	Gpatch4
ENSRNOT00000057199	888.64	396.892	1380.39	3.47799	1.79826	0.0392017	0.812071	Up	2.52005	8.6629	14:86414976:86480156:1	Ogdh
ENSRNOT00000057271	73.6472	0	147.294	Inf	Inf	5.04028e-05	0.0116794	Up	2.00934e-32	1.37291	6:127927650:127934162:1	LOC100909605
ENSRNOT00000057855	144.457	31.1485	257.765	8.27537	3.04882	0.00904059	0.374938	Up	0.544941	4.39077	17:78915604:78919143:1	Rpp38
ENSRNOT00000057897	190.197	336.605	43.7902	0.130094	-2.94237	0.00704842	0.322899	Down	0.594912	0.0772279	16:78539489:78850222:1	Csmd1
ENSRNOT00000057898	66935.1	4536.63	129333	28.5087	4.83333	3.20815e-05	0.00819642	Up	239.738	6755.31	17:78793336:78793724:1	Mt1
ENSRNOT00000058152	17.5838	35.1677	0	0	#NAME?	0.0273142	0.674496	Down	0.3094	0.00168815	18:86299463:86392713:1	Cd226
ENSRNOT00000058367	944.002	1574.51	313.498	0.199109	-2.32837	0.00855805	0.364412	Down	25.9745	5.11663	17:69441223:69460321:-1	Akr1c1
ENSRNOT00000058589	18.5886	37.1772	0	0	#NAME?	0.0237169	0.64042	Down	0.585097	2.45409e-12	7:54021832:54026789:1	Osbpl8
ENSRNOT00000058834	36.3451	4.01916	68.6711	17.0859	4.09474	0.0350864	0.774418	Up	0.0200202	0.305066	X:36930186:37003642:-1	Adgrg2
ENSRNOT00000058891	150.968	249.188	52.7473	0.211677	-2.24006	0.044386	0.847246	Down	1.76286	0.371678	19:43932946:43955747:-1	Bcar1
ENSRNOT00000058893	34.8427	2.00958	67.6758	33.6766	5.07367	0.0171663	0.533037	Up	0.0189919	0.566668	5:90419020:90488896:1	Rasef
ENSRNOT00000059159	20.8999	0	41.7998	Inf	Inf	0.0174682	0.538032	Up	0	2.59676	9:53440272:53440595:1	LOC685203
ENSRNOT00000059183	409.496	723.449	95.5423	0.132065	-2.92068	0.00256561	0.172005	Down	4.00767	0.524367	5:78483893:78567279:1	Rgs3
ENSRNOT00000059264	69.6854	4.01916	135.352	33.6766	5.07367	0.00207714	0.151071	Up	0.0281075	0.880517	20:5881676:5927070:-1	Slc26a8
ENSRNOT00000059430	203.066	8.03832	398.093	49.5244	5.63007	7.92976e-06	0.00259056	Up	0.044138	2.14191	3:37955069:38090526:-1	Cacnb4
ENSRNOT00000059892	987.747	1878.96	96.5376	0.0513783	-4.2827	9.15767e-06	0.00294345	Down	18.6544	0.94778	4:62797677:62840357:-1	Slc13a4
ENSRNOT00000059895	16.919	0	33.8379	Inf	Inf	0.0303959	0.720155	Up	1.91756e-05	0.160599	10:18140356:18443934:-1	Ranbp17
ENSRNOT00000059987	7651.16	11887.7	3414.64	0.287242	-1.79966	0.0390781	0.811196	Down	94.3428	26.7843	15:34234755:34244504:1	Dcaf11
ENSRNOT00000060515	441.103	882.206	0	0	#NAME?	6.24387e-12	2.0738e-08	Down	10.6029	0.00395572	14:88543630:88574195:1	LOC100911576
ENSRNOT00000060530	36013.4	8983.83	63043	7.01739	2.81093	0.00476769	0.25472	Up	66.3999	460.595	4:50152452:50200328:-1	Aass
ENSRNOT00000060551	51.7228	98.4694	4.97616	0.0505351	-4.30657	0.012951	0.460048	Down	1.21941	0.0666831	10:14174732:14206025:1	Meiob
ENSRNOT00000060608	62.2779	120.575	3.98093	0.0330163	-4.92068	0.00367514	0.214147	Down	1.15654	0.035351	12:14021727:14078134:1	Mmd2
ENSRNOT00000061054	503.568	937.469	69.6663	0.0743132	-3.75024	0.000143325	0.0248363	Down	9.39627	0.691383	18:24708115:24746159:1	Lims2
ENSRNOT00000061299	94.3786	173.829	14.9285	0.0858805	-3.54153	0.00864931	0.36528	Down	4.24343	0.354821	20:3246739:3249188:1	LOC100909797
ENSRNOT00000061344	64.2546	13.0623	115.447	8.8382	3.14375	0.0354291	0.775529	Up	0.0840568	0.734487	18:12008759:12038053:1	Dsg1
ENSRNOT00000061430	1174.04	556.654	1791.42	3.21819	1.68625	0.0494606	0.890434	Up	2.78856	8.87093	9:16737642:16747225:1	Srf
ENSRNOT00000061644	24.115	48.2299	0	0	#NAME?	0.0113014	0.423336	Down	0.544496	0.000218555	10:1312666:1461123:-1	Parn
ENSRNOT00000061735	917.392	373.782	1461	3.9087	1.96669	0.0246696	0.647076	Up	1.65636	6.40618	3:3662324:3691972:-1	Qsox2
ENSRNOT00000061786	24.6174	49.2347	0	0	#NAME?	0.0106062	0.410409	Down	1.31685	1.18816e-07	6:108745895:108756130:1	Eif3h
ENSRNOT00000062006	564.693	920.388	208.999	0.227077	-2.13875	0.0186635	0.557487	Down	9.99926	2.24581	5:4946694:4975436:-1	Xkr9
ENSRNOT00000063787	333.828	89.4263	578.23	6.466	2.69287	0.0061679	0.296178	Up	2.6868	17.2441	8:129241109:129243402:1	Rpl14
ENSRNOT00000063821	27.8665	0	55.733	Inf	Inf	0.00722025	0.326951	Up	6.12428e-05	0.327093	2:18490102:18565842:-1	Vcan
ENSRNOT00000063831	37.8188	0	75.6377	Inf	Inf	0.00222194	0.156462	Up	3.19478e-09	0.280344	15:3760867:3773340:-1	Zswim8
ENSRNOT00000063853	2470.21	8.03832	4932.37	613.608	9.26117	2.38663e-14	2.37804e-10	Up	0.0763473	44.7971	9:95285592:95302822:1	Ugt1a8
ENSRNOT00000063864	15.9237	0	31.8474	Inf	Inf	0.035169	0.774418	Up	0.000207315	0.253433	11:46208075:46369577:-1	Abi3bp
ENSRNOT00000063865	301.064	524.5	77.6282	0.148004	-2.75629	0.00585124	0.290782	Down	11.257	1.64574	6:136380990:136400810:1	Zfyve21
ENSRNOT00000063951	21410.3	2590.35	40230.3	15.5308	3.95706	8.41631e-05	0.0176548	Up	16.548	254.01	2:78103387:78257134:1	Fam134b
ENSRNOT00000064007	659.225	289.38	1029.07	3.55613	1.83031	0.039531	0.813217	Up	1.82706	6.41115	4:56399494:56438465:-1	Rbm28
ENSRNOT00000064140	683.867	239.14	1128.59	4.71939	2.2386	0.0128176	0.459	Up	1.33849	6.24741	8:118206703:118324188:1	Smarcc1
ENSRNOT00000064160	4192.9	1147.47	7238.33	6.30808	2.6572	0.00257214	0.172005	Up	8.51199	53.0581	1:261389804:261393736:1	Marveld1
ENSRNOT00000064168	15.9237	0	31.8474	Inf	Inf	0.035169	0.774418	Up	5.7415e-05	0.36303	13:84474362:84530031:1	Ildr2
ENSRNOT00000064264	204.776	367.753	41.7998	0.113663	-3.13717	0.00387603	0.219999	Down	2.17596	0.243593	7:97778260:97839668:1	Tbc1d31
ENSRNOT00000064272	1001.23	424.021	1578.44	3.72255	1.89629	0.0292333	0.705687	Up	8.20109	30.1911	1:100971273:100980340:-1	Prmt1
ENSRNOT00000064284	16.0766	32.1533	0	0	#NAME?	0.0340082	0.766456	Down	0.733881	1.11141e-19	10:103670470:103685844:-1	Cd300lf
ENSRNOT00000064305	467.089	68.3257	865.853	12.6724	3.66362	0.000213504	0.0319904	Up	0.645878	8.12513	1:80820050:80835701:-1	PVR
ENSRNOT00000064349	26.3737	0	52.7473	Inf	Inf	0.00865175	0.36528	Up	0.000884369	0.563621	7:63467216:63499353:1	LOC100909505
ENSRNOT00000064395	51.23	99.4742	2.9857	0.0300148	-5.05818	0.00593481	0.293471	Down	0.233802	0.00576523	3:111699087:111759714:1	Mga
ENSRNOT00000064438	1109.61	508.424	1710.81	3.36492	1.75057	0.0422475	0.835329	Up	4.40015	14.6513	1:140584380:140593745:1	Aen
ENSRNOT00000064483	526.224	888.234	164.213	0.184876	-2.43537	0.0084804	0.362171	Down	3.82368	0.69864	14:92342998:92495894:-1	Cobl
ENSRNOT00000064501	1343.55	623.975	2063.12	3.30641	1.72527	0.0436947	0.842116	Up	8.03054	26.2682	1:212578450:212603529:1	Paox
ENSRNOT00000064513	700.92	267.274	1134.57	4.24495	2.08575	0.0195075	0.570845	Up	1.69239	7.10496	7:76199306:76294663:-1	Ncald
ENSRNOT00000064551	22.6078	45.2156	0	0	#NAME?	0.0137315	0.475897	Down	0.136616	1.82232e-10	8:22822412:22874637:-1	Dock6
ENSRNOT00000064572	547.488	860.1	234.875	0.273079	-1.87261	0.0381654	0.797233	Down	6.44838	1.73782	12:22082065:22118220:1	Agfg2
ENSRNOT00000064751	29.1389	58.2778	0	0	#NAME?	0.00610824	0.296168	Down	0.31064	0	11:34052110:34094696:1	Morc3
ENSRNOT00000064841	177.102	303.447	50.7569	0.167268	-2.57977	0.0179589	0.545936	Down	1.57057	0.259164	5:169244778:169288309:1	Plekhg5
ENSRNOT00000065111	458.874	747.564	170.185	0.227653	-2.13509	0.0212105	0.599225	Down	4.60637	1.03503	2:226563050:226679438:1	Bcar3
ENSRNOT00000065145	13.5647	27.1293	0	0	#NAME?	0.0495447	0.890434	Down	0.0908102	3.55189e-13	10:102303714:102423084:-1	Sdk2
ENSRNOT00000065379	28.3641	0	56.7283	Inf	Inf	0.0068018	0.316697	Up	0.000127608	0.325671	7:142397413:142464158:1	Slc4a8
ENSRNOT00000065508	738.939	309.475	1168.4	3.77543	1.91664	0.0302914	0.720155	Up	3.15015	11.7664	19:45938915:45945741:1	Mon1b
ENSRNOT00000065518	667.029	256.221	1077.84	4.20666	2.07268	0.0206564	0.5889	Up	3.61894	15.0258	2:118910587:118916563:1	Zfp639
ENSRNOT00000065529	658.187	1012.83	303.546	0.299701	-1.7384	0.0499097	0.892019	Down	4.42853	1.31093	6:128473570:128567198:-1	Clmn
ENSRNOT00000065633	4901.2	1920.15	7882.24	4.10501	2.03738	0.0184695	0.554307	Up	12.3444	50.0816	10:25903925:25910298:-1	Ccng1
ENSRNOT00000065839	19.091	38.182	0	0	#NAME?	0.0221142	0.612922	Down	1.84214	4.45299e-21	9:4875036:4876023:-1	Sult1c2a
ENSRNOT00000066266	118.581	31.1485	206.013	6.61391	2.7255	0.0243724	0.646689	Up	1.41953	9.24815	20:9850803:9855481:-1	Tff3
ENSRNOT00000066346	1141.62	2006.57	276.675	0.137885	-2.85847	0.00144156	0.120703	Down	29.7222	4.04341	9:98549705:98551410:-1	Hes6
ENSRNOT00000066391	477.352	133.637	821.067	6.14401	2.61918	0.00536674	0.274275	Up	1.07874	6.57683	14:81340146:81361276:1	Nop14
ENSRNOT00000066549	26.3737	0	52.7473	Inf	Inf	0.00865175	0.36528	Up	1.45595e-08	1.13463	5:151089946:151117042:-1	Fam76a
ENSRNOT00000066561	972.283	405.935	1538.63	3.79033	1.92233	0.0274288	0.67565	Up	3.41948	12.8247	5:173660921:173672459:1	Noc2l
ENSRNOT00000066597	131.039	244.164	17.9142	0.0733695	-3.76868	0.00245189	0.166762	Down	8.61464	0.610382	1:189347736:189359730:-1	RGD1559600
ENSRNOT00000066670	4391.68	7161.14	1622.23	0.226532	-2.14221	0.0133044	0.466777	Down	27.1428	6.07723	4:149261044:149273891:1	Cxcl12
ENSRNOT00000066917	114.948	208.996	20.8999	0.100001	-3.32191	0.00826959	0.358003	Down	0.759083	0.0741653	8:108958099:109342731:1	Stag1
ENSRNOT00000067118	17.9142	0	35.8284	Inf	Inf	0.0263705	0.669376	Up	0.00141918	0.230577	6:136398716:136436620:-1	Ppp1r13b
ENSRNOT00000067141	2980.96	1096.23	4865.69	4.43859	2.1501	0.0124293	0.447904	Up	26.4108	115.893	19:53635688:53643964:1	Map1lc3b2
ENSRNOT00000067231	37.1772	74.3545	0	0	#NAME?	0.00235397	0.16238	Down	3.88565	0.00367889	16:61765344:61769456:1	Leprotl1
ENSRNOT00000067384	2277.22	655.123	3899.32	5.95204	2.57339	0.00321716	0.194868	Up	2.07907	12.237	1:239412884:239474931:1	Tmem2
ENSRNOT00000067391	159130	3847.34	314412	81.7219	6.35265	4.51391e-06	0.00179906	Up	207.028	16723.2	19:11307967:11308740:-1	Mt2A
ENSRNOT00000067445	22.3927	0	44.7855	Inf	Inf	0.0143117	0.489028	Up	6.12709e-05	0.552346	13:47421696:47438360:-1	Pfkfb2
ENSRNOT00000067448	44.7998	3.01437	86.5853	28.7242	4.84419	0.010879	0.415465	Up	0.00990523	0.324769	12:1682527:1816414:-1	Insr
ENSRNOT00000067500	56.2307	0	112.461	Inf	Inf	0.000286058	0.0390449	Up	7.98798e-07	3.27747	3:11795679:11799074:1	Tor2a
ENSRNOT00000067574	495.711	959.574	31.8474	0.0331891	-4.91315	2.92204e-06	0.00123894	Down	5.40659	0.179227	5:159755535:159773699:1	Arhgef19
ENSRNOT00000067643	5264.39	8078.51	2450.26	0.303306	-1.72115	0.0448218	0.850085	Down	38.1729	11.4465	1:250426158:250514866:1	A1cf
ENSRNOT00000067650	15.4261	0	30.8522	Inf	Inf	0.0378676	0.796703	Up	1.98295e-12	0.277019	14:33108140:33124169:1	Noa1
ENSRNOT00000067683	59.714	0	119.428	Inf	Inf	0.000198875	0.0304859	Up	8.62966e-33	8.89825	8:115511974:115512246:1	Timm8a1
ENSRNOT00000067688	244.506	37.1772	451.836	12.1536	3.60331	0.000820744	0.082605	Up	0.31077	3.78662	9:42880217:42884855:1	Arid5a
ENSRNOT00000067722	82.6951	19.091	146.299	7.66325	2.93796	0.0308664	0.726465	Up	0.34318	2.57278	2:30327691:30340208:-1	Bdp1
ENSRNOT00000067780	3742.02	1138.43	6345.6	5.57401	2.47872	0.00453246	0.244778	Up	13.1284	72.3111	19:26092974:26094756:-1	Junb
ENSRNOT00000067843	15290.2	25199.1	5381.22	0.213548	-2.22737	0.0150667	0.503772	Down	285.697	60.3017	2:264266984:264293046:-1	Cth
ENSRNOT00000067889	25.8761	0	51.7521	Inf	Inf	0.00919616	0.375477	Up	2.87992e-08	0.487354	1:140845479:140860882:-1	Mfge8
ENSRNOT00000067931	190.116	319.523	60.7092	0.189999	-2.39593	0.0245868	0.646689	Down	0.936026	0.176744	4:145704779:146016325:-1	Atp2b2
ENSRNOT00000068078	12543.4	2722.98	22363.9	8.21301	3.03791	0.00116965	0.105213	Up	48.0902	390.374	X:43626480:43629765:1	Sat1
ENSRNOT00000068148	524.515	215.025	834.005	3.87864	1.95555	0.0314946	0.732589	Up	1.3857	5.32285	13:67672878:67688477:-1	Prg4
ENSRNOT00000068177	85.8092	150.719	20.8999	0.138668	-2.85029	0.0332812	0.758843	Down	1.02022	0.141361	16:23475351:23781604:1	Psd3
ENSRNOT00000068183	72.8377	143.685	1.99047	0.013853	-6.17366	0.000484157	0.0560947	Down	0.637633	0.0107773	1:200590953:200696928:-1	Fgfr2
ENSRNOT00000068184	7689.74	2212.55	13166.9	5.95103	2.57314	0.00410575	0.227909	Up	10.3812	61.0791	20:32213148:32232632:-1	Ddx21
ENSRNOT00000068197	1404.68	607.898	2201.45	3.62142	1.85656	0.0304281	0.720155	Up	2.59095	9.26914	7:12471824:12515699:1	Sbno2
ENSRNOT00000068711	1418.21	627.994	2208.42	3.51663	1.81419	0.0341328	0.767719	Up	5.0366	17.5168	11:87677966:87718805:1	Klhl22
ENSRNOT00000070825	1169.15	365.744	1972.55	5.39326	2.43116	0.00577915	0.288639	Up	1.1682	6.22982	17:66446569:66486500:1	Heatr1
ENSRNOT00000070878	38.8284	3.01437	74.6425	24.7622	4.63007	0.0189596	0.562513	Up	0.194217	4.30474	3:19045214:19045737:1	AABR07051670.1
ENSRNOT00000070886	154.486	47.2251	261.746	5.54252	2.47054	0.0272367	0.674496	Up	0.88056	4.84619	20:5240975:5244386:-1	RT1-DMa
ENSRNOT00000070912	1301.79	215.025	2388.56	11.1083	3.47356	0.000153596	0.0262074	Up	1.22054	13.4202	3:109862120:109873466:1	Thbs1
ENSRNOT00000071074	24.115	48.2299	0	0	#NAME?	0.0113014	0.423336	Down	0.3476	0.00352284	12:44536293:44911147:-1	Ksr2
ENSRNOT00000071109	1113.83	1917.14	310.513	0.161967	-2.62623	0.00314839	0.19223	Down	25.0902	4.01027	1:219329574:219335043:1	Cabp2
ENSRNOT00000071195	628.856	1018.86	238.856	0.234435	-2.09274	0.0200686	0.58041	Down	6.98135	1.61507	2:257005829:257038105:-1	Ptgfr
ENSRNOT00000071200	280.705	533.544	27.8665	0.0522291	-4.259	9.41266e-05	0.0192907	Down	4.92565	0.257899	9:95161157:95302822:1	Ugt1a8
ENSRNOT00000071239	16.919	0	33.8379	Inf	Inf	0.0303959	0.720155	Up	3.74599e-31	0.964493	1:86873253:86888958:1	Fbxo27
ENSRNOT00000071325	16.0766	32.1533	0	0	#NAME?	0.0340082	0.766456	Down	0.236937	4.39727e-06	12:22435701:22450871:1	Slc12a9
ENSRNOT00000071388	780.245	1356.47	204.023	0.150407	-2.73305	0.00265557	0.174654	Down	9.29501	1.38302	13:36257112:36290531:-1	Steap3
ENSRNOT00000071447	101.886	182.872	20.8999	0.114287	-3.12927	0.0152034	0.506646	Down	5.51468	0.630162	4:117567668:117568348:-1	Cml2
ENSRNOT00000071528	14.4309	0	28.8618	Inf	Inf	0.0439502	0.844428	Up	0.00122003	0.667103	1:214389255:214394411:-1	Pddc1
ENSRNOT00000071612	241.15	482.299	0	0	#NAME?	1.84912e-09	2.30308e-06	Down	7.9039	7.02737e-07	18:55391388:55392641:1	RGD1309362
ENSRNOT00000071663	29.1389	58.2778	0	0	#NAME?	0.00610824	0.296168	Down	0.892497	0.00149989	20:28722580:28783589:-1	2019-09-10
ENSRNOT00000071707	83.9	167.8	0	0	#NAME?	1.92596e-05	0.00538743	Down	1.13448	8.20752e-11	11:82862695:82876051:1	LOC100912455
ENSRNOT00000071758	13.5647	27.1293	0	0	#NAME?	0.0495447	0.890434	Down	0.397411	0.00662363	1:38582629:38586563:-1	LOC501406
ENSRNOT00000071829	1169.15	365.744	1972.55	5.39326	2.43116	0.00577915	0.288639	Up	1.1682	6.22982	17:66579319:66619250:1	Heatr1
ENSRNOT00000071891	138.036	41.1964	234.875	5.70135	2.5113	0.0292626	0.705687	Up	0.50136	2.84252	1:220307394:220314035:1	Slc29a2
ENSRNOT00000072129	1344.23	557.658	2130.79	3.82096	1.93394	0.0246973	0.647076	Up	3.19167	12.0565	12:6930018:6956914:-1	Uspl1
ENSRNOT00000072130	33.3403	0	66.6806	Inf	Inf	0.00376387	0.216726	Up	0.000376779	0.585021	3:110835683:110840068:1	LOC100911166
ENSRNOT00000072160	310.115	125.599	494.631	3.93818	1.97753	0.0405743	0.817785	Up	1.02244	3.96058	9:85387065:85445939:-1	Ap1s3
ENSRNOT00000072188	12481.2	20292.7	4669.63	0.230113	-2.11958	0.0188725	0.561331	Down	241.524	54.9335	1:248723397:248729962:1	LOC100911854
ENSRNOT00000072653	33.1581	66.3161	0	0	#NAME?	0.00378466	0.216726	Down	1.01203	1.70281e-07	12:21931413:21950085:1	AABR07035776.1
ENSRNOT00000072696	770.604	1212.78	328.427	0.270805	-1.88468	0.0325159	0.748241	Down	58.1035	15.5769	20:14101656:14102901:1	Gucd1
ENSRNOT00000072698	122.948	217.035	28.8618	0.132982	-2.91069	0.0160768	0.517576	Down	4.4695	0.581334	4:58053041:58063138:1	Mest
ENSRNOT00000072762	815.778	352.681	1278.87	3.62615	1.85844	0.0342536	0.7687	Up	1.09668	3.93143	1:88324339:88336407:1	LOC102547059
ENSRNOT00000072778	758.38	212.011	1304.75	6.15417	2.62156	0.00384459	0.219527	Up	1.65034	10.0455	16:6064288:6072740:-1	Il17rb
ENSRNOT00000072849	2539.96	4316.58	763.344	0.17684	-2.49948	0.00409832	0.227909	Down	52.8725	9.24655	2:8732932:8743069:1	Arrdc3
ENSRNOT00000072864	341.667	586.797	96.5376	0.164516	-2.6037	0.00766332	0.338614	Down	4.44427	0.723041	5:154552195:154594785:1	Asap3
ENSRNOT00000072868	59.714	0	119.428	Inf	Inf	0.000198875	0.0304859	Up	3.20922e-09	0.870706	9:10450426:10471009:-1	Safb
ENSRNOT00000072869	547.779	921.392	174.166	0.189024	-2.40335	0.00904984	0.374938	Down	4.3721	0.818071	5:58855773:58882096:1	Rusc2
ENSRNOT00000073000	1405.88	2220.59	591.168	0.266222	-1.9093	0.0262656	0.669336	Down	32.505	8.56096	9:9988057:10001962:1	Slc25a23
ENSRNOT00000073003	331.546	132.632	530.459	3.99947	1.99981	0.0367773	0.788911	Up	1.4141	5.57193	1:188556352:188572141:-1	Knop1
ENSRNOT00000073035	303.536	102.489	504.583	4.92331	2.29963	0.0189687	0.562513	Up	0.454972	2.22092	17:14565794:14589154:-1	Nol8
ENSRNOT00000073049	167.604	294.403	40.8045	0.138601	-2.85099	0.0106927	0.411438	Down	3.08277	0.423333	11:90403333:90406797:-1	Snai2
ENSRNOT00000073188	149.475	249.188	49.7616	0.199695	-2.32413	0.0380832	0.796955	Down	12.4408	2.46397	17:43814773:43815183:-1	Hist1h2ail1
ENSRNOT00000073193	1955.27	341.629	3568.9	10.4467	3.38498	0.0001852	0.0294135	Up	1.61386	16.6511	1:261106760:261140389:-1	Rrp12
ENSRNOT00000073241	733.586	230.097	1237.07	5.37632	2.42662	0.00712256	0.324802	Up	2.66392	14.1638	1:282640706:282648156:1	Ces2
ENSRNOT00000073304	17.0814	34.1629	0	0	#NAME?	0.0293562	0.705687	Down	1.98615	0.022915	6:138631604:138631997:-1	AABR07065651.3
ENSRNOT00000073341	60.2116	0	120.423	Inf	Inf	0.000188939	0.0296471	Up	0.000205198	1.24586	4:156985046:157008947:-1	LOC103690024
ENSRNOT00000073675	61.7331	6.02874	117.437	19.4796	4.28389	0.00838148	0.35997	Up	0.165907	3.43294	10:17209212:17272629:1	Sh3pxd2b
ENSRNOT00000073710	414.788	685.267	144.309	0.210588	-2.24751	0.0168545	0.528108	Down	1.12755	0.23432	2:22646712:22744407:-1	Cmya5
ENSRNOT00000073892	16.0766	32.1533	0	0	#NAME?	0.0340082	0.766456	Down	0.130933	0.00149923	14:91905919:91979500:-1	Ddc
ENSRNOT00000073910	3415.65	1571.49	5259.81	3.34701	1.74287	0.0403168	0.817785	Up	18.0336	59.669	6:60132024:60151420:-1	Ifrd1
ENSRNOT00000073951	22383.2	5740.37	39026.1	6.79853	2.76522	0.00389702	0.219999	Up	86.1909	579.209	7:143629455:143633131:1	Krt18
ENSRNOT00000073952	38.182	76.364	0	0	#NAME?	0.00209291	0.151392	Down	0.972679	8.72947e-08	18:35489274:35671676:1	Dcp2
ENSRNOT00000074081	2074.36	794.789	3353.93	4.21991	2.07721	0.0154736	0.509624	Up	17.181	71.6565	20:10396621:10407554:-1	U2af1
ENSRNOT00000074146	645.675	265.265	1026.09	3.86816	1.95165	0.0290295	0.705589	Up	14.4224	55.1512	17:57074570:57088306:1	Crem
ENSRNOT00000074209	10884.8	3225.38	18544.2	5.74946	2.52343	0.005543	0.281071	Up	14.676	83.4128	2:235738416:235760352:1	Etnppl
ENSRNOT00000074226	550.99	864.119	237.861	0.275264	-1.86111	0.0391852	0.812071	Down	3.92931	1.06719	18:47500330:47513065:-1	Lox
ENSRNOT00000074261	60.7563	114.546	6.96663	0.0608195	-4.03932	0.011944	0.435799	Down	0.855976	0.0516175	20:5198258:5212624:-1	LOC103689996
ENSRNOT00000074299	1132.26	456.175	1808.34	3.96414	1.98701	0.0220371	0.612489	Up	1.42927	5.60498	1:87903783:87915794:1	Zfp84
ENSRNOT00000074301	63.6949	0	127.39	Inf	Inf	0.000132617	0.0233875	Up	4.77773e-09	1.60247	1:88451958:88453578:1	LOC102549115
ENSRNOT00000074352	342.433	538.567	146.299	0.271645	-1.8802	0.0477237	0.875726	Down	4.5798	1.23142	1:73610149:73619356:-1	Lilrb3
ENSRNOT00000074389	2625.46	1263.02	3987.9	3.15743	1.65875	0.0499084	0.892019	Up	8.67094	27.0515	17:63110254:63145577:-1	Gtpbp4
ENSRNOT00000074449	2706.05	1049	4363.1	4.15929	2.05634	0.0163982	0.521622	Up	16.6723	68.5665	16:72401887:72403179:1	LOC100910163
ENSRNOT00000074486	23.1102	46.2203	0	0	#NAME?	0.0128589	0.459	Down	0.391885	2.2306e-05	X:124321551:124323960:1	Zbtb33
ENSRNOT00000074586	526.367	185.886	866.848	4.66333	2.22136	0.0154855	0.509624	Up	3.35238	15.4582	11:89008008:89009146:1	Cebpd
ENSRNOT00000074617	74.8043	138.661	10.9476	0.078952	-3.66288	0.0122545	0.443207	Down	3.3007	0.249637	11:79547699:79548560:1	LOC100365839
ENSRNOT00000074667	769.031	254.212	1283.85	5.05032	2.33637	0.00911317	0.375477	Up	1.28233	6.39868	17:15405995:15429051:-1	Nol8
ENSRNOT00000074676	25.8856	2.00958	49.7616	24.7622	4.63007	0.0425753	0.835329	Up	0.00805552	0.244589	X:114373907:114378622:1	Rgag1
ENSRNOT00000074735	20.0958	40.1916	0	0	#NAME?	0.0192491	0.565777	Down	0.687008	0.000856497	12:21987896:21989339:-1	Ppp1r35
ENSRNOT00000074738	581.052	907.325	254.78	0.280803	-1.83237	0.0412283	0.822419	Down	14.6241	4.06365	15:38647779:38709984:-1	Phf11b
ENSRNOT00000074874	737.528	222.059	1253	5.64265	2.49637	0.00574965	0.288639	Up	1.63763	9.11694	14:2463643:2474780:-1	LOC100910207
ENSRNOT00000074985	45.2831	0	90.5662	Inf	Inf	0.000944224	0.0917878	Up	2.48541e-09	1.87658	1:81328183:81344705:1	Plaur
ENSRNOT00000075035	1177.74	2067.86	287.622	0.139092	-2.84589	0.00148411	0.122765	Down	23.3241	3.20379	1:189940291:189942112:1	Anks4b
ENSRNOT00000075065	304.576	530.529	78.6234	0.148198	-2.7544	0.00579896	0.288904	Down	34.9822	5.13628	17:43617247:43617558:1	Hist1h4b
ENSRNOT00000075073	18.4118	0	36.8236	Inf	Inf	0.0245981	0.646689	Up	0.00201145	0.983418	10:47785033:47792590:1	LOC100911746
ENSRNOT00000075167	76.1879	11.0527	141.323	12.7863	3.67653	0.0115304	0.429491	Up	0.234039	2.90435	1:81328183:81344708:1	Plaur
ENSRNOT00000075181	87.0972	3.01437	171.18	56.788	5.82751	0.000316132	0.0411757	Up	0.0417225	2.32651	2:213420314:213421811:-1	LOC100911617
ENSRNOT00000075283	1036.85	485.314	1588.39	3.27292	1.71058	0.0475459	0.874073	Up	3.70306	11.9808	18:25637588:25665455:1	Wdr36
ENSRNOT00000075363	17.0814	34.1629	0	0	#NAME?	0.0293562	0.705687	Down	1.98615	0.022915	6:138900522:138900915:-1	AABR07065656.3
ENSRNOT00000075400	53.2539	106.508	0	0	#NAME?	0.000384468	0.047588	Down	3.10563	0	4:97657671:97760102:1	Gng12
ENSRNOT00000075464	866.36	2.00958	1730.71	861.23	9.75025	4.56172e-13	2.27265e-09	Up	0.0421191	31.6802	5:137458691:137463255:1	LOC100912375
ENSRNOT00000075476	231.389	417.993	44.7855	0.107144	-3.22237	0.00251202	0.169693	Down	4.31831	0.459465	8:62946732:62948720:-1	Islr
ENSRNOT00000075493	3582.48	1388.62	5776.33	4.15976	2.0565	0.0166951	0.527659	Up	39.4646	162.328	2:93981656:93985378:-1	Fabp5
ENSRNOT00000075589	138.661	277.322	0	0	#NAME?	3.07615e-07	0.000175147	Down	3.82579	0.00509595	7:15198967:15225309:-1	Cyp4f6
ENSRNOT00000075680	953.189	1518.24	388.141	0.255652	-1.96775	0.0243235	0.646689	Down	9.86223	2.49554	1:257614731:257657252:1	LOC100911660
ENSRNOT00000075799	3717.19	0	7434.39	Inf	Inf	5.86134e-19	1.16805e-14	Up	2.60239e-06	34.1824	4:154423209:154472924:1	A2m
ENSRNOT00000075800	1019.15	426.031	1612.28	3.78441	1.92007	0.0272642	0.674496	Up	1.95891	7.33479	20:28815039:28819505:1	Sowahc
ENSRNOT00000075813	128.451	223.063	33.8379	0.151696	-2.72074	0.0216147	0.606674	Down	6.71845	0.995575	4:117574474:117575154:-1	LOC102556148
ENSRNOT00000075863	59.714	0	119.428	Inf	Inf	0.000198875	0.0304859	Up	8.41831e-08	2.07043	14:81819459:81830780:1	Mxd4
ENSRNOT00000075873	15.0719	30.1437	0	0	#NAME?	0.0395043	0.813217	Down	0.82127	8.37418e-06	7:116356330:116359164:1	Ly6e
ENSRNOT00000075948	20.4023	0	40.8045	Inf	Inf	0.0186892	0.557487	Up	1.35059e-05	1.45492	13:82739406:82753438:-1	Atp1b1
ENSRNOT00000075962	39.3404	6.02874	72.652	12.0509	3.59107	0.0491781	0.890434	Up	0.0802068	0.997708	4:14071507:14109104:1	RGD1565355
ENSRNOT00000075987	19.407	0	38.8141	Inf	Inf	0.0214238	0.603014	Up	0.00267222	1.10259	12:11232964:11240399:-1	Bud31
ENSRNOT00000076061	37.1629	71.3401	2.9857	0.0418516	-4.57857	0.0218005	0.60676	Down	1.49183	0.0553638	2:30666475:30668185:1	Taf9
ENSRNOT00000076072	192.145	327.562	56.7283	0.173184	-2.52963	0.0180278	0.546602	Down	3.2718	0.562459	13:50481165:50497466:-1	Etnk2
ENSRNOT00000076230	68.766	124.594	12.938	0.103842	-3.26754	0.0262398	0.669336	Down	0.732231	0.0746702	2:11658568:11820093:1	Mef2c
ENSRNOT00000076248	81.1115	0	162.223	Inf	Inf	2.53839e-05	0.00674467	Up	0.000148737	1.30434	9:50925619:50955882:1	Ercc5
ENSRNOT00000076277	14.9285	0	29.857	Inf	Inf	0.0407908	0.817785	Up	4.82193e-10	1.02141	11:61511969:61530567:-1	Naa50
ENSRNOT00000076349	33.8523	3.01437	64.6901	21.4606	4.42362	0.0303311	0.720155	Up	0.0520799	1.24868	4:14109864:14113255:1	RGD1565355
ENSRNOT00000076417	50.2108	94.4503	5.9714	0.0632227	-3.98341	0.0200965	0.58041	Down	2.97503	0.191865	13:79886984:79888534:1	Pigc
ENSRNOT00000076499	18.4118	0	36.8236	Inf	Inf	0.0245981	0.646689	Up	5.06711e-11	0.960972	1:167336718:167347490:-1	Rhog
ENSRNOT00000076557	468.945	144.69	793.201	5.48208	2.45472	0.00873095	0.367844	Up	0.880057	4.78085	4:150443667:150471834:-1	Bms1
ENSRNOT00000076583	37.8188	0	75.6377	Inf	Inf	0.00222194	0.156462	Up	3.11317e-11	1.85505	4:8217556:8255379:-1	Kmt2e
ENSRNOT00000076596	203.888	76.364	331.413	4.3399	2.11766	0.0417358	0.829223	Up	0.437552	1.8772	10:70157624:70220582:-1	Rffl
ENSRNOT00000076633	39.6749	76.364	2.9857	0.0390982	-4.67675	0.0172062	0.533258	Down	1.64031	0.0533707	4:8217556:8255514:-1	Kmt2e
ENSRNOT00000076722	3417.45	5508.26	1326.65	0.240847	-2.05381	0.0167494	0.527659	Down	35.6145	8.47698	13:82552586:82566586:1	Slc19a2
ENSRNOT00000076791	22.603	44.2108	0.995233	0.0225111	-5.47322	0.0342148	0.768696	Down	1.59974	0.048967	5:77722817:77725867:-1	Rn50_5_0814.4
ENSRNOT00000076802	149.017	48.2299	249.803	5.17943	2.37279	0.0347475	0.773685	Up	0.442061	2.2627	1:252914684:252922486:-1	Ifit1bl
ENSRNOT00000076833	49.7275	97.4646	1.99047	0.0204224	-5.6137	0.00389602	0.219999	Down	0.285442	0.00609276	3:163787101:163847671:-1	Znfx1
ENSRNOT00000076889	42.8093	3.01437	82.6043	27.4035	4.77629	0.0130768	0.4629	Up	0.137681	3.80452	5:74786480:74837583:1	Rn50_5_0791.1
ENSRNOT00000076924	7768.85	12882.4	2655.28	0.206117	-2.27847	0.01021	0.399546	Down	120.42	24.5365	13:50481163:50499140:-1	Etnk2
ENSRNOT00000076976	992.297	429.045	1555.55	3.6256	1.85822	0.0324911	0.748241	Up	13.2313	47.3852	2:154580558:154590662:1	Gmps
ENSRNOT00000077049	101.981	202.968	0.995233	0.00490341	-7.672	1.8493e-05	0.00534397	Down	0.741762	0.00375935	1:133326107:133503194:-1	Mctp2
ENSRNOT00000077071	603.904	271.293	936.514	3.45204	1.78745	0.0454954	0.858554	Up	0.526071	1.7961	8:87040799:87158368:-1	Col12a1
ENSRNOT00000077107	18.5886	37.1772	0	0	#NAME?	0.0237169	0.64042	Down	0.198183	3.18779e-06	10:59539405:59711874:1	Itgae
ENSRNOT00000077110	62.2068	1.00479	123.409	122.821	6.94041	0.000549541	0.0611802	Up	0.00746686	0.900638	17:34704664:34840939:1	Exoc2
ENSRNOT00000077177	14165.5	4268.35	24062.7	5.63748	2.49505	0.00677718	0.31629	Up	57.42	319.972	14:87448692:87453785:1	Igfbp1
ENSRNOT00000077197	98.1451	24.115	172.175	7.13977	2.83588	0.0272856	0.674496	Up	0.179627	1.26438	15:48422918:48445588:-1	Extl3
ENSRNOT00000077303	54.2832	9.04311	99.5233	11.0054	3.46014	0.0319978	0.740594	Up	0.0368233	0.381061	9:47225585:47258503:1	Il18rap
ENSRNOT00000077401	29.3737	3.01437	55.733	18.4891	4.2086	0.0464193	0.863719	Up	0.0170757	0.293212	2:47000323:47096961:-1	Itga2
ENSRNOT00000077408	333.964	536.558	131.371	0.24484	-2.03009	0.0340243	0.766456	Down	6.41829	1.55408	1:224319077:224389389:-1	UST4r
ENSRNOT00000077479	3298.42	674.214	5922.63	8.78449	3.13496	0.000464085	0.054678	Up	3.29163	28.5677	1:129766100:129780356:-1	Arrdc4
ENSRNOT00000077619	54.7228	101.484	7.96186	0.0784545	-3.672	0.0241795	0.646689	Down	1.47982	0.120328	4:181103774:181214994:1	Arntl2
ENSRNOT00000077677	16.919	0	33.8379	Inf	Inf	0.0303959	0.720155	Up	0.0020648	0.216938	7:120000021:120026755:-1	Card10
ENSRNOT00000077711	418.759	683.257	154.261	0.225773	-2.14705	0.0217897	0.60676	Down	7.72879	1.72167	12:22082057:22117130:1	Agfg2
ENSRNOT00000077727	932.714	142.68	1722.75	12.0742	3.59385	0.00012356	0.0230339	Up	1.69343	20.2586	11:64882288:64919579:1	Pla1a
ENSRNOT00000077770	56.2682	112.536	0	0	#NAME?	0.000278692	0.0388375	Down	1.03832	3.88976e-09	6:135680615:135715273:1	Traf3
ENSRNOT00000077803	201.097	326.557	75.6377	0.231622	-2.11016	0.042936	0.837209	Down	2.20113	0.500493	12:37677019:37699616:-1	LOC100910427
ENSRNOT00000077856	479.137	90.4311	867.843	9.59673	3.26254	0.000749361	0.0781847	Up	1.15885	10.9574	7:140349138:140356209:-1	Rnd1
ENSRNOT00000078072	623.139	967.613	278.665	0.287992	-1.7959	0.0440231	0.844428	Down	3.95831	1.12765	11:82745735:82783328:-1	Map3k13
ENSRNOT00000078074	183.749	27.1293	340.37	12.5462	3.64918	0.00137461	0.116073	Up	0.41247	5.1124	2:235250454:235257731:-1	Gar1
ENSRNOT00000078161	194.678	23.1102	366.246	15.8478	3.98621	0.000515909	0.059428	Up	0.348593	5.5582	8:13861459:13867749:1	Taf1d
ENSRNOT00000078166	14.9285	0	29.857	Inf	Inf	0.0407908	0.817785	Up	7.42777e-08	0.406943	17:14541949:14557792:-1	LOC103690033
ENSRNOT00000078263	32.8427	0	65.6854	Inf	Inf	0.00399298	0.22478	Up	1.45918e-06	0.645598	13:99136871:99152038:1	Sde2
ENSRNOT00000078393	71.3066	135.647	6.96663	0.0513587	-4.28325	0.00557047	0.281108	Down	2.16633	0.107435	1:222169491:222177421:-1	Esrra
ENSRNOT00000078532	936.221	252.202	1620.24	6.42436	2.68355	0.00282198	0.182076	Up	6.09011	38.6303	17:67899033:67904674:-1	Klf6
ENSRNOT00000078599	40.3213	3.01437	77.6282	25.7527	4.68665	0.0164858	0.523135	Up	0.0366747	0.861131	13:51022681:51030802:1	Chi3l1
ENSRNOT00000078610	38.6653	73.3497	3.98093	0.0542733	-4.20361	0.0280228	0.685199	Down	0.662478	0.0342259	2:178586184:178616719:-1	Tmem144
ENSRNOT00000078692	108.978	0	217.956	Inf	Inf	2.54161e-06	0.00112554	Up	1.98981e-22	1.775	1:102777296:102826965:-1	Hps5
ENSRNOT00000078707	213.657	351.677	75.6377	0.215077	-2.21707	0.0321276	0.742737	Down	3.75884	0.800589	1:128614138:128687893:1	Ttc23
ENSRNOT00000078725	21.3975	0	42.795	Inf	Inf	0.0163358	0.521622	Up	0	0.913532	4:156270920:156276304:-1	Clec4e
ENSRNOT00000078906	1371.14	356.7	2385.57	6.68789	2.74155	0.0019968	0.147379	Up	1.24539	8.23372	17:66446162:66613839:1	Heatr1
ENSRNOT00000078977	1103.87	346.653	1861.09	5.36873	2.42458	0.00601457	0.295736	Up	4.16431	22.0766	8:94258198:94368834:-1	Me1
ENSRNOT00000079011	274.067	79.3784	468.755	5.90532	2.56201	0.0108632	0.415465	Up	0.758964	4.44296	7:141889444:141924785:1	Atf1
ENSRNOT00000079021	24.8808	0	49.7616	Inf	Inf	0.010404	0.404152	Up	8.50399e-05	1.74649	20:2088681:2092433:1	Znrd1
ENSRNOT00000079080	29.3641	1.00479	57.7235	57.4483	5.84419	0.0162205	0.520519	Up	0.00353817	0.375265	10:105500290:105504393:1	Sphk1
ENSRNOT00000079116	172.518	281.341	63.6949	0.226397	-2.14307	0.0465983	0.865752	Down	1.66198	0.371778	13:50749514:50755046:-1	Prelp
ENSRNOT00000079157	45.1869	84.4024	5.9714	0.0707492	-3.82114	0.0300545	0.718136	Down	0.991423	0.0722971	16:33373615:33375716:1	AABR07025316.1
ENSRNOT00000079177	171.566	290.384	52.7473	0.181647	-2.46079	0.0242325	0.646689	Down	1.90975	0.342585	12:44966119:44999074:-1	Vsig10
ENSRNOT00000079185	1837.74	741.535	2933.95	3.95658	1.98426	0.0205101	0.588095	Up	4.19506	16.4058	6:42852683:42859927:1	Odc1
ENSRNOT00000079227	382.236	14.0671	750.406	53.3449	5.73728	4.55722e-07	0.000227041	Up	0.134965	7.04182	1:250692135:250774105:-1	Sgms1
ENSRNOT00000079310	54888.5	17359.8	92417.3	5.32365	2.41242	0.0182671	0.551014	Up	187.706	987.766	3:75643054:75644954:1	LOC100361457
ENSRNOT00000079355	356.692	606.893	106.49	0.175467	-2.51073	0.00944311	0.37987	Down	7.54442	1.31334	13:89586283:89591277:1	Nr1i3
ENSRNOT00000079365	82.8665	159.762	5.9714	0.0373769	-4.74171	0.00176437	0.136811	Down	2.37736	0.0810089	X:33895769:34057399:1	Reps2
ENSRNOT00000079420	36.8475	5.02395	68.6711	13.6687	3.77281	0.046049	0.860054	Up	0.293275	4.05687	6:138564976:138565404:-1	AABR07065645.2
ENSRNOT00000079455	90.5662	0	181.132	Inf	Inf	1.11318e-05	0.00341283	Up	5.55469e-07	3.52264	2:78391921:78399987:1	LOC103689968
ENSRNOT00000079606	26.3832	2.00958	50.7569	25.2575	4.65864	0.0404371	0.817785	Up	0.0672357	1.65409	3:112370057:112371664:-1	LOC100910478
ENSRNOT00000079646	309.967	94.4503	525.483	5.56359	2.47602	0.0118784	0.435799	Up	1.24548	6.84004	10:25903911:25910325:-1	Ccng1
ENSRNOT00000079655	68.1973	5.02395	131.371	26.1489	4.70868	0.00358191	0.209942	Up	0.0348498	0.993709	1:105113658:105200470:1	Prmt3
ENSRNOT00000079696	18.0862	36.1724	0	0	#NAME?	0.0254442	0.659239	Down	0.390194	0.000494625	10:67559566:67639679:1	Rhot1
ENSRNOT00000079732	35.1581	68.3257	1.99047	0.029132	-5.10125	0.0163574	0.521622	Down	0.331713	0.008338	5:145145983:145186357:1	Zmym6
ENSRNOT00000079760	1251.23	2035.7	466.764	0.229289	-2.12476	0.0144461	0.489028	Down	16.0222	3.62862	19:50207980:50220455:-1	Sdr42e1
ENSRNOT00000079767	933.67	343.638	1523.7	4.43403	2.14862	0.0146466	0.493103	Up	4.16227	18.218	14:11198896:11202325:1	Hnrnpdl
ENSRNOT00000079909	56.2307	0	112.461	Inf	Inf	0.000286058	0.0390449	Up	1.60235e-09	0.839448	X:22342308:22348233:1	Kdm5c
ENSRNOT00000079926	72.1878	7.03353	137.342	19.5268	4.28738	0.00536769	0.274275	Up	0.0464903	0.918535	10:61705343:61744976:-1	Sgsm2
ENSRNOT00000079941	87.4167	174.833	0	0	#NAME?	1.41606e-05	0.00427565	Down	6.59719	8.684e-07	scaffold:Rnor_6.0:KL568423.1:501:1430:1	LOC103694879
ENSRNOT00000079985	2331.96	1073.12	3590.8	3.34614	1.7425	0.0399185	0.816312	Up	23.71	78.4492	scaffold:Rnor_6.0:AABR07024291.1:113521:132313:1	Ppp2ca
ENSRNOT00000080096	101.886	182.872	20.8999	0.114287	-3.12927	0.0152034	0.506646	Down	5.51468	0.630162	4:117750649:117751329:-1	LOC100910829
ENSRNOT00000080124	369.151	610.912	127.39	0.208524	-2.26172	0.0177179	0.540707	Down	2.60682	0.538422	1:244615821:244781633:1	Smarca2
ENSRNOT00000080152	66.1878	1.00479	131.371	130.744	7.03061	0.000378535	0.0471465	Up	0.00582044	1.33683	7:125189827:125275977:1	Parvb
ENSRNOT00000080203	1393.69	2273.84	513.54	0.225847	-2.14658	0.0132258	0.465549	Down	37.0428	8.2674	20:13760822:13764467:1	Gstt2
ENSRNOT00000080410	20.9047	1.00479	40.8045	40.61	5.34376	0.0425141	0.835329	Up	0.00458371	0.32932	4:179259308:179339795:-1	Bcat1
ENSRNOT00000080418	1382.15	474.261	2290.03	4.82863	2.27161	0.00907095	0.375033	Up	3.10289	14.8151	12:40630817:40680397:-1	Naa25
ENSRNOT00000080562	385.485	69.3305	701.639	10.1202	3.33917	0.000788911	0.0802113	Up	1.09298	10.8863	11:81424252:81444490:-1	Kng1l1
ENSRNOT00000080598	42.3261	6.02874	78.6234	13.0414	3.70503	0.0385839	0.804289	Up	0.087289	1.14448	7:53630661:53649310:1	Csrp2
ENSRNOT00000080608	1091.88	1906.09	277.67	0.145675	-2.77917	0.00191864	0.144828	Down	9.07188	1.30605	8:81863619:81941536:1	Fam214a
ENSRNOT00000080654	172.078	293.399	50.7569	0.172996	-2.53119	0.0207533	0.590818	Down	1.43016	0.246003	4:78067689:78074906:-1	Zfp467
ENSRNOT00000080689	46.7227	93.4455	0	0	#NAME?	0.000787804	0.0802113	Down	1.05545	5.10342e-16	1:243375981:243398527:1	Kank1
ENSRNOT00000080734	237.511	31.1485	443.874	14.2503	3.83292	0.000469172	0.054678	Up	0.292747	4.1075	4:123467549:123510217:-1	Slc41a3
ENSRNOT00000080786	107.886	188.901	26.8713	0.142251	-2.81349	0.0241791	0.646689	Down	1.82073	0.261003	2:60131776:60308152:1	Prlr
ENSRNOT00000080812	34.3451	2.00958	66.6806	33.1814	5.0523	0.0180482	0.546602	Up	0.0128801	0.553567	18:40082717:40123420:-1	Trim36
ENSRNOT00000080844	16.579	33.1581	0	0	#NAME?	0.0315832	0.732589	Down	0.41404	1.52506e-11	18:65388685:65507590:1	Tcf4
ENSRNOT00000080887	1622.46	571.726	2673.2	4.67566	2.22517	0.0101495	0.398933	Up	4.94163	22.8186	X:156274800:156293926:1	G6pd
ENSRNOT00000080899	28.6365	57.273	0	0	#NAME?	0.00648652	0.308505	Down	2.04596	1.47748e-05	5:50230633:50239437:-1	Smim8
ENSRNOT00000080988	3276.42	1488.09	5064.74	3.40351	1.76702	0.0376621	0.796703	Up	21.2088	71.3609	1:198228387:198232344:-1	Aldoa
ENSRNOT00000080995	410.093	116.556	703.63	6.03686	2.5938	0.00659668	0.312253	Up	1.20805	7.22393	1:282640722:282702424:1	Ces2
ENSRNOT00000081021	183.429	64.3066	302.551	4.70482	2.23414	0.0362608	0.784335	Up	0.0883351	0.413177	7:117230321:117257402:-1	Plec
ENSRNOT00000081061	146.039	259.236	32.8427	0.12669	-2.98062	0.0102252	0.399546	Down	2.29855	0.288979	X:53360839:53517142:1	Dmd
ENSRNOT00000081106	24.115	48.2299	0	0	#NAME?	0.0113014	0.423336	Down	1.2308	7.47076e-07	9:81615251:81632360:1	Pnkd
ENSRNOT00000081145	48.7275	96.4598	0.995233	0.0103176	-6.59875	0.00203356	0.148988	Down	1.46456	0.0193597	8:32188617:32214469:1	Zbtb44
ENSRNOT00000081201	33.6509	65.3114	1.99047	0.0304766	-5.03616	0.0190467	0.563151	Down	0.694361	0.0224579	4:118484788:118534266:-1	Gmcl1
ENSRNOT00000081239	29.3737	3.01437	55.733	18.4891	4.2086	0.0464193	0.863719	Up	0.0333186	0.722232	X:23092159:23144324:-1	Pfkfb1
ENSRNOT00000081312	235.812	92.4407	379.184	4.10191	2.0363	0.0437524	0.842414	Up	0.798764	3.23574	19:38190866:38237308:1	Prmt7
ENSRNOT00000081348	735.074	229.092	1241.06	5.41728	2.43757	0.00688428	0.317815	Up	1.93079	10.349	10:84628424:84639105:-1	Snx11
ENSRNOT00000081353	871.339	316.509	1426.17	4.50594	2.17183	0.014028	0.482816	Up	3.42393	15.2624	8:116324040:116328978:1	Hyal2
ENSRNOT00000081373	18.4118	0	36.8236	Inf	Inf	0.0245981	0.646689	Up	3.61238e-06	0.455931	15:39644851:39669473:1	Rcbtb1
ENSRNOT00000081413	15.0719	30.1437	0	0	#NAME?	0.0395043	0.813217	Down	0.204273	0.00031187	9:4654294:4683160:-1	Sult1c2
ENSRNOT00000081497	34.8427	2.00958	67.6758	33.6766	5.07367	0.0171663	0.533037	Up	0.0149899	0.607156	9:64643281:64843928:1	Spats2l
ENSRNOT00000081553	36.326	0	72.652	Inf	Inf	0.00264602	0.174602	Up	3.44309e-07	0.589316	2:94693600:94730308:-1	Zbtb10
ENSRNOT00000081570	82.8187	149.714	15.9237	0.106361	-3.23296	0.0192284	0.565777	Down	0.869819	0.0913563	14:80982162:81023682:-1	Rgs12
ENSRNOT00000081667	150.854	16.0766	285.632	17.7669	4.15112	0.000720447	0.0759633	Up	0.0230233	0.411412	1:170481468:170565063:1	Dnhd1
ENSRNOT00000081669	28.6317	56.2682	0.995233	0.0176873	-5.82114	0.0173075	0.534733	Down	0.549519	0.0142472	1:164114210:164142206:-1	Dgat2
ENSRNOT00000081767	16.4213	0	32.8427	Inf	Inf	0.0326827	0.750346	Up	9.15893e-17	0.371071	1:178139137:178195948:-1	Btbd10
ENSRNOT00000081912	65.3114	130.623	0	0	#NAME?	0.000110144	0.0217323	Down	1.11766	1.55895e-13	15:45479658:45524582:-1	Gucy1b2
ENSRNOT00000081924	2391.52	413.973	4369.07	10.554	3.39972	0.000171419	0.028467	Up	3.46255	36.1458	20:4877324:4879779:-1	Hspa1b
ENSRNOT00000082005	586.071	1020.87	151.275	0.148183	-2.75455	0.00302321	0.18886	Down	6.69053	0.980557	9:119542328:119588715:1	Lpin2
ENSRNOT00000082082	66.8185	133.637	0	0	#NAME?	9.48658e-05	0.0192907	Down	1.38012	0.00373258	10:3179352:3213237:1	Rrn3
ENSRNOT00000082091	544.133	991.728	96.5376	0.0973428	-3.36078	0.00046884	0.054678	Down	20.3658	1.95218	16:60418423:60426561:-1	Ppp1r3b
ENSRNOT00000082097	50.2593	0	100.519	Inf	Inf	0.000543515	0.0608492	Up	5.66148e-05	1.81032	8:111839091:111850075:-1	Cdv3
ENSRNOT00000082114	23.8856	0	47.7712	Inf	Inf	0.0117948	0.435273	Up	3.97096e-08	0.688434	20:32239748:32258286:-1	Ddx50
ENSRNOT00000082125	852.351	1346.42	358.284	0.266101	-1.90995	0.0294431	0.706067	Down	15.4116	4.04776	1:80639785:80666566:-1	Pvrl2
ENSRNOT00000082146	12709.2	3161.07	22257.4	7.04109	2.8158	0.00240721	0.165417	Up	18.8756	131.386	9:46962288:47036670:1	Il1r1
ENSRNOT00000082408	102.566	12.0575	193.075	16.0129	4.00116	0.00308204	0.190742	Up	0.145814	2.22155	9:46997798:47035275:1	Il1r1
ENSRNOT00000082469	90.369	167.8	12.938	0.0771039	-3.69705	0.00735336	0.33004	Down	1.85597	0.142127	13:90533365:90591796:1	Dcaf8
ENSRNOT00000082532	21.4023	1.00479	41.7998	41.6005	5.37853	0.0400233	0.816361	Up	0.00925484	0.717234	2:264270096:264293010:-1	Cth
ENSRNOT00000082551	192.221	343.638	40.8045	0.118743	-3.07409	0.00505678	0.266592	Down	2.38017	0.280171	10:109893700:109904072:1	Lrrc45
ENSRNOT00000082561	98.6571	27.1293	170.185	6.27309	2.64918	0.0371994	0.793535	Up	0.244055	1.52469	3:22829817:22888598:1	Nek6
ENSRNOT00000082570	150.294	3.01437	297.575	98.7187	6.62525	5.4969e-06	0.00202856	Up	0.0434474	3.84065	6:43743702:43794342:1	Grhl1
ENSRNOT00000082582	17.4166	0	34.8331	Inf	Inf	0.0282961	0.691023	Up	0	0.451557	1:107344904:107363607:1	Gas2
ENSRNOT00000082599	177.452	63.3018	291.603	4.60656	2.20369	0.0400156	0.816361	Up	0.218184	0.992575	14:48768537:48922983:1	Arap2
ENSRNOT00000082607	378.103	609.908	146.299	0.239871	-2.05967	0.0291045	0.705589	Down	3.60072	0.856971	8:118206698:118325537:1	Smarcc1
ENSRNOT00000082623	26.8713	0	53.7426	Inf	Inf	0.00814279	0.355854	Up	0.00174373	0.400422	6:26686205:26696957:1	Slc5a6
ENSRNOT00000082624	921.394	1529.29	313.498	0.204996	-2.28633	0.00980208	0.386804	Down	2.02656	0.411019	3:55665145:55822551:-1	Lrp2
ENSRNOT00000082631	43.2926	0	86.5853	Inf	Inf	0.00118264	0.105213	Up	9.57649e-14	1.14202	2:209358760:209448117:1	Lrif1
ENSRNOT00000082825	15.4261	0	30.8522	Inf	Inf	0.0378676	0.796703	Up	2.31957e-07	0.236048	10:64222285:64341066:-1	Vps53
ENSRNOT00000082893	310.897	499.381	122.414	0.245131	-2.02838	0.0359341	0.782618	Down	5.41915	1.31004	14:86687782:86706626:-1	H2afv
ENSRNOT00000082927	79.1831	13.0623	145.304	11.1239	3.4756	0.0144117	0.489028	Up	0.0711489	0.759312	1:191616541:191676915:-1	Usp31
ENSRNOT00000082931	44.2879	0	88.5757	Inf	Inf	0.00105642	0.0978475	Up	1.44894e-12	1.11304	1:43792199:43831932:-1	Cnksr3
ENSRNOT00000082999	47.2736	0	94.5471	Inf	Inf	0.000755664	0.0784316	Up	0.000173407	1.88946	20:3372413:3374344:-1	Ppp1r18
ENSRNOT00000083028	37.3212	0	74.6425	Inf	Inf	0.00235487	0.16238	Up	0	1.03754	5:149056078:149068932:1	Laptm5
ENSRNOT00000083067	150.532	262.25	38.8141	0.148004	-2.75629	0.0156077	0.510178	Down	2.22188	0.322805	11:38035450:38059312:1	Mx2
ENSRNOT00000083134	719.541	1148.48	290.608	0.253038	-1.98257	0.02561	0.661084	Down	4.08418	1.02165	3:15038267:15060284:1	Dab2ip
ENSRNOT00000083143	112.876	191.915	33.8379	0.176317	-2.50375	0.0393114	0.813217	Down	2.88032	0.503441	2:27713880:27780119:1	Gcnt4
ENSRNOT00000083144	353.436	131.627	575.245	4.37025	2.12771	0.0257486	0.662089	Up	0.371408	1.60503	6:33062402:33088582:-1	LOC102556253
ENSRNOT00000083159	79.8139	145.695	13.9333	0.0956334	-3.38634	0.0162594	0.520928	Down	2.53947	0.235186	19:26074987:26082719:-1	Rnaseh2a
ENSRNOT00000083194	25.3784	0	50.7569	Inf	Inf	0.0097791	0.386663	Up	1.40648e-10	0.835656	8:22291463:22301325:1	Atg4d
ENSRNOT00000083215	1555.45	2698.87	412.026	0.152666	-2.71154	0.00213275	0.153435	Down	18.9742	2.86345	1:275846819:275882444:-1	Gpam
ENSRNOT00000083286	28.8618	0	57.7235	Inf	Inf	0.00640902	0.30628	Up	2.91317e-05	2.44227	6:99985519:100011226:-1	Max
ENSRNOT00000083287	1024.51	400.911	1648.11	4.1109	2.03945	0.0194864	0.570845	Up	1.52057	6.17983	1:261415191:261438539:1	Zfyve27
ENSRNOT00000083351	218.071	24.115	412.026	17.0859	4.09474	0.000288406	0.0390976	Up	0.145406	2.42218	3:109862117:109872871:1	Thbs1
ENSRNOT00000083361	17.5838	35.1677	0	0	#NAME?	0.0273142	0.674496	Down	0.10713	0.000993521	2:179584308:179704629:-1	Gria2
ENSRNOT00000083410	109.136	33.1581	185.113	5.58275	2.48098	0.0429235	0.837209	Up	0.431766	2.36888	8:82560971:82577019:1	Lysmd2
ENSRNOT00000083476	190.078	311.485	68.6711	0.220464	-2.18139	0.0390234	0.810906	Down	2.42592	0.532352	3:152571121:152615920:1	Epb41l1
ENSRNOT00000083504	22.1054	44.2108	0	0	#NAME?	0.0146733	0.493103	Down	0.352812	0.00211997	2:149213135:149315205:1	Med12l
ENSRNOT00000083637	30.1437	60.2874	0	0	#NAME?	0.0054188	0.275474	Down	0.989902	7.22844e-05	3:132889661:133122691:-1	Tasp1
ENSRNOT00000083702	1478.54	234.116	2722.96	11.6308	3.53988	0.000113141	0.0218897	Up	0.801015	9.22336	1:40879747:40906581:1	Akap12
ENSRNOT00000083713	59.7324	108.517	10.9476	0.100883	-3.30924	0.0323218	0.746361	Down	0.675382	0.0657529	2:68821004:68895535:1	LOC100910178
ENSRNOT00000083778	48.6941	89.4263	7.96186	0.0890327	-3.48952	0.0377272	0.796703	Down	0.984384	0.0819377	8:40001030:40008809:1	Esam
ENSRNOT00000083899	199.164	338.614	59.714	0.176348	-2.5035	0.0182768	0.551014	Down	1.47915	0.256168	7:2645196:2667628:1	Timeless
ENSRNOT00000083996	15.0719	30.1437	0	0	#NAME?	0.0395043	0.813217	Down	0.839564	1.52476e-05	17:42258168:42276797:-1	LOC100911664
ENSRNOT00000084076	61.7325	110.527	12.938	0.117058	-3.09471	0.0405042	0.817785	Down	0.520355	0.0596169	10:70136855:70156772:1	Lig3
ENSRNOT00000084088	638.833	1023.88	253.784	0.247865	-2.01237	0.0247876	0.6474	Down	4.61952	1.1319	X:157072736:157095274:-1	Abcd1
ENSRNOT00000084155	650.389	105.503	1195.27	11.3293	3.50199	0.000239594	0.0352409	Up	0.78328	8.7533	6:41799788:41842817:-1	Lpin1
ENSRNOT00000084170	21.1006	42.2012	0	0	#NAME?	0.0167872	0.527659	Down	1.23517	7.10465e-15	4:117767077:117767772:-1	LOC103690120
ENSRNOT00000084283	399.08	625.984	172.175	0.275047	-1.86225	0.0456335	0.85893	Down	2.31277	0.629209	3:161252723:161264818:1	Snx21
ENSRNOT00000084455	16.579	33.1581	0	0	#NAME?	0.0315832	0.732589	Down	0.514013	8.89059e-09	2:187845024:187863349:-1	Lmna
ENSRNOT00000084528	1675.66	2969.15	382.169	0.128713	-2.95777	0.000897701	0.0881251	Down	48.0877	6.11189	6:1570683:1583417:-1	Prkd3
ENSRNOT00000084533	34.8427	2.00958	67.6758	33.6766	5.07367	0.0171663	0.533037	Up	0.0191575	0.534197	6:50928397:50941248:-1	Dus4l
ENSRNOT00000084543	860.069	1399.67	320.465	0.228957	-2.12685	0.0160418	0.517282	Down	14.0296	3.17675	4:78746547:78879294:-1	Igf2bp3
ENSRNOT00000084563	77.1879	12.0575	142.318	11.8033	3.56112	0.0133561	0.46777	Up	0.0353746	0.400103	5:79789671:79874671:-1	Tnc
ENSRNOT00000084640	29.3594	0	58.7187	Inf	Inf	0.00603997	0.295736	Up	8.38401e-05	0.484202	5:117586103:117594335:1	Usp1
ENSRNOT00000084700	905.085	401.916	1408.25	3.50385	1.80894	0.0379325	0.796703	Up	2.86626	9.93539	4:176606649:176619710:1	Golt1b
ENSRNOT00000084730	2659.94	141.675	5178.2	36.5497	5.19179	1.38172e-07	8.88225e-05	Up	0.851277	30.8524	12:23789675:23817865:1	Ywhag
ENSRNOT00000084736	32.3594	3.01437	61.7044	20.4701	4.35545	0.0349569	0.774418	Up	0.0265293	0.596491	4:45000973:45247788:1	ST7
ENSRNOT00000084768	92.6283	15.0719	170.185	11.2916	3.49717	0.00977874	0.386663	Up	0.0758686	0.863591	11:71348717:71368456:-1	Tnk2
ENSRNOT00000084866	189.333	50.2395	328.427	6.53722	2.70868	0.0122531	0.443207	Up	0.213062	1.38433	3:155297619:155356462:1	Dhx35
ENSRNOT00000084867	195380	50366.1	340395	6.7584	2.75668	0.0229208	0.626561	Up	628.957	4201.81	11:81421676:81444621:-1	Kng1l1
ENSRNOT00000085045	87.3164	153.733	20.8999	0.135949	-2.87886	0.030877	0.726465	Down	1.1131	0.149259	12:52475863:52507126:-1	Ankle2
ENSRNOT00000085118	3149.35	4903.38	1395.32	0.284562	-1.81318	0.0331094	0.756657	Down	52.0297	14.6372	X:111884295:111887906:-1	Tsc22d3
ENSRNOT00000085267	90.4311	180.862	0	0	#NAME?	1.09361e-05	0.00341283	Down	0.992283	1.91929e-05	9:50581247:50743999:1	Tpp2
ENSRNOT00000085318	47.7275	95.4551	0	0	#NAME?	0.000704242	0.0750488	Down	0.357106	0.000123424	18:70548607:70727092:1	Myo5b
ENSRNOT00000085527	34.8331	0	69.6663	Inf	Inf	0.00315431	0.19223	Up	7.5772e-07	0.66444	5:136683592:136702750:1	Slc6a9
ENSRNOT00000085534	15.4261	0	30.8522	Inf	Inf	0.0378676	0.796703	Up	1.71758e-05	0.256158	14:79205466:79436522:1	Tbc1d14
ENSRNOT00000085599	13.5647	27.1293	0	0	#NAME?	0.0495447	0.890434	Down	0.145791	0.000464399	2:57860883:57935352:-1	Slc1a3
ENSRNOT00000085619	3831.28	5886.06	1776.49	0.301813	-1.72827	0.0423193	0.835329	Down	42.5565	12.6964	9:79490050:79530821:-1	Mreg
ENSRNOT00000085714	234.284	398.902	69.6663	0.174645	-2.5175	0.0145251	0.490603	Down	2.97637	0.51247	18:35683185:35817127:-1	Mcc
ENSRNOT00000085836	77.3688	154.738	0	0	#NAME?	3.47186e-05	0.00854162	Down	2.4698	1.73559e-07	7:59532641:59547174:-1	Cnot2
ENSRNOT00000085897	10115.7	16154	4077.47	0.252412	-1.98615	0.0254844	0.659239	Down	165.364	41.26	15:28305821:28313841:-1	Ndrg2
ENSRNOT00000085938	48.7275	96.4598	0.995233	0.0103176	-6.59875	0.00203356	0.148988	Down	0.792823	0.00796711	3:153843206:153893847:-1	LOC100911769
ENSRNOT00000085967	79.7948	141.675	17.9142	0.126445	-2.98341	0.0305347	0.721822	Down	0.908913	0.111917	13:48068158:48284408:-1	Srgap2
ENSRNOT00000086193	2947.8	1343.4	4552.19	3.38855	1.76067	0.0381121	0.796955	Up	19.102	63.9667	10:37049677:37055282:-1	LOC103689931
ENSRNOT00000086279	2125.5	665.171	3585.82	5.39083	2.43051	0.00515721	0.269599	Up	6.74063	35.9054	2:208420309:208587260:1	Wdr77
ENSRNOT00000086306	3028.27	5498.21	558.326	0.101547	-3.29978	0.000250933	0.0362362	Down	50.2512	5.04668	13:98451942:98480419:-1	Adck3
ENSRNOT00000086329	785.676	1242.93	328.427	0.264237	-1.9201	0.0293918	0.705687	Down	5.18364	1.35584	3:60051535:60105212:-1	Gpr155
ENSRNOT00000086331	683.833	1069.1	298.57	0.279273	-1.84025	0.0380298	0.796955	Down	6.14205	1.69833	1:64506735:64534912:1	Nlrp12
ENSRNOT00000086343	1036.94	1864.89	208.999	0.11207	-3.15752	0.000541055	0.0608492	Down	15.1245	1.67876	14:86148928:86164341:-1	Gck
ENSRNOT00000086350	70.6759	3.01437	138.337	45.8926	5.52019	0.00114205	0.103921	Up	0.0213247	0.897957	13:35436532:35442222:-1	Inhbb
ENSRNOT00000086355	39.1868	78.3736	0	0	#NAME?	0.00186175	0.141068	Down	1.35988	1.69023e-13	7:123043584:123055783:1	Tef
ENSRNOT00000086390	221.478	8.03832	434.917	54.1054	5.7577	3.99211e-06	0.00162357	Up	0.0414751	2.33979	4:163239849:163261958:-1	Olr1
ENSRNOT00000086423	13.9333	0	27.8665	Inf	Inf	0.0473566	0.873896	Up	0.00138681	1.61744	6:139012967:139102378:-1	AABR07065656.5
ENSRNOT00000086538	21.1006	42.2012	0	0	#NAME?	0.0167872	0.527659	Down	2.27468	5.80045e-25	17:44519860:44520240:-1	Hist1h2bh
ENSRNOT00000086554	35.67	71.3401	0	0	#NAME?	0.00281042	0.182076	Down	0.622466	3.38233e-10	7:144939623:144960527:-1	Zfp385a
ENSRNOT00000086557	25.8761	0	51.7521	Inf	Inf	0.00919616	0.375477	Up	1.06892e-06	3.62394	3:19366370:19366657:1	AABR07051689.1
ENSRNOT00000086678	2200.77	3831.26	570.268	0.148846	-2.74811	0.00178669	0.136943	Down	76.9878	11.3165	9:98550022:98551438:-1	Hes6
ENSRNOT00000086924	377.711	632.013	123.409	0.195263	-2.35651	0.0135649	0.471042	Down	6.99029	1.34889	10:103396155:103414098:1	Gprc5c
ENSRNOT00000086939	56.7706	113.541	0	0	#NAME?	0.000264295	0.0376205	Down	2.70775	8.98987e-12	7:2781286:2786949:-1	Coq10a
ENSRNOT00000086991	344.924	120.575	569.273	4.72133	2.23919	0.0198155	0.576471	Up	0.547967	2.56127	1:255186728:255254307:1	Hectd2
ENSRNOT00000086997	16.579	33.1581	0	0	#NAME?	0.0315832	0.732589	Down	0.772494	9.6828e-07	6:136245027:136249594:1	LOC103692719
ENSRNOT00000087033	545.114	151.723	938.505	6.18563	2.62892	0.00468731	0.251099	Up	1.76203	10.7771	X:15098947:15102332:1	Rbm3
ENSRNOT00000087076	91.6857	26.1245	157.247	6.01912	2.58955	0.0457428	0.859964	Up	0.134124	0.801318	10:88914276:88967732:1	Atp6v0a1
ENSRNOT00000087112	918.905	168.805	1669.01	9.8872	3.30556	0.000348552	0.0442417	Up	1.87909	18.3773	9:46997798:47035275:1	Il1r1
ENSRNOT00000087157	57.2444	108.517	5.9714	0.0550271	-4.18371	0.0115655	0.429995	Down	0.812746	0.042826	1:85112247:85120679:1	Dyrk1b
ENSRNOT00000087188	109.929	199.953	19.9047	0.0995466	-3.32848	0.00900296	0.374938	Down	0.678498	0.0655197	18:56825396:56870801:-1	Arhgef37
ENSRNOT00000087229	36.6701	72.3449	0.995233	0.0137568	-6.18371	0.00723081	0.326951	Down	1.02817	0.0169915	12:18678594:18709188:1	Cyp3a62
ENSRNOT00000087230	31.1485	62.297	0	0	#NAME?	0.00480834	0.256205	Down	0.58092	1.67245e-22	20:47596575:47686862:1	Scml4
ENSRNOT00000087287	1052.86	188.901	1916.82	10.1472	3.34302	0.000278686	0.0388375	Up	2.58926	25.9534	2:235311727:235327952:1	Pla2g12a
ENSRNOT00000087386	6268.33	2794.32	9742.33	3.48648	1.80177	0.0372892	0.79391	Up	9.07418	31.2711	1:239398043:239474255:1	Tmem2
ENSRNOT00000087408	353.821	631.008	76.6329	0.121445	-3.04162	0.00214945	0.15408	Down	3.04347	0.363301	18:32273770:32359824:1	Fgf1
ENSRNOT00000087588	2329.24	710.387	3948.09	5.55766	2.47448	0.00445217	0.241752	Up	5.32011	29.2438	1:250691370:250727218:-1	Sgms1
ENSRNOT00000087619	140.328	0	280.656	Inf	Inf	2.86732e-07	0.000168059	Up	1.00581e-05	1.30825	4:29535852:29564768:1	NEWGENE_621351
ENSRNOT00000087656	268.234	108.517	427.95	3.94361	1.97952	0.0448333	0.850085	Up	0.591261	2.29751	12:25264400:25371001:1	Gtf2ird1
ENSRNOT00000087665	127.887	0	255.775	Inf	Inf	6.51132e-07	0.000316482	Up	1.63003e-05	5.95618	11:17077179:17119582:-1	RGD1563888
ENSRNOT00000087678	31.1437	61.2922	0.995233	0.0162375	-5.94453	0.0131684	0.465285	Down	0.388966	0.00814859	15:45487573:45545875:-1	Gucy1b2
ENSRNOT00000087714	76.79	137.656	15.9237	0.115677	-3.11182	0.0268512	0.669376	Down	1.57607	0.178415	2:216481459:216509675:-1	Rnpc3
ENSRNOT00000087750	128.451	223.063	33.8379	0.151696	-2.72074	0.0216147	0.606674	Down	6.71845	0.995575	4:117757455:117758135:-1	LOC102549803
ENSRNOT00000087883	40.694	81.388	0	0	#NAME?	0.00156353	0.126323	Down	0.381517	1.60804e-10	4:155654911:155679753:1	Foxj2
ENSRNOT00000087919	250.135	488.328	11.9428	0.0244565	-5.35364	6.50657e-06	0.00227479	Down	6.38772	0.160245	X:54233646:54303729:-1	Gk
ENSRNOT00000087922	20.4023	0	40.8045	Inf	Inf	0.0186892	0.557487	Up	0	0.624102	8:49077053:49097591:1	Ift46
ENSRNOT00000087937	1002.25	1684.03	320.465	0.190297	-2.39368	0.00685299	0.317815	Down	13.8817	2.60841	10:29392762:29450644:-1	Adra1b
ENSRNOT00000087945	56.2307	0	112.461	Inf	Inf	0.000286058	0.0390449	Up	1.60235e-09	0.839448	X:22342308:22348233:1	Kdm5c
ENSRNOT00000087958	33.3403	0	66.6806	Inf	Inf	0.00376387	0.216726	Up	0.000724974	1.11092	15:27850151:27852082:1	Apex1
ENSRNOT00000087964	18.9094	0	37.8188	Inf	Inf	0.0229521	0.626561	Up	8.67795e-09	0.783419	13:96122120:96153823:1	Desi2
ENSRNOT00000087971	527.104	236.126	818.081	3.4646	1.79269	0.0473609	0.873896	Up	3.94339	13.5106	9:15637268:15646846:-1	Mrps10
ENSRNOT00000088048	65.7093	5.02395	126.395	25.1584	4.65297	0.00433612	0.237391	Up	0.0289878	0.737624	19:10423501:10450186:-1	Adgrg1
ENSRNOT00000088114	166.58	288.375	44.7855	0.155303	-2.68684	0.0154974	0.509624	Down	1.91427	0.293541	X:70596901:70646921:1	Dlg3
ENSRNOT00000088211	298.92	596.845	0.995233	0.00166749	-9.22811	1.4742e-09	2.09841e-06	Down	9.73323	0.016324	5:64713443:64718131:-1	Acnat1
ENSRNOT00000088212	199.357	65.3114	333.403	5.10482	2.35186	0.0256734	0.661735	Up	3.06876	15.452	11:89569489:89588385:1	Ube2v2
ENSRNOT00000088273	69382.8	20640.4	118125	5.72301	2.51677	0.016928	0.528747	Up	144.752	818.859	4:140886545:140915779:1	Edem1
ENSRNOT00000088288	1916.16	3000.3	832.015	0.27731	-1.85043	0.0299051	0.715424	Down	7.54157	2.06786	1:219964429:220005068:1	Sptbn2
ENSRNOT00000088297	156.68	299.427	13.9333	0.046533	-4.4256	0.000343438	0.043872	Down	2.1901	0.102208	19:44137444:44158624:-1	Tmem231
ENSRNOT00000088313	109.026	10.0479	208.004	20.7012	4.37164	0.00129471	0.111152	Up	0.033708	0.688524	2:18492018:18531210:-1	Vcan
ENSRNOT00000088493	23.8856	0	47.7712	Inf	Inf	0.0117948	0.435273	Up	3.41347e-07	0.369544	5:150084611:150167077:-1	Epb4.1
ENSRNOT00000088557	175.838	351.677	0	0	#NAME?	3.54557e-08	3.21164e-05	Down	7.98619	0.00235427	4:117789006:117790350:-1	Nat8b
ENSRNOT00000088705	1489.14	685.267	2293.02	3.34617	1.74251	0.0411572	0.821824	Up	6.01576	19.9102	8:117486158:117546370:1	Prkar2a
ENSRNOT00000088737	7192.72	1187.66	13197.8	11.1124	3.4741	0.000183715	0.0294135	Up	64.4252	707.557	10:71047310:71053191:1	Wfdc21
ENSRNOT00000088880	22.1006	43.206	0.995233	0.0230346	-5.44005	0.0363279	0.784335	Down	0.605602	0.0137977	11:61609370:61659355:1	Gramd1c
ENSRNOT00000089005	13.5647	27.1293	0	0	#NAME?	0.0495447	0.890434	Down	0.187722	4.12938e-05	20:13965121:13972464:1	Susd2
ENSRNOT00000089055	231.27	392.873	69.6663	0.177325	-2.49553	0.0155447	0.509674	Down	19.6584	3.46513	17:43776050:43776460:-1	LOC684841
ENSRNOT00000089056	134.854	0	269.708	Inf	Inf	4.0846e-07	0.000208713	Up	2.05424e-05	8.47179	16:19389652:19399851:-1	Tpm4
ENSRNOT00000089065	141.972	241.15	42.795	0.177462	-2.49441	0.0290696	0.705589	Down	1.39226	0.241398	3:64269817:64364101:-1	Zfp385b
ENSRNOT00000089086	40.8045	0	81.6091	Inf	Inf	0.00157206	0.126323	Up	2.14368e-11	1.37423	4:23115749:23122725:-1	Steap4
ENSRNOT00000089146	33.3403	0	66.6806	Inf	Inf	0.00376387	0.216726	Up	0.00238378	0.877551	10:84629744:84639111:-1	Snx11
ENSRNOT00000089160	141.983	34.1629	249.803	7.31213	2.87029	0.0135677	0.471042	Up	0.273081	1.98453	4:183401318:183417667:-1	Fam60a
ENSRNOT00000089177	33.8379	0	67.6758	Inf	Inf	0.00354824	0.208582	Up	1.21666e-05	0.519023	4:133037014:133131953:-1	Shq1
ENSRNOT00000089179	77.2261	20.0958	134.356	6.6858	2.7411	0.0466154	0.865752	Up	0.25664	1.70976	5:165922915:165935820:1	Dffa
ENSRNOT00000089232	8926.98	15222.6	2631.4	0.172861	-2.53231	0.00496234	0.262306	Down	158.268	27.0449	5:64669999:64674250:-1	Acnat2
ENSRNOT00000089314	45.206	88.4215	1.99047	0.0225111	-5.47322	0.0060312	0.295736	Down	0.903723	0.0237889	5:167141875:167174310:1	Slc2a5
ENSRNOT00000089371	3959.46	6680.85	1238.07	0.185316	-2.43194	0.00531984	0.274275	Down	129.792	23.769	1:76558717:76614326:-1	Sult2a2
ENSRNOT00000089407	294.211	25.1198	563.302	22.4247	4.48701	4.29955e-05	0.010449	Up	0.42747	9.43709	7:121297414:121302025:-1	Rpl3
ENSRNOT00000089417	232.351	410.959	53.7426	0.130774	-2.93486	0.00522765	0.271515	Down	2.29551	0.296704	20:3556975:3575780:1	Ddr1
ENSRNOT00000089470	370.227	0	740.453	Inf	Inf	3.37865e-11	9.61853e-08	Up	0.000184012	5.25976	9:93086012:93152691:1	Psmd1
ENSRNOT00000089501	6188.57	9566.61	2810.54	0.293786	-1.76716	0.0407818	0.817785	Down	77.5113	22.5122	16:48938935:49003246:-1	Acsl1
ENSRNOT00000089550	667.704	293.399	1042.01	3.55151	1.82843	0.0395427	0.813217	Up	2.31628	8.13173	20:3377228:3386048:-1	Dhx16
ENSRNOT00000089551	68.2499	16.0766	120.423	7.49057	2.90508	0.0445745	0.849217	Up	0.144821	1.06711	2:78245459:78271382:1	Fam134b
ENSRNOT00000089631	650.79	1026.9	274.684	0.26749	-1.90244	0.0329372	0.753584	Down	11.0916	2.93403	15:28028521:28035389:1	LOC103693457
ENSRNOT00000089673	338.417	8.03832	668.796	83.201	6.37853	1.23766e-07	8.50488e-05	Up	0.082253	6.66068	9:42871950:42884204:1	Arid5a
ENSRNOT00000089719	236.169	376.796	95.5423	0.253565	-1.97957	0.0494238	0.890434	Down	1.33229	0.335559	3:152552822:152619722:1	Epb41l1
ENSRNOT00000089736	151.723	303.447	0	0	#NAME?	1.36764e-07	8.88225e-05	Down	6.53656	7.98282e-05	17:27496472:27523912:1	Ssr1
ENSRNOT00000089800	196.738	351.677	41.7998	0.118859	-3.07268	0.00487158	0.258194	Down	2.44793	0.290827	14:8383214:8432195:-1	Arhgap24
ENSRNOT00000089804	27.3785	2.00958	52.7473	26.2479	4.71413	0.0365068	0.784906	Up	0.00714182	0.178358	12:8085525:8108532:1	Slc7a1
ENSRNOT00000089805	90.5662	0	181.132	Inf	Inf	1.11318e-05	0.00341283	Up	5.55469e-07	3.52264	2:78247448:78255514:1	Fam134b
ENSRNOT00000089809	94.3212	161.771	26.8713	0.166107	-2.58982	0.0438395	0.843275	Down	1.59501	0.264187	X:75150608:75224268:-1	Abcb7
ENSRNOT00000089893	484.596	924.407	44.7855	0.0484478	-4.36743	1.93423e-05	0.00538743	Down	4.2853	0.2053	3:159902441:159965003:1	Hnf4a
ENSRNOT00000089935	113.457	0	226.913	Inf	Inf	1.81647e-06	0.000822694	Up	8.29922e-07	4.12428	3:150803390:150855228:-1	Pigu
ENSRNOT00000089950	122.093	37.1772	207.008	5.56815	2.4772	0.0370231	0.791343	Up	0.80538	4.48321	1:64024240:64030175:-1	Tsen34
ENSRNOT00000090031	101.345	173.829	28.8618	0.166036	-2.59044	0.0394436	0.813217	Down	2.27273	0.37625	11:81621325:81639876:-1	Hrg
ENSRNOT00000090114	267.703	101.484	433.922	4.27577	2.09618	0.0344321	0.770971	Up	0.470156	1.99762	8:58120259:58156580:1	Npat
ENSRNOT00000090208	32.3451	0	64.6901	Inf	Inf	0.00423644	0.233861	Up	2.62985e-09	0.588144	7:122940826:122963299:-1	Rangap1
ENSRNOT00000090228	317.093	546.606	87.5805	0.160226	-2.64182	0.007489	0.333872	Down	5.75142	0.910716	15:34548295:34550860:-1	Cbln3
ENSRNOT00000090258	21.603	43.206	0	0	#NAME?	0.01569	0.510898	Down	0.333694	0.00150054	8:79323485:79406219:1	Nedd4
ENSRNOT00000090259	326.043	126.604	525.483	4.15062	2.05333	0.0327374	0.750737	Up	1.46508	6.0104	scaffold:Rnor_6.0:KL568414.1:83509:113951:1	LOC103694865
ENSRNOT00000090262	1257.48	1988.48	526.478	0.264764	-1.91722	0.0262059	0.669336	Down	14.2813	3.74113	10:62140423:62191512:-1	Rpa1
ENSRNOT00000090312	466.983	150.719	783.248	5.19676	2.37761	0.0108724	0.415465	Up	1.79614	9.19975	19:24849356:24854953:1	Ddx39a
ENSRNOT00000090387	32.1533	64.3066	0	0	#NAME?	0.00426614	0.23485	Down	0.500874	1.23787e-10	17:53965562:53969159:1	Ggps1
ENSRNOT00000090453	93.6618	23.1102	164.213	7.10568	2.82897	0.0298497	0.714957	Up	0.0986646	0.704026	17:72240852:72393448:1	Taf3
ENSRNOT00000090457	344.141	688.281	0	0	#NAME?	6.39387e-11	1.32816e-07	Down	9.30722	6.45872e-05	17:34939517:34945317:-1	LOC103689964
ENSRNOT00000090579	261.215	97.4646	424.964	4.36019	2.12439	0.0329321	0.753584	Up	0.795095	3.43635	5:25577593:25584278:-1	Pdp1
ENSRNOT00000090581	16.0766	32.1533	0	0	#NAME?	0.0340082	0.766456	Down	2.29501	2.12684e-46	3:19441604:19441888:1
ENSRNOT00000090629	1913.76	2913.89	913.624	0.313541	-1.67327	0.0483672	0.883465	Down	17.0178	5.27327	1:82327955:82344345:-1	Ceacam1
ENSRNOT00000090668	118.069	28.1341	208.004	7.39329	2.88622	0.0181275	0.548171	Up	0.457552	3.29809	13:85376772:85443727:-1	Uck2
ENSRNOT00000090780	49.264	0	98.528	Inf	Inf	0.000606242	0.0660056	Up	3.80686e-07	0.71665	8:48472824:48481001:1	Mcam
ENSRNOT00000090799	1348.11	536.558	2159.66	4.02502	2.009	0.0199325	0.578411	Up	0.875915	3.48466	5:47894663:48008969:1	Mdn1
ENSRNOT00000090838	28.6222	54.2587	2.9857	0.0550271	-4.18371	0.0491347	0.890434	Down	0.534998	0.0249477	1:101213788:101230477:1	Tead2
ENSRNOT00000090849	42.1677	77.3688	6.96663	0.0900444	-3.47322	0.0493118	0.890434	Down	2.496	0.208383	7:18559736:18577368:-1	2019-03-02
ENSRNOT00000090881	33.6509	65.3114	1.99047	0.0304766	-5.03616	0.0190467	0.563151	Down	0.191546	0.00662643	9:89050381:89193821:-1	Sphkap
ENSRNOT00000090923	198.767	359.715	37.8188	0.105136	-3.24968	0.00310015	0.191268	Down	4.63175	0.482489	18:24717336:24745747:1	Lims2
ENSRNOT00000090984	33.6414	63.3018	3.98093	0.0628881	-3.99107	0.0440265	0.844428	Down	4.23253	0.271887	7:123095810:123101851:-1	Phf5a
ENSRNOT00000091004	385.231	120.575	649.887	5.38991	2.43026	0.0109555	0.417439	Up	1.70011	9.08173	4:13405136:13485883:1	Gnai1
ENSRNOT00000091015	32.3451	0	64.6901	Inf	Inf	0.00423644	0.233861	Up	4.27036e-10	0.288884	13:53148066:53224768:-1	Camsap2
ENSRNOT00000091095	1141.32	268.279	2014.35	7.50842	2.90851	0.00121693	0.106364	Up	2.33415	17.3238	4:44321883:44360405:1	Tes
ENSRNOT00000091116	43.7902	0	87.5805	Inf	Inf	0.00111767	0.10217	Up	0.000428374	0.522343	1:259641676:259674425:-1	Aldh18a1
ENSRNOT00000091249	609.377	271.293	947.462	3.49239	1.80421	0.0434719	0.841893	Up	2.14742	7.42068	4:14039977:14241269:1	Cd36
ENSRNOT00000091270	55.2635	110.527	0	0	#NAME?	0.000310036	0.0406474	Down	0.385557	1.58341e-08	7:121930615:122140091:1	Tnrc6b
ENSRNOT00000091273	56.7133	101.484	11.9428	0.117682	-3.08704	0.0471334	0.873743	Down	1.09844	0.131664	3:153402548:153441611:1	Rpn2
ENSRNOT00000091377	21.1006	42.2012	0	0	#NAME?	0.0167872	0.527659	Down	0.436442	8.25814e-05	1:254531659:254574124:1	AC080157.1
ENSRNOT00000091424	724.853	1114.31	335.393	0.300987	-1.73223	0.0491835	0.890434	Down	11.9623	3.56129	18:3995921:4079942:1	Ttc39c
ENSRNOT00000091444	522.027	947.517	96.5376	0.101885	-3.29499	0.000609445	0.0660056	Down	12.4557	1.25026	2:200793571:200808501:1	Hao2
ENSRNOT00000091470	550.712	177.848	923.576	5.19307	2.37659	0.00974249	0.386663	Up	1.65856	8.49516	1:154377465:154457290:1	Picalm
ENSRNOT00000091597	276.609	509.429	43.7902	0.0859595	-3.5402	0.000762278	0.0787082	Down	8.38047	0.707684	1:101687896:101692845:1	Dbp
ENSRNOT00000091675	106.552	13.0623	200.042	15.3145	3.93682	0.00311296	0.191466	Up	0.110006	1.64497	11:87678295:87718826:1	Klhl22
ENSRNOT00000091680	22.1006	43.206	0.995233	0.0230346	-5.44005	0.0363279	0.784335	Down	0.646756	0.0170409	1:219440192:219443564:1	Ppp1ca
ENSRNOT00000091702	1755	2699.87	810.12	0.300059	-1.73668	0.0411023	0.821551	Down	12.7445	3.77861	7:141428063:141528397:-1	Lima1
ENSRNOT00000091704	43.2926	0	86.5853	Inf	Inf	0.00118264	0.105213	Up	0	1.34509	8:5686298:5698579:1	Mmp3
ENSRNOT00000091722	129.049	244.164	13.9333	0.0570652	-4.13125	0.00120625	0.106363	Down	0.94402	0.0541866	8:79489790:79593806:1	Prtg
ENSRNOT00000091731	1063.31	293.399	1833.22	6.24822	2.64344	0.00303443	0.188969	Up	7.31853	45.1603	20:6351458:6357756:1	Cdkn1a
ENSRNOT00000091732	53.288	9.04311	97.5328	10.7853	3.431	0.0343356	0.769674	Up	0.0619654	0.663743	8:55312763:55402711:-1	Sik2
ENSRNOT00000091756	73.1926	9.04311	137.342	15.1875	3.92481	0.0087626	0.368399	Up	0.122886	1.9536	11:60054408:60066739:1	Abhd10
ENSRNOT00000091821	15.9237	0	31.8474	Inf	Inf	0.035169	0.774418	Up	0.00636156	0.461501	13:91146997:91160089:-1	Fcgr2a
ENSRNOT00000091822	378.754	642.061	115.447	0.179807	-2.47548	0.00983055	0.387161	Down	5.06496	0.903578	1:166125474:166394059:1	Fchsd2
ENSRNOT00000091834	29.3641	1.00479	57.7235	57.4483	5.84419	0.0162205	0.520519	Up	0.0136141	0.608806	3:161813598:161819029:-1	Elmo2
ENSRNOT00000091935	204.769	52.2491	357.289	6.83818	2.77361	0.00939577	0.37987	Up	0.430524	2.89416	3:122114108:122151182:1	Sirpa
ENSRNOT00000092028	59.7235	2.00958	117.437	58.4388	5.86885	0.00156629	0.126323	Up	0.0290341	1.45247	2:144003454:144007636:-1	Rfxap
ENSRNOT00000092066	396.284	142.68	649.887	4.55485	2.1874	0.0203872	0.586556	Up	2.82628	12.6917	1:157573324:157659508:1	Rab30
ENSRNOT00000092079	888.481	1409.72	367.241	0.260506	-1.94061	0.0267524	0.669376	Down	7.97851	2.05616	15:5306459:5311204:1	Cd99l2
ENSRNOT00000092159	94.8189	161.771	27.8665	0.172259	-2.53735	0.0474158	0.874073	Down	1.1041	0.188868	9:4807717:4834335:1	LOC100910526
ENSRNOT00000092170	1433.25	2431.59	434.917	0.178861	-2.48309	0.00462035	0.24885	Down	18.8874	3.34288	1:275847064:275906686:-1	Gpam
ENSRNOT00000092353	13.5647	27.1293	0	0	#NAME?	0.0495447	0.890434	Down	1.17468	2.61098e-29	16:81690613:81693000:-1	Lamp1
ENSRNOT00000092612	144.484	246.174	42.795	0.173841	-2.52416	0.0267389	0.669376	Down	3.21482	0.552862	2:187774062:187786704:-1	Slc25a44
ENSRNOT00000092644	14.5695	29.1389	0	0	#NAME?	0.0426003	0.835329	Down	0.712207	1.65536e-24	16:81665552:81685174:1	Grtp1

## Sheet: 12h vs 0h
id	baseMean	baseMean_control_0h	baseMean_case_12h	foldChange	log2FoldChange	pval	padj	up_down	expression_0h	expression_12h	chromosome_position	gene_symbol
ENSRNOT00000000018	73.352	8.14068	138.563	17.0211	4.08925	0.0114664	0.417502	Up	0.126448	2.19338	4:25435873:25446461:1	Steap1
ENSRNOT00000000181	397.328	677.712	116.944	0.172556	-2.53486	0.00808434	0.340904	Down	5.43922	0.937966	3:114711562:114728410:-1	Gatm
ENSRNOT00000000256	73.7039	0	147.408	Inf	Inf	0.000133139	0.0217123	Up	0	3.52519	10:69423086:69424979:1	Ccl7
ENSRNOT00000000434	3186.42	4930.2	1442.63	0.292611	-1.77294	0.0447206	0.841783	Down	49.3661	14.4632	20:27103317:27117663:-1	Pbld1
ENSRNOT00000000595	190.452	332.75	48.1532	0.144713	-2.78874	0.0136289	0.459575	Down	2.71532	0.396187	20:7762327:7786019:1	Zfp523
ENSRNOT00000000624	74.2837	148.567	0	0	#NAME?	0.000116291	0.0199086	Down	2.39457	2.07425e-09	20:6211420:6219893:1	Kctd20
ENSRNOT00000000784	1304.63	2155.25	454.016	0.210656	-2.24704	0.00873667	0.357864	Down	8.59983	1.81495	20:20638579:20713128:-1	Rhobtb1
ENSRNOT00000000792	20.6371	0	41.2742	Inf	Inf	0.0301934	0.706511	Up	0	0.261184	20:22454463:22459025:-1	Egr2
ENSRNOT00000000889	105.165	29.51	180.82	6.12743	2.61528	0.0481346	0.865472	Up	0.277802	1.69343	12:48598647:48605704:1	Tmem119
ENSRNOT00000000995	1120.2	1801.13	439.275	0.243889	-2.0357	0.0166872	0.515051	Down	54.2354	13.2348	20:1876173:1878126:-1	Ubd
ENSRNOT00000001036	4162.48	7008.11	1316.84	0.187903	-2.41194	0.00936613	0.366413	Down	84.0627	15.8151	20:3176107:3179818:1	RT1-S3
ENSRNOT00000001234	91.7764	22.3869	161.166	7.19912	2.84782	0.0415901	0.822119	Up	0.069978	0.506034	12:8085525:8108972:1	Slc7a1
ENSRNOT00000001243	646.481	995.198	297.764	0.2992	-1.74082	0.0452273	0.842144	Down	8.37815	2.51259	12:8725517:8741951:1	Slc46a3
ENSRNOT00000001360	6423.39	10287.8	2559	0.248742	-2.00728	0.0382211	0.787841	Down	124.884	31.0981	15:58654913:58658153:1	Tsc22d1
ENSRNOT00000001421	18.1803	0	36.3606	Inf	Inf	0.0400894	0.801061	Up	2.88954e-07	1.35223	12:37680699:37682964:-1	LOC100910427
ENSRNOT00000001581	360.22	146.532	573.908	3.9166	1.9696	0.0388454	0.795656	Up	1.80095	7.07662	12:47667556:47687707:1	Gltp
ENSRNOT00000001699	5228.08	9006.65	1449.51	0.160938	-2.63542	0.00620558	0.29486	Down	97.9597	15.7911	20:12806957:12820466:-1	Ftcd
ENSRNOT00000001874	128.498	244.22	12.7753	0.0523107	-4.25675	0.00171258	0.122844	Down	2.51966	0.134468	12:22122953:22125091:1	Irs3
ENSRNOT00000001875	2790.14	5059.43	520.841	0.102945	-3.28006	0.000393057	0.0439829	Down	78.3854	8.08679	12:41620393:41627741:-1	Sds
ENSRNOT00000001876	44.265	88.5299	0	0	#NAME?	0.00210517	0.143913	Down	1.6488	2.96694e-23	12:41620591:41625403:-1	Sds
ENSRNOT00000001916	2339.2	47.8265	4630.57	96.8202	6.59724	7.97263e-10	8.40484e-07	Up	0.314268	30.7194	12:22641104:22651482:1	Serpine1
ENSRNOT00000001990	1204.02	11.1934	2396.85	214.13	7.74234	7.34752e-12	1.05122e-08	Up	0.150585	33.1991	1:258210344:258252448:1	LOC100361492
ENSRNOT00000002121	421.695	121.093	722.298	5.96484	2.57648	0.00665623	0.310056	Up	1.86368	11.1009	11:16873646:16889201:-1	Btg3
ENSRNOT00000002223	61.5639	123.128	0	0	#NAME?	0.000376598	0.0426173	Down	0.946184	1.89107e-09	11:46208075:46369577:-1	Abi3bp
ENSRNOT00000002259	226.562	375.489	77.6348	0.206756	-2.274	0.0321467	0.726748	Down	5.12643	1.06718	11:35568182:35585390:1	Kcnj15
ENSRNOT00000002366	7911.38	13480	2342.8	0.173799	-2.52451	0.0132381	0.453923	Down	121.006	21.0572	11:72578533:72614176:-1	Bdh1
ENSRNOT00000002410	9864.59	16380.1	3349.11	0.204462	-2.29009	0.0285432	0.690482	Down	107.212	21.9446	11:82945104:82978364:1	Ehhadh
ENSRNOT00000002411	344.904	112.952	576.856	5.10709	2.3525	0.0158141	0.500618	Up	0.541416	2.7776	11:71348727:71387992:-1	Tnk2
ENSRNOT00000002576	1577.64	2717.97	437.31	0.160896	-2.6358	0.00252966	0.163449	Down	25.2847	4.07417	11:87058616:87075785:1	Prodh
ENSRNOT00000002579	2154.29	985.022	3323.55	3.37409	1.7545	0.0406546	0.807849	Up	19.0066	64.2027	11:86890585:86898818:1	Ranbp1
ENSRNOT00000002695	746.306	1229.24	263.369	0.214253	-2.22261	0.0108127	0.403311	Down	9.77584	2.09408	11:38035696:38059577:1	Mx2
ENSRNOT00000002728	2374.38	3937.04	811.726	0.206177	-2.27805	0.00944059	0.368606	Down	49.9792	10.3129	14:22806132:22825444:1	Ugt2b10
ENSRNOT00000002869	94.0414	11.1934	176.889	15.803	3.98212	0.00692451	0.315357	Up	0.127882	1.95695	14:36550340:36554580:-1	Rasl11b
ENSRNOT00000002936	163.375	14.2462	312.505	21.936	4.45523	0.00053014	0.0528994	Up	0.0959776	2.08414	14:10343282:10395047:-1	Gpat3
ENSRNOT00000002984	28.4575	54.9496	1.96544	0.035768	-4.80519	0.047898	0.862645	Down	0.751001	0.0327768	14:45982311:46030937:1	Rell1
ENSRNOT00000003076	642.132	196.394	1087.87	5.53922	2.46968	0.0056788	0.276755	Up	1.335	7.41572	14:11095163:11166428:1	Tmem150c
ENSRNOT00000003173	104.954	189.271	20.6371	0.109035	-3.19714	0.0187922	0.555173	Down	2.34284	0.251817	14:11256268:11274578:1	Hnrnpd
ENSRNOT00000003313	226.353	47.8265	404.88	8.4656	3.08161	0.00509402	0.258312	Up	0.224438	1.90476	13:105039853:105141030:-1	Tgfb2
ENSRNOT00000003320	464.078	99.7233	828.432	8.3073	3.05438	0.0013825	0.106506	Up	0.558339	4.64634	13:68949665:69101588:1	Fam129a
ENSRNOT00000003452	26.042	0	52.0841	Inf	Inf	0.0160629	0.503112	Up	0	0.183585	13:77829382:77896697:-1	Tnn
ENSRNOT00000003472	94.7071	21.3693	168.045	7.86385	2.97524	0.0325562	0.731876	Up	0.0893979	0.699079	14:17969219:18076907:-1	Parm1
ENSRNOT00000003633	2860.39	4427.51	1293.26	0.292096	-1.77549	0.0424399	0.822119	Down	34.0656	9.96436	10:7093405:7200499:-1	Abat
ENSRNOT00000003686	222.475	50.8793	394.07	7.7452	2.9533	0.00714712	0.320261	Up	0.414749	3.24843	14:18231860:18272484:1	Btc
ENSRNOT00000003774	434.512	66.143	802.881	12.1386	3.60153	0.000277542	0.0347227	Up	0.462303	5.59377	13:88054817:88061108:-1	Rgs4
ENSRNOT00000003778	1109.66	239.133	1980.18	8.28067	3.04975	0.000574607	0.0564185	Up	5.2393	43.4627	14:18743685:18745457:-1	Cxcl1
ENSRNOT00000003940	464.025	96.6706	831.38	8.60013	3.10436	0.00118248	0.096674	Up	2.26765	19.587	10:106975178:106976040:-1	Socs3
ENSRNOT00000003966	286.087	64.1079	508.066	7.92517	2.98644	0.0040796	0.225275	Up	0.700871	5.58212	10:48569555:48586365:1	Adora2b
ENSRNOT00000004026	580.287	228.957	931.617	4.06897	2.02466	0.0226398	0.605049	Up	0.741175	3.01332	10:10644572:10690223:1	Ppl
ENSRNOT00000004187	31.447	0	62.894	Inf	Inf	0.00863766	0.354533	Up	0.00137499	1.20188	X:9436707:9467884:1	Cask
ENSRNOT00000004278	38.326	0	76.6521	Inf	Inf	0.00411635	0.225275	Up	1.03443e-05	1.97201	X:72074202:72077590:-1	Rps4x
ENSRNOT00000004305	2467.89	4118.17	817.622	0.19854	-2.3325	0.00816001	0.341332	Down	44.1022	8.76885	X:13114569:13116743:-1	Mid1ip1
ENSRNOT00000004359	154.906	265.59	44.2223	0.166506	-2.58635	0.0284918	0.690248	Down	10.6436	1.77255	10:35737664:35739625:-1	Ltc4s
ENSRNOT00000004391	711.122	294.082	1128.16	3.83621	1.93968	0.0252788	0.643372	Up	1.33461	5.12711	14:20479323:20920286:-1	Slc4a4
ENSRNOT00000004408	2341.74	683.817	3999.67	5.84903	2.5482	0.00402468	0.224553	Up	5.41441	31.7241	13:50913180:50916982:-1	Btg2
ENSRNOT00000004713	112.222	11.1934	213.25	19.0513	4.25182	0.00267448	0.17115	Up	0.0419533	0.767074	13:89622632:89634419:1	Adamts4
ENSRNOT00000004753	9761.26	19326	196.544	0.0101699	-6.61955	1.76502e-07	0.00010398	Down	91.9895	0.937212	10:46570996:46582854:-1	Srebf1
ENSRNOT00000004842	880.43	138.392	1622.47	11.7238	3.55136	0.000100945	0.0178429	Up	2.91881	34.243	10:12995904:12997930:-1	Tnfrsf12a
ENSRNOT00000004931	24.0766	0	48.1532	Inf	Inf	0.0201574	0.573845	Up	0	0.346995	13:80928995:80968971:-1	Mroh9
ENSRNOT00000004992	26.9486	52.9144	0.982719	0.0185718	-5.75074	0.0328687	0.735599	Down	0.0692629	0.00120677	13:106751625:107427329:1	Ush2a
ENSRNOT00000005005	3513.8	6487.11	540.495	0.0833184	-3.58522	0.000181772	0.0267712	Down	63.7569	5.32002	13:93684437:93716227:1	Kmo
ENSRNOT00000005033	631.601	212.675	1050.53	4.93958	2.30439	0.00951875	0.370935	Up	2.666	13.1568	X:43543070:43592200:-1	Acot9
ENSRNOT00000005085	323.823	1.01759	646.629	635.454	9.31164	1.22663e-09	1.22847e-06	Up	0.0156315	6.96446	13:109817895:109849632:-1	Atf3
ENSRNOT00000005251	89.9536	2.03517	177.872	87.3991	6.44955	0.000304374	0.036734	Up	0.0362926	2.64142	13:61066153:61070599:-1	Rgs1
ENSRNOT00000005286	1748.64	796.769	2700.51	3.38933	1.761	0.0380009	0.786075	Up	7.68682	26.0744	7:54213319:54236625:1	Nap1l1
ENSRNOT00000005289	59.9633	1.01759	118.909	116.854	6.86856	0.00150587	0.11158	Up	0.00959498	1.04794	13:44615553:44648620:1	Rab3gap1
ENSRNOT00000005296	27.5161	0	55.0322	Inf	Inf	0.0135592	0.459436	Up	2.4883e-05	0.634097	13:73671412:73704480:-1	Tor1aip1
ENSRNOT00000005331	391.697	33.5803	749.814	22.329	4.48085	2.21431e-05	0.00583588	Up	0.221792	4.9572	X:134856726:134866210:-1	Apln
ENSRNOT00000005459	5516.08	9526.63	1505.53	0.158033	-2.6617	0.00611867	0.291802	Down	99.5691	15.7576	13:102698546:102721218:-1	2019-03-01
ENSRNOT00000005476	193.665	319.522	67.8076	0.212216	-2.2364	0.04205	0.822119	Down	2.09725	0.444197	18:41333551:41389510:-1	Sema6a
ENSRNOT00000005561	2366.22	3948.23	784.21	0.198623	-2.3319	0.00799351	0.340904	Down	31.0956	6.18024	7:94480396:94563001:-1	Enpp2
ENSRNOT00000005583	109.92	192.324	27.5161	0.143072	-2.80519	0.0329999	0.735818	Down	0.29312	0.0415811	10:52351192:52710862:-1	Dnah9
ENSRNOT00000005604	2024.74	3690.78	358.692	0.097186	-3.36311	0.000217262	0.0294038	Down	21.524	2.09401	X:134940615:134969996:1	Xpnpep2
ENSRNOT00000005641	1142.07	1930.36	353.779	0.183271	-2.44795	0.00457866	0.243911	Down	32.0102	5.86688	10:82839153:82852660:-1	Pdk2
ENSRNOT00000005665	1008.64	1541.64	475.636	0.308526	-1.69654	0.0441203	0.836866	Down	5.65817	1.7485	10:98319487:98388637:-1	Abca8a
ENSRNOT00000005722	476.493	795.752	157.235	0.197593	-2.3394	0.0112106	0.412328	Down	10.3565	2.04924	7:94795214:94995809:1	Deptor
ENSRNOT00000005726	228.281	74.2837	382.278	5.14618	2.3635	0.0262798	0.65963	Up	0.835408	4.29255	13:74252405:74276964:-1	Tor3a
ENSRNOT00000005794	58.0024	116.005	0	0	#NAME?	0.000530843	0.0528994	Down	6.19601	2.74872e-07	7:65005791:65008823:1	LOC100911956
ENSRNOT00000005825	3781.28	5866.38	1696.17	0.289135	-1.79019	0.0464354	0.852491	Down	92.0861	26.6536	6:75540174:75551625:-1	Sptssa
ENSRNOT00000005829	3696.72	6208.29	1185.16	0.190899	-2.38911	0.00906123	0.361668	Down	66.3203	12.6785	7:67341080:67345308:-1	Avpr1a
ENSRNOT00000005851	2692.63	4386.81	998.442	0.227601	-2.13542	0.01537	0.497131	Down	17.3416	3.95023	14:91905919:91996774:-1	Ddc
ENSRNOT00000005863	974.021	1643.4	304.643	0.185373	-2.43149	0.00496658	0.255619	Down	10.8217	2.00568	6:41799749:41870046:-1	Lpin1
ENSRNOT00000005894	61.3547	110.917	11.7926	0.10632	-3.23352	0.0485317	0.867841	Down	1.99301	0.219693	14:64686793:64739694:1	Adgra3
ENSRNOT00000005901	2208.6	3638.88	778.313	0.213888	-2.22507	0.0107145	0.402648	Down	42.4449	9.09474	3:170354141:170362513:1	Fam210b
ENSRNOT00000005995	397.178	755.048	39.3087	0.0520612	-4.26365	4.17825e-05	0.00923054	Down	19.841	1.04717	7:28412220:28485710:1	Igf1
ENSRNOT00000006004	7765.97	13482	2049.95	0.152051	-2.71737	0.00794834	0.340904	Down	123.089	18.7374	7:78769807:78847974:-1	Dpys
ENSRNOT00000006087	9038.16	14632.9	3443.45	0.235323	-2.08729	0.0415712	0.822119	Down	71.4248	16.8313	14:99919485:100098796:1	Egfr
ENSRNOT00000006128	1862.84	665.501	3060.19	4.59832	2.20111	0.0108075	0.403311	Up	7.53068	34.6648	6:132771021:132797675:-1	Wars
ENSRNOT00000006143	40.7034	81.4068	0	0	#NAME?	0.0030432	0.185839	Down	0.69233	3.33566e-05	6:115576576:115616766:-1	Sel1l
ENSRNOT00000006144	99.7459	0	199.492	Inf	Inf	1.55427e-05	0.00444743	Up	0	1.27212	6:144069077:144123596:-1	Wdr60
ENSRNOT00000006200	1152.64	482.335	1822.94	3.77941	1.91816	0.0235434	0.619454	Up	2.68003	10.1423	3:142748674:142752325:-1	Thbd
ENSRNOT00000006217	169.926	281.871	57.9804	0.205698	-2.2814	0.045076	0.842144	Down	2.69157	0.551488	10:98706960:98823287:1	Map2k6
ENSRNOT00000006284	260.529	436.544	84.5138	0.193597	-2.36887	0.0217643	0.592308	Down	4.81983	0.932557	6:94824112:94834908:-1	L3hypdh
ENSRNOT00000006345	51.1885	5.08793	97.2892	19.1216	4.25713	0.0227231	0.605924	Up	0.0203975	0.433739	19:37852833:37866355:1	Nrn1l
ENSRNOT00000006389	634.267	999.269	269.265	0.269462	-1.89185	0.0306556	0.711508	Down	4.26583	1.14905	3:128155117:128419545:1	Plcb1
ENSRNOT00000006403	181.803	0	363.606	Inf	Inf	8.81404e-08	5.88484e-05	Up	0	1.65633	6:42180894:42286970:1	Rock2
ENSRNOT00000006408	1983.41	905.651	3061.17	3.38008	1.75706	0.0394931	0.800654	Up	4.76626	16.1356	3:122114754:122152477:1	Sirpa
ENSRNOT00000006720	77.7917	9.15827	146.425	15.9883	3.99894	0.0111241	0.411098	Up	0.140165	2.2292	3:4861753:4866833:-1	Med22
ENSRNOT00000006852	181.674	49.8617	313.487	6.28714	2.6524	0.0197064	0.568216	Up	0.224665	1.42483	14:89194092:89208825:-1	Hus1
ENSRNOT00000006888	531.586	885.299	177.872	0.200917	-2.31532	0.0107364	0.402715	Down	12.3213	2.47906	6:138054662:138508753:-1	Ighm
ENSRNOT00000007002	569.961	142.462	997.459	7.00159	2.80768	0.00222621	0.149634	Up	0.749303	5.23934	14:104581190:104612597:-1	Slc1a4
ENSRNOT00000007174	759.12	1346.27	171.976	0.127743	-2.96869	0.000944449	0.0815402	Down	11.0608	1.41819	6:7935771:7961207:-1	Abcg5
ENSRNOT00000007351	417.549	165.866	669.231	4.03476	2.01248	0.0305777	0.711508	Up	3.95977	16.0117	7:34478331:34485034:-1	Snrpf
ENSRNOT00000007367	3049.16	647.184	5451.14	8.42286	3.07431	0.000877065	0.0769342	Up	11.0801	93.4892	X:15098904:15102340:1	Rbm3
ENSRNOT00000007427	649.729	209.623	1089.84	5.19904	2.37824	0.00744443	0.328441	Up	2.32438	12.0744	4:165606819:165630118:-1	Ybx3
ENSRNOT00000007461	335.31	528.127	142.494	0.269811	-1.88998	0.0497989	0.876169	Down	1.60412	0.434074	7:57253023:57679795:-1	Trhde
ENSRNOT00000007548	552.91	1011.48	94.341	0.0932703	-3.42244	0.000304436	0.036734	Down	7.33211	0.686083	7:14486638:14515212:1	Cyp4f39
ENSRNOT00000007610	18.8253	37.6507	0	0	#NAME?	0.0358919	0.76318	Down	0.607326	0	7:60305006:60309878:-1	RGD1306474
ENSRNOT00000007638	510.012	945.337	74.6866	0.0790053	-3.66191	0.000158221	0.0249541	Down	3.97529	0.314528	6:7961413:7980708:1	Abcg8
ENSRNOT00000007640	431.772	709.257	154.287	0.217533	-2.20069	0.0181698	0.544008	Down	3.36664	0.730963	3:5519990:5558166:1	Adamts13
ENSRNOT00000007655	264.025	95.653	432.396	4.52047	2.17647	0.0332322	0.737358	Up	0.564726	2.54156	6:22167919:22194250:1	Nlrc4
ENSRNOT00000007747	4492.13	953.477	8030.78	8.42262	3.07427	0.00139601	0.107134	Up	16.2657	137.144	7:60335969:60341264:-1	Lyz2
ENSRNOT00000007769	317.685	589.182	46.1878	0.0783931	-3.67313	0.00048084	0.0483981	Down	8.00649	0.623127	5:12135250:12199283:-1	Pcmtd1
ENSRNOT00000007789	7642.22	2616.21	12668.2	4.8422	2.27566	0.0234251	0.619454	Up	49.4913	239.923	8:52925175:52937972:-1	Nnmt
ENSRNOT00000007808	57.1546	9.15827	105.151	11.4815	3.52124	0.039722	0.801061	Up	0.114023	1.28372	3:109969152:110021149:-1	Fsip1
ENSRNOT00000007825	11497.8	19816.5	3179.09	0.160427	-2.64001	0.0149968	0.489228	Down	241.704	38.8283	6:104617730:104631355:-1	Slc10a1
ENSRNOT00000007866	19.8429	39.6858	0	0	#NAME?	0.0318959	0.722708	Down	0.750695	0.000491152	8:6140270:6203579:-1	Yap1
ENSRNOT00000007879	3749.71	6002.74	1496.68	0.249333	-2.00385	0.0267042	0.662807	Down	167.126	41.7343	13:112004140:112005052:-1	G0s2
ENSRNOT00000007947	939.506	1464.31	414.707	0.283211	-1.82005	0.0318659	0.722708	Down	17.2569	4.89975	6:104718512:104877980:1	Smoc1
ENSRNOT00000007968	68.7903	0	137.581	Inf	Inf	0.000207194	0.0290217	Up	1.91571e-11	6.16282	X:115561358:115568217:1	Alg13
ENSRNOT00000007977	89.7761	20.3517	159.2	7.82246	2.96762	0.0361167	0.76634	Up	0.117888	0.927095	4:25507463:25527087:1	Steap2
ENSRNOT00000008008	1935.49	861.895	3009.08	3.49124	1.80374	0.0345838	0.75153	Up	8.04069	28.1174	6:33689127:33691301:-1	Rhob
ENSRNOT00000008018	3279.59	5120.49	1438.7	0.280969	-1.83152	0.0389955	0.795656	Down	47.4128	13.3354	7:3098245:3102142:-1	Suox
ENSRNOT00000008212	73.7039	0	147.408	Inf	Inf	0.000133139	0.0217123	Up	2.33243e-05	3.83248	4:109467272:109470510:1	Reg3b
ENSRNOT00000008416	402.328	682.8	121.857	0.178467	-2.48627	0.00909413	0.361668	Down	5.12936	0.916407	6:99356509:99361909:1	Akap5
ENSRNOT00000008464	384.718	142.462	626.975	4.401	2.13783	0.024114	0.623229	Up	1.21686	5.34543	3:46291914:46323976:1	2019-03-07
ENSRNOT00000008478	631.071	1013.51	248.628	0.245312	-2.02731	0.0211971	0.587246	Down	4.92877	1.21212	3:162791355:162872831:-1	Sulf2
ENSRNOT00000008528	122.218	221.834	22.6025	0.10189	-3.29492	0.0115935	0.417904	Down	0.498407	0.0519954	3:111699087:111759714:1	Mga
ENSRNOT00000008613	129.719	0	259.438	Inf	Inf	1.85087e-06	0.000712939	Up	0	1.53758	7:29435444:29477947:1	Slc5a8
ENSRNOT00000008614	706.961	1083.73	330.193	0.304683	-1.71462	0.0464763	0.852491	Down	4.21742	1.28587	8:48094673:48157305:1	Pvrl1
ENSRNOT00000008705	531.159	0	1062.32	Inf	Inf	7.09755e-13	1.42164e-09	Up	0.000212102	9.04746	X:68627329:68635593:1	Yipf6
ENSRNOT00000008719	97.324	2.03517	192.613	94.6421	6.56441	0.000180131	0.0267712	Up	0.00554398	0.49772	4:49941304:50140762:1	Ptprz1
ENSRNOT00000008772	273.297	34.5979	511.996	14.7985	3.88738	0.000402894	0.0445336	Up	0.379417	5.64154	8:132996649:133002201:-1	Ccr1
ENSRNOT00000008989	922.556	1450.06	395.053	0.272439	-1.87599	0.027357	0.670275	Down	4.89972	1.33623	15:8890578:9086282:-1	Thrb
ENSRNOT00000009000	237.25	52.9144	421.586	7.96732	2.99409	0.00573447	0.27879	Up	0.268844	2.1547	3:92696313:92783658:-1	Cd44
ENSRNOT00000009061	478.535	742.837	214.233	0.288398	-1.79387	0.0472781	0.859328	Down	23.1447	6.70279	5:137371874:137372524:-1	Tmem125
ENSRNOT00000009132	761.96	135.339	1388.58	10.26	3.35896	0.000237387	0.0316069	Up	0.539652	5.55175	4:14318274:14490446:-1	Sema3c
ENSRNOT00000009221	1732.62	2758.67	706.575	0.256128	-1.96506	0.0213849	0.587571	Down	24.1931	6.20208	6:2808841:2860744:1	Galm
ENSRNOT00000009228	558.138	255.414	860.862	3.37046	1.75294	0.047499	0.859401	Up	0.766966	2.58625	5:47853818:47891127:1	Casp8ap2
ENSRNOT00000009299	271.565	449.773	93.3583	0.207568	-2.26835	0.0260413	0.655284	Down	3.15319	0.658237	10:86399827:86409348:1	Grb7
ENSRNOT00000009448	300.412	11.1934	589.631	52.6765	5.71909	1.82811e-06	0.000712939	Up	0.261573	14.3528	10:69412017:69413870:1	Ccl2
ENSRNOT00000009513	289.128	12.211	566.046	46.3553	5.53466	3.61324e-06	0.00129238	Up	0.119209	5.45734	6:105364668:105399500:1	Ttc9
ENSRNOT00000009564	1521.61	680.764	2362.46	3.4703	1.79506	0.0338485	0.739626	Up	7.25357	25.1907	3:122803772:122808558:1	Nop56
ENSRNOT00000009573	154.022	13.2286	294.816	22.2862	4.47808	0.000618823	0.0595915	Up	0.0670849	1.53082	10:31813814:31848379:1	Havcr1
ENSRNOT00000009683	582.885	1154.96	10.8099	0.00935956	-6.73934	2.50348e-09	2.38784e-06	Down	21.0973	0.206034	5:151776004:151779319:1	Nr0b2
ENSRNOT00000009838	1499.33	2305.85	692.817	0.300461	-1.73475	0.0398571	0.801061	Down	12.794	3.85057	13:48575091:48596515:1	Pm20d1
ENSRNOT00000009840	299.312	119.057	479.567	4.02803	2.01007	0.0422315	0.822119	Up	1.24372	5.04063	3:147813473:147819571:-1	Trib3
ENSRNOT00000009897	314.408	82.4244	546.392	6.629	2.72879	0.00679698	0.315357	Up	1.17921	7.80308	5:116996652:117038882:-1	Tm2d1
ENSRNOT00000009973	18.3165	36.6331	0	0	#NAME?	0.0380561	0.786075	Down	0.419653	6.75299e-15	5:48303366:48341571:1	Gabrr2
ENSRNOT00000010079	283.177	37.6507	528.703	14.0423	3.81171	0.000447942	0.0461395	Up	0.370597	5.19461	4:33743364:33761163:-1	Asns
ENSRNOT00000010141	60.4372	0	120.874	Inf	Inf	0.000451604	0.0461395	Up	0	0.783779	10:55712043:55735911:1	Aloxe3
ENSRNOT00000010151	41.2742	0	82.5484	Inf	Inf	0.00304011	0.185839	Up	0	0.891442	4:98203958:98305173:-1	Il23r
ENSRNOT00000010238	125.111	247.273	2.94816	0.0119227	-6.39015	5.48437e-05	0.0110898	Down	1.34022	0.0172468	4:151375572:151390263:-1	Lrtm2
ENSRNOT00000010242	387.05	622.762	151.339	0.243012	-2.0409	0.0305119	0.71147	Down	3.88206	0.943635	13:48745860:48766283:1	Slc45a3
ENSRNOT00000010243	206.03	66.143	345.917	5.22983	2.38676	0.0286377	0.691101	Up	1.0467	5.48589	8:2659871:2686160:1	Casp12
ENSRNOT00000010333	115.621	209.623	21.6198	0.103137	-3.27737	0.0134521	0.458127	Down	0.765401	0.0772385	5:79055521:79170765:1	Col27a1
ENSRNOT00000010381	749.458	1441.92	56.9977	0.0395291	-4.66094	1.81207e-06	0.000712939	Down	14.0469	0.55388	3:110306067:110324084:-1	Bmf
ENSRNOT00000010409	5631.11	9386.21	1876.01	0.199869	-2.32287	0.0156556	0.499037	Down	172.552	34.5409	8:85259982:85285983:1	Elovl5
ENSRNOT00000010541	599.84	194.359	1005.32	5.1725	2.37086	0.0081557	0.341332	Up	0.91609	4.73564	14:78213635:78253266:1	Evc
ENSRNOT00000010586	324.189	22.3869	625.992	27.9624	4.80542	1.65397e-05	0.00460124	Up	0.340666	9.55657	6:26797126:26809129:1	Cgref1
ENSRNOT00000010639	3094.51	6162.5	26.5334	0.00430563	-7.85956	1.42592e-11	1.68007e-08	Down	80.8994	0.348831	7:70807867:70815270:1	Stac3
ENSRNOT00000010688	546.031	237.097	854.965	3.60597	1.85039	0.0375506	0.784085	Up	0.931959	3.36005	5:147403948:147412705:-1	RGD1561149
ENSRNOT00000010701	871.309	409.069	1333.55	3.25996	1.70485	0.0444275	0.840961	Up	2.42451	7.90309	3:111877853:111941841:-1	Ehd4
ENSRNOT00000010760	3956.21	6268.32	1644.09	0.262285	-1.93079	0.0333543	0.738218	Down	100.649	26.4275	7:3383879:3386522:-1	Mettl7b
ENSRNOT00000010898	389.42	617.674	161.166	0.260924	-1.9383	0.0390082	0.795656	Down	3.40236	0.890181	4:89183768:89281222:-1	Fam13a
ENSRNOT00000010991	19.6544	0	39.3087	Inf	Inf	0.0338611	0.739626	Up	9.60599e-05	0.351197	8:68055977:68282590:-1	Map2k5
ENSRNOT00000011163	813.269	319.522	1307.02	4.09054	2.03229	0.018229	0.544965	Up	2.56554	10.5011	19:25391700:25394229:1	LOC100359539
ENSRNOT00000011224	44.7563	88.5299	0.982719	0.0111004	-6.49324	0.0056694	0.276755	Down	0.96791	0.00888854	3:9865657:9936617:-1	Fnbp1
ENSRNOT00000011314	539.039	1.01759	1077.06	1058.45	10.0477	4.14721e-12	6.38989e-09	Up	0.0302534	61.2856	5:16706082:16706909:-1	Rps20
ENSRNOT00000011432	6974.34	1691.23	12257.5	7.24767	2.85752	0.00476654	0.250516	Up	11.1399	80.8228	4:23112686:23135354:-1	Steap4
ENSRNOT00000011521	622.579	230.992	1014.17	4.39048	2.13438	0.0158208	0.500618	Up	1.78643	7.85499	4:113948514:113951847:1	Mogs
ENSRNOT00000011580	351.476	37.6507	665.301	17.6704	4.14326	9.00131e-05	0.0165409	Up	0.290285	5.0958	4:169147243:169181966:1	Emp1
ENSRNOT00000011651	234.32	53.932	414.707	7.68945	2.94288	0.00664508	0.310056	Up	0.559402	4.26915	4:34635506:34780193:-1	Ica1
ENSRNOT00000011694	80.8967	18.3165	143.477	7.83319	2.9696	0.04294	0.824629	Up	0.0893614	0.711127	5:144031402:144051600:1	Csf3r
ENSRNOT00000011814	219.61	399.911	39.3087	0.0982937	-3.34676	0.00285209	0.180783	Down	3.04515	0.301684	4:6297255:6330765:-1	Galnt11
ENSRNOT00000011904	185.047	17.2989	352.796	20.3941	4.35008	0.000436534	0.0458107	Up	0.147571	2.94338	7:94375020:94383024:1	Nov
ENSRNOT00000011922	59.4067	111.934	6.87903	0.0614559	-4.0243	0.0205337	0.573845	Down	0.244574	0.0146579	10:20844899:21265026:-1	Tenm2
ENSRNOT00000011945	1824.68	617.674	3031.69	4.90823	2.2952	0.00802465	0.340904	Up	5.43571	26.7188	4:78694447:78715683:1	Gpnmb
ENSRNOT00000012022	191.243	321.557	60.9286	0.18948	-2.39988	0.0307013	0.711745	Down	2.30323	0.440575	3:72447969:72457615:1	Ssrp1
ENSRNOT00000012056	256.633	438.579	74.6866	0.170292	-2.55392	0.0144081	0.476228	Down	3.42747	0.583982	15:51859462:51890832:-1	Sorbs3
ENSRNOT00000012093	317.06	524.056	110.064	0.210024	-2.25137	0.0224955	0.604002	Down	7.30238	1.53367	15:37543727:37663584:-1	Cryl1
ENSRNOT00000012154	3048.07	5028.91	1067.23	0.21222	-2.23637	0.0123145	0.435354	Down	54.1506	11.5011	10:64952119:64964862:1	Pipox
ENSRNOT00000012212	1305.05	0	2610.1	Inf	Inf	2.29624e-16	2.29969e-12	Up	0	14.0668	4:170659998:170740274:-1	Gucy2c
ENSRNOT00000012289	695.675	1256.72	134.632	0.10713	-3.22256	0.000428594	0.0458107	Down	4.62419	0.495362	3:2288667:2302782:1	Entpd8
ENSRNOT00000012436	79.8804	159.761	0	0	#NAME?	7.11707e-05	0.013976	Down	1.72228	0	10:105123857:105149971:-1	Srp68
ENSRNOT00000012463	254.242	12.211	496.273	40.6414	5.34488	1.10112e-05	0.00339315	Up	0.0551648	2.32219	5:151436464:151448328:1	Map3k6
ENSRNOT00000012494	70.0171	14.2462	125.788	8.82959	3.14235	0.0435654	0.833444	Up	0.220269	1.99474	3:6617751:6626284:-1	Fcnb
ENSRNOT00000012606	1525.57	711.292	2339.85	3.28958	1.7179	0.0418156	0.822119	Up	3.11709	10.266	3:159995064:160013274:1	Ttpal
ENSRNOT00000012757	200.136	353.102	47.1705	0.133589	-2.90413	0.00969302	0.374809	Down	1.56293	0.208114	6:107245820:107276755:1	Papln
ENSRNOT00000012819	11900.2	22051.1	1749.24	0.0793267	-3.65605	0.00133143	0.103769	Down	126.286	10.0288	5:19358734:19368431:-1	Cyp7a1
ENSRNOT00000012842	1978.52	677.712	3279.33	4.83883	2.27466	0.00880317	0.359119	Up	15.0603	72.9058	15:86153628:86198127:1	RGD1561252
ENSRNOT00000012960	37.3433	0	74.6866	Inf	Inf	0.00455806	0.243561	Up	0	0.881926	6:127696252:127711212:-1	Serpina12
ENSRNOT00000013092	498.403	870.035	126.771	0.145708	-2.77885	0.00290278	0.182808	Down	8.97071	1.30574	5:100439082:100647298:-1	Nfib
ENSRNOT00000013119	53.5582	0	107.116	Inf	Inf	0.000879577	0.0769342	Up	0	1.27815	8:5734348:5742243:1	Mmp10
ENSRNOT00000013145	192.345	41.721	342.969	8.22053	3.03923	0.00776351	0.336587	Up	1.37812	11.4941	4:79557854:79565097:1	LOC100912228
ENSRNOT00000013243	1861.15	853.754	2868.56	3.35993	1.74843	0.039823	0.801061	Up	8.4205	28.3113	8:36264750:36314811:-1	St3gal4
ENSRNOT00000013260	688.498	1095.94	281.058	0.256454	-1.96323	0.0240608	0.623229	Down	4.47792	1.14912	2:182897830:183031214:-1	LOC679811
ENSRNOT00000013322	827.239	303.24	1351.24	4.456	2.15575	0.0125541	0.440384	Up	4.40613	19.6439	5:154310453:154314955:1	Gale
ENSRNOT00000013343	2089.24	457.913	3720.57	8.12506	3.02238	0.0007572	0.06839	Up	1.79498	14.602	2:138819960:138833933:-1	Pcdh18
ENSRNOT00000013385	105.815	182.148	29.4816	0.161855	-2.62722	0.0466525	0.853379	Down	1.30438	0.207931	5:169200287:169212170:-1	Tas1r1
ENSRNOT00000013515	2896.35	962.636	4830.06	5.01754	2.32698	0.00912988	0.361668	Up	8.22336	41.3298	6:107460668:107467487:1	Acot2
ENSRNOT00000013516	454.111	91.5827	816.639	8.91696	3.15655	0.00104307	0.087784	Up	0.707433	6.33619	6:109913757:109935533:-1	Tgfb3
ENSRNOT00000013536	92.515	8.14068	176.889	21.7291	4.44155	0.00360279	0.206774	Up	0.0464156	1.07343	4:156253079:156264769:1	Clec4d
ENSRNOT00000013546	21.3693	42.7386	0	0	#NAME?	0.026631	0.662632	Down	0.216181	0.00134237	3:11207542:11248469:1	Prrc2b
ENSRNOT00000013639	439.105	104.811	773.4	7.37897	2.88342	0.0025567	0.164665	Up	0.524185	3.89326	10:65742343:65766050:-1	Sarm1
ENSRNOT00000013745	496.138	106.846	885.43	8.28693	3.05084	0.00125145	0.0999198	Up	2.93381	24.3153	X:1364786:1369384:-1	Timp1
ENSRNOT00000013851	382.777	86.4947	679.059	7.85087	2.97285	0.00247184	0.16023	Up	1.34986	10.658	1:157646173:157660008:1	Rab30
ENSRNOT00000013899	1517.55	558.654	2476.45	4.43289	2.14825	0.0120842	0.429922	Up	4.21085	18.7038	5:139475934:139505065:-1	Ctps1
ENSRNOT00000014022	286.913	513.881	59.9458	0.116653	-3.0997	0.00299504	0.185839	Down	1.51921	0.17673	2:77868432:78071309:1	Myo10
ENSRNOT00000014034	249.458	421.28	77.6348	0.184283	-2.44001	0.0195858	0.568216	Down	7.76283	1.42885	2:263895290:263975834:1	Ptger3
ENSRNOT00000014051	4884.7	7806.91	1962.49	0.251378	-1.99207	0.0326234	0.732174	Down	49.5942	12.4846	9:19804079:19880346:-1	Cyp39a1
ENSRNOT00000014118	163.811	39.6858	287.937	7.2554	2.85906	0.0152873	0.496281	Up	0.307635	2.22127	10:65304902:65329312:-1	Flot2
ENSRNOT00000014147	180.587	43.7562	317.418	7.25425	2.85883	0.0129088	0.44734	Up	0.276326	1.98929	16:63837216:64057434:1	Nrg1
ENSRNOT00000014152	105.884	186.218	25.5507	0.137208	-2.86556	0.0318177	0.722708	Down	2.39989	0.333619	1:131448737:131454689:-1	Nr2f2
ENSRNOT00000014191	658.979	1122.4	195.561	0.174235	-2.52089	0.00472217	0.249207	Down	9.86092	1.71625	7:117180812:117187367:-1	LOC680875
ENSRNOT00000014216	1225.21	559.672	1890.75	3.37832	1.75631	0.0371268	0.781144	Up	11.9777	40.5228	15:24153602:24165537:1	Lgals3
ENSRNOT00000014235	53920.2	101581	6258.94	0.0616149	-4.02058	0.0102184	0.38986	Down	563.164	34.7446	16:48937456:48981980:-1	Acsl1
ENSRNOT00000014248	225.478	25.4396	425.517	16.7265	4.06407	0.000453794	0.0461395	Up	0.461937	7.87755	16:54153086:54188118:1	Fgl1
ENSRNOT00000014267	60.8982	112.952	8.84447	0.0783029	-3.67479	0.0291981	0.697065	Down	1.96125	0.157328	2:88217188:88227479:1	Car1
ENSRNOT00000014496	3811.92	6880.91	742.935	0.10797	-3.21129	0.000723151	0.066348	Down	56.1075	6.06684	8:13838572:13861212:-1	RGD1309534
ENSRNOT00000014559	93.4629	6.10551	180.82	29.6159	4.8883	0.00180387	0.127224	Up	0.0601086	1.68856	2:45104305:45113131:1	Esm1
ENSRNOT00000014603	192.289	67.1606	317.418	4.72625	2.2407	0.042135	0.822119	Up	0.660239	3.13337	4:115004448:115015965:-1	Mthfd2
ENSRNOT00000014701	1176.48	95.653	2257.3	23.5989	4.56065	1.65465e-06	0.00067638	Up	2.90597	68.7873	2:93792601:93797305:1	Fabp4
ENSRNOT00000014934	930.815	268.642	1592.99	5.92977	2.56798	0.00322732	0.190127	Up	4.39038	26.0178	5:165405168:165408320:1	Srm
ENSRNOT00000015015	122.166	218.781	25.5507	0.116787	-3.09805	0.0165298	0.511735	Down	1.87433	0.220172	8:104106740:104176446:1	Tfdp2
ENSRNOT00000015035	19.3341	38.6682	0	0	#NAME?	0.0338436	0.739626	Down	0.862469	0	15:52211544:52214616:-1	Sftpc
ENSRNOT00000015081	31.5103	61.0551	1.96544	0.0321912	-4.95719	0.0357189	0.762739	Down	1.10589	0.0393172	2:179952227:180126897:1	Pdgfc
ENSRNOT00000015189	10366	18054	2677.91	0.148328	-2.75314	0.0102778	0.390099	Down	284.277	42.2119	9:4931028:4978892:-1	Sult1c3
ENSRNOT00000015199	63.5771	11.1934	115.961	10.3597	3.37291	0.0388178	0.795656	Up	0.350441	3.73705	10:70884531:70886355:1	Ccl4
ENSRNOT00000015281	765.741	1302.51	228.973	0.175794	-2.50804	0.00436838	0.237124	Down	12.0388	2.11703	5:61382351:61387358:1	Aldh1b1
ENSRNOT00000015308	559.946	246.256	873.637	3.54768	1.82688	0.039262	0.797904	Up	2.72968	9.67895	6:136150791:136156781:1	LOC103692719
ENSRNOT00000015316	333.262	638.026	28.4988	0.0446672	-4.48464	3.79014e-05	0.00872605	Down	11.6901	0.526622	4:85381889:85386231:-1	Inmt
ENSRNOT00000015351	409.651	20.3517	798.95	39.2572	5.29488	1.40826e-06	0.000587655	Up	0.785441	30.7395	2:190097554:190100276:-1	S100a9
ENSRNOT00000015363	206.204	391.77	20.6371	0.0526765	-4.2467	0.000381614	0.0429423	Down	1.53392	0.0792625	18:3861539:3940823:1	Lama3
ENSRNOT00000015473	404.298	23.4045	785.192	33.5488	5.06819	3.04487e-06	0.00115073	Up	1.28005	42.3304	2:190073815:190074354:1	S100a8
ENSRNOT00000015566	87.7771	161.796	13.7581	0.0850334	-3.55583	0.0155839	0.498636	Down	0.796797	0.067848	1:24003625:24056373:-1	Slc2a12
ENSRNOT00000015612	738.392	136.356	1340.43	9.83033	3.29724	0.000307244	0.0368509	Up	5.87177	57.7062	2:190007216:190008511:1	S100a6
ENSRNOT00000015667	3951.7	6263.24	1640.16	0.261871	-1.93307	0.0331372	0.736668	Down	35.5704	9.32575	5:134852875:134871775:-1	Faah
ENSRNOT00000015724	1175.48	1901.87	449.102	0.236138	-2.0823	0.0144847	0.477972	Down	16.4457	3.89104	19:85606:100424:1	Ces2e
ENSRNOT00000015756	4142.7	1465.32	6820.07	4.65431	2.21857	0.0160225	0.503112	Up	53.1088	247.487	2:115362799:115364729:1	Rpl22l1
ENSRNOT00000015767	1593.26	2998.82	187.699	0.062591	-3.9979	1.65284e-05	0.00460124	Down	18.9299	1.18813	7:125034764:125055976:1	Pnpla3
ENSRNOT00000015776	399.07	635.991	162.149	0.254954	-1.97169	0.0351944	0.755568	Down	10.5569	2.70172	5:154598758:154634686:1	Tcea3
ENSRNOT00000015810	5914.82	9540.88	2288.75	0.239889	-2.05956	0.031701	0.722708	Down	93.2329	22.3889	8:48716939:48723021:1	Slc37a4
ENSRNOT00000015888	457.403	771.33	143.477	0.186012	-2.42653	0.00917581	0.361794	Down	5.62083	1.04684	8:127735258:127753349:1	Vill
ENSRNOT00000015918	491.071	69.1958	912.946	13.1937	3.72177	0.000141409	0.0224795	Up	0.32137	4.2669	9:20546159:20621051:-1	Tnfrsf21
ENSRNOT00000015958	224.614	61.0551	388.174	6.35776	2.66852	0.0136019	0.459436	Up	1.9012	12.0708	2:189997129:189999604:1	S100a4
ENSRNOT00000015961	1129.81	1845.9	413.725	0.224132	-2.15758	0.0115323	0.41767	Down	21.529	4.83749	5:134331929:134348995:-1	LOC100911581
ENSRNOT00000016012	78.8093	11.1934	146.425	13.0813	3.70944	0.0160755	0.503112	Up	0.121333	1.57726	2:166226754:166255302:-1	B3galnt1
ENSRNOT00000016013	114.487	0	228.973	Inf	Inf	5.23959e-06	0.00172047	Up	2.18943e-05	3.02973	5:134886497:134905588:-1	Nsun4
ENSRNOT00000016036	2377.06	3950.27	803.864	0.203496	-2.29693	0.00891834	0.361543	Down	14.8805	3.03172	2:56426367:56489415:1	Lifr
ENSRNOT00000016138	111.216	210.64	11.7926	0.0559847	-4.15882	0.00318357	0.189061	Down	4.66659	0.254549	17:8570472:8607494:-1	Slc25a48
ENSRNOT00000016152	3058.65	828.314	5288.99	6.38525	2.67474	0.0032532	0.19109	Up	5.26617	33.6799	1:229003961:229019527:1	Fam111a
ENSRNOT00000016164	1059.94	406.016	1713.86	4.22116	2.07764	0.0147989	0.484247	Up	1.57118	6.64371	1:236031988:236313858:1	Pcsk5
ENSRNOT00000016205	6597.71	11113	2082.38	0.187382	-2.41595	0.014337	0.474662	Down	111.437	20.9099	7:143781781:143793970:-1	Csad
ENSRNOT00000016222	294.896	62.0727	527.72	8.50164	3.08774	0.00293932	0.18341	Up	0.780519	6.69785	8:112847499:112884062:-1	Acpp
ENSRNOT00000016262	802.919	288.994	1316.84	4.55664	2.18797	0.0115521	0.41767	Up	1.17715	5.36245	9:60039297:60070552:1	Slc39a10
ENSRNOT00000016390	5566.96	9169.46	1964.45	0.214239	-2.22271	0.020088	0.573845	Down	69.7017	14.9545	17:8400146:8429338:-1	Tgfbi
ENSRNOT00000016454	3878.78	7083.41	674.145	0.0951724	-3.39331	0.000404649	0.0445336	Down	111.973	10.6659	1:229066045:229080410:1	Glyat
ENSRNOT00000016468	60.0853	8.14068	112.03	13.7617	3.78259	0.0267023	0.662807	Up	0.0442976	0.62579	14:85957730:85968037:-1	Urgcp
ENSRNOT00000016540	31843.4	55147	8539.83	0.154856	-2.691	0.0383327	0.7883	Down	908.514	140.86	1:162381253:162385575:-1	Thrsp
ENSRNOT00000016541	28.9902	0	57.9804	Inf	Inf	0.0114404	0.417502	Up	0	0.608297	2:158097843:158103653:1	Ptx3
ENSRNOT00000016543	688.933	203.517	1174.35	5.77027	2.52864	0.00444185	0.239168	Up	1.12446	6.50156	16:22537056:22561496:-1	Lpl
ENSRNOT00000016555	20.8605	41.721	0	0	#NAME?	0.0282888	0.688486	Down	0.266106	0.000744158	15:52292765:52317219:-1	Dmtn
ENSRNOT00000016593	2119.04	3573.76	664.318	0.185888	-2.4275	0.00561029	0.274753	Down	37.0218	6.8895	1:229519506:229552842:1	Glyatl2
ENSRNOT00000016621	186.207	314.434	57.9804	0.184396	-2.43912	0.029379	0.69918	Down	2.12046	0.393935	2:157869392:158156150:-1	Veph1
ENSRNOT00000016629	358.697	573.918	143.477	0.249995	-2.00003	0.0362226	0.767766	Down	3.58264	0.898919	15:24942218:25083931:1	Peli2
ENSRNOT00000016688	22.3869	44.7737	0	0	#NAME?	0.0235968	0.619454	Down	0.37647	1.36832e-15	1:250559467:250630677:-1	Asah2
ENSRNOT00000016740	1041.22	1751.26	331.176	0.189107	-2.40273	0.00536415	0.265294	Down	7.41232	1.40564	1:244630377:244782706:1	Smarca2
ENSRNOT00000016891	3303.23	6356.85	249.611	0.0392664	-4.67056	3.14917e-06	0.00116811	Down	40.8304	1.607	2:243701962:243721816:1	Adh4
ENSRNOT00000016912	3417.51	5426.78	1408.24	0.259497	-1.94621	0.0294995	0.69926	Down	16.9079	4.39445	4:68849033:68996961:1	Mgam
ENSRNOT00000016930	237.755	397.876	77.6348	0.195123	-2.35754	0.0251845	0.642224	Down	4.78266	0.939503	1:234721974:234749447:-1	Nmrk1
ENSRNOT00000017181	177.238	20.3517	334.124	16.4175	4.03716	0.00101238	0.0858714	Up	0.212594	3.49383	7:120580743:120592095:1	Maff
ENSRNOT00000017226	233.403	86.4947	380.312	4.39694	2.1365	0.041684	0.822119	Up	0.778857	3.41638	19:34041219:34057159:1	Tmem184c
ENSRNOT00000017334	844.532	394.823	1294.24	3.27803	1.71283	0.0438657	0.835503	Up	4.38773	14.3828	4:157222385:157230647:-1	Emg1
ENSRNOT00000017448	600.813	279.836	921.79	3.29404	1.71986	0.049567	0.875508	Up	0.91305	3.01331	2:181331464:181367244:1	Map9
ENSRNOT00000017536	85.6373	151.62	19.6544	0.129629	-2.94754	0.040094	0.801061	Down	0.542225	0.068986	4:59445767:59809321:-1	Plxna4
ENSRNOT00000017624	138.804	42.7386	234.87	5.4955	2.45825	0.0422807	0.822119	Up	0.114126	0.625435	16:46731403:46926245:1	Tenm3
ENSRNOT00000017675	2839.21	4998.38	680.041	0.136052	-2.87777	0.00157782	0.115776	Down	104.043	14.1703	4:65110746:65141728:1	Akr1d1
ENSRNOT00000017727	34.9388	3.05276	66.8249	21.89	4.4522	0.041731	0.822119	Up	0.0133268	0.32058	7:124501988:124620703:-1	Scube1
ENSRNOT00000017746	18.6717	0	37.3433	Inf	Inf	0.0379029	0.786075	Up	1.32985e-06	0.592986	X:122724129:122781479:1	LOC100360218
ENSRNOT00000017805	1735.23	702.134	2768.32	3.94272	1.97919	0.0205415	0.573845	Up	4.3175	17.031	2:112868662:112933675:1	Nceh1
ENSRNOT00000018003	524.083	963.653	84.5138	0.0877015	-3.51126	0.000249119	0.0320903	Down	7.80854	0.6884	8:59507990:59529366:1	Hykk
ENSRNOT00000018064	34.8865	0	69.773	Inf	Inf	0.00590759	0.284445	Up	1.36547e-07	1.15347	5:155649217:155668057:1	Wnt4
ENSRNOT00000018118	108.991	23.4045	194.578	8.31373	3.0555	0.0222243	0.598354	Up	0.808242	6.85078	5:155693116:155709215:-1	Cdc42
ENSRNOT00000018221	4052.8	6514.58	1591.02	0.244225	-2.03372	0.0259084	0.652761	Down	61.5297	15.0489	1:263733519:263762785:-1	Cpn1
ENSRNOT00000018252	1097.83	1785.86	409.794	0.229465	-2.12365	0.0128185	0.447307	Down	33.2562	7.63656	17:13391467:13393243:-1	Gadd45g
ENSRNOT00000018343	5324.42	8693.23	1955.61	0.224958	-2.15227	0.0231903	0.615234	Down	118.739	26.7384	2:225827504:225847874:1	Gclm
ENSRNOT00000018394	579.843	891.405	268.282	0.300966	-1.73233	0.0489247	0.870461	Down	9.66948	2.91102	10:94968836:94979259:-1	Polg2
ENSRNOT00000018603	1401.62	617.674	2185.57	3.53838	1.82309	0.0310353	0.715898	Up	9.26109	32.7986	8:97075160:97083120:-1	Tmed3
ENSRNOT00000018628	19.8429	39.6858	0	0	#NAME?	0.0318959	0.722708	Down	0.0983779	4.18766e-11	2:149535484:149564113:-1	Igsf10
ENSRNOT00000018688	1299.51	393.805	2205.22	5.59977	2.48537	0.00405429	0.224951	Up	4.4164	24.7434	1:103172987:103177417:1	Tmem86a
ENSRNOT00000018691	28.9663	55.9672	1.96544	0.0351177	-4.83166	0.0456033	0.842651	Down	1.14888	0.0394415	7:12516357:12518684:-1	Gpx4
ENSRNOT00000018776	19841	137.374	39544.6	287.861	8.16923	6.95788e-08	4.80573e-05	Up	3.1276	903.957	3:11414186:11417546:-1	Lcn2
ENSRNOT00000018795	9001.62	16687.4	1315.86	0.0788536	-3.66468	0.000785608	0.0702488	Down	267.108	21.0864	19:50246402:50317891:1	Hsd17b2
ENSRNOT00000018990	998.863	1860.15	137.581	0.0739623	-3.75707	4.19394e-05	0.00923054	Down	10.0643	0.743938	1:150797084:150976194:1	Nox4
ENSRNOT00000019062	545.721	190.288	901.153	4.73572	2.24358	0.012887	0.44734	Up	2.26182	10.7378	9:29634179:29647903:-1	Ogfrl1
ENSRNOT00000019109	36.378	1.01759	71.7385	70.4987	6.13953	0.0132574	0.453923	Up	0.0218641	1.10592	9:81427730:81434102:1	Cxcr2
ENSRNOT00000019245	343.977	87.5123	600.441	6.86122	2.77846	0.00513682	0.258952	Up	0.11735	0.804796	1:114453275:114653783:1	Herc2
ENSRNOT00000019311	39.3087	0	78.6175	Inf	Inf	0.00371976	0.211332	Up	0	1.91073	1:104147206:104157855:-1	Csrp3
ENSRNOT00000019346	242153	1871.34	482434	257.802	8.01012	0.00533957	0.264732	Up	8.30501	2143.86	4:154309426:154359137:1	LOC100911545
ENSRNOT00000019361	56.5586	3.05276	110.064	36.0541	5.17209	0.00710919	0.319276	Up	0.0393101	1.60486	17:22137324:22143324:-1	Edn1
ENSRNOT00000019415	91.8842	0	183.768	Inf	Inf	2.87698e-05	0.00729441	Up	0	2.60137	9:46840992:46881264:1	Il1r2
ENSRNOT00000019501	901.119	141.444	1660.79	11.7417	3.55357	9.81665e-05	0.017556	Up	1.44932	17.0086	2:251529354:251532312:-1	Cyr61
ENSRNOT00000019568	72.7573	145.515	0	0	#NAME?	0.000133331	0.0217123	Down	4.35227	0.000184138	1:141666119:141672711:-1	Arpin
ENSRNOT00000019772	4500.61	932.108	8069.1	8.65683	3.11384	0.00123627	0.099849	Up	2.26971	19.6832	9:78900113:78969013:-1	Fn1
ENSRNOT00000019787	4125	1637.29	6612.71	4.03881	2.01393	0.0276003	0.675011	Up	13.6829	55.3439	3:154786215:154813464:1	Lbp
ENSRNOT00000019848	536.284	155.691	916.877	5.8891	2.55805	0.00520404	0.260592	Up	1.53156	9.01262	9:81569289:81586469:-1	Tmbim1
ENSRNOT00000019853	29.9729	0	59.9458	Inf	Inf	0.0102185	0.38986	Up	1.05515e-05	1.31019	7:117709168:117721955:-1	Cyhr1
ENSRNOT00000019893	80.6875	6.10551	155.27	25.431	4.66852	0.00403928	0.224741	Up	0.0178475	0.450718	1:5240180:5313054:1	Shprh
ENSRNOT00000019916	56.6807	10.1759	103.185	10.1402	3.34202	0.0493067	0.872044	Up	0.230887	2.28461	5:59416076:59446647:1	Glipr2
ENSRNOT00000019933	3655.13	6074.98	1235.28	0.203338	-2.29805	0.0116774	0.419174	Down	158.085	32.1848	8:49106374:49109981:-1	Ttc36
ENSRNOT00000019956	2061.22	3238.97	883.464	0.272761	-1.87429	0.028956	0.697065	Down	15.1982	4.14975	1:264741911:264753397:1	Sema4g
ENSRNOT00000020015	5331.43	8471.4	2191.46	0.25869	-1.95071	0.0383211	0.7883	Down	63.7548	16.5144	1:16910069:16930481:1	Aldh8a1
ENSRNOT00000020043	3321.63	145.515	6497.74	44.6535	5.4807	1.47597e-07	8.95868e-05	Up	0.849275	37.9985	10:58810058:58834538:-1	Slc13a5
ENSRNOT00000020144	576.365	0	1152.73	Inf	Inf	2.85038e-13	7.13663e-10	Up	4.00234e-10	9.06069	9:47165342:47174710:1	Il1rl1
ENSRNOT00000020192	6936.73	11312.5	2560.96	0.226384	-2.14316	0.0294612	0.69918	Down	193.929	43.9567	10:14216155:14230515:1	Hagh
ENSRNOT00000020204	39.6858	79.3716	0	0	#NAME?	0.00338114	0.196302	Down	1.19508	3.17336e-05	17:57040023:57088502:1	Crem
ENSRNOT00000020233	9875.63	17569.6	2181.64	0.124171	-3.0096	0.00515835	0.258952	Down	157.575	19.589	10:14240219:14243597:1	Igfals
ENSRNOT00000020335	1368.73	2196.97	540.495	0.246019	-2.02316	0.0173798	0.529858	Down	36.1998	8.91746	5:76110738:76129441:-1	Ptgr1
ENSRNOT00000020345	43.2571	1.01759	85.4965	84.019	6.39264	0.0069337	0.315357	Up	0.00856496	0.708356	1:94780650:94784451:-1	LOC365238
ENSRNOT00000020366	153.597	45.7913	261.403	5.70857	2.51313	0.0332418	0.737358	Up	0.422207	2.4312	5:78334284:78356460:1	Bspry
ENSRNOT00000020379	312.3	102.776	521.824	5.07729	2.34406	0.0183013	0.545672	Up	0.855359	4.34657	10:58951842:58973020:-1	Smtnl2
ENSRNOT00000020401	363.259	582.059	144.46	0.248187	-2.0105	0.0349034	0.753356	Down	5.84159	1.44936	2:202798198:202816562:-1	Fam46c
ENSRNOT00000020528	1405.69	195.376	2616	13.3895	3.74303	4.28272e-05	0.00923054	Up	1.7015	22.7837	1:21851660:21854773:-1	Ctgf
ENSRNOT00000020625	3696.75	5980.35	1413.15	0.236299	-2.08132	0.0215119	0.590252	Down	88.0894	20.8339	5:78368867:78379346:-1	Alad
ENSRNOT00000020826	81.3184	14.2462	148.391	10.4162	3.38075	0.0238503	0.622845	Up	0.176922	1.852	5:25349928:25353661:1	Gem
ENSRNOT00000020853	924.568	420.263	1428.87	3.39995	1.76551	0.037185	0.781548	Up	3.47298	11.8069	1:105113595:105200259:1	Prmt3
ENSRNOT00000020880	24.094	1.01759	47.1705	46.3553	5.53466	0.0461914	0.85038	Up	0.018144	0.61847	9:88521193:88534710:-1	Tm4sf20
ENSRNOT00000020908	106.904	16.2814	197.526	12.1321	3.60075	0.0092658	0.364625	Up	0.213242	2.65783	19:37235001:37236649:1	Nol3
ENSRNOT00000021073	1481.79	708.239	2255.34	3.18443	1.67104	0.0472662	0.859328	Up	14.0755	44.8922	16:19385736:19399903:-1	Tpm4
ENSRNOT00000021133	66.9166	120.075	13.7581	0.114579	-3.12559	0.0478017	0.861807	Down	0.945108	0.110954	3:155160481:155262941:1	Ppp1r16b
ENSRNOT00000021155	2496.76	4598.47	395.053	0.0859097	-3.54104	0.000136907	0.0221149	Down	44.8924	3.85858	5:162808646:162843383:1	Dhrs3
ENSRNOT00000021223	330.85	554.584	107.116	0.193147	-2.37223	0.015819	0.500618	Down	2.47897	0.480921	1:78459543:78521999:-1	Arhgap35
ENSRNOT00000021271	284.857	78.3541	491.359	6.27101	2.6487	0.00977485	0.37652	Up	0.392087	2.45761	19:52270927:52282877:-1	Kcng4
ENSRNOT00000021445	594.93	940.249	249.611	0.265473	-1.91336	0.0300785	0.706511	Down	10.1087	2.68353	4:120778580:120784807:-1	Abtb1
ENSRNOT00000021452	903.765	1414.44	393.087	0.27791	-1.84731	0.029809	0.704096	Down	15.028	4.17802	3:156339004:156340913:-1	Mafb
ENSRNOT00000021455	168.46	52.9144	284.006	5.36726	2.42419	0.0347328	0.75153	Up	0.402627	2.14596	1:78710539:78724794:1	Slc1a5
ENSRNOT00000021496	1412.41	2165.42	659.404	0.304515	-1.71541	0.0417623	0.822119	Down	8.4451	2.57489	1:243276403:243398536:1	Kank1
ENSRNOT00000021523	274.848	440.614	109.082	0.247567	-2.01411	0.0455168	0.842317	Down	2.93341	0.728198	7:145435536:145450353:-1	LOC100912282
ENSRNOT00000021534	881.599	350.049	1413.15	4.037	2.01328	0.0186928	0.553052	Up	5.13052	20.7381	9:119181083:119190698:-1	Tgif1
ENSRNOT00000021612	5056.8	988.075	9125.53	9.23566	3.20721	0.00109054	0.0911094	Up	5.61106	51.8708	5:25391115:25443718:1	Cdh17
ENSRNOT00000021650	803.704	1252.65	354.761	0.283209	-1.82006	0.0333426	0.738218	Down	39.4221	11.1887	10:14258380:14259336:1	Nme3
ENSRNOT00000021804	650.141	291.029	1009.25	3.46787	1.79405	0.0392777	0.797904	Up	1.77054	6.15483	2:9537642:9578310:-1	Polr3g
ENSRNOT00000021863	52.5755	0	105.151	Inf	Inf	0.000969161	0.0826055	Up	2.82199e-07	0.762385	8:71372977:71533069:-1	Trip4
ENSRNOT00000022068	241.171	453.843	28.4988	0.0627945	-3.99322	0.00043714	0.0458107	Down	5.74834	0.355851	1:48273639:48300495:1	Slc22a1
ENSRNOT00000022144	1438.97	589.182	2288.75	3.88463	1.95778	0.0211774	0.587246	Up	2.65202	10.3143	2:28049217:28061029:1	Enc1
ENSRNOT00000022309	12239	3686.71	20791.4	5.63955	2.49558	0.0220327	0.59606	Up	37.4517	211.469	1:263246248:263269762:-1	Got1
ENSRNOT00000022485	504.732	923.967	85.4965	0.092532	-3.4339	0.000347405	0.0405276	Down	7.01211	0.650736	9:94569286:94601852:-1	Ngef
ENSRNOT00000022519	83.092	3.05276	163.131	53.4374	5.73978	0.00094986	0.0816554	Up	0.0591004	3.0068	18:64053472:64061472:-1	Fam210a
ENSRNOT00000022522	825.015	1349.32	300.712	0.222862	-2.16578	0.0121834	0.431917	Down	6.64128	1.48326	5:152573758:152589719:-1	Extl1
ENSRNOT00000022585	292.516	468.089	116.944	0.249832	-2.00097	0.0440339	0.836866	Down	4.46716	1.1153	3:12262822:12292663:1	Angptl2
ENSRNOT00000022676	1543.61	559.672	2527.55	4.51613	2.17509	0.0111634	0.411793	Up	5.72881	25.891	9:66495832:66519769:1	Nop58
ENSRNOT00000022683	361.558	568.83	154.287	0.271235	-1.88238	0.0474829	0.859401	Down	3.41536	0.92999	1:32251714:32272476:-1	Tert
ENSRNOT00000022809	325.239	513.881	136.598	0.265816	-1.9115	0.0487252	0.86907	Down	7.41553	1.97564	17:43661276:43669327:1	Hfe
ENSRNOT00000022810	94.341	0	188.682	Inf	Inf	2.36667e-05	0.00615643	Up	0.000111833	3.46542	17:43661276:43669327:1	Hfe
ENSRNOT00000022881	849.447	1312.68	386.208	0.294213	-1.76507	0.0380371	0.786075	Down	11.1862	3.29583	17:43661222:43669985:1	Hfe
ENSRNOT00000023029	524.244	169.937	878.551	5.16987	2.37013	0.00930629	0.3655	Up	1.35926	7.05774	9:50247692:50373284:1	Nck2
ENSRNOT00000023033	83.3187	16.2814	150.356	9.23485	3.20709	0.0291361	0.697065	Up	0.116135	1.0886	17:67887939:67945037:-1	Klf6
ENSRNOT00000023130	126.71	225.904	27.5161	0.121805	-3.03736	0.0171933	0.525774	Down	2.46121	0.303599	19:37476083:37481326:1	Hsd11b2
ENSRNOT00000023149	4402.65	7403.95	1401.36	0.189272	-2.40147	0.0101329	0.388815	Down	22.5748	4.27741	17:31236015:31403685:1	Slc22a23
ENSRNOT00000023187	146.457	30.5276	262.386	8.59505	3.10351	0.0115378	0.41767	Up	0.282909	2.46959	5:153197459:153232687:1	Rhd
ENSRNOT00000023189	444.304	64.1079	824.501	12.8612	3.68495	0.000201264	0.0288469	Up	0.557089	7.12884	1:190889701:190914610:-1	Cdr2
ENSRNOT00000023241	2842.94	5044.17	641.715	0.127219	-2.97461	0.00114337	0.0938595	Down	36.2816	4.61869	17:43567528:43584152:-1	Slc17a2
ENSRNOT00000023350	18084.7	30645.6	5523.86	0.18025	-2.47193	0.0330182	0.735818	Down	291.063	52.5287	3:114176309:114207366:1	Sord
ENSRNOT00000023446	598.927	198.429	999.425	5.03668	2.33247	0.0091569	0.361761	Up	1.9369	9.76541	17:80250521:80311981:1	Pter
ENSRNOT00000023457	31.9384	0	63.8767	Inf	Inf	0.0081714	0.341332	Up	7.81873e-11	2.20284	1:80415686:80416273:-1	Bloc1s3
ENSRNOT00000023504	637.285	1003.34	271.23	0.270328	-1.88722	0.0309559	0.715162	Down	10.3182	2.79016	1:214248837:214252456:-1	Irf7
ENSRNOT00000023592	757.328	1212.96	301.695	0.248726	-2.00737	0.0202151	0.573845	Down	28.4983	7.09667	9:93061900:93068130:1	LOC100362216
ENSRNOT00000023664	484.071	205.552	762.59	3.70996	1.8914	0.0367801	0.777116	Up	2.94581	10.9578	1:237893966:237910012:-1	Anxa1
ENSRNOT00000023945	7602.41	3017.14	12187.7	4.03948	2.01417	0.0427634	0.823716	Up	18.9763	76.7532	17:70010794:70020982:1	Net1
ENSRNOT00000024011	1763.48	2982.54	544.426	0.182538	-2.45373	0.00478442	0.250516	Down	24.9358	4.55813	4:122365093:122377659:1	Klf15
ENSRNOT00000024030	1254.11	324.61	2183.6	6.72685	2.74993	0.00165249	0.119925	Up	6.2691	42.2541	8:50222896:50228369:-1	Tagln
ENSRNOT00000024054	875.323	1532.48	218.164	0.142359	-2.81239	0.00145314	0.108606	Down	14.3516	2.04206	5:167142182:167174203:1	Slc2a5
ENSRNOT00000024063	955.124	1773.65	136.598	0.0770151	-3.69871	5.39731e-05	0.0110314	Down	32.7002	2.52641	5:157759416:157768301:1	Akr7a2
ENSRNOT00000024128	159.25	31.5451	286.954	9.09661	3.18533	0.00827737	0.34469	Up	0.166972	1.49961	16:73372007:73410777:-1	Sfrp1
ENSRNOT00000024160	1480.44	2694.57	266.317	0.0988348	-3.33884	0.000202017	0.0288469	Down	43.4447	4.30196	5:157801163:157813756:1	Akr7a3
ENSRNOT00000024455	2091.62	3665.34	517.893	0.141295	-2.82322	0.00150965	0.11158	Down	37.0129	5.24067	2:210045161:210068502:1	Slc16a4
ENSRNOT00000024932	749.027	1216.01	282.04	0.231938	-2.10819	0.0151715	0.49332	Down	4.93773	1.14628	5:168086998:168123395:-1	Per3
ENSRNOT00000024947	2412.5	167.902	4657.1	27.7371	4.79375	1.09211e-06	0.000465426	Up	1.94417	54.0451	18:63130542:63140181:1	Tubb6
ENSRNOT00000025097	224.21	381.594	66.8249	0.17512	-2.51358	0.0192895	0.564158	Down	2.70833	0.476543	1:167906061:167911961:-1	Olr59
ENSRNOT00000025158	43.2474	86.4947	0	0	#NAME?	0.00233843	0.153871	Down	0.366092	5.58717e-06	3:60051546:60105242:-1	Gpr155
ENSRNOT00000025196	5279.25	2041.28	8517.22	4.1725	2.06091	0.0290196	0.697065	Up	20.171	84.2685	1:224906554:224921092:-1	Slc3a2
ENSRNOT00000025258	242.624	22.3869	462.861	20.6755	4.36985	0.000163199	0.0253177	Up	0.251696	5.31432	1:254726969:254735548:-1	Ankrd1
ENSRNOT00000025384	64.4727	6.10551	122.84	20.1195	4.33052	0.0119152	0.426777	Up	0.0251725	0.510315	2:187347602:187352969:1	Nes
ENSRNOT00000025394	666.21	1114.26	218.164	0.195793	-2.3526	0.0078778	0.33861	Down	3.20327	0.629048	16:7222067:7250924:-1	Stab1
ENSRNOT00000025523	1023.41	1600.66	446.154	0.278731	-1.84305	0.0294271	0.69918	Down	25.9913	7.25994	2:198010349:198016898:-1	Car14
ENSRNOT00000025582	34.3952	0	68.7903	Inf	Inf	0.00622866	0.29486	Up	0	1.36126	9:93731436:93735636:-1	Nppc
ENSRNOT00000025653	110.338	216.746	3.93087	0.0181359	-5.78501	0.000242631	0.031973	Down	3.07699	0.0614939	1:156294519:156296161:-1	Crebzf
ENSRNOT00000025794	17574.5	5594.68	29554.3	5.28257	2.40124	0.0369512	0.778268	Up	55.0448	291.122	1:47914759:47921587:-1	Sod2
ENSRNOT00000025845	2222.36	3466.91	977.805	0.282039	-1.82603	0.0338412	0.739626	Down	21.9759	6.20793	1:252816538:252849756:-1	Lipa
ENSRNOT00000025848	749.891	1180.4	319.384	0.270573	-1.88591	0.0285955	0.690914	Down	19.1591	5.19909	19:54731859:54761670:-1	Car5a
ENSRNOT00000025856	48.6969	3.05276	94.341	30.9036	4.9497	0.0134077	0.458127	Up	0.0534808	1.4514	1:252807065:252808380:-1	Ch25h
ENSRNOT00000025881	4641.2	7590.17	1692.24	0.222952	-2.1652	0.020154	0.573845	Down	38.0736	8.4984	18:55955389:55992885:-1	Ndst1
ENSRNOT00000025990	517.45	805.927	228.973	0.284112	-1.81547	0.0424957	0.822405	Down	12.4935	3.55354	5:136112417:136127976:1	Tmem53
ENSRNOT00000026075	144.204	243.203	45.2051	0.185874	-2.4276	0.0423121	0.822119	Down	2.80371	0.519934	2:206219419:206222248:-1	Olfml3
ENSRNOT00000026159	26.042	0	52.0841	Inf	Inf	0.0160629	0.503112	Up	0	1.07032	8:130120523:130127392:-1	Cck
ENSRNOT00000026251	62.8985	114.987	10.8099	0.0940097	-3.41105	0.0375569	0.784085	Down	0.724855	0.068905	1:100393303:100408083:1	Syt3
ENSRNOT00000026258	1986.39	3115.85	856.931	0.275023	-1.86237	0.0296155	0.70118	Down	15.1933	4.18435	7:123043503:123058604:1	Tef
ENSRNOT00000026316	8405.81	13487.1	3324.54	0.246498	-2.02035	0.0455431	0.842317	Down	68.9366	17.0113	1:219759183:219859848:1	Pc
ENSRNOT00000026350	68.6521	135.339	1.96544	0.0145223	-6.10558	0.00142884	0.108243	Down	1.30939	0.0230306	1:41323194:41590697:1	Esr1
ENSRNOT00000026467	50.6274	1.01759	100.237	98.5051	6.62213	0.00349596	0.201218	Up	0.0148152	1.11563	9:82436458:82444668:1	Dnajb2
ENSRNOT00000026558	361.68	117.022	606.337	5.18138	2.37334	0.0141248	0.470616	Up	1.22805	6.35949	9:97355924:97367445:1	Ackr3
ENSRNOT00000026564	106.657	30.5276	182.786	5.98756	2.58197	0.0497018	0.875574	Up	0.16668	0.994302	1:40529045:40719391:1	Mthfd1l
ENSRNOT00000026588	7584.6	14310.3	858.896	0.0600194	-4.05843	0.000175384	0.0264131	Down	49.8441	2.99676	16:7714465:7758189:-1	Hacl1
ENSRNOT00000026754	190.833	68.1782	313.487	4.59806	2.20102	0.0459858	0.848154	Up	0.506217	2.3178	1:143702853:143751789:-1	Hdgfrp3
ENSRNOT00000026755	347.417	546.443	148.391	0.271557	-1.88067	0.0493273	0.872044	Down	11.7515	3.1936	1:198210525:198213816:1	Ypel3
ENSRNOT00000026871	320.747	50.8793	590.614	11.6081	3.53707	0.000699164	0.0657476	Up	0.796281	9.22716	7:11646269:11648322:-1	Gadd45b
ENSRNOT00000027022	115.469	0	230.939	Inf	Inf	4.88743e-06	0.00165924	Up	0	3.24268	1:198284473:198288113:1	Doc2a
ENSRNOT00000027117	151.335	28.4924	274.179	9.62287	3.26647	0.00780365	0.336869	Up	0.156292	1.52512	19:38162515:38179149:1	Slc7a6
ENSRNOT00000027160	443.843	725.538	162.149	0.223487	-2.16174	0.0196027	0.568216	Down	8.06511	1.80451	1:266422132:266428239:-1	Cyp17a1
ENSRNOT00000027220	1663.1	2687.44	638.767	0.237686	-2.07287	0.0154376	0.497131	Down	24.7239	5.88858	9:98438439:98459080:1	Scly
ENSRNOT00000027237	91.4974	6.10551	176.889	28.9721	4.85659	0.00203667	0.139707	Up	0.0127237	0.398469	4:56711049:56738791:1	Flnc
ENSRNOT00000027263	20.8605	41.721	0	0	#NAME?	0.0282888	0.688486	Down	0.0796335	0	2:211183311:211207465:-1	Celsr2
ENSRNOT00000027315	860.235	106.846	1613.62	15.1023	3.91669	2.58588e-05	0.00664042	Up	0.642211	9.71273	15:34378148:34392066:-1	Tgm1
ENSRNOT00000027340	259.947	459.949	59.9458	0.130332	-2.93974	0.00548933	0.269691	Down	1.72481	0.224222	18:30172740:30215896:1	Pcdha13
ENSRNOT00000027411	788.754	1240.44	337.073	0.271737	-1.87972	0.0284807	0.690248	Down	5.59953	1.52445	8:117358787:117366096:-1	Wdr6
ENSRNOT00000027493	209.291	399.911	18.6717	0.0466895	-4.42076	0.000238274	0.0316069	Down	2.67631	0.126399	2:211246068:211322719:-1	5330417C22Rik
ENSRNOT00000027506	923.863	1526.38	321.349	0.21053	-2.2479	0.00905721	0.361668	Down	5.35797	1.12891	9:98555169:98597359:-1	Per2
ENSRNOT00000027544	146.131	269.66	22.6025	0.0838186	-3.57659	0.00449354	0.241302	Down	2.46431	0.206808	18:27491845:27520295:-1	Gfra3
ENSRNOT00000027552	1330.5	596.305	2064.69	3.46248	1.7918	0.0337434	0.739626	Up	7.84411	27.191	8:117486083:117545564:1	Prkar2a
ENSRNOT00000027584	193.906	362.26	25.5507	0.0705313	-3.82559	0.00125115	0.0999198	Down	4.10866	0.294915	8:117576788:117599848:1	Ip6k2
ENSRNOT00000027756	8664.89	15674.9	1654.9	0.105576	-3.24364	0.00231843	0.153261	Down	234.096	24.7531	1:226114413:226152524:-1	Fads2
ENSRNOT00000027802	1242.12	1890.67	593.562	0.313942	-1.67143	0.0467236	0.853899	Down	18.9204	5.94795	15:34552410:34561727:1	Khnyn
ENSRNOT00000027834	14870.7	25681.8	4059.61	0.158073	-2.66133	0.0186371	0.553039	Down	152.593	24.1486	1:226234074:226249138:1	Fads1
ENSRNOT00000027891	47.6619	0	95.3237	Inf	Inf	0.00158375	0.115776	Up	0	1.16439	1:220826560:220835066:1	Fosl1
ENSRNOT00000027963	400.223	674.659	125.788	0.186447	-2.42316	0.0108812	0.404362	Down	8.725	1.62939	8:21895524:21901829:-1	Angptl6
ENSRNOT00000027989	1168.42	1833.69	503.152	0.274393	-1.86568	0.0273394	0.670275	Down	48.529	13.3236	10:15686008:15689325:-1	Snrnp25
ENSRNOT00000027998	39.835	2.03517	77.6348	38.1466	5.25348	0.0177227	0.536231	Up	0.0621863	2.02499	1:87190381:87191588:-1	LOC103690068
ENSRNOT00000028033	11727.1	19748.3	3705.83	0.187653	-2.41386	0.0253161	0.643505	Down	165.423	31.0816	10:89285855:89296213:1	G6pc
ENSRNOT00000028034	1199.2	246.256	2152.15	8.73951	3.12755	0.000430385	0.0458107	Up	1.82287	15.9581	8:21984914:21995806:-1	S1pr2
ENSRNOT00000028067	687.01	1066.43	307.591	0.288431	-1.7937	0.0382317	0.787841	Down	20.2122	5.83456	10:89358376:89366626:1	Ifi35
ENSRNOT00000028131	40.686	80.3892	0.982719	0.0122245	-6.35408	0.00833568	0.346398	Down	0.615255	0.0108027	1:82550892:82580761:-1	Axl
ENSRNOT00000028174	1687.91	750.978	2624.84	3.49523	1.80539	0.0334253	0.738973	Up	7.99628	28	10:89539556:89550500:1	Rdm1
ENSRNOT00000028179	473.179	0	946.358	Inf	Inf	2.63988e-12	4.40639e-09	Up	0	37.0673	10:89635675:89636193:1	Sap18
ENSRNOT00000028186	26.4398	51.8968	0.982719	0.018936	-5.72272	0.0346591	0.75153	Down	0.479042	0.0122155	10:16699072:16731898:-1	Crebrf
ENSRNOT00000028196	890.877	1637.29	144.46	0.0882307	-3.50258	0.000119501	0.0201144	Down	22.5079	1.99101	1:83103925:83119193:1	Cyp2b2
ENSRNOT00000028546	1690.51	2738.32	642.698	0.234705	-2.09108	0.0146738	0.48104	Down	32.6506	7.67493	1:101687855:101692846:1	Dbp
ENSRNOT00000028624	1222.59	1897.8	547.374	0.288426	-1.79373	0.0334633	0.738996	Down	72.2639	20.8842	1:89484199:89488223:-1	Fxyd1
ENSRNOT00000028651	33.0715	66.143	0	0	#NAME?	0.00684226	0.315357	Down	0.387047	0.00190026	1:221872220:221908049:1	Nrxn2
ENSRNOT00000028749	1000.1	1588.45	411.759	0.259221	-1.94775	0.0218982	0.593534	Down	33.4106	8.67228	1:222311253:222451484:1	Macrod1
ENSRNOT00000028893	699.064	307.311	1090.82	3.54956	1.82764	0.0346514	0.75153	Up	2.14043	7.60558	3:125458692:125470413:-1	Trmt6
ENSRNOT00000029001	1981.8	3307.15	656.456	0.198496	-2.33282	0.00734614	0.324819	Down	37.3707	7.43019	10:103832838:103848035:-1	Fads6
ENSRNOT00000029266	249.162	88.5299	409.794	4.62887	2.21066	0.0329538	0.735818	Up	0.701793	3.27044	16:74752655:74779184:1	Ckap2
ENSRNOT00000029626	1821	2869.59	772.417	0.269173	-1.89339	0.0265499	0.662632	Down	25.5673	6.88742	17:43518761:43543185:-1	Slc17a3
ENSRNOT00000029660	235.634	73.2661	398.001	5.43227	2.44155	0.0211753	0.587246	Up	1.54198	8.436	3:148215540:148216718:1	Id1
ENSRNOT00000029922	62.0727	124.145	0	0	#NAME?	0.000358754	0.0415366	Down	0.831996	0.000402512	3:93495106:93647680:1	Abtb2
ENSRNOT00000030082	952.541	1651.54	253.541	0.153518	-2.70352	0.00202295	0.139243	Down	16.5817	2.55317	7:126619196:126681752:1	Ppara
ENSRNOT00000030119	41.2742	0	82.5484	Inf	Inf	0.00304011	0.185839	Up	2.52963e-07	1.05121	3:162357356:162470065:1	Eya2
ENSRNOT00000030135	4000.45	7474.16	526.737	0.0704744	-3.82676	9.70886e-05	0.0175197	Down	60.9248	4.29756	13:98451637:98478327:-1	Adck3
ENSRNOT00000030221	671.688	0	1343.38	Inf	Inf	5.45694e-14	2.18605e-10	Up	0.00789217	80.5527	8:81949877:81968589:1	LOC100360828
ENSRNOT00000030251	18.1803	0	36.3606	Inf	Inf	0.0400894	0.801061	Up	2.88954e-07	1.35223	12:37686478:37688743:-1	LOC100910427
ENSRNOT00000030348	476.923	878.176	75.6693	0.0861665	-3.53673	0.000277329	0.0347227	Down	4.88594	0.420169	20:28179140:28263037:-1	Edar
ENSRNOT00000030613	34.0891	68.1782	0	0	#NAME?	0.00611362	0.291802	Down	1.87147	3.267e-22	18:69841053:69849389:1	Mro
ENSRNOT00000030913	35.8692	0	71.7385	Inf	Inf	0.00532043	0.264437	Up	1.69346e-13	1.67466	5:74766636:74786892:1	Palm2
ENSRNOT00000030971	270.966	472.16	69.773	0.147774	-2.75853	0.00802987	0.340904	Down	0.523477	0.0776046	13:67799791:68360664:-1	Hmcn1
ENSRNOT00000031418	73.352	8.14068	138.563	17.0211	4.08925	0.0114664	0.417502	Up	0.0963319	1.69264	3:59408546:59410211:1	AABR07052523.1
ENSRNOT00000031555	901.867	357.172	1446.56	4.05004	2.01794	0.0183071	0.545672	Up	8.2359	33.4488	12:23839399:23841049:-1	Hspb1
ENSRNOT00000031653	22.1112	0	44.2223	Inf	Inf	0.025382	0.64384	Up	0	0.780947	12:2213705:2217002:1	Mcemp1
ENSRNOT00000031768	49.1359	0	98.2719	Inf	Inf	0.00136535	0.10559	Up	2.46285e-07	3.77963	4:116933341:116936066:1	RGD1560795
ENSRNOT00000031866	60.4372	0	120.874	Inf	Inf	0.000451604	0.0461395	Up	1.18359e-09	1.30288	9:65885246:65917132:-1	Tmem237
ENSRNOT00000031896	17.1976	0	34.3952	Inf	Inf	0.0448839	0.841783	Up	0	0.648709	12:17614632:17712373:1	Prkar1b
ENSRNOT00000032158	697.078	1109.17	284.988	0.256939	-1.9605	0.0240823	0.623229	Down	3.68702	0.949646	4:147854309:147893992:-1	Plxnd1
ENSRNOT00000032249	63.9813	6.10551	121.857	19.9585	4.31893	0.0123238	0.435354	Up	0.113076	2.29078	12:38160464:38161546:1	Hcar2
ENSRNOT00000032430	30.0188	60.0375	0	0	#NAME?	0.00968902	0.374809	Down	0.158345	0	9:73529612:73683000:1	LOC689991
ENSRNOT00000032536	4148.44	6991.83	1305.05	0.186654	-2.42156	0.00908562	0.361668	Down	281.559	52.6381	15:28103703:28104206:-1	Ang2
ENSRNOT00000033450	6518.78	2748.5	10289.1	3.74352	1.9044	0.0490048	0.870461	Up	36.3867	136.392	7:140716113:140723714:1	Tuba1c
ENSRNOT00000033806	1936.62	928.038	2945.21	3.17359	1.66611	0.0499898	0.876169	Up	5.27432	16.7517	14:20480128:20816588:-1	Slc4a4
ENSRNOT00000033916	22.6025	0	45.2051	Inf	Inf	0.0239548	0.623229	Up	2.93671e-09	0.429335	16:24582002:24612698:-1	Naf1
ENSRNOT00000033917	461.96	205.552	718.367	3.49482	1.80522	0.0471671	0.858901	Up	1.57764	5.53003	2:188392858:188412329:-1	Fdps
ENSRNOT00000034448	1211.76	1868.29	555.236	0.29719	-1.75054	0.0377022	0.785006	Down	6.94475	2.06494	16:50049828:50107856:1	Fam149a
ENSRNOT00000034642	38.6682	77.3365	0	0	#NAME?	0.0037577	0.212019	Down	1.13679	9.10959e-11	14:38106712:38128024:-1	Nipal1
ENSRNOT00000034712	474.103	53.932	894.274	16.5815	4.0515	5.07914e-05	0.0105974	Up	5.53927	91.7336	6:26130488:26138414:-1	Mrpl33
ENSRNOT00000034843	6874.51	12814.5	934.565	0.0729306	-3.77733	0.00032837	0.0391503	Down	101.086	7.38469	1:163317282:163328591:-1	Tsku
ENSRNOT00000035013	2688.35	896.493	4480.21	4.99749	2.3212	0.00887144	0.360436	Up	5.65637	28.2996	1:252102219:252116971:-1	RGD1565682
ENSRNOT00000035158	457.476	746.908	168.045	0.224988	-2.15208	0.0195332	0.568216	Down	6.02967	1.35441	3:44806106:44846464:1	Upp2
ENSRNOT00000035240	1364.01	343.944	2384.08	6.93158	2.79319	0.00143186	0.108243	Up	12.1759	84.5572	2:193892589:193901236:1	S100a10
ENSRNOT00000035411	428.34	795.752	60.9286	0.0765673	-3.70713	0.000203066	0.0288469	Down	14.7862	1.13536	2:181900499:181905300:-1	Lrat
ENSRNOT00000035448	105.66	1.01759	210.302	206.668	7.69117	4.03157e-05	0.0090733	Up	0.00558219	1.04635	17:21634551:21677477:-1	Gcnt2
ENSRNOT00000035730	318.322	540.338	96.3064	0.178234	-2.48816	0.0124089	0.437218	Down	3.68793	0.661815	10:70298519:70309224:1	Slfn5
ENSRNOT00000036051	434.086	729.609	138.563	0.189915	-2.39658	0.0106099	0.400973	Down	12.4257	2.3693	8:48422036:48430797:1	Usp2
ENSRNOT00000036195	470.529	160.778	780.279	4.85313	2.27892	0.0134716	0.458127	Up	2.10705	10.2625	17:21580087:21591203:-1	Pak1ip1
ENSRNOT00000036217	33.4124	0	66.8249	Inf	Inf	0.00693344	0.315357	Up	0.000750736	1.1021	3:150154677:150156839:-1	LOC103691939
ENSRNOT00000036247	66.3335	0	132.667	Inf	Inf	0.000259634	0.0329144	Up	0.00179832	2.39309	4:117800628:117814658:-1	Dusp11
ENSRNOT00000036343	529.763	90.5651	968.961	10.6991	3.41941	0.000334206	0.0396104	Up	0.264108	2.82355	1:146069771:146226462:-1	Cemip
ENSRNOT00000036473	102.604	23.4045	181.803	7.76788	2.95752	0.0290963	0.697065	Up	0.137365	1.05586	7:15360700:15364203:-1	RGD1310212
ENSRNOT00000036481	288.968	31.5451	546.392	17.3209	4.11445	0.000181338	0.0267712	Up	0.659197	11.5936	10:43502931:43512287:-1	Faxdc2
ENSRNOT00000036518	1441.31	2245.81	636.802	0.283551	-1.81832	0.0315219	0.722406	Down	25.5308	7.25525	20:13817795:13825475:1	Gstt3
ENSRNOT00000036718	144.244	44.7737	243.714	5.44324	2.44447	0.0411404	0.815075	Up	0.658138	3.56503	1:175445088:175447259:1	Adm
ENSRNOT00000036813	235.581	385.665	85.4965	0.221686	-2.17341	0.0380675	0.786075	Down	3.88907	0.862236	9:27475273:27511176:-1	LOC501110
ENSRNOT00000036947	157.688	26.4572	288.919	10.9202	3.44893	0.00490334	0.254945	Up	0.104157	1.13982	13:70566643:70626252:-1	Lamc2
ENSRNOT00000036993	1497.98	2743.41	252.559	0.0920601	-3.44128	0.000138018	0.022116	Down	30.0282	2.766	2:243656579:243687857:1	Adh6
ENSRNOT00000037181	635.773	1029.8	241.749	0.234754	-2.09078	0.0176355	0.534764	Down	11.1346	2.61532	2:248219428:248239899:1	LOC685067
ENSRNOT00000037276	417.397	730.626	104.168	0.142574	-2.81022	0.00343114	0.198057	Down	2.81869	0.403755	8:97537968:97575636:1	Adamts7
ENSRNOT00000037296	176.398	0	352.796	Inf	Inf	1.17491e-07	7.35421e-05	Up	0.000229068	10.0942	12:31335425:31355445:1	Stx2
ENSRNOT00000037766	364.439	77.3365	651.542	8.42478	3.07464	0.0020131	0.139043	Up	0.820989	6.93165	19:26237514:26243223:-1	Zfp791
ENSRNOT00000038032	6359.1	2691.51	10026.7	3.72529	1.89735	0.0489635	0.870461	Up	19.0069	70.8966	7:135838648:135850542:-1	Twf1
ENSRNOT00000038222	86.2145	13.2286	159.2	12.0346	3.58911	0.0155653	0.498636	Up	0.15114	1.8355	9:19935768:19978013:-1	Pla2g7
ENSRNOT00000038376	428.123	697.046	159.2	0.228393	-2.13041	0.0220509	0.59606	Down	5.54397	1.27193	10:70227163:70241254:-1	Rad51d
ENSRNOT00000038426	305.686	548.478	62.894	0.11467	-3.12444	0.00246388	0.16023	Down	5.681	0.657694	12:41200718:41211909:1	Oas1a
ENSRNOT00000038480	14289.9	4855.92	23723.8	4.88555	2.28852	0.0389325	0.795656	Up	57.1676	279.641	7:143596511:143603803:-1	Krt8
ENSRNOT00000038610	219.962	76.3189	363.606	4.7643	2.25226	0.0349844	0.754128	Up	1.13703	5.42634	9:42831742:42839837:-1	Neurl3
ENSRNOT00000038677	1440.7	432.474	2448.93	5.66262	2.50147	0.00389021	0.218266	Up	6.38613	36.17	8:75687100:75723594:1	Anxa2
ENSRNOT00000038955	146.696	245.238	48.1532	0.196353	-2.34848	0.0477233	0.86117	Down	4.02712	0.797447	10:71464677:71491743:-1	LOC102552988
ENSRNOT00000039221	185.751	1.01759	370.485	364.082	8.50812	3.60926e-07	0.000195302	Up	0.0132054	3.62168	13:79378733:79388498:1	Tnfsf18
ENSRNOT00000039237	307.692	34.5979	580.787	16.7868	4.06925	0.000169357	0.0256987	Up	0.211296	3.5873	5:9355507:9381214:-1	RGD1561849
ENSRNOT00000039296	184.71	54.9496	314.47	5.72288	2.51674	0.0254277	0.643891	Up	0.22315	1.28832	2:113652348:113849038:1	Pld1
ENSRNOT00000039702	72.317	5.08793	139.546	27.4269	4.77752	0.00499569	0.255619	Up	0.0737454	2.05959	18:68408890:68472320:1	Ccdc68
ENSRNOT00000039876	348.289	597.323	99.2546	0.166166	-2.5893	0.00838308	0.347646	Down	3.65727	0.605832	11:37891156:37914983:-1	Mx1
ENSRNOT00000040060	87.7583	17.2989	158.218	9.14609	3.19315	0.0269481	0.664741	Up	0.209504	1.93042	1:80517411:80544825:-1	Relb
ENSRNOT00000040204	77.6696	2.03517	153.304	75.3274	6.2351	0.000761407	0.06839	Up	0.0991045	6.66603	9:15637428:15646381:-1	Mrps10
ENSRNOT00000040356	544.491	204.535	884.447	4.32419	2.11243	0.0186648	0.553042	Up	1.04571	4.53287	12:25411494:25487969:1	Gtf2i
ENSRNOT00000040386	21.8781	43.7562	0	0	#NAME?	0.0250678	0.641263	Down	2.41726	4.957e-05	3:16413080:16413632:1	LOC100912707
ENSRNOT00000040481	484.498	1.01759	967.978	951.25	9.89368	1.35762e-11	1.68007e-08	Up	0.0464275	54.6537	5:161889342:161889701:1	LOC100359951
ENSRNOT00000040541	3125.45	5559.07	691.834	0.124451	-3.00635	0.0011292	0.093524	Down	47.9949	5.98008	7:130342483:130347587:-1	Tymp
ENSRNOT00000040637	1157.17	1836.74	477.601	0.260026	-1.94327	0.0218778	0.593534	Down	11.4702	2.98762	X:74577131:74706214:-1	Slc16a2
ENSRNOT00000040702	44.2301	86.4947	1.96544	0.0227232	-5.45969	0.0113623	0.416065	Down	1.13878	0.0273497	6:138114266:138632203:-1	Ighm
ENSRNOT00000040708	143.526	31.5451	255.507	8.09972	3.01787	0.0141678	0.470616	Up	0.415805	3.35044	2:182027115:182038178:-1	Fgb
ENSRNOT00000040740	62.4026	0	124.805	Inf	Inf	0.000374811	0.0426173	Up	2.98067e-05	1.57623	1:261415200:261434720:1	Zfyve27
ENSRNOT00000040847	1380.02	102.776	2657.27	25.855	4.69237	9.74387e-07	0.000424282	Up	0.719264	18.6948	2:56110777:56151531:-1	Osmr
ENSRNOT00000040879	237.275	455.878	18.6717	0.0409576	-4.60973	9.40407e-05	0.017124	Down	3.22734	0.129574	9:4817854:4834255:1	LOC100910526
ENSRNOT00000041034	4009.44	7109.87	909.015	0.127853	-2.96745	0.00169202	0.12235	Down	65.0909	8.32999	7:14891001:14907305:1	Cyp4f4
ENSRNOT00000041106	3788.76	6130.95	1446.56	0.235944	-2.08348	0.0217265	0.592308	Down	36.3927	8.5973	7:11908107:11919156:1	Mknk2
ENSRNOT00000041138	19.3341	38.6682	0	0	#NAME?	0.0338436	0.739626	Down	0.206989	2.03489e-08	X:72379037:72515144:-1	Phka1
ENSRNOT00000041374	1707.93	800.84	2615.01	3.26534	1.70723	0.0437455	0.835293	Up	14.1859	46.3645	5:98469047:98515125:1	Lurap1l
ENSRNOT00000041495	32667.7	61787.8	3547.61	0.0574161	-4.1224	0.00299834	0.185839	Down	939.379	54.0052	15:28018040:28035389:1	Rnase4
ENSRNOT00000041499	661.108	1074.57	247.645	0.23046	-2.11741	0.0159167	0.501466	Down	3.66271	0.844948	4:173732248:174102496:1	Pik3c2g
ENSRNOT00000041838	29.0251	2.03517	56.015	27.5235	4.78259	0.0475158	0.859401	Up	0.0428313	1.20024	11:33845463:33847793:1	Cbr1
ENSRNOT00000041859	155.761	0	311.522	Inf	Inf	3.70517e-07	0.000195302	Up	0.000232007	1.75213	8:99977334:100059736:1	Plod2
ENSRNOT00000041908	1680.4	3180.97	179.838	0.0565354	-4.1447	9.55086e-06	0.00298912	Down	28.0785	1.58761	13:80712882:80745347:-1	Fmo1
ENSRNOT00000041925	12354.8	20424	4285.64	0.209834	-2.25268	0.0372976	0.782347	Down	335.928	70.5836	17:69695550:69711689:-1	Akr1c12
ENSRNOT00000042055	4241.92	7945.31	538.53	0.0677796	-3.883	8.89781e-05	0.0165021	Down	79.5973	5.40093	15:28305821:28314459:-1	Ndrg2
ENSRNOT00000042115	5431.26	8619.96	2242.56	0.260159	-1.94253	0.0395771	0.801061	Down	30.2947	7.89006	1:101959540:102013243:-1	Abcc6
ENSRNOT00000042643	5856.9	1858.11	9855.69	5.30414	2.40712	0.0130279	0.448366	Up	99.232	527.043	10:71047310:71053191:1	Wfdc21
ENSRNOT00000042777	39.3087	0	78.6175	Inf	Inf	0.00371976	0.211332	Up	1.44998e-06	2.75511	11:67451549:67529051:1	Stfa2l3
ENSRNOT00000042872	44.6691	83.442	5.89631	0.0706636	-3.82289	0.0451288	0.842144	Down	0.933171	0.0637824	4:162181158:162230859:-1	LOC689757
ENSRNOT00000043148	33.4124	0	66.8249	Inf	Inf	0.00693344	0.315357	Up	0.00682708	1.01598	10:71363688:71382058:-1	Dusp14
ENSRNOT00000043172	12272.8	21716.3	2829.25	0.130282	-2.94029	0.0080638	0.340904	Down	102.573	13.3816	10:88392248:88442845:-1	Acly
ENSRNOT00000043338	42.2124	83.442	0.982719	0.0117773	-6.40785	0.00721363	0.321878	Down	0.897174	0.0127984	X:118444474:118513061:-1	Il13ra2
ENSRNOT00000043517	46.2052	1.01759	91.3928	89.8135	6.48886	0.00526269	0.262872	Up	0.0415091	4.40784	1:248402980:248403399:1	LOC100361898
ENSRNOT00000043533	3812.28	6041.4	1583.16	0.262052	-1.93208	0.0325382	0.731876	Down	67.9676	17.8326	3:28416954:28566928:1	Kynu
ENSRNOT00000043736	2797.49	5029.92	565.063	0.11234	-3.15405	0.000610819	0.0591048	Down	37.6412	4.23573	18:55505993:55508704:1	RGD1309362
ENSRNOT00000043870	17.6889	0	35.3779	Inf	Inf	0.0424092	0.822119	Up	3.98186e-14	0.24513	6:4258991:4520604:-1	Slc8a1
ENSRNOT00000043872	111.377	191.306	31.447	0.164381	-2.60489	0.0448521	0.841783	Down	0.814377	0.132579	X:68771100:68785046:1	Stard8
ENSRNOT00000043949	44.7137	0	89.4274	Inf	Inf	0.00213638	0.145057	Up	0	1.2707	5:120876966:120880098:-1	RGD1561212
ENSRNOT00000044893	266.739	454.861	78.6175	0.172839	-2.5325	0.0143219	0.474662	Down	5.41329	0.943169	7:117653850:117661613:1	Adck5
ENSRNOT00000045049	4900.47	7866.95	1933.99	0.245837	-2.02422	0.0301619	0.706511	Down	122.635	30.1918	8:128027958:128036236:1	Acaa1
ENSRNOT00000045087	56.9977	0	113.995	Inf	Inf	0.000628533	0.0599691	Up	0	0.905039	8:113957279:114010277:-1	Atp2c1
ENSRNOT00000045223	43.1602	81.4068	4.91359	0.0603585	-4.0503	0.038911	0.795656	Down	0.304795	0.0198118	12:37923528:37958363:1	Abcb9
ENSRNOT00000045256	346.678	101.759	591.597	5.81373	2.53946	0.00965968	0.374809	Up	1.92686	11.2599	X:15679254:15682652:1	Plp2
ENSRNOT00000045400	289.373	26.4572	552.288	20.8748	4.38369	8.47432e-05	0.0161422	Up	0.0339475	0.698546	5:141040752:141229781:-1	Macf1
ENSRNOT00000045438	504.585	829.332	179.838	0.216846	-2.20526	0.0154039	0.497131	Down	9.9398	2.15281	2:93669765:93671457:1	Slc10a5
ENSRNOT00000045584	16.2814	32.5627	0	0	#NAME?	0.048306	0.866221	Down	1.90842	1.47056e-13	2:223029559:223045185:1	AABR07013111.1
ENSRNOT00000045596	1413.07	2404.55	421.586	0.175328	-2.51187	0.00374386	0.211835	Down	28.1882	4.94822	10:36589181:36599618:1	Zfp354a
ENSRNOT00000045874	117.447	201.482	33.4124	0.165833	-2.59219	0.042378	0.822119	Down	4.07457	0.677083	6:138092131:138093643:-1	Igh-6
ENSRNOT00000045902	281.455	51.8968	511.014	9.84672	3.29964	0.00183853	0.129213	Up	0.518809	5.13298	10:97735567:97756521:-1	Slc16a6
ENSRNOT00000045974	491.459	206.57	776.348	3.75828	1.91007	0.0346764	0.75153	Up	2.44221	9.19606	19:24846938:24854884:1	Ddx39a
ENSRNOT00000045984	694.991	327.662	1062.32	3.24211	1.69693	0.0490375	0.870461	Up	2.48908	8.08589	17:88095830:88102262:1	Thnsl1
ENSRNOT00000046201	5308.88	587.147	10030.6	17.0837	4.09454	6.8963e-05	0.0136765	Up	58.3801	999.186	MT:7758:7961:1	Mt-atp8
ENSRNOT00000046539	231.616	68.1782	395.053	5.79442	2.53466	0.0175903	0.534649	Up	0.970251	5.65981	1:7816838:8038665:-1	Aig1
ENSRNOT00000046598	8356.55	14082.4	2630.74	0.186811	-2.42035	0.0180841	0.542251	Down	78.9098	14.7624	4:175969549:176026163:-1	Slco1a4
ENSRNOT00000046772	259.985	433.491	86.4792	0.199495	-2.32558	0.0241105	0.623229	Down	27.9617	5.57441	2:23260651:23260965:-1	LOC103691423
ENSRNOT00000046885	16.7902	33.5803	0	0	#NAME?	0.0454497	0.842144	Down	1.95779	5.49008e-88	6:142932678:142933110:-1	AABR07065823.1
ENSRNOT00000047053	2167.2	3316.31	1018.1	0.306997	-1.7037	0.0465679	0.85261	Down	15.3757	4.7277	10:46570996:46593009:-1	Srebf1
ENSRNOT00000047126	1704.62	63.0903	3346.16	53.0376	5.72894	1.60664e-08	1.28724e-05	Up	0.330536	17.4858	4:22225461:22307453:-1	Abcb4
ENSRNOT00000047324	1288.3	83.442	2493.16	29.8789	4.90106	4.13969e-07	0.000202975	Up	1.1444	34.2615	6:127647184:127653124:-1	Serpina11
ENSRNOT00000047370	560.81	985.022	136.598	0.138675	-2.85022	0.0019787	0.13714	Down	4.97146	0.692468	20:4576534:4592980:1	Ehmt2
ENSRNOT00000047540	641.667	1201.77	81.5657	0.0678714	-3.88105	4.59078e-05	0.00978226	Down	16.2589	1.10934	1:83103925:83119190:1	Cyp2b2
ENSRNOT00000047615	1933.42	3609.37	257.472	0.0713343	-3.80926	3.9171e-05	0.00891585	Down	27.3784	1.9571	9:4866705:4879755:-1	Sult1c2a
ENSRNOT00000047634	1782.88	443.667	3122.1	7.03703	2.81497	0.00143208	0.108243	Up	2.8223	19.8672	12:17252093:17263477:1	Zfand2a
ENSRNOT00000047645	45.2574	3.05276	87.462	28.6502	4.84047	0.0177682	0.536799	Up	0.270592	9.29342	1:282498488:282498880:-1	AABR07007130.2
ENSRNOT00000047663	153.795	0	307.591	Inf	Inf	4.15476e-07	0.000202975	Up	1.14013e-18	16.6872	20:3677474:3677847:1	Mt1m
ENSRNOT00000047717	3191.74	1455.15	4928.33	3.38683	1.75994	0.0462644	0.850942	Up	18.021	61.1031	8:117347029:117351610:1	Impdh2
ENSRNOT00000047734	421.232	180.113	662.352	3.67744	1.8787	0.0422663	0.822119	Up	1.66631	6.15008	10:13586648:13591953:-1	LOC100158225
ENSRNOT00000047737	60.5463	121.093	0	0	#NAME?	0.00041515	0.0449484	Down	0.352932	1.88133e-05	16:6129089:6405117:-1	Cacna1d
ENSRNOT00000047750	110.73	10.1759	211.285	20.7633	4.37597	0.00225831	0.150279	Up	0.160554	3.44647	16:25773602:25774845:1	RGD1560797
ENSRNOT00000047831	1295.39	2046.36	544.426	0.266046	-1.91025	0.0240945	0.623229	Down	12.2574	3.26653	1:171820423:171966179:1	Ppfibp2
ENSRNOT00000047840	114.978	0	229.956	Inf	Inf	5.06022e-06	0.00168927	Up	0.000463073	2.75192	14:11256268:11274578:1	Hnrnpd
ENSRNOT00000048027	107.989	194.359	21.6198	0.111237	-3.1683	0.0186334	0.553039	Down	0.905063	0.100211	9:65177511:65265149:1	Aox2
ENSRNOT00000048263	17.6889	0	35.3779	Inf	Inf	0.0424092	0.822119	Up	0.00139241	1.99276	4:102123869:102124609:-1	AABR07060979.1
ENSRNOT00000048300	44.2223	0	88.4447	Inf	Inf	0.00224637	0.149983	Up	0	0.148623	3:53563194:53658132:1	Xirp2
ENSRNOT00000048349	423.894	77.3365	770.451	9.96233	3.31648	0.000721915	0.066348	Up	0.540067	5.3799	10:86582612:86595102:1	Gsdma
ENSRNOT00000048543	1768.44	3271.54	265.334	0.0811038	-3.62409	7.45892e-05	0.0145051	Down	16.5192	1.34361	10:64865805:64915148:-1	Sez6
ENSRNOT00000048858	61.5639	123.128	0	0	#NAME?	0.000376598	0.0426173	Down	2.27768	0.00263694	20:154658:157665:-1	RT1-CE10
ENSRNOT00000049437	1093.44	1672.91	513.962	0.307226	-1.70263	0.0430679	0.826293	Down	21.5324	6.62901	20:26516836:26589209:-1	Ctnna3
ENSRNOT00000049461	26.5508	1.01759	52.0841	51.184	5.67762	0.0358179	0.76318	Up	0.00849721	0.416646	2:185850232:185852759:-1	Mab21l2
ENSRNOT00000049695	19.6544	0	39.3087	Inf	Inf	0.0338611	0.739626	Up	2.38451e-15	1.50546	3:94832876:94833406:-1	RGD1560017
ENSRNOT00000049873	189.138	313.416	64.8594	0.206943	-2.27269	0.0402476	0.802947	Down	4.1689	0.859062	13:89586336:89591277:1	Nr1i3
ENSRNOT00000050038	27.5161	0	55.0322	Inf	Inf	0.0135592	0.459436	Up	2.48247e-05	0.533115	14:17531398:17554067:1	Cdkl2
ENSRNOT00000050063	1134.36	1939.52	329.211	0.169738	-2.55861	0.00317403	0.189061	Down	24.6965	4.19428	18:55576239:55584957:1	MGC108823
ENSRNOT00000050236	989.246	467.072	1511.42	3.23595	1.69419	0.0445399	0.841635	Up	4.67637	15.1483	5:2042991:2059351:1	Tceb1
ENSRNOT00000050543	51.6102	1.01759	102.203	100.437	6.65014	0.00319482	0.189061	Up	0.0097806	0.721399	8:128659884:128665988:-1	Csrnp1
ENSRNOT00000050597	983.298	464.019	1502.58	3.23818	1.69518	0.0444622	0.840961	Up	2.81592	9.12814	5:120568242:120652220:1	Leprot
ENSRNOT00000050834	247.287	65.1255	429.448	6.59417	2.72119	0.0102832	0.390099	Up	0.251878	1.66276	4:161540130:161587222:-1	Tead4
ENSRNOT00000051139	335.478	595.287	75.6693	0.127114	-2.97581	0.00310052	0.187624	Down	4.55454	0.578188	7:94480396:94563001:-1	Enpp2
ENSRNOT00000051362	17.2989	34.5979	0	0	#NAME?	0.0428102	0.823716	Down	0.170579	0.000748203	18:1276391:1389929:-1	Rock1
ENSRNOT00000051449	484.498	1.01759	967.978	951.25	9.89368	1.35762e-11	1.68007e-08	Up	0.0464275	54.6537	9:1012091:1012450:-1	LOC100362149
ENSRNOT00000051678	84.2678	157.726	10.8099	0.0685361	-3.86699	0.010835	0.403393	Down	3.32447	0.226981	20:10889573:10912769:-1	RGD1566085
ENSRNOT00000051720	11754.6	20696.7	2812.54	0.135893	-2.87945	0.00882792	0.359397	Down	96.9441	13.1891	16:60415229:60427474:-1	Ppp1r3b
ENSRNOT00000051749	1700.46	680.764	2720.17	3.99575	1.99847	0.0193328	0.564158	Up	19.1626	76.665	1:222229835:222231944:1	Ppp1r14b
ENSRNOT00000052075	1785.93	2829.9	741.953	0.262183	-1.93135	0.0237259	0.62093	Down	32.3256	8.48343	7:141973553:141981432:1	Mettl7a
ENSRNOT00000052120	1356.69	2096.23	617.147	0.294409	-1.76411	0.0364575	0.771113	Down	23.6328	6.96245	11:84615760:84633504:-1	Klhl24
ENSRNOT00000054686	240.181	51.8968	428.465	8.2561	3.04546	0.00493853	0.254945	Up	0.255678	2.11736	1:274310153:274352854:1	Smc3
ENSRNOT00000054848	58.4892	1.01759	115.961	113.957	6.83234	0.00171647	0.122844	Up	0.0162477	1.94667	1:219743747:219745654:-1	LOC689065
ENSRNOT00000054917	178.066	298.152	57.9804	0.194466	-2.36241	0.0363472	0.769593	Down	3.21908	0.623448	10:110557729:110585376:-1	Rab40b
ENSRNOT00000054947	1190.66	2070.79	310.539	0.149962	-2.73733	0.00172337	0.122844	Down	20.5926	3.09316	10:109832981:109840047:-1	Notum
ENSRNOT00000054962	1053.72	1821.48	285.971	0.157	-2.67117	0.00219045	0.148225	Down	19.7375	3.10784	10:109707962:109716128:1	Gcgr
ENSRNOT00000055038	20.6371	0	41.2742	Inf	Inf	0.0301934	0.706511	Up	0	0.648504	3:176479335:176489594:1	Arfgap1
ENSRNOT00000055254	311.498	55.9672	567.029	10.1314	3.34077	0.00130716	0.10308	Up	0.778985	7.83664	3:151285249:151289595:1	Procr
ENSRNOT00000055361	268.621	105.829	431.414	4.07652	2.02734	0.0453259	0.842144	Up	1.69895	6.91383	5:172648950:172655576:1	Faap20
ENSRNOT00000055473	19.8429	39.6858	0	0	#NAME?	0.0318959	0.722708	Down	0.470014	5.94446e-05	4:181103774:181158200:1	Arntl2
ENSRNOT00000055506	403.512	149.585	657.439	4.39508	2.13589	0.023086	0.613279	Up	2.19982	9.66224	5:168009393:168035810:1	Tnfrsf9
ENSRNOT00000055542	96.7436	168.919	24.568	0.145442	-2.78148	0.042077	0.822119	Down	1.22049	0.178104	4:178066787:178441547:-1	Sox5
ENSRNOT00000055664	223.858	389.735	57.9804	0.148769	-2.74886	0.0113376	0.41592	Down	8.89789	1.32604	10:77840568:77918191:-1	Hlf
ENSRNOT00000055805	54.3711	104.811	3.93087	0.0375043	-4.7368	0.0119454	0.426777	Down	2.2026	0.0743513	7:130347945:130350570:-1	Odf3b
ENSRNOT00000055810	74.2837	148.567	0	0	#NAME?	0.000116291	0.0199086	Down	2.72883	1.80419e-11	3:122942386:122946289:-1	Pced1a
ENSRNOT00000055839	23.387	45.7913	0.982719	0.0214608	-5.54215	0.0477223	0.86117	Down	0.147742	0.00387674	5:159540453:159583049:-1	Crocc
ENSRNOT00000056198	37.1419	74.2837	0	0	#NAME?	0.00440779	0.238617	Down	0.649047	7.22077e-07	4:152892388:152925928:1	Kdm5a
ENSRNOT00000056251	147.408	0	294.816	Inf	Inf	6.0734e-07	0.000289643	Up	1.28941e-05	4.07735	9:121831716:121877795:1	Yes1
ENSRNOT00000056727	221.53	24.422	418.638	17.1418	4.09945	0.000439124	0.0458107	Up	0.325064	5.48397	8:99625602:99645881:1	Plscr2
ENSRNOT00000056790	450.865	705.187	196.544	0.278712	-1.84315	0.0437062	0.835293	Down	2.92741	0.818802	12:51908448:51934702:1	Ulk1
ENSRNOT00000056815	2103.41	3206.41	1000.41	0.312002	-1.68037	0.0491074	0.870461	Down	62.6416	19.5646	5:137189473:137192240:1	Hyi
ENSRNOT00000057034	107.395	16.2814	198.509	12.1924	3.60791	0.00905458	0.361668	Up	0.257147	3.15492	1:87000093:87006753:1	Hnrnpl
ENSRNOT00000057382	32.0539	64.1079	0	0	#NAME?	0.00767302	0.33411	Down	0.594503	2.17285e-06	4:24612205:24640686:1	LOC100912481
ENSRNOT00000057472	25.0593	0	50.1187	Inf	Inf	0.0179816	0.539988	Up	1.17369e-06	0.5123	9:81655696:81666701:1	Slc11a1
ENSRNOT00000057798	239.704	81.4068	398.001	4.88904	2.28955	0.0290335	0.697065	Up	0.59278	2.90241	10:48240330:48444334:1	Specc1
ENSRNOT00000057855	120.432	31.5451	209.319	6.63554	2.73021	0.0324215	0.730487	Up	0.544941	3.57044	17:78915604:78919143:1	Rpp38
ENSRNOT00000057898	34238.5	4594.4	63882.6	13.9045	3.79748	0.00602737	0.289516	Up	239.738	3337.26	17:78793336:78793724:1	Mt1
ENSRNOT00000058148	126.102	18.3165	233.887	12.7692	3.67459	0.00541381	0.26709	Up	0.0545848	0.685139	15:60722160:60752106:-1	Akap11
ENSRNOT00000058334	36.5633	69.1958	3.93087	0.056808	-4.13776	0.0484513	0.867841	Down	0.38004	0.0232097	1:75428027:75620911:1	Pla2g4cl1
ENSRNOT00000058367	913.239	1594.56	231.922	0.145446	-2.78145	0.00157908	0.115776	Down	25.9745	3.78493	17:69441223:69460321:-1	Akr1c1
ENSRNOT00000058413	574.391	1003.34	145.442	0.144958	-2.78629	0.00235455	0.154123	Down	18.4039	2.67998	17:69468427:69497132:1	RGD1564865
ENSRNOT00000058589	18.8253	37.6507	0	0	#NAME?	0.0358919	0.76318	Down	0.585097	4.59678e-19	7:54021832:54026789:1	Osbpl8
ENSRNOT00000058834	56.0847	4.07034	108.099	26.5577	4.73106	0.0112191	0.412328	Up	0.0200202	0.481744	X:36930186:37003642:-1	Adgrg2
ENSRNOT00000058891	150.257	252.361	48.1532	0.190811	-2.38979	0.0429374	0.824629	Down	1.76286	0.339285	19:43932946:43955747:-1	Bcar1
ENSRNOT00000058893	29.0251	2.03517	56.015	27.5235	4.78259	0.0475158	0.859401	Up	0.0189919	0.463554	5:90419020:90488896:1	Rasef
ENSRNOT00000059159	19.6544	0	39.3087	Inf	Inf	0.0338611	0.739626	Up	0	2.47652	9:53440272:53440595:1	LOC685203
ENSRNOT00000059162	144.983	30.5276	259.438	8.49848	3.0872	0.0121495	0.431479	Up	0.251846	2.14901	18:59986360:60002569:-1	Nars
ENSRNOT00000059192	1045.7	1668.84	422.569	0.253211	-1.98159	0.0197058	0.568216	Down	13.5119	3.42517	8:54965583:54990604:-1	Bco2
ENSRNOT00000059194	41.2742	0	82.5484	Inf	Inf	0.00304011	0.185839	Up	3.51862e-10	1.05258	20:6225800:6251634:-1	Stk38
ENSRNOT00000059320	1187.41	1966.99	407.828	0.207336	-2.26996	0.00811037	0.341283	Down	56.479	11.7268	5:77405142:77903101:-1	LOC100912565
ENSRNOT00000059326	23.9133	47.8265	0	0	#NAME?	0.0197011	0.568216	Down	1.49278	0	2:93712992:93766654:1	Fabp12
ENSRNOT00000059430	212.407	8.14068	416.673	51.184	5.67762	1.22026e-05	0.0037033	Up	0.044138	2.23883	3:37955069:38090526:-1	Cacnb4
ENSRNOT00000059496	330.463	101.759	559.167	5.49504	2.45813	0.0127576	0.44674	Up	0.329443	1.8174	10:31278746:31419235:-1	Cyfip2
ENSRNOT00000059532	43.7484	1.01759	86.4792	84.9848	6.40913	0.00662123	0.310056	Up	0.0149186	1.13036	7:27620458:27786999:1	RGD1560034
ENSRNOT00000059538	1839.2	3071.07	607.32	0.197755	-2.33821	0.00702499	0.316204	Down	8.19689	1.62249	7:27369853:27552078:-1	Stab2
ENSRNOT00000059592	17.8077	35.6155	0	0	#NAME?	0.0403547	0.804283	Down	0.440993	6.83388e-06	12:21748633:21760292:-1	LOC102550456
ENSRNOT00000059735	1685.17	2627.4	742.935	0.282764	-1.82233	0.0318733	0.722708	Down	13.0195	3.68681	11:60645661:60679249:-1	Ccdc80
ENSRNOT00000059806	152.053	41.721	262.386	6.28906	2.65284	0.0258877	0.652761	Up	0.131819	0.828437	9:42945358:42998109:1	Fer1l5
ENSRNOT00000059892	997.63	1902.88	92.3756	0.048545	-4.36453	3.87911e-06	0.00136313	Down	18.6544	0.911255	4:62797677:62840357:-1	Slc13a4
ENSRNOT00000059895	18.1803	0	36.3606	Inf	Inf	0.0400894	0.801061	Up	1.91756e-05	0.17466	10:18140356:18443934:-1	Ranbp17
ENSRNOT00000060370	60.0375	120.075	0	0	#NAME?	0.000435963	0.0458107	Down	0.968119	8.58924e-07	12:16950728:16958554:1	Ints1
ENSRNOT00000060515	541.061	893.44	188.682	0.211186	-2.24341	0.0129752	0.448366	Down	10.6029	2.23911	14:88543630:88574195:1	LOC100911576
ENSRNOT00000060530	35213.4	9098.23	61328.5	6.74071	2.7529	0.0386231	0.793458	Up	66.3999	448.15	4:50152452:50200328:-1	Aass
ENSRNOT00000060608	61.5465	122.11	0.982719	0.0080478	-6.95719	0.00121578	0.0985914	Down	1.15654	0.0111133	12:14021727:14078134:1	Mmd2
ENSRNOT00000061299	88.0211	176.042	0	0	#NAME?	3.58275e-05	0.00842581	Down	4.24343	2.68658e-14	20:3246739:3249188:1	LOC100909797
ENSRNOT00000061786	24.9308	49.8617	0	0	#NAME?	0.0174834	0.532207	Down	1.31685	0.00835014	6:108745895:108756130:1	Eif3h
ENSRNOT00000061861	1797.47	3016.12	578.821	0.191909	-2.38151	0.00607531	0.291121	Down	22.8827	4.39787	9:4152589:4168221:-1	Sult1c2a
ENSRNOT00000063787	452.128	90.5651	813.691	8.9846	3.16745	0.00101605	0.0858714	Up	2.6868	24.2785	8:129241109:129243402:1	Rpl14
ENSRNOT00000063821	55.0322	0	110.064	Inf	Inf	0.000761098	0.06839	Up	6.12428e-05	0.652667	2:18490102:18565842:-1	Vcan
ENSRNOT00000063853	7380.85	8.14068	14753.6	1812.32	10.8236	1.66933e-13	4.77666e-10	Up	0.0763473	134.027	9:95285592:95302822:1	Ugt1a8
ENSRNOT00000063862	17.2989	34.5979	0	0	#NAME?	0.0428102	0.823716	Down	1.74518	0.00314593	3:17080904:17081510:-1
ENSRNOT00000063911	212.839	62.0727	363.606	5.85774	2.55034	0.0192511	0.564158	Up	1.74184	10.2467	17:81173713:81187739:-1	Hacd1
ENSRNOT00000064013	3233.7	5453.24	1014.17	0.185975	-2.42682	0.00730691	0.324408	Down	38.6066	7.18981	3:151032952:151075856:1	Acss2
ENSRNOT00000064029	4148.44	6991.83	1305.05	0.186654	-2.42156	0.00908562	0.361668	Down	281.559	52.6381	scaffold:Rnor_6.0:KL568405.1:92228:92731:-1	Ang2
ENSRNOT00000064105	18.1803	0	36.3606	Inf	Inf	0.0400894	0.801061	Up	0.00188797	0.201192	19:12481563:12942943:-1	Large
ENSRNOT00000064160	3185.74	1162.08	5209.39	4.48281	2.1644	0.0155667	0.498636	Up	8.51199	38.1871	1:261389804:261393736:1	Marveld1
ENSRNOT00000064305	454.71	69.1958	840.224	12.1427	3.60202	0.000249929	0.0320903	Up	0.645878	7.8929	1:80820050:80835701:-1	PVR
ENSRNOT00000064345	23.5852	0	47.1705	Inf	Inf	0.021348	0.587364	Up	1.11462e-05	0.112004	3:111699087:111759714:1	Mga
ENSRNOT00000064395	54.7927	100.741	8.84447	0.0877942	-3.50973	0.0431292	0.826676	Down	0.233802	0.0201508	3:111699087:111759714:1	Mga
ENSRNOT00000064526	142.678	240.15	45.2051	0.188237	-2.40938	0.0443429	0.840292	Down	1.61189	0.305768	12:32666635:32740732:-1	Glt1d1
ENSRNOT00000064700	3739.27	5852.13	1626.4	0.277916	-1.84728	0.0400035	0.801061	Down	61.5109	17.1139	7:124023995:124041594:-1	Cyb5r3
ENSRNOT00000064744	1702.02	570.865	2833.18	4.96295	2.3112	0.00747198	0.328931	Up	9.95563	49.4546	10:18082932:18090932:-1	Npm1
ENSRNOT00000064840	74.4961	132.286	16.7062	0.126289	-2.9852	0.0479343	0.862645	Down	0.599634	0.0755022	10:59529785:59560430:1	Atp2a3
ENSRNOT00000065025	419.247	666.518	171.976	0.258021	-1.95444	0.0351849	0.755568	Down	2.60477	0.672787	20:3367150:3386106:-1	Dhx16
ENSRNOT00000065497	562.399	905.651	219.146	0.241977	-2.04706	0.0217624	0.592308	Down	16.0332	3.88002	5:156677146:156689258:-1	Pink1
ENSRNOT00000065529	632.263	1025.73	238.801	0.232811	-2.10277	0.0171085	0.52398	Down	4.42853	1.03118	6:128473570:128567198:-1	Clmn
ENSRNOT00000065633	5069.26	1944.61	8193.91	4.21366	2.07507	0.0271809	0.668015	Up	12.3444	52.0664	10:25903925:25910298:-1	Ccng1
ENSRNOT00000065839	19.3341	38.6682	0	0	#NAME?	0.0338436	0.739626	Down	1.84214	6.62903e-20	9:4875036:4876023:-1	Sult1c2a
ENSRNOT00000065909	108.869	16.2814	201.457	12.3735	3.62918	0.00845109	0.349743	Up	0.28648	3.46166	5:59063558:59068188:1	Creb3
ENSRNOT00000065978	11038.7	18287	3790.35	0.20727	-2.27042	0.0327807	0.73445	Down	87.187	18.092	17:76306585:76358058:1	Dhtkd1
ENSRNOT00000066137	18.1803	0	36.3606	Inf	Inf	0.0400894	0.801061	Up	2.99379e-28	1.68175	10:105751442:105771972:-1	Mxra7
ENSRNOT00000066346	1234.71	2032.12	437.31	0.215199	-2.21626	0.00959992	0.373372	Down	29.7222	6.40514	9:98549705:98551410:-1	Hes6
ENSRNOT00000066468	198.625	64.1079	333.142	5.19658	2.37756	0.0306441	0.711508	Up	0.526489	2.74307	4:144536729:144620731:-1	Rad18
ENSRNOT00000066597	133.955	247.273	20.6371	0.0834587	-3.58279	0.00549345	0.269691	Down	8.61464	0.725956	1:189347736:189359730:-1	RGD1559600
ENSRNOT00000066670	3976.01	7252.33	699.696	0.0964788	-3.37364	0.000447892	0.0461395	Down	27.1428	2.62066	4:149261044:149273891:1	Cxcl12
ENSRNOT00000066685	16.7902	33.5803	0	0	#NAME?	0.0454497	0.842144	Down	0.239967	3.23065e-13	3:111825162:111833526:1	Pla2g4b
ENSRNOT00000066691	1857.73	3177.92	537.547	0.169151	-2.56362	0.00340452	0.197088	Down	88.3639	14.9669	1:219309593:219312240:-1	RGD1307603
ENSRNOT00000067017	38.326	0	76.6521	Inf	Inf	0.00411635	0.225275	Up	1.25712e-05	0.410985	13:109338762:109483868:-1	Rps6kc1
ENSRNOT00000067042	2605.39	4428.53	782.244	0.176637	-2.50114	0.00499384	0.255619	Down	30.252	5.35208	2:195617021:195637630:1	Rorc
ENSRNOT00000067076	17.6889	0	35.3779	Inf	Inf	0.0424092	0.822119	Up	9.32045e-14	0.325283	5:78143554:78183122:-1	Fkbp15
ENSRNOT00000067093	374.17	157.726	590.614	3.74456	1.9048	0.0437964	0.835468	Up	3.53501	13.2579	1:220039734:220048950:-1	Rbm4
ENSRNOT00000067188	603.712	248.291	959.133	3.86294	1.9497	0.0270411	0.665533	Up	2.52576	9.77042	10:35870682:35879910:1	Hnrnph1
ENSRNOT00000067237	244.862	95.653	394.07	4.11979	2.04257	0.0482618	0.866221	Up	2.99941	12.3479	5:137243094:137243978:1	Med8
ENSRNOT00000067336	16.7902	33.5803	0	0	#NAME?	0.0454497	0.842144	Down	1.77464	0	6:141487555:141488290:-1	AABR07065792.1
ENSRNOT00000067384	1469.72	663.466	2275.98	3.43044	1.77839	0.0353013	0.75705	Up	2.07907	7.14362	1:239412884:239474931:1	Tmem2
ENSRNOT00000067391	152096	3896.33	300295	77.0712	6.26812	0.00700157	0.315909	Up	207.028	15975.1	19:11307967:11308740:-1	Mt2A
ENSRNOT00000067435	233.493	378.542	88.4447	0.233646	-2.0976	0.0451422	0.842144	Down	3.32117	0.77727	5:100439476:100647727:-1	Nfib
ENSRNOT00000067445	44.7137	0	89.4274	Inf	Inf	0.00213638	0.145057	Up	6.12709e-05	1.11058	13:47421696:47438360:-1	Pfkfb2
ENSRNOT00000067448	119.453	3.05276	235.852	77.2589	6.27163	8.62314e-05	0.0161422	Up	0.00990523	0.886393	12:1682527:1816414:-1	Insr
ENSRNOT00000067574	575.816	971.794	179.838	0.185057	-2.43396	0.00700267	0.315909	Down	5.40659	1.00449	5:159755535:159773699:1	Arhgef19
ENSRNOT00000067639	21.6198	0	43.2396	Inf	Inf	0.0268959	0.664273	Up	0.000117067	0.437001	16:6655662:6669045:-1	Prkcd
ENSRNOT00000067643	4846.4	8181.38	1511.42	0.184739	-2.43644	0.0100305	0.385626	Down	38.1729	7.05975	1:250426158:250514866:1	A1cf
ENSRNOT00000067802	112.03	0	224.06	Inf	Inf	6.24464e-06	0.00201742	Up	0	14.0394	1:87927175:87932171:-1	Eif3k
ENSRNOT00000067822	4432.64	7289.98	1575.3	0.216091	-2.21029	0.0172514	0.526746	Down	54.7789	11.8485	1:253119112:253185533:-1	Pank1
ENSRNOT00000067823	29.499	1.01759	57.9804	56.9784	5.83234	0.0263935	0.661656	Up	0.0117647	0.466053	5:25577593:25583834:-1	Pdp1
ENSRNOT00000067843	13722.6	25520	1925.15	0.0754367	-3.72859	0.00142164	0.108243	Down	285.697	21.5769	2:264266984:264293046:-1	Cth
ENSRNOT00000067875	779.44	123.128	1435.75	11.6607	3.54358	0.000117908	0.0200143	Up	1.69977	19.8892	14:6673686:6679901:-1	Spp1
ENSRNOT00000067881	40.7828	0	81.5657	Inf	Inf	0.0031973	0.189061	Up	0	0.779538	4:129196659:129430251:-1	Fam19a4
ENSRNOT00000067889	55.5236	0	111.047	Inf	Inf	0.000725422	0.066348	Up	2.87992e-08	1.03668	1:140845479:140860882:-1	Mfge8
ENSRNOT00000067977	345.172	71.231	619.113	8.69162	3.11963	0.00196567	0.13671	Up	0.291173	2.5286	5:9279970:9315114:1	Mybl1
ENSRNOT00000067997	2338.12	931.09	3745.14	4.02232	2.00803	0.0207701	0.579421	Up	29.722	119.671	14:86751157:86751792:1	LOC100360491
ENSRNOT00000068078	15109.9	2757.66	27462.1	9.95848	3.31593	0.0044344	0.239168	Up	48.0902	479.441	X:43626480:43629765:1	Sat1
ENSRNOT00000068148	585.992	217.763	954.22	4.38191	2.13156	0.0166884	0.515051	Up	1.3857	6.09464	13:67672878:67688477:-1	Prg4
ENSRNOT00000068183	78.1623	145.515	10.8099	0.0742874	-3.75074	0.0153337	0.49698	Down	0.637633	0.0489763	1:200590953:200696928:-1	Fgfr2
ENSRNOT00000068185	1069.09	452.825	1685.36	3.72188	1.89603	0.0252016	0.642224	Up	6.13012	22.8291	4:165606821:165629996:-1	Ybx3
ENSRNOT00000068633	7963.67	13320.2	2607.15	0.195729	-2.35307	0.0202542	0.573845	Down	62.6989	12.2874	9:64929694:65007884:1	Aox1
ENSRNOT00000070792	61.0506	7.1231	114.978	16.1416	4.01271	0.0197531	0.56847	Up	0.110007	1.71427	3:37545238:37564699:1	Tnfaip6
ENSRNOT00000070805	594.974	82.4244	1107.52	13.4368	3.74812	8.60722e-05	0.0161422	Up	7.4471	99.993	9:15313523:15314435:1	Tomm6
ENSRNOT00000070842	38.3783	3.05276	73.7039	24.1434	4.59356	0.0313123	0.719225	Up	0.0237946	0.501296	10:108440950:108468310:1	Card14
ENSRNOT00000070851	53.5582	0	107.116	Inf	Inf	0.000879577	0.0769342	Up	0.0497531	11.3153	18:87637608:87637985:1	LOC102550729
ENSRNOT00000070895	1435.39	2244.79	625.992	0.278864	-1.84237	0.0294532	0.69918	Down	39.7643	11.101	17:76008807:76022813:1	Echdc3
ENSRNOT00000070903	411.981	672.624	151.339	0.224998	-2.15202	0.0216552	0.592308	Down	11.2274	2.52164	20:3226360:3233694:1	RT1-T24-3
ENSRNOT00000070907	31.4819	2.03517	60.9286	29.9378	4.9039	0.0376189	0.784085	Up	0.0421906	1.36887	4:183347456:183374195:-1	Caprin2
ENSRNOT00000070912	1506.31	217.763	2794.85	12.8344	3.68194	5.5366e-05	0.0110898	Up	1.22054	15.7037	3:109862120:109873466:1	Thbs1
ENSRNOT00000070925	419.079	140.427	697.73	4.96864	2.31285	0.0139174	0.46461	Up	1.37842	6.84057	20:18058245:18060661:-1	LOC100362738
ENSRNOT00000071109	1068.07	1941.55	194.578	0.100218	-3.31879	0.000215197	0.0293224	Down	25.0902	2.51451	1:219329574:219335043:1	Cabp2
ENSRNOT00000071200	322.253	540.338	104.168	0.192783	-2.37495	0.0162501	0.506994	Down	4.92565	0.95184	9:95161157:95302822:1	Ugt1a8
ENSRNOT00000071388	866.708	1373.74	359.675	0.261822	-1.93334	0.0236637	0.620398	Down	9.29501	2.43796	13:36257112:36290531:-1	Steap3
ENSRNOT00000071405	2394.14	4115.11	673.162	0.163583	-2.61191	0.00331871	0.194368	Down	13.9541	2.28449	14:34727623:34787183:1	Kdr
ENSRNOT00000071447	93.583	185.201	1.96544	0.0106125	-6.55809	0.000213073	0.0292319	Down	5.51468	0.0475516	4:117567668:117568348:-1	Cml2
ENSRNOT00000071482	576.004	237.097	914.911	3.8588	1.94815	0.0280113	0.683395	Up	2.05091	7.9147	13:73708815:73720429:1	Tor1aip2
ENSRNOT00000071603	3156.68	5747.32	566.046	0.0984887	-3.3439	0.000363056	0.0417932	Down	66.6952	6.58213	2:195416469:195423787:-1	Selenbp1
ENSRNOT00000071612	244.22	488.441	0	0	#NAME?	3.82222e-09	3.32866e-06	Down	7.9039	9.35881e-10	18:55391388:55392641:1	RGD1309362
ENSRNOT00000071707	85.4597	169.937	0.982719	0.00578285	-7.434	0.000164319	0.0253177	Down	1.13448	0.00480795	11:82862695:82876051:1	LOC100912455
ENSRNOT00000071971	519.061	842.561	195.561	0.232103	-2.10716	0.0196817	0.568216	Down	18.5348	4.31573	1:72491780:72509431:-1	LOC684270
ENSRNOT00000071978	140.752	41.721	239.783	5.74731	2.52289	0.0369336	0.778268	Up	0.584911	3.36962	17:90033539:90071408:-1	Pdss1
ENSRNOT00000072019	99.3224	176.042	22.6025	0.128393	-2.96137	0.0304681	0.711277	Down	8.69928	1.10884	17:43616247:43616657:1	Hist1h2ail1
ENSRNOT00000072086	24.5854	1.01759	48.1532	47.3211	5.56441	0.0438817	0.835503	Up	0.0186958	0.789314	9:20217278:20219209:-1	LOC100911548
ENSRNOT00000072188	11680.9	20551.2	2810.58	0.13676	-2.87028	0.00895283	0.361543	Down	241.524	33.0724	1:248723397:248729962:1	LOC100911854
ENSRNOT00000072202	52.1015	1.01759	103.185	101.402	6.66395	0.00305449	0.185962	Up	0.157954	10.8828	3:167513759:167514438:1	AABR07054716.1
ENSRNOT00000072416	527.683	169.937	885.43	5.21035	2.38138	0.00894674	0.361543	Up	3.24791	16.9444	19:50357338:50367187:-1	Mphosph6
ENSRNOT00000072573	189.173	0	378.347	Inf	Inf	6.00533e-08	4.29596e-05	Up	2.23471e-07	30.1732	8:72743426:72745926:1	Rps27l
ENSRNOT00000072696	794.933	1228.23	361.64	0.294441	-1.76395	0.0389795	0.795656	Down	58.1035	17.1148	20:14101656:14102901:1	Gucd1
ENSRNOT00000072818	25.4396	50.8793	0	0	#NAME?	0.0164782	0.510926	Down	1.14456	0.000152342	14:5017698:5033941:-1	Zfp326
ENSRNOT00000072864	358.063	594.27	121.857	0.205054	-2.28593	0.0178797	0.539353	Down	4.44427	0.912517	5:154552195:154594785:1	Asap3
ENSRNOT00000072869	567.783	933.126	202.44	0.216948	-2.20458	0.0138959	0.46461	Down	4.3721	0.95053	5:58855773:58882096:1	Rusc2
ENSRNOT00000072930	70.7906	2.03517	139.546	68.5673	6.09945	0.00130407	0.10308	Up	0.203368	14.5151	17:3729421:3729810:-1	AABR07026893.1
ENSRNOT00000072951	42.7483	0	85.4965	Inf	Inf	0.00261281	0.167739	Up	2.63435e-06	2.17294	20:12658065:12663173:1	Col6a1
ENSRNOT00000073000	1315.57	2248.86	382.278	0.169987	-2.5565	0.00319979	0.189061	Down	32.505	5.53172	9:9988057:10001962:1	Slc25a23
ENSRNOT00000073021	21.8781	43.7562	0	0	#NAME?	0.0250678	0.641263	Down	2.41777	3.28301e-08	3:17889972:17890702:1	AABR07051611.1
ENSRNOT00000073160	501.185	171.972	830.397	4.82868	2.27163	0.0128992	0.44734	Up	7.37538	35.5871	9:16802319:16807966:-1	LOC100910336
ENSRNOT00000073254	526.276	202.499	850.052	4.1978	2.06963	0.0215777	0.591245	Up	1.9615	8.257	16:70068378:70070470:1	LOC100912029
ENSRNOT00000073304	17.2989	34.5979	0	0	#NAME?	0.0428102	0.823716	Down	1.98615	0.00258414	6:138631604:138631997:-1	AABR07065651.3
ENSRNOT00000073395	23.5852	0	47.1705	Inf	Inf	0.021348	0.587364	Up	2.96004e-11	0.579844	8:118428289:118436894:-1	LOC100911807
ENSRNOT00000073428	18.1803	0	36.3606	Inf	Inf	0.0400894	0.801061	Up	3.20633e-11	0.312977	6:111271283:111295917:-1	Vipas39
ENSRNOT00000073581	36.378	1.01759	71.7385	70.4987	6.13953	0.0132574	0.453923	Up	0.0202272	1.06285	1:53573128:53589844:-1	Unc93a
ENSRNOT00000073716	116.005	232.009	0	0	#NAME?	4.2204e-06	0.00145749	Down	2.54679	0.000426197	2:165805144:165816697:1	Rabif
ENSRNOT00000073779	34.5456	66.143	2.94816	0.0445724	-4.4877	0.0409714	0.812532	Down	4.51372	0.171654	6:140879774:140880070:-1	LOC691828
ENSRNOT00000073809	4205.1	7516.9	893.291	0.118838	-3.07294	0.00128532	0.102162	Down	60.7564	7.22667	10:106828981:106844314:1	Afmid
ENSRNOT00000073910	4307.99	1591.5	7024.47	4.41373	2.142	0.0202826	0.573845	Up	18.0336	79.7007	6:60132024:60151420:-1	Ifrd1
ENSRNOT00000073951	21381.4	5813.46	36949.2	6.3558	2.66807	0.0264894	0.662632	Up	86.1909	548.476	7:143629455:143633131:1	Krt18
ENSRNOT00000073991	1746.55	2653.86	839.242	0.316234	-1.66094	0.0496447	0.875574	Down	9.42919	2.98716	9:10603813:10645939:1	Ptprs
ENSRNOT00000074087	442.106	882.246	1.96544	0.00222776	-8.81019	1.18736e-10	1.32127e-07	Down	5.65403	0.0103313	17:77195715:77218374:1	Optn
ENSRNOT00000074109	3915.13	6222.53	1607.73	0.258372	-1.95248	0.0313472	0.719225	Down	404.772	104.727	17:43673294:43673605:1	RGD1562378
ENSRNOT00000074175	933.84	1449.04	418.638	0.288907	-1.79132	0.0345494	0.75153	Down	43.8226	12.6762	4:98457810:98523473:1	Igkv6-20
ENSRNOT00000074351	546.418	230.992	861.844	3.73106	1.89959	0.0330255	0.735818	Up	8.16746	30.4654	4:79573998:79581208:1	Npy
ENSRNOT00000074352	329.219	545.426	113.013	0.207201	-2.2709	0.0205076	0.573845	Down	4.5798	0.95267	1:73610149:73619356:-1	Lilrb3
ENSRNOT00000074362	5150.35	8943.56	1357.13	0.151744	-2.72028	0.00479019	0.250516	Down	213.548	32.457	10:109907759:109909646:-1	Dcxr
ENSRNOT00000074520	17.1976	0	34.3952	Inf	Inf	0.0448839	0.841783	Up	7.11345e-05	0.478431	1:75152883:75154325:-1	RGD1564801
ENSRNOT00000074791	1230.82	2349.6	112.03	0.0476803	-4.39046	3.24401e-06	0.00118141	Down	94.0595	4.47742	12:9446940:9455673:1	Urad
ENSRNOT00000074842	146.913	28.4924	265.334	9.31245	3.21916	0.00912926	0.361668	Up	0.519956	4.80297	17:32066213:32076181:-1	LOC100911107
ENSRNOT00000074990	4301.15	7588.13	1014.17	0.133652	-2.90345	0.0022462	0.149983	Down	119.663	16.0181	6:95387718:95502775:-1	Dhrs7l1
ENSRNOT00000075042	673.674	1062.36	284.988	0.26826	-1.8983	0.0291284	0.697065	Down	7.91737	2.12942	4:123516788:123557501:-1	Aldh1l1
ENSRNOT00000075065	314.83	537.285	92.3756	0.17193	-2.5401	0.0110386	0.408695	Down	34.9822	6.01337	17:43617247:43617558:1	Hist1h4b
ENSRNOT00000075167	63.0858	11.1934	114.978	10.2719	3.36063	0.0399593	0.801061	Up	0.234039	2.36999	1:81328183:81344708:1	Plaur
ENSRNOT00000075181	34.4475	3.05276	65.8422	21.5681	4.43083	0.0435124	0.833225	Up	0.0417225	0.891132	2:213420314:213421811:-1	LOC100911617
ENSRNOT00000075363	17.2989	34.5979	0	0	#NAME?	0.0428102	0.823716	Down	1.98615	0.00258414	6:138900522:138900915:-1	AABR07065656.3
ENSRNOT00000075464	860.405	2.03517	1718.78	844.536	9.72202	1.48742e-13	4.77666e-10	Up	0.0421191	31.4633	5:137458691:137463255:1	LOC100912375
ENSRNOT00000075474	6691.13	11374.6	2007.69	0.176507	-2.5022	0.0116519	0.419007	Down	24.3158	4.29669	5:92862267:93244202:-1	Ptprd
ENSRNOT00000075476	227.381	423.315	31.447	0.0742874	-3.75074	0.000963113	0.0824408	Down	4.31831	0.325791	8:62946732:62948720:-1	Islr
ENSRNOT00000075589	169.417	280.854	57.9804	0.206444	-2.27618	0.04569	0.843476	Down	3.82579	0.794715	7:15198967:15225309:-1	Cyp4f6
ENSRNOT00000075597	632.246	250.326	1014.17	4.05138	2.01841	0.0217251	0.592308	Up	5.1635	20.9782	1:170471274:170472566:1	Timm10b
ENSRNOT00000075799	3604.12	0	7208.24	Inf	Inf	1.86515e-17	3.73589e-13	Up	2.60239e-06	33.1471	4:154423209:154472924:1	A2m
ENSRNOT00000075800	1047.6	431.456	1663.74	3.85611	1.94715	0.021797	0.592392	Up	1.95891	7.56743	20:28815039:28819505:1	Sowahc
ENSRNOT00000075813	134.572	225.904	43.2396	0.191407	-2.38528	0.0499419	0.876169	Down	6.71845	1.28094	4:117574474:117575154:-1	LOC102556148
ENSRNOT00000075863	39.3087	0	78.6175	Inf	Inf	0.00371976	0.211332	Up	8.41831e-08	1.3602	14:81819459:81830780:1	Mxd4
ENSRNOT00000075987	42.2569	0	84.5138	Inf	Inf	0.00274823	0.175309	Up	0.00267222	2.41381	12:11232964:11240399:-1	Bud31
ENSRNOT00000076022	43.8007	4.07034	83.5311	20.5219	4.35909	0.0289943	0.697065	Up	0.018659	0.415583	10:11393103:11512402:1	Adcy9
ENSRNOT00000076085	47.7568	91.5827	3.93087	0.0429216	-4.54215	0.0200027	0.573845	Down	3.56145	0.139739	18:14756684:14936053:1	Mapre2
ENSRNOT00000076114	20.6371	0	41.2742	Inf	Inf	0.0301934	0.706511	Up	0	0.270806	11:70185757:70211701:-1	Muc13
ENSRNOT00000076159	37.6158	73.2661	1.96544	0.026826	-5.22022	0.0203829	0.573845	Down	0.303529	0.00750147	18:86116055:86247156:1	Rttn
ENSRNOT00000076349	49.1882	3.05276	95.3237	31.2255	4.96465	0.0128814	0.44734	Up	0.0520799	1.84922	4:14109864:14113255:1	RGD1565355
ENSRNOT00000076438	16.7062	0	33.4124	Inf	Inf	0.0475395	0.859401	Up	4.46716e-22	0.72939	3:94596197:94603378:1	Cstf3
ENSRNOT00000076484	764.892	277.801	1251.98	4.50677	2.17209	0.0124248	0.437218	Up	4.69174	21.1749	2:30664695:30668414:1	Taf9
ENSRNOT00000076511	327.463	557.637	97.2892	0.174467	-2.51897	0.011019	0.408695	Down	1.75869	0.30864	1:128692112:128721956:-1	Synm
ENSRNOT00000076583	17.6889	0	35.3779	Inf	Inf	0.0424092	0.822119	Up	3.11317e-11	0.859728	4:8217556:8255379:-1	Kmt2e
ENSRNOT00000076607	166.675	6.10551	327.245	53.5984	5.74412	3.61767e-05	0.00842581	Up	0.0461329	2.58618	13:82552586:82566586:1	Slc19a2
ENSRNOT00000076722	3279.58	5578.4	980.753	0.175813	-2.50789	0.00578283	0.279783	Down	35.6145	6.26911	13:82552586:82566586:1	Slc19a2
ENSRNOT00000076753	533.033	195.376	870.689	4.45647	2.1559	0.0168428	0.518221	Up	1.46748	6.55655	14:45024351:45040175:1	Tlr6
ENSRNOT00000076762	17.1976	0	34.3952	Inf	Inf	0.0448839	0.841783	Up	1.94147e-09	1.15972	3:94585873:94592142:1	Cstf3
ENSRNOT00000076773	82.6891	151.62	13.7581	0.0907403	-3.46211	0.0203645	0.573845	Down	0.705217	0.0647842	10:69737422:69794975:1	Tmem132e
ENSRNOT00000076802	158.563	48.8441	268.282	5.49262	2.4575	0.0353392	0.757053	Up	0.442061	2.43292	1:252914684:252922486:-1	Ifit1bl
ENSRNOT00000076840	18.6717	0	37.3433	Inf	Inf	0.0379029	0.786075	Up	1.43337e-32	1.88427	14:81819799:81829639:1	Mxd4
ENSRNOT00000076924	7598.82	13046.5	2151.17	0.164885	-2.60046	0.0104451	0.395491	Down	120.42	19.8834	13:50481163:50499140:-1	Etnk2
ENSRNOT00000076946	17.1976	0	34.3952	Inf	Inf	0.0448839	0.841783	Up	0.000358247	0.270418	4:14212925:14241272:1	LOC103690020
ENSRNOT00000076952	17.6889	0	35.3779	Inf	Inf	0.0424092	0.822119	Up	7.79102e-27	1.1361	2:189330902:189333015:-1	Hax1
ENSRNOT00000076996	182.837	318.504	47.1705	0.1481	-2.75536	0.0156712	0.499037	Down	0.334458	0.0492421	2:8926850:9504134:-1	Adgrv1
ENSRNOT00000077025	26.966	53.932	0	0	#NAME?	0.013811	0.46461	Down	0.8072	0.0069277	10:71363688:71383378:-1	Dusp14
ENSRNOT00000077071	1228.19	274.748	2181.64	7.9405	2.98923	0.000710085	0.0661535	Up	0.526071	4.18291	8:87040799:87158368:-1	Col12a1
ENSRNOT00000077186	56.1196	6.10551	106.134	17.3832	4.11963	0.0212698	0.587364	Up	0.0693987	1.27029	1:73393850:73399579:-1	Lilrb4
ENSRNOT00000077189	352.341	604.446	100.237	0.165833	-2.59219	0.00817969	0.341332	Down	2.61178	0.435727	12:25411207:25488156:1	Gtf2i
ENSRNOT00000077293	32.0365	63.0903	0.982719	0.0155764	-6.0045	0.0193498	0.564158	Down	1.30481	0.0117246	12:22727335:22732943:1	Znhit1
ENSRNOT00000077317	623.834	1078.64	169.028	0.156704	-2.67388	0.00306722	0.186171	Down	21.0267	3.29466	12:48354196:48365784:-1	Dao
ENSRNOT00000077374	25.0593	0	50.1187	Inf	Inf	0.0179816	0.539988	Up	1.91908e-06	0.366369	4:121612332:121650541:1	Txnrd3
ENSRNOT00000077461	1885.19	3088.37	682.007	0.220831	-2.17899	0.0116003	0.417904	Down	26.5647	5.87118	10:47526531:47546345:-1	Aldh3a2
ENSRNOT00000077479	1525.58	682.8	2368.35	3.46859	1.79435	0.0339263	0.740244	Up	3.29163	11.4274	1:129766100:129780356:-1	Arrdc4
ENSRNOT00000077503	211.016	357.172	64.8594	0.181591	-2.46123	0.0235923	0.619454	Down	1.31407	0.240366	9:88237089:88356716:-1	Col4a4
ENSRNOT00000077517	77.248	6.10551	148.391	24.3044	4.60314	0.00505379	0.256922	Up	0.101753	2.33928	6:128050250:128080220:1	LOC299282
ENSRNOT00000077593	204.189	360.225	48.1532	0.133675	-2.90319	0.00936508	0.366413	Down	2.72615	0.366403	scaffold:Rnor_6.0:KL568458.1:65160:91925:1	AABR07024303.1
ENSRNOT00000077602	99.3418	5.08793	193.596	38.05	5.24982	0.000849479	0.0756225	Up	0.0645898	2.66352	5:173373888:173387104:1	Ube2j2
ENSRNOT00000077727	779.806	144.497	1415.11	9.79338	3.29181	0.000294843	0.0360104	Up	1.69343	16.6367	11:64882288:64919579:1	Pla1a
ENSRNOT00000077770	56.9848	113.97	0	0	#NAME?	0.000586198	0.0572758	Down	1.03832	1.10765e-05	6:135680615:135715273:1	Traf3
ENSRNOT00000077793	35.4127	2.03517	68.7903	33.8008	5.07898	0.0261823	0.658007	Up	0.0477866	1.90967	4:163217813:163227334:-1	Clec7a
ENSRNOT00000077856	533.22	91.5827	974.857	10.6446	3.41204	0.000338476	0.0398805	Up	1.15885	12.3183	7:140349138:140356209:-1	Rnd1
ENSRNOT00000077897	16.7902	33.5803	0	0	#NAME?	0.0454497	0.842144	Down	1.43274	5.07068e-05	6:64738380:64738856:-1	Ccdc85c
ENSRNOT00000077956	33.0367	64.1079	1.96544	0.0306583	-5.02758	0.0309166	0.71508	Down	0.541818	0.0202696	1:204717833:204817080:-1	Fam53b
ENSRNOT00000077960	18.3165	36.6331	0	0	#NAME?	0.0380561	0.786075	Down	0.190425	0.000631867	19:38454628:38484611:-1	Nfat5
ENSRNOT00000078059	153.193	50.8793	255.507	5.02183	2.32821	0.0470043	0.858246	Up	0.498925	2.48903	10:97735567:97750679:-1	Slc16a6
ENSRNOT00000078078	82.6891	151.62	13.7581	0.0907403	-3.46211	0.0203645	0.573845	Down	3.69779	0.34518	12:2273941:2277169:-1	Clec4g
ENSRNOT00000078080	1458.66	2226.48	690.851	0.310289	-1.68832	0.0450519	0.842144	Down	22.4334	6.9667	1:213511874:213535542:1	Cyp2e1
ENSRNOT00000078161	134.051	23.4045	244.697	10.4551	3.38614	0.00804831	0.340904	Up	0.348593	3.71812	8:13861459:13867749:1	Taf1d
ENSRNOT00000078202	125.024	242.185	7.86175	0.0324617	-4.94512	0.000539827	0.0535284	Down	2.25553	0.0767553	18:28418191:28428117:-1	Slc23a1
ENSRNOT00000078393	68.687	137.374	0	0	#NAME?	0.000193096	0.0280269	Down	2.16633	3.84316e-12	1:222169491:222177421:-1	Esrra
ENSRNOT00000078464	206.591	70.2134	342.969	4.88466	2.28826	0.0350521	0.754128	Up	0.259851	1.27013	9:14491584:14502933:-1	Unc5cl
ENSRNOT00000078532	825.929	255.414	1396.44	5.46737	2.45085	0.0050154	0.255619	Up	6.09011	33.3171	17:67899033:67904674:-1	Klf6
ENSRNOT00000078599	84.5661	3.05276	166.079	54.4031	5.76562	0.000855069	0.0757834	Up	0.0366747	1.84482	13:51022681:51030802:1	Chi3l1
ENSRNOT00000078616	69.1086	133.304	4.91359	0.0368602	-4.76179	0.00577189	0.279783	Down	1.01085	0.0339321	3:93703367:93789617:-1	Caprin1
ENSRNOT00000078692	202.44	0	404.88	Inf	Inf	3.07973e-08	2.37257e-05	Up	1.98981e-22	3.30125	1:102777296:102826965:-1	Hps5
ENSRNOT00000078725	18.6717	0	37.3433	Inf	Inf	0.0379029	0.786075	Up	0	0.790865	4:156270920:156276304:-1	Clec4e
ENSRNOT00000078861	293.074	500.652	85.4965	0.17077	-2.54987	0.0119532	0.426777	Down	5.57573	0.952233	15:42640146:42665848:1	Clu
ENSRNOT00000078868	3202.14	5819.57	584.718	0.100474	-3.3151	0.000408122	0.0446704	Down	13.0898	1.3169	12:48127149:48238887:-1	Acacb
ENSRNOT00000078919	4511.7	8376.76	646.629	0.0771932	-3.69538	0.000187911	0.0274733	Down	36.8792	2.8501	2:20857202:20901659:1	Acot12
ENSRNOT00000078956	78.4051	16.2814	140.529	8.63127	3.10957	0.0373351	0.782347	Up	0.294184	2.49235	4:100759878:100783750:-1	Kcmf1
ENSRNOT00000079036	477.65	805.927	149.373	0.185343	-2.43173	0.00860036	0.353727	Down	8.7077	1.61504	7:99142450:99181773:1	Cyp2b1
ENSRNOT00000079185	1848.58	750.978	2946.19	3.92314	1.97201	0.0213012	0.587364	Up	4.19506	16.4761	6:42852683:42859927:1	Odc1
ENSRNOT00000079260	172.304	47.8265	296.781	6.20537	2.63352	0.0222254	0.598354	Up	1.30163	8.16481	17:78491945:78499881:-1	Fam107b
ENSRNOT00000079275	23.5852	0	47.1705	Inf	Inf	0.021348	0.587364	Up	8.08706e-05	0.675078	8:48667282:48672732:-1	Hmbs
ENSRNOT00000079277	35.0718	68.1782	1.96544	0.0288279	-5.11639	0.0256194	0.647924	Down	3.4795	0.118205	4:102351036:102351819:1	AABR07060994.1
ENSRNOT00000079355	340.232	614.621	65.8422	0.107126	-3.22261	0.00150039	0.11158	Down	7.54442	0.812852	13:89586283:89591277:1	Nr1i3
ENSRNOT00000079360	516.932	890.387	143.477	0.16114	-2.63361	0.00431417	0.235457	Down	5.63384	0.909866	18:56431820:56457869:1	Csf1r
ENSRNOT00000079365	88.7598	161.796	15.7235	0.097181	-3.36318	0.0203188	0.573845	Down	2.37736	0.230436	X:33895769:34057399:1	Reps2
ENSRNOT00000079462	1284.7	1995.48	573.908	0.287603	-1.79785	0.0331164	0.736668	Down	6.26898	1.80597	10:16694792:16752205:-1	Crebrf
ENSRNOT00000079631	374.784	623.78	125.788	0.201655	-2.31004	0.0159227	0.501466	Down	10.1135	2.03596	1:89534416:89543967:-1	Hpn
ENSRNOT00000079646	494.964	95.653	894.274	9.34915	3.22483	0.000718749	0.066348	Up	1.24548	11.6394	10:25903911:25910325:-1	Ccng1
ENSRNOT00000079667	43.7387	86.4947	0.982719	0.0113616	-6.45969	0.00624167	0.29486	Down	0.755394	0.00735251	18:35683501:35780519:-1	Mcc
ENSRNOT00000079679	158.38	267.625	49.1359	0.1836	-2.44536	0.0361171	0.76634	Down	2.73626	0.498868	1:226687258:226710897:1	Vwce
ENSRNOT00000079707	38.8174	0	77.6348	Inf	Inf	0.00391279	0.21892	Up	1.27605e-05	2.14761	13:48689962:48704771:1	Nucks1
ENSRNOT00000079744	1910.08	3021.21	798.95	0.264447	-1.91895	0.0249992	0.641263	Down	26.5814	7.03679	4:153874852:153912155:1	Slc6a13
ENSRNOT00000079746	365.559	572.9	158.218	0.27617	-1.85637	0.0499769	0.876169	Down	3.8839	1.07606	3:81295024:81304181:-1	Mapk8ip1
ENSRNOT00000079779	47.2131	88.5299	5.89631	0.0666025	-3.90828	0.0375499	0.784085	Down	2.11716	0.14933	5:144106868:144108696:1	Lsm10
ENSRNOT00000079795	62.9159	116.005	9.82719	0.0847137	-3.56126	0.0313139	0.719225	Down	1.21465	0.0991362	14:6488660:6533524:-1	Abcg3l1
ENSRNOT00000079866	428.092	666.518	189.665	0.28456	-1.81319	0.04886	0.870461	Down	3.02218	0.862582	12:16084266:16112664:1	Ttyh3
ENSRNOT00000079917	505.62	832.385	178.855	0.21487	-2.21846	0.0148199	0.484247	Down	3.05714	0.65841	5:7628238:7941822:-1	Prex2
ENSRNOT00000079941	88.5299	177.06	0	0	#NAME?	3.43589e-05	0.00829167	Down	6.59719	9.25108e-12	scaffold:Rnor_6.0:KL568423.1:501:1430:1	LOC103694879
ENSRNOT00000080012	32.9211	0	65.8422	Inf	Inf	0.00732064	0.324408	Up	1.08687e-19	1.16394	8:62222648:62248013:-1	Scamp5
ENSRNOT00000080024	43.2571	1.01759	85.4965	84.019	6.39264	0.0069337	0.315357	Up	0.00462992	0.542133	7:76199311:76488216:-1	Ncald
ENSRNOT00000080096	93.583	185.201	1.96544	0.0106125	-6.55809	0.000213073	0.0292319	Down	5.51468	0.0475516	4:117750649:117751329:-1	LOC100910829
ENSRNOT00000080124	374.697	618.692	130.702	0.211255	-2.24294	0.0189461	0.558897	Down	2.60682	0.553131	1:244615821:244781633:1	Smarca2
ENSRNOT00000080147	72.5307	132.286	12.7753	0.0965736	-3.37223	0.0300821	0.706511	Down	1.10144	0.10767	14:86149146:86164368:-1	Gck
ENSRNOT00000080152	71.2645	1.01759	141.511	139.066	7.11963	0.000567951	0.0560397	Up	0.00582044	1.43505	7:125189827:125275977:1	Parvb
ENSRNOT00000080155	964.35	1509.08	419.621	0.278064	-1.84651	0.0294341	0.69918	Down	10.4847	2.92026	7:98822769:98960837:-1	Mtss1
ENSRNOT00000080163	72.3867	9.15827	135.615	14.808	3.8883	0.0154166	0.497131	Up	0.0816786	1.25887	6:132773145:132802206:-1	Wars
ENSRNOT00000080270	151.987	9.15827	294.816	32.1912	5.00859	0.000224943	0.030239	Up	0.176356	5.95714	6:99839960:99843245:-1	Gpx2
ENSRNOT00000080288	128.91	10.1759	247.645	24.3365	4.60505	0.000902683	0.0786119	Up	0.0507127	1.28912	8:44847157:44975457:1	Clmp
ENSRNOT00000080323	22.8957	45.7913	0	0	#NAME?	0.0222147	0.598354	Down	0.679926	7.39952e-18	10:56765392:56769457:1	Clec10a
ENSRNOT00000080324	50.2833	95.653	4.91359	0.0513689	-4.28296	0.0227745	0.605924	Down	1.11723	0.0557926	2:196487684:196496986:1	Cers2
ENSRNOT00000080325	30.5101	60.0375	0.982719	0.0163684	-5.93294	0.0226554	0.605049	Down	0.396976	0.00814608	1:68436593:68488229:1	Lnpep
ENSRNOT00000080410	52.5929	1.01759	104.168	102.368	6.67762	0.00292055	0.182808	Up	0.00458371	0.845119	4:179259308:179339795:-1	Bcat1
ENSRNOT00000080448	21.1285	0	42.2569	Inf	Inf	0.028499	0.690248	Up	0.00508361	1.17896	8:62193705:62215293:-1	NEWGENE_1306267
ENSRNOT00000080525	44.3269	6.10551	82.5484	13.5203	3.75706	0.0490971	0.870461	Up	0.0323961	0.409922	3:55623634:55648325:1	Dhrs9
ENSRNOT00000080562	594.274	70.2134	1118.33	15.9276	3.99346	3.59945e-05	0.00842581	Up	1.09298	17.3663	11:81424252:81444490:-1	Kng1l1
ENSRNOT00000080618	1982.64	3356	609.286	0.181551	-2.46155	0.00488112	0.254606	Down	30.8336	5.60715	2:58462949:58503489:1	Nadk2
ENSRNOT00000080675	124.067	14.2462	233.887	16.4175	4.03716	0.00289688	0.182808	Up	0.10669	1.76347	6:147094097:147172022:-1	Itgb8
ENSRNOT00000080703	38.326	0	76.6521	Inf	Inf	0.00411635	0.225275	Up	2.96518e-07	0.616546	10:64567466:64657089:-1	Abr
ENSRNOT00000080734	236.884	31.5451	442.223	14.0187	3.80929	0.000747105	0.0680205	Up	0.292747	4.08907	4:123467549:123510217:-1	Slc41a3
ENSRNOT00000080775	27.5336	1.01759	54.0495	53.1155	5.73106	0.0323564	0.730487	Up	0.015616	0.670218	12:22153983:22160337:1	Pcolce
ENSRNOT00000080797	837.672	223.869	1451.48	6.4836	2.6968	0.00221623	0.149465	Up	1.24437	8.05874	8:82328160:82339937:-1	Mapk6
ENSRNOT00000080811	88.2671	18.3165	158.218	8.63797	3.11069	0.0301161	0.706511	Up	0.161099	1.40195	4:8066907:8184681:1	Srpk2
ENSRNOT00000080812	29.0251	2.03517	56.015	27.5235	4.78259	0.0475158	0.859401	Up	0.0128801	0.466857	18:40082717:40123420:-1	Trim36
ENSRNOT00000080844	16.7902	33.5803	0	0	#NAME?	0.0454497	0.842144	Down	0.41404	2.83771e-10	18:65388685:65507590:1	Tcf4
ENSRNOT00000080859	33.9038	0	67.8076	Inf	Inf	0.00657006	0.308916	Up	4.94916e-26	0.645791	6:107485249:107493798:1	Acot1
ENSRNOT00000080930	45.2302	87.5123	2.94816	0.0336885	-4.8916	0.016757	0.516372	Down	1.11758	0.0330801	9:94702129:94724897:1	Neu2
ENSRNOT00000080941	40.7034	81.4068	0	0	#NAME?	0.0030432	0.185839	Down	1.22468	0.00339937	2:243108449:243151566:1	Dnajb14
ENSRNOT00000080995	323.863	118.04	529.685	4.48734	2.16586	0.0270466	0.665533	Up	1.20805	5.43473	1:282640722:282702424:1	Ces2
ENSRNOT00000081017	1349.18	2059.59	638.767	0.310143	-1.689	0.0447055	0.841783	Down	8.17216	2.53694	1:41325462:41594796:1	Esr1
ENSRNOT00000081021	400.1	65.1255	735.074	11.287	3.4966	0.000466764	0.0472186	Up	0.0883351	1.00231	7:117230321:117257402:-1	Plec
ENSRNOT00000081061	133.725	262.537	4.91359	0.0187158	-5.7396	0.000103682	0.0180586	Down	2.29855	0.042122	X:53360839:53517142:1	Dmd
ENSRNOT00000081106	24.422	48.8441	0	0	#NAME?	0.0185569	0.552294	Down	1.2308	1.01509e-07	9:81615251:81632360:1	Pnkd
ENSRNOT00000081145	48.8441	97.6882	0	0	#NAME?	0.00131828	0.103145	Down	1.46456	5.3655e-06	8:32188617:32214469:1	Zbtb44
ENSRNOT00000081146	6458.74	12408.4	509.048	0.0410244	-4.60737	2.09809e-05	0.00560329	Down	53.3004	2.18859	9:65013862:65099433:1	Aox3
ENSRNOT00000081201	33.0715	66.143	0	0	#NAME?	0.00684226	0.315357	Down	0.694361	6.14134e-06	4:118484788:118534266:-1	Gmcl1
ENSRNOT00000081240	2633.85	4111.04	1156.66	0.281354	-1.82954	0.0356209	0.761459	Down	53.4588	15.0545	20:5351621:5418013:1	RT1-A1
ENSRNOT00000081280	179.099	14.2462	343.952	24.1434	4.59356	0.000284063	0.0349067	Up	0.0518874	1.25315	10:31278764:31359699:-1	Cyfip2
ENSRNOT00000081321	378.384	604.446	152.321	0.252002	-1.98849	0.0354387	0.758373	Down	1.99876	0.504396	16:19686630:19753133:1	Myo9b
ENSRNOT00000081443	1987.41	3204.38	770.451	0.240437	-2.05627	0.0170237	0.522181	Down	11.0246	2.65469	11:62014925:62451184:-1	Zbtb20
ENSRNOT00000081553	25.5507	0	51.1014	Inf	Inf	0.0169921	0.522013	Up	3.44309e-07	0.410596	2:94693600:94730308:-1	Zbtb10
ENSRNOT00000081570	75.8101	151.62	0	0	#NAME?	0.000101552	0.0178429	Down	0.869819	0.000919606	14:80982162:81023682:-1	Rgs12
ENSRNOT00000081621	1271.52	2115.56	427.483	0.202066	-2.3071	0.00721534	0.321878	Down	8.97384	1.81587	9:16003058:16072988:1	Ubr2
ENSRNOT00000081746	117.958	30.5276	205.388	6.72796	2.75017	0.0323942	0.730487	Up	0.533646	3.65429	1:126979579:126989344:1	Vimp
ENSRNOT00000081756	765.371	1166.15	364.589	0.312642	-1.67742	0.0496627	0.875574	Down	10.2439	3.20551	7:3335742:3342491:-1	Rdh5
ENSRNOT00000081841	71.404	9.15827	133.65	14.5933	3.86724	0.0163688	0.509111	Up	0.0853406	1.21151	5:151886035:151895016:-1	Pigv
ENSRNOT00000081892	25.4396	50.8793	0	0	#NAME?	0.0164782	0.510926	Down	0.447847	0.000204621	13:72918577:73055631:-1	Xpr1
ENSRNOT00000081920	19.8429	39.6858	0	0	#NAME?	0.0318959	0.722708	Down	0.447168	0.00326259	17:9736786:9744341:1	F12
ENSRNOT00000081924	4547.34	419.245	8675.44	20.693	4.37107	1.90068e-05	0.00514469	Up	3.46255	71.782	20:4877324:4879779:-1	Hspa1b
ENSRNOT00000081970	174.996	291.029	58.9631	0.202602	-2.30328	0.0416979	0.822119	Down	15.0463	3.0597	17:44747796:44748188:-1	LOC103690190
ENSRNOT00000082005	516.933	1033.87	0	0	#NAME?	7.88433e-13	1.43566e-09	Down	6.69053	2.24123e-05	9:119542328:119588715:1	Lpin2
ENSRNOT00000082027	3210.03	5132.7	1287.36	0.250816	-1.9953	0.0249975	0.641263	Down	99.9798	25.1012	6:111180108:111186546:1	Gstz1
ENSRNOT00000082030	61.9158	114.987	8.84447	0.076917	-3.70055	0.0273732	0.670275	Down	1.13256	0.0848971	10:70689911:70721890:1	Taf15
ENSRNOT00000082035	128.154	23.4045	232.904	9.95128	3.31488	0.0101595	0.38909	Up	0.293984	2.89999	10:13311789:13324536:-1	RGD1562673
ENSRNOT00000082082	67.6694	135.339	0	0	#NAME?	0.000212104	0.0292319	Down	1.38012	1.3625e-07	10:3179352:3213237:1	Rrn3
ENSRNOT00000082091	567.529	1004.36	130.702	0.130135	-2.94192	0.0014486	0.108606	Down	20.3658	2.65332	16:60418423:60426561:-1	Ppp1r3b
ENSRNOT00000082097	33.4124	0	66.8249	Inf	Inf	0.00693344	0.315357	Up	5.66148e-05	1.20765	8:111839091:111850075:-1	Cdv3
ENSRNOT00000082156	1794.17	3339.71	248.628	0.0744458	-3.74767	4.6939e-05	0.00989671	Down	14.989	1.11551	2:181896305:181900856:-1	Lrat
ENSRNOT00000082205	32.5627	65.1255	0	0	#NAME?	0.00724423	0.322449	Down	0.814435	2.65585e-05	8:49676616:49703410:1	Fxyd6
ENSRNOT00000082209	112.239	12.211	212.267	17.3832	4.11963	0.00335546	0.195947	Up	0.104519	1.86504	10:109894286:109903784:1	Lrrc45
ENSRNOT00000082241	18.1803	0	36.3606	Inf	Inf	0.0400894	0.801061	Up	1.8236e-14	0.327214	4:67359596:67372399:1	Adck2
ENSRNOT00000082388	4925.32	8370.66	1479.97	0.176805	-2.49977	0.00854053	0.35212	Down	43.1218	7.63591	1:219764001:219859844:1	Pc
ENSRNOT00000082421	35.8692	0	71.7385	Inf	Inf	0.00532043	0.264437	Up	1.59615e-05	1.85248	X:63281779:63291371:-1	Eif2s3
ENSRNOT00000082442	394.775	127.198	662.352	5.20725	2.38052	0.0124421	0.437218	Up	1.25876	6.57067	1:233124092:233145941:-1	Psat1
ENSRNOT00000082469	85.4597	169.937	0.982719	0.00578285	-7.434	0.000164319	0.0253177	Down	1.85597	0.01087	13:90533365:90591796:1	Dcaf8
ENSRNOT00000082530	1022.13	1583.36	460.895	0.291086	-1.78048	0.0350418	0.754128	Down	23.5632	6.87119	9:4930818:4945352:-1	Sult1c3
ENSRNOT00000082532	117.944	1.01759	234.87	230.811	7.85057	1.74182e-05	0.00477926	Up	0.00925484	3.99467	2:264270096:264293010:-1	Cth
ENSRNOT00000082551	177.447	348.014	6.87903	0.0197665	-5.6608	3.02042e-05	0.00746901	Down	2.38017	0.0473462	10:109893700:109904072:1	Lrrc45
ENSRNOT00000082561	183.748	27.4748	340.021	12.3757	3.62944	0.00228675	0.151668	Up	0.244055	3.05034	3:22829817:22888598:1	Nek6
ENSRNOT00000082570	61.9636	3.05276	120.874	39.5952	5.30725	0.00463701	0.246364	Up	0.0434474	1.55684	6:43743702:43794342:1	Grhl1
ENSRNOT00000082579	275.848	441.632	110.064	0.249222	-2.0045	0.0463155	0.8511	Down	3.03133	0.754008	9:4081457:4280791:1	RGD1562392
ENSRNOT00000082594	30.4927	59.0199	1.96544	0.0333012	-4.90828	0.0393708	0.798984	Down	0.415613	0.0122974	11:71151132:71197035:1	Rubcn
ENSRNOT00000082675	362.157	87.5123	636.802	7.27671	2.86329	0.00372443	0.211332	Up	2.34224	17.0508	15:24159647:24165418:1	Lgals3
ENSRNOT00000082680	22.6025	0	45.2051	Inf	Inf	0.0239548	0.623229	Up	0.00432627	0.708591	6:127946686:128080217:1	LOC299282
ENSRNOT00000082697	465.76	742.837	188.682	0.254002	-1.97709	0.0304228	0.711049	Down	8.24756	2.10202	1:165665909:165680206:-1	Plekhb1
ENSRNOT00000082719	44.2746	3.05276	85.4965	28.0063	4.80768	0.019264	0.564158	Up	0.0243837	0.796095	17:43518761:43543185:-1	Slc17a3
ENSRNOT00000082806	85.3203	161.796	8.84447	0.0546643	-4.19326	0.00652253	0.307403	Down	1.32651	0.0745221	4:114800900:114807204:1	LOC103692170
ENSRNOT00000082855	1129.53	1858.11	400.949	0.215783	-2.21234	0.00973446	0.375686	Down	17.523	3.7897	11:87058640:87075625:1	Prodh
ENSRNOT00000082857	408.269	140.427	676.11	4.81468	2.26744	0.0161794	0.505574	Up	4.37248	21.0153	3:72070390:72071895:-1	RGD1563348
ENSRNOT00000082891	3582.46	1288.26	5876.66	4.56169	2.18957	0.0156455	0.499037	Up	5.73973	26.218	18:11826714:11858754:-1	Dsc2
ENSRNOT00000082931	21.6198	0	43.2396	Inf	Inf	0.0268959	0.664273	Up	1.44894e-12	0.538792	1:43792199:43831932:-1	Cnksr3
ENSRNOT00000082999	68.7903	0	137.581	Inf	Inf	0.000207194	0.0290217	Up	0.000173407	2.74515	20:3372413:3374344:-1	Ppp1r18
ENSRNOT00000083045	29.4816	0	58.9631	Inf	Inf	0.0108115	0.403311	Up	1.04291e-11	1.06218	3:61439857:61488696:-1	Lnp
ENSRNOT00000083067	151.958	265.59	38.326	0.144305	-2.7928	0.0197159	0.568216	Down	2.22188	0.324711	11:38035450:38059312:1	Mx2
ENSRNOT00000083134	726.992	1163.1	290.885	0.250094	-1.99946	0.0211044	0.587112	Down	4.08418	1.02467	3:15038267:15060284:1	Dab2ip
ENSRNOT00000083144	379.648	133.304	625.992	4.69598	2.23143	0.0192641	0.564158	Up	0.371408	1.74549	6:33062402:33088582:-1	LOC102556253
ENSRNOT00000083172	66.8772	3.05276	130.702	42.8143	5.42002	0.00316686	0.189061	Up	0.016082	0.704397	17:66210885:66288202:-1	Mtr
ENSRNOT00000083194	91.3928	0	182.786	Inf	Inf	2.9925e-05	0.00746901	Up	1.40648e-10	3.0184	8:22291463:22301325:1	Atg4d
ENSRNOT00000083303	3847.78	6077.02	1618.54	0.266337	-1.90867	0.0347437	0.75153	Down	60.7636	16.2036	8:114927722:114940163:-1	Alas1
ENSRNOT00000083344	17.1976	0	34.3952	Inf	Inf	0.0448839	0.841783	Up	0.00143286	0.304054	2:257453347:257484587:-1	Nexn
ENSRNOT00000083351	211.703	24.422	398.984	16.337	4.03007	0.0005999	0.0583301	Up	0.145406	2.34359	3:109862117:109872871:1	Thbs1
ENSRNOT00000083410	171.568	33.5803	309.556	9.21839	3.20451	0.00682024	0.315357	Up	0.431766	3.96557	8:82560971:82577019:1	Lysmd2
[truncated: 187 more rows]

## Sheet: 24h vs 0h
id	baseMean	baseMean_control_0h	baseMean_case_24h	foldChange	log2FoldChange	pval	padj	up_down	expression_0h	expression_24h	chromosome_position	gene_symbol
[truncated: 1,143 more rows]

[truncated: 5 more sheets: 30h vs 0h, 36h vs 0h, 72 h vs 0h, 120h vs 0h, 168h vs 0h]
