# Supplementary material for: lncRNA Expression Reveals the Potential Regulatory Roles in Hepatocyte Proliferation during Rat Liver Regeneration
Source: Biomed Res Int. 2019 Nov 11;2019:8597953. doi: 10.1155/2019/8597953 (PMC6885160; doi:10.1155/2019/8597953)
Supplement: Supplementary Materials — Table S1: results of analyzing differentially expressed lncRNAs at 2, 6, 12, 24, 30, 36, 72,120, and 168 h after PH was compared with CG. Table S2: results of analyzing differentially expressed mRNAs at 2, 6, 12, 24, 30, 36, 72,120, and 168 h after PH was compared with CG. Table S3: results of GO enrichment analysis of differentially expressed mRNAs. Table S4: screened coexpression pairs between DE lncRNAs and proliferation-related DE mRNAs based on the Pearson correlation coefficient. [file 8597953.f1.zip › 8597953.f1/Table S3.xlsx]

## Sheet: GO enrichment
category	GO terms	Count	P-Value	-log10(P-Value)
GOTERM_BP_DIRECT	response to drug	159	4.7e-15	14.3279
GOTERM_BP_DIRECT	cell division	74	7.6e-15	14.1192
GOTERM_BP_DIRECT	chromosome segregation	36	1e-11	11
GOTERM_BP_DIRECT	response to organic cyclic compound	91	1.1e-11	10.9586
GOTERM_BP_DIRECT	aging	99	7.2e-11	10.1427
GOTERM_BP_DIRECT	DNA replication	40	8.7e-11	10.0605
GOTERM_BP_DIRECT	response to estradiol	70	4.6e-10	9.33724
GOTERM_BP_DIRECT	circadian regulation of gene expression	32	6.4e-10	9.19382
GOTERM_BP_DIRECT	angiogenesis	63	7.8e-09	8.10791
GOTERM_BP_DIRECT	mitotic nuclear division	48	1e-08	8
GOTERM_BP_DIRECT	cellular response to insulin stimulus	47	1.8e-08	7.74473
GOTERM_BP_DIRECT	mitotic sister chromatid segregation	17	5.6e-08	7.25181
GOTERM_BP_DIRECT	oxidation-reduction process	160	8.4e-08	7.07572
GOTERM_BP_DIRECT	response to lipopolysaccharide	82	1.1e-07	6.95861
GOTERM_BP_DIRECT	cellular response to DNA damage stimulus	71	1.2e-07	6.92082
GOTERM_BP_DIRECT	cell adhesion	77	2.1e-07	6.67778
GOTERM_BP_DIRECT	protein phosphorylation	127	3.6e-07	6.4437
GOTERM_BP_DIRECT	organ regeneration	36	4e-07	6.39794
GOTERM_BP_DIRECT	DNA replication initiation	15	9.1e-07	6.04096
GOTERM_BP_DIRECT	nucleosome assembly	36	1e-06	6
GOTERM_BP_DIRECT	regulation of circadian rhythm	23	1.9e-06	5.72125
GOTERM_BP_DIRECT	regulation of cell shape	43	2.7e-06	5.56864
GOTERM_BP_DIRECT	response to organic substance	49	3e-06	5.52288
GOTERM_BP_DIRECT	negative regulation of cell proliferation	97	3.4e-06	5.46852
GOTERM_BP_DIRECT	response to toxic substance	41	3.6e-06	5.4437
GOTERM_BP_DIRECT	double-strand break repair via homologous recombination	28	4.1e-06	5.38722
GOTERM_BP_DIRECT	negative regulation of gene expression	62	4.8e-06	5.31876
GOTERM_BP_DIRECT	response to nutrient levels	39	4.9e-06	5.3098
GOTERM_BP_DIRECT	regulation of cell cycle	41	5.7e-06	5.24413
GOTERM_BP_DIRECT	lipid metabolic process	33	6.8e-06	5.16749
GOTERM_BP_DIRECT	positive regulation of transcription, DNA-templated	135	8.1e-06	5.09151
GOTERM_BP_DIRECT	cellular response to interleukin-1	35	8.7e-06	5.06048
GOTERM_BP_DIRECT	negative regulation of apoptotic process	124	9.5e-06	5.02228
GOTERM_BP_DIRECT	response to nutrient	44	1.2e-05	4.92082
GOTERM_BP_DIRECT	fatty acid metabolic process	25	1.2e-05	4.92082
GOTERM_BP_DIRECT	DNA repair	51	1.2e-05	4.92082
GOTERM_BP_DIRECT	positive regulation of apoptotic process	87	1.5e-05	4.82391
GOTERM_BP_DIRECT	DNA biosynthetic process	15	2.5e-05	4.60206
GOTERM_BP_DIRECT	response to glucocorticoid	42	2.9e-05	4.5376
GOTERM_BP_DIRECT	response to cytokine	34	3e-05	4.52288
GOTERM_BP_DIRECT	response to mechanical stimulus	35	3.6e-05	4.4437
GOTERM_BP_DIRECT	transcription, DNA-templated	173	4e-05	4.39794
GOTERM_BP_DIRECT	spindle organization	11	4.5e-05	4.34679
GOTERM_BP_DIRECT	response to hypoxia	71	4.8e-05	4.31876
GOTERM_BP_DIRECT	liver development	44	5.3e-05	4.27572
GOTERM_BP_DIRECT	response to glucose	35	5.6e-05	4.25181
GOTERM_BP_DIRECT	positive regulation of cell migration	57	5.8e-05	4.23657
GOTERM_BP_DIRECT	transmembrane transport	60	6.7e-05	4.17393
GOTERM_BP_DIRECT	cell cycle	38	7e-05	4.1549
GOTERM_BP_DIRECT	response to ethanol	54	7.8e-05	4.10791
GOTERM_BP_DIRECT	circadian rhythm	38	8.5e-05	4.07058
GOTERM_BP_DIRECT	cell-cell junction organization	13	8.9e-05	4.05061
GOTERM_BP_DIRECT	negative regulation of transcription from RNA polymerase II promoter	163	8.9e-05	4.05061
GOTERM_BP_DIRECT	triglyceride metabolic process	18	9e-05	4.04576
GOTERM_BP_DIRECT	intracellular receptor signaling pathway	16	9.2e-05	4.03621
GOTERM_BP_DIRECT	entrainment of circadian clock by photoperiod	12	9.4e-05	4.02687
GOTERM_BP_DIRECT	cellular response to organic cyclic compound	38	0.0001	4
GOTERM_BP_DIRECT	phosphorylation	42	0.00011	3.95861
GOTERM_BP_DIRECT	drug metabolic process	15	0.00011	3.95861
GOTERM_BP_DIRECT	response to lipid	15	0.00011	3.95861
GOTERM_BP_DIRECT	glutathione metabolic process	21	0.00012	3.92082
GOTERM_BP_DIRECT	cellular aromatic compound metabolic process	7	0.00012	3.92082
GOTERM_BP_DIRECT	response to organonitrogen compound	25	0.00013	3.88606
GOTERM_BP_DIRECT	cellular response to testosterone stimulus	9	0.00014	3.85387
GOTERM_BP_DIRECT	female pregnancy	35	0.00016	3.79588
GOTERM_BP_DIRECT	insulin receptor signaling pathway	22	0.00017	3.76955
GOTERM_BP_DIRECT	mitotic cell cycle	19	0.0002	3.69897
GOTERM_BP_DIRECT	protein autophosphorylation	51	0.00022	3.65758
GOTERM_BP_DIRECT	regulation of cell proliferation	61	0.00022	3.65758
GOTERM_BP_DIRECT	protein localization to kinetochore	8	0.00025	3.60206
GOTERM_BP_DIRECT	chromatin silencing	18	0.00026	3.58503
GOTERM_BP_DIRECT	negative regulation of epithelial cell proliferation	25	0.00028	3.55284
GOTERM_BP_DIRECT	positive regulation of gene expression	88	0.0003	3.52288
GOTERM_BP_DIRECT	cellular response to hydrogen peroxide	27	0.00032	3.49485
GOTERM_BP_DIRECT	regulation of protein catabolic process	11	0.00032	3.49485
GOTERM_BP_DIRECT	cellular response to peptide	11	0.00032	3.49485
GOTERM_BP_DIRECT	cellular response to tumor necrosis factor	39	0.00032	3.49485
GOTERM_BP_DIRECT	regulation of cell migration	26	0.00034	3.46852
GOTERM_BP_DIRECT	cellular response to cholesterol	10	0.00034	3.46852
GOTERM_BP_DIRECT	positive regulation of peptidyl-tyrosine phosphorylation	32	0.00035	3.45593
GOTERM_BP_DIRECT	cellular response to UV	19	0.00038	3.42022
GOTERM_BP_DIRECT	regulation of inflammatory response	22	0.00038	3.42022
GOTERM_BP_DIRECT	triglyceride homeostasis	13	0.00039	3.40894
GOTERM_BP_DIRECT	cellular response to gamma radiation	13	0.00039	3.40894
GOTERM_BP_DIRECT	positive regulation of cell proliferation	113	0.0004	3.39794
GOTERM_BP_DIRECT	DNA duplex unwinding	16	0.00043	3.36653
GOTERM_BP_DIRECT	G2/M transition of mitotic cell cycle	16	0.00043	3.36653
GOTERM_BP_DIRECT	response to hormone	31	0.00045	3.34679
GOTERM_BP_DIRECT	wound healing	37	0.00046	3.33724
GOTERM_BP_DIRECT	negative regulation of ERK1 and ERK2 cascade	23	0.00048	3.31876
GOTERM_BP_DIRECT	positive regulation of fibroblast proliferation	24	0.00058	3.23657
GOTERM_BP_DIRECT	response to cobalt ion	8	0.00059	3.22915
GOTERM_BP_DIRECT	cholesterol efflux	13	0.0006	3.22185
GOTERM_BP_DIRECT	positive regulation of cell cycle	16	0.0006	3.22185
GOTERM_BP_DIRECT	cellular response to hypoxia	39	0.00061	3.21467
GOTERM_BP_DIRECT	cellular response to hydroperoxide	6	0.00063	3.20066
GOTERM_BP_DIRECT	mitotic chromosome condensation	9	0.00063	3.20066
GOTERM_BP_DIRECT	cellular response to fibroblast growth factor stimulus	17	0.00064	3.19382
GOTERM_BP_DIRECT	cellular response to transforming growth factor beta stimulus	26	0.00065	3.18709
GOTERM_BP_DIRECT	steroid hormone mediated signaling pathway	21	0.00065	3.18709
GOTERM_BP_DIRECT	cellular response to calcium ion	20	0.00066	3.18046
GOTERM_BP_DIRECT	mitotic cytokinesis	14	0.0007	3.1549
GOTERM_BP_DIRECT	response to peptide hormone	37	0.00074	3.13077
GOTERM_BP_DIRECT	cell morphogenesis	26	0.00079	3.10237
GOTERM_BP_DIRECT	in utero embryonic development	68	0.0008	3.09691
GOTERM_BP_DIRECT	positive regulation of GTPase activity	91	0.00086	3.0655
GOTERM_BP_DIRECT	acyl-CoA metabolic process	13	0.00089	3.05061
GOTERM_BP_DIRECT	positive regulation of mitotic cell cycle	14	0.001	3
GOTERM_BP_DIRECT	arachidonic acid metabolic process	14	0.001	3
GOTERM_BP_DIRECT	iron ion homeostasis	14	0.001	3
GOTERM_BP_DIRECT	response to progesterone	21	0.0011	2.95861
GOTERM_BP_DIRECT	response to cold	19	0.0011	2.95861
GOTERM_BP_DIRECT	establishment of protein localization	18	0.0011	2.95861
GOTERM_BP_DIRECT	positive regulation of neuron migration	9	0.0012	2.92082
GOTERM_BP_DIRECT	negative regulation of cell-matrix adhesion	9	0.0012	2.92082
GOTERM_BP_DIRECT	apoptotic process	84	0.0012	2.92082
GOTERM_BP_DIRECT	regulation of insulin receptor signaling pathway	8	0.0012	2.92082
GOTERM_BP_DIRECT	positive regulation of protein phosphorylation	48	0.0012	2.92082
GOTERM_BP_DIRECT	cellular response to platelet-derived growth factor stimulus	13	0.0013	2.88606
GOTERM_BP_DIRECT	male gonad development	40	0.0013	2.88606
GOTERM_BP_DIRECT	peptidyl-serine phosphorylation	37	0.0014	2.85387
GOTERM_BP_DIRECT	osteoblast differentiation	34	0.0014	2.85387
GOTERM_BP_DIRECT	intrinsic apoptotic signaling pathway in response to DNA damage	19	0.0015	2.82391
GOTERM_BP_DIRECT	mitotic spindle assembly	15	0.0015	2.82391
GOTERM_BP_DIRECT	positive regulation of nitric oxide biosynthetic process	17	0.0015	2.82391
GOTERM_BP_DIRECT	glucose metabolic process	22	0.0016	2.79588
GOTERM_BP_DIRECT	cellular response to drug	29	0.0016	2.79588
GOTERM_BP_DIRECT	bile acid and bile salt transport	10	0.0017	2.76955
GOTERM_BP_DIRECT	negative regulation of cell migration	30	0.0017	2.76955
GOTERM_BP_DIRECT	neutrophil chemotaxis	20	0.0018	2.74473
GOTERM_BP_DIRECT	xenobiotic metabolic process	13	0.0018	2.74473
GOTERM_BP_DIRECT	actin cytoskeleton reorganization	19	0.0018	2.74473
GOTERM_BP_DIRECT	acetyl-CoA metabolic process	6	0.0019	2.72125
GOTERM_BP_DIRECT	kinetochore assembly	6	0.0019	2.72125
GOTERM_BP_DIRECT	response to ionizing radiation	22	0.0019	2.72125
GOTERM_BP_DIRECT	positive regulation of inflammatory response	21	0.0021	2.67778
GOTERM_BP_DIRECT	positive regulation of G1/S transition of mitotic cell cycle	11	0.0021	2.67778
GOTERM_BP_DIRECT	DNA strand renaturation	7	0.0023	2.63827
GOTERM_BP_DIRECT	positive regulation of DNA damage response, signal transduction by p53 class mediator	7	0.0023	2.63827
GOTERM_BP_DIRECT	liver regeneration	19	0.0023	2.63827
GOTERM_BP_DIRECT	cellular response to estradiol stimulus	18	0.0024	2.61979
GOTERM_BP_DIRECT	response to cAMP	24	0.0025	2.60206
GOTERM_BP_DIRECT	response to antibiotic	17	0.0025	2.60206
GOTERM_BP_DIRECT	microtubule-based movement	21	0.0025	2.60206
GOTERM_BP_DIRECT	chromosome organization	13	0.0025	2.60206
GOTERM_BP_DIRECT	cellular response to extracellular stimulus	10	0.0026	2.58503
GOTERM_BP_DIRECT	cellular response to lipopolysaccharide	43	0.0027	2.56864
GOTERM_BP_DIRECT	DNA replication-dependent nucleosome assembly	11	0.0031	2.50864
GOTERM_BP_DIRECT	erythrocyte development	11	0.0031	2.50864
GOTERM_BP_DIRECT	response to activity	27	0.0031	2.50864
GOTERM_BP_DIRECT	negative regulation of receptor-mediated endocytosis	5	0.0032	2.49485
GOTERM_BP_DIRECT	T cell proliferation involved in immune response	5	0.0032	2.49485
GOTERM_BP_DIRECT	negative regulation of transcription factor import into nucleus	5	0.0032	2.49485
GOTERM_BP_DIRECT	positive regulation of smooth muscle cell proliferation	25	0.0032	2.49485
GOTERM_BP_DIRECT	DNA damage checkpoint	12	0.0033	2.48149
GOTERM_BP_DIRECT	regulation of angiogenesis	12	0.0033	2.48149
GOTERM_BP_DIRECT	positive regulation of DNA replication	16	0.0034	2.46852
GOTERM_BP_DIRECT	negative regulation of tumor necrosis factor production	16	0.0034	2.46852
GOTERM_BP_DIRECT	fatty acid biosynthetic process	16	0.0034	2.46852
GOTERM_BP_DIRECT	negative regulation of smooth muscle cell proliferation	15	0.0035	2.45593
GOTERM_BP_DIRECT	cellular response to fatty acid	13	0.0035	2.45593
GOTERM_BP_DIRECT	steroid metabolic process	13	0.0035	2.45593
GOTERM_BP_DIRECT	actin cytoskeleton organization	35	0.0038	2.42022
GOTERM_BP_DIRECT	regulation of cell death	8	0.0038	2.42022
GOTERM_BP_DIRECT	intracellular signal transduction	84	0.0039	2.40894
GOTERM_BP_DIRECT	positive regulation of focal adhesion assembly	10	0.0039	2.40894
GOTERM_BP_DIRECT	negative regulation of osteoclast differentiation	10	0.0039	2.40894
GOTERM_BP_DIRECT	positive regulation of dendrite development	10	0.0039	2.40894
GOTERM_BP_DIRECT	peptidyl-tyrosine phosphorylation	32	0.004	2.39794
GOTERM_BP_DIRECT	positive regulation of fat cell differentiation	17	0.0041	2.38722
GOTERM_BP_DIRECT	cholesterol metabolic process	20	0.0041	2.38722
GOTERM_BP_DIRECT	negative regulation of protein ubiquitination	16	0.0043	2.36653
GOTERM_BP_DIRECT	positive regulation of cell-substrate adhesion	16	0.0043	2.36653
GOTERM_BP_DIRECT	neural tube closure	27	0.0043	2.36653
GOTERM_BP_DIRECT	lung development	35	0.0043	2.36653
GOTERM_BP_DIRECT	negative regulation of cytokine production	7	0.0044	2.35655
GOTERM_BP_DIRECT	negative regulation of tumor necrosis factor-mediated signaling pathway	7	0.0044	2.35655
GOTERM_BP_DIRECT	triglyceride catabolic process	11	0.0044	2.35655
GOTERM_BP_DIRECT	positive regulation of DNA-directed DNA polymerase activity	6	0.0044	2.35655
GOTERM_BP_DIRECT	low-density lipoprotein particle clearance	6	0.0044	2.35655
GOTERM_BP_DIRECT	DNA unwinding involved in DNA replication	6	0.0044	2.35655
GOTERM_BP_DIRECT	Type I pneumocyte differentiation	6	0.0044	2.35655
GOTERM_BP_DIRECT	DNA damage induced protein phosphorylation	6	0.0044	2.35655
GOTERM_BP_DIRECT	protein K6-linked ubiquitination	6	0.0044	2.35655
GOTERM_BP_DIRECT	regulation of attachment of spindle microtubules to kinetochore	6	0.0044	2.35655
GOTERM_BP_DIRECT	negative regulation of inflammatory response	25	0.0045	2.34679
GOTERM_BP_DIRECT	cell proliferation	55	0.0045	2.34679
GOTERM_BP_DIRECT	mitotic spindle organization	12	0.0046	2.33724
GOTERM_BP_DIRECT	mitotic cell cycle checkpoint	12	0.0046	2.33724
GOTERM_BP_DIRECT	mitochondrion organization	21	0.0046	2.33724
GOTERM_BP_DIRECT	telomere maintenance	14	0.0046	2.33724
GOTERM_BP_DIRECT	semaphorin-plexin signaling pathway	13	0.0047	2.3279
GOTERM_BP_DIRECT	gluconeogenesis	13	0.0047	2.3279
GOTERM_BP_DIRECT	glucose homeostasis	33	0.0047	2.3279
GOTERM_BP_DIRECT	cytoskeleton organization	34	0.0048	2.31876
GOTERM_BP_DIRECT	regulation of mitotic nuclear division	9	0.005	2.30103
GOTERM_BP_DIRECT	phosphate ion transmembrane transport	9	0.005	2.30103
GOTERM_BP_DIRECT	positive regulation of monocyte chemotaxis	9	0.005	2.30103
GOTERM_BP_DIRECT	negative regulation of lipid catabolic process	9	0.005	2.30103
GOTERM_BP_DIRECT	regulation of cell growth	20	0.005	2.30103
GOTERM_BP_DIRECT	SMAD protein signal transduction	20	0.005	2.30103
GOTERM_BP_DIRECT	negative regulation of neuron apoptotic process	40	0.0052	2.284
GOTERM_BP_DIRECT	fatty acid beta-oxidation	16	0.0054	2.26761
GOTERM_BP_DIRECT	establishment of mitotic spindle orientation	10	0.0057	2.24413
GOTERM_BP_DIRECT	camera-type eye morphogenesis	10	0.0057	2.24413
GOTERM_BP_DIRECT	inactivation of MAPK activity	10	0.0057	2.24413
GOTERM_BP_DIRECT	positive regulation of protein dephosphorylation	10	0.0057	2.24413
GOTERM_BP_DIRECT	negative regulation of extrinsic apoptotic signaling pathway via death domain receptors	10	0.0057	2.24413
GOTERM_BP_DIRECT	response to interleukin-1	15	0.0057	2.24413
GOTERM_BP_DIRECT	response to virus	24	0.0058	2.23657
GOTERM_BP_DIRECT	fat cell differentiation	24	0.0058	2.23657
GOTERM_BP_DIRECT	inflammatory response	67	0.0059	2.22915
GOTERM_BP_DIRECT	response to osmotic stress	11	0.0061	2.21467
GOTERM_BP_DIRECT	bicellular tight junction assembly	11	0.0061	2.21467
GOTERM_BP_DIRECT	cholesterol biosynthetic process	11	0.0061	2.21467
GOTERM_BP_DIRECT	cellular response to ethanol	11	0.0061	2.21467
GOTERM_BP_DIRECT	cellular response to ionizing radiation	13	0.0061	2.21467
GOTERM_BP_DIRECT	blood vessel morphogenesis	13	0.0061	2.21467
GOTERM_BP_DIRECT	regulation of apoptotic process	42	0.0065	2.18709
GOTERM_BP_DIRECT	extracellular matrix organization	27	0.0068	2.16749
GOTERM_BP_DIRECT	response to insulin	29	0.0072	2.14267
GOTERM_BP_DIRECT	G2 DNA damage checkpoint	9	0.0074	2.13077
GOTERM_BP_DIRECT	cellular response to cadmium ion	9	0.0074	2.13077
GOTERM_BP_DIRECT	triglyceride biosynthetic process	7	0.0075	2.12494
GOTERM_BP_DIRECT	negative regulation of fatty acid biosynthetic process	7	0.0075	2.12494
GOTERM_BP_DIRECT	maternal process involved in parturition	7	0.0075	2.12494
GOTERM_BP_DIRECT	response to fructose	7	0.0075	2.12494
GOTERM_BP_DIRECT	response to fatty acid	14	0.0076	2.11919
GOTERM_BP_DIRECT	protein heterotetramerization	14	0.0076	2.11919
GOTERM_BP_DIRECT	cell migration	47	0.0078	2.10791
GOTERM_BP_DIRECT	response to steroid hormone	19	0.0079	2.10237
GOTERM_BP_DIRECT	cellular response to follicle-stimulating hormone stimulus	11	0.0082	2.08619
GOTERM_BP_DIRECT	cellular response to glucose stimulus	25	0.0083	2.08092
GOTERM_BP_DIRECT	cell cycle arrest	22	0.0084	2.07572
GOTERM_BP_DIRECT	cellular response to lead ion	5	0.0084	2.07572
GOTERM_BP_DIRECT	chylomicron remnant clearance	5	0.0084	2.07572
GOTERM_BP_DIRECT	9-cis-retinoic acid biosynthetic process	5	0.0084	2.07572
GOTERM_BP_DIRECT	positive regulation of beta-amyloid formation	5	0.0084	2.07572
GOTERM_BP_DIRECT	cellular response to cycloheximide	5	0.0084	2.07572
GOTERM_BP_DIRECT	smooth muscle cell proliferation	5	0.0084	2.07572
GOTERM_BP_DIRECT	negative regulation of sequestering of triglyceride	5	0.0084	2.07572
GOTERM_BP_DIRECT	regulation of endothelial cell differentiation	5	0.0084	2.07572
GOTERM_BP_DIRECT	metaphase plate congression	6	0.0085	2.07058
GOTERM_BP_DIRECT	negative regulation of angiogenesis	20	0.0086	2.0655
GOTERM_BP_DIRECT	negative regulation of MAP kinase activity	15	0.009	2.04576
GOTERM_BP_DIRECT	DNA recombination	15	0.009	2.04576
GOTERM_BP_DIRECT	DNA-dependent DNA replication	8	0.0095	2.02228
GOTERM_BP_DIRECT	positive regulation of cardiac muscle cell apoptotic process	8	0.0095	2.02228
GOTERM_BP_DIRECT	response to stilbenoid	8	0.0095	2.02228
GOTERM_BP_DIRECT	inner cell mass cell proliferation	8	0.0095	2.02228
GOTERM_BP_DIRECT	white fat cell differentiation	8	0.0095	2.02228
GOTERM_BP_DIRECT	fatty acid oxidation	8	0.0095	2.02228
GOTERM_BP_DIRECT	response to amino acid	18	0.01	2
GOTERM_BP_DIRECT	single organismal cell-cell adhesion	28	0.01	2
GOTERM_BP_DIRECT	positive regulation of reactive oxygen species metabolic process	12	0.011	1.95861
GOTERM_BP_DIRECT	estrous cycle	12	0.011	1.95861
GOTERM_BP_DIRECT	one-carbon metabolic process	11	0.011	1.95861
GOTERM_BP_DIRECT	cell-cell adhesion	49	0.011	1.95861
GOTERM_BP_DIRECT	activation of protein kinase activity	15	0.011	1.95861
GOTERM_BP_DIRECT	positive regulation of cell death	17	0.011	1.95861
GOTERM_BP_DIRECT	positive regulation of transcription from RNA polymerase II promoter	197	0.012	1.92082
GOTERM_BP_DIRECT	wound healing, spreading of cells	7	0.012	1.92082
GOTERM_BP_DIRECT	microtubule depolymerization	7	0.012	1.92082
GOTERM_BP_DIRECT	response to vitamin A	14	0.012	1.92082
GOTERM_BP_DIRECT	response to estrogen	29	0.012	1.92082
GOTERM_BP_DIRECT	response to hydrogen peroxide	22	0.013	1.88606
GOTERM_BP_DIRECT	activation of MAPK activity	22	0.013	1.88606
GOTERM_BP_DIRECT	regulation of GTPase activity	19	0.013	1.88606
GOTERM_BP_DIRECT	positive regulation of phosphatidylinositol 3-kinase signaling	19	0.013	1.88606
GOTERM_BP_DIRECT	cholesterol homeostasis	19	0.013	1.88606
GOTERM_BP_DIRECT	protein dephosphorylation	29	0.014	1.85387
GOTERM_BP_DIRECT	response to dexamethasone	12	0.014	1.85387
GOTERM_BP_DIRECT	intrinsic apoptotic signaling pathway in response to endoplasmic reticulum stress	12	0.014	1.85387
GOTERM_BP_DIRECT	response to gamma radiation	15	0.014	1.85387
GOTERM_BP_DIRECT	negative regulation of cell growth	31	0.014	1.85387
GOTERM_BP_DIRECT	positive regulation of p38MAPK cascade	8	0.014	1.85387
GOTERM_BP_DIRECT	androgen metabolic process	8	0.014	1.85387
GOTERM_BP_DIRECT	cellular senescence	9	0.015	1.82391
GOTERM_BP_DIRECT	response to arsenic-containing substance	9	0.015	1.82391
GOTERM_BP_DIRECT	replication fork processing	10	0.015	1.82391
GOTERM_BP_DIRECT	viral entry into host cell	10	0.015	1.82391
GOTERM_BP_DIRECT	progesterone metabolic process	6	0.015	1.82391
GOTERM_BP_DIRECT	replicative senescence	6	0.015	1.82391
GOTERM_BP_DIRECT	negative regulation of glial cell proliferation	6	0.015	1.82391
GOTERM_BP_DIRECT	pyruvate metabolic process	6	0.015	1.82391
GOTERM_BP_DIRECT	ventricular cardiac muscle cell development	6	0.015	1.82391
GOTERM_BP_DIRECT	negative regulation of endopeptidase activity	36	0.015	1.82391
GOTERM_BP_DIRECT	negative regulation of mitochondrial membrane permeability involved in apoptotic process	4	0.016	1.79588
GOTERM_BP_DIRECT	calcium ion export	4	0.016	1.79588
GOTERM_BP_DIRECT	ferric iron import into cell	4	0.016	1.79588
GOTERM_BP_DIRECT	circadian regulation of translation	4	0.016	1.79588
GOTERM_BP_DIRECT	negative regulation of centriole replication	4	0.016	1.79588
GOTERM_BP_DIRECT	mitotic metaphase plate congression	13	0.016	1.79588
GOTERM_BP_DIRECT	acute-phase response	13	0.016	1.79588
GOTERM_BP_DIRECT	negative regulation of sequence-specific DNA binding transcription factor activity	20	0.016	1.79588
GOTERM_BP_DIRECT	spleen development	15	0.017	1.76955
GOTERM_BP_DIRECT	response to ischemia	15	0.017	1.76955
GOTERM_BP_DIRECT	regulation of nucleocytoplasmic transport	5	0.017	1.76955
GOTERM_BP_DIRECT	negative regulation of cell division	5	0.017	1.76955
GOTERM_BP_DIRECT	ribosomal large subunit export from nucleus	5	0.017	1.76955
GOTERM_BP_DIRECT	positive regulation of cholesterol biosynthetic process	5	0.017	1.76955
GOTERM_BP_DIRECT	positive regulation of gamma-delta T cell differentiation	5	0.017	1.76955
GOTERM_BP_DIRECT	regulation of lipid metabolic process	12	0.017	1.76955
GOTERM_BP_DIRECT	glycogen metabolic process	12	0.017	1.76955
GOTERM_BP_DIRECT	generation of precursor metabolites and energy	7	0.018	1.74473
GOTERM_BP_DIRECT	cellular response to arsenic-containing substance	7	0.018	1.74473
GOTERM_BP_DIRECT	regulation of double-strand break repair via homologous recombination	7	0.018	1.74473
GOTERM_BP_DIRECT	heparan sulfate proteoglycan biosynthetic process	7	0.018	1.74473
GOTERM_BP_DIRECT	negative regulation of I-kappaB kinase/NF-kappaB signaling	14	0.018	1.74473
GOTERM_BP_DIRECT	positive regulation of neuron death	11	0.018	1.74473
GOTERM_BP_DIRECT	positive regulation of osteoblast differentiation	19	0.018	1.74473
GOTERM_BP_DIRECT	glucose transport	10	0.019	1.72125
GOTERM_BP_DIRECT	oxygen transport	8	0.019	1.72125
GOTERM_BP_DIRECT	regulation of peptidyl-tyrosine phosphorylation	8	0.019	1.72125
GOTERM_BP_DIRECT	response to gonadotropin	8	0.019	1.72125
GOTERM_BP_DIRECT	DNA methylation	9	0.02	1.69897
GOTERM_BP_DIRECT	sodium-independent organic anion transport	9	0.02	1.69897
GOTERM_BP_DIRECT	regulation of proteolysis	9	0.02	1.69897
GOTERM_BP_DIRECT	response to retinoic acid	21	0.02	1.69897
GOTERM_BP_DIRECT	peptidyl-tyrosine dephosphorylation	26	0.021	1.67778
GOTERM_BP_DIRECT	response to starvation	16	0.021	1.67778
GOTERM_BP_DIRECT	tissue regeneration	12	0.021	1.67778
GOTERM_BP_DIRECT	response to light stimulus	12	0.021	1.67778
GOTERM_BP_DIRECT	response to inorganic substance	12	0.021	1.67778
GOTERM_BP_DIRECT	adrenal gland development	12	0.021	1.67778
GOTERM_BP_DIRECT	blood vessel remodeling	14	0.022	1.65758
GOTERM_BP_DIRECT	cellular response to cytokine stimulus	14	0.022	1.65758
GOTERM_BP_DIRECT	palate development	22	0.023	1.63827
GOTERM_BP_DIRECT	cellular response to growth factor stimulus	22	0.023	1.63827
GOTERM_BP_DIRECT	cytokinesis	11	0.023	1.63827
GOTERM_BP_DIRECT	extrinsic apoptotic signaling pathway via death domain receptors	11	0.023	1.63827
GOTERM_BP_DIRECT	nuclear pore complex assembly	6	0.023	1.63827
GOTERM_BP_DIRECT	multicellular organismal iron ion homeostasis	6	0.023	1.63827
GOTERM_BP_DIRECT	bile acid biosynthetic process	6	0.023	1.63827
GOTERM_BP_DIRECT	positive regulation of protein secretion	13	0.024	1.61979
GOTERM_BP_DIRECT	collagen fibril organization	13	0.024	1.61979
GOTERM_BP_DIRECT	tumor necrosis factor-mediated signaling pathway	13	0.024	1.61979
GOTERM_BP_DIRECT	lipoprotein metabolic process	10	0.025	1.60206
GOTERM_BP_DIRECT	regulation of transcription from RNA polymerase II promoter	90	0.025	1.60206
GOTERM_BP_DIRECT	focal adhesion assembly	9	0.026	1.58503
GOTERM_BP_DIRECT	cellular response to vascular endothelial growth factor stimulus	9	0.026	1.58503
GOTERM_BP_DIRECT	lipid biosynthetic process	7	0.026	1.58503
GOTERM_BP_DIRECT	ruffle organization	7	0.026	1.58503
GOTERM_BP_DIRECT	adipose tissue development	12	0.026	1.58503
GOTERM_BP_DIRECT	antigen processing and presentation of peptide antigen via MHC class I	12	0.026	1.58503
GOTERM_BP_DIRECT	positive regulation of nitric-oxide synthase biosynthetic process	8	0.027	1.56864
GOTERM_BP_DIRECT	negative regulation of DNA replication	8	0.027	1.56864
GOTERM_BP_DIRECT	mammary gland alveolus development	8	0.027	1.56864
GOTERM_BP_DIRECT	nucleic acid phosphodiester bond hydrolysis	18	0.028	1.55284
GOTERM_BP_DIRECT	response to zinc ion	15	0.028	1.55284
GOTERM_BP_DIRECT	cellular oxidant detoxification	19	0.028	1.55284
GOTERM_BP_DIRECT	steroid biosynthetic process	11	0.029	1.5376
GOTERM_BP_DIRECT	positive regulation of axon extension	13	0.029	1.5376
GOTERM_BP_DIRECT	platelet aggregation	13	0.029	1.5376
GOTERM_BP_DIRECT	mammary gland development	13	0.029	1.5376
GOTERM_BP_DIRECT	hemopoiesis	21	0.029	1.5376
GOTERM_BP_DIRECT	actin filament capping	5	0.03	1.52288
GOTERM_BP_DIRECT	attachment of mitotic spindle microtubules to kinetochore	5	0.03	1.52288
GOTERM_BP_DIRECT	embryonic neurocranium morphogenesis	5	0.03	1.52288
GOTERM_BP_DIRECT	chromatin assembly	5	0.03	1.52288
GOTERM_BP_DIRECT	negative regulation of heterotypic cell-cell adhesion	5	0.03	1.52288
GOTERM_BP_DIRECT	positive regulation of integrin-mediated signaling pathway	5	0.03	1.52288
GOTERM_BP_DIRECT	androgen biosynthetic process	5	0.03	1.52288
GOTERM_BP_DIRECT	response to redox state	5	0.03	1.52288
GOTERM_BP_DIRECT	pyrimidine nucleobase metabolic process	5	0.03	1.52288
GOTERM_BP_DIRECT	positive regulation of cholesterol esterification	5	0.03	1.52288
GOTERM_BP_DIRECT	astral microtubule organization	5	0.03	1.52288
GOTERM_BP_DIRECT	positive regulation of MAP kinase activity	16	0.03	1.52288
GOTERM_BP_DIRECT	negative regulation of intrinsic apoptotic signaling pathway	10	0.031	1.50864
GOTERM_BP_DIRECT	positive regulation of endothelial cell proliferation	19	0.032	1.49485
GOTERM_BP_DIRECT	rRNA processing	19	0.032	1.49485
GOTERM_BP_DIRECT	blood vessel development	19	0.032	1.49485
GOTERM_BP_DIRECT	regulation of glucose metabolic process	9	0.033	1.48149
GOTERM_BP_DIRECT	response to oxidative stress	34	0.033	1.48149
GOTERM_BP_DIRECT	positive regulation of cell growth	22	0.034	1.46852
GOTERM_BP_DIRECT	monoterpenoid metabolic process	4	0.034	1.46852
GOTERM_BP_DIRECT	negative regulation of transcription from RNA polymerase II promoter in response to endoplasmic reticulum stress	4	0.034	1.46852
GOTERM_BP_DIRECT	drug catabolic process	4	0.034	1.46852
GOTERM_BP_DIRECT	nucleolus organization	4	0.034	1.46852
GOTERM_BP_DIRECT	response to nitrosative stress	4	0.034	1.46852
GOTERM_BP_DIRECT	transformation of host cell by virus	4	0.034	1.46852
GOTERM_BP_DIRECT	cellular response to growth hormone stimulus	4	0.034	1.46852
GOTERM_BP_DIRECT	heterocycle metabolic process	4	0.034	1.46852
GOTERM_BP_DIRECT	homologous chromosome segregation	4	0.034	1.46852
GOTERM_BP_DIRECT	organic acid transmembrane transport	4	0.034	1.46852
GOTERM_BP_DIRECT	cell cycle phase transition	4	0.034	1.46852
GOTERM_BP_DIRECT	high-density lipoprotein particle clearance	4	0.034	1.46852
GOTERM_BP_DIRECT	meiotic chromosome segregation	4	0.034	1.46852
GOTERM_BP_DIRECT	double-strand break repair via break-induced replication	4	0.034	1.46852
GOTERM_BP_DIRECT	high-density lipoprotein particle remodeling	6	0.035	1.45593
GOTERM_BP_DIRECT	long-chain fatty acid transport	6	0.035	1.45593
GOTERM_BP_DIRECT	positive regulation of fatty acid biosynthetic process	6	0.035	1.45593
GOTERM_BP_DIRECT	regulation of sequence-specific DNA binding transcription factor activity	6	0.035	1.45593
GOTERM_BP_DIRECT	semaphorin-plexin signaling pathway involved in axon guidance	6	0.035	1.45593
GOTERM_BP_DIRECT	glial cell migration	6	0.035	1.45593
GOTERM_BP_DIRECT	lipid homeostasis	13	0.035	1.45593
GOTERM_BP_DIRECT	receptor internalization	13	0.035	1.45593
GOTERM_BP_DIRECT	protein heterotrimerization	8	0.035	1.45593
GOTERM_BP_DIRECT	positive regulation of cytokinesis	11	0.035	1.45593
GOTERM_BP_DIRECT	cellular response to interferon-gamma	17	0.036	1.4437
GOTERM_BP_DIRECT	mitotic spindle assembly checkpoint	7	0.036	1.4437
GOTERM_BP_DIRECT	negative regulation of peptidyl-tyrosine phosphorylation	7	0.036	1.4437
GOTERM_BP_DIRECT	cellular response to thyroid hormone stimulus	7	0.036	1.4437
GOTERM_BP_DIRECT	response to radiation	15	0.039	1.40894
GOTERM_BP_DIRECT	regulation of mitotic cell cycle	12	0.039	1.40894
GOTERM_BP_DIRECT	response to metal ion	10	0.039	1.40894
GOTERM_BP_DIRECT	establishment of protein localization to plasma membrane	13	0.041	1.38722
GOTERM_BP_DIRECT	MAPK cascade	24	0.042	1.37675
GOTERM_BP_DIRECT	positive regulation of myoblast differentiation	9	0.042	1.37675
GOTERM_BP_DIRECT	chromatin organization	9	0.042	1.37675
GOTERM_BP_DIRECT	epoxygenase P450 pathway	9	0.042	1.37675
GOTERM_BP_DIRECT	integrin-mediated signaling pathway	22	0.042	1.37675
GOTERM_BP_DIRECT	negative regulation of fibroblast proliferation	11	0.043	1.36653
GOTERM_BP_DIRECT	brown fat cell differentiation	11	0.043	1.36653
GOTERM_BP_DIRECT	response to axon injury	14	0.043	1.36653
GOTERM_BP_DIRECT	protein ubiquitination	71	0.044	1.35655
GOTERM_BP_DIRECT	isoprenoid biosynthetic process	8	0.045	1.34679
GOTERM_BP_DIRECT	negative regulation of viral entry into host cell	8	0.045	1.34679
GOTERM_BP_DIRECT	transport	35	0.046	1.33724
GOTERM_BP_DIRECT	regulation of mitotic metaphase/anaphase transition	5	0.046	1.33724
GOTERM_BP_DIRECT	myoblast migration	5	0.046	1.33724
GOTERM_BP_DIRECT	regulation of protein heterodimerization activity	5	0.046	1.33724
GOTERM_BP_DIRECT	regulation of cholesterol metabolic process	5	0.046	1.33724
GOTERM_BP_DIRECT	Peyer's patch development	5	0.046	1.33724
GOTERM_BP_DIRECT	toxin metabolic process	5	0.046	1.33724
GOTERM_BP_DIRECT	thyroid hormone transport	5	0.046	1.33724
GOTERM_BP_DIRECT	endothelial cell chemotaxis	5	0.046	1.33724
GOTERM_BP_DIRECT	regulation of response to DNA damage stimulus	5	0.046	1.33724
GOTERM_BP_DIRECT	cholesterol catabolic process	5	0.046	1.33724
GOTERM_BP_DIRECT	ossification	24	0.046	1.33724
GOTERM_BP_DIRECT	cartilage development	18	0.047	1.3279
GOTERM_BP_DIRECT	protein oligomerization	18	0.047	1.3279
GOTERM_BP_DIRECT	negative regulation of catalytic activity	18	0.047	1.3279
GOTERM_BP_DIRECT	actin filament organization	20	0.047	1.3279
GOTERM_BP_DIRECT	negative regulation of interleukin-6 production	10	0.048	1.31876
GOTERM_BP_DIRECT	negative regulation of viral genome replication	10	0.048	1.31876
GOTERM_BP_DIRECT	rhythmic process	10	0.048	1.31876
GOTERM_BP_DIRECT	negative regulation of endothelial cell apoptotic process	10	0.048	1.31876
GOTERM_BP_DIRECT	positive regulation of triglyceride biosynthetic process	7	0.048	1.31876
GOTERM_BP_DIRECT	negative regulation of smooth muscle cell migration	7	0.048	1.31876
GOTERM_BP_DIRECT	selenium compound metabolic process	6	0.049	1.3098
GOTERM_BP_DIRECT	linoleic acid metabolic process	6	0.049	1.3098
GOTERM_BP_DIRECT	fatty acid homeostasis	6	0.049	1.3098
GOTERM_BP_DIRECT	nuclear-transcribed mRNA poly(A) tail shortening	6	0.049	1.3098
GOTERM_BP_DIRECT	response to leptin	6	0.049	1.3098
GOTERM_BP_DIRECT	fatty acid catabolic process	6	0.049	1.3098
GOTERM_BP_DIRECT	postreplication repair	6	0.049	1.3098
GOTERM_BP_DIRECT	sterol biosynthetic process	6	0.049	1.3098
GOTERM_BP_DIRECT	negative regulation of pri-miRNA transcription from RNA polymerase II promoter	6	0.049	1.3098
GOTERM_BP_DIRECT	positive regulation of cell growth involved in cardiac muscle cell development	6	0.049	1.3098
GOTERM_BP_DIRECT	negative regulation of DNA biosynthetic process	6	0.049	1.3098
GOTERM_CC_DIRECT	cytoplasm	1120	1.6e-33	32.7959
GOTERM_CC_DIRECT	nucleus	1033	2.2e-29	28.6576
GOTERM_CC_DIRECT	nucleoplasm	429	5.4e-22	21.2676
GOTERM_CC_DIRECT	nucleolus	215	7.4e-15	14.1308
GOTERM_CC_DIRECT	cytosol	366	8.6e-14	13.0655
GOTERM_CC_DIRECT	extracellular exosome	555	1.1e-12	11.9586
GOTERM_CC_DIRECT	chromosome, centromeric region	28	3e-12	11.5229
GOTERM_CC_DIRECT	extracellular matrix	85	1.8e-11	10.7447
GOTERM_CC_DIRECT	intracellular membrane-bounded organelle	177	7.2e-11	10.1427
GOTERM_CC_DIRECT	kinetochore	39	8.4e-11	10.0757
GOTERM_CC_DIRECT	nuclear chromatin	74	9.5e-11	10.0223
GOTERM_CC_DIRECT	membrane	449	1.5e-08	7.82391
GOTERM_CC_DIRECT	centrosome	115	8e-08	7.09691
GOTERM_CC_DIRECT	nucleosome	36	9e-08	7.04576
GOTERM_CC_DIRECT	proteinaceous extracellular matrix	74	2.3e-07	6.63827
GOTERM_CC_DIRECT	chromatin	44	3.3e-07	6.48149
GOTERM_CC_DIRECT	spindle	37	3.4e-07	6.46852
GOTERM_CC_DIRECT	condensed chromosome kinetochore	21	4.1e-07	6.38722
GOTERM_CC_DIRECT	focal adhesion	103	5.1e-07	6.29243
GOTERM_CC_DIRECT	nuclear chromosome, telomeric region	41	7.7e-07	6.11351
GOTERM_CC_DIRECT	perinuclear region of cytoplasm	151	8.7e-07	6.06048
GOTERM_CC_DIRECT	brush border	30	1.6e-06	5.79588
GOTERM_CC_DIRECT	organelle membrane	34	1.8e-06	5.74473
GOTERM_CC_DIRECT	replication fork	14	2.8e-06	5.55284
GOTERM_CC_DIRECT	protein complex	140	9.6e-06	5.01773
GOTERM_CC_DIRECT	chromosome	29	9.8e-06	5.00877
GOTERM_CC_DIRECT	cell-cell adherens junction	70	1e-05	5
GOTERM_CC_DIRECT	midbody	39	1.2e-05	4.92082
GOTERM_CC_DIRECT	spindle pole	33	2e-05	4.69897
GOTERM_CC_DIRECT	PML body	30	2.9e-05	4.5376
GOTERM_CC_DIRECT	basement membrane	32	3.4e-05	4.46852
GOTERM_CC_DIRECT	endoplasmic reticulum membrane	125	7.2e-05	4.14267
GOTERM_CC_DIRECT	MCM complex	8	7.5e-05	4.12494
GOTERM_CC_DIRECT	cytoskeleton	63	8.6e-05	4.0655
GOTERM_CC_DIRECT	condensed chromosome, centromeric region	7	0.00011	3.95861
GOTERM_CC_DIRECT	mitochondrion	313	0.00011	3.95861
GOTERM_CC_DIRECT	nuclear matrix	30	0.00012	3.92082
GOTERM_CC_DIRECT	cleavage furrow	17	0.00013	3.88606
GOTERM_CC_DIRECT	extracellular space	261	0.00017	3.76955
GOTERM_CC_DIRECT	actin filament	25	0.00032	3.49485
GOTERM_CC_DIRECT	endoplasmic reticulum	170	0.00033	3.48149
GOTERM_CC_DIRECT	nuclear nucleosome	12	0.00039	3.40894
GOTERM_CC_DIRECT	cell surface	131	0.00044	3.35655
GOTERM_CC_DIRECT	kinesin complex	19	0.00087	3.06048
GOTERM_CC_DIRECT	condensed chromosome outer kinetochore	7	0.00095	3.02228
GOTERM_CC_DIRECT	lipid particle	22	0.00095	3.02228
GOTERM_CC_DIRECT	condensed chromosome	14	0.0011	2.95861
GOTERM_CC_DIRECT	spindle microtubule	16	0.0012	2.92082
GOTERM_CC_DIRECT	spindle midzone	10	0.0014	2.85387
GOTERM_CC_DIRECT	apical plasma membrane	72	0.0015	2.82391
GOTERM_CC_DIRECT	cell cortex	35	0.0015	2.82391
GOTERM_CC_DIRECT	microtubule	57	0.0015	2.82391
GOTERM_CC_DIRECT	condensed nuclear chromosome kinetochore	6	0.0017	2.76955
GOTERM_CC_DIRECT	basolateral plasma membrane	51	0.0018	2.74473
GOTERM_CC_DIRECT	nuclear heterochromatin	12	0.002	2.69897
GOTERM_CC_DIRECT	stress fiber	22	0.0022	2.65758
GOTERM_CC_DIRECT	costamere	10	0.0022	2.65758
GOTERM_CC_DIRECT	XY body	10	0.0022	2.65758
GOTERM_CC_DIRECT	cell-cell junction	47	0.0023	2.63827
GOTERM_CC_DIRECT	neuronal cell body	113	0.0024	2.61979
GOTERM_CC_DIRECT	lamellipodium	40	0.0025	2.60206
GOTERM_CC_DIRECT	actin cytoskeleton	47	0.0025	2.60206
GOTERM_CC_DIRECT	mitotic spindle	16	0.0027	2.56864
GOTERM_CC_DIRECT	peroxisome	33	0.0029	2.5376
GOTERM_CC_DIRECT	condensin complex	5	0.0029	2.5376
GOTERM_CC_DIRECT	cell projection	27	0.0044	2.35655
GOTERM_CC_DIRECT	microtubule organizing center	31	0.0049	2.3098
GOTERM_CC_DIRECT	centriole	28	0.0052	2.284
GOTERM_CC_DIRECT	cortical cytoskeleton	12	0.0052	2.284
GOTERM_CC_DIRECT	hemoglobin complex	8	0.0055	2.25964
GOTERM_CC_DIRECT	nuclear euchromatin	12	0.0069	2.16115
GOTERM_CC_DIRECT	transcription factor complex	52	0.0076	2.11919
GOTERM_CC_DIRECT	dendritic growth cone	5	0.0077	2.11351
GOTERM_CC_DIRECT	semaphorin receptor complex	6	0.0078	2.10791
GOTERM_CC_DIRECT	mitotic spindle midzone	6	0.0078	2.10791
GOTERM_CC_DIRECT	neuron projection	82	0.011	1.95861
GOTERM_CC_DIRECT	ruffle	24	0.011	1.95861
GOTERM_CC_DIRECT	very-low-density lipoprotein particle	8	0.012	1.92082
GOTERM_CC_DIRECT	low-density lipoprotein particle	6	0.013	1.88606
GOTERM_CC_DIRECT	nuclear chromosome	13	0.014	1.85387
GOTERM_CC_DIRECT	mitochondrial outer membrane	30	0.015	1.82391
GOTERM_CC_DIRECT	MIS12/MIND type complex	4	0.015	1.82391
GOTERM_CC_DIRECT	condensed nuclear chromosome outer kinetochore	4	0.015	1.82391
GOTERM_CC_DIRECT	Ndc80 complex	4	0.015	1.82391
GOTERM_CC_DIRECT	Ctf18 RFC-like complex	5	0.016	1.79588
GOTERM_CC_DIRECT	small-subunit processome	13	0.017	1.76955
GOTERM_CC_DIRECT	nuclear envelope	35	0.017	1.76955
GOTERM_CC_DIRECT	condensed nuclear chromosome, centromeric region	8	0.017	1.76955
GOTERM_CC_DIRECT	endocytic vesicle	16	0.021	1.67778
GOTERM_CC_DIRECT	small nucleolar ribonucleoprotein complex	6	0.021	1.67778
GOTERM_CC_DIRECT	chylomicron	6	0.021	1.67778
GOTERM_CC_DIRECT	actomyosin	6	0.021	1.67778
GOTERM_CC_DIRECT	chromocenter	7	0.024	1.61979
GOTERM_CC_DIRECT	extracellular vesicle	15	0.024	1.61979
GOTERM_CC_DIRECT	microtubule plus-end	8	0.024	1.61979
GOTERM_CC_DIRECT	melanosome	23	0.027	1.56864
GOTERM_CC_DIRECT	MLL5-L complex	5	0.027	1.56864
GOTERM_CC_DIRECT	extrinsic component of external side of plasma membrane	5	0.027	1.56864
GOTERM_CC_DIRECT	chromosome, telomeric region	12	0.028	1.55284
GOTERM_CC_DIRECT	intracellular	187	0.03	1.52288
GOTERM_CC_DIRECT	spindle pole centrosome	6	0.032	1.49485
GOTERM_CC_DIRECT	alpha DNA polymerase:primase complex	4	0.032	1.49485
GOTERM_CC_DIRECT	bleb	4	0.032	1.49485
GOTERM_CC_DIRECT	chromosome passenger complex	4	0.032	1.49485
GOTERM_CC_DIRECT	cytoplasmic microtubule	15	0.033	1.48149
GOTERM_CC_DIRECT	blood microparticle	28	0.035	1.45593
GOTERM_CC_DIRECT	condensed nuclear chromosome	13	0.036	1.4437
GOTERM_CC_DIRECT	integral component of endoplasmic reticulum membrane	22	0.039	1.40894
GOTERM_CC_DIRECT	cytoplasmic mRNA processing body	18	0.039	1.40894
GOTERM_CC_DIRECT	microtubule cytoskeleton	35	0.041	1.38722
GOTERM_CC_DIRECT	endosome	52	0.043	1.36653
GOTERM_CC_DIRECT	nuclear pericentric heterochromatin	5	0.043	1.36653
GOTERM_CC_DIRECT	cytoplasmic vesicle	57	0.043	1.36653
GOTERM_CC_DIRECT	high-density lipoprotein particle	7	0.044	1.35655
GOTERM_CC_DIRECT	apical part of cell	28	0.046	1.33724
GOTERM_CC_DIRECT	mitochondrial matrix	35	0.049	1.3098
GOTERM_MF_DIRECT	ATP binding	343	6.2e-16	15.2076
GOTERM_MF_DIRECT	DNA binding	261	8.3e-12	11.0809
GOTERM_MF_DIRECT	protein binding	351	4.7e-10	9.3279
GOTERM_MF_DIRECT	kinase activity	57	1.4e-09	8.85387
GOTERM_MF_DIRECT	protein kinase binding	120	5.6e-09	8.25181
GOTERM_MF_DIRECT	protein heterodimerization activity	139	1.6e-07	6.79588
GOTERM_MF_DIRECT	receptor binding	95	1.7e-06	5.76955
GOTERM_MF_DIRECT	protein homodimerization activity	182	2.7e-06	5.56864
GOTERM_MF_DIRECT	enzyme binding	100	2.8e-06	5.55284
GOTERM_MF_DIRECT	transcription factor binding	86	3.4e-06	5.46852
GOTERM_MF_DIRECT	integrin binding	36	4.5e-06	5.34679
GOTERM_MF_DIRECT	chromatin binding	111	5.9e-06	5.22915
GOTERM_MF_DIRECT	extracellular matrix structural constituent	21	1.3e-05	4.88606
GOTERM_MF_DIRECT	protein kinase activity	74	1.7e-05	4.76955
GOTERM_MF_DIRECT	histone binding	38	2.7e-05	4.56864
GOTERM_MF_DIRECT	protein serine/threonine kinase activity	81	2.9e-05	4.5376
GOTERM_MF_DIRECT	poly(A) RNA binding	236	4.2e-05	4.37675
GOTERM_MF_DIRECT	protein phosphatase binding	31	4.8e-05	4.31876
GOTERM_MF_DIRECT	identical protein binding	145	4.8e-05	4.31876
GOTERM_MF_DIRECT	monooxygenase activity	25	5.2e-05	4.284
GOTERM_MF_DIRECT	iron ion binding	56	6.4e-05	4.19382
GOTERM_MF_DIRECT	heme binding	48	7.6e-05	4.11919
GOTERM_MF_DIRECT	single-stranded DNA binding	30	8e-05	4.09691
GOTERM_MF_DIRECT	protein domain specific binding	77	0.00013	3.88606
GOTERM_MF_DIRECT	single-stranded DNA-dependent ATPase activity	9	0.00014	3.85387
GOTERM_MF_DIRECT	aromatase activity	17	0.00022	3.65758
GOTERM_MF_DIRECT	oxidoreductase activity	38	0.00023	3.63827
GOTERM_MF_DIRECT	ubiquitin protein ligase binding	72	0.00033	3.48149
GOTERM_MF_DIRECT	core promoter sequence-specific DNA binding	18	0.00034	3.46852
GOTERM_MF_DIRECT	steroid hormone receptor activity	21	0.00036	3.4437
GOTERM_MF_DIRECT	microtubule binding	55	0.00036	3.4437
GOTERM_MF_DIRECT	oxidoreductase activity, acting on paired donors, with incorporation or reduction of molecular oxygen, reduced flavin or flavoprotein as one donor, and incorporation of one atom of oxygen	15	0.00052	3.284
GOTERM_MF_DIRECT	arachidonic acid epoxygenase activity	15	0.00052	3.284
GOTERM_MF_DIRECT	transporter activity	37	0.00067	3.17393
GOTERM_MF_DIRECT	cadherin binding involved in cell-cell adhesion	56	0.00067	3.17393
GOTERM_MF_DIRECT	DNA-directed DNA polymerase activity	12	0.0007	3.1549
GOTERM_MF_DIRECT	steroid hydroxylase activity	16	0.00079	3.10237
GOTERM_MF_DIRECT	organic anion transmembrane transporter activity	10	0.001	3
GOTERM_MF_DIRECT	zinc ion binding	210	0.0013	2.88606
GOTERM_MF_DIRECT	magnesium ion binding	53	0.0013	2.88606
GOTERM_MF_DIRECT	ATPase activity	46	0.0015	2.82391
GOTERM_MF_DIRECT	low-density lipoprotein particle binding	9	0.0019	2.72125
GOTERM_MF_DIRECT	heparin binding	39	0.002	2.69897
GOTERM_MF_DIRECT	protein complex binding	83	0.002	2.69897
GOTERM_MF_DIRECT	bile acid transmembrane transporter activity	7	0.0022	2.65758
GOTERM_MF_DIRECT	GTPase activator activity	51	0.0025	2.60206
GOTERM_MF_DIRECT	RNA polymerase II transcription factor activity, ligand-activated sequence-specific DNA binding	14	0.0025	2.60206
GOTERM_MF_DIRECT	double-stranded DNA binding	35	0.003	2.52288
GOTERM_MF_DIRECT	thyroid hormone receptor activity	5	0.0031	2.50864
GOTERM_MF_DIRECT	protease binding	33	0.0038	2.42022
GOTERM_MF_DIRECT	pyridoxal phosphate binding	19	0.0042	2.37675
GOTERM_MF_DIRECT	platelet-derived growth factor binding	7	0.0042	2.37675
GOTERM_MF_DIRECT	structural constituent of cytoskeleton	22	0.0047	2.3279
GOTERM_MF_DIRECT	ADP binding	14	0.0057	2.24413
GOTERM_MF_DIRECT	N-acetyltransferase activity	11	0.0058	2.23657
GOTERM_MF_DIRECT	E-box binding	13	0.0059	2.22915
GOTERM_MF_DIRECT	extracellular matrix binding	11	0.0079	2.10237
GOTERM_MF_DIRECT	lipase inhibitor activity	5	0.0082	2.08619
GOTERM_MF_DIRECT	annealing helicase activity	6	0.0083	2.08092
GOTERM_MF_DIRECT	DNA clamp loader activity	6	0.0083	2.08092
GOTERM_MF_DIRECT	microtubule motor activity	20	0.0096	2.01773
GOTERM_MF_DIRECT	kinase binding	25	0.01	2
GOTERM_MF_DIRECT	transcription factor activity, RNA polymerase II core promoter proximal region sequence-specific binding	11	0.011	1.95861
GOTERM_MF_DIRECT	structural constituent of muscle	10	0.011	1.95861
GOTERM_MF_DIRECT	peptide antigen binding	13	0.012	1.92082
GOTERM_MF_DIRECT	calmodulin binding	38	0.013	1.88606
GOTERM_MF_DIRECT	histone deacetylase binding	29	0.013	1.88606
GOTERM_MF_DIRECT	phosphatase activity	12	0.013	1.88606
GOTERM_MF_DIRECT	cofactor binding	8	0.013	1.88606
GOTERM_MF_DIRECT	ligase activity	30	0.014	1.85387
GOTERM_MF_DIRECT	calcium-transporting ATPase activity	6	0.014	1.85387
GOTERM_MF_DIRECT	nucleotide binding	69	0.015	1.82391
GOTERM_MF_DIRECT	chromatin DNA binding	19	0.015	1.82391
GOTERM_MF_DIRECT	cupric reductase activity	4	0.015	1.82391
GOTERM_MF_DIRECT	ferric-chelate reductase (NADPH) activity	4	0.015	1.82391
GOTERM_MF_DIRECT	AP-1 adaptor complex binding	4	0.015	1.82391
GOTERM_MF_DIRECT	kinetochore binding	4	0.015	1.82391
GOTERM_MF_DIRECT	transcription coactivator activity	42	0.016	1.79588
GOTERM_MF_DIRECT	protein C-terminus binding	48	0.017	1.76955
GOTERM_MF_DIRECT	oxygen binding	11	0.018	1.74473
GOTERM_MF_DIRECT	platelet-derived growth factor receptor binding	7	0.018	1.74473
GOTERM_MF_DIRECT	MAP kinase tyrosine/serine/threonine phosphatase activity	7	0.018	1.74473
GOTERM_MF_DIRECT	ATP-dependent microtubule motor activity, plus-end-directed	7	0.018	1.74473
GOTERM_MF_DIRECT	lysophospholipase activity	7	0.018	1.74473
GOTERM_MF_DIRECT	p53 binding	20	0.018	1.74473
GOTERM_MF_DIRECT	GTP binding	79	0.019	1.72125
GOTERM_MF_DIRECT	RNA polymerase binding	8	0.019	1.72125
GOTERM_MF_DIRECT	oxygen transporter activity	8	0.019	1.72125
GOTERM_MF_DIRECT	GTPase activity	45	0.019	1.72125
GOTERM_MF_DIRECT	protein tyrosine phosphatase activity	26	0.02	1.69897
GOTERM_MF_DIRECT	core promoter binding	18	0.023	1.63827
GOTERM_MF_DIRECT	semaphorin receptor activity	6	0.023	1.63827
GOTERM_MF_DIRECT	fatty acid binding	10	0.024	1.61979
GOTERM_MF_DIRECT	actin binding	54	0.025	1.60206
GOTERM_MF_DIRECT	promoter-specific chromatin binding	8	0.026	1.58503
GOTERM_MF_DIRECT	protein phosphatase regulator activity	8	0.026	1.58503
GOTERM_MF_DIRECT	actin filament binding	33	0.026	1.58503
GOTERM_MF_DIRECT	lipid binding	30	0.027	1.56864
GOTERM_MF_DIRECT	sodium channel regulator activity	11	0.028	1.55284
GOTERM_MF_DIRECT	low-density lipoprotein receptor activity	5	0.029	1.5376
GOTERM_MF_DIRECT	protein tyrosine kinase activity	21	0.032	1.49485
GOTERM_MF_DIRECT	transcription regulatory region DNA binding	51	0.033	1.48149
GOTERM_MF_DIRECT	vinculin binding	6	0.034	1.46852
GOTERM_MF_DIRECT	growth factor binding	11	0.034	1.46852
GOTERM_MF_DIRECT	transcriptional activator activity, RNA polymerase II core promoter proximal region sequence-specific binding	54	0.035	1.45593
GOTERM_MF_DIRECT	flavin adenine dinucleotide binding	19	0.035	1.45593
GOTERM_MF_DIRECT	oxidoreductase activity, acting on paired donors, with incorporation or reduction of molecular oxygen	14	0.036	1.4437
GOTERM_MF_DIRECT	RNA binding	92	0.037	1.4318
GOTERM_MF_DIRECT	protein phosphatase 2A binding	12	0.037	1.4318
GOTERM_MF_DIRECT	helicase activity	10	0.038	1.42022
GOTERM_MF_DIRECT	glutathione transferase activity	13	0.04	1.39794
GOTERM_MF_DIRECT	protein N-terminus binding	28	0.042	1.37675
GOTERM_MF_DIRECT	repressing transcription factor binding	11	0.042	1.37675
GOTERM_MF_DIRECT	Rho GTPase binding	11	0.042	1.37675
GOTERM_MF_DIRECT	sodium-independent organic anion transmembrane transporter activity	8	0.044	1.35655
GOTERM_MF_DIRECT	catalytic activity	23	0.044	1.35655
GOTERM_MF_DIRECT	U3 snoRNA binding	5	0.046	1.33724
GOTERM_MF_DIRECT	nucleosomal DNA binding	13	0.047	1.3279
GOTERM_MF_DIRECT	transcriptional activator activity, RNA polymerase II transcription factor binding	7	0.047	1.3279
GOTERM_MF_DIRECT	lyase activity	7	0.047	1.3279
GOTERM_MF_DIRECT	small molecule binding	7	0.047	1.3279
GOTERM_MF_DIRECT	acetylglucosaminyltransferase activity	7	0.047	1.3279

## Sheet: proliferation-related GO terms
category	GO terms	Count	P-Value	-log10(P-Value)	gene list
GOTERM_BP_DIRECT	cell division	74	7.6e-15	14.1192	ENSRNOT00000083678, ENSRNOT00000084271, ENSRNOT00000068520, ENSRNOT00000084590, ENSRNOT00000079371, ENSRNOT00000008254, ENSRNOT00000091004, ENSRNOT00000036098, ENSRNOT00000010144, ENSRNOT00000064731, ENSRNOT00000036702, ENSRNOT00000065677, ENSRNOT00000037444, ENSRNOT00000018118, ENSRNOT00000072027, ENSRNOT00000048293, ENSRNOT00000065633, ENSRNOT00000064081, ENSRNOT00000068711, ENSRNOT00000048851,…
GOTERM_BP_DIRECT	chromosome segregation	36	1e-11	11	ENSRNOT00000051783, ENSRNOT00000090646, ENSRNOT00000064316, ENSRNOT00000028109, ENSRNOT00000043387, ENSRNOT00000000612, ENSRNOT00000065721, ENSRNOT00000015651, ENSRNOT00000080498, ENSRNOT00000017314, ENSRNOT00000032723, ENSRNOT00000085344, ENSRNOT00000036098, ENSRNOT00000012454, ENSRNOT00000010144, ENSRNOT00000076451, ENSRNOT00000004525, ENSRNOT00000083340, ENSRNOT00000008837, ENSRNOT00000021320,…
GOTERM_BP_DIRECT	DNA replication	40	8.7e-11	10.0605	ENSRNOT00000027268, ENSRNOT00000003686, ENSRNOT00000091994, ENSRNOT00000028109, ENSRNOT00000055030, ENSRNOT00000028898, ENSRNOT00000028406, ENSRNOT00000074058, ENSRNOT00000019288, ENSRNOT00000031783, ENSRNOT00000022256, ENSRNOT00000018394, ENSRNOT00000084076, ENSRNOT00000012492, ENSRNOT00000075997, ENSRNOT00000057227, ENSRNOT00000024301, ENSRNOT00000016828, ENSRNOT00000027590, ENSRNOT00000012022,…
GOTERM_BP_DIRECT	mitotic nuclear division	48	1e-08	8	ENSRNOT00000083678, ENSRNOT00000020826, ENSRNOT00000084590, ENSRNOT00000022133, ENSRNOT00000036098, ENSRNOT00000010144, ENSRNOT00000036702, ENSRNOT00000065677, ENSRNOT00000037444, ENSRNOT00000065633, ENSRNOT00000030221, ENSRNOT00000047241, ENSRNOT00000081531, ENSRNOT00000086147, ENSRNOT00000078783, ENSRNOT00000082561, ENSRNOT00000013362, ENSRNOT00000079646, ENSRNOT00000090393, ENSRNOT00000056531,…
GOTERM_BP_DIRECT	mitotic sister chromatid segregation	17	5.6e-08	7.25181	ENSRNOT00000012512, ENSRNOT00000048293, ENSRNOT00000085176, ENSRNOT00000025629, ENSRNOT00000015651, ENSRNOT00000052312, ENSRNOT00000057036, ENSRNOT00000068711, ENSRNOT00000008254, ENSRNOT00000074404, ENSRNOT00000006235, ENSRNOT00000007285, ENSRNOT00000017314, ENSRNOT00000091675, ENSRNOT00000012454, ENSRNOT00000084128, ENSRNOT00000010144, ENSRNOT00000068623, ENSRNOT00000081934, ENSRNOT00000041281,…
GOTERM_BP_DIRECT	DNA replication initiation	15	9.1e-07	6.04096	ENSRNOT00000072027, ENSRNOT00000010696, ENSRNOT00000084271, ENSRNOT00000001825, ENSRNOT00000028406, ENSRNOT00000068520, ENSRNOT00000039467, ENSRNOT00000081424, ENSRNOT00000020014, ENSRNOT00000004969, ENSRNOT00000038228, ENSRNOT00000002510, ENSRNOT00000075997, ENSRNOT00000017081, ENSRNOT00000022231, ENSRNOT00000024301, ENSRNOT00000064731
GOTERM_BP_DIRECT	negative regulation of cell proliferation	97	3.4e-06	5.46852	ENSRNOT00000085635, ENSRNOT00000080695, ENSRNOT00000074389, ENSRNOT00000006246, ENSRNOT00000088355, ENSRNOT00000024917, ENSRNOT00000084171, ENSRNOT00000064275, ENSRNOT00000008719, ENSRNOT00000065529, ENSRNOT00000001379, ENSRNOT00000022065, ENSRNOT00000083779, ENSRNOT00000089893, ENSRNOT00000013516, ENSRNOT00000027411, ENSRNOT00000008898, ENSRNOT00000045488, ENSRNOT00000089417, ENSRNOT00000000628,…
GOTERM_BP_DIRECT	regulation of cell cycle	41	5.7e-06	5.24413	ENSRNOT00000032972, ENSRNOT00000085115, ENSRNOT00000061157, ENSRNOT00000064785, ENSRNOT00000029865, ENSRNOT00000050555, ENSRNOT00000078159, ENSRNOT00000046313, ENSRNOT00000006389, ENSRNOT00000057036, ENSRNOT00000091731, ENSRNOT00000007698, ENSRNOT00000064824, ENSRNOT00000022256, ENSRNOT00000020014, ENSRNOT00000050038, ENSRNOT00000018252, ENSRNOT00000007583, ENSRNOT00000026760, ENSRNOT00000038296,…
GOTERM_BP_DIRECT	cell cycle	38	7e-05	4.1549	ENSRNOT00000085115, ENSRNOT00000016237, ENSRNOT00000001579, ENSRNOT00000028793, ENSRNOT00000047314, ENSRNOT00000028109, ENSRNOT00000028898, ENSRNOT00000043461, ENSRNOT00000066973, ENSRNOT00000064581, ENSRNOT00000051680, ENSRNOT00000064824, ENSRNOT00000036051, ENSRNOT00000091004, ENSRNOT00000075265, ENSRNOT00000007879, ENSRNOT00000018488, ENSRNOT00000019234, ENSRNOT00000090735, ENSRNOT00000071663,…
GOTERM_BP_DIRECT	mitotic cell cycle	19	0.0002	3.69897	ENSRNOT00000082846, ENSRNOT00000065677, ENSRNOT00000080319, ENSRNOT00000074058, ENSRNOT00000015015, ENSRNOT00000086806, ENSRNOT00000067453, ENSRNOT00000000783, ENSRNOT00000087192, ENSRNOT00000055102, ENSRNOT00000091551, ENSRNOT00000084128, ENSRNOT00000010025, ENSRNOT00000023139, ENSRNOT00000004525, ENSRNOT00000034565, ENSRNOT00000034723, ENSRNOT00000031074, ENSRNOT00000036702, ENSRNOT00000089093,…
GOTERM_BP_DIRECT	regulation of cell proliferation	61	0.00022	3.65758	ENSRNOT00000008012, ENSRNOT00000056251, ENSRNOT00000022478, ENSRNOT00000011344, ENSRNOT00000040845, ENSRNOT00000041688, ENSRNOT00000020994, ENSRNOT00000081226, ENSRNOT00000067325, ENSRNOT00000008149, ENSRNOT00000001475, ENSRNOT00000022658, ENSRNOT00000085674, ENSRNOT00000090161, ENSRNOT00000002522, ENSRNOT00000086130, ENSRNOT00000003567, ENSRNOT00000033406, ENSRNOT00000001916, ENSRNOT00000077202,…
GOTERM_BP_DIRECT	negative regulation of epithelial cell proliferation	25	0.00028	3.55284	ENSRNOT00000026287, ENSRNOT00000092075, ENSRNOT00000013216, ENSRNOT00000090442, ENSRNOT00000080695, ENSRNOT00000090923, ENSRNOT00000003313, ENSRNOT00000079631, ENSRNOT00000086130, ENSRNOT00000058885, ENSRNOT00000061054, ENSRNOT00000000434, ENSRNOT00000090735, ENSRNOT00000076938, ENSRNOT00000016221, ENSRNOT00000083134, ENSRNOT00000015172, ENSRNOT00000022331, ENSRNOT00000008898, ENSRNOT00000042539,…
GOTERM_BP_DIRECT	positive regulation of cell proliferation	113	0.0004	3.39794	ENSRNOT00000086033, ENSRNOT00000040847, ENSRNOT00000079080, ENSRNOT00000013991, ENSRNOT00000068520, ENSRNOT00000005829, ENSRNOT00000022799, ENSRNOT00000080695, ENSRNOT00000085880, ENSRNOT00000026685, ENSRNOT00000024917, ENSRNOT00000089544, ENSRNOT00000044163, ENSRNOT00000010762, ENSRNOT00000051342, ENSRNOT00000016036, ENSRNOT00000019109, ENSRNOT00000082675, ENSRNOT00000084563, ENSRNOT00000083811,…
GOTERM_BP_DIRECT	G2/M transition of mitotic cell cycle	16	0.00043	3.36653	ENSRNOT00000008012, ENSRNOT00000025629, ENSRNOT00000082359, ENSRNOT00000043822, ENSRNOT00000025314, ENSRNOT00000006389, ENSRNOT00000057036, ENSRNOT00000011226, ENSRNOT00000091731, ENSRNOT00000007698, ENSRNOT00000090161, ENSRNOT00000037712, ENSRNOT00000056800, ENSRNOT00000011166, ENSRNOT00000008003, ENSRNOT00000008898, ENSRNOT00000089178, ENSRNOT00000047126, ENSRNOT00000085591, ENSRNOT00000037368,…
GOTERM_BP_DIRECT	positive regulation of fibroblast proliferation	24	0.00058	3.23657	ENSRNOT00000015081, ENSRNOT00000086033, ENSRNOT00000003686, ENSRNOT00000006188, ENSRNOT00000079080, ENSRNOT00000089504, ENSRNOT00000091731, ENSRNOT00000006087, ENSRNOT00000047234, ENSRNOT00000091476, ENSRNOT00000024917, ENSRNOT00000008719, ENSRNOT00000001916, ENSRNOT00000019772, ENSRNOT00000082846, ENSRNOT00000076763, ENSRNOT00000079745, ENSRNOT00000011731, ENSRNOT00000081822, ENSRNOT00000087007,…
GOTERM_BP_DIRECT	positive regulation of cell cycle	16	0.0006	3.22185	ENSRNOT00000085115, ENSRNOT00000082846, ENSRNOT00000022331, ENSRNOT00000006188, ENSRNOT00000085925, ENSRNOT00000027891, ENSRNOT00000084018, ENSRNOT00000068183, ENSRNOT00000086790, ENSRNOT00000022596, ENSRNOT00000006246, ENSRNOT00000080811, ENSRNOT00000077122, ENSRNOT00000003313, ENSRNOT00000086116, ENSRNOT00000027315, ENSRNOT00000072387
GOTERM_BP_DIRECT	positive regulation of mitotic cell cycle	14	0.001	3	ENSRNOT00000082846, ENSRNOT00000079080, ENSRNOT00000035409, ENSRNOT00000084217, ENSRNOT00000001475, ENSRNOT00000026662, ENSRNOT00000051064, ENSRNOT00000055073, ENSRNOT00000086806, ENSRNOT00000012617, ENSRNOT00000000783, ENSRNOT00000083481, ENSRNOT00000036051, ENSRNOT00000010079, ENSRNOT00000086116, ENSRNOT00000081113, ENSRNOT00000072387
GOTERM_BP_DIRECT	positive regulation of G1/S transition of mitotic cell cycle	11	0.0021	2.67778	ENSRNOT00000085316, ENSRNOT00000079779, ENSRNOT00000072027, ENSRNOT00000023664, ENSRNOT00000012478, ENSRNOT00000001138, ENSRNOT00000009113, ENSRNOT00000022683, ENSRNOT00000006389, ENSRNOT00000087958, ENSRNOT00000026473
GOTERM_BP_DIRECT	DNA replication-dependent nucleosome assembly	11	0.0031	2.50864	ENSRNOT00000071107, ENSRNOT00000002085, ENSRNOT00000085381, ENSRNOT00000022170, ENSRNOT00000006964, ENSRNOT00000040210, ENSRNOT00000084420, ENSRNOT00000072119, ENSRNOT00000073188, ENSRNOT00000085945, ENSRNOT00000002299
GOTERM_BP_DIRECT	T cell proliferation involved in immune response	5	0.0032	2.49485	ENSRNOT00000085115, ENSRNOT00000057472, ENSRNOT00000073270, ENSRNOT00000039221, ENSRNOT00000078936
GOTERM_BP_DIRECT	positive regulation of smooth muscle cell proliferation	25	0.0032	2.49485	ENSRNOT00000086033, ENSRNOT00000006188, ENSRNOT00000085925, ENSRNOT00000019361, ENSRNOT00000042790, ENSRNOT00000055073, ENSRNOT00000013043, ENSRNOT00000006087, ENSRNOT00000003567, ENSRNOT00000044163, ENSRNOT00000019192, ENSRNOT00000012492, ENSRNOT00000025157, ENSRNOT00000028234, ENSRNOT00000080751, ENSRNOT00000022331, ENSRNOT00000089178, ENSRNOT00000006071, ENSRNOT00000068183, ENSRNOT00000001138,…
GOTERM_BP_DIRECT	positive regulation of DNA replication	16	0.0034	2.46852	ENSRNOT00000015081, ENSRNOT00000013516, ENSRNOT00000018118, ENSRNOT00000067448, ENSRNOT00000028887, ENSRNOT00000007231, ENSRNOT00000081822, ENSRNOT00000011731, ENSRNOT00000079011, ENSRNOT00000092558, ENSRNOT00000086806, ENSRNOT00000006087, ENSRNOT00000000783, ENSRNOT00000091476, ENSRNOT00000005995, ENSRNOT00000000438, ENSRNOT00000064744, ENSRNOT00000028038, ENSRNOT00000081113
GOTERM_BP_DIRECT	negative regulation of smooth muscle cell proliferation	15	0.0035	2.45593	ENSRNOT00000042055, ENSRNOT00000085115, ENSRNOT00000051858, ENSRNOT00000042539, ENSRNOT00000006071, ENSRNOT00000001138, ENSRNOT00000089988, ENSRNOT00000075057, ENSRNOT00000088355, ENSRNOT00000074583, ENSRNOT00000085897, ENSRNOT00000026350, ENSRNOT00000019192, ENSRNOT00000005885, ENSRNOT00000022255, ENSRNOT00000084884, ENSRNOT00000081017
GOTERM_BP_DIRECT	cell proliferation	55	0.0045	2.34679	ENSRNOT00000032972, ENSRNOT00000006188, ENSRNOT00000023395, ENSRNOT00000021804, ENSRNOT00000013991, ENSRNOT00000001475, ENSRNOT00000086790, ENSRNOT00000020669, ENSRNOT00000049481, ENSRNOT00000047161, ENSRNOT00000044163, ENSRNOT00000089545, ENSRNOT00000010762, ENSRNOT00000025415, ENSRNOT00000079510, ENSRNOT00000023463, ENSRNOT00000092086, ENSRNOT00000008492, ENSRNOT00000087062, ENSRNOT00000083811,…
GOTERM_BP_DIRECT	mitotic cell cycle checkpoint	12	0.0046	2.33724	ENSRNOT00000073270, ENSRNOT00000091419, ENSRNOT00000008898, ENSRNOT00000024801, ENSRNOT00000081272, ENSRNOT00000012404, ENSRNOT00000011226, ENSRNOT00000083151, ENSRNOT00000074404, ENSRNOT00000086656, ENSRNOT00000007285, ENSRNOT00000063990, ENSRNOT00000090161, ENSRNOT00000051612, ENSRNOT00000010762, ENSRNOT00000006852
GOTERM_BP_DIRECT	regulation of mitotic nuclear division	9	0.005	2.30103	ENSRNOT00000028786, ENSRNOT00000017448, ENSRNOT00000085880, ENSRNOT00000018118, ENSRNOT00000040513, ENSRNOT00000050188, ENSRNOT00000029416, ENSRNOT00000034565, ENSRNOT00000039344
GOTERM_BP_DIRECT	regulation of cell growth	20	0.005	2.30103	ENSRNOT00000065909, ENSRNOT00000083678, ENSRNOT00000085635, ENSRNOT00000041688, ENSRNOT00000035240, ENSRNOT00000090629, ENSRNOT00000088355, ENSRNOT00000019501, ENSRNOT00000003313, ENSRNOT00000085380, ENSRNOT00000029487, ENSRNOT00000003940, ENSRNOT00000007004, ENSRNOT00000020528, ENSRNOT00000017396, ENSRNOT00000023068, ENSRNOT00000005070, ENSRNOT00000051892, ENSRNOT00000014559, ENSRNOT00000089196,…
GOTERM_BP_DIRECT	cell cycle arrest	22	0.0084	2.07572	ENSRNOT00000085115, ENSRNOT00000027411, ENSRNOT00000070912, ENSRNOT00000006188, ENSRNOT00000008898, ENSRNOT00000081415, ENSRNOT00000012088, ENSRNOT00000050555, ENSRNOT00000019272, ENSRNOT00000091731, ENSRNOT00000017151, ENSRNOT00000012985, ENSRNOT00000007698, ENSRNOT00000010591, ENSRNOT00000078944, ENSRNOT00000019408, ENSRNOT00000003313, ENSRNOT00000037363, ENSRNOT00000076453, ENSRNOT00000083351,…
GOTERM_BP_DIRECT	smooth muscle cell proliferation	5	0.0084	2.07572	ENSRNOT00000058162, ENSRNOT00000024917, ENSRNOT00000020908, ENSRNOT00000011904, ENSRNOT00000049292
GOTERM_BP_DIRECT	DNA-dependent DNA replication	8	0.0095	2.02228	ENSRNOT00000039467, ENSRNOT00000002487, ENSRNOT00000063995, ENSRNOT00000085505, ENSRNOT00000001444, ENSRNOT00000026797, ENSRNOT00000005835, ENSRNOT00000019288
GOTERM_BP_DIRECT	inner cell mass cell proliferation	8	0.0095	2.02228	ENSRNOT00000077325, ENSRNOT00000090161, ENSRNOT00000010955, ENSRNOT00000047420, ENSRNOT00000001475, ENSRNOT00000024301, ENSRNOT00000011226, ENSRNOT00000091368, ENSRNOT00000035255
GOTERM_BP_DIRECT	negative regulation of cell growth	31	0.014	1.85387	NSRNOT00000041638, ENSRNOT00000085115, ENSRNOT00000084594, ENSRNOT00000027584, ENSRNOT00000042965, ENSRNOT00000050868, ENSRNOT00000006443, ENSRNOT00000012088, ENSRNOT00000077331, ENSRNOT00000021648, ENSRNOT00000091731, ENSRNOT00000080124, ENSRNOT00000081353, ENSRNOT00000016740, ENSRNOT00000082532, ENSRNOT00000001169, ENSRNOT00000024917, ENSRNOT00000003313, ENSRNOT00000002522, ENSRNOT00000065890, …
GOTERM_BP_DIRECT	negative regulation of glial cell proliferation	6	0.015	1.82391	ENSRNOT00000008898, ENSRNOT00000085988, ENSRNOT00000014089, ENSRNOT00000016088, ENSRNOT00000002346, ENSRNOT00000022683
GOTERM_BP_DIRECT	negative regulation of cell division	5	0.017	1.76955	ENSRNOT00000026287, ENSRNOT00000028793, ENSRNOT00000006188, ENSRNOT00000086130, ENSRNOT00000089005, ENSRNOT00000015065
GOTERM_BP_DIRECT	negative regulation of DNA replication	8	0.027	1.56864	ENSRNOT00000085115, ENSRNOT00000049967, ENSRNOT00000013516, ENSRNOT00000025389, ENSRNOT00000024801, ENSRNOT00000014664, ENSRNOT00000006852, ENSRNOT00000074389
GOTERM_BP_DIRECT	positive regulation of cell growth	22	0.034	1.46852	ENSRNOT00000077197, ENSRNOT00000077177, ENSRNOT00000079080, ENSRNOT00000061157, ENSRNOT00000013991, ENSRNOT00000089640, ENSRNOT00000005829, ENSRNOT00000022799, ENSRNOT00000076061, ENSRNOT00000006087, ENSRNOT00000003313, ENSRNOT00000079631, ENSRNOT00000025157, ENSRNOT00000076484, ENSRNOT00000018118, ENSRNOT00000010991, ENSRNOT00000079122, ENSRNOT00000081822, ENSRNOT00000024128, ENSRNOT00000080773,…
GOTERM_BP_DIRECT	homologous chromosome segregation	4	0.034	1.46852	ENSRNOT00000064581, ENSRNOT00000017314, ENSRNOT00000005070, ENSRNOT00000025629
GOTERM_BP_DIRECT	regulation of mitotic cell cycle	12	0.039	1.40894	ENSRNOT00000026287, ENSRNOT00000001579, ENSRNOT00000006188, ENSRNOT00000060417, ENSRNOT00000025629, ENSRNOT00000029416, ENSRNOT00000043461, ENSRNOT00000091731, ENSRNOT00000078944, ENSRNOT00000085835, ENSRNOT00000086130, ENSRNOT00000000628, ENSRNOT00000006784, ENSRNOT00000019234, ENSRNOT00000072387, ENSRNOT00000078667
GOTERM_BP_DIRECT	positive regulation of cell growth involved in cardiac muscle cell development	6	0.049	1.3098	ENSRNOT00000028545, ENSRNOT00000080751, ENSRNOT00000080185, ENSRNOT00000033917, ENSRNOT00000014704, ENSRNOT00000005995, ENSRNOT00000019361, ENSRNOT00000081822
GOTERM_BP_DIRECT	positive regulation of endothelial cell proliferation	19	0.032	1.49485	ENSRNOT00000074993, ENSRNOT00000021133, ENSRNOT00000080751, ENSRNOT00000068601, ENSRNOT00000085089, ENSRNOT00000083811, ENSRNOT00000042790, ENSRNOT00000011731, ENSRNOT00000026662, ENSRNOT00000077378, ENSRNOT00000055073, ENSRNOT00000089538, ENSRNOT00000080695, ENSRNOT00000028740, ENSRNOT00000066670, ENSRNOT00000006246, ENSRNOT00000017635, ENSRNOT00000044163, ENSRNOT00000071405, ENSRNOT00000009448,…
GOTERM_BP_DIRECT	cell cycle phase transition	4	0.034	1.46852	ENSRNOT00000066973, ENSRNOT00000083899, ENSRNOT00000047241, ENSRNOT00000064785, ENSRNOT00000068520, ENSRNOT00000029865, ENSRNOT00000029878
