# Supplementary material for: lncRNA Expression Reveals the Potential Regulatory Roles in Hepatocyte Proliferation during Rat Liver Regeneration
Source: Biomed Res Int. 2019 Nov 11;2019:8597953. doi: 10.1155/2019/8597953 (PMC6885160; doi:10.1155/2019/8597953)
Supplement: Supplementary Materials — Table S1: results of analyzing differentially expressed lncRNAs at 2, 6, 12, 24, 30, 36, 72,120, and 168 h after PH was compared with CG. Table S2: results of analyzing differentially expressed mRNAs at 2, 6, 12, 24, 30, 36, 72,120, and 168 h after PH was compared with CG. Table S3: results of GO enrichment analysis of differentially expressed mRNAs. Table S4: screened coexpression pairs between DE lncRNAs and proliferation-related DE mRNAs based on the Pearson correlation coefficient. [file 8597953.f1.zip › 8597953.f1/Table S4.xlsx]

## Sheet: Sheet1
mrna_id	lnc_id	Pearson's correlation coefficient	p-value	source_name	target_name
ENSRNOT00000010144	NONRATT004729.2	0.9999	4.29807e-16	Mis12	NONRATT004729.2
ENSRNOT00000010144	NONRATT001914.2	0.999899	4.59203e-16	Mis12	NONRATT001914.2
ENSRNOT00000010144	NONRATT006056.2	0.999896	5.20556e-16	Mis12	NONRATT006056.2
ENSRNOT00000010144	NONRATT026655.2	0.999881	8.63582e-16	Mis12	NONRATT026655.2
ENSRNOT00000010144	NONRATT002328.2	0.999881	8.63587e-16	Mis12	NONRATT002328.2
ENSRNOT00000010144	NONRATT021453.2	0.999881	8.63587e-16	Mis12	NONRATT021453.2
ENSRNOT00000010144	NONRATT004028.2	0.999881	8.63587e-16	Mis12	NONRATT004028.2
ENSRNOT00000010144	NONRATT000577.2	0.999881	8.63587e-16	Mis12	NONRATT000577.2
ENSRNOT00000010144	NONRATT031233.2	0.999881	8.63587e-16	Mis12	NONRATT031233.2
ENSRNOT00000010144	NONRATT009502.2	0.999881	8.66054e-16	Mis12	NONRATT009502.2
ENSRNOT00000010144	NONRATT003193.2	0.99988	9.17555e-16	Mis12	NONRATT003193.2
ENSRNOT00000010144	NONRATT022443.2	0.999879	9.45943e-16	Mis12	NONRATT022443.2
ENSRNOT00000010144	NONRATT015823.2	0.999711	3.07158e-14	Mis12	NONRATT015823.2
ENSRNOT00000052312	NONRATT009960.2	0.998895	6.52514e-12	Nusap1	NONRATT009960.2
ENSRNOT00000006235	NONRATT008580.2	0.998699	1.25286e-11	Nek2l1	NONRATT008580.2
ENSRNOT00000051783	NONRATT008580.2	0.998688	1.29303e-11	Bub1	NONRATT008580.2
ENSRNOT00000036151	NONRATT008580.2	0.998458	2.46637e-11	Cdc20	NONRATT008580.2
ENSRNOT00000032972	NONRATT008580.2	0.998399	2.86586e-11	Tacc3	NONRATT008580.2
ENSRNOT00000074058	NONRATT008580.2	0.998371	3.07119e-11	Rrm1	NONRATT008580.2
ENSRNOT00000083016	NONRATT008570.2	0.998317	3.49996e-11	Ncapd2	NONRATT008570.2
ENSRNOT00000004525	NONRATT009960.2	0.997943	7.82041e-11	Cenpf	NONRATT009960.2
ENSRNOT00000017532	NONRATT008580.2	0.997936	7.92673e-11	Prc1	NONRATT008580.2
ENSRNOT00000021308	NONRATT008570.2	0.997784	1.05224e-10	Fam83d	NONRATT008570.2
ENSRNOT00000025903	NONRATT008570.2	0.997592	1.46566e-10	Kif2c	NONRATT008570.2
ENSRNOT00000032972	NONRATT018485.2	0.997318	2.25806e-10	Tacc3	NONRATT018485.2
ENSRNOT00000008837	NONRATT008580.2	0.997276	2.39959e-10	Spc25	NONRATT008580.2
ENSRNOT00000080119	NONRATT012538.2	0.997195	2.69962e-10	Hist1h2ak	NONRATT012538.2
ENSRNOT00000008492	NONRATT018485.2	0.997178	2.76547e-10	Aurkb	NONRATT018485.2
ENSRNOT00000003650	NONRATT008580.2	0.997128	2.96466e-10	Nuf2	NONRATT008580.2
ENSRNOT00000008492	NONRATT008580.2	0.997114	3.02266e-10	Aurkb	NONRATT008580.2
ENSRNOT00000082846	NONRATT008580.2	0.997096	3.09885e-10	Ccnb1	NONRATT008580.2
ENSRNOT00000021320	NONRATT015823.2	0.997088	3.13524e-10	Esco2	NONRATT015823.2
ENSRNOT00000016157	NONRATT028358.2	0.996919	3.92561e-10	Ncaph	NONRATT028358.2
ENSRNOT00000034565	NONRATT009960.2	0.996806	4.53416e-10	Cenpe	NONRATT009960.2
ENSRNOT00000052312	NONRATT018485.2	0.996784	4.65938e-10	Nusap1	NONRATT018485.2
ENSRNOT00000051783	NONRATT018485.2	0.996761	4.79794e-10	Bub1	NONRATT018485.2
ENSRNOT00000076451	NONRATT033407.1	0.996653	5.4715e-10	Esco2	NONRATT033407.1
ENSRNOT00000066277	NONRATT028358.2	0.996593	5.87338e-10	Melk	NONRATT028358.2
ENSRNOT00000010406	NONRATT003289.2	0.996509	6.46893e-10	Bub1b	NONRATT003289.2
ENSRNOT00000085880	NONRATT016343.2	0.996496	6.5667e-10	Kif20b	NONRATT016343.2
ENSRNOT00000010406	NONRATT028358.2	0.996432	7.06035e-10	Bub1b	NONRATT028358.2
ENSRNOT00000077899	NONRATT008580.2	0.996422	7.13958e-10	Mastl	NONRATT008580.2
ENSRNOT00000079726	NONRATT008580.2	0.996417	7.17972e-10	Kif11	NONRATT008580.2
ENSRNOT00000085344	NONRATT008580.2	0.996396	7.3528e-10	Top2a	NONRATT008580.2
ENSRNOT00000021156	NONRATT008580.2	0.99637	7.56486e-10	Ccna2	NONRATT008580.2
ENSRNOT00000020803	NONRATT008580.2	0.99632	7.98577e-10	Cdca3	NONRATT008580.2
ENSRNOT00000091172	NONRATT030261.2	0.996309	8.08371e-10	Brip1	NONRATT030261.2
ENSRNOT00000083151	NONRATT009960.2	0.99625	8.61165e-10	Ttk	NONRATT009960.2
ENSRNOT00000012454	NONRATT027850.2	0.996182	9.25828e-10	Knstrn	NONRATT027850.2
ENSRNOT00000010406	NONRATT009960.2	0.99618	9.26958e-10	Bub1b	NONRATT009960.2
ENSRNOT00000029416	NONRATT003289.2	0.996077	1.03142e-09	Fbxo5	NONRATT003289.2
ENSRNOT00000082618	NONRATT033407.1	0.996056	1.05348e-09	Fancd2	NONRATT033407.1
ENSRNOT00000031163	NONRATT018485.2	0.995942	1.18027e-09	Cdca2	NONRATT018485.2
ENSRNOT00000079726	NONRATT009960.2	0.995924	1.20111e-09	Kif11	NONRATT009960.2
ENSRNOT00000035512	NONRATT032352.1	0.995884	1.24997e-09	E2f8	NONRATT032352.1
ENSRNOT00000035255	NONRATT033407.1	0.995877	1.25808e-09	Ncapg2	NONRATT033407.1
ENSRNOT00000076451	NONRATT008580.2	0.995875	1.2606e-09	Esco2	NONRATT008580.2
ENSRNOT00000022133	NONRATT016343.2	0.995847	1.29478e-09	Cep55	NONRATT016343.2
ENSRNOT00000048293	NONRATT008580.2	0.995782	1.37851e-09	Cdca8	NONRATT008580.2
ENSRNOT00000048293	NONRATT008570.2	0.995728	1.45032e-09	Cdca8	NONRATT008570.2
ENSRNOT00000007285	NONRATT005357.2	0.99572	1.46033e-09	Mad2l1	NONRATT005357.2
ENSRNOT00000012454	NONRATT008580.2	0.995709	1.47498e-09	Knstrn	NONRATT008580.2
ENSRNOT00000079726	NONRATT016343.2	0.995692	1.49955e-09	Kif11	NONRATT016343.2
ENSRNOT00000029416	NONRATT028358.2	0.995659	1.54492e-09	Fbxo5	NONRATT028358.2
ENSRNOT00000048293	NONRATT028358.2	0.995624	1.5954e-09	Cdca8	NONRATT028358.2
ENSRNOT00000079726	NONRATT018485.2	0.995599	1.63223e-09	Kif11	NONRATT018485.2
ENSRNOT00000083340	NONRATT033407.1	0.995577	1.66483e-09	Cdk5rap2	NONRATT033407.1
ENSRNOT00000077899	NONRATT028358.2	0.99555	1.70681e-09	Mastl	NONRATT028358.2
ENSRNOT00000031163	NONRATT033407.1	0.995512	1.76621e-09	Cdca2	NONRATT033407.1
ENSRNOT00000051783	NONRATT009960.2	0.99548	1.81657e-09	Bub1	NONRATT009960.2
ENSRNOT00000010696	NONRATT005180.2	0.995427	1.90286e-09	Ccne2	NONRATT005180.2
ENSRNOT00000022133	NONRATT009960.2	0.995415	1.923e-09	Cep55	NONRATT009960.2
ENSRNOT00000010144	NONRATT014960.2	0.99539	1.9644e-09	Mis12	NONRATT014960.2
ENSRNOT00000039344	NONRATT016343.2	0.995298	2.12691e-09	Bora	NONRATT016343.2
ENSRNOT00000012404	NONRATT016047.2	0.995289	2.14235e-09	Zwilch	NONRATT016047.2
ENSRNOT00000021308	NONRATT028358.2	0.995269	2.18013e-09	Fam83d	NONRATT028358.2
ENSRNOT00000021320	NONRATT004729.2	0.995222	2.26683e-09	Esco2	NONRATT004729.2
ENSRNOT00000051783	NONRATT033407.1	0.995209	2.29154e-09	Bub1	NONRATT033407.1
ENSRNOT00000021320	NONRATT001914.2	0.995209	2.29162e-09	Esco2	NONRATT001914.2
ENSRNOT00000021320	NONRATT006056.2	0.995194	2.32053e-09	Esco2	NONRATT006056.2
ENSRNOT00000003650	NONRATT018485.2	0.995188	2.33236e-09	Nuf2	NONRATT018485.2
ENSRNOT00000021320	NONRATT026655.2	0.995129	2.44822e-09	Esco2	NONRATT026655.2
ENSRNOT00000021320	NONRATT002328.2	0.995129	2.44822e-09	Esco2	NONRATT002328.2
ENSRNOT00000021320	NONRATT031233.2	0.995129	2.44822e-09	Esco2	NONRATT031233.2
ENSRNOT00000021320	NONRATT021453.2	0.995129	2.44822e-09	Esco2	NONRATT021453.2
ENSRNOT00000021320	NONRATT004028.2	0.995129	2.44822e-09	Esco2	NONRATT004028.2
ENSRNOT00000021320	NONRATT000577.2	0.995129	2.44822e-09	Esco2	NONRATT000577.2
ENSRNOT00000021320	NONRATT009502.2	0.995128	2.45008e-09	Esco2	NONRATT009502.2
ENSRNOT00000021320	NONRATT003193.2	0.995112	2.48258e-09	Esco2	NONRATT003193.2
ENSRNOT00000021320	NONRATT022443.2	0.995104	2.50004e-09	Esco2	NONRATT022443.2
ENSRNOT00000002487	NONRATT018485.2	0.995095	2.5185e-09	Rfc4	NONRATT018485.2
ENSRNOT00000032972	NONRATT028358.2	0.995043	2.62497e-09	Tacc3	NONRATT028358.2
ENSRNOT00000022133	NONRATT008580.2	0.99501	2.69624e-09	Cep55	NONRATT008580.2
ENSRNOT00000085880	NONRATT009960.2	0.995006	2.70535e-09	Kif20b	NONRATT009960.2
ENSRNOT00000031163	NONRATT008580.2	0.994987	2.74677e-09	Cdca2	NONRATT008580.2
ENSRNOT00000025629	NONRATT008580.2	0.994951	2.82569e-09	Plk1	NONRATT008580.2
ENSRNOT00000076451	NONRATT018485.2	0.994925	2.88431e-09	Esco2	NONRATT018485.2
ENSRNOT00000003650	NONRATT033407.1	0.994923	2.88882e-09	Nuf2	NONRATT033407.1
ENSRNOT00000085880	NONRATT008580.2	0.994913	2.91179e-09	Kif20b	NONRATT008580.2
ENSRNOT00000075997	NONRATT003289.2	0.99486	3.03494e-09	Pola1	NONRATT003289.2
ENSRNOT00000038176	NONRATT009960.2	0.994856	3.045e-09	Mki67	NONRATT009960.2
ENSRNOT00000084128	NONRATT001466.2	0.994853	3.05039e-09	Kif18b	NONRATT001466.2
ENSRNOT00000085880	NONRATT018485.2	0.994852	3.0535e-09	Kif20b	NONRATT018485.2
ENSRNOT00000002487	NONRATT033407.1	0.994774	3.24337e-09	Rfc4	NONRATT033407.1
ENSRNOT00000083016	NONRATT001466.2	0.994773	3.24472e-09	Ncapd2	NONRATT001466.2
ENSRNOT00000001825	NONRATT001466.2	0.994737	3.33594e-09	Mcm7	NONRATT001466.2
ENSRNOT00000004525	NONRATT016343.2	0.994689	3.45952e-09	Cenpf	NONRATT016343.2
ENSRNOT00000083151	NONRATT003289.2	0.994654	3.55144e-09	Ttk	NONRATT003289.2
ENSRNOT00000055102	NONRATT016047.2	0.994642	3.58297e-09	Aurka	NONRATT016047.2
ENSRNOT00000066277	NONRATT003289.2	0.994627	3.62189e-09	Melk	NONRATT003289.2
ENSRNOT00000083151	NONRATT016343.2	0.994579	3.75498e-09	Ttk	NONRATT016343.2
ENSRNOT00000048293	NONRATT027850.2	0.994572	3.7728e-09	Cdca8	NONRATT027850.2
ENSRNOT00000051783	NONRATT016343.2	0.994565	3.79329e-09	Bub1	NONRATT016343.2
ENSRNOT00000006235	NONRATT018485.2	0.99455	3.83406e-09	Nek2l1	NONRATT018485.2
ENSRNOT00000051783	NONRATT028358.2	0.994515	3.93355e-09	Bub1	NONRATT028358.2
ENSRNOT00000025903	NONRATT008580.2	0.994509	3.95124e-09	Kif2c	NONRATT008580.2
ENSRNOT00000012454	NONRATT029356.2	0.994475	4.05038e-09	Knstrn	NONRATT029356.2
ENSRNOT00000028109	NONRATT005180.2	0.994463	4.08642e-09	Brca1	NONRATT005180.2
ENSRNOT00000016157	NONRATT003289.2	0.994399	4.27659e-09	Ncaph	NONRATT003289.2
ENSRNOT00000036702	NONRATT030132.2	0.994393	4.29543e-09	Cenpt	NONRATT030132.2
ENSRNOT00000010955	NONRATT005180.2	0.994392	4.29794e-09	Gins1	NONRATT005180.2
ENSRNOT00000008837	NONRATT016343.2	0.994347	4.43794e-09	Spc25	NONRATT016343.2
ENSRNOT00000077899	NONRATT030132.2	0.994319	4.52471e-09	Mastl	NONRATT030132.2
ENSRNOT00000038176	NONRATT028358.2	0.994307	4.56483e-09	Mki67	NONRATT028358.2
ENSRNOT00000017314	NONRATT016045.2	0.994276	4.66535e-09	Espl1	NONRATT016045.2
ENSRNOT00000010955	NONRATT008580.2	0.99427	4.68267e-09	Gins1	NONRATT008580.2
ENSRNOT00000034565	NONRATT033407.1	0.994262	4.71159e-09	Cenpe	NONRATT033407.1
ENSRNOT00000079726	NONRATT028358.2	0.994197	4.92728e-09	Kif11	NONRATT028358.2
ENSRNOT00000007285	NONRATT018485.2	0.994196	4.93137e-09	Mad2l1	NONRATT018485.2
ENSRNOT00000031163	NONRATT028358.2	0.994184	4.96991e-09	Cdca2	NONRATT028358.2
ENSRNOT00000025629	NONRATT008570.2	0.994183	4.97372e-09	Plk1	NONRATT008570.2
ENSRNOT00000021308	NONRATT001466.2	0.99418	4.98538e-09	Fam83d	NONRATT001466.2
ENSRNOT00000051065	NONRATT008570.2	0.994167	5.02943e-09	Hjurp	NONRATT008570.2
ENSRNOT00000082846	NONRATT016047.2	0.994162	5.04576e-09	Ccnb1	NONRATT016047.2
ENSRNOT00000079726	NONRATT033407.1	0.99416	5.05449e-09	Kif11	NONRATT033407.1
ENSRNOT00000085344	NONRATT018485.2	0.994045	5.46204e-09	Top2a	NONRATT018485.2
ENSRNOT00000022133	NONRATT033405.1	0.994001	5.6272e-09	Cep55	NONRATT033405.1
ENSRNOT00000016157	NONRATT008570.2	0.993975	5.72503e-09	Ncaph	NONRATT008570.2
ENSRNOT00000077899	NONRATT008570.2	0.993953	5.80916e-09	Mastl	NONRATT008570.2
ENSRNOT00000068623	NONRATT001466.2	0.993945	5.83873e-09	Nsl1	NONRATT001466.2
ENSRNOT00000052312	NONRATT028358.2	0.993886	6.06957e-09	Nusap1	NONRATT028358.2
ENSRNOT00000016828	NONRATT033405.1	0.993868	6.13876e-09	Prim2	NONRATT033405.1
ENSRNOT00000008492	NONRATT028358.2	0.993855	6.19264e-09	Aurkb	NONRATT028358.2
ENSRNOT00000008837	NONRATT009960.2	0.99382	6.33616e-09	Spc25	NONRATT009960.2
ENSRNOT00000025629	NONRATT028358.2	0.993791	6.45481e-09	Plk1	NONRATT028358.2
ENSRNOT00000000783	NONRATT008580.2	0.993788	6.46644e-09	Cdk1	NONRATT008580.2
ENSRNOT00000038176	NONRATT003289.2	0.993777	6.51188e-09	Mki67	NONRATT003289.2
ENSRNOT00000032972	NONRATT033407.1	0.99376	6.58498e-09	Tacc3	NONRATT033407.1
ENSRNOT00000031163	NONRATT009960.2	0.993755	6.60329e-09	Cdca2	NONRATT009960.2
ENSRNOT00000052312	NONRATT003289.2	0.993726	6.72825e-09	Nusap1	NONRATT003289.2
ENSRNOT00000080498	NONRATT015583.2	0.993724	6.73775e-09	Ndc80	NONRATT015583.2
ENSRNOT00000074058	NONRATT028358.2	0.993719	6.75688e-09	Rrm1	NONRATT028358.2
ENSRNOT00000068623	NONRATT008570.2	0.993688	6.8934e-09	Nsl1	NONRATT008570.2
ENSRNOT00000083016	NONRATT028358.2	0.993686	6.90012e-09	Ncapd2	NONRATT028358.2
ENSRNOT00000017635	NONRATT028358.2	0.993682	6.9176e-09	Hmgb2l1	NONRATT028358.2
ENSRNOT00000022133	NONRATT028358.2	0.99367	6.97242e-09	Cep55	NONRATT028358.2
ENSRNOT00000034565	NONRATT016343.2	0.993668	6.9796e-09	Cenpe	NONRATT016343.2
ENSRNOT00000052312	NONRATT033407.1	0.993647	7.07452e-09	Nusap1	NONRATT033407.1
ENSRNOT00000051064	NONRATT008580.2	0.993612	7.23052e-09	Cdc25b	NONRATT008580.2
ENSRNOT00000038176	NONRATT033407.1	0.993599	7.28609e-09	Mki67	NONRATT033407.1
ENSRNOT00000063990	NONRATT033407.1	0.993585	7.35304e-09	Kntc1	NONRATT033407.1
ENSRNOT00000082618	NONRATT005180.2	0.993535	7.58272e-09	Fancd2	NONRATT005180.2
ENSRNOT00000034565	NONRATT018485.2	0.993527	7.62172e-09	Cenpe	NONRATT018485.2
ENSRNOT00000017532	NONRATT018485.2	0.993506	7.72023e-09	Prc1	NONRATT018485.2
ENSRNOT00000035255	NONRATT018485.2	0.993467	7.90665e-09	Ncapg2	NONRATT018485.2
ENSRNOT00000035255	NONRATT005180.2	0.993465	7.91684e-09	Ncapg2	NONRATT005180.2
ENSRNOT00000052312	NONRATT008580.2	0.993446	8.01078e-09	Nusap1	NONRATT008580.2
ENSRNOT00000010406	NONRATT030132.2	0.99344	8.03858e-09	Bub1b	NONRATT030132.2
ENSRNOT00000065677	NONRATT016343.2	0.993372	8.37832e-09	Cenpw	NONRATT016343.2
ENSRNOT00000007285	NONRATT008580.2	0.993366	8.40426e-09	Mad2l1	NONRATT008580.2
ENSRNOT00000074058	NONRATT018485.2	0.993355	8.46051e-09	Rrm1	NONRATT018485.2
ENSRNOT00000079726	NONRATT033405.1	0.993351	8.48214e-09	Kif11	NONRATT033405.1
ENSRNOT00000083151	NONRATT028358.2	0.993349	8.4913e-09	Ttk	NONRATT028358.2
ENSRNOT00000082846	NONRATT027850.2	0.993337	8.55366e-09	Ccnb1	NONRATT027850.2
ENSRNOT00000004525	NONRATT003289.2	0.993334	8.56981e-09	Cenpf	NONRATT003289.2
ENSRNOT00000010144	NONRATT002347.2	0.993329	8.59755e-09	Mis12	NONRATT002347.2
ENSRNOT00000012512	NONRATT027850.2	0.993299	8.74964e-09	Cenpa	NONRATT027850.2
ENSRNOT00000032972	NONRATT009960.2	0.993283	8.83538e-09	Tacc3	NONRATT009960.2
ENSRNOT00000065677	NONRATT033405.1	0.993258	8.96392e-09	Cenpw	NONRATT033405.1
ENSRNOT00000007285	NONRATT003292.2	0.993257	8.97187e-09	Mad2l1	NONRATT003292.2
ENSRNOT00000025903	NONRATT028358.2	0.993238	9.07104e-09	Kif2c	NONRATT028358.2
ENSRNOT00000055102	NONRATT008580.2	0.993232	9.10602e-09	Aurka	NONRATT008580.2
ENSRNOT00000067453	NONRATT005180.2	0.993195	9.30772e-09	Pole	NONRATT005180.2
ENSRNOT00000066277	NONRATT030132.2	0.993176	9.4095e-09	Melk	NONRATT030132.2
ENSRNOT00000029416	NONRATT009960.2	0.993093	9.87335e-09	Fbxo5	NONRATT009960.2
ENSRNOT00000082618	NONRATT009960.2	0.993038	1.01947e-08	Fancd2	NONRATT009960.2
ENSRNOT00000004525	NONRATT018485.2	0.993012	1.03453e-08	Cenpf	NONRATT018485.2
ENSRNOT00000020803	NONRATT027850.2	0.993007	1.03748e-08	Cdca3	NONRATT027850.2
ENSRNOT00000052312	NONRATT016343.2	0.993006	1.0378e-08	Nusap1	NONRATT016343.2
ENSRNOT00000083151	NONRATT030132.2	0.993003	1.0396e-08	Ttk	NONRATT030132.2
ENSRNOT00000003650	NONRATT030132.2	0.992981	1.05323e-08	Nuf2	NONRATT030132.2
ENSRNOT00000077899	NONRATT018485.2	0.99298	1.05365e-08	Mastl	NONRATT018485.2
ENSRNOT00000066277	NONRATT009960.2	0.992975	1.05631e-08	Melk	NONRATT009960.2
ENSRNOT00000051064	NONRATT016343.2	0.992893	1.10649e-08	Cdc25b	NONRATT016343.2
ENSRNOT00000005835	NONRATT005180.2	0.992871	1.12063e-08	Pole2	NONRATT005180.2
ENSRNOT00000091016	NONRATT009960.2	0.992853	1.13168e-08	Aurkb	NONRATT009960.2
ENSRNOT00000051064	NONRATT009960.2	0.992844	1.13717e-08	Cdc25b	NONRATT009960.2
ENSRNOT00000018644	NONRATT016343.2	0.992832	1.14521e-08	Ndc80	NONRATT016343.2
ENSRNOT00000017532	NONRATT028358.2	0.992832	1.14523e-08	Prc1	NONRATT028358.2
ENSRNOT00000024301	NONRATT030132.2	0.992773	1.18329e-08	Gins4	NONRATT030132.2
ENSRNOT00000003650	NONRATT009960.2	0.992734	1.20903e-08	Nuf2	NONRATT009960.2
ENSRNOT00000015651	NONRATT009960.2	0.992719	1.21881e-08	Spag5	NONRATT009960.2
ENSRNOT00000022133	NONRATT003289.2	0.9927	1.23129e-08	Cep55	NONRATT003289.2
ENSRNOT00000008492	NONRATT009960.2	0.992639	1.27339e-08	Aurkb	NONRATT009960.2
ENSRNOT00000006235	NONRATT028358.2	0.992631	1.27845e-08	Nek2l1	NONRATT028358.2
ENSRNOT00000063990	NONRATT009960.2	0.992627	1.28153e-08	Kntc1	NONRATT009960.2
ENSRNOT00000020803	NONRATT028358.2	0.992554	1.33296e-08	Cdca3	NONRATT028358.2
ENSRNOT00000010144	NONRATT023414.2	0.99254	1.34318e-08	Mis12	NONRATT023414.2
ENSRNOT00000063995	NONRATT016045.2	0.992511	1.36358e-08	Polq	NONRATT016045.2
ENSRNOT00000036151	NONRATT027850.2	0.992504	1.36904e-08	Cdc20	NONRATT027850.2
ENSRNOT00000012985	NONRATT027850.2	0.992496	1.37508e-08	Cdkn3	NONRATT027850.2
ENSRNOT00000091172	NONRATT016045.2	0.992475	1.39046e-08	Brip1	NONRATT016045.2
ENSRNOT00000004525	NONRATT028358.2	0.992455	1.40511e-08	Cenpf	NONRATT028358.2
ENSRNOT00000021320	NONRATT002347.2	0.992453	1.40619e-08	Esco2	NONRATT002347.2
ENSRNOT00000036702	NONRATT008570.2	0.992448	1.41037e-08	Cenpt	NONRATT008570.2
ENSRNOT00000002299	NONRATT001466.2	0.992444	1.41335e-08	Chaf1b	NONRATT001466.2
ENSRNOT00000017532	NONRATT027850.2	0.992441	1.41565e-08	Prc1	NONRATT027850.2
ENSRNOT00000018644	NONRATT033405.1	0.992427	1.42576e-08	Ndc80	NONRATT033405.1
ENSRNOT00000029416	NONRATT008570.2	0.992413	1.43685e-08	Fbxo5	NONRATT008570.2
ENSRNOT00000063995	NONRATT005180.2	0.992406	1.44201e-08	Polq	NONRATT005180.2
ENSRNOT00000072387	NONRATT027850.2	0.992385	1.45739e-08	Birc5	NONRATT027850.2
ENSRNOT00000085344	NONRATT028358.2	0.992374	1.466e-08	Top2a	NONRATT028358.2
ENSRNOT00000015651	NONRATT033407.1	0.99235	1.48501e-08	Spag5	NONRATT033407.1
ENSRNOT00000066277	NONRATT005180.2	0.992346	1.48786e-08	Melk	NONRATT005180.2
ENSRNOT00000015065	NONRATT009960.2	0.99234	1.4927e-08	Blm	NONRATT009960.2
ENSRNOT00000012404	NONRATT005357.2	0.992322	1.50622e-08	Zwilch	NONRATT005357.2
ENSRNOT00000001475	NONRATT028662.2	0.992299	1.52484e-08	Brca2	NONRATT028662.2
ENSRNOT00000064392	NONRATT008570.2	0.992287	1.53414e-08	Ccnf	NONRATT008570.2
ENSRNOT00000003650	NONRATT028358.2	0.992261	1.55514e-08	Nuf2	NONRATT028358.2
ENSRNOT00000085880	NONRATT033407.1	0.992254	1.56078e-08	Kif20b	NONRATT033407.1
ENSRNOT00000083151	NONRATT033405.1	0.992242	1.56987e-08	Ttk	NONRATT033405.1
ENSRNOT00000091016	NONRATT033405.1	0.992228	1.58184e-08	Aurkb	NONRATT033405.1
ENSRNOT00000063995	NONRATT030261.2	0.992225	1.58419e-08	Polq	NONRATT030261.2
ENSRNOT00000076451	NONRATT008517.2	0.992203	1.60199e-08	Esco2	NONRATT008517.2
ENSRNOT00000008837	NONRATT018485.2	0.992199	1.6051e-08	Spc25	NONRATT018485.2
ENSRNOT00000020803	NONRATT008570.2	0.992196	1.60734e-08	Cdca3	NONRATT008570.2
ENSRNOT00000080498	NONRATT018485.2	0.992127	1.66516e-08	Ndc80	NONRATT018485.2
ENSRNOT00000006235	NONRATT027850.2	0.992116	1.67452e-08	Nek2l1	NONRATT027850.2
ENSRNOT00000089178	NONRATT033407.1	0.992113	1.67655e-08	Skp2	NONRATT033407.1
ENSRNOT00000063995	NONRATT030132.2	0.992102	1.68634e-08	Polq	NONRATT030132.2
ENSRNOT00000085344	NONRATT009960.2	0.992095	1.69188e-08	Top2a	NONRATT009960.2
ENSRNOT00000034565	NONRATT028358.2	0.992093	1.69414e-08	Cenpe	NONRATT028358.2
ENSRNOT00000012512	NONRATT008580.2	0.992081	1.70401e-08	Cenpa	NONRATT008580.2
ENSRNOT00000082618	NONRATT018485.2	0.992047	1.73388e-08	Fancd2	NONRATT018485.2
ENSRNOT00000074058	NONRATT008570.2	0.992026	1.75166e-08	Rrm1	NONRATT008570.2
ENSRNOT00000017635	NONRATT001466.2	0.992011	1.76539e-08	Hmgb2l1	NONRATT001466.2
ENSRNOT00000077823	NONRATT030261.2	0.992007	1.76855e-08	Incenp	NONRATT030261.2
ENSRNOT00000021308	NONRATT008580.2	0.991994	1.78008e-08	Fam83d	NONRATT008580.2
ENSRNOT00000039344	NONRATT033407.1	0.991934	1.83372e-08	Bora	NONRATT033407.1
ENSRNOT00000022133	NONRATT016047.2	0.991909	1.85638e-08	Cep55	NONRATT016047.2
ENSRNOT00000085880	NONRATT028358.2	0.991906	1.85936e-08	Kif20b	NONRATT028358.2
ENSRNOT00000079726	NONRATT003289.2	0.991898	1.86698e-08	Kif11	NONRATT003289.2
ENSRNOT00000082618	NONRATT030132.2	0.991862	1.90001e-08	Fancd2	NONRATT030132.2
ENSRNOT00000077899	NONRATT009960.2	0.99184	1.92069e-08	Mastl	NONRATT009960.2
ENSRNOT00000017314	NONRATT030261.2	0.991839	1.92153e-08	Espl1	NONRATT030261.2
ENSRNOT00000036702	NONRATT005180.2	0.991839	1.92208e-08	Cenpt	NONRATT005180.2
ENSRNOT00000066277	NONRATT008580.2	0.991837	1.92381e-08	Melk	NONRATT008580.2
ENSRNOT00000025629	NONRATT033407.1	0.99183	1.9303e-08	Plk1	NONRATT033407.1
ENSRNOT00000038176	NONRATT008580.2	0.991819	1.94029e-08	Mki67	NONRATT008580.2
ENSRNOT00000038176	NONRATT018485.2	0.991797	1.96165e-08	Mki67	NONRATT018485.2
ENSRNOT00000066277	NONRATT008570.2	0.991778	1.9796e-08	Melk	NONRATT008570.2
ENSRNOT00000086806	NONRATT030132.2	0.991754	2.00295e-08	Cdk1	NONRATT030132.2
ENSRNOT00000074058	NONRATT033407.1	0.991754	2.00298e-08	Rrm1	NONRATT033407.1
ENSRNOT00000015651	NONRATT028358.2	0.991736	2.02028e-08	Spag5	NONRATT028358.2
ENSRNOT00000010955	NONRATT033407.1	0.991711	2.0448e-08	Gins1	NONRATT033407.1
ENSRNOT00000068623	NONRATT029356.2	0.991684	2.07144e-08	Nsl1	NONRATT029356.2
ENSRNOT00000029416	NONRATT030132.2	0.991677	2.0782e-08	Fbxo5	NONRATT030132.2
ENSRNOT00000031163	NONRATT015583.2	0.991668	2.08725e-08	Cdca2	NONRATT015583.2
ENSRNOT00000039344	NONRATT009960.2	0.991652	2.10391e-08	Bora	NONRATT009960.2
ENSRNOT00000010406	NONRATT008580.2	0.991635	2.12059e-08	Bub1b	NONRATT008580.2
ENSRNOT00000012454	NONRATT008570.2	0.991631	2.12495e-08	Knstrn	NONRATT008570.2
ENSRNOT00000002085	NONRATT008580.2	0.991625	2.13044e-08	Hat1	NONRATT008580.2
ENSRNOT00000021156	NONRATT028358.2	0.99162	2.13566e-08	Ccna2	NONRATT028358.2
ENSRNOT00000035255	NONRATT008580.2	0.991617	2.13924e-08	Ncapg2	NONRATT008580.2
ENSRNOT00000065677	NONRATT008580.2	0.991616	2.13954e-08	Cenpw	NONRATT008580.2
ENSRNOT00000022133	NONRATT008570.2	0.991609	2.14724e-08	Cep55	NONRATT008570.2
ENSRNOT00000021156	NONRATT027850.2	0.991554	2.20349e-08	Ccna2	NONRATT027850.2
ENSRNOT00000003650	NONRATT016343.2	0.991549	2.20914e-08	Nuf2	NONRATT016343.2
ENSRNOT00000007285	NONRATT033407.1	0.991549	2.20938e-08	Mad2l1	NONRATT033407.1
ENSRNOT00000066277	NONRATT033407.1	0.991545	2.21325e-08	Melk	NONRATT033407.1
ENSRNOT00000065677	NONRATT008570.2	0.991518	2.24126e-08	Cenpw	NONRATT008570.2
ENSRNOT00000000783	NONRATT027850.2	0.991496	2.26454e-08	Cdk1	NONRATT027850.2
ENSRNOT00000064392	NONRATT016047.2	0.991461	2.30198e-08	Ccnf	NONRATT016047.2
ENSRNOT00000004525	NONRATT033407.1	0.991461	2.30256e-08	Cenpf	NONRATT033407.1
ENSRNOT00000076451	NONRATT003292.2	0.991417	2.34955e-08	Esco2	NONRATT003292.2
ENSRNOT00000010955	NONRATT028358.2	0.9914	2.36886e-08	Gins1	NONRATT028358.2
ENSRNOT00000034565	NONRATT003289.2	0.991377	2.39348e-08	Cenpe	NONRATT003289.2
ENSRNOT00000018644	NONRATT003289.2	0.991362	2.4105e-08	Ndc80	NONRATT003289.2
ENSRNOT00000002085	NONRATT008570.2	0.991338	2.43745e-08	Hat1	NONRATT008570.2
ENSRNOT00000016157	NONRATT008580.2	0.991321	2.45601e-08	Ncaph	NONRATT008580.2
ENSRNOT00000016157	NONRATT001466.2	0.991315	2.46278e-08	Ncaph	NONRATT001466.2
ENSRNOT00000072493	NONRATT001466.2	0.99129	2.49219e-08	Cdca5	NONRATT001466.2
ENSRNOT00000005835	NONRATT008570.2	0.991289	2.49266e-08	Pole2	NONRATT008570.2
ENSRNOT00000008492	NONRATT015583.2	0.991287	2.49557e-08	Aurkb	NONRATT015583.2
ENSRNOT00000036151	NONRATT008517.2	0.991277	2.50671e-08	Cdc20	NONRATT008517.2
ENSRNOT00000040210	NONRATT015584.2	0.991276	2.50738e-08	LOC102551184	NONRATT015584.2
ENSRNOT00000077899	NONRATT003289.2	0.991264	2.52178e-08	Mastl	NONRATT003289.2
ENSRNOT00000082618	NONRATT028358.2	0.991246	2.54246e-08	Fancd2	NONRATT028358.2
ENSRNOT00000038296	NONRATT005984.2	0.99123	2.56058e-08	Prr11	NONRATT005984.2
ENSRNOT00000077899	NONRATT016343.2	0.99122	2.57303e-08	Mastl	NONRATT016343.2
ENSRNOT00000012512	NONRATT008570.2	0.991216	2.57764e-08	Cenpa	NONRATT008570.2
ENSRNOT00000022133	NONRATT018485.2	0.991212	2.58169e-08	Cep55	NONRATT018485.2
ENSRNOT00000091016	NONRATT003289.2	0.991201	2.59457e-08	Aurkb	NONRATT003289.2
ENSRNOT00000091016	NONRATT030132.2	0.991166	2.63644e-08	Aurkb	NONRATT030132.2
ENSRNOT00000039344	NONRATT018485.2	0.991166	2.63668e-08	Bora	NONRATT018485.2
ENSRNOT00000063990	NONRATT028358.2	0.991157	2.64717e-08	Kntc1	NONRATT028358.2
ENSRNOT00000017635	NONRATT008570.2	0.991132	2.6772e-08	Hmgb2l1	NONRATT008570.2
ENSRNOT00000072027	NONRATT016045.2	0.991117	2.69548e-08	Cdc45	NONRATT016045.2
ENSRNOT00000038176	NONRATT008517.2	0.991098	2.7179e-08	Mki67	NONRATT008517.2
ENSRNOT00000031163	NONRATT005180.2	0.991055	2.77132e-08	Cdca2	NONRATT005180.2
ENSRNOT00000018644	NONRATT008570.2	0.991044	2.78473e-08	Ndc80	NONRATT008570.2
ENSRNOT00000076451	NONRATT028358.2	0.991043	2.78586e-08	Esco2	NONRATT028358.2
ENSRNOT00000015651	NONRATT016343.2	0.990999	2.8404e-08	Spag5	NONRATT016343.2
ENSRNOT00000063990	NONRATT003289.2	0.990981	2.86401e-08	Kntc1	NONRATT003289.2
ENSRNOT00000006235	NONRATT008517.2	0.990975	2.871e-08	Nek2l1	NONRATT008517.2
ENSRNOT00000022256	NONRATT005335.2	0.990965	2.88426e-08	Ns5atp9	NONRATT005335.2
ENSRNOT00000064824	NONRATT005357.2	0.990963	2.88584e-08	Rbl1	NONRATT005357.2
ENSRNOT00000085880	NONRATT016047.2	0.990959	2.89114e-08	Kif20b	NONRATT016047.2
ENSRNOT00000010406	NONRATT018485.2	0.990953	2.89941e-08	Bub1b	NONRATT018485.2
ENSRNOT00000025389	NONRATT008570.2	0.990952	2.90044e-08	Gmnn	NONRATT008570.2
ENSRNOT00000002085	NONRATT033407.1	0.990947	2.90731e-08	Hat1	NONRATT033407.1
ENSRNOT00000015651	NONRATT018485.2	0.990921	2.9408e-08	Spag5	NONRATT018485.2
ENSRNOT00000012512	NONRATT029356.2	0.990902	2.96531e-08	Cenpa	NONRATT029356.2
ENSRNOT00000055102	NONRATT005357.2	0.990902	2.96537e-08	Aurka	NONRATT005357.2
ENSRNOT00000051064	NONRATT018485.2	0.990896	2.97224e-08	Cdc25b	NONRATT018485.2
ENSRNOT00000074148	NONRATT003289.2	0.990871	3.00522e-08	Lin9	NONRATT003289.2
ENSRNOT00000074148	NONRATT008570.2	0.990861	3.01849e-08	Lin9	NONRATT008570.2
ENSRNOT00000021320	NONRATT014960.2	0.990855	3.02612e-08	Esco2	NONRATT014960.2
ENSRNOT00000032972	NONRATT016343.2	0.990844	3.04153e-08	Tacc3	NONRATT016343.2
ENSRNOT00000083111	NONRATT028358.2	0.990841	3.04462e-08	Brca1	NONRATT028358.2
ENSRNOT00000051783	NONRATT003289.2	0.990824	3.067e-08	Bub1	NONRATT003289.2
ENSRNOT00000091688	NONRATT015584.2	0.990813	3.08281e-08	Hist1h1b	NONRATT015584.2
ENSRNOT00000032972	NONRATT015583.2	0.990789	3.11504e-08	Tacc3	NONRATT015583.2
ENSRNOT00000012038	NONRATT033407.1	0.990783	3.12272e-08	Kif14	NONRATT033407.1
ENSRNOT00000005835	NONRATT033407.1	0.990765	3.14743e-08	Pole2	NONRATT033407.1
ENSRNOT00000025903	NONRATT016047.2	0.990761	3.15244e-08	Kif2c	NONRATT016047.2
ENSRNOT00000017532	NONRATT009960.2	0.990731	3.19371e-08	Prc1	NONRATT009960.2
ENSRNOT00000036151	NONRATT018485.2	0.990726	3.2009e-08	Cdc20	NONRATT018485.2
ENSRNOT00000085880	NONRATT033405.1	0.990708	3.22534e-08	Kif20b	NONRATT033405.1
ENSRNOT00000086806	NONRATT015583.2	0.990671	3.27628e-08	Cdk1	NONRATT015583.2
ENSRNOT00000031163	NONRATT003289.2	0.99067	3.27759e-08	Cdca2	NONRATT003289.2
ENSRNOT00000036151	NONRATT028358.2	0.990668	3.28125e-08	Cdc20	NONRATT028358.2
ENSRNOT00000010406	NONRATT033407.1	0.990658	3.29551e-08	Bub1b	NONRATT033407.1
ENSRNOT00000082846	NONRATT005357.2	0.990649	3.30788e-08	Ccnb1	NONRATT005357.2
ENSRNOT00000063990	NONRATT016045.2	0.990638	3.32256e-08	Kntc1	NONRATT016045.2
ENSRNOT00000065677	NONRATT030132.2	0.990627	3.33915e-08	Cenpw	NONRATT030132.2
ENSRNOT00000018644	NONRATT009960.2	0.990621	3.34786e-08	Ndc80	NONRATT009960.2
ENSRNOT00000002085	NONRATT016047.2	0.990618	3.35151e-08	Hat1	NONRATT016047.2
ENSRNOT00000012088	NONRATT008580.2	0.990617	3.35243e-08	Cdkn2c	NONRATT008580.2
ENSRNOT00000015651	NONRATT030132.2	0.990597	3.38176e-08	Spag5	NONRATT030132.2
ENSRNOT00000037444	NONRATT016047.2	0.990588	3.39458e-08	Mis18a	NONRATT016047.2
ENSRNOT00000085880	NONRATT005357.2	0.990578	3.40868e-08	Kif20b	NONRATT005357.2
ENSRNOT00000002085	NONRATT033405.1	0.99056	3.43465e-08	Hat1	NONRATT033405.1
ENSRNOT00000028898	NONRATT030132.2	0.99056	3.43546e-08	Mcm8	NONRATT030132.2
ENSRNOT00000017314	NONRATT033407.1	0.990553	3.44495e-08	Espl1	NONRATT033407.1
ENSRNOT00000037444	NONRATT005357.2	0.990497	3.52768e-08	Mis18a	NONRATT005357.2
ENSRNOT00000065677	NONRATT016047.2	0.990494	3.53197e-08	Cenpw	NONRATT016047.2
ENSRNOT00000035255	NONRATT009960.2	0.99049	3.53741e-08	Ncapg2	NONRATT009960.2
ENSRNOT00000015065	NONRATT033407.1	0.990471	3.56614e-08	Blm	NONRATT033407.1
ENSRNOT00000075997	NONRATT028358.2	0.990461	3.58078e-08	Pola1	NONRATT028358.2
ENSRNOT00000080498	NONRATT033407.1	0.990449	3.5995e-08	Ndc80	NONRATT033407.1
ENSRNOT00000012404	NONRATT008580.2	0.990445	3.60481e-08	Zwilch	NONRATT008580.2
ENSRNOT00000080119	NONRATT012540.2	0.990435	3.61962e-08	Hist1h2ak	NONRATT012540.2
ENSRNOT00000005835	NONRATT028358.2	0.99043	3.62827e-08	Pole2	NONRATT028358.2
ENSRNOT00000004525	NONRATT008580.2	0.990379	3.70539e-08	Cenpf	NONRATT008580.2
ENSRNOT00000016828	NONRATT008570.2	0.990362	3.73171e-08	Prim2	NONRATT008570.2
ENSRNOT00000091016	NONRATT022152.2	0.990352	3.74756e-08	Aurkb	NONRATT022152.2
ENSRNOT00000068623	NONRATT030132.2	0.990337	3.77108e-08	Nsl1	NONRATT030132.2
ENSRNOT00000018644	NONRATT018439.2	0.990327	3.7861e-08	Ndc80	NONRATT018439.2
ENSRNOT00000012038	NONRATT009960.2	0.990319	3.79869e-08	Kif14	NONRATT009960.2
ENSRNOT00000025903	NONRATT027850.2	0.990307	3.81647e-08	Kif2c	NONRATT027850.2
ENSRNOT00000084128	NONRATT008570.2	0.990303	3.82318e-08	Kif18b	NONRATT008570.2
ENSRNOT00000051065	NONRATT016045.2	0.990302	3.8257e-08	Hjurp	NONRATT016045.2
ENSRNOT00000065677	NONRATT029356.2	0.990257	3.89718e-08	Cenpw	NONRATT029356.2
ENSRNOT00000074058	NONRATT009960.2	0.990246	3.91474e-08	Rrm1	NONRATT009960.2
ENSRNOT00000066277	NONRATT018485.2	0.990244	3.91709e-08	Melk	NONRATT018485.2
ENSRNOT00000080119	NONRATT015584.2	0.990227	3.94452e-08	Hist1h2ak	NONRATT015584.2
ENSRNOT00000012038	NONRATT016045.2	0.990209	3.97361e-08	Kif14	NONRATT016045.2
ENSRNOT00000016828	NONRATT018439.2	0.990165	4.04444e-08	Prim2	NONRATT018439.2
ENSRNOT00000076451	NONRATT015583.2	0.990165	4.04578e-08	Esco2	NONRATT015583.2
ENSRNOT00000008837	NONRATT028358.2	0.990142	4.08247e-08	Spc25	NONRATT028358.2
ENSRNOT00000063990	NONRATT030261.2	0.990136	4.09221e-08	Kntc1	NONRATT030261.2
ENSRNOT00000017532	NONRATT005357.2	0.990118	4.12219e-08	Prc1	NONRATT005357.2
ENSRNOT00000040210	NONRATT012540.2	0.990094	4.16357e-08	LOC102551184	NONRATT012540.2
ENSRNOT00000077899	NONRATT033407.1	0.99006	4.22094e-08	Mastl	NONRATT033407.1
ENSRNOT00000083151	NONRATT008580.2	0.990023	4.28392e-08	Ttk	NONRATT008580.2
ENSRNOT00000063995	NONRATT033407.1	0.990017	4.29381e-08	Polq	NONRATT033407.1
ENSRNOT00000035383	NONRATT008580.2	0.990001	4.32017e-08	Pmf1	NONRATT008580.2
ENSRNOT00000016157	NONRATT009960.2	0.989995	4.33141e-08	Ncaph	NONRATT009960.2
ENSRNOT00000051783	NONRATT005357.2	0.98998	4.35761e-08	Bub1	NONRATT005357.2
ENSRNOT00000077823	NONRATT030132.2	0.989977	4.36326e-08	Incenp	NONRATT030132.2
ENSRNOT00000063990	NONRATT005180.2	0.98996	4.39255e-08	Kntc1	NONRATT005180.2
ENSRNOT00000072493	NONRATT008570.2	0.989951	4.40859e-08	Cdca5	NONRATT008570.2
ENSRNOT00000008492	NONRATT008517.2	0.989934	4.438e-08	Aurkb	NONRATT008517.2
ENSRNOT00000012454	NONRATT016047.2	0.989925	4.45329e-08	Knstrn	NONRATT016047.2
ENSRNOT00000021156	NONRATT018485.2	0.98991	4.48016e-08	Ccna2	NONRATT018485.2
ENSRNOT00000051783	NONRATT008570.2	0.989908	4.48292e-08	Bub1	NONRATT008570.2
ENSRNOT00000082846	NONRATT028358.2	0.989907	4.4846e-08	Ccnb1	NONRATT028358.2
ENSRNOT00000082846	NONRATT016343.2	0.989888	4.51973e-08	Ccnb1	NONRATT016343.2
ENSRNOT00000039344	NONRATT033405.1	0.989883	4.52752e-08	Bora	NONRATT033405.1
ENSRNOT00000003650	NONRATT005180.2	0.989873	4.54495e-08	Nuf2	NONRATT005180.2
ENSRNOT00000036702	NONRATT028358.2	0.989838	4.6085e-08	Cenpt	NONRATT028358.2
ENSRNOT00000055102	NONRATT016343.2	0.98982	4.64062e-08	Aurka	NONRATT016343.2
ENSRNOT00000008492	NONRATT033407.1	0.989803	4.67253e-08	Aurkb	NONRATT033407.1
ENSRNOT00000076451	NONRATT005180.2	0.989801	4.67697e-08	Esco2	NONRATT005180.2
ENSRNOT00000018644	NONRATT028358.2	0.98979	4.69626e-08	Ndc80	NONRATT028358.2
ENSRNOT00000074148	NONRATT028358.2	0.989785	4.70519e-08	Lin9	NONRATT028358.2
ENSRNOT00000006235	NONRATT033407.1	0.989763	4.74564e-08	Nek2l1	NONRATT033407.1
ENSRNOT00000051064	NONRATT003289.2	0.989722	4.8231e-08	Cdc25b	NONRATT003289.2
ENSRNOT00000020014	NONRATT024911.2	0.989701	4.86243e-08	Ccne1	NONRATT024911.2
ENSRNOT00000064392	NONRATT028358.2	0.989686	4.88991e-08	Ccnf	NONRATT028358.2
ENSRNOT00000077823	NONRATT001466.2	0.989682	4.8973e-08	Incenp	NONRATT001466.2
ENSRNOT00000051064	NONRATT028358.2	0.989682	4.89798e-08	Cdc25b	NONRATT028358.2
ENSRNOT00000010955	NONRATT018485.2	0.989678	4.90518e-08	Gins1	NONRATT018485.2
ENSRNOT00000036702	NONRATT033407.1	0.989667	4.92672e-08	Cenpt	NONRATT033407.1
ENSRNOT00000036098	NONRATT018439.2	0.989663	4.93366e-08	Ska2	NONRATT018439.2
ENSRNOT00000017532	NONRATT016047.2	0.989659	4.94196e-08	Prc1	NONRATT016047.2
ENSRNOT00000008837	NONRATT003289.2	0.989657	4.94562e-08	Spc25	NONRATT003289.2
ENSRNOT00000003650	NONRATT008517.2	0.989621	5.01446e-08	Nuf2	NONRATT008517.2
ENSRNOT00000032972	NONRATT008517.2	0.989612	5.03123e-08	Tacc3	NONRATT008517.2
ENSRNOT00000065349	NONRATT008580.2	0.989601	5.05238e-08	Kifc1	NONRATT008580.2
ENSRNOT00000034565	NONRATT033405.1	0.989593	5.06758e-08	Cenpe	NONRATT033405.1
ENSRNOT00000012454	NONRATT016343.2	0.989557	5.13752e-08	Knstrn	NONRATT016343.2
ENSRNOT00000032972	NONRATT003289.2	0.989534	5.18378e-08	Tacc3	NONRATT003289.2
ENSRNOT00000051783	NONRATT033405.1	0.989525	5.20083e-08	Bub1	NONRATT033405.1
ENSRNOT00000010955	NONRATT008570.2	0.989507	5.23794e-08	Gins1	NONRATT008570.2
ENSRNOT00000000783	NONRATT008517.2	0.989501	5.24839e-08	Cdk1	NONRATT008517.2
ENSRNOT00000077899	NONRATT005180.2	0.989494	5.26308e-08	Mastl	NONRATT005180.2
ENSRNOT00000015065	NONRATT003289.2	0.989493	5.26427e-08	Blm	NONRATT003289.2
ENSRNOT00000082846	NONRATT018485.2	0.989488	5.27481e-08	Ccnb1	NONRATT018485.2
ENSRNOT00000034565	NONRATT008580.2	0.989479	5.29393e-08	Cenpe	NONRATT008580.2
ENSRNOT00000076451	NONRATT009960.2	0.989455	5.34065e-08	Esco2	NONRATT009960.2
ENSRNOT00000002085	NONRATT016343.2	0.989451	5.35037e-08	Hat1	NONRATT016343.2
ENSRNOT00000010696	NONRATT033407.1	0.989443	5.36486e-08	Ccne2	NONRATT033407.1
ENSRNOT00000006235	NONRATT009960.2	0.989443	5.36627e-08	Nek2l1	NONRATT009960.2
ENSRNOT00000065349	NONRATT008570.2	0.989428	5.39565e-08	Kifc1	NONRATT008570.2
ENSRNOT00000019799	NONRATT008570.2	0.989417	5.41856e-08	Lig1	NONRATT008570.2
ENSRNOT00000015065	NONRATT028358.2	0.989408	5.43643e-08	Blm	NONRATT028358.2
ENSRNOT00000082846	NONRATT008570.2	0.989394	5.46604e-08	Ccnb1	NONRATT008570.2
ENSRNOT00000015651	NONRATT016045.2	0.989387	5.48053e-08	Spag5	NONRATT016045.2
ENSRNOT00000019799	NONRATT008580.2	0.989383	5.48739e-08	Lig1	NONRATT008580.2
ENSRNOT00000017532	NONRATT016343.2	0.989369	5.51746e-08	Prc1	NONRATT016343.2
ENSRNOT00000015651	NONRATT003289.2	0.989368	5.51981e-08	Spag5	NONRATT003289.2
ENSRNOT00000051783	NONRATT008517.2	0.989366	5.52433e-08	Bub1	NONRATT008517.2
ENSRNOT00000079726	NONRATT008570.2	0.989305	5.64999e-08	Kif11	NONRATT008570.2
ENSRNOT00000025629	NONRATT003289.2	0.989303	5.65418e-08	Plk1	NONRATT003289.2
ENSRNOT00000074058	NONRATT016343.2	0.9893	5.66073e-08	Rrm1	NONRATT016343.2
ENSRNOT00000032972	NONRATT008570.2	0.989297	5.66732e-08	Tacc3	NONRATT008570.2
ENSRNOT00000032972	NONRATT030132.2	0.989292	5.67768e-08	Tacc3	NONRATT030132.2
ENSRNOT00000016157	NONRATT030132.2	0.989277	5.70941e-08	Ncaph	NONRATT030132.2
ENSRNOT00000012088	NONRATT018485.2	0.989255	5.75663e-08	Cdkn2c	NONRATT018485.2
ENSRNOT00000048293	NONRATT003289.2	0.989231	5.80906e-08	Cdca8	NONRATT003289.2
ENSRNOT00000077823	NONRATT003289.2	0.989222	5.82775e-08	Incenp	NONRATT003289.2
ENSRNOT00000055102	NONRATT018485.2	0.989218	5.83546e-08	Aurka	NONRATT018485.2
ENSRNOT00000012454	NONRATT028358.2	0.989213	5.84826e-08	Knstrn	NONRATT028358.2
ENSRNOT00000051065	NONRATT001466.2	0.989207	5.85956e-08	Hjurp	NONRATT001466.2
ENSRNOT00000091016	NONRATT028358.2	0.989203	5.86897e-08	Aurkb	NONRATT028358.2
ENSRNOT00000080498	NONRATT009960.2	0.989165	5.95102e-08	Ndc80	NONRATT009960.2
ENSRNOT00000083111	NONRATT003289.2	0.989161	5.95983e-08	Brca1	NONRATT003289.2
ENSRNOT00000018644	NONRATT008580.2	0.989154	5.97482e-08	Ndc80	NONRATT008580.2
ENSRNOT00000029416	NONRATT022152.2	0.989131	6.02687e-08	Fbxo5	NONRATT022152.2
ENSRNOT00000021308	NONRATT003289.2	0.989124	6.04191e-08	Fam83d	NONRATT003289.2
ENSRNOT00000082618	NONRATT003289.2	0.989118	6.05447e-08	Fancd2	NONRATT003289.2
ENSRNOT00000077899	NONRATT001466.2	0.989076	6.15003e-08	Mastl	NONRATT001466.2
ENSRNOT00000037444	NONRATT016343.2	0.989071	6.16024e-08	Mis18a	NONRATT016343.2
ENSRNOT00000082618	NONRATT015583.2	0.98907	6.16272e-08	Fancd2	NONRATT015583.2
ENSRNOT00000005835	NONRATT008580.2	0.989067	6.16813e-08	Pole2	NONRATT008580.2
ENSRNOT00000036702	NONRATT016045.2	0.989065	6.1731e-08	Cenpt	NONRATT016045.2
ENSRNOT00000083111	NONRATT001466.2	0.989051	6.20454e-08	Brca1	NONRATT001466.2
ENSRNOT00000007285	NONRATT016047.2	0.989051	6.20609e-08	Mad2l1	NONRATT016047.2
ENSRNOT00000051783	NONRATT016047.2	0.989047	6.21442e-08	Bub1	NONRATT016047.2
ENSRNOT00000055102	NONRATT028358.2	0.989043	6.22327e-08	Aurka	NONRATT028358.2
ENSRNOT00000085344	NONRATT003289.2	0.989039	6.23227e-08	Top2a	NONRATT003289.2
ENSRNOT00000002085	NONRATT028358.2	0.989007	6.30597e-08	Hat1	NONRATT028358.2
ENSRNOT00000040210	NONRATT012538.2	0.988999	6.32303e-08	LOC102551184	NONRATT012538.2
ENSRNOT00000083151	NONRATT008570.2	0.988992	6.34019e-08	Ttk	NONRATT008570.2
ENSRNOT00000083111	NONRATT008570.2	0.98899	6.34367e-08	Brca1	NONRATT008570.2
ENSRNOT00000010696	NONRATT008580.2	0.988977	6.37395e-08	Ccne2	NONRATT008580.2
ENSRNOT00000091016	NONRATT033407.1	0.988974	6.38164e-08	Aurkb	NONRATT033407.1
ENSRNOT00000077823	NONRATT028358.2	0.988973	6.38248e-08	Incenp	NONRATT028358.2
ENSRNOT00000021156	NONRATT009960.2	0.988965	6.40214e-08	Ccna2	NONRATT009960.2
ENSRNOT00000074058	NONRATT003289.2	0.988934	6.47462e-08	Rrm1	NONRATT003289.2
ENSRNOT00000010406	NONRATT008570.2	0.988926	6.49314e-08	Bub1b	NONRATT008570.2
ENSRNOT00000083151	NONRATT018485.2	0.988917	6.51244e-08	Ttk	NONRATT018485.2
ENSRNOT00000029416	TCONS_00021565	0.988917	6.51284e-08	Fbxo5	TCONS_00021565
ENSRNOT00000002487	NONRATT016343.2	0.98889	6.57726e-08	Rfc4	NONRATT016343.2
ENSRNOT00000007285	NONRATT008517.2	0.988886	6.58602e-08	Mad2l1	NONRATT008517.2
ENSRNOT00000037444	NONRATT033405.1	0.988882	6.5965e-08	Mis18a	NONRATT033405.1
ENSRNOT00000039344	NONRATT008580.2	0.988879	6.60365e-08	Bora	NONRATT008580.2
ENSRNOT00000017314	NONRATT005180.2	0.988877	6.60725e-08	Espl1	NONRATT005180.2
ENSRNOT00000015065	NONRATT016343.2	0.988875	6.6117e-08	Blm	NONRATT016343.2
ENSRNOT00000055102	NONRATT008570.2	0.988871	6.62207e-08	Aurka	NONRATT008570.2
ENSRNOT00000091016	NONRATT016343.2	0.988861	6.64547e-08	Aurkb	NONRATT016343.2
ENSRNOT00000075997	NONRATT009960.2	0.988844	6.68585e-08	Pola1	NONRATT009960.2
ENSRNOT00000017314	NONRATT028358.2	0.988842	6.69152e-08	Espl1	NONRATT028358.2
ENSRNOT00000025903	NONRATT001466.2	0.988838	6.70035e-08	Kif2c	NONRATT001466.2
ENSRNOT00000004525	NONRATT033405.1	0.988828	6.72453e-08	Cenpf	NONRATT033405.1
ENSRNOT00000039344	NONRATT005357.2	0.988822	6.7388e-08	Bora	NONRATT005357.2
ENSRNOT00000082618	NONRATT008580.2	0.988802	6.78724e-08	Fancd2	NONRATT008580.2
ENSRNOT00000085880	NONRATT030132.2	0.988797	6.79988e-08	Kif20b	NONRATT030132.2
ENSRNOT00000010406	TCONS_00021565	0.988797	6.80036e-08	Bub1b	TCONS_00021565
ENSRNOT00000074058	NONRATT027850.2	0.988784	6.83167e-08	Rrm1	NONRATT027850.2
ENSRNOT00000006235	NONRATT008570.2	0.988769	6.86662e-08	Nek2l1	NONRATT008570.2
ENSRNOT00000025629	NONRATT009960.2	0.988713	7.00404e-08	Plk1	NONRATT009960.2
ENSRNOT00000008492	NONRATT003289.2	0.988709	7.01356e-08	Aurkb	NONRATT003289.2
ENSRNOT00000022133	NONRATT033407.1	0.988702	7.03163e-08	Cep55	NONRATT033407.1
ENSRNOT00000047420	NONRATT033407.1	0.988673	7.10372e-08	Palb2	NONRATT033407.1
ENSRNOT00000037368	NONRATT001047.2	0.988673	7.10537e-08	Cdc25c	NONRATT001047.2
ENSRNOT00000085344	NONRATT008517.2	0.988672	7.10612e-08	Top2a	NONRATT008517.2
ENSRNOT00000036151	NONRATT009960.2	0.988671	7.10855e-08	Cdc20	NONRATT009960.2
ENSRNOT00000063990	NONRATT030132.2	0.988669	7.1134e-08	Kntc1	NONRATT030132.2
ENSRNOT00000031163	NONRATT003292.2	0.988627	7.22027e-08	Cdca2	NONRATT003292.2
ENSRNOT00000085880	NONRATT003289.2	0.988584	7.3294e-08	Kif20b	NONRATT003289.2
ENSRNOT00000063995	NONRATT028358.2	0.988582	7.3341e-08	Polq	NONRATT028358.2
ENSRNOT00000080498	NONRATT005180.2	0.988578	7.34587e-08	Ndc80	NONRATT005180.2
ENSRNOT00000036702	NONRATT008580.2	0.988576	7.35006e-08	Cenpt	NONRATT008580.2
ENSRNOT00000025629	NONRATT018485.2	0.988575	7.35369e-08	Plk1	NONRATT018485.2
ENSRNOT00000006235	NONRATT016343.2	0.988573	7.35823e-08	Nek2l1	NONRATT016343.2
ENSRNOT00000031163	NONRATT030132.2	0.988565	7.37832e-08	Cdca2	NONRATT030132.2
ENSRNOT00000031163	NONRATT008517.2	0.988562	7.38623e-08	Cdca2	NONRATT008517.2
ENSRNOT00000038176	NONRATT003292.2	0.988552	7.41229e-08	Mki67	NONRATT003292.2
ENSRNOT00000015065	NONRATT030261.2	0.988535	7.45483e-08	Blm	NONRATT030261.2
ENSRNOT00000021320	NONRATT023414.2	0.988533	7.46047e-08	Esco2	NONRATT023414.2
ENSRNOT00000051783	NONRATT030132.2	0.988531	7.46664e-08	Bub1	NONRATT030132.2
ENSRNOT00000012404	NONRATT018485.2	0.988524	7.48362e-08	Zwilch	NONRATT018485.2
ENSRNOT00000021156	NONRATT016047.2	0.988522	7.48969e-08	Ccna2	NONRATT016047.2
ENSRNOT00000083016	NONRATT008580.2	0.98851	7.52176e-08	Ncapd2	NONRATT008580.2
ENSRNOT00000029416	NONRATT033405.1	0.988506	7.5315e-08	Fbxo5	NONRATT033405.1
ENSRNOT00000010696	NONRATT015583.2	0.988487	7.5817e-08	Ccne2	NONRATT015583.2
ENSRNOT00000036151	NONRATT008570.2	0.988474	7.61584e-08	Cdc20	NONRATT008570.2
ENSRNOT00000020803	NONRATT030132.2	0.988467	7.6346e-08	Cdca3	NONRATT030132.2
ENSRNOT00000024301	NONRATT008570.2	0.988449	7.68044e-08	Gins4	NONRATT008570.2
ENSRNOT00000031163	NONRATT016343.2	0.988449	7.6824e-08	Cdca2	NONRATT016343.2
ENSRNOT00000022133	NONRATT005357.2	0.988368	7.89827e-08	Cep55	NONRATT005357.2
ENSRNOT00000084445	NONRATT008580.2	0.988349	7.94951e-08	Cenpn	NONRATT008580.2
ENSRNOT00000012038	NONRATT028358.2	0.98831	8.05735e-08	Kif14	NONRATT028358.2
ENSRNOT00000012038	NONRATT030261.2	0.988309	8.05854e-08	Kif14	NONRATT030261.2
ENSRNOT00000008492	NONRATT016343.2	0.9883	8.08252e-08	Aurkb	NONRATT016343.2
ENSRNOT00000064392	NONRATT008580.2	0.988286	8.12117e-08	Ccnf	NONRATT008580.2
ENSRNOT00000085344	NONRATT003292.2	0.988276	8.14964e-08	Top2a	NONRATT003292.2
ENSRNOT00000079726	NONRATT005357.2	0.988264	8.18371e-08	Kif11	NONRATT005357.2
ENSRNOT00000071107	NONRATT001466.2	0.988258	8.19863e-08	Chaf1a	NONRATT001466.2
ENSRNOT00000087132	NONRATT033407.1	0.988241	8.2481e-08	Rad51b	NONRATT033407.1
ENSRNOT00000065721	NONRATT033407.1	0.988225	8.29274e-08	Sgol1	NONRATT033407.1
ENSRNOT00000036702	NONRATT001466.2	0.98822	8.30505e-08	Cenpt	NONRATT001466.2
ENSRNOT00000015651	NONRATT033405.1	0.988218	8.311e-08	Spag5	NONRATT033405.1
ENSRNOT00000065593	NONRATT008580.2	0.98819	8.39101e-08	Prim1	NONRATT008580.2
ENSRNOT00000021308	NONRATT030132.2	0.988181	8.41726e-08	Fam83d	NONRATT030132.2
ENSRNOT00000008837	NONRATT016047.2	0.988175	8.43339e-08	Spc25	NONRATT016047.2
ENSRNOT00000015651	NONRATT008580.2	0.988161	8.47362e-08	Spag5	NONRATT008580.2
ENSRNOT00000021308	NONRATT027850.2	0.988151	8.50183e-08	Fam83d	NONRATT027850.2
ENSRNOT00000012038	NONRATT022152.2	0.988151	8.50188e-08	Kif14	NONRATT022152.2
ENSRNOT00000074058	NONRATT008517.2	0.988146	8.51498e-08	Rrm1	NONRATT008517.2
ENSRNOT00000020803	NONRATT018485.2	0.988133	8.5529e-08	Cdca3	NONRATT018485.2
ENSRNOT00000065677	NONRATT028358.2	0.988109	8.62265e-08	Cenpw	NONRATT028358.2
ENSRNOT00000005070	NONRATT027850.2	0.988106	8.63113e-08	Pttg1	NONRATT027850.2
ENSRNOT00000002487	NONRATT008580.2	0.988085	8.69114e-08	Rfc4	NONRATT008580.2
ENSRNOT00000086806	NONRATT005180.2	0.988068	8.74217e-08	Cdk1	NONRATT005180.2
ENSRNOT00000048293	NONRATT018485.2	0.988051	8.79262e-08	Cdca8	NONRATT018485.2
ENSRNOT00000012038	NONRATT003289.2	0.988048	8.79893e-08	Kif14	NONRATT003289.2
ENSRNOT00000016828	NONRATT016343.2	0.988044	8.81059e-08	Prim2	NONRATT016343.2
ENSRNOT00000002299	NONRATT008570.2	0.988042	8.81666e-08	Chaf1b	NONRATT008570.2
ENSRNOT00000017532	NONRATT008517.2	0.988041	8.82066e-08	Prc1	NONRATT008517.2
ENSRNOT00000017532	NONRATT008570.2	0.988032	8.84685e-08	Prc1	NONRATT008570.2
ENSRNOT00000083848	NONRATT001466.2	0.988029	8.85728e-08	Uhrf1	NONRATT001466.2
ENSRNOT00000018644	NONRATT030132.2	0.988026	8.86398e-08	Ndc80	NONRATT030132.2
ENSRNOT00000003650	NONRATT008570.2	0.988011	8.90948e-08	Nuf2	NONRATT008570.2
ENSRNOT00000077899	NONRATT033405.1	0.988009	8.91642e-08	Mastl	NONRATT033405.1
ENSRNOT00000065593	NONRATT016047.2	0.987987	8.98195e-08	Prim1	NONRATT016047.2
ENSRNOT00000012454	NONRATT018485.2	0.987971	9.02889e-08	Knstrn	NONRATT018485.2
ENSRNOT00000036702	NONRATT033405.1	0.987967	9.03939e-08	Cenpt	NONRATT033405.1
ENSRNOT00000043387	NONRATT008570.2	0.987952	9.08609e-08	Incenp	NONRATT008570.2
ENSRNOT00000087132	NONRATT030132.2	0.987948	9.09735e-08	Rad51b	NONRATT030132.2
ENSRNOT00000048293	NONRATT016047.2	0.987937	9.12963e-08	Cdca8	NONRATT016047.2
ENSRNOT00000066277	NONRATT001466.2	0.987931	9.14957e-08	Melk	NONRATT001466.2
ENSRNOT00000015065	NONRATT008580.2	0.98792	9.18319e-08	Blm	NONRATT008580.2
ENSRNOT00000025903	NONRATT033405.1	0.987916	9.19455e-08	Kif2c	NONRATT033405.1
ENSRNOT00000001444	NONRATT027850.2	0.987903	9.23313e-08	Rfc3	NONRATT027850.2
ENSRNOT00000017532	NONRATT003289.2	0.987901	9.23824e-08	Prc1	NONRATT003289.2
ENSRNOT00000039344	NONRATT016047.2	0.987899	9.24487e-08	Bora	NONRATT016047.2
ENSRNOT00000068520	NONRATT022152.2	0.987887	9.28307e-08	Cdc7	NONRATT022152.2
ENSRNOT00000010955	NONRATT008517.2	0.987878	9.31098e-08	Gins1	NONRATT008517.2
ENSRNOT00000016157	NONRATT018485.2	0.987862	9.35966e-08	Ncaph	NONRATT018485.2
ENSRNOT00000065721	NONRATT022152.2	0.98785	9.39583e-08	Sgol1	NONRATT022152.2
ENSRNOT00000032972	NONRATT005180.2	0.987835	9.4415e-08	Tacc3	NONRATT005180.2
ENSRNOT00000005857	NONRATT018439.2	0.987833	9.44765e-08	Fignl1	NONRATT018439.2
ENSRNOT00000010696	NONRATT028358.2	0.987829	9.46199e-08	Ccne2	NONRATT028358.2
ENSRNOT00000074058	NONRATT005180.2	0.987813	9.50901e-08	Rrm1	NONRATT005180.2
ENSRNOT00000020803	NONRATT008517.2	0.987791	9.58053e-08	Cdca3	NONRATT008517.2
ENSRNOT00000065349	NONRATT028358.2	0.987768	9.65247e-08	Kifc1	NONRATT028358.2
ENSRNOT00000003650	NONRATT003289.2	0.987767	9.65394e-08	Nuf2	NONRATT003289.2
ENSRNOT00000013216	NONRATT005357.2	0.987757	9.68669e-08	Ift80	NONRATT005357.2
ENSRNOT00000079726	NONRATT030132.2	0.987723	9.79281e-08	Kif11	NONRATT030132.2
ENSRNOT00000001444	NONRATT008570.2	0.987718	9.81068e-08	Rfc3	NONRATT008570.2
ENSRNOT00000083340	NONRATT015583.2	0.987713	9.82491e-08	Cdk5rap2	NONRATT015583.2
ENSRNOT00000020803	NONRATT003289.2	0.987708	9.83991e-08	Cdca3	NONRATT003289.2
ENSRNOT00000065721	NONRATT009960.2	0.987707	9.84382e-08	Sgol1	NONRATT009960.2
ENSRNOT00000089178	NONRATT018485.2	0.987704	9.85277e-08	Skp2	NONRATT018485.2
ENSRNOT00000015651	NONRATT005180.2	0.987701	9.86415e-08	Spag5	NONRATT005180.2
ENSRNOT00000082846	NONRATT009960.2	0.987695	9.88289e-08	Ccnb1	NONRATT009960.2
ENSRNOT00000010696	NONRATT008517.2	0.987692	9.89189e-08	Ccne2	NONRATT008517.2
ENSRNOT00000002487	NONRATT015583.2	0.987671	9.96053e-08	Rfc4	NONRATT015583.2
ENSRNOT00000005835	NONRATT016045.2	0.987669	9.9648e-08	Pole2	NONRATT016045.2
ENSRNOT00000000783	NONRATT018485.2	0.987663	9.98715e-08	Cdk1	NONRATT018485.2
ENSRNOT00000016828	NONRATT003289.2	0.987661	9.99147e-08	Prim2	NONRATT003289.2
ENSRNOT00000072027	NONRATT001466.2	0.987652	1.00225e-07	Cdc45	NONRATT001466.2
ENSRNOT00000005835	NONRATT001466.2	0.98764	1.00597e-07	Pole2	NONRATT001466.2
ENSRNOT00000021156	NONRATT008570.2	0.987633	1.00832e-07	Ccna2	NONRATT008570.2
ENSRNOT00000011226	NONRATT008570.2	0.98763	1.00937e-07	Stt3a	NONRATT008570.2
ENSRNOT00000084128	NONRATT016045.2	0.987619	1.01282e-07	Kif18b	NONRATT016045.2
ENSRNOT00000022133	NONRATT030132.2	0.9876	1.01908e-07	Cep55	NONRATT030132.2
ENSRNOT00000085880	NONRATT008570.2	0.987589	1.02274e-07	Kif20b	NONRATT008570.2
ENSRNOT00000010955	NONRATT030132.2	0.987566	1.03016e-07	Gins1	NONRATT030132.2
ENSRNOT00000035255	NONRATT028358.2	0.987551	1.0353e-07	Ncapg2	NONRATT028358.2
ENSRNOT00000035255	NONRATT015583.2	0.987546	1.03695e-07	Ncapg2	NONRATT015583.2
ENSRNOT00000002487	NONRATT005357.2	0.987542	1.03817e-07	Rfc4	NONRATT005357.2
ENSRNOT00000012088	NONRATT005180.2	0.98754	1.03882e-07	Cdkn2c	NONRATT005180.2
ENSRNOT00000039467	NONRATT016047.2	0.987518	1.04601e-07	Orc6	NONRATT016047.2
ENSRNOT00000063995	NONRATT022152.2	0.987497	1.0532e-07	Polq	NONRATT022152.2
ENSRNOT00000055102	NONRATT009960.2	0.987485	1.05707e-07	Aurka	NONRATT009960.2
ENSRNOT00000003650	TCONS_00010418	0.98748	1.05886e-07	Nuf2	TCONS_00010418
ENSRNOT00000032972	NONRATT003292.2	0.987468	1.06297e-07	Tacc3	NONRATT003292.2
ENSRNOT00000002510	NONRATT001466.2	0.987465	1.06413e-07	Mcm4	NONRATT001466.2
ENSRNOT00000083016	NONRATT003289.2	0.987464	1.06422e-07	Ncapd2	NONRATT003289.2
ENSRNOT00000080498	NONRATT030132.2	0.98746	1.06549e-07	Ndc80	NONRATT030132.2
ENSRNOT00000048293	NONRATT001466.2	0.987458	1.06644e-07	Cdca8	NONRATT001466.2
ENSRNOT00000091688	NONRATT012538.2	0.987431	1.07547e-07	Hist1h1b	NONRATT012538.2
ENSRNOT00000012454	NONRATT030132.2	0.987428	1.07661e-07	Knstrn	NONRATT030132.2
ENSRNOT00000083848	NONRATT005180.2	0.987407	1.08367e-07	Uhrf1	NONRATT005180.2
ENSRNOT00000063990	NONRATT018485.2	0.987386	1.09086e-07	Kntc1	NONRATT018485.2
ENSRNOT00000029416	NONRATT008580.2	0.987382	1.09236e-07	Fbxo5	NONRATT008580.2
ENSRNOT00000083111	NONRATT005180.2	0.987367	1.09766e-07	Brca1	NONRATT005180.2
ENSRNOT00000068520	NONRATT033407.1	0.987358	1.10063e-07	Cdc7	NONRATT033407.1
ENSRNOT00000074058	NONRATT030132.2	0.987352	1.10278e-07	Rrm1	NONRATT030132.2
ENSRNOT00000083340	NONRATT018485.2	0.987346	1.10484e-07	Cdk5rap2	NONRATT018485.2
ENSRNOT00000008837	NONRATT018439.2	0.987337	1.10785e-07	Spc25	NONRATT018439.2
ENSRNOT00000051065	NONRATT028358.2	0.987322	1.11322e-07	Hjurp	NONRATT028358.2
ENSRNOT00000021156	NONRATT003289.2	0.987303	1.11983e-07	Ccna2	NONRATT003289.2
ENSRNOT00000008837	NONRATT005357.2	0.987291	1.12394e-07	Spc25	NONRATT005357.2
ENSRNOT00000003650	NONRATT015583.2	0.987291	1.12396e-07	Nuf2	NONRATT015583.2
ENSRNOT00000021156	NONRATT008517.2	0.987269	1.13172e-07	Ccna2	NONRATT008517.2
ENSRNOT00000002085	NONRATT018485.2	0.987254	1.13701e-07	Hat1	NONRATT018485.2
ENSRNOT00000068623	NONRATT028358.2	0.987254	1.13732e-07	Nsl1	NONRATT028358.2
ENSRNOT00000025903	NONRATT003289.2	0.987251	1.13827e-07	Kif2c	NONRATT003289.2
ENSRNOT00000024301	NONRATT033405.1	0.987244	1.14074e-07	Gins4	NONRATT033405.1
ENSRNOT00000036151	NONRATT016343.2	0.987242	1.1413e-07	Cdc20	NONRATT016343.2
ENSRNOT00000008492	NONRATT027850.2	0.987216	1.15089e-07	Aurkb	NONRATT027850.2
ENSRNOT00000065677	NONRATT009960.2	0.987215	1.15091e-07	Cenpw	NONRATT009960.2
ENSRNOT00000010406	NONRATT016343.2	0.987195	1.15811e-07	Bub1b	NONRATT016343.2
ENSRNOT00000063995	NONRATT009960.2	0.987189	1.16037e-07	Polq	NONRATT009960.2
ENSRNOT00000089178	NONRATT005180.2	0.987188	1.16091e-07	Skp2	NONRATT005180.2
ENSRNOT00000079726	NONRATT016047.2	0.98717	1.16736e-07	Kif11	NONRATT016047.2
ENSRNOT00000009648	NONRATT018276.2	0.987166	1.16874e-07	Spdl1	NONRATT018276.2
ENSRNOT00000065593	NONRATT018485.2	0.987161	1.17046e-07	Prim1	NONRATT018485.2
ENSRNOT00000008492	NONRATT003292.2	0.987159	1.1712e-07	Aurkb	NONRATT003292.2
ENSRNOT00000015065	NONRATT018485.2	0.987144	1.17669e-07	Blm	NONRATT018485.2
ENSRNOT00000085344	NONRATT005357.2	0.98714	1.17829e-07	Top2a	NONRATT005357.2
ENSRNOT00000036151	NONRATT003289.2	0.987139	1.17846e-07	Cdc20	NONRATT003289.2
ENSRNOT00000021156	NONRATT015585.2	0.987133	1.18095e-07	Ccna2	NONRATT015585.2
ENSRNOT00000085176	NONRATT016047.2	0.987119	1.18579e-07	Kif18a	NONRATT016047.2
ENSRNOT00000015065	NONRATT030132.2	0.9871	1.19293e-07	Blm	NONRATT030132.2
ENSRNOT00000012038	NONRATT030132.2	0.987096	1.19419e-07	Kif14	NONRATT030132.2
ENSRNOT00000021156	NONRATT005357.2	0.987083	1.19902e-07	Ccna2	NONRATT005357.2
ENSRNOT00000034565	NONRATT030132.2	0.987075	1.20217e-07	Cenpe	NONRATT030132.2
ENSRNOT00000085344	NONRATT016343.2	0.987066	1.20543e-07	Top2a	NONRATT016343.2
ENSRNOT00000012454	NONRATT033405.1	0.987061	1.20735e-07	Knstrn	NONRATT033405.1
ENSRNOT00000063995	NONRATT003289.2	0.987045	1.21338e-07	Polq	NONRATT003289.2
ENSRNOT00000017314	NONRATT003289.2	0.987035	1.217e-07	Espl1	NONRATT003289.2
ENSRNOT00000052312	NONRATT030132.2	0.987016	1.22395e-07	Nusap1	NONRATT030132.2
ENSRNOT00000006235	NONRATT015583.2	0.986995	1.23203e-07	Nek2l1	NONRATT015583.2
ENSRNOT00000051064	NONRATT018439.2	0.986983	1.23666e-07	Cdc25b	NONRATT018439.2
ENSRNOT00000008837	NONRATT033407.1	0.986947	1.25029e-07	Spc25	NONRATT033407.1
ENSRNOT00000012512	NONRATT016047.2	0.986943	1.2516e-07	Cenpa	NONRATT016047.2
ENSRNOT00000008254	NONRATT028358.2	0.986934	1.25517e-07	Dsn1	NONRATT028358.2
ENSRNOT00000015651	NONRATT008570.2	0.986933	1.25552e-07	Spag5	NONRATT008570.2
ENSRNOT00000006235	NONRATT003289.2	0.986919	1.26117e-07	Nek2l1	NONRATT003289.2
ENSRNOT00000008837	NONRATT027850.2	0.986917	1.26157e-07	Spc25	NONRATT027850.2
ENSRNOT00000051064	NONRATT033407.1	0.986917	1.26191e-07	Cdc25b	NONRATT033407.1
ENSRNOT00000035255	NONRATT003292.2	0.986897	1.26931e-07	Ncapg2	NONRATT003292.2
ENSRNOT00000016157	NONRATT005180.2	0.986889	1.27267e-07	Ncaph	NONRATT005180.2
ENSRNOT00000072027	NONRATT008570.2	0.986888	1.27293e-07	Cdc45	NONRATT008570.2
ENSRNOT00000052312	NONRATT015583.2	0.986887	1.27332e-07	Nusap1	NONRATT015583.2
ENSRNOT00000010406	NONRATT005180.2	0.986861	1.28345e-07	Bub1b	NONRATT005180.2
ENSRNOT00000048293	NONRATT009960.2	0.98684	1.29152e-07	Cdca8	NONRATT009960.2
ENSRNOT00000085344	NONRATT027850.2	0.98684	1.29152e-07	Top2a	NONRATT027850.2
ENSRNOT00000002510	NONRATT008570.2	0.986834	1.2938e-07	Mcm4	NONRATT008570.2
ENSRNOT00000016828	NONRATT030132.2	0.98683	1.29569e-07	Prim2	NONRATT030132.2
ENSRNOT00000002487	NONRATT009960.2	0.986812	1.30255e-07	Rfc4	NONRATT009960.2
ENSRNOT00000012404	NONRATT027850.2	0.986787	1.3124e-07	Zwilch	NONRATT027850.2
ENSRNOT00000008837	NONRATT008570.2	0.986761	1.3227e-07	Spc25	NONRATT008570.2
ENSRNOT00000063995	NONRATT008570.2	0.986732	1.33447e-07	Polq	NONRATT008570.2
ENSRNOT00000002487	NONRATT003292.2	0.986727	1.33642e-07	Rfc4	NONRATT003292.2
ENSRNOT00000083340	NONRATT003292.2	0.986702	1.34656e-07	Cdk5rap2	NONRATT003292.2
ENSRNOT00000020803	NONRATT001466.2	0.986675	1.35751e-07	Cdca3	NONRATT001466.2
ENSRNOT00000032972	NONRATT027850.2	0.986658	1.36431e-07	Tacc3	NONRATT027850.2
ENSRNOT00000016828	NONRATT009960.2	0.986643	1.37019e-07	Prim2	NONRATT009960.2
ENSRNOT00000064392	NONRATT033407.1	0.986641	1.37112e-07	Ccnf	NONRATT033407.1
ENSRNOT00000036151	NONRATT033407.1	0.986636	1.37305e-07	Cdc20	NONRATT033407.1
ENSRNOT00000066277	NONRATT015583.2	0.986616	1.38133e-07	Melk	NONRATT015583.2
ENSRNOT00000021308	NONRATT033405.1	0.986605	1.38614e-07	Fam83d	NONRATT033405.1
ENSRNOT00000012512	NONRATT028358.2	0.986573	1.39902e-07	Cenpa	NONRATT028358.2
ENSRNOT00000010955	NONRATT015583.2	0.986549	1.40933e-07	Gins1	NONRATT015583.2
ENSRNOT00000082618	NONRATT016343.2	0.986548	1.40957e-07	Fancd2	NONRATT016343.2
ENSRNOT00000077823	NONRATT008570.2	0.986545	1.41091e-07	Incenp	NONRATT008570.2
ENSRNOT00000055102	NONRATT033407.1	0.986526	1.41868e-07	Aurka	NONRATT033407.1
ENSRNOT00000017635	NONRATT008580.2	0.986498	1.4306e-07	Hmgb2l1	NONRATT008580.2
ENSRNOT00000077899	NONRATT027850.2	0.986497	1.43113e-07	Mastl	NONRATT027850.2
ENSRNOT00000087132	NONRATT005180.2	0.98648	1.43841e-07	Rad51b	NONRATT005180.2
ENSRNOT00000085344	NONRATT033407.1	0.986474	1.44062e-07	Top2a	NONRATT033407.1
ENSRNOT00000039344	NONRATT030132.2	0.986449	1.45124e-07	Bora	NONRATT030132.2
ENSRNOT00000080119	NONRATT012480.2	0.986446	1.45282e-07	Hist1h2ak	NONRATT012480.2
ENSRNOT00000065349	NONRATT008517.2	0.986438	1.45605e-07	Kifc1	NONRATT008517.2
ENSRNOT00000035383	NONRATT027850.2	0.986421	1.46353e-07	Pmf1	NONRATT027850.2
ENSRNOT00000031163	NONRATT008570.2	0.986403	1.4712e-07	Cdca2	NONRATT008570.2
ENSRNOT00000039467	NONRATT018276.2	0.986398	1.47309e-07	Orc6	NONRATT018276.2
ENSRNOT00000004525	NONRATT030132.2	0.986394	1.47503e-07	Cenpf	NONRATT030132.2
ENSRNOT00000010025	NONRATT033407.1	0.986337	1.49993e-07	Xrcc2	NONRATT033407.1
ENSRNOT00000025629	NONRATT008517.2	0.986333	1.50153e-07	Plk1	NONRATT008517.2
ENSRNOT00000016828	NONRATT008580.2	0.986327	1.50419e-07	Prim2	NONRATT008580.2
ENSRNOT00000019799	NONRATT005180.2	0.986324	1.50531e-07	Lig1	NONRATT005180.2
ENSRNOT00000002085	NONRATT009960.2	0.986317	1.5087e-07	Hat1	NONRATT009960.2
ENSRNOT00000006235	NONRATT030132.2	0.986302	1.5153e-07	Nek2l1	NONRATT030132.2
ENSRNOT00000071107	NONRATT008570.2	0.986284	1.52288e-07	Chaf1a	NONRATT008570.2
ENSRNOT00000001825	NONRATT008570.2	0.98625	1.53814e-07	Mcm7	NONRATT008570.2
ENSRNOT00000010955	NONRATT001466.2	0.986225	1.54938e-07	Gins1	NONRATT001466.2
ENSRNOT00000028109	NONRATT008570.2	0.986209	1.55641e-07	Brca1	NONRATT008570.2
ENSRNOT00000024301	NONRATT005180.2	0.9862	1.56045e-07	Gins4	NONRATT005180.2
ENSRNOT00000065677	NONRATT018439.2	0.986192	1.56415e-07	Cenpw	NONRATT018439.2
ENSRNOT00000025629	NONRATT016047.2	0.98619	1.56521e-07	Plk1	NONRATT016047.2
ENSRNOT00000091016	NONRATT016045.2	0.986174	1.57217e-07	Aurkb	NONRATT016045.2
ENSRNOT00000010406	NONRATT008517.2	0.986165	1.57631e-07	Bub1b	NONRATT008517.2
ENSRNOT00000012512	NONRATT001466.2	0.986164	1.57704e-07	Cenpa	NONRATT001466.2
ENSRNOT00000028898	NONRATT005180.2	0.986147	1.58443e-07	Mcm8	NONRATT005180.2
ENSRNOT00000072493	NONRATT028358.2	0.98614	1.58786e-07	Cdca5	NONRATT028358.2
ENSRNOT00000051783	NONRATT003292.2	0.986113	1.59992e-07	Bub1	NONRATT003292.2
ENSRNOT00000052312	NONRATT008517.2	0.986088	1.61144e-07	Nusap1	NONRATT008517.2
ENSRNOT00000024301	NONRATT001466.2	0.986083	1.61404e-07	Gins4	NONRATT001466.2
ENSRNOT00000002085	NONRATT005357.2	0.986073	1.61856e-07	Hat1	NONRATT005357.2
ENSRNOT00000087132	NONRATT033405.1	0.986062	1.62346e-07	Rad51b	NONRATT033405.1
ENSRNOT00000051064	NONRATT005357.2	0.986056	1.6266e-07	Cdc25b	NONRATT005357.2
ENSRNOT00000072387	NONRATT008580.2	0.986051	1.62864e-07	Birc5	NONRATT008580.2
ENSRNOT00000015065	NONRATT008570.2	0.98604	1.63396e-07	Blm	NONRATT008570.2
ENSRNOT00000091551	NONRATT015585.2	0.986039	1.63423e-07	Rrm2	NONRATT015585.2
ENSRNOT00000065349	NONRATT027850.2	0.98601	1.6479e-07	Kifc1	NONRATT027850.2
ENSRNOT00000076451	NONRATT016343.2	0.985992	1.6566e-07	Esco2	NONRATT016343.2
ENSRNOT00000028109	NONRATT001466.2	0.985991	1.6569e-07	Brca1	NONRATT001466.2
ENSRNOT00000000783	NONRATT015585.2	0.985986	1.65903e-07	Cdk1	NONRATT015585.2
ENSRNOT00000077899	NONRATT029356.2	0.98598	1.662e-07	Mastl	NONRATT029356.2
ENSRNOT00000022658	NONRATT009960.2	0.98597	1.66666e-07	Fanca	NONRATT009960.2
ENSRNOT00000021156	NONRATT016343.2	0.985948	1.67703e-07	Ccna2	NONRATT016343.2
ENSRNOT00000080498	NONRATT014982.2	0.985939	1.68159e-07	Ndc80	NONRATT014982.2
ENSRNOT00000068623	NONRATT008580.2	0.985938	1.6818e-07	Nsl1	NONRATT008580.2
ENSRNOT00000012038	NONRATT033405.1	0.985938	1.68214e-07	Kif14	NONRATT033405.1
ENSRNOT00000022133	NONRATT018439.2	0.985933	1.68417e-07	Cep55	NONRATT018439.2
ENSRNOT00000035255	NONRATT016343.2	0.98589	1.70501e-07	Ncapg2	NONRATT016343.2
ENSRNOT00000010696	NONRATT018485.2	0.985876	1.71156e-07	Ccne2	NONRATT018485.2
ENSRNOT00000083340	NONRATT005180.2	0.985865	1.71722e-07	Cdk5rap2	NONRATT005180.2
ENSRNOT00000065677	NONRATT027850.2	0.985852	1.72345e-07	Cenpw	NONRATT027850.2
ENSRNOT00000068520	NONRATT005180.2	0.985826	1.73602e-07	Cdc7	NONRATT005180.2
ENSRNOT00000028898	NONRATT008570.2	0.985825	1.73647e-07	Mcm8	NONRATT008570.2
ENSRNOT00000065593	NONRATT005357.2	0.985819	1.73956e-07	Prim1	NONRATT005357.2
ENSRNOT00000022658	NONRATT016045.2	0.985805	1.74626e-07	Fanca	NONRATT016045.2
ENSRNOT00000010955	NONRATT009960.2	0.985803	1.74704e-07	Gins1	NONRATT009960.2
ENSRNOT00000036151	NONRATT016047.2	0.985803	1.7474e-07	Cdc20	NONRATT016047.2
ENSRNOT00000047420	NONRATT008580.2	0.985801	1.748e-07	Palb2	NONRATT008580.2
ENSRNOT00000089178	NONRATT008580.2	0.9858	1.74887e-07	Skp2	NONRATT008580.2
ENSRNOT00000020803	NONRATT009960.2	0.985799	1.74908e-07	Cdca3	NONRATT009960.2
ENSRNOT00000025629	NONRATT033405.1	0.985796	1.75054e-07	Plk1	NONRATT033405.1
ENSRNOT00000084445	NONRATT022152.2	0.985782	1.75742e-07	Cenpn	NONRATT022152.2
ENSRNOT00000016828	NONRATT028358.2	0.98578	1.75837e-07	Prim2	NONRATT028358.2
ENSRNOT00000003650	NONRATT033405.1	0.985779	1.75909e-07	Nuf2	NONRATT033405.1
ENSRNOT00000028109	NONRATT030132.2	0.985775	1.76083e-07	Brca1	NONRATT030132.2
ENSRNOT00000080498	NONRATT028358.2	0.98576	1.76862e-07	Ndc80	NONRATT028358.2
ENSRNOT00000052312	NONRATT033405.1	0.985752	1.77225e-07	Nusap1	NONRATT033405.1
ENSRNOT00000065593	NONRATT033407.1	0.985752	1.77233e-07	Prim1	NONRATT033407.1
ENSRNOT00000010955	NONRATT003289.2	0.985748	1.77448e-07	Gins1	NONRATT003289.2
ENSRNOT00000036702	NONRATT003289.2	0.985747	1.77463e-07	Cenpt	NONRATT003289.2
ENSRNOT00000063990	NONRATT016343.2	0.98573	1.78336e-07	Kntc1	NONRATT016343.2
ENSRNOT00000052312	NONRATT003292.2	0.985727	1.78467e-07	Nusap1	NONRATT003292.2
ENSRNOT00000006964	NONRATT008517.2	0.985722	1.78702e-07	Asf1b	NONRATT008517.2
ENSRNOT00000085176	NONRATT008570.2	0.9857	1.79841e-07	Kif18a	NONRATT008570.2
ENSRNOT00000008254	NONRATT008580.2	0.985673	1.81171e-07	Dsn1	NONRATT008580.2
ENSRNOT00000008492	NONRATT030132.2	0.985672	1.81207e-07	Aurkb	NONRATT030132.2
ENSRNOT00000084445	NONRATT008517.2	0.985659	1.81879e-07	Cenpn	NONRATT008517.2
ENSRNOT00000028898	NONRATT016045.2	0.985659	1.81885e-07	Mcm8	NONRATT016045.2
ENSRNOT00000017314	NONRATT009960.2	0.985646	1.82524e-07	Espl1	NONRATT009960.2
ENSRNOT00000017549	NONRATT024911.2	0.985646	1.82541e-07	Rpa2	NONRATT024911.2
ENSRNOT00000086806	NONRATT018485.2	0.985644	1.8264e-07	Cdk1	NONRATT018485.2
ENSRNOT00000065677	NONRATT003289.2	0.985625	1.83617e-07	Cenpw	NONRATT003289.2
ENSRNOT00000051065	NONRATT030261.2	0.985621	1.83818e-07	Hjurp	NONRATT030261.2
ENSRNOT00000025903	NONRATT016343.2	0.985617	1.84022e-07	Kif2c	NONRATT016343.2
ENSRNOT00000025629	NONRATT016343.2	0.985617	1.84038e-07	Plk1	NONRATT016343.2
ENSRNOT00000063990	NONRATT022152.2	0.985602	1.8478e-07	Kntc1	NONRATT022152.2
ENSRNOT00000022658	NONRATT003289.2	0.985596	1.85072e-07	Fanca	NONRATT003289.2
ENSRNOT00000012404	NONRATT028358.2	0.985588	1.8549e-07	Zwilch	NONRATT028358.2
ENSRNOT00000036702	NONRATT009960.2	0.985583	1.85737e-07	Cenpt	NONRATT009960.2
ENSRNOT00000077899	NONRATT015583.2	0.985552	1.87336e-07	Mastl	NONRATT015583.2
ENSRNOT00000087132	NONRATT015583.2	0.985546	1.87653e-07	Rad51b	NONRATT015583.2
ENSRNOT00000084445	NONRATT033407.1	0.985545	1.87702e-07	Cenpn	NONRATT033407.1
ENSRNOT00000051783	NONRATT027850.2	0.985527	1.88624e-07	Bub1	NONRATT027850.2
ENSRNOT00000016157	NONRATT033407.1	0.985516	1.89233e-07	Ncaph	NONRATT033407.1
ENSRNOT00000012088	NONRATT028358.2	0.985512	1.89412e-07	Cdkn2c	NONRATT028358.2
ENSRNOT00000015065	NONRATT005180.2	0.98551	1.89507e-07	Blm	NONRATT005180.2
ENSRNOT00000065593	NONRATT016343.2	0.985505	1.89799e-07	Prim1	NONRATT016343.2
ENSRNOT00000051064	NONRATT008570.2	0.985504	1.8986e-07	Cdc25b	NONRATT008570.2
ENSRNOT00000051064	NONRATT033405.1	0.985496	1.90245e-07	Cdc25b	NONRATT033405.1
ENSRNOT00000001444	NONRATT008580.2	0.985457	1.92291e-07	Rfc3	NONRATT008580.2
ENSRNOT00000063990	NONRATT008570.2	0.985454	1.92488e-07	Kntc1	NONRATT008570.2
ENSRNOT00000063990	NONRATT008580.2	0.985433	1.93595e-07	Kntc1	NONRATT008580.2
ENSRNOT00000018644	NONRATT016047.2	0.985396	1.95528e-07	Ndc80	NONRATT016047.2
ENSRNOT00000017532	NONRATT033407.1	0.98539	1.95837e-07	Prc1	NONRATT033407.1
ENSRNOT00000010144	NONRATT006811.2	0.98539	1.95879e-07	Mis12	NONRATT006811.2
ENSRNOT00000064392	NONRATT033405.1	0.985378	1.96526e-07	Ccnf	NONRATT033405.1
ENSRNOT00000028898	NONRATT028358.2	0.985374	1.96706e-07	Mcm8	NONRATT028358.2
ENSRNOT00000036702	NONRATT030261.2	0.985363	1.97317e-07	Cenpt	NONRATT030261.2
ENSRNOT00000036702	NONRATT016343.2	0.985346	1.98245e-07	Cenpt	NONRATT016343.2
ENSRNOT00000028109	NONRATT008580.2	0.985344	1.98303e-07	Brca1	NONRATT008580.2
ENSRNOT00000032972	NONRATT005357.2	0.98534	1.9852e-07	Tacc3	NONRATT005357.2
ENSRNOT00000076451	NONRATT008570.2	0.98534	1.98565e-07	Esco2	NONRATT008570.2
ENSRNOT00000064392	NONRATT005357.2	0.985328	1.99192e-07	Ccnf	NONRATT005357.2
ENSRNOT00000010406	NONRATT033405.1	0.985323	1.99441e-07	Bub1b	NONRATT033405.1
ENSRNOT00000015651	NONRATT030261.2	0.985308	2.00248e-07	Spag5	NONRATT030261.2
ENSRNOT00000005857	NONRATT008580.2	0.985296	2.00925e-07	Fignl1	NONRATT008580.2
ENSRNOT00000016828	NONRATT033407.1	0.985284	2.01578e-07	Prim2	NONRATT033407.1
ENSRNOT00000047420	NONRATT008570.2	0.985269	2.02413e-07	Palb2	NONRATT008570.2
ENSRNOT00000022658	NONRATT030261.2	0.985251	2.03361e-07	Fanca	NONRATT030261.2
ENSRNOT00000028898	NONRATT016343.2	0.985241	2.03914e-07	Mcm8	NONRATT016343.2
ENSRNOT00000012088	NONRATT015583.2	0.985234	2.04318e-07	Cdkn2c	NONRATT015583.2
ENSRNOT00000007285	NONRATT016343.2	0.98521	2.05619e-07	Mad2l1	NONRATT016343.2
ENSRNOT00000083111	NONRATT016045.2	0.985199	2.06269e-07	Brca1	NONRATT016045.2
ENSRNOT00000066277	NONRATT016343.2	0.985193	2.06575e-07	Melk	NONRATT016343.2
ENSRNOT00000065895	NONRATT004419.2	0.985191	2.06686e-07	Myh10	NONRATT004419.2
ENSRNOT00000028406	NONRATT032352.1	0.985182	2.07217e-07	Pola2	NONRATT032352.1
ENSRNOT00000038176	NONRATT005180.2	0.985175	2.07616e-07	Mki67	NONRATT005180.2
ENSRNOT00000051783	NONRATT015583.2	0.985156	2.08654e-07	Bub1	NONRATT015583.2
ENSRNOT00000008837	NONRATT033405.1	0.985155	2.08737e-07	Spc25	NONRATT033405.1
ENSRNOT00000079726	NONRATT008517.2	0.985149	2.09073e-07	Kif11	NONRATT008517.2
ENSRNOT00000017532	NONRATT003292.2	0.98513	2.10089e-07	Prc1	NONRATT003292.2
ENSRNOT00000012404	NONRATT008570.2	0.985127	2.1029e-07	Zwilch	NONRATT008570.2
ENSRNOT00000072493	NONRATT005180.2	0.985118	2.10762e-07	Cdca5	NONRATT005180.2
ENSRNOT00000010696	NONRATT030132.2	0.98511	2.1122e-07	Ccne2	NONRATT030132.2
ENSRNOT00000082846	NONRATT003289.2	0.985099	2.11861e-07	Ccnb1	NONRATT003289.2
ENSRNOT00000007285	NONRATT015583.2	0.985099	2.11882e-07	Mad2l1	NONRATT015583.2
ENSRNOT00000066277	NONRATT016045.2	0.985098	2.11898e-07	Melk	NONRATT016045.2
ENSRNOT00000048293	NONRATT016343.2	0.985094	2.12123e-07	Cdca8	NONRATT016343.2
ENSRNOT00000048293	NONRATT030132.2	0.985094	2.12164e-07	Cdca8	NONRATT030132.2
ENSRNOT00000035255	NONRATT003289.2	0.985092	2.12232e-07	Ncapg2	NONRATT003289.2
ENSRNOT00000089178	NONRATT003292.2	0.985057	2.14277e-07	Skp2	NONRATT003292.2
ENSRNOT00000091016	NONRATT008570.2	0.985049	2.14707e-07	Aurkb	NONRATT008570.2
ENSRNOT00000043387	NONRATT001466.2	0.985021	2.16284e-07	Incenp	NONRATT001466.2
ENSRNOT00000036151	NONRATT005357.2	0.985016	2.16589e-07	Cdc20	NONRATT005357.2
ENSRNOT00000038176	TCONS_00021565	0.985003	2.17344e-07	Mki67	TCONS_00021565
ENSRNOT00000074148	NONRATT009960.2	0.985001	2.17487e-07	Lin9	NONRATT009960.2
ENSRNOT00000002085	NONRATT016045.2	0.984992	2.17959e-07	Hat1	NONRATT016045.2
ENSRNOT00000021308	NONRATT018485.2	0.984985	2.18417e-07	Fam83d	NONRATT018485.2
ENSRNOT00000036098	NONRATT008580.2	0.984958	2.1994e-07	Ska2	NONRATT008580.2
ENSRNOT00000019799	NONRATT001466.2	0.984954	2.20188e-07	Lig1	NONRATT001466.2
ENSRNOT00000008492	NONRATT008570.2	0.984946	2.20649e-07	Aurkb	NONRATT008570.2
ENSRNOT00000002066	NONRATT027850.2	0.984942	2.20879e-07	Cdca7	NONRATT027850.2
ENSRNOT00000082846	NONRATT033405.1	0.984942	2.20879e-07	Ccnb1	NONRATT033405.1
ENSRNOT00000006964	NONRATT028358.2	0.984939	2.21059e-07	Asf1b	NONRATT028358.2
ENSRNOT00000079726	NONRATT003292.2	0.984937	2.21171e-07	Kif11	NONRATT003292.2
ENSRNOT00000038176	NONRATT015583.2	0.98493	2.21568e-07	Mki67	NONRATT015583.2
ENSRNOT00000046798	NONRATT030261.2	0.984929	2.21636e-07	Mdc1	NONRATT030261.2
ENSRNOT00000080119	NONRATT012479.2	0.984929	2.21675e-07	Hist1h2ak	NONRATT012479.2
ENSRNOT00000076451	NONRATT003289.2	0.984923	2.22025e-07	Esco2	NONRATT003289.2
ENSRNOT00000025629	NONRATT005180.2	0.984912	2.22649e-07	Plk1	NONRATT005180.2
ENSRNOT00000025629	NONRATT001466.2	0.984896	2.23563e-07	Plk1	NONRATT001466.2
ENSRNOT00000025903	NONRATT018485.2	0.984863	2.25551e-07	Kif2c	NONRATT018485.2
ENSRNOT00000047420	NONRATT005180.2	0.984861	2.2567e-07	Palb2	NONRATT005180.2
ENSRNOT00000085344	NONRATT015585.2	0.984844	2.267e-07	Top2a	NONRATT015585.2
ENSRNOT00000072027	NONRATT005180.2	0.984818	2.28226e-07	Cdc45	NONRATT005180.2
ENSRNOT00000074058	NONRATT033405.1	0.984807	2.28887e-07	Rrm1	NONRATT033405.1
ENSRNOT00000015065	NONRATT022152.2	0.984803	2.29124e-07	Blm	NONRATT022152.2
ENSRNOT00000021308	NONRATT029356.2	0.984803	2.29134e-07	Fam83d	NONRATT029356.2
ENSRNOT00000017314	NONRATT008570.2	0.984779	2.30555e-07	Espl1	NONRATT008570.2
ENSRNOT00000072387	NONRATT015585.2	0.984776	2.30766e-07	Birc5	NONRATT015585.2
ENSRNOT00000037444	NONRATT018485.2	0.984761	2.31672e-07	Mis18a	NONRATT018485.2
ENSRNOT00000051064	NONRATT016047.2	0.984757	2.31919e-07	Cdc25b	NONRATT016047.2
ENSRNOT00000010406	NONRATT015583.2	0.984755	2.32021e-07	Bub1b	NONRATT015583.2
ENSRNOT00000051783	TCONS_00010418	0.984722	2.3402e-07	Bub1	TCONS_00010418
ENSRNOT00000028898	NONRATT033407.1	0.984713	2.34574e-07	Mcm8	NONRATT033407.1
ENSRNOT00000024301	NONRATT008580.2	0.984701	2.35327e-07	Gins4	NONRATT008580.2
ENSRNOT00000012404	NONRATT016343.2	0.984694	2.35762e-07	Zwilch	NONRATT016343.2
ENSRNOT00000025903	NONRATT009960.2	0.984692	2.35886e-07	Kif2c	NONRATT009960.2
ENSRNOT00000074058	NONRATT001466.2	0.984667	2.37365e-07	Rrm1	NONRATT001466.2
ENSRNOT00000010025	NONRATT009960.2	0.984657	2.38017e-07	Xrcc2	NONRATT009960.2
ENSRNOT00000016828	NONRATT022152.2	0.98465	2.38444e-07	Prim2	NONRATT022152.2
ENSRNOT00000087132	NONRATT018485.2	0.98463	2.39667e-07	Rad51b	NONRATT018485.2
ENSRNOT00000008254	NONRATT008570.2	0.98463	2.39706e-07	Dsn1	NONRATT008570.2
ENSRNOT00000012038	NONRATT016343.2	0.984621	2.4026e-07	Kif14	NONRATT016343.2
ENSRNOT00000038176	NONRATT008570.2	0.984613	2.40712e-07	Mki67	NONRATT008570.2
ENSRNOT00000036702	NONRATT022152.2	0.984605	2.4125e-07	Cenpt	NONRATT022152.2
ENSRNOT00000025903	NONRATT030132.2	0.984593	2.41985e-07	Kif2c	NONRATT030132.2
ENSRNOT00000029416	NONRATT033407.1	0.984588	2.42324e-07	Fbxo5	NONRATT033407.1
ENSRNOT00000072493	NONRATT030132.2	0.984578	2.42932e-07	Cdca5	NONRATT030132.2
ENSRNOT00000083151	NONRATT033407.1	0.984576	2.43074e-07	Ttk	NONRATT033407.1
ENSRNOT00000028898	NONRATT018485.2	0.984572	2.43319e-07	Mcm8	NONRATT018485.2
ENSRNOT00000004525	NONRATT008570.2	0.984534	2.45673e-07	Cenpf	NONRATT008570.2
ENSRNOT00000025629	NONRATT003292.2	0.984525	2.46249e-07	Plk1	NONRATT003292.2
ENSRNOT00000048293	NONRATT029356.2	0.984523	2.46366e-07	Cdca8	NONRATT029356.2
ENSRNOT00000039344	NONRATT028358.2	0.984523	2.46379e-07	Bora	NONRATT028358.2
ENSRNOT00000011226	NONRATT001466.2	0.984522	2.46459e-07	Stt3a	NONRATT001466.2
ENSRNOT00000008149	NONRATT028358.2	0.984517	2.46776e-07	Ezh2	NONRATT028358.2
ENSRNOT00000065677	NONRATT018485.2	0.984498	2.48005e-07	Cenpw	NONRATT018485.2
ENSRNOT00000019799	NONRATT028358.2	0.984459	2.50455e-07	Lig1	NONRATT028358.2
ENSRNOT00000035383	NONRATT008570.2	0.984455	2.50715e-07	Pmf1	NONRATT008570.2
ENSRNOT00000026797	NONRATT012479.2	0.984449	2.51115e-07	Pold1	NONRATT012479.2
ENSRNOT00000005835	NONRATT030132.2	0.984428	2.52475e-07	Pole2	NONRATT030132.2
ENSRNOT00000065593	NONRATT008570.2	0.984425	2.52651e-07	Prim1	NONRATT008570.2
ENSRNOT00000065593	NONRATT028358.2	0.984391	2.54881e-07	Prim1	NONRATT028358.2
ENSRNOT00000074058	NONRATT015583.2	0.984383	2.55401e-07	Rrm1	NONRATT015583.2
ENSRNOT00000020803	NONRATT005180.2	0.984381	2.55521e-07	Cdca3	NONRATT005180.2
ENSRNOT00000080119	NONRATT013044.2	0.98437	2.56214e-07	Hist1h2ak	NONRATT013044.2
ENSRNOT00000025903	NONRATT029356.2	0.98437	2.56238e-07	Kif2c	NONRATT029356.2
ENSRNOT00000035255	NONRATT008517.2	0.984368	2.56354e-07	Ncapg2	NONRATT008517.2
ENSRNOT00000010406	NONRATT022152.2	0.984363	2.5668e-07	Bub1b	NONRATT022152.2
ENSRNOT00000005835	NONRATT003289.2	0.984322	2.59377e-07	Pole2	NONRATT003289.2
ENSRNOT00000008837	NONRATT030132.2	0.984308	2.60304e-07	Spc25	NONRATT030132.2
ENSRNOT00000021308	NONRATT009960.2	0.984302	2.60718e-07	Fam83d	NONRATT009960.2
ENSRNOT00000087132	NONRATT016045.2	0.9843	2.60843e-07	Rad51b	NONRATT016045.2
ENSRNOT00000077823	NONRATT016045.2	0.9843	2.60853e-07	Incenp	NONRATT016045.2
ENSRNOT00000006235	NONRATT003292.2	0.984292	2.6134e-07	Nek2l1	NONRATT003292.2
ENSRNOT00000024301	NONRATT016343.2	0.984285	2.61833e-07	Gins4	NONRATT016343.2
ENSRNOT00000066277	NONRATT030261.2	0.984272	2.62663e-07	Melk	NONRATT030261.2
ENSRNOT00000074058	NONRATT003292.2	0.98426	2.63498e-07	Rrm1	NONRATT003292.2
ENSRNOT00000028898	NONRATT008580.2	0.984254	2.63915e-07	Mcm8	NONRATT008580.2
ENSRNOT00000083151	NONRATT022152.2	0.984224	2.659e-07	Ttk	NONRATT022152.2
ENSRNOT00000015065	NONRATT016045.2	0.984221	2.66114e-07	Blm	NONRATT016045.2
ENSRNOT00000084271	NONRATT008570.2	0.984217	2.66392e-07	Mcm5	NONRATT008570.2
ENSRNOT00000012512	NONRATT018485.2	0.984213	2.66619e-07	Cenpa	NONRATT018485.2
ENSRNOT00000029416	NONRATT016343.2	0.984211	2.66741e-07	Fbxo5	NONRATT016343.2
ENSRNOT00000066277	TCONS_00021565	0.98421	2.66868e-07	Melk	TCONS_00021565
ENSRNOT00000085344	NONRATT008570.2	0.984209	2.66918e-07	Top2a	NONRATT008570.2
ENSRNOT00000024301	NONRATT029356.2	0.984189	2.68291e-07	Gins4	NONRATT029356.2
ENSRNOT00000051783	NONRATT005180.2	0.984187	2.68367e-07	Bub1	NONRATT005180.2
ENSRNOT00000082618	NONRATT016045.2	0.984167	2.69764e-07	Fancd2	NONRATT016045.2
ENSRNOT00000083848	NONRATT008570.2	0.98415	2.70923e-07	Uhrf1	NONRATT008570.2
ENSRNOT00000017635	NONRATT003289.2	0.984148	2.71051e-07	Hmgb2l1	NONRATT003289.2
ENSRNOT00000074058	NONRATT016047.2	0.984141	2.71535e-07	Rrm1	NONRATT016047.2
ENSRNOT00000036098	NONRATT016047.2	0.98413	2.72252e-07	Ska2	NONRATT016047.2
ENSRNOT00000055102	NONRATT033405.1	0.984124	2.72655e-07	Aurka	NONRATT033405.1
ENSRNOT00000007285	NONRATT009960.2	0.984124	2.72663e-07	Mad2l1	NONRATT009960.2
ENSRNOT00000083111	NONRATT008580.2	0.984109	2.73722e-07	Brca1	NONRATT008580.2
ENSRNOT00000063990	NONRATT033405.1	0.984094	2.74761e-07	Kntc1	NONRATT033405.1
ENSRNOT00000005835	NONRATT008517.2	0.984075	2.76057e-07	Pole2	NONRATT008517.2
ENSRNOT00000083111	NONRATT030261.2	0.98404	2.7848e-07	Brca1	NONRATT030261.2
ENSRNOT00000072493	NONRATT015583.2	0.984037	2.78657e-07	Cdca5	NONRATT015583.2
ENSRNOT00000006235	NONRATT005180.2	0.984019	2.79919e-07	Nek2l1	NONRATT005180.2
ENSRNOT00000034565	NONRATT008570.2	0.984005	2.80878e-07	Cenpe	NONRATT008570.2
ENSRNOT00000016157	NONRATT016045.2	0.984	2.81217e-07	Ncaph	NONRATT016045.2
ENSRNOT00000012038	NONRATT005180.2	0.983991	2.81899e-07	Kif14	NONRATT005180.2
ENSRNOT00000076451	NONRATT005357.2	0.983983	2.82471e-07	Esco2	NONRATT005357.2
ENSRNOT00000083016	NONRATT016045.2	0.983979	2.82723e-07	Ncapd2	NONRATT016045.2
ENSRNOT00000036702	NONRATT018485.2	0.983976	2.82922e-07	Cenpt	NONRATT018485.2
ENSRNOT00000001444	NONRATT018439.2	0.983976	2.82928e-07	Rfc3	NONRATT018439.2
ENSRNOT00000082846	NONRATT008517.2	0.983972	2.83241e-07	Ccnb1	NONRATT008517.2
ENSRNOT00000082618	NONRATT022152.2	0.983967	2.83546e-07	Fancd2	NONRATT022152.2
ENSRNOT00000007285	NONRATT028358.2	0.983955	2.84441e-07	Mad2l1	NONRATT028358.2
ENSRNOT00000010696	NONRATT008570.2	0.983942	2.85311e-07	Ccne2	NONRATT008570.2
ENSRNOT00000034565	NONRATT005357.2	0.983939	2.85554e-07	Cenpe	NONRATT005357.2
ENSRNOT00000066277	NONRATT033405.1	0.983932	2.86034e-07	Melk	NONRATT033405.1
ENSRNOT00000051612	NONRATT018552.2	0.983919	2.86967e-07	Ttk	NONRATT018552.2
ENSRNOT00000068623	NONRATT033405.1	0.983904	2.88037e-07	Nsl1	NONRATT033405.1
ENSRNOT00000048293	NONRATT033405.1	0.983896	2.88633e-07	Cdca8	NONRATT033405.1
ENSRNOT00000003650	NONRATT005357.2	0.983884	2.89482e-07	Nuf2	NONRATT005357.2
ENSRNOT00000025389	NONRATT033405.1	0.983884	2.89483e-07	Gmnn	NONRATT033405.1
ENSRNOT00000032972	NONRATT033405.1	0.983859	2.91248e-07	Tacc3	NONRATT033405.1
ENSRNOT00000019234	NONRATT015585.2	0.983817	2.94266e-07	Cks2	NONRATT015585.2
ENSRNOT00000020803	NONRATT033407.1	0.983809	2.94847e-07	Cdca3	NONRATT033407.1
ENSRNOT00000012404	NONRATT029356.2	0.98379	2.96254e-07	Zwilch	NONRATT029356.2
ENSRNOT00000017532	NONRATT015585.2	0.983771	2.97593e-07	Prc1	NONRATT015585.2
ENSRNOT00000035255	NONRATT030132.2	0.983769	2.97735e-07	Ncapg2	NONRATT030132.2
ENSRNOT00000066277	NONRATT008517.2	0.983766	2.9796e-07	Melk	NONRATT008517.2
ENSRNOT00000004525	NONRATT005357.2	0.98373	3.00624e-07	Cenpf	NONRATT005357.2
ENSRNOT00000020803	NONRATT029356.2	0.98372	3.01337e-07	Cdca3	NONRATT029356.2
ENSRNOT00000002299	NONRATT005180.2	0.983711	3.02042e-07	Chaf1b	NONRATT005180.2
ENSRNOT00000012038	NONRATT008570.2	0.983706	3.02358e-07	Kif14	NONRATT008570.2
ENSRNOT00000063995	NONRATT001466.2	0.983698	3.02952e-07	Polq	NONRATT001466.2
ENSRNOT00000032723	NONRATT018439.2	0.983698	3.03e-07	Ska3	NONRATT018439.2
ENSRNOT00000003650	NONRATT016047.2	0.983695	3.0322e-07	Nuf2	NONRATT016047.2
ENSRNOT00000084128	NONRATT005180.2	0.983685	3.03926e-07	Kif18b	NONRATT005180.2
ENSRNOT00000068623	NONRATT027850.2	0.983665	3.05447e-07	Nsl1	NONRATT027850.2
ENSRNOT00000016157	NONRATT033405.1	0.983659	3.05904e-07	Ncaph	NONRATT033405.1
ENSRNOT00000010025	NONRATT022152.2	0.983644	3.07006e-07	Xrcc2	NONRATT022152.2
ENSRNOT00000091016	NONRATT030261.2	0.983643	3.07056e-07	Aurkb	NONRATT030261.2
ENSRNOT00000025389	NONRATT028358.2	0.98364	3.073e-07	Gmnn	NONRATT028358.2
ENSRNOT00000008254	NONRATT003289.2	0.98364	3.07321e-07	Dsn1	NONRATT003289.2
ENSRNOT00000065349	NONRATT001466.2	0.983637	3.07519e-07	Kifc1	NONRATT001466.2
ENSRNOT00000046798	NONRATT016045.2	0.983633	3.0784e-07	Mdc1	NONRATT016045.2
ENSRNOT00000032972	NONRATT016047.2	0.983621	3.08754e-07	Tacc3	NONRATT016047.2
ENSRNOT00000016157	NONRATT016343.2	0.983617	3.08993e-07	Ncaph	NONRATT016343.2
ENSRNOT00000017635	NONRATT018485.2	0.9836	3.10314e-07	Hmgb2l1	NONRATT018485.2
ENSRNOT00000080498	NONRATT008580.2	0.983583	3.11591e-07	Ndc80	NONRATT008580.2
ENSRNOT00000076451	NONRATT030132.2	0.983581	3.11717e-07	Esco2	NONRATT030132.2
ENSRNOT00000012454	NONRATT009960.2	0.983575	3.12159e-07	Knstrn	NONRATT009960.2
ENSRNOT00000064824	NONRATT008580.2	0.983564	3.12991e-07	Rbl1	NONRATT008580.2
ENSRNOT00000002085	NONRATT030132.2	0.983556	3.1364e-07	Hat1	NONRATT030132.2
ENSRNOT00000020803	NONRATT016343.2	0.983552	3.13897e-07	Cdca3	NONRATT016343.2
ENSRNOT00000002085	NONRATT003289.2	0.983539	3.14883e-07	Hat1	NONRATT003289.2
ENSRNOT00000006235	TCONS_00010418	0.983537	3.15093e-07	Nek2l1	TCONS_00010418
ENSRNOT00000084445	NONRATT009960.2	0.983535	3.15243e-07	Cenpn	NONRATT009960.2
ENSRNOT00000037444	NONRATT033407.1	0.983515	3.16736e-07	Mis18a	NONRATT033407.1
ENSRNOT00000077823	NONRATT005180.2	0.9835	3.17904e-07	Incenp	NONRATT005180.2
ENSRNOT00000038176	NONRATT016343.2	0.98349	3.1864e-07	Mki67	NONRATT016343.2
ENSRNOT00000052312	NONRATT005357.2	0.983482	3.19257e-07	Nusap1	NONRATT005357.2
ENSRNOT00000084445	NONRATT008570.2	0.983478	3.19604e-07	Cenpn	NONRATT008570.2
ENSRNOT00000079726	NONRATT015583.2	0.983468	3.20369e-07	Kif11	NONRATT015583.2
ENSRNOT00000028898	NONRATT001466.2	0.983463	3.20771e-07	Mcm8	NONRATT001466.2
ENSRNOT00000032723	NONRATT016343.2	0.983456	3.2126e-07	Ska3	NONRATT016343.2
ENSRNOT00000015065	NONRATT033405.1	0.983454	3.21479e-07	Blm	NONRATT033405.1
ENSRNOT00000043387	NONRATT028358.2	0.983441	3.22441e-07	Incenp	NONRATT028358.2
ENSRNOT00000008837	NONRATT008517.2	0.98344	3.22544e-07	Spc25	NONRATT008517.2
ENSRNOT00000004969	NONRATT005180.2	0.983439	3.22601e-07	Mcm6	NONRATT005180.2
ENSRNOT00000015065	NONRATT018439.2	0.983435	3.22905e-07	Blm	NONRATT018439.2
ENSRNOT00000016157	NONRATT015583.2	0.983433	3.23102e-07	Ncaph	NONRATT015583.2
ENSRNOT00000024301	NONRATT018439.2	0.983404	3.25303e-07	Gins4	NONRATT018439.2
ENSRNOT00000091016	NONRATT018485.2	0.983402	3.25486e-07	Aurkb	NONRATT018485.2
ENSRNOT00000005857	NONRATT008570.2	0.983398	3.25828e-07	Fignl1	NONRATT008570.2
ENSRNOT00000005835	NONRATT030261.2	0.983394	3.26127e-07	Pole2	NONRATT030261.2
ENSRNOT00000017635	NONRATT010050.2	0.983385	3.26807e-07	Hmgb2l1	NONRATT010050.2
ENSRNOT00000006964	NONRATT015583.2	0.983365	3.28346e-07	Asf1b	NONRATT015583.2
ENSRNOT00000015651	NONRATT015583.2	0.98335	3.29522e-07	Spag5	NONRATT015583.2
ENSRNOT00000051065	NONRATT003289.2	0.983338	3.30529e-07	Hjurp	NONRATT003289.2
ENSRNOT00000003650	NONRATT027850.2	0.983331	3.31083e-07	Nuf2	NONRATT027850.2
ENSRNOT00000025629	NONRATT030132.2	0.983321	3.31855e-07	Plk1	NONRATT030132.2
ENSRNOT00000005576	NONRATT032352.1	0.983318	3.32097e-07	Dtl	NONRATT032352.1
ENSRNOT00000064392	NONRATT016045.2	0.983312	3.32546e-07	Ccnf	NONRATT016045.2
ENSRNOT00000017314	NONRATT030132.2	0.983308	3.32908e-07	Espl1	NONRATT030132.2
ENSRNOT00000005576	NONRATT001466.2	0.983299	3.33599e-07	Dtl	NONRATT001466.2
ENSRNOT00000089544	NONRATT028569.2	0.983292	3.34154e-07	Prkag1	NONRATT028569.2
ENSRNOT00000064392	NONRATT009960.2	0.983285	3.34712e-07	Ccnf	NONRATT009960.2
ENSRNOT00000028109	NONRATT033407.1	0.983275	3.35477e-07	Brca1	NONRATT033407.1
ENSRNOT00000021308	NONRATT016343.2	0.98327	3.35929e-07	Fam83d	NONRATT016343.2
ENSRNOT00000032723	NONRATT022152.2	0.98326	3.36683e-07	Ska3	NONRATT022152.2
ENSRNOT00000085176	NONRATT028358.2	0.983243	3.38082e-07	Kif18a	NONRATT028358.2
ENSRNOT00000005835	NONRATT018485.2	0.983242	3.3815e-07	Pole2	NONRATT018485.2
ENSRNOT00000012038	NONRATT018485.2	0.983227	3.39339e-07	Kif14	NONRATT018485.2
ENSRNOT00000074148	NONRATT008580.2	0.983218	3.40049e-07	Lin9	NONRATT008580.2
ENSRNOT00000006235	NONRATT005357.2	0.983214	3.40378e-07	Nek2l1	NONRATT005357.2
ENSRNOT00000022133	NONRATT027850.2	0.9832	3.41536e-07	Cep55	NONRATT027850.2
ENSRNOT00000017635	NONRATT015583.2	0.983197	3.41791e-07	Hmgb2l1	NONRATT015583.2
ENSRNOT00000086806	NONRATT033407.1	0.983177	3.43383e-07	Cdk1	NONRATT033407.1
ENSRNOT00000029416	NONRATT018485.2	0.983173	3.43727e-07	Fbxo5	NONRATT018485.2
ENSRNOT00000087132	NONRATT028358.2	0.983157	3.45009e-07	Rad51b	NONRATT028358.2
ENSRNOT00000007285	TCONS_00010418	0.983154	3.4524e-07	Mad2l1	TCONS_00010418
ENSRNOT00000028109	NONRATT030261.2	0.983151	3.45495e-07	Brca1	NONRATT030261.2
ENSRNOT00000012088	NONRATT009960.2	0.983144	3.46076e-07	Cdkn2c	NONRATT009960.2
ENSRNOT00000082618	NONRATT008570.2	0.983134	3.46879e-07	Fancd2	NONRATT008570.2
ENSRNOT00000000783	NONRATT009960.2	0.98311	3.48879e-07	Cdk1	NONRATT009960.2
ENSRNOT00000064824	NONRATT018485.2	0.983105	3.49291e-07	Rbl1	NONRATT018485.2
ENSRNOT00000072387	NONRATT028358.2	0.983088	3.50687e-07	Birc5	NONRATT028358.2
ENSRNOT00000010025	NONRATT003289.2	0.983073	3.51965e-07	Xrcc2	NONRATT003289.2
ENSRNOT00000017314	NONRATT022152.2	0.983068	3.52373e-07	Espl1	NONRATT022152.2
ENSRNOT00000010955	NONRATT003292.2	0.983048	3.53965e-07	Gins1	NONRATT003292.2
ENSRNOT00000079726	NONRATT027850.2	0.983046	3.54131e-07	Kif11	NONRATT027850.2
ENSRNOT00000008149	NONRATT008570.2	0.983038	3.54853e-07	Ezh2	NONRATT008570.2
ENSRNOT00000051065	NONRATT030132.2	0.983035	3.55095e-07	Hjurp	NONRATT030132.2
ENSRNOT00000039344	NONRATT022152.2	0.983034	3.55185e-07	Bora	NONRATT022152.2
ENSRNOT00000012454	NONRATT001466.2	0.983024	3.55958e-07	Knstrn	NONRATT001466.2
ENSRNOT00000075997	NONRATT008570.2	0.983018	3.5651e-07	Pola1	NONRATT008570.2
ENSRNOT00000000783	NONRATT028358.2	0.983012	3.57021e-07	Cdk1	NONRATT028358.2
ENSRNOT00000037368	NONRATT016047.2	0.983003	3.57722e-07	Cdc25c	NONRATT016047.2
ENSRNOT00000072493	NONRATT008580.2	0.982994	3.58477e-07	Cdca5	NONRATT008580.2
ENSRNOT00000008492	NONRATT005357.2	0.982989	3.58943e-07	Aurkb	NONRATT005357.2
ENSRNOT00000085344	NONRATT016047.2	0.982988	3.58995e-07	Top2a	NONRATT016047.2
ENSRNOT00000025389	NONRATT016045.2	0.982974	3.6017e-07	Gmnn	NONRATT016045.2
ENSRNOT00000037368	NONRATT018439.2	0.982972	3.60333e-07	Cdc25c	NONRATT018439.2
ENSRNOT00000064392	NONRATT018485.2	0.982966	3.60874e-07	Ccnf	NONRATT018485.2
ENSRNOT00000010025	NONRATT033405.1	0.982934	3.63608e-07	Xrcc2	NONRATT033405.1
ENSRNOT00000074058	NONRATT005357.2	0.982933	3.63619e-07	Rrm1	NONRATT005357.2
ENSRNOT00000025629	NONRATT005357.2	0.982924	3.64418e-07	Plk1	NONRATT005357.2
ENSRNOT00000002487	NONRATT005180.2	0.982924	3.64436e-07	Rfc4	NONRATT005180.2
ENSRNOT00000006964	NONRATT008580.2	0.982922	3.64547e-07	Asf1b	NONRATT008580.2
ENSRNOT00000063995	NONRATT033405.1	0.98291	3.65626e-07	Polq	NONRATT033405.1
ENSRNOT00000043387	NONRATT008580.2	0.982909	3.65652e-07	Incenp	NONRATT008580.2
ENSRNOT00000081424	NONRATT001466.2	0.982903	3.66211e-07	Cdc6	NONRATT001466.2
ENSRNOT00000048293	NONRATT015585.2	0.9829	3.66424e-07	Cdca8	NONRATT015585.2
ENSRNOT00000001475	NONRATT030261.2	0.982893	3.6707e-07	Brca2	NONRATT030261.2
ENSRNOT00000022170	NONRATT018276.2	0.982889	3.6742e-07	Nasp	NONRATT018276.2
ENSRNOT00000037444	NONRATT008580.2	0.982888	3.67511e-07	Mis18a	NONRATT008580.2
ENSRNOT00000001825	NONRATT024911.2	0.982876	3.6852e-07	Mcm7	NONRATT024911.2
ENSRNOT00000051065	NONRATT005180.2	0.982874	3.68687e-07	Hjurp	NONRATT005180.2
ENSRNOT00000025903	NONRATT033407.1	0.982868	3.69222e-07	Kif2c	NONRATT033407.1
ENSRNOT00000002299	NONRATT016045.2	0.982861	3.69834e-07	Chaf1b	NONRATT016045.2
ENSRNOT00000024301	NONRATT028358.2	0.982858	3.70016e-07	Gins4	NONRATT028358.2
ENSRNOT00000006235	NONRATT033405.1	0.982857	3.70128e-07	Nek2l1	NONRATT033405.1
ENSRNOT00000010696	NONRATT001466.2	0.982853	3.70452e-07	Ccne2	NONRATT001466.2
ENSRNOT00000034565	NONRATT003292.2	0.982847	3.70958e-07	Cenpe	NONRATT003292.2
ENSRNOT00000008492	NONRATT005180.2	0.982846	3.71076e-07	Aurkb	NONRATT005180.2
ENSRNOT00000091172	NONRATT003289.2	0.982844	3.71213e-07	Brip1	NONRATT003289.2
ENSRNOT00000006235	NONRATT016047.2	0.98282	3.73355e-07	Nek2l1	NONRATT016047.2
ENSRNOT00000017635	NONRATT015585.2	0.982817	3.73579e-07	Hmgb2l1	NONRATT015585.2
ENSRNOT00000008149	NONRATT001466.2	0.982806	3.7454e-07	Ezh2	NONRATT001466.2
ENSRNOT00000055102	NONRATT003289.2	0.982804	3.74672e-07	Aurka	NONRATT003289.2
ENSRNOT00000080498	NONRATT016343.2	0.982801	3.74981e-07	Ndc80	NONRATT016343.2
ENSRNOT00000001825	NONRATT016045.2	0.982797	3.75322e-07	Mcm7	NONRATT016045.2
ENSRNOT00000010025	NONRATT016045.2	0.982777	3.77076e-07	Xrcc2	NONRATT016045.2
ENSRNOT00000018644	NONRATT018485.2	0.982767	3.77892e-07	Ndc80	NONRATT018485.2
ENSRNOT00000008837	TCONS_00010418	0.982746	3.79806e-07	Spc25	TCONS_00010418
ENSRNOT00000077899	NONRATT016047.2	0.982742	3.80124e-07	Mastl	NONRATT016047.2
ENSRNOT00000064392	NONRATT003289.2	0.982732	3.81009e-07	Ccnf	NONRATT003289.2
ENSRNOT00000064392	NONRATT016343.2	0.98272	3.8203e-07	Ccnf	NONRATT016343.2
ENSRNOT00000083151	NONRATT018439.2	0.982707	3.83213e-07	Ttk	NONRATT018439.2
ENSRNOT00000048293	NONRATT008517.2	0.982698	3.83948e-07	Cdca8	NONRATT008517.2
ENSRNOT00000022231	NONRATT012479.2	0.982671	3.86356e-07	Mcm2	NONRATT012479.2
ENSRNOT00000087132	NONRATT008580.2	0.982649	3.88366e-07	Rad51b	NONRATT008580.2
ENSRNOT00000025389	NONRATT008580.2	0.982632	3.89888e-07	Gmnn	NONRATT008580.2
ENSRNOT00000025629	NONRATT016045.2	0.982618	3.91122e-07	Plk1	NONRATT016045.2
ENSRNOT00000019799	NONRATT003289.2	0.982588	3.93797e-07	Lig1	NONRATT003289.2
ENSRNOT00000038176	NONRATT030132.2	0.982584	3.94189e-07	Mki67	NONRATT030132.2
ENSRNOT00000012088	NONRATT033407.1	0.982578	3.94677e-07	Cdkn2c	NONRATT033407.1
ENSRNOT00000006235	NONRATT029356.2	0.982571	3.95352e-07	Nek2l1	NONRATT029356.2
ENSRNOT00000017532	NONRATT033405.1	0.982553	3.96974e-07	Prc1	NONRATT033405.1
ENSRNOT00000034565	NONRATT015583.2	0.982545	3.97715e-07	Cenpe	NONRATT015583.2
ENSRNOT00000052312	NONRATT008570.2	0.982541	3.98072e-07	Nusap1	NONRATT008570.2
ENSRNOT00000034565	NONRATT016045.2	0.982537	3.98392e-07	Cenpe	NONRATT016045.2
ENSRNOT00000082846	NONRATT033407.1	0.982532	3.9882e-07	Ccnb1	NONRATT033407.1
ENSRNOT00000032972	TCONS_00010418	0.98253	3.99011e-07	Tacc3	TCONS_00010418
ENSRNOT00000080498	NONRATT003289.2	0.98253	3.99044e-07	Ndc80	NONRATT003289.2
ENSRNOT00000010025	NONRATT028358.2	0.982502	4.01625e-07	Xrcc2	NONRATT028358.2
ENSRNOT00000074148	NONRATT001466.2	0.98249	4.02689e-07	Lin9	NONRATT001466.2
ENSRNOT00000084128	NONRATT028358.2	0.982473	4.04239e-07	Kif18b	NONRATT028358.2
ENSRNOT00000031163	NONRATT033405.1	0.98247	4.04539e-07	Cdca2	NONRATT033405.1
ENSRNOT00000065721	NONRATT030261.2	0.982469	4.04595e-07	Sgol1	NONRATT030261.2
ENSRNOT00000063995	NONRATT008580.2	0.982467	4.04839e-07	Polq	NONRATT008580.2
ENSRNOT00000024301	NONRATT003289.2	0.982456	4.05773e-07	Gins4	NONRATT003289.2
ENSRNOT00000082618	NONRATT008517.2	0.98243	4.0819e-07	Fancd2	NONRATT008517.2
ENSRNOT00000019799	NONRATT033407.1	0.982386	4.12299e-07	Lig1	NONRATT033407.1
ENSRNOT00000025389	NONRATT016047.2	0.982371	4.13694e-07	Gmnn	NONRATT016047.2
ENSRNOT00000091551	NONRATT028358.2	0.982351	4.15564e-07	Rrm2	NONRATT028358.2
ENSRNOT00000025629	NONRATT027850.2	0.982334	4.17163e-07	Plk1	NONRATT027850.2
ENSRNOT00000028887	NONRATT016045.2	0.982325	4.18043e-07	Pcna	NONRATT016045.2
ENSRNOT00000017081	NONRATT001466.2	0.982314	4.19043e-07	Mcm3	NONRATT001466.2
ENSRNOT00000082618	NONRATT033405.1	0.982313	4.19144e-07	Fancd2	NONRATT033405.1
ENSRNOT00000063995	NONRATT018485.2	0.982269	4.23264e-07	Polq	NONRATT018485.2
ENSRNOT00000087132	NONRATT016343.2	0.982246	4.25467e-07	Rad51b	NONRATT016343.2
ENSRNOT00000085880	TCONS_00010418	0.982231	4.26958e-07	Kif20b	TCONS_00010418
ENSRNOT00000084445	NONRATT028358.2	0.982207	4.29167e-07	Cenpn	NONRATT028358.2
ENSRNOT00000083151	NONRATT016047.2	0.982206	4.29352e-07	Ttk	NONRATT016047.2
ENSRNOT00000017549	NONRATT008570.2	0.982194	4.30448e-07	Rpa2	NONRATT008570.2
ENSRNOT00000012454	NONRATT003289.2	0.982189	4.30942e-07	Knstrn	NONRATT003289.2
ENSRNOT00000084271	NONRATT004419.2	0.982187	4.31088e-07	Mcm5	NONRATT004419.2
ENSRNOT00000029416	NONRATT001466.2	0.982184	4.31468e-07	Fbxo5	NONRATT001466.2
ENSRNOT00000035383	NONRATT016047.2	0.982183	4.31527e-07	Pmf1	NONRATT016047.2
ENSRNOT00000012454	NONRATT005357.2	0.98217	4.32751e-07	Knstrn	NONRATT005357.2
ENSRNOT00000039344	TCONS_00010418	0.982123	4.37294e-07	Bora	TCONS_00010418
ENSRNOT00000068520	NONRATT030132.2	0.98212	4.37612e-07	Cdc7	NONRATT030132.2
ENSRNOT00000051065	NONRATT033405.1	0.982117	4.37955e-07	Hjurp	NONRATT033405.1
ENSRNOT00000028898	NONRATT033405.1	0.98211	4.38617e-07	Mcm8	NONRATT033405.1
ENSRNOT00000012454	TCONS_00010418	0.982109	4.38718e-07	Knstrn	TCONS_00010418
ENSRNOT00000082618	NONRATT003292.2	0.982108	4.38746e-07	Fancd2	NONRATT003292.2
ENSRNOT00000083016	NONRATT027850.2	0.982101	4.39454e-07	Ncapd2	NONRATT027850.2
ENSRNOT00000091172	NONRATT005180.2	0.982095	4.4005e-07	Brip1	NONRATT005180.2
ENSRNOT00000086806	NONRATT028358.2	0.982071	4.4244e-07	Cdk1	NONRATT028358.2
ENSRNOT00000065721	NONRATT018552.2	0.982068	4.42682e-07	Sgol1	NONRATT018552.2
ENSRNOT00000016828	NONRATT016047.2	0.98206	4.43453e-07	Prim2	NONRATT016047.2
ENSRNOT00000081424	NONRATT016045.2	0.982012	4.48235e-07	Cdc6	NONRATT016045.2
ENSRNOT00000028898	NONRATT009960.2	0.98201	4.48415e-07	Mcm8	NONRATT009960.2
ENSRNOT00000072027	NONRATT030261.2	0.982008	4.48609e-07	Cdc45	NONRATT030261.2
ENSRNOT00000072493	NONRATT029356.2	0.982002	4.49259e-07	Cdca5	NONRATT029356.2
ENSRNOT00000091016	NONRATT008580.2	0.982001	4.49325e-07	Aurkb	NONRATT008580.2
ENSRNOT00000021308	NONRATT016045.2	0.981996	4.4985e-07	Fam83d	NONRATT016045.2
ENSRNOT00000063995	NONRATT016343.2	0.981993	4.50165e-07	Polq	NONRATT016343.2
ENSRNOT00000082618	NONRATT030261.2	0.981988	4.5057e-07	Fancd2	NONRATT030261.2
ENSRNOT00000005835	NONRATT009960.2	0.981972	4.52216e-07	Pole2	NONRATT009960.2
ENSRNOT00000005857	NONRATT016047.2	0.981969	4.52528e-07	Fignl1	NONRATT016047.2
ENSRNOT00000008254	NONRATT004419.2	0.981937	4.55702e-07	Dsn1	NONRATT004419.2
ENSRNOT00000084445	NONRATT003289.2	0.981916	4.57824e-07	Cenpn	NONRATT003289.2
ENSRNOT00000034565	NONRATT005180.2	0.9819	4.5942e-07	Cenpe	NONRATT005180.2
ENSRNOT00000086806	NONRATT014811.2	0.981894	4.60021e-07	Cdk1	NONRATT014811.2
ENSRNOT00000077899	NONRATT008517.2	0.98188	4.61484e-07	Mastl	NONRATT008517.2
ENSRNOT00000065721	NONRATT030132.2	0.98186	4.63504e-07	Sgol1	NONRATT030132.2
ENSRNOT00000019799	NONRATT030132.2	0.981841	4.65437e-07	Lig1	NONRATT030132.2
ENSRNOT00000016828	NONRATT016045.2	0.981838	4.65765e-07	Prim2	NONRATT016045.2
ENSRNOT00000010025	NONRATT030261.2	0.981835	4.66042e-07	Xrcc2	NONRATT030261.2
ENSRNOT00000028898	NONRATT030261.2	0.981829	4.66655e-07	Mcm8	NONRATT030261.2
ENSRNOT00000083848	NONRATT028358.2	0.98181	4.6863e-07	Uhrf1	NONRATT028358.2
ENSRNOT00000032723	NONRATT033405.1	0.981804	4.69184e-07	Ska3	NONRATT033405.1
ENSRNOT00000083111	NONRATT009960.2	0.9818	4.69571e-07	Brca1	NONRATT009960.2
ENSRNOT00000034565	NONRATT022152.2	0.981796	4.69984e-07	Cenpe	NONRATT022152.2
ENSRNOT00000021308	NONRATT005180.2	0.981786	4.71102e-07	Fam83d	NONRATT005180.2
ENSRNOT00000039344	NONRATT003289.2	0.981758	4.73948e-07	Bora	NONRATT003289.2
ENSRNOT00000083016	NONRATT030132.2	0.981756	4.74122e-07	Ncapd2	NONRATT030132.2
ENSRNOT00000010025	NONRATT008570.2	0.981718	4.78119e-07	Xrcc2	NONRATT008570.2
ENSRNOT00000077823	NONRATT009960.2	0.981689	4.81087e-07	Incenp	NONRATT009960.2
ENSRNOT00000028898	NONRATT029356.2	0.981678	4.82316e-07	Mcm8	NONRATT029356.2
ENSRNOT00000036151	NONRATT003292.2	0.981665	4.83657e-07	Cdc20	NONRATT003292.2
ENSRNOT00000074148	NONRATT016343.2	0.981656	4.84561e-07	Lin9	NONRATT016343.2
ENSRNOT00000084445	NONRATT030132.2	0.981641	4.86171e-07	Cenpn	NONRATT030132.2
ENSRNOT00000036151	TCONS_00010418	0.981593	4.91201e-07	Cdc20	TCONS_00010418
ENSRNOT00000010955	NONRATT016343.2	0.981584	4.92222e-07	Gins1	NONRATT016343.2
ENSRNOT00000010955	NONRATT027850.2	0.981583	4.92248e-07	Gins1	NONRATT027850.2
ENSRNOT00000002299	NONRATT028358.2	0.981556	4.95141e-07	Chaf1b	NONRATT028358.2
ENSRNOT00000012088	NONRATT003289.2	0.981554	4.95426e-07	Cdkn2c	NONRATT003289.2
ENSRNOT00000021156	NONRATT033407.1	0.981539	4.97025e-07	Ccna2	NONRATT033407.1
ENSRNOT00000010406	NONRATT001466.2	0.981538	4.97075e-07	Bub1b	NONRATT001466.2
ENSRNOT00000012404	NONRATT003292.2	0.981526	4.98351e-07	Zwilch	NONRATT003292.2
ENSRNOT00000010696	NONRATT003292.2	0.981521	4.98895e-07	Ccne2	NONRATT003292.2
ENSRNOT00000065593	NONRATT009960.2	0.981509	5.00194e-07	Prim1	NONRATT009960.2
ENSRNOT00000025389	NONRATT001466.2	0.981503	5.00903e-07	Gmnn	NONRATT001466.2
ENSRNOT00000025903	NONRATT005357.2	0.981502	5.0091e-07	Kif2c	NONRATT005357.2
ENSRNOT00000003650	NONRATT029356.2	0.981498	5.01433e-07	Nuf2	NONRATT029356.2
ENSRNOT00000086806	NONRATT029356.2	0.981474	5.03935e-07	Cdk1	NONRATT029356.2
ENSRNOT00000002085	NONRATT005180.2	0.981461	5.0539e-07	Hat1	NONRATT005180.2
ENSRNOT00000079726	NONRATT005180.2	0.981454	5.06129e-07	Kif11	NONRATT005180.2
ENSRNOT00000064824	NONRATT003292.2	0.981453	5.06293e-07	Rbl1	NONRATT003292.2
ENSRNOT00000032972	NONRATT001466.2	0.981444	5.0724e-07	Tacc3	NONRATT001466.2
ENSRNOT00000021308	NONRATT016047.2	0.981432	5.08526e-07	Fam83d	NONRATT016047.2
ENSRNOT00000074058	NONRATT029356.2	0.981422	5.09657e-07	Rrm1	NONRATT029356.2
ENSRNOT00000083111	NONRATT033407.1	0.981397	5.12363e-07	Brca1	NONRATT033407.1
ENSRNOT00000002066	NONRATT001466.2	0.981383	5.13858e-07	Cdca7	NONRATT001466.2
ENSRNOT00000074148	NONRATT033405.1	0.981382	5.14059e-07	Lin9	NONRATT033405.1
ENSRNOT00000021308	NONRATT033407.1	0.981367	5.15631e-07	Fam83d	NONRATT033407.1
ENSRNOT00000003650	NONRATT003292.2	0.981353	5.17171e-07	Nuf2	NONRATT003292.2
ENSRNOT00000051065	NONRATT033407.1	0.981344	5.18222e-07	Hjurp	NONRATT033407.1
ENSRNOT00000047420	NONRATT028358.2	0.981337	5.18964e-07	Palb2	NONRATT028358.2
ENSRNOT00000005835	NONRATT003292.2	0.981333	5.19387e-07	Pole2	NONRATT003292.2
ENSRNOT00000003650	NONRATT022152.2	0.981327	5.20053e-07	Nuf2	NONRATT022152.2
ENSRNOT00000071107	NONRATT005180.2	0.981327	5.20093e-07	Chaf1a	NONRATT005180.2
ENSRNOT00000052312	NONRATT005180.2	0.981319	5.20973e-07	Nusap1	NONRATT005180.2
ENSRNOT00000086806	NONRATT008580.2	0.981305	5.22516e-07	Cdk1	NONRATT008580.2
ENSRNOT00000091172	NONRATT028662.2	0.981305	5.22564e-07	Brip1	NONRATT028662.2
ENSRNOT00000068623	NONRATT005180.2	0.981293	5.23812e-07	Nsl1	NONRATT005180.2
ENSRNOT00000016157	NONRATT027850.2	0.981288	5.24364e-07	Ncaph	NONRATT027850.2
ENSRNOT00000012512	NONRATT016343.2	0.981286	5.24589e-07	Cenpa	NONRATT016343.2
ENSRNOT00000004525	NONRATT018439.2	0.981281	5.25244e-07	Cenpf	NONRATT018439.2
ENSRNOT00000087132	NONRATT008570.2	0.981263	5.27175e-07	Rad51b	NONRATT008570.2
ENSRNOT00000028109	NONRATT028358.2	0.981259	5.27694e-07	Brca1	NONRATT028358.2
ENSRNOT00000008492	TCONS_00010418	0.981245	5.29207e-07	Aurkb	TCONS_00010418
ENSRNOT00000004525	NONRATT016047.2	0.981239	5.29922e-07	Cenpf	NONRATT016047.2
ENSRNOT00000091551	NONRATT008570.2	0.981234	5.30403e-07	Rrm2	NONRATT008570.2
ENSRNOT00000091016	NONRATT005180.2	0.981223	5.31738e-07	Aurkb	NONRATT005180.2
ENSRNOT00000018644	NONRATT029356.2	0.981199	5.34438e-07	Ndc80	NONRATT029356.2
ENSRNOT00000065677	NONRATT001466.2	0.981133	5.41853e-07	Cenpw	NONRATT001466.2
ENSRNOT00000022658	NONRATT028358.2	0.981103	5.45342e-07	Fanca	NONRATT028358.2
ENSRNOT00000047420	NONRATT016045.2	0.981098	5.45899e-07	Palb2	NONRATT016045.2
ENSRNOT00000085344	NONRATT015583.2	0.981098	5.45954e-07	Top2a	NONRATT015583.2
ENSRNOT00000055102	NONRATT027850.2	0.981092	5.46632e-07	Aurka	NONRATT027850.2
ENSRNOT00000036151	NONRATT033405.1	0.981088	5.47016e-07	Cdc20	NONRATT033405.1
ENSRNOT00000005835	NONRATT015583.2	0.981074	5.48668e-07	Pole2	NONRATT015583.2
ENSRNOT00000028887	NONRATT001466.2	0.981072	5.48904e-07	Pcna	NONRATT001466.2
ENSRNOT00000072493	NONRATT016045.2	0.981058	5.50475e-07	Cdca5	NONRATT016045.2
ENSRNOT00000016157	NONRATT030261.2	0.981058	5.50555e-07	Ncaph	NONRATT030261.2
ENSRNOT00000074148	NONRATT018439.2	0.981044	5.52183e-07	Lin9	NONRATT018439.2
ENSRNOT00000082846	NONRATT029356.2	0.981028	5.54045e-07	Ccnb1	NONRATT029356.2
ENSRNOT00000015651	NONRATT001466.2	0.981016	5.55443e-07	Spag5	NONRATT001466.2
ENSRNOT00000065721	NONRATT016343.2	0.981015	5.55459e-07	Sgol1	NONRATT016343.2
ENSRNOT00000064392	NONRATT001466.2	0.980996	5.57671e-07	Ccnf	NONRATT001466.2
ENSRNOT00000081970	NONRATT015584.2	0.98099	5.58407e-07	LOC103690190	NONRATT015584.2
ENSRNOT00000000783	NONRATT005357.2	0.980985	5.59035e-07	Cdk1	NONRATT005357.2
ENSRNOT00000085176	NONRATT005357.2	0.98098	5.59616e-07	Kif18a	NONRATT005357.2
ENSRNOT00000019799	NONRATT027850.2	0.980959	5.62071e-07	Lig1	NONRATT027850.2
ENSRNOT00000051612	NONRATT011088.2	0.980956	5.62378e-07	Ttk	NONRATT011088.2
ENSRNOT00000020803	NONRATT015583.2	0.980936	5.64792e-07	Cdca3	NONRATT015583.2
ENSRNOT00000008254	NONRATT018485.2	0.980913	5.67466e-07	Dsn1	NONRATT018485.2
ENSRNOT00000048293	NONRATT005357.2	0.980907	5.68136e-07	Cdca8	NONRATT005357.2
ENSRNOT00000083340	NONRATT009960.2	0.980902	5.68812e-07	Cdk5rap2	NONRATT009960.2
ENSRNOT00000004525	NONRATT022152.2	0.980893	5.69871e-07	Cenpf	NONRATT022152.2
ENSRNOT00000082846	TCONS_00010418	0.980864	5.73349e-07	Ccnb1	TCONS_00010418
ENSRNOT00000077899	NONRATT016045.2	0.980863	5.73464e-07	Mastl	NONRATT016045.2
ENSRNOT00000066277	NONRATT022152.2	0.98086	5.73725e-07	Melk	NONRATT022152.2
ENSRNOT00000008254	NONRATT033407.1	0.980857	5.74141e-07	Dsn1	NONRATT033407.1
ENSRNOT00000091172	NONRATT028358.2	0.980846	5.75408e-07	Brip1	NONRATT028358.2
ENSRNOT00000085880	NONRATT018439.2	0.980843	5.75832e-07	Kif20b	NONRATT018439.2
ENSRNOT00000002085	NONRATT001466.2	0.980827	5.7768e-07	Hat1	NONRATT001466.2
ENSRNOT00000081424	NONRATT024911.2	0.980826	5.77817e-07	Cdc6	NONRATT024911.2
ENSRNOT00000005857	NONRATT003289.2	0.980816	5.79001e-07	Fignl1	NONRATT003289.2
ENSRNOT00000010696	NONRATT003289.2	0.980814	5.79319e-07	Ccne2	NONRATT003289.2
ENSRNOT00000022256	NONRATT015583.2	0.980802	5.80707e-07	Ns5atp9	NONRATT015583.2
ENSRNOT00000018644	NONRATT027850.2	0.980799	5.81064e-07	Ndc80	NONRATT027850.2
ENSRNOT00000072387	NONRATT008570.2	0.980798	5.81144e-07	Birc5	NONRATT008570.2
ENSRNOT00000072387	NONRATT015583.2	0.980791	5.82078e-07	Birc5	NONRATT015583.2
ENSRNOT00000091172	NONRATT022152.2	0.980786	5.82696e-07	Brip1	NONRATT022152.2
ENSRNOT00000008254	NONRATT005180.2	0.980785	5.82795e-07	Dsn1	NONRATT005180.2
ENSRNOT00000006964	NONRATT003292.2	0.980777	5.83779e-07	Asf1b	NONRATT003292.2
ENSRNOT00000018644	NONRATT001466.2	0.98077	5.84546e-07	Ndc80	NONRATT001466.2
ENSRNOT00000028898	NONRATT014811.2	0.980757	5.86127e-07	Mcm8	NONRATT014811.2
ENSRNOT00000010696	NONRATT009960.2	0.980734	5.8897e-07	Ccne2	NONRATT009960.2
ENSRNOT00000024301	NONRATT016045.2	0.980729	5.89524e-07	Gins4	NONRATT016045.2
ENSRNOT00000020803	NONRATT033405.1	0.980724	5.90129e-07	Cdca3	NONRATT033405.1
ENSRNOT00000015651	NONRATT022152.2	0.980719	5.90715e-07	Spag5	NONRATT022152.2
ENSRNOT00000002085	NONRATT018439.2	0.980713	5.91518e-07	Hat1	NONRATT018439.2
ENSRNOT00000065677	NONRATT005357.2	0.980706	5.92388e-07	Cenpw	NONRATT005357.2
ENSRNOT00000055102	NONRATT030132.2	0.980702	5.92826e-07	Aurka	NONRATT030132.2
ENSRNOT00000051064	NONRATT003292.2	0.980696	5.9354e-07	Cdc25b	NONRATT003292.2
ENSRNOT00000012038	NONRATT008580.2	0.980691	5.94191e-07	Kif14	NONRATT008580.2
ENSRNOT00000005857	NONRATT028358.2	0.980686	5.94835e-07	Fignl1	NONRATT028358.2
ENSRNOT00000000438	NONRATT011088.2	0.980672	5.96465e-07	Slc25a16	NONRATT011088.2
ENSRNOT00000034565	NONRATT016047.2	0.980667	5.9713e-07	Cenpe	NONRATT016047.2
ENSRNOT00000047420	NONRATT030261.2	0.980664	5.9747e-07	Palb2	NONRATT030261.2
ENSRNOT00000065349	NONRATT003289.2	0.980656	5.98502e-07	Kifc1	NONRATT003289.2
ENSRNOT00000068623	NONRATT016343.2	0.98065	5.99273e-07	Nsl1	NONRATT016343.2
ENSRNOT00000043387	NONRATT003292.2	0.980623	6.02499e-07	Incenp	NONRATT003292.2
ENSRNOT00000091172	NONRATT008570.2	0.980622	6.02617e-07	Brip1	NONRATT008570.2
ENSRNOT00000022658	NONRATT033407.1	0.980618	6.03179e-07	Fanca	NONRATT033407.1
ENSRNOT00000085880	NONRATT015583.2	0.980614	6.03682e-07	Kif20b	NONRATT015583.2
ENSRNOT00000017635	NONRATT030132.2	0.980606	6.04672e-07	Hmgb2l1	NONRATT030132.2
ENSRNOT00000085880	NONRATT022152.2	0.980596	6.05933e-07	Kif20b	NONRATT022152.2
ENSRNOT00000022133	NONRATT022152.2	0.980591	6.06494e-07	Cep55	NONRATT022152.2
ENSRNOT00000039344	NONRATT014026.2	0.980585	6.07217e-07	Bora	NONRATT014026.2
ENSRNOT00000083848	NONRATT008580.2	0.980578	6.08069e-07	Uhrf1	NONRATT008580.2
ENSRNOT00000084445	NONRATT005180.2	0.980571	6.08949e-07	Cenpn	NONRATT005180.2
ENSRNOT00000002510	NONRATT021856.2	0.980567	6.09517e-07	Mcm4	NONRATT021856.2
ENSRNOT00000083016	NONRATT030261.2	0.980565	6.09774e-07	Ncapd2	NONRATT030261.2
ENSRNOT00000036098	NONRATT016343.2	0.980548	6.11864e-07	Ska2	NONRATT016343.2
ENSRNOT00000032723	NONRATT016047.2	0.980548	6.11888e-07	Ska3	NONRATT016047.2
ENSRNOT00000065721	NONRATT003289.2	0.980481	6.20318e-07	Sgol1	NONRATT003289.2
ENSRNOT00000032723	NONRATT030132.2	0.98048	6.20455e-07	Ska3	NONRATT030132.2
ENSRNOT00000010696	TCONS_00021565	0.980476	6.20972e-07	Ccne2	TCONS_00021565
ENSRNOT00000080498	NONRATT003292.2	0.980474	6.21127e-07	Ndc80	NONRATT003292.2
ENSRNOT00000075997	NONRATT033405.1	0.980471	6.21546e-07	Pola1	NONRATT033405.1
ENSRNOT00000066277	NONRATT003292.2	0.980461	6.22809e-07	Melk	NONRATT003292.2
ENSRNOT00000083016	NONRATT005180.2	0.980452	6.24002e-07	Ncapd2	NONRATT005180.2
ENSRNOT00000029416	NONRATT008517.2	0.980449	6.24408e-07	Fbxo5	NONRATT008517.2
ENSRNOT00000007285	NONRATT027850.2	0.980447	6.24558e-07	Mad2l1	NONRATT027850.2
ENSRNOT00000063990	NONRATT015583.2	0.980447	6.24662e-07	Kntc1	NONRATT015583.2
ENSRNOT00000085591	NONRATT018439.2	0.980441	6.25423e-07	Chek2	NONRATT018439.2
ENSRNOT00000000783	NONRATT016343.2	0.980433	6.26365e-07	Cdk1	NONRATT016343.2
ENSRNOT00000005576	NONRATT016045.2	0.98042	6.28093e-07	Dtl	NONRATT016045.2
ENSRNOT00000072387	NONRATT021427.2	0.980406	6.29868e-07	Birc5	NONRATT021427.2
ENSRNOT00000017549	NONRATT018276.2	0.980404	6.30136e-07	Rpa2	NONRATT018276.2
ENSRNOT00000008492	NONRATT015585.2	0.980398	6.30897e-07	Aurkb	NONRATT015585.2
ENSRNOT00000002487	NONRATT028358.2	0.980394	6.31366e-07	Rfc4	NONRATT028358.2
ENSRNOT00000065721	NONRATT005180.2	0.980385	6.32565e-07	Sgol1	NONRATT005180.2
ENSRNOT00000008149	NONRATT018276.2	0.980383	6.32745e-07	Ezh2	NONRATT018276.2
ENSRNOT00000076451	NONRATT027850.2	0.980379	6.333e-07	Esco2	NONRATT027850.2
ENSRNOT00000010955	NONRATT016045.2	0.980371	6.34259e-07	Gins1	NONRATT016045.2
ENSRNOT00000028109	NONRATT016045.2	0.98037	6.3444e-07	Brca1	NONRATT016045.2
ENSRNOT00000051064	NONRATT027850.2	0.98036	6.35695e-07	Cdc25b	NONRATT027850.2
ENSRNOT00000032972	NONRATT029356.2	0.98035	6.37017e-07	Tacc3	NONRATT029356.2
ENSRNOT00000036702	NONRATT029356.2	0.98035	6.37041e-07	Cenpt	NONRATT029356.2
ENSRNOT00000032723	NONRATT009960.2	0.980342	6.38023e-07	Ska3	NONRATT009960.2
ENSRNOT00000008254	NONRATT001466.2	0.980332	6.39374e-07	Dsn1	NONRATT001466.2
ENSRNOT00000002066	NONRATT008570.2	0.980329	6.3978e-07	Cdca7	NONRATT008570.2
ENSRNOT00000068623	NONRATT016045.2	0.980317	6.41306e-07	Nsl1	NONRATT016045.2
ENSRNOT00000089178	NONRATT016343.2	0.980302	6.43272e-07	Skp2	NONRATT016343.2
ENSRNOT00000083111	NONRATT030132.2	0.980289	6.4491e-07	Brca1	NONRATT030132.2
ENSRNOT00000051612	NONRATT033407.1	0.980278	6.46329e-07	Ttk	NONRATT033407.1
ENSRNOT00000084271	NONRATT001466.2	0.980269	6.475e-07	Mcm5	NONRATT001466.2
ENSRNOT00000037368	NONRATT008570.2	0.980265	6.48105e-07	Cdc25c	NONRATT008570.2
ENSRNOT00000031783	NONRATT011088.2	0.980257	6.491e-07	Ticrr	NONRATT011088.2
ENSRNOT00000002299	NONRATT030132.2	0.980226	6.53174e-07	Chaf1b	NONRATT030132.2
ENSRNOT00000031783	NONRATT016045.2	0.980224	6.53417e-07	Ticrr	NONRATT016045.2
ENSRNOT00000005857	NONRATT009960.2	0.980217	6.54328e-07	Fignl1	NONRATT009960.2
ENSRNOT00000006235	NONRATT001466.2	0.980212	6.54941e-07	Nek2l1	NONRATT001466.2
ENSRNOT00000048293	NONRATT033407.1	0.980202	6.56274e-07	Cdca8	NONRATT033407.1
ENSRNOT00000067453	NONRATT033407.1	0.980193	6.57479e-07	Pole	NONRATT033407.1
ENSRNOT00000079726	TCONS_00010418	0.98019	6.57913e-07	Kif11	TCONS_00010418
ENSRNOT00000085880	NONRATT029356.2	0.980172	6.60332e-07	Kif20b	NONRATT029356.2
ENSRNOT00000024301	NONRATT009960.2	0.98015	6.63209e-07	Gins4	NONRATT009960.2
ENSRNOT00000017314	NONRATT001466.2	0.980141	6.64386e-07	Espl1	NONRATT001466.2
ENSRNOT00000051065	NONRATT008580.2	0.980123	6.66718e-07	Hjurp	NONRATT008580.2
ENSRNOT00000047420	NONRATT016047.2	0.980118	6.67488e-07	Palb2	NONRATT016047.2
ENSRNOT00000083016	NONRATT009960.2	0.980111	6.68353e-07	Ncapd2	NONRATT009960.2
ENSRNOT00000076451	NONRATT033405.1	0.9801	6.69874e-07	Esco2	NONRATT033405.1
ENSRNOT00000091688	NONRATT013044.2	0.980096	6.70408e-07	Hist1h1b	NONRATT013044.2
ENSRNOT00000051612	NONRATT016045.2	0.980089	6.71311e-07	Ttk	NONRATT016045.2
ENSRNOT00000075997	NONRATT008580.2	0.980067	6.7427e-07	Pola1	NONRATT008580.2
ENSRNOT00000004525	NONRATT003292.2	0.980066	6.74437e-07	Cenpf	NONRATT003292.2
ENSRNOT00000085176	NONRATT008580.2	0.980044	6.77316e-07	Kif18a	NONRATT008580.2
ENSRNOT00000068623	NONRATT003289.2	0.980017	6.80994e-07	Nsl1	NONRATT003289.2
ENSRNOT00000076451	TCONS_00010418	0.980013	6.8155e-07	Esco2	TCONS_00010418
ENSRNOT00000065721	NONRATT018485.2	0.980005	6.82693e-07	Sgol1	NONRATT018485.2
ENSRNOT00000012512	NONRATT033405.1	0.980003	6.82945e-07	Cenpa	NONRATT033405.1
ENSRNOT00000021156	NONRATT003292.2	0.979992	6.84385e-07	Ccna2	NONRATT003292.2
ENSRNOT00000083848	NONRATT016045.2	0.979971	6.87325e-07	Uhrf1	NONRATT016045.2
ENSRNOT00000019799	NONRATT018439.2	0.979959	6.8894e-07	Lig1	NONRATT018439.2
ENSRNOT00000065677	NONRATT033407.1	0.979955	6.89419e-07	Cenpw	NONRATT033407.1
ENSRNOT00000017635	NONRATT009960.2	0.979954	6.8965e-07	Hmgb2l1	NONRATT009960.2
ENSRNOT00000083016	NONRATT033405.1	0.979951	6.90036e-07	Ncapd2	NONRATT033405.1
ENSRNOT00000017532	TCONS_00010418	0.979943	6.91163e-07	Prc1	TCONS_00010418
ENSRNOT00000017314	NONRATT018485.2	0.979897	6.97372e-07	Espl1	NONRATT018485.2
ENSRNOT00000022133	NONRATT008517.2	0.979896	6.97601e-07	Cep55	NONRATT008517.2
ENSRNOT00000010025	NONRATT014026.2	0.97988	6.99787e-07	Xrcc2	NONRATT014026.2
ENSRNOT00000083016	NONRATT016047.2	0.979876	7.00382e-07	Ncapd2	NONRATT016047.2
ENSRNOT00000017635	NONRATT027850.2	0.97986	7.02512e-07	Hmgb2l1	NONRATT027850.2
ENSRNOT00000085880	NONRATT003292.2	0.979829	7.06859e-07	Kif20b	NONRATT003292.2
ENSRNOT00000077823	TCONS_00021565	0.979821	7.07987e-07	Incenp	TCONS_00021565
ENSRNOT00000017081	NONRATT005180.2	0.979819	7.0832e-07	Mcm3	NONRATT005180.2
ENSRNOT00000006964	NONRATT004419.2	0.979801	7.10806e-07	Asf1b	NONRATT004419.2
ENSRNOT00000076451	NONRATT016047.2	0.979797	7.11346e-07	Esco2	NONRATT016047.2
ENSRNOT00000064824	NONRATT016047.2	0.979795	7.11613e-07	Rbl1	NONRATT016047.2
ENSRNOT00000049967	NONRATT018276.2	0.979787	7.1279e-07	Atr	NONRATT018276.2
ENSRNOT00000064392	NONRATT003292.2	0.979785	7.13047e-07	Ccnf	NONRATT003292.2
ENSRNOT00000020803	TCONS_00021565	0.979784	7.131e-07	Cdca3	TCONS_00021565
ENSRNOT00000072387	NONRATT029356.2	0.979777	7.14176e-07	Birc5	NONRATT029356.2
ENSRNOT00000001444	NONRATT033405.1	0.979771	7.14991e-07	Rfc3	NONRATT033405.1
ENSRNOT00000031163	NONRATT001466.2	0.979757	7.16985e-07	Cdca2	NONRATT001466.2
ENSRNOT00000085176	NONRATT018276.2	0.979752	7.17651e-07	Kif18a	NONRATT018276.2
ENSRNOT00000036151	NONRATT030132.2	0.979742	7.19129e-07	Cdc20	NONRATT030132.2
ENSRNOT00000039344	NONRATT008570.2	0.97974	7.19299e-07	Bora	NONRATT008570.2
ENSRNOT00000085880	NONRATT005180.2	0.979698	7.25224e-07	Kif20b	NONRATT005180.2
ENSRNOT00000074148	NONRATT016047.2	0.979695	7.25673e-07	Lin9	NONRATT016047.2
ENSRNOT00000012404	NONRATT033405.1	0.979688	7.2665e-07	Zwilch	NONRATT033405.1
ENSRNOT00000065593	NONRATT016045.2	0.979684	7.27214e-07	Prim1	NONRATT016045.2
ENSRNOT00000085880	NONRATT008517.2	0.979663	7.30215e-07	Kif20b	NONRATT008517.2
ENSRNOT00000064824	NONRATT033407.1	0.979655	7.31381e-07	Rbl1	NONRATT033407.1
ENSRNOT00000085880	NONRATT027850.2	0.979655	7.31406e-07	Kif20b	NONRATT027850.2
ENSRNOT00000012088	NONRATT008517.2	0.979655	7.31461e-07	Cdkn2c	NONRATT008517.2
ENSRNOT00000025903	NONRATT008517.2	0.979653	7.31653e-07	Kif2c	NONRATT008517.2
ENSRNOT00000064824	NONRATT009960.2	0.979641	7.33413e-07	Rbl1	NONRATT009960.2
ENSRNOT00000012088	NONRATT027850.2	0.979631	7.34828e-07	Cdkn2c	NONRATT027850.2
ENSRNOT00000035383	NONRATT029356.2	0.979615	7.37086e-07	Pmf1	NONRATT029356.2
ENSRNOT00000012088	NONRATT003292.2	0.979612	7.37525e-07	Cdkn2c	NONRATT003292.2
ENSRNOT00000031163	NONRATT005357.2	0.979605	7.38613e-07	Cdca2	NONRATT005357.2
ENSRNOT00000001475	NONRATT011088.2	0.979598	7.39646e-07	Brca2	NONRATT011088.2
ENSRNOT00000006964	NONRATT008570.2	0.979594	7.40229e-07	Asf1b	NONRATT008570.2
ENSRNOT00000017532	NONRATT015583.2	0.979578	7.425e-07	Prc1	NONRATT015583.2
ENSRNOT00000077823	NONRATT022152.2	0.979564	7.44478e-07	Incenp	NONRATT022152.2
ENSRNOT00000051783	NONRATT029356.2	0.979556	7.45704e-07	Bub1	NONRATT029356.2
ENSRNOT00000089178	NONRATT009960.2	0.979544	7.47374e-07	Skp2	NONRATT009960.2
ENSRNOT00000008254	NONRATT009960.2	0.979528	7.49686e-07	Dsn1	NONRATT009960.2
ENSRNOT00000064824	NONRATT016343.2	0.979523	7.50529e-07	Rbl1	NONRATT016343.2
ENSRNOT00000087132	NONRATT009960.2	0.979506	7.52988e-07	Rad51b	NONRATT009960.2
ENSRNOT00000000783	NONRATT003289.2	0.9795	7.53829e-07	Cdk1	NONRATT003289.2
ENSRNOT00000000783	TCONS_00010418	0.9795	7.53858e-07	Cdk1	TCONS_00010418
ENSRNOT00000084445	NONRATT018439.2	0.979489	7.55421e-07	Cenpn	NONRATT018439.2
ENSRNOT00000022170	NONRATT008570.2	0.979465	7.58892e-07	Nasp	NONRATT008570.2
ENSRNOT00000040210	NONRATT018551.2	0.979455	7.60405e-07	LOC102551184	NONRATT018551.2
ENSRNOT00000032723	NONRATT008570.2	0.97945	7.61158e-07	Ska3	NONRATT008570.2
ENSRNOT00000089178	NONRATT015583.2	0.979445	7.61878e-07	Skp2	NONRATT015583.2
ENSRNOT00000067453	NONRATT030261.2	0.979442	7.62358e-07	Pole	NONRATT030261.2
ENSRNOT00000035255	NONRATT016045.2	0.979441	7.62493e-07	Ncapg2	NONRATT016045.2
ENSRNOT00000017081	NONRATT008580.2	0.979439	7.62724e-07	Mcm3	NONRATT008580.2
ENSRNOT00000083016	NONRATT033407.1	0.979436	7.63209e-07	Ncapd2	NONRATT033407.1
ENSRNOT00000035255	NONRATT008570.2	0.979431	7.63948e-07	Ncapg2	NONRATT008570.2
ENSRNOT00000036151	NONRATT015585.2	0.979428	7.64363e-07	Cdc20	NONRATT015585.2
ENSRNOT00000012088	NONRATT030132.2	0.979421	7.65443e-07	Cdkn2c	NONRATT030132.2
ENSRNOT00000037368	NONRATT024911.2	0.97942	7.65553e-07	Cdc25c	NONRATT024911.2
ENSRNOT00000079726	NONRATT018439.2	0.979413	7.6657e-07	Kif11	NONRATT018439.2
ENSRNOT00000017081	NONRATT004419.2	0.979412	7.66794e-07	Mcm3	NONRATT004419.2
ENSRNOT00000022170	NONRATT001466.2	0.979409	7.67165e-07	Nasp	NONRATT001466.2
ENSRNOT00000072027	NONRATT028358.2	0.979401	7.68411e-07	Cdc45	NONRATT028358.2
ENSRNOT00000063990	NONRATT001466.2	0.979377	7.72009e-07	Kntc1	NONRATT001466.2
ENSRNOT00000017549	NONRATT001466.2	0.97936	7.74566e-07	Rpa2	NONRATT001466.2
ENSRNOT00000001475	NONRATT022152.2	0.979353	7.75559e-07	Brca2	NONRATT022152.2
ENSRNOT00000051065	NONRATT022152.2	0.979352	7.75757e-07	Hjurp	NONRATT022152.2
ENSRNOT00000016828	NONRATT030261.2	0.979346	7.76517e-07	Prim2	NONRATT030261.2
ENSRNOT00000080119	NONRATT018551.2	0.979336	7.78067e-07	Hist1h2ak	NONRATT018551.2
ENSRNOT00000012454	NONRATT033407.1	0.979331	7.78842e-07	Knstrn	NONRATT033407.1
ENSRNOT00000072387	NONRATT018485.2	0.97933	7.79015e-07	Birc5	NONRATT018485.2
ENSRNOT00000082846	NONRATT018439.2	0.979312	7.81742e-07	Ccnb1	NONRATT018439.2
ENSRNOT00000010025	NONRATT016343.2	0.97931	7.81939e-07	Xrcc2	NONRATT016343.2
ENSRNOT00000031163	NONRATT016045.2	0.979305	7.82713e-07	Cdca2	NONRATT016045.2
ENSRNOT00000022133	NONRATT029356.2	0.979302	7.83189e-07	Cep55	NONRATT029356.2
ENSRNOT00000019799	NONRATT008517.2	0.979292	7.84621e-07	Lig1	NONRATT008517.2
ENSRNOT00000020014	NONRATT021856.2	0.979269	7.88212e-07	Ccne1	NONRATT021856.2
ENSRNOT00000086806	NONRATT016343.2	0.979245	7.91864e-07	Cdk1	NONRATT016343.2
ENSRNOT00000024301	NONRATT033407.1	0.979235	7.93259e-07	Gins4	NONRATT033407.1
ENSRNOT00000025389	NONRATT033407.1	0.979233	7.93666e-07	Gmnn	NONRATT033407.1
ENSRNOT00000010025	NONRATT016047.2	0.979231	7.93963e-07	Xrcc2	NONRATT016047.2
ENSRNOT00000051612	NONRATT022152.2	0.979228	7.94299e-07	Ttk	NONRATT022152.2
ENSRNOT00000021308	NONRATT015583.2	0.979224	7.95016e-07	Fam83d	NONRATT015583.2
ENSRNOT00000074058	TCONS_00010418	0.979213	7.96597e-07	Rrm1	TCONS_00010418
ENSRNOT00000055102	NONRATT018439.2	0.979205	7.97834e-07	Aurka	NONRATT018439.2
ENSRNOT00000003650	NONRATT001466.2	0.979205	7.97951e-07	Nuf2	NONRATT001466.2
ENSRNOT00000083340	NONRATT008517.2	0.979202	7.98326e-07	Cdk5rap2	NONRATT008517.2
ENSRNOT00000071405	NONRATT001559.2	-0.979186	8.00821e-07	Kdr	NONRATT001559.2
ENSRNOT00000032723	NONRATT030261.2	0.979164	8.04166e-07	Ska3	NONRATT030261.2
ENSRNOT00000005857	NONRATT016343.2	0.97916	8.04766e-07	Fignl1	NONRATT016343.2
ENSRNOT00000004525	NONRATT005180.2	0.979156	8.05364e-07	Cenpf	NONRATT005180.2
ENSRNOT00000001444	NONRATT029356.2	0.979145	8.0714e-07	Rfc3	NONRATT029356.2
ENSRNOT00000065349	NONRATT003292.2	0.979142	8.0745e-07	Kifc1	NONRATT003292.2
ENSRNOT00000012512	NONRATT005357.2	0.979122	8.10552e-07	Cenpa	NONRATT005357.2
ENSRNOT00000077899	NONRATT005357.2	0.979115	8.11642e-07	Mastl	NONRATT005357.2
ENSRNOT00000065721	NONRATT016045.2	0.97911	8.12407e-07	Sgol1	NONRATT016045.2
ENSRNOT00000002085	NONRATT003292.2	0.979104	8.13318e-07	Hat1	NONRATT003292.2
ENSRNOT00000082846	NONRATT015585.2	0.979093	8.15092e-07	Ccnb1	NONRATT015585.2
ENSRNOT00000017314	NONRATT008580.2	0.979063	8.19811e-07	Espl1	NONRATT008580.2
ENSRNOT00000036702	NONRATT016047.2	0.979049	8.21913e-07	Cenpt	NONRATT016047.2
ENSRNOT00000016828	NONRATT001466.2	0.979048	8.22019e-07	Prim2	NONRATT001466.2
ENSRNOT00000083151	NONRATT001466.2	0.979045	8.22491e-07	Ttk	NONRATT001466.2
ENSRNOT00000035383	NONRATT001466.2	0.97904	8.2328e-07	Pmf1	NONRATT001466.2
ENSRNOT00000084445	NONRATT016047.2	0.979035	8.24153e-07	Cenpn	NONRATT016047.2
ENSRNOT00000017081	NONRATT008570.2	0.979025	8.25754e-07	Mcm3	NONRATT008570.2
ENSRNOT00000028898	NONRATT015583.2	0.97902	8.26495e-07	Mcm8	NONRATT015583.2
ENSRNOT00000081970	NONRATT013044.2	0.979017	8.26921e-07	LOC103690190	NONRATT013044.2
ENSRNOT00000017314	NONRATT011088.2	0.97901	8.27972e-07	Espl1	NONRATT011088.2
ENSRNOT00000028406	NONRATT018551.2	0.978975	8.33592e-07	Pola2	NONRATT018551.2
ENSRNOT00000008492	NONRATT016047.2	0.978964	8.35341e-07	Aurkb	NONRATT016047.2
ENSRNOT00000085591	NONRATT005180.2	0.978951	8.37287e-07	Chek2	NONRATT005180.2
ENSRNOT00000028898	NONRATT016047.2	0.978944	8.38436e-07	Mcm8	NONRATT016047.2
ENSRNOT00000037444	NONRATT014026.2	0.978943	8.38516e-07	Mis18a	NONRATT014026.2
ENSRNOT00000067453	NONRATT016045.2	0.978918	8.42568e-07	Pole	NONRATT016045.2
ENSRNOT00000073188	NONRATT012480.2	0.978916	8.42872e-07	Hist1h2ail1	NONRATT012480.2
ENSRNOT00000002066	NONRATT008580.2	0.978902	8.45029e-07	Cdca7	NONRATT008580.2
ENSRNOT00000074148	NONRATT030132.2	0.978899	8.45566e-07	Lin9	NONRATT030132.2
ENSRNOT00000063990	NONRATT003292.2	0.978874	8.49546e-07	Kntc1	NONRATT003292.2
ENSRNOT00000039344	NONRATT014811.2	0.978865	8.51077e-07	Bora	NONRATT014811.2
ENSRNOT00000001444	NONRATT016047.2	0.978863	8.51286e-07	Rfc3	NONRATT016047.2
ENSRNOT00000019234	NONRATT016047.2	0.978862	8.51532e-07	Cks2	NONRATT016047.2
ENSRNOT00000022133	TCONS_00010418	0.978854	8.52793e-07	Cep55	TCONS_00010418
ENSRNOT00000035255	NONRATT030261.2	0.978851	8.53322e-07	Ncapg2	NONRATT030261.2
ENSRNOT00000084445	NONRATT016343.2	0.978837	8.55467e-07	Cenpn	NONRATT016343.2
ENSRNOT00000016157	NONRATT003292.2	0.97883	8.56554e-07	Ncaph	NONRATT003292.2
ENSRNOT00000019799	NONRATT033405.1	0.97883	8.56574e-07	Lig1	NONRATT033405.1
ENSRNOT00000016157	NONRATT008517.2	0.978828	8.56971e-07	Ncaph	NONRATT008517.2
ENSRNOT00000015651	NONRATT003292.2	0.978827	8.5702e-07	Spag5	NONRATT003292.2
ENSRNOT00000021156	TCONS_00010418	0.978826	8.57257e-07	Ccna2	TCONS_00010418
ENSRNOT00000034565	NONRATT030261.2	0.978824	8.57561e-07	Cenpe	NONRATT030261.2
ENSRNOT00000031163	NONRATT027850.2	0.978819	8.5834e-07	Cdca2	NONRATT027850.2
ENSRNOT00000073188	NONRATT013044.2	0.97881	8.59868e-07	Hist1h2ail1	NONRATT013044.2
ENSRNOT00000012512	NONRATT030132.2	0.978805	8.60694e-07	Cenpa	NONRATT030132.2
ENSRNOT00000015065	NONRATT016047.2	0.978803	8.61022e-07	Blm	NONRATT016047.2
ENSRNOT00000064731	NONRATT029261.2	0.9788	8.61374e-07	Mcm5	NONRATT029261.2
ENSRNOT00000071107	NONRATT028358.2	0.978795	8.62262e-07	Chaf1a	NONRATT028358.2
ENSRNOT00000084445	TCONS_00010418	0.978795	8.62277e-07	Cenpn	TCONS_00010418
ENSRNOT00000065349	NONRATT033407.1	0.978785	8.63829e-07	Kifc1	NONRATT033407.1
ENSRNOT00000083111	NONRATT018485.2	0.978762	8.67581e-07	Brca1	NONRATT018485.2
ENSRNOT00000022256	NONRATT003292.2	0.978752	8.69299e-07	Ns5atp9	NONRATT003292.2
ENSRNOT00000016828	NONRATT005180.2	0.978733	8.72255e-07	Prim2	NONRATT005180.2
ENSRNOT00000049967	NONRATT018552.2	0.978721	8.74348e-07	Atr	NONRATT018552.2
ENSRNOT00000004525	NONRATT030261.2	0.978716	8.75162e-07	Cenpf	NONRATT030261.2
ENSRNOT00000022256	NONRATT018485.2	0.978714	8.75406e-07	Ns5atp9	NONRATT018485.2
ENSRNOT00000004525	NONRATT015583.2	0.978712	8.75809e-07	Cenpf	NONRATT015583.2
ENSRNOT00000004525	NONRATT016045.2	0.97871	8.7604e-07	Cenpf	NONRATT016045.2
ENSRNOT00000008254	NONRATT008517.2	0.978709	8.7629e-07	Dsn1	NONRATT008517.2
ENSRNOT00000047420	NONRATT008517.2	0.978701	8.77468e-07	Palb2	NONRATT008517.2
ENSRNOT00000017549	NONRATT016047.2	0.978699	8.77871e-07	Rpa2	NONRATT016047.2
ENSRNOT00000020803	NONRATT016047.2	0.978697	8.78125e-07	Cdca3	NONRATT016047.2
ENSRNOT00000065593	NONRATT003292.2	0.978685	8.80179e-07	Prim1	NONRATT003292.2
ENSRNOT00000011226	NONRATT004419.2	0.978682	8.80684e-07	Stt3a	NONRATT004419.2
ENSRNOT00000035383	NONRATT018485.2	0.978675	8.8183e-07	Pmf1	NONRATT018485.2
ENSRNOT00000074148	NONRATT027850.2	0.978666	8.83219e-07	Lin9	NONRATT027850.2
ENSRNOT00000083016	NONRATT018485.2	0.978655	8.85145e-07	Ncapd2	NONRATT018485.2
ENSRNOT00000065349	NONRATT018485.2	0.978644	8.86877e-07	Kifc1	NONRATT018485.2
ENSRNOT00000019799	NONRATT009960.2	0.978637	8.8813e-07	Lig1	NONRATT009960.2
ENSRNOT00000012404	NONRATT015583.2	0.978596	8.9493e-07	Zwilch	NONRATT015583.2
ENSRNOT00000008492	TCONS_00021565	0.978595	8.95035e-07	Aurkb	TCONS_00021565
ENSRNOT00000006964	NONRATT027850.2	0.978588	8.96169e-07	Asf1b	NONRATT027850.2
ENSRNOT00000016157	TCONS_00021565	0.978581	8.97282e-07	Ncaph	TCONS_00021565
ENSRNOT00000055102	NONRATT029356.2	0.978579	8.97618e-07	Aurka	NONRATT029356.2
ENSRNOT00000002085	NONRATT029356.2	0.978578	8.97864e-07	Hat1	NONRATT029356.2
ENSRNOT00000051783	NONRATT018439.2	0.978568	8.99474e-07	Bub1	NONRATT018439.2
ENSRNOT00000072387	NONRATT008517.2	0.978551	9.0244e-07	Birc5	NONRATT008517.2
ENSRNOT00000065677	TCONS_00010418	0.97855	9.02618e-07	Cenpw	TCONS_00010418
ENSRNOT00000012088	NONRATT016343.2	0.978549	9.02692e-07	Cdkn2c	NONRATT016343.2
ENSRNOT00000020803	TCONS_00010418	0.978539	9.04373e-07	Cdca3	TCONS_00010418
ENSRNOT00000008492	NONRATT033405.1	0.978533	9.05319e-07	Aurkb	NONRATT033405.1
ENSRNOT00000015065	NONRATT001466.2	0.978523	9.07035e-07	Blm	NONRATT001466.2
ENSRNOT00000075997	NONRATT018485.2	0.978523	9.0704e-07	Pola1	NONRATT018485.2
ENSRNOT00000008254	NONRATT015583.2	0.978497	9.11453e-07	Dsn1	NONRATT015583.2
ENSRNOT00000012404	NONRATT033407.1	0.978491	9.12501e-07	Zwilch	NONRATT033407.1
ENSRNOT00000038176	NONRATT033405.1	0.978484	9.13666e-07	Mki67	NONRATT033405.1
ENSRNOT00000008254	NONRATT027850.2	0.978472	9.15626e-07	Dsn1	NONRATT027850.2
ENSRNOT00000001444	NONRATT001466.2	0.978455	9.18566e-07	Rfc3	NONRATT001466.2
ENSRNOT00000068520	NONRATT008570.2	0.978435	9.21927e-07	Cdc7	NONRATT008570.2
ENSRNOT00000025903	NONRATT018439.2	0.978428	9.23138e-07	Kif2c	NONRATT018439.2
ENSRNOT00000084128	NONRATT030132.2	0.978426	9.23533e-07	Kif18b	NONRATT030132.2
ENSRNOT00000008837	NONRATT029356.2	0.978417	9.2499e-07	Spc25	NONRATT029356.2
ENSRNOT00000065593	NONRATT005180.2	0.978403	9.2745e-07	Prim1	NONRATT005180.2
ENSRNOT00000077899	NONRATT003292.2	0.978395	9.288e-07	Mastl	NONRATT003292.2
ENSRNOT00000008254	NONRATT030132.2	0.978366	9.33612e-07	Dsn1	NONRATT030132.2
ENSRNOT00000091172	NONRATT001466.2	0.978357	9.35301e-07	Brip1	NONRATT001466.2
ENSRNOT00000091688	NONRATT012480.2	0.978344	9.37441e-07	Hist1h1b	NONRATT012480.2
ENSRNOT00000000783	NONRATT003292.2	0.978321	9.41422e-07	Cdk1	NONRATT003292.2
ENSRNOT00000025629	NONRATT015583.2	0.978317	9.42174e-07	Plk1	NONRATT015583.2
ENSRNOT00000084445	TCONS_00021565	0.978312	9.43054e-07	Cenpn	TCONS_00021565
ENSRNOT00000028109	NONRATT003289.2	0.97831	9.433e-07	Brca1	NONRATT003289.2
ENSRNOT00000017635	NONRATT005180.2	0.978308	9.43611e-07	Hmgb2l1	NONRATT005180.2
ENSRNOT00000091172	NONRATT033407.1	0.978293	9.46307e-07	Brip1	NONRATT033407.1
ENSRNOT00000028898	NONRATT003289.2	0.97829	9.46719e-07	Mcm8	NONRATT003289.2
ENSRNOT00000017081	NONRATT028358.2	0.978285	9.47744e-07	Mcm3	NONRATT028358.2
ENSRNOT00000073188	NONRATT005336.2	0.978284	9.47757e-07	Hist1h2ail1	NONRATT005336.2
ENSRNOT00000021156	NONRATT033405.1	0.97828	9.48526e-07	Ccna2	NONRATT033405.1
ENSRNOT00000079726	NONRATT029356.2	0.978279	9.48749e-07	Kif11	NONRATT029356.2
ENSRNOT00000002487	NONRATT016047.2	0.978266	9.50916e-07	Rfc4	NONRATT016047.2
ENSRNOT00000068623	NONRATT018485.2	0.978255	9.52833e-07	Nsl1	NONRATT018485.2
ENSRNOT00000017314	NONRATT033405.1	0.978236	9.56156e-07	Espl1	NONRATT033405.1
ENSRNOT00000084271	NONRATT003289.2	0.978214	9.59969e-07	Mcm5	NONRATT003289.2
ENSRNOT00000002066	NONRATT028358.2	0.978201	9.6228e-07	Cdca7	NONRATT028358.2
ENSRNOT00000003650	TCONS_00021565	0.978198	9.62787e-07	Nuf2	TCONS_00021565
ENSRNOT00000065721	NONRATT028358.2	0.978197	9.63045e-07	Sgol1	NONRATT028358.2
ENSRNOT00000002487	TCONS_00010418	0.978193	9.63689e-07	Rfc4	TCONS_00010418
ENSRNOT00000010406	NONRATT003292.2	0.978191	9.64045e-07	Bub1b	NONRATT003292.2
ENSRNOT00000084445	NONRATT018485.2	0.978189	9.64467e-07	Cenpn	NONRATT018485.2
ENSRNOT00000083151	NONRATT005357.2	0.978184	9.65367e-07	Ttk	NONRATT005357.2
ENSRNOT00000031074	NONRATT017519.2	0.978176	9.6673e-07	Cenpc	NONRATT017519.2
ENSRNOT00000037444	NONRATT009960.2	0.978175	9.66811e-07	Mis18a	NONRATT009960.2
ENSRNOT00000039344	NONRATT018439.2	0.978173	9.67154e-07	Bora	NONRATT018439.2
ENSRNOT00000091551	NONRATT016047.2	0.978172	9.67371e-07	Rrm2	NONRATT016047.2
ENSRNOT00000048293	NONRATT015583.2	0.978165	9.68582e-07	Cdca8	NONRATT015583.2
ENSRNOT00000006964	NONRATT018485.2	0.978162	9.69118e-07	Asf1b	NONRATT018485.2
ENSRNOT00000025629	NONRATT030261.2	0.978161	9.69363e-07	Plk1	NONRATT030261.2
ENSRNOT00000083340	NONRATT008580.2	0.97814	9.73063e-07	Cdk5rap2	NONRATT008580.2
ENSRNOT00000051783	NONRATT001466.2	0.978127	9.75306e-07	Bub1	NONRATT001466.2
ENSRNOT00000012088	NONRATT008570.2	0.978125	9.75633e-07	Cdkn2c	NONRATT008570.2
ENSRNOT00000055102	NONRATT003292.2	0.978121	9.76406e-07	Aurka	NONRATT003292.2
ENSRNOT00000002487	NONRATT030132.2	0.978103	9.7968e-07	Rfc4	NONRATT030132.2
ENSRNOT00000011226	NONRATT003289.2	0.978088	9.8235e-07	Stt3a	NONRATT003289.2
ENSRNOT00000024301	NONRATT030261.2	0.978087	9.8244e-07	Gins4	NONRATT030261.2
ENSRNOT00000077899	NONRATT030261.2	0.978075	9.84686e-07	Mastl	NONRATT030261.2
ENSRNOT00000035383	NONRATT028358.2	0.978037	9.91439e-07	Pmf1	NONRATT028358.2
ENSRNOT00000051783	NONRATT022152.2	0.978035	9.9169e-07	Bub1	NONRATT022152.2
ENSRNOT00000029416	NONRATT016047.2	0.978026	9.93382e-07	Fbxo5	NONRATT016047.2
ENSRNOT00000012404	NONRATT009960.2	0.978013	9.95719e-07	Zwilch	NONRATT009960.2
ENSRNOT00000001444	NONRATT028358.2	0.978002	9.97646e-07	Rfc3	NONRATT028358.2
ENSRNOT00000016828	NONRATT018485.2	0.978002	9.97731e-07	Prim2	NONRATT018485.2
ENSRNOT00000082846	NONRATT003292.2	0.977998	9.98397e-07	Ccnb1	NONRATT003292.2
ENSRNOT00000052312	TCONS_00010418	0.977992	9.99555e-07	Nusap1	TCONS_00010418
ENSRNOT00000084128	NONRATT030261.2	0.977989	1.00001e-06	Kif18b	NONRATT030261.2
ENSRNOT00000087132	NONRATT029356.2	0.977989	1.00006e-06	Rad51b	NONRATT029356.2
ENSRNOT00000018644	NONRATT033407.1	0.977989	1.00008e-06	Ndc80	NONRATT033407.1
ENSRNOT00000008254	NONRATT033405.1	0.97798	1.00167e-06	Dsn1	NONRATT033405.1
ENSRNOT00000068520	NONRATT016045.2	0.977974	1.00271e-06	Cdc7	NONRATT016045.2
ENSRNOT00000017532	NONRATT030132.2	0.977973	1.00297e-06	Prc1	NONRATT030132.2
ENSRNOT00000072493	NONRATT018485.2	0.977962	1.00487e-06	Cdca5	NONRATT018485.2
ENSRNOT00000082618	TCONS_00021565	0.977952	1.00674e-06	Fancd2	TCONS_00021565
ENSRNOT00000083151	NONRATT029356.2	0.977944	1.00824e-06	Ttk	NONRATT029356.2
ENSRNOT00000065593	NONRATT033405.1	0.977938	1.00926e-06	Prim1	NONRATT033405.1
ENSRNOT00000052312	NONRATT022152.2	0.977923	1.01192e-06	Nusap1	NONRATT022152.2
ENSRNOT00000012088	NONRATT001466.2	0.977919	1.01277e-06	Cdkn2c	NONRATT001466.2
ENSRNOT00000022133	NONRATT001466.2	0.977918	1.01289e-06	Cep55	NONRATT001466.2
ENSRNOT00000021320	NONRATT023053.2	0.977894	1.01728e-06	Esco2	NONRATT023053.2
ENSRNOT00000012088	NONRATT005335.2	0.97789	1.018e-06	Cdkn2c	NONRATT005335.2
ENSRNOT00000084128	NONRATT024911.2	0.977881	1.01967e-06	Kif18b	NONRATT024911.2
ENSRNOT00000011226	NONRATT028358.2	0.977866	1.02246e-06	Stt3a	NONRATT028358.2
ENSRNOT00000017314	NONRATT003292.2	0.977858	1.02398e-06	Espl1	NONRATT003292.2
ENSRNOT00000002510	NONRATT028358.2	0.977857	1.02402e-06	Mcm4	NONRATT028358.2
ENSRNOT00000019799	NONRATT016343.2	0.977855	1.02445e-06	Lig1	NONRATT016343.2
ENSRNOT00000015651	NONRATT016047.2	0.977849	1.0256e-06	Spag5	NONRATT016047.2
ENSRNOT00000015651	NONRATT005357.2	0.977839	1.02733e-06	Spag5	NONRATT005357.2
ENSRNOT00000010955	NONRATT030261.2	0.977837	1.02777e-06	Gins1	NONRATT030261.2
ENSRNOT00000019288	NONRATT001466.2	0.977822	1.03054e-06	Pold2	NONRATT001466.2
ENSRNOT00000019799	NONRATT018485.2	0.977775	1.0392e-06	Lig1	NONRATT018485.2
ENSRNOT00000031163	TCONS_00021565	0.977769	1.04043e-06	Cdca2	TCONS_00021565
ENSRNOT00000010025	NONRATT008580.2	0.977764	1.04135e-06	Xrcc2	NONRATT008580.2
ENSRNOT00000065349	NONRATT005180.2	0.97776	1.04204e-06	Kifc1	NONRATT005180.2
ENSRNOT00000051064	NONRATT030132.2	0.977758	1.04231e-06	Cdc25b	NONRATT030132.2
ENSRNOT00000072493	NONRATT033407.1	0.977758	1.04244e-06	Cdca5	NONRATT033407.1
ENSRNOT00000012454	NONRATT008517.2	0.977749	1.04402e-06	Knstrn	NONRATT008517.2
ENSRNOT00000025629	NONRATT018439.2	0.977719	1.04962e-06	Plk1	NONRATT018439.2
ENSRNOT00000052312	TCONS_00021565	0.977708	1.05167e-06	Nusap1	TCONS_00021565
ENSRNOT00000047420	NONRATT018485.2	0.977701	1.05312e-06	Palb2	NONRATT018485.2
ENSRNOT00000077899	NONRATT018439.2	0.977699	1.05347e-06	Mastl	NONRATT018439.2
ENSRNOT00000068520	NONRATT030261.2	0.977693	1.05449e-06	Cdc7	NONRATT030261.2
ENSRNOT00000084271	NONRATT027850.2	0.977665	1.05984e-06	Mcm5	NONRATT027850.2
ENSRNOT00000075997	NONRATT033407.1	0.97764	1.06447e-06	Pola1	NONRATT033407.1
ENSRNOT00000082846	NONRATT030132.2	0.977633	1.06587e-06	Ccnb1	NONRATT030132.2
ENSRNOT00000086806	NONRATT009960.2	0.977629	1.06667e-06	Cdk1	NONRATT009960.2
ENSRNOT00000047420	NONRATT009960.2	0.977619	1.0685e-06	Palb2	NONRATT009960.2
ENSRNOT00000010406	NONRATT030261.2	0.977616	1.06905e-06	Bub1b	NONRATT030261.2
ENSRNOT00000029416	NONRATT005180.2	0.977584	1.07512e-06	Fbxo5	NONRATT005180.2
ENSRNOT00000072493	NONRATT027850.2	0.977569	1.07809e-06	Cdca5	NONRATT027850.2
ENSRNOT00000032723	NONRATT033407.1	0.977568	1.07818e-06	Ska3	NONRATT033407.1
ENSRNOT00000015065	NONRATT005357.2	0.977561	1.07949e-06	Blm	NONRATT005357.2
ENSRNOT00000052312	NONRATT016047.2	0.977555	1.08066e-06	Nusap1	NONRATT016047.2
ENSRNOT00000065593	NONRATT030132.2	0.977541	1.08338e-06	Prim1	NONRATT030132.2
ENSRNOT00000077899	TCONS_00010418	0.97754	1.08355e-06	Mastl	TCONS_00010418
ENSRNOT00000052312	NONRATT014982.2	0.977525	1.08646e-06	Nusap1	NONRATT014982.2
ENSRNOT00000086806	NONRATT001466.2	0.977525	1.08649e-06	Cdk1	NONRATT001466.2
ENSRNOT00000036151	NONRATT018439.2	0.97751	1.08934e-06	Cdc20	NONRATT018439.2
ENSRNOT00000017081	NONRATT027850.2	0.977509	1.0895e-06	Mcm3	NONRATT027850.2
ENSRNOT00000022256	NONRATT005180.2	0.977507	1.08983e-06	Ns5atp9	NONRATT005180.2
ENSRNOT00000051612	NONRATT030261.2	0.97748	1.09505e-06	Ttk	NONRATT030261.2
ENSRNOT00000074058	NONRATT018439.2	0.977464	1.09827e-06	Rrm1	NONRATT018439.2
ENSRNOT00000075997	NONRATT016343.2	0.977458	1.09946e-06	Pola1	NONRATT016343.2
ENSRNOT00000021320	NONRATT006811.2	0.97745	1.10087e-06	Esco2	NONRATT006811.2
ENSRNOT00000063995	NONRATT015583.2	0.97745	1.10094e-06	Polq	NONRATT015583.2
ENSRNOT00000012985	NONRATT029356.2	0.977449	1.10118e-06	Cdkn3	NONRATT029356.2
ENSRNOT00000086806	NONRATT008570.2	0.977446	1.10173e-06	Cdk1	NONRATT008570.2
ENSRNOT00000018644	NONRATT022152.2	0.977434	1.10399e-06	Ndc80	NONRATT022152.2
ENSRNOT00000036702	NONRATT015583.2	0.977428	1.10516e-06	Cenpt	NONRATT015583.2
ENSRNOT00000017314	NONRATT015583.2	0.977398	1.11098e-06	Espl1	NONRATT015583.2
ENSRNOT00000065895	NONRATT008517.2	0.977394	1.1118e-06	Myh10	NONRATT008517.2
ENSRNOT00000082618	NONRATT001466.2	0.977381	1.11437e-06	Fancd2	NONRATT001466.2
ENSRNOT00000031783	NONRATT030261.2	0.977373	1.11599e-06	Ticrr	NONRATT030261.2
ENSRNOT00000005835	NONRATT033405.1	0.97735	1.12054e-06	Pole2	NONRATT033405.1
ENSRNOT00000043387	NONRATT016045.2	0.977337	1.12294e-06	Incenp	NONRATT016045.2
ENSRNOT00000064392	NONRATT030132.2	0.97733	1.12437e-06	Ccnf	NONRATT030132.2
ENSRNOT00000036098	NONRATT027850.2	0.97732	1.12643e-06	Ska2	NONRATT027850.2
ENSRNOT00000065593	NONRATT001466.2	0.977318	1.12677e-06	Prim1	NONRATT001466.2
ENSRNOT00000010955	NONRATT033405.1	0.977288	1.13272e-06	Gins1	NONRATT033405.1
ENSRNOT00000072387	NONRATT001466.2	0.977287	1.13293e-06	Birc5	NONRATT001466.2
ENSRNOT00000002085	NONRATT027850.2	0.977276	1.13506e-06	Hat1	NONRATT027850.2
ENSRNOT00000006964	TCONS_00021565	0.977274	1.1354e-06	Asf1b	TCONS_00021565
ENSRNOT00000085591	NONRATT030132.2	0.977261	1.13799e-06	Chek2	NONRATT030132.2
ENSRNOT00000043387	NONRATT005180.2	0.977241	1.14198e-06	Incenp	NONRATT005180.2
ENSRNOT00000068520	NONRATT028358.2	0.977212	1.14786e-06	Cdc7	NONRATT028358.2
ENSRNOT00000064824	NONRATT008517.2	0.977185	1.15323e-06	Rbl1	NONRATT008517.2
ENSRNOT00000079726	NONRATT016045.2	0.977175	1.15534e-06	Kif11	NONRATT016045.2
ENSRNOT00000025903	NONRATT005180.2	0.977161	1.15812e-06	Kif2c	NONRATT005180.2
ENSRNOT00000019288	NONRATT010050.2	0.977158	1.15863e-06	Pold2	NONRATT010050.2
ENSRNOT00000035383	NONRATT033407.1	0.977147	1.16086e-06	Pmf1	NONRATT033407.1
ENSRNOT00000005576	NONRATT008570.2	0.977132	1.16397e-06	Dtl	NONRATT008570.2
ENSRNOT00000029416	NONRATT030261.2	0.977112	1.1679e-06	Fbxo5	NONRATT030261.2
ENSRNOT00000010696	NONRATT016045.2	0.977101	1.17024e-06	Ccne2	NONRATT016045.2
ENSRNOT00000036151	NONRATT005180.2	0.977094	1.17159e-06	Cdc20	NONRATT005180.2
ENSRNOT00000038176	NONRATT005357.2	0.977092	1.172e-06	Mki67	NONRATT005357.2
ENSRNOT00000032972	TCONS_00021565	0.977087	1.17295e-06	Tacc3	TCONS_00021565
ENSRNOT00000012512	NONRATT015583.2	0.977087	1.17295e-06	Cenpa	NONRATT015583.2
ENSRNOT00000000783	NONRATT016047.2	0.977077	1.17502e-06	Cdk1	NONRATT016047.2
ENSRNOT00000017532	NONRATT029356.2	0.977076	1.17537e-06	Prc1	NONRATT029356.2
ENSRNOT00000089178	NONRATT005357.2	0.97707	1.17658e-06	Skp2	NONRATT005357.2
ENSRNOT00000036098	NONRATT005357.2	0.977054	1.17976e-06	Ska2	NONRATT005357.2
ENSRNOT00000043387	NONRATT033407.1	0.977049	1.18078e-06	Incenp	NONRATT033407.1
ENSRNOT00000091172	NONRATT011088.2	0.977047	1.18117e-06	Brip1	NONRATT011088.2
ENSRNOT00000083848	NONRATT015583.2	0.977041	1.18238e-06	Uhrf1	NONRATT015583.2
ENSRNOT00000083016	NONRATT024911.2	0.977027	1.18523e-06	Ncapd2	NONRATT024911.2
ENSRNOT00000091016	NONRATT018439.2	0.977024	1.18581e-06	Aurkb	NONRATT018439.2
ENSRNOT00000081970	NONRATT012480.2	0.977022	1.18635e-06	LOC103690190	NONRATT012480.2
ENSRNOT00000065677	NONRATT022152.2	0.977016	1.18752e-06	Cenpw	NONRATT022152.2
ENSRNOT00000010955	TCONS_00021565	0.977002	1.19039e-06	Gins1	TCONS_00021565
ENSRNOT00000085176	NONRATT003292.2	0.976989	1.19304e-06	Kif18a	NONRATT003292.2
ENSRNOT00000038176	NONRATT022152.2	0.976987	1.19349e-06	Mki67	NONRATT022152.2
ENSRNOT00000081424	NONRATT008570.2	0.976965	1.19813e-06	Cdc6	NONRATT008570.2
ENSRNOT00000051065	NONRATT024911.2	0.976961	1.19879e-06	Hjurp	NONRATT024911.2
ENSRNOT00000068623	NONRATT016047.2	0.976956	1.19994e-06	Nsl1	NONRATT016047.2
ENSRNOT00000036151	NONRATT029356.2	0.976951	1.20092e-06	Cdc20	NONRATT029356.2
ENSRNOT00000017635	NONRATT003292.2	0.976951	1.20103e-06	Hmgb2l1	NONRATT003292.2
ENSRNOT00000055102	NONRATT001466.2	0.97695	1.20111e-06	Aurka	NONRATT001466.2
ENSRNOT00000001475	NONRATT016045.2	0.97693	1.20525e-06	Brca2	NONRATT016045.2
ENSRNOT00000079726	NONRATT001466.2	0.976921	1.20723e-06	Kif11	NONRATT001466.2
ENSRNOT00000075997	NONRATT030132.2	0.976915	1.20842e-06	Pola1	NONRATT030132.2
ENSRNOT00000039344	NONRATT005180.2	0.976914	1.20859e-06	Bora	NONRATT005180.2
ENSRNOT00000001475	NONRATT003289.2	0.976901	1.2114e-06	Brca2	NONRATT003289.2
ENSRNOT00000008492	NONRATT001466.2	0.976874	1.21703e-06	Aurkb	NONRATT001466.2
ENSRNOT00000007285	NONRATT033405.1	0.97687	1.21774e-06	Mad2l1	NONRATT033405.1
ENSRNOT00000068520	NONRATT008580.2	0.976867	1.21836e-06	Cdc7	NONRATT008580.2
ENSRNOT00000048293	TCONS_00021565	0.976856	1.22072e-06	Cdca8	TCONS_00021565
ENSRNOT00000091688	NONRATT012540.2	0.976844	1.22317e-06	Hist1h1b	NONRATT012540.2
ENSRNOT00000085344	NONRATT033405.1	0.976841	1.22384e-06	Top2a	NONRATT033405.1
ENSRNOT00000021156	NONRATT030132.2	0.97684	1.22401e-06	Ccna2	NONRATT030132.2
ENSRNOT00000000783	NONRATT033407.1	0.976834	1.22536e-06	Cdk1	NONRATT033407.1
ENSRNOT00000004969	NONRATT004419.2	0.976833	1.22546e-06	Mcm6	NONRATT004419.2
ENSRNOT00000007285	NONRATT008570.2	0.976833	1.22555e-06	Mad2l1	NONRATT008570.2
ENSRNOT00000019799	NONRATT016045.2	0.976827	1.22677e-06	Lig1	NONRATT016045.2
ENSRNOT00000013790	NONRATT015584.2	0.97682	1.22824e-06	Hist1h2ah	NONRATT015584.2
ENSRNOT00000074058	NONRATT016045.2	0.976818	1.22878e-06	Rrm1	NONRATT016045.2
ENSRNOT00000010025	NONRATT018439.2	0.976816	1.22912e-06	Xrcc2	NONRATT018439.2
ENSRNOT00000035383	NONRATT005180.2	0.976803	1.2319e-06	Pmf1	NONRATT005180.2
ENSRNOT00000005576	NONRATT005180.2	0.976794	1.23378e-06	Dtl	NONRATT005180.2
ENSRNOT00000051064	NONRATT008517.2	0.976791	1.23449e-06	Cdc25b	NONRATT008517.2
ENSRNOT00000035255	NONRATT005357.2	0.976783	1.23616e-06	Ncapg2	NONRATT005357.2
ENSRNOT00000018644	NONRATT005357.2	0.976747	1.2438e-06	Ndc80	NONRATT005357.2
ENSRNOT00000032723	NONRATT008580.2	0.976701	1.25355e-06	Ska3	NONRATT008580.2
ENSRNOT00000037444	NONRATT028358.2	0.976701	1.2536e-06	Mis18a	NONRATT028358.2
ENSRNOT00000085591	NONRATT033405.1	0.976688	1.25633e-06	Chek2	NONRATT033405.1
ENSRNOT00000085176	NONRATT016045.2	0.976686	1.25677e-06	Kif18a	NONRATT016045.2
ENSRNOT00000012512	NONRATT033407.1	0.976676	1.25878e-06	Cenpa	NONRATT033407.1
ENSRNOT00000035255	NONRATT005335.2	0.97667	1.26019e-06	Ncapg2	NONRATT005335.2
ENSRNOT00000085176	NONRATT001466.2	0.976664	1.26147e-06	Kif18a	NONRATT001466.2
ENSRNOT00000001444	NONRATT016343.2	0.976661	1.262e-06	Rfc3	NONRATT016343.2
ENSRNOT00000005857	NONRATT005357.2	0.976657	1.26293e-06	Fignl1	NONRATT005357.2
ENSRNOT00000076451	NONRATT001466.2	0.976655	1.26331e-06	Esco2	NONRATT001466.2
ENSRNOT00000007285	NONRATT026936.2	0.976652	1.26397e-06	Mad2l1	NONRATT026936.2
ENSRNOT00000001444	NONRATT003289.2	0.976648	1.26487e-06	Rfc3	NONRATT003289.2
ENSRNOT00000002085	NONRATT030261.2	0.976644	1.26567e-06	Hat1	NONRATT030261.2
ENSRNOT00000024301	NONRATT018485.2	0.976628	1.26923e-06	Gins4	NONRATT018485.2
ENSRNOT00000076451	NONRATT016045.2	0.976626	1.26952e-06	Esco2	NONRATT016045.2
ENSRNOT00000036151	NONRATT001466.2	0.976625	1.26991e-06	Cdc20	NONRATT001466.2
ENSRNOT00000047420	NONRATT001466.2	0.976624	1.27e-06	Palb2	NONRATT001466.2
ENSRNOT00000083151	NONRATT027850.2	0.976616	1.27184e-06	Ttk	NONRATT027850.2
ENSRNOT00000019234	NONRATT008580.2	0.976613	1.27233e-06	Cks2	NONRATT008580.2
ENSRNOT00000065349	NONRATT004419.2	0.976598	1.27558e-06	Kifc1	NONRATT004419.2
ENSRNOT00000010406	NONRATT016045.2	0.976583	1.27902e-06	Bub1b	NONRATT016045.2
ENSRNOT00000043387	NONRATT027850.2	0.976579	1.27984e-06	Incenp	NONRATT027850.2
ENSRNOT00000022256	NONRATT033407.1	0.976563	1.28335e-06	Ns5atp9	NONRATT033407.1
ENSRNOT00000085591	NONRATT008570.2	0.976559	1.28408e-06	Chek2	NONRATT008570.2
ENSRNOT00000032723	NONRATT028358.2	0.976557	1.28464e-06	Ska3	NONRATT028358.2
ENSRNOT00000036702	NONRATT018439.2	0.976554	1.28517e-06	Cenpt	NONRATT018439.2
ENSRNOT00000008492	NONRATT029356.2	0.976553	1.2855e-06	Aurkb	NONRATT029356.2
ENSRNOT00000055102	TCONS_00010418	0.97655	1.28619e-06	Aurka	TCONS_00010418
ENSRNOT00000077899	NONRATT022152.2	0.97655	1.2862e-06	Mastl	NONRATT022152.2
ENSRNOT00000084271	NONRATT028358.2	0.976534	1.28956e-06	Mcm5	NONRATT028358.2
ENSRNOT00000025389	NONRATT003289.2	0.976529	1.29059e-06	Gmnn	NONRATT003289.2
ENSRNOT00000046798	NONRATT033407.1	0.976526	1.29132e-06	Mdc1	NONRATT033407.1
ENSRNOT00000031163	TCONS_00010418	0.976511	1.29452e-06	Cdca2	TCONS_00010418
ENSRNOT00000071107	NONRATT030261.2	0.976499	1.29727e-06	Chaf1a	NONRATT030261.2
ENSRNOT00000064392	NONRATT030261.2	0.976493	1.29854e-06	Ccnf	NONRATT030261.2
ENSRNOT00000065895	NONRATT032352.1	0.97648	1.30151e-06	Myh10	NONRATT032352.1
ENSRNOT00000083111	NONRATT015583.2	0.976468	1.30413e-06	Brca1	NONRATT015583.2
ENSRNOT00000034565	NONRATT018439.2	0.976465	1.30476e-06	Cenpe	NONRATT018439.2
ENSRNOT00000085591	NONRATT008580.2	0.976433	1.31176e-06	Chek2	NONRATT008580.2
ENSRNOT00000087132	NONRATT001466.2	0.976432	1.31191e-06	Rad51b	NONRATT001466.2
ENSRNOT00000025903	NONRATT024911.2	0.976431	1.31227e-06	Kif2c	NONRATT024911.2
ENSRNOT00000028109	NONRATT008517.2	0.976416	1.31561e-06	Brca1	NONRATT008517.2
ENSRNOT00000036151	NONRATT015583.2	0.976408	1.31736e-06	Cdc20	NONRATT015583.2
ENSRNOT00000011226	NONRATT027850.2	0.976403	1.3184e-06	Stt3a	NONRATT027850.2
ENSRNOT00000038176	NONRATT005335.2	0.976401	1.31877e-06	Mki67	NONRATT005335.2
ENSRNOT00000017635	NONRATT030261.2	0.976397	1.31979e-06	Hmgb2l1	NONRATT030261.2
ENSRNOT00000008254	NONRATT003292.2	0.97639	1.32141e-06	Dsn1	NONRATT003292.2
ENSRNOT00000064824	NONRATT003557.2	0.976389	1.32148e-06	Rbl1	NONRATT003557.2
ENSRNOT00000032723	NONRATT003289.2	0.976384	1.32271e-06	Ska3	NONRATT003289.2
ENSRNOT00000055102	NONRATT008517.2	0.976378	1.32388e-06	Aurka	NONRATT008517.2
ENSRNOT00000051065	NONRATT009960.2	0.976369	1.326e-06	Hjurp	NONRATT009960.2
ENSRNOT00000080498	NONRATT008517.2	0.976361	1.32773e-06	Ndc80	NONRATT008517.2
ENSRNOT00000034565	NONRATT008517.2	0.976355	1.32921e-06	Cenpe	NONRATT008517.2
ENSRNOT00000020014	NONRATT001466.2	0.97635	1.33018e-06	Ccne1	NONRATT001466.2
ENSRNOT00000079726	NONRATT022152.2	0.976331	1.33441e-06	Kif11	NONRATT022152.2
ENSRNOT00000066277	NONRATT027850.2	0.976328	1.33505e-06	Melk	NONRATT027850.2
ENSRNOT00000022977	NONRATT024911.2	0.976314	1.33834e-06	Ube2s	NONRATT024911.2
ENSRNOT00000085591	NONRATT029356.2	0.976303	1.34086e-06	Chek2	NONRATT029356.2
ENSRNOT00000083151	NONRATT005180.2	0.976295	1.34262e-06	Ttk	NONRATT005180.2
ENSRNOT00000028898	NONRATT022152.2	0.976294	1.34274e-06	Mcm8	NONRATT022152.2
ENSRNOT00000006964	NONRATT003289.2	0.97629	1.3436e-06	Asf1b	NONRATT003289.2
ENSRNOT00000020803	NONRATT015585.2	0.976274	1.34717e-06	Cdca3	NONRATT015585.2
ENSRNOT00000037444	NONRATT029356.2	0.976265	1.34922e-06	Mis18a	NONRATT029356.2
ENSRNOT00000002487	NONRATT008517.2	0.976259	1.35075e-06	Rfc4	NONRATT008517.2
ENSRNOT00000047420	NONRATT003289.2	0.976256	1.35123e-06	Palb2	NONRATT003289.2
ENSRNOT00000010025	NONRATT005357.2	0.976256	1.35139e-06	Xrcc2	NONRATT005357.2
ENSRNOT00000048293	NONRATT003292.2	0.976252	1.35219e-06	Cdca8	NONRATT003292.2
ENSRNOT00000071107	NONRATT016045.2	0.976215	1.36064e-06	Chaf1a	NONRATT016045.2
ENSRNOT00000028887	NONRATT008570.2	0.976211	1.36157e-06	Pcna	NONRATT008570.2
ENSRNOT00000086806	NONRATT016045.2	0.976193	1.3657e-06	Cdk1	NONRATT016045.2
ENSRNOT00000035383	NONRATT005357.2	0.976186	1.36731e-06	Pmf1	NONRATT005357.2
ENSRNOT00000025903	NONRATT016045.2	0.976182	1.36808e-06	Kif2c	NONRATT016045.2
ENSRNOT00000006235	NONRATT015585.2	0.976144	1.37676e-06	Nek2l1	NONRATT015585.2
ENSRNOT00000089178	NONRATT008517.2	0.976141	1.37745e-06	Skp2	NONRATT008517.2
ENSRNOT00000083111	NONRATT003292.2	0.976138	1.37824e-06	Brca1	NONRATT003292.2
ENSRNOT00000084271	NONRATT008580.2	0.976134	1.37918e-06	Mcm5	NONRATT008580.2
ENSRNOT00000077823	NONRATT010050.2	0.976127	1.38064e-06	Incenp	NONRATT010050.2
ENSRNOT00000010406	NONRATT027850.2	0.976126	1.38099e-06	Bub1b	NONRATT027850.2
ENSRNOT00000008837	NONRATT005180.2	0.976116	1.38333e-06	Spc25	NONRATT005180.2
ENSRNOT00000005835	TCONS_00021565	0.976108	1.38507e-06	Pole2	TCONS_00021565
ENSRNOT00000067453	NONRATT030132.2	0.976107	1.38526e-06	Pole	NONRATT030132.2
ENSRNOT00000065593	NONRATT029356.2	0.976105	1.38576e-06	Prim1	NONRATT029356.2
ENSRNOT00000022133	NONRATT003292.2	0.976103	1.38618e-06	Cep55	NONRATT003292.2
ENSRNOT00000091551	NONRATT027850.2	0.976082	1.39113e-06	Rrm2	NONRATT027850.2
ENSRNOT00000015651	NONRATT018439.2	0.97607	1.39385e-06	Spag5	NONRATT018439.2
ENSRNOT00000002066	NONRATT015585.2	0.976065	1.39496e-06	Cdca7	NONRATT015585.2
ENSRNOT00000047420	NONRATT022152.2	0.976062	1.39568e-06	Palb2	NONRATT022152.2
ENSRNOT00000065593	NONRATT015583.2	0.976055	1.39735e-06	Prim1	NONRATT015583.2
ENSRNOT00000002085	NONRATT008517.2	0.976055	1.39736e-06	Hat1	NONRATT008517.2
ENSRNOT00000000438	NONRATT028662.2	0.976018	1.40597e-06	Slc25a16	NONRATT028662.2
ENSRNOT00000006964	NONRATT001466.2	0.975996	1.41114e-06	Asf1b	NONRATT001466.2
ENSRNOT00000002299	NONRATT003289.2	0.975987	1.41317e-06	Chaf1b	NONRATT003289.2
ENSRNOT00000072027	NONRATT033407.1	0.975982	1.41433e-06	Cdc45	NONRATT033407.1
ENSRNOT00000068623	NONRATT009960.2	0.975978	1.41532e-06	Nsl1	NONRATT009960.2
ENSRNOT00000039344	NONRATT015583.2	0.975977	1.41546e-06	Bora	NONRATT015583.2
ENSRNOT00000037444	NONRATT008570.2	0.975953	1.42109e-06	Mis18a	NONRATT008570.2
ENSRNOT00000068520	NONRATT008517.2	0.975856	1.44399e-06	Cdc7	NONRATT008517.2
ENSRNOT00000071107	NONRATT008580.2	0.97584	1.44787e-06	Chaf1a	NONRATT008580.2
ENSRNOT00000047420	NONRATT030132.2	0.975837	1.44855e-06	Palb2	NONRATT030132.2
ENSRNOT00000006964	NONRATT005180.2	0.975826	1.45116e-06	Asf1b	NONRATT005180.2
ENSRNOT00000005835	NONRATT016343.2	0.975824	1.45155e-06	Pole2	NONRATT016343.2
ENSRNOT00000067453	NONRATT005335.2	0.975823	1.45185e-06	Pole	NONRATT005335.2
ENSRNOT00000008149	NONRATT010050.2	0.975822	1.4522e-06	Ezh2	NONRATT010050.2
ENSRNOT00000034565	NONRATT014026.2	0.975795	1.45855e-06	Cenpe	NONRATT014026.2
ENSRNOT00000087132	NONRATT003289.2	0.975794	1.45883e-06	Rad51b	NONRATT003289.2
ENSRNOT00000012985	NONRATT008580.2	0.975787	1.46057e-06	Cdkn3	NONRATT008580.2
ENSRNOT00000083848	NONRATT033407.1	0.975781	1.46204e-06	Uhrf1	NONRATT033407.1
ENSRNOT00000007285	NONRATT003557.2	0.975771	1.46435e-06	Mad2l1	NONRATT003557.2
ENSRNOT00000065593	NONRATT003289.2	0.975766	1.46556e-06	Prim1	NONRATT003289.2
ENSRNOT00000085591	NONRATT016343.2	0.975763	1.46612e-06	Chek2	NONRATT016343.2
ENSRNOT00000012454	NONRATT015583.2	0.975763	1.46635e-06	Knstrn	NONRATT015583.2
ENSRNOT00000039467	NONRATT008570.2	0.975755	1.46821e-06	Orc6	NONRATT008570.2
ENSRNOT00000000783	NONRATT008570.2	0.975754	1.46838e-06	Cdk1	NONRATT008570.2
ENSRNOT00000038176	NONRATT030261.2	0.975741	1.47161e-06	Mki67	NONRATT030261.2
ENSRNOT00000065721	NONRATT033405.1	0.975714	1.47814e-06	Sgol1	NONRATT033405.1
ENSRNOT00000065593	NONRATT030261.2	0.9757	1.48145e-06	Prim1	NONRATT030261.2
ENSRNOT00000017635	NONRATT016045.2	0.975699	1.48168e-06	Hmgb2l1	NONRATT016045.2
ENSRNOT00000006964	NONRATT033407.1	0.975681	1.48605e-06	Asf1b	NONRATT033407.1
ENSRNOT00000052312	NONRATT027850.2	0.975672	1.48834e-06	Nusap1	NONRATT027850.2
ENSRNOT00000010696	NONRATT005335.2	0.975663	1.49043e-06	Ccne2	NONRATT005335.2
ENSRNOT00000085176	NONRATT018485.2	0.97566	1.4911e-06	Kif18a	NONRATT018485.2
ENSRNOT00000083151	NONRATT030261.2	0.975659	1.49138e-06	Ttk	NONRATT030261.2
ENSRNOT00000047420	NONRATT005357.2	0.975654	1.49253e-06	Palb2	NONRATT005357.2
ENSRNOT00000086806	NONRATT033405.1	0.97564	1.49605e-06	Cdk1	NONRATT033405.1
ENSRNOT00000031783	NONRATT028662.2	0.975638	1.4966e-06	Ticrr	NONRATT028662.2
ENSRNOT00000008837	NONRATT003292.2	0.975637	1.49663e-06	Spc25	NONRATT003292.2
ENSRNOT00000024301	NONRATT022152.2	0.975635	1.49726e-06	Gins4	NONRATT022152.2
ENSRNOT00000002510	NONRATT024911.2	0.975628	1.49894e-06	Mcm4	NONRATT024911.2
ENSRNOT00000037444	NONRATT003292.2	0.975625	1.49969e-06	Mis18a	NONRATT003292.2
ENSRNOT00000012038	NONRATT001466.2	0.975619	1.50106e-06	Kif14	NONRATT001466.2
ENSRNOT00000065349	NONRATT015585.2	0.97559	1.50812e-06	Kifc1	NONRATT015585.2
ENSRNOT00000091172	NONRATT009960.2	0.975588	1.50883e-06	Brip1	NONRATT009960.2
ENSRNOT00000075997	NONRATT001466.2	0.975585	1.50944e-06	Pola1	NONRATT001466.2
ENSRNOT00000021308	NONRATT008517.2	0.975571	1.51291e-06	Fam83d	NONRATT008517.2
ENSRNOT00000022231	NONRATT001466.2	0.97556	1.51556e-06	Mcm2	NONRATT001466.2
ENSRNOT00000085344	TCONS_00010418	0.975557	1.51626e-06	Top2a	TCONS_00010418
ENSRNOT00000047420	NONRATT016343.2	0.975551	1.51779e-06	Palb2	NONRATT016343.2
ENSRNOT00000043387	NONRATT008517.2	0.97554	1.5206e-06	Incenp	NONRATT008517.2
ENSRNOT00000005070	NONRATT008580.2	0.975538	1.521e-06	Pttg1	NONRATT008580.2
ENSRNOT00000083111	TCONS_00021565	0.975533	1.5222e-06	Brca1	TCONS_00021565
ENSRNOT00000010955	NONRATT029356.2	0.975532	1.52246e-06	Gins1	NONRATT029356.2
ENSRNOT00000064824	NONRATT014026.2	0.975522	1.52504e-06	Rbl1	NONRATT014026.2
ENSRNOT00000022256	NONRATT008517.2	0.975519	1.52566e-06	Ns5atp9	NONRATT008517.2
ENSRNOT00000043387	NONRATT015583.2	0.975519	1.52581e-06	Incenp	NONRATT015583.2
ENSRNOT00000083111	NONRATT008517.2	0.975516	1.52644e-06	Brca1	NONRATT008517.2
ENSRNOT00000068623	NONRATT024911.2	0.975488	1.5333e-06	Nsl1	NONRATT024911.2
ENSRNOT00000005857	NONRATT033407.1	0.975488	1.53345e-06	Fignl1	NONRATT033407.1
ENSRNOT00000022658	NONRATT018485.2	0.975444	1.54448e-06	Fanca	NONRATT018485.2
ENSRNOT00000083340	NONRATT016343.2	0.975443	1.54462e-06	Cdk5rap2	NONRATT016343.2
ENSRNOT00000031163	NONRATT016047.2	0.975438	1.54577e-06	Cdca2	NONRATT016047.2
ENSRNOT00000091016	NONRATT001466.2	0.975422	1.55e-06	Aurkb	NONRATT001466.2
ENSRNOT00000002487	NONRATT033405.1	0.975407	1.55363e-06	Rfc4	NONRATT033405.1
ENSRNOT00000012454	NONRATT018439.2	0.975401	1.55526e-06	Knstrn	NONRATT018439.2
ENSRNOT00000087132	NONRATT014811.2	0.975392	1.55733e-06	Rad51b	NONRATT014811.2
ENSRNOT00000028109	NONRATT009960.2	0.975392	1.55745e-06	Brca1	NONRATT009960.2
ENSRNOT00000065721	NONRATT028662.2	0.975389	1.55808e-06	Sgol1	NONRATT028662.2
ENSRNOT00000035255	NONRATT033405.1	0.975376	1.56144e-06	Ncapg2	NONRATT033405.1
ENSRNOT00000085880	NONRATT001466.2	0.975365	1.56425e-06	Kif20b	NONRATT001466.2
ENSRNOT00000010696	NONRATT030261.2	0.975358	1.56585e-06	Ccne2	NONRATT030261.2
ENSRNOT00000004525	NONRATT008517.2	0.975342	1.56991e-06	Cenpf	NONRATT008517.2
ENSRNOT00000037368	NONRATT033405.1	0.975338	1.57103e-06	Cdc25c	NONRATT033405.1
ENSRNOT00000004969	NONRATT015584.2	0.975334	1.57195e-06	Mcm6	NONRATT015584.2
ENSRNOT00000008149	NONRATT018485.2	0.975328	1.57354e-06	Ezh2	NONRATT018485.2
ENSRNOT00000029416	NONRATT016045.2	0.975325	1.57433e-06	Fbxo5	NONRATT016045.2
ENSRNOT00000002085	NONRATT022152.2	0.975314	1.5772e-06	Hat1	NONRATT022152.2
ENSRNOT00000085344	NONRATT030132.2	0.97531	1.57802e-06	Top2a	NONRATT030132.2
ENSRNOT00000083016	NONRATT016343.2	0.975287	1.58403e-06	Ncapd2	NONRATT016343.2
ENSRNOT00000039344	NONRATT029356.2	0.975281	1.58546e-06	Bora	NONRATT029356.2
ENSRNOT00000083016	NONRATT008517.2	0.975276	1.58673e-06	Ncapd2	NONRATT008517.2
ENSRNOT00000031163	NONRATT030261.2	0.975274	1.58735e-06	Cdca2	NONRATT030261.2
ENSRNOT00000077899	TCONS_00021565	0.975271	1.58797e-06	Mastl	TCONS_00021565
ENSRNOT00000008149	NONRATT008580.2	0.975253	1.5926e-06	Ezh2	NONRATT008580.2
ENSRNOT00000035512	NONRATT018551.2	0.975249	1.59355e-06	E2f8	NONRATT018551.2
ENSRNOT00000036098	NONRATT001047.2	0.975241	1.5956e-06	Ska2	NONRATT001047.2
ENSRNOT00000017081	NONRATT008517.2	0.975214	1.60266e-06	Mcm3	NONRATT008517.2
ENSRNOT00000017314	NONRATT016343.2	0.97521	1.60363e-06	Espl1	NONRATT016343.2
ENSRNOT00000081970	NONRATT012538.2	0.975177	1.6122e-06	LOC103690190	NONRATT012538.2
ENSRNOT00000072493	NONRATT024911.2	0.975167	1.61477e-06	Cdca5	NONRATT024911.2
ENSRNOT00000065349	NONRATT009960.2	0.975166	1.61497e-06	Kifc1	NONRATT009960.2
ENSRNOT00000024301	NONRATT027850.2	0.975162	1.61601e-06	Gins4	NONRATT027850.2
ENSRNOT00000028109	NONRATT018485.2	0.975154	1.61805e-06	Brca1	NONRATT018485.2
ENSRNOT00000006235	TCONS_00021565	0.975153	1.61839e-06	Nek2l1	TCONS_00021565
ENSRNOT00000020803	NONRATT003292.2	0.975148	1.61953e-06	Cdca3	NONRATT003292.2
ENSRNOT00000002299	NONRATT030261.2	0.975143	1.62085e-06	Chaf1b	NONRATT030261.2
ENSRNOT00000012512	NONRATT003289.2	0.975142	1.62119e-06	Cenpa	NONRATT003289.2
ENSRNOT00000038176	NONRATT016045.2	0.975138	1.62223e-06	Mki67	NONRATT016045.2
ENSRNOT00000005857	NONRATT018485.2	0.975124	1.62586e-06	Fignl1	NONRATT018485.2
ENSRNOT00000035383	NONRATT008517.2	0.97512	1.62681e-06	Pmf1	NONRATT008517.2
ENSRNOT00000047420	NONRATT018439.2	0.975118	1.62744e-06	Palb2	NONRATT018439.2
ENSRNOT00000083848	NONRATT032352.1	0.975092	1.63408e-06	Uhrf1	NONRATT032352.1
ENSRNOT00000089178	NONRATT028358.2	0.975085	1.63602e-06	Skp2	NONRATT028358.2
ENSRNOT00000022133	NONRATT005180.2	0.975079	1.63747e-06	Cep55	NONRATT005180.2
ENSRNOT00000010025	NONRATT018485.2	0.97506	1.64255e-06	Xrcc2	NONRATT018485.2
ENSRNOT00000012985	NONRATT004419.2	0.975052	1.64453e-06	Cdkn3	NONRATT004419.2
ENSRNOT00000075997	NONRATT016045.2	0.97505	1.64522e-06	Pola1	NONRATT016045.2
ENSRNOT00000013216	NONRATT016047.2	0.975046	1.64614e-06	Ift80	NONRATT016047.2
ENSRNOT00000085591	NONRATT001466.2	0.975043	1.647e-06	Chek2	NONRATT001466.2
ENSRNOT00000008254	NONRATT016343.2	0.975041	1.64756e-06	Dsn1	NONRATT016343.2
ENSRNOT00000038176	NONRATT001466.2	0.975012	1.65517e-06	Mki67	NONRATT001466.2
ENSRNOT00000065721	NONRATT017519.2	0.975002	1.6578e-06	Sgol1	NONRATT017519.2
ENSRNOT00000022658	NONRATT016343.2	0.974972	1.66568e-06	Fanca	NONRATT016343.2
ENSRNOT00000046798	NONRATT005180.2	0.974971	1.66597e-06	Mdc1	NONRATT005180.2
ENSRNOT00000017635	NONRATT033407.1	0.974917	1.68009e-06	Hmgb2l1	NONRATT033407.1
ENSRNOT00000084445	NONRATT033405.1	0.974915	1.68075e-06	Cenpn	NONRATT033405.1
ENSRNOT00000068520	NONRATT009960.2	0.97491	1.68204e-06	Cdc7	NONRATT009960.2
ENSRNOT00000019799	NONRATT030261.2	0.974907	1.68278e-06	Lig1	NONRATT030261.2
ENSRNOT00000016157	NONRATT029356.2	0.9749	1.68486e-06	Ncaph	NONRATT029356.2
ENSRNOT00000091172	NONRATT030132.2	0.974892	1.68682e-06	Brip1	NONRATT030132.2
ENSRNOT00000085176	NONRATT033407.1	0.974883	1.68927e-06	Kif18a	NONRATT033407.1
ENSRNOT00000025389	NONRATT024911.2	0.974882	1.68949e-06	Gmnn	NONRATT024911.2
ENSRNOT00000082846	NONRATT001466.2	0.974876	1.69105e-06	Ccnb1	NONRATT001466.2
ENSRNOT00000004969	NONRATT005335.2	0.974873	1.69197e-06	Mcm6	NONRATT005335.2
ENSRNOT00000021156	TCONS_00021565	0.974837	1.70157e-06	Ccna2	TCONS_00021565
ENSRNOT00000063990	NONRATT008517.2	0.974836	1.70185e-06	Kntc1	NONRATT008517.2
ENSRNOT00000022231	NONRATT031214.2	0.97483	1.70342e-06	Mcm2	NONRATT031214.2
ENSRNOT00000012038	NONRATT015583.2	0.974829	1.70383e-06	Kif14	NONRATT015583.2
ENSRNOT00000021308	NONRATT030261.2	0.974823	1.70536e-06	Fam83d	NONRATT030261.2
ENSRNOT00000074148	NONRATT018485.2	0.974822	1.70572e-06	Lin9	NONRATT018485.2
ENSRNOT00000012512	NONRATT009960.2	0.974821	1.70601e-06	Cenpa	NONRATT009960.2
ENSRNOT00000084128	NONRATT008580.2	0.974803	1.71072e-06	Kif18b	NONRATT008580.2
ENSRNOT00000067453	NONRATT003289.2	0.974797	1.71239e-06	Pole	NONRATT003289.2
ENSRNOT00000064392	NONRATT005180.2	0.974793	1.71329e-06	Ccnf	NONRATT005180.2
ENSRNOT00000036702	NONRATT008517.2	0.974788	1.71471e-06	Cenpt	NONRATT008517.2
ENSRNOT00000008254	NONRATT016045.2	0.97476	1.72225e-06	Dsn1	NONRATT016045.2
ENSRNOT00000032723	NONRATT016045.2	0.974736	1.72872e-06	Ska3	NONRATT016045.2
ENSRNOT00000004969	NONRATT008580.2	0.974734	1.72931e-06	Mcm6	NONRATT008580.2
ENSRNOT00000036098	TCONS_00010418	0.974732	1.72984e-06	Ska2	TCONS_00010418
ENSRNOT00000028109	NONRATT018439.2	0.974726	1.73163e-06	Brca1	NONRATT018439.2
ENSRNOT00000047420	NONRATT003292.2	0.974687	1.74227e-06	Palb2	NONRATT003292.2
ENSRNOT00000032972	NONRATT015585.2	0.97468	1.74418e-06	Tacc3	NONRATT015585.2
ENSRNOT00000085880	NONRATT016045.2	0.974666	1.74804e-06	Kif20b	NONRATT016045.2
ENSRNOT00000048293	TCONS_00010418	0.974662	1.74895e-06	Cdca8	TCONS_00010418
ENSRNOT00000083340	NONRATT014982.2	0.974656	1.75065e-06	Cdk5rap2	NONRATT014982.2
ENSRNOT00000043387	NONRATT024911.2	0.974649	1.75254e-06	Incenp	NONRATT024911.2
ENSRNOT00000002085	NONRATT015583.2	0.974645	1.75368e-06	Hat1	NONRATT015583.2
ENSRNOT00000036702	NONRATT014811.2	0.974644	1.75404e-06	Cenpt	NONRATT014811.2
ENSRNOT00000036098	NONRATT008570.2	0.974639	1.75525e-06	Ska2	NONRATT008570.2
ENSRNOT00000017532	NONRATT001466.2	0.974635	1.75632e-06	Prc1	NONRATT001466.2
ENSRNOT00000025629	NONRATT022152.2	0.974635	1.75654e-06	Plk1	NONRATT022152.2
ENSRNOT00000051783	NONRATT016045.2	0.974628	1.7585e-06	Bub1	NONRATT016045.2
ENSRNOT00000002299	NONRATT008580.2	0.974626	1.75902e-06	Chaf1b	NONRATT008580.2
ENSRNOT00000005835	NONRATT022152.2	0.974625	1.75918e-06	Pole2	NONRATT022152.2
ENSRNOT00000047420	NONRATT033405.1	0.974624	1.75957e-06	Palb2	NONRATT033405.1
ENSRNOT00000010406	NONRATT014982.2	0.974615	1.76209e-06	Bub1b	NONRATT014982.2
ENSRNOT00000037444	NONRATT026936.2	0.9746	1.76611e-06	Mis18a	NONRATT026936.2
ENSRNOT00000043387	NONRATT016047.2	0.974592	1.76843e-06	Incenp	NONRATT016047.2
ENSRNOT00000020014	NONRATT008570.2	0.974591	1.76869e-06	Ccne1	NONRATT008570.2
ENSRNOT00000025903	NONRATT003292.2	0.974573	1.77356e-06	Kif2c	NONRATT003292.2
ENSRNOT00000039467	NONRATT005357.2	0.974572	1.77378e-06	Orc6	NONRATT005357.2
ENSRNOT00000008149	NONRATT016047.2	0.97457	1.77427e-06	Ezh2	NONRATT016047.2
ENSRNOT00000085591	NONRATT016045.2	0.97453	1.78543e-06	Chek2	NONRATT016045.2
ENSRNOT00000085880	NONRATT014026.2	0.974527	1.78631e-06	Kif20b	NONRATT014026.2
ENSRNOT00000021308	NONRATT003292.2	0.974527	1.78636e-06	Fam83d	NONRATT003292.2
ENSRNOT00000001825	NONRATT030261.2	0.974524	1.78721e-06	Mcm7	NONRATT030261.2
ENSRNOT00000051783	TCONS_00021565	0.974522	1.78765e-06	Bub1	TCONS_00021565
ENSRNOT00000082618	NONRATT014982.2	0.974491	1.79632e-06	Fancd2	NONRATT014982.2
ENSRNOT00000021156	NONRATT029356.2	0.974483	1.79856e-06	Ccna2	NONRATT029356.2
ENSRNOT00000072027	NONRATT030132.2	0.974482	1.79877e-06	Cdc45	NONRATT030132.2
ENSRNOT00000017314	NONRATT028662.2	0.974474	1.80124e-06	Espl1	NONRATT028662.2
ENSRNOT00000010955	NONRATT016047.2	0.974473	1.80137e-06	Gins1	NONRATT016047.2
ENSRNOT00000022658	NONRATT028662.2	0.974462	1.80455e-06	Fanca	NONRATT028662.2
ENSRNOT00000032972	NONRATT016045.2	0.974443	1.80977e-06	Tacc3	NONRATT016045.2
ENSRNOT00000064392	NONRATT008517.2	0.974439	1.81089e-06	Ccnf	NONRATT008517.2
[truncated: 16,344 more rows]
